# Supplementary material for: Deletion of Asxl1 results in myelodysplasia and severe developmental defects in vivo
Source: PubMed Central journal article supplement — J Exp Med. 2013 Nov 18;210(12):2641–59. doi: 10.1084/jem.20131141 (PMC3832937; doi:10.1084/jem.20131141), 2013-11-18
Supplement: supp_jem.20131141_JEM_20131141_sm.pdf [file supp_jem.20131141_JEM_20131141_sm.pdf]

## SUPPLEMENTAL MATERIAL

Abdel-Wahab et al., <http://www.jem.org/cgi/content/full/jem.20131141/DC1>

Table S1, included as a separate PDF file, shows differentially expressed transcripts between 1-yr-old *Mx1-cre Asxl1<sup>fl/fl</sup>* and *Asxl1<sup>fl/fl</sup>* LSK cells by RNA sequencing.

Table S2, included as a separate PDF files, shows differentially expressed transcripts between 1-yr-old *Mx1-cre Asxl1<sup>fl/fl</sup>* and *Asxl1<sup>fl/fl</sup>* MPs by RNA sequencing.

Table S3, included as a separate PDF file, shows differentially expressed genes in LSK cells from 6-wk-old *Mx1-cre Asxl1<sup>fl/fl</sup>*, *Mx1-cre Tet2<sup>fl/fl</sup>*, and *Mx1-cre Asxl1<sup>fl/fl</sup> Tet2<sup>fl/fl</sup>*.

Table S4, included as a separate PDF file, shows regions with significant *Asxl1* binding by anti-*Asxl1* ChIP-Seq.

Table S5, included as a separate PDF file, shows genes with significant *Asxl1* binding  $\pm 2$  kb from the TSS as determined by anti-*Asxl1* ChIP-Seq.
