# Supplementary material for: Deletion of Asxl1 results in myelodysplasia and severe developmental defects in vivo
Source: PubMed Central journal article supplement — J Exp Med. 2013 Nov 18;210(12):2641–59. doi: 10.1084/jem.20131141 (PMC3832937; doi:10.1084/jem.20131141), 2013-11-18
Supplement: supp_jem.20131141_JEM_20131141_TableS1.pdf [file supp_jem.20131141_JEM_20131141_TableS1.pdf]

**Table S1.** Differentially expressed transcripts between 1-yr-old *Mx1-cre* *Asx1<sup>f/f</sup>* and *Asx1<sup>f/f</sup>* LSK cells by RNA sequencing

| Gene                 | Locus                     | Asx1 KO   | WT       | log2 (fold change) | Test stat     | P-value     | Q-value     |
|----------------------|---------------------------|-----------|----------|--------------------|---------------|-------------|-------------|
| <i>Moxd1</i>         | chr10:23943322-24022589   | 0         | 0.841756 | 1.79769e+308       | 1.79769e+308  | 0.000881112 | 0.0181475   |
| <i>BC025920</i>      | chr10:81069052-81072581   | 0         | 1.43641  | 1.79769e+308       | 1.79769e+308  | 0.00090746  | 0.018558    |
| <i>Cyp46a1</i>       | chr12:109572590-109600444 | 0         | 0.996751 | 1.79769e+308       | 1.79769e+308  | 0.00253593  | 0.0386619   |
| <i>Pvr13</i>         | chr16:46394970-46497080   | 0         | 1.07657  | 1.79769e+308       | 1.79769e+308  | 0.000242494 | 0.00710864  |
| <i>Slc25a27</i>      | chr17:43778848-43803964   | 0         | 1.13473  | 1.79769e+308       | 1.79769e+308  | 0.000413579 | 0.0107336   |
| <i>Katnal2</i>       | chr18:77231938-77286035   | 0         | 1.18083  | 1.79769e+308       | 1.79769e+308  | 0.00352163  | 0.0476201   |
| <i>Ubqln3</i>        | chr7:111289136-111291786  | 0         | 0.806224 | 1.79769e+308       | 1.79769e+308  | 0.00352163  | 0.0476201   |
| <i>Klh40</i>         | chr9:121686724-121692937  | 0         | 1.70681  | 1.79769e+308       | 1.79769e+308  | 4.85E-05    | 0.00207998  |
| <i>Plp1</i>          | chrX:133357374-133372281  | 0         | 0.857    | 1.79769e+308       | 1.79769e+308  | 0.00202175  | 0.0328676   |
| <i>Zfp365</i>        | chr10:67348852-67375410   | 0.724183  | 0        | -1.79769e+308      | -1.79769e+308 | 0.00370368  | 0.0491629   |
| <i>Xkrx</i>          | chrX:130683583-130696467  | 0.0293139 | 2.11649  | 6.17395            | -3.18255      | 0.00145982  | 0.0261738   |
| <i>Ifit3</i>         | chr19:34658018-34663472   | 0.0387094 | 1.63184  | 5.39767            | -3.50082      | 0.000463836 | 0.0117498   |
| <i>Col1a1</i>        | chr11:94797583-94813170   | 0.0337693 | 0.788423 | 4.54519            | -3.13691      | 0.00170738  | 0.0290205   |
| <i>C1qtnf1</i>       | chr11:118289770-118316309 | 0.0664221 | 1.40688  | 4.40469            | -3.55234      | 0.000381821 | 0.0101366   |
| <i>Prkab2</i>        | chr3:97462134-97476990    | 0.054012  | 0.949249 | 4.13544            | -3.14678      | 0.00165082  | 0.0283926   |
| <i>Stap2</i>         | chr17:56136501-56144991   | 0.120483  | 1.92376  | 3.99702            | -3.17925      | 0.00147654  | 0.0262308   |
| <i>Pcdhb12</i>       | chr18:37089938-38001526   | 0.0502473 | 0.732377 | 3.86547            | -3.34464      | 0.000823894 | 0.0174663   |
| <i>Kdelr3</i>        | chr15:79346837-79377171   | 0.182358  | 2.36464  | 3.69677            | -3.00971      | 0.002615    | 0.0392081   |
| <i>Gpr128</i>        | chr16:56724721-56795971   | 0.144872  | 1.52983  | 3.40052            | -3.00088      | 0.00269202  | 0.0397959   |
| <i>Slc13a2</i>       | chr11:78207986-78235687   | 0.157083  | 1.62375  | 3.36973            | -2.94517      | 0.00322781  | 0.0445481   |
| <i>D930048N14Rik</i> | chr11:51456590-51471183   | 0.150894  | 1.54993  | 3.3606             | -3.16935      | 0.00152782  | 0.0268353   |
| <i>Wdr47</i>         | chr3:108394195-108448637  | 0.246694  | 2.33537  | 3.24286            | -3.74651      | 0.000179312 | 0.00578164  |
| <i>Epha7</i>         | chr4:28740294-28894649    | 0.130594  | 0.950683 | 2.86387            | -3.0751       | 0.00210434  | 0.0337364   |
| <i>Mtfr2</i>         | chr10:20067624-20081475   | 2.28348   | 15.9453  | 2.80383            | -6.15659      | 7.43E-10    | 1.21E-07    |
| <i>Ly6k</i>          | chr15:74627303-74630398   | 2.56281   | 17.1466  | 2.74212            | -3.56005      | 0.00037078  | 0.00991172  |
| <i>Zfp738</i>        | chr13:67768377-67784449   | 0.303612  | 1.99666  | 2.71729            | -3.40908      | 0.000651833 | 0.0150598   |
| <i>Caskin2</i>       | chr11:115660665-115674906 | 0.500225  | 2.7415   | 2.45432            | -3.78535      | 0.000153492 | 0.0051603   |
| <i>Ddx60</i>         | chr8:64406885-64516492    | 0.42304   | 1.87645  | 2.14914            | -3.40793      | 0.000654586 | 0.0150615   |
| <i>Fbxl18</i>        | chr5:143633467-143656917  | 0.897859  | 3.97589  | 2.14672            | -3.3546       | 0.000794798 | 0.0170682   |
| <i>Stox1</i>         | chr10:62122169-62188847   | 0.697667  | 2.95132  | 2.08075            | -3.04256      | 0.00234574  | 0.0364788   |
| <i>Slc2a10</i>       | chr2:165329477-165345411  | 0.840389  | 3.32484  | 1.98415            | -3.23776      | 0.00120472  | 0.0228601   |
| <i>Chad</i>          | chr11:94418415-94463100   | 7.04156   | 26.9734  | 1.93757            | -5.79314      | 6.91E-09    | 1.01E-06    |
| <i>Thbs1</i>         | chr2:117937657-117952869  | 1.40511   | 5.03698  | 1.84188            | -4.79515      | 1.63E-06    | 0.000124606 |
| <i>Myl10</i>         | chr5:137169015-137176964  | 7.33155   | 25.9836  | 1.82541            | -3.38948      | 0.000700254 | 0.0156778   |
| <i>Tmem104</i>       | chr11:115048800-115108339 | 1.91124   | 6.70107  | 1.80988            | -4.89596      | 9.78E-07    | 8.09E-05    |
| <i>Hoxa3</i>         | chr6:52119060-52163596    | 1.13566   | 3.93033  | 1.79112            | -2.90674      | 0.00365218  | 0.0487589   |
| <i>Eif2c4</i>        | chr4:126166786-126210702  | 0.785142  | 2.66414  | 1.76264            | -3.7465       | 0.000179318 | 0.00578164  |
| <i>Cenpk</i>         | chr13:105019034-105039697 | 2.98623   | 10.1213  | 1.76099            | -3.18215      | 0.00146185  | 0.0261738   |
| <i>Trim12a</i>       | chr7:111448410-111473352  | 2.17749   | 7.3304   | 1.75122            | -2.94694      | 0.00320933  | 0.0444248   |
| <i>Cd200r1</i>       | chr16:44765848-44795090   | 2.33277   | 7.85175  | 1.75097            | -3.3803       | 0.000724061 | 0.0159335   |
| <i>Atxn7l1</i>       | chr12:33832550-33936022   | 1.9612    | 6.51739  | 1.73256            | -2.94144      | 0.00326695  | 0.0449643   |
| <i>Fbxo44</i>        | chr4:147526908-147534173  | 1.81015   | 5.41659  | 1.58127            | -3.46531      | 0.000529617 | 0.0130155   |

|                  |                           |          |          |         |          |             |             |
|------------------|---------------------------|----------|----------|---------|----------|-------------|-------------|
| <i>Wasl</i>      | chr6:24563809-24614995    | 1.21532  | 3.58075  | 1.55892 | -3.31222 | 0.000925597 | 0.0188291   |
| <i>Fam46c</i>    | chr3:100275458-100293115  | 5.09112  | 14.9851  | 1.55747 | -4.36639 | 1.26E-05    | 0.000699592 |
| <i>Smm5</i>      | chr11:115753908-115794806 | 7.51902  | 21.8789  | 1.54092 | -3.46247 | 0.000535242 | 0.0131259   |
| <i>Pou6f1</i>    | chr15:100405748-100416796 | 1.21982  | 3.46068  | 1.50439 | -3.26805 | 0.00108293  | 0.0211738   |
| <i>Trim34a</i>   | chr7:111392970-111410750  | 5.99969  | 16.8893  | 1.49315 | -5.04428 | 4.55E-07    | 4.12E-05    |
| <i>Zfp949</i>    | chr9:88442857-88465924    | 1.46514  | 3.99875  | 1.44851 | -2.99546 | 0.00274035  | 0.0402533   |
| <i>Tnfrif3</i>   | chr10:18720716-18735216   | 1.38287  | 3.73745  | 1.43439 | -3.20742 | 0.00133932  | 0.0246833   |
| <i>Gdpgp1</i>    | chr7:87377778-87386306    | 1.41783  | 3.79118  | 1.41896 | -2.90533 | 0.00366868  | 0.0489228   |
| <i>Plxna3</i>    | chrX:71574404-71590028    | 0.828284 | 2.19277  | 1.40456 | -3.08097 | 0.00206327  | 0.0334019   |
| <i>Adrb2</i>     | chr18:62337469-62339613   | 2.78617  | 7.34043  | 1.39758 | -3.02088 | 0.00252044  | 0.0384883   |
| <i>Pycr1</i>     | chr11:120497025-120504984 | 2.01147  | 5.22941  | 1.3784  | -3.01133 | 0.00260102  | 0.0392081   |
| <i>Xist</i>      | chrX:100626855-100680296  | 0.354943 | 0.920569 | 1.37494 | -3.06468 | 0.00217902  | 0.0346548   |
| <i>Homer1</i>    | chr13:94074449-94174917   | 0.495962 | 1.27014  | 1.35669 | -3.13441 | 0.00172202  | 0.0291409   |
| <i>Trp53inp1</i> | chr4:11083587-11101524    | 1.67121  | 4.14529  | 1.31058 | -5.83547 | 5.36E-09    | 8.17E-07    |
| <i>Nudt22</i>    | chr19:7067508-7070527     | 10.2594  | 25.3016  | 1.30228 | -3.42435 | 0.000616263 | 0.0145691   |
| <i>Gab2</i>      | chr7:104230260-104457461  | 1.66526  | 4.09483  | 1.29805 | -3.62837 | 0.000285212 | 0.00815144  |
| <i>Zfp239</i>    | chr6:117813094-117822784  | 3.17987  | 7.76142  | 1.28735 | -4.27124 | 1.94E-05    | 0.000986876 |
| <i>Rbm48</i>     | chr5:3571715-3637101      | 3.77228  | 9.06945  | 1.26558 | -3.26165 | 0.00110766  | 0.021333    |
| <i>Slc6a15</i>   | chr10:102830441-102882013 | 2.92367  | 7.01889  | 1.26346 | -3.55642 | 0.000375939 | 0.0100034   |
| <i>Utp6</i>      | chr11:79747457-79775889   | 3.45903  | 8.29086  | 1.26115 | -3.98327 | 6.80E-05    | 0.00278023  |
| <i>Socs3</i>     | chr11:117827400-117830680 | 6.79133  | 16.2204  | 1.25604 | -4.51971 | 6.19E-06    | 0.000381258 |
| <i>Stxbp3a</i>   | chr3:108596097-108643420  | 3.09518  | 7.36715  | 1.25108 | -3.00276 | 0.00267539  | 0.0396513   |
| <i>Stk25</i>     | chr1:95408680-95532304    | 8.59659  | 20.3148  | 1.24069 | -5.35849 | 8.39E-08    | 9.91E-06    |
| <i>Dmtf1</i>     | chr5:9100736-9161776      | 4.32149  | 10.2003  | 1.23901 | -8.38473 | 0           | 0           |
| <i>Lyst</i>      | chr13:13682675-13869707   | 0.599806 | 1.40728  | 1.23034 | -2.96248 | 0.00305174  | 0.0432068   |
| <i>Slc52a3</i>   | chr2:151822246-151834994  | 1.55806  | 3.57852  | 1.19961 | -2.97491 | 0.0029307   | 0.0420054   |
| <i>Acvr1</i>     | chr2:58298848-58419239    | 2.25084  | 5.09698  | 1.17918 | -3.0653  | 0.00217448  | 0.0346548   |
| <i>Mrps31</i>    | chr8:23521811-23540137    | 7.4078   | 16.6476  | 1.1682  | -3.29404 | 0.000987572 | 0.0198457   |
| <i>G2e3</i>      | chr12:52449216-52477973   | 1.53913  | 3.45672  | 1.16729 | -3.26462 | 0.00109612  | 0.0212951   |
| <i>Adcy3</i>     | chr12:4133396-4240123     | 2.60919  | 5.84291  | 1.16309 | -3.88004 | 0.000104441 | 0.00387469  |
| <i>Dapk1</i>     | chr13:60703307-60864547   | 1.84295  | 4.07978  | 1.14647 | -3.52096 | 0.000429989 | 0.0110603   |
| <i>Tuft1</i>     | chr3:94416680-94462728    | 4.48173  | 9.83806  | 1.13432 | -3.27963 | 0.00103943  | 0.020637    |
| <i>Tfpi</i>      | chr2:84273016-84316932    | 8.16748  | 17.7096  | 1.11657 | -3.919   | 8.89E-05    | 0.00343537  |
| <i>Dnajc13</i>   | chr9:104053926-104165260  | 2.70664  | 5.84454  | 1.11059 | -4.26215 | 2.02E-05    | 0.00102341  |
| <i>Mettl23</i>   | chr11:116704828-116711054 | 25.6766  | 55.0985  | 1.10156 | -4.3764  | 1.21E-05    | 0.000671427 |
| <i>Samd9l</i>    | chr6:3322256-3349571      | 1.71364  | 3.67473  | 1.10057 | -2.90887 | 0.00362737  | 0.0485396   |
| <i>Trmt5</i>     | chr12:74381396-74387698   | 8.63996  | 18.5192  | 1.09993 | -3.44529 | 0.000570453 | 0.0137562   |
| <i>Mettl3</i>    | chr14:52881433-52924799   | 5.42159  | 11.5916  | 1.09629 | -3.04421 | 0.00233293  | 0.0363728   |
| <i>Spag9</i>     | chr11:93857404-93987396   | 1.70328  | 3.57478  | 1.06953 | -8.23856 | 2.22E-16    | 1.03E-13    |
| <i>Strn3</i>     | chr12:52709527-52839926   | 3.87415  | 8.10259  | 1.0645  | -3.60534 | 0.000311746 | 0.00871609  |
| <i>Ly6a</i>      | chr15:74825306-74828461   | 73.2699  | 152.369  | 1.05628 | -7.78631 | 6.88E-15    | 2.85E-12    |
| <i>Gtf2e1</i>    | chr16:37509881-37539855   | 5.75755  | 11.881   | 1.04514 | -3.64114 | 0.000271432 | 0.00781548  |
| <i>Apbb1</i>     | chr7:112706978-112730167  | 2.40576  | 4.95914  | 1.0436  | -3.37061 | 0.000750022 | 0.0163436   |
| <i>Mis12</i>     | chr11:70833112-70840636   | 5.04795  | 10.4017  | 1.04305 | -3.27456 | 0.00105827  | 0.0209751   |

|                      |                           |         |         |          |          |             |             |
|----------------------|---------------------------|---------|---------|----------|----------|-------------|-------------|
| <i>Cadps2</i>        | chr6:23212773-23789421    | 2.32344 | 4.74508 | 1.03017  | -3.18391 | 0.00145298  | 0.0261738   |
| <i>Sgsm3</i>         | chr15:80808194-81021187   | 5.00789 | 10.0667 | 1.00731  | -3.27111 | 0.00107126  | 0.0210881   |
| <i>Srsf5</i>         | chr12:82046490-82051494   | 12.0251 | 24.1499 | 1.00597  | -5.71012 | 1.13E-08    | 1.59E-06    |
| <i>Lbp</i>           | chr2:158132228-158158588  | 22.7376 | 45.2702 | 0.993481 | -5.69275 | 1.25E-08    | 1.74E-06    |
| <i>Copz1</i>         | chr15:103103348-103130295 | 58.0739 | 115.489 | 0.991797 | -6.90868 | 4.89E-12    | 1.32E-09    |
| <i>Ino80</i>         | chr2:119198778-119303365  | 2.58771 | 5.08949 | 0.975843 | -3.3249  | 0.000884491 | 0.0181847   |
| <i>Usp20</i>         | chr2:30837798-30878175    | 3.84749 | 7.50816 | 0.964543 | -3.22997 | 0.00123803  | 0.0233391   |
| <i>Pon3</i>          | chr6:5170851-5206233      | 14.3677 | 28.0288 | 0.964083 | -3.86916 | 0.000109212 | 0.00400042  |
| <i>Lsg1</i>          | chr16:30561454-30587675   | 7.63997 | 14.8023 | 0.95418  | -3.28141 | 0.00103289  | 0.0205424   |
| <i>Phf15</i>         | chr11:51626957-51670983   | 4.01728 | 7.72501 | 0.943319 | -3.82732 | 0.000129549 | 0.00453029  |
| <i>Brd9</i>          | chr13:74075285-74098343   | 10.9541 | 20.9783 | 0.937425 | -3.83647 | 0.000124816 | 0.00442308  |
| <i>Vldlr</i>         | chr19:27291509-27328721   | 2.28101 | 4.3641  | 0.936012 | -4.94769 | 7.51E-07    | 6.39E-05    |
| <i>Zkscan6</i>       | chr11:65620745-65642741   | 7.31736 | 13.9291 | 0.928702 | -3.1133  | 0.00185006  | 0.0306359   |
| <i>Rbm8a</i>         | chr3:96433850-96437714    | 4.29888 | 8.1681  | 0.926041 | -3.54403 | 0.000394059 | 0.0102962   |
| <i>Als2cl</i>        | chr9:110782677-110803034  | 4.26292 | 8.06054 | 0.919037 | -3.74067 | 0.000183528 | 0.00586832  |
| <i>Adpgk</i>         | chr9:59139378-59164007    | 7.33456 | 13.8368 | 0.915728 | -3.18456 | 0.00144973  | 0.0261738   |
| <i>Alas2</i>         | chrX:146981959-147005165  | 7.95267 | 14.9502 | 0.910648 | -2.95312 | 0.00314578  | 0.0437721   |
| <i>Selp</i>          | chr1:166045394-166150405  | 12.9048 | 24.1607 | 0.904757 | -4.6634  | 3.11E-06    | 0.000219523 |
| <i>Trpm7</i>         | chr2:126617293-126701997  | 2.66541 | 4.98572 | 0.903443 | -4.9813  | 6.32E-07    | 5.50E-05    |
| <i>Elovl6</i>        | chr3:129235303-129341411  | 4.38611 | 8.14477 | 0.892932 | -3.70716 | 0.000209598 | 0.00645016  |
| <i>Kntc1</i>         | chr5:124199734-124271602  | 4.08646 | 7.58308 | 0.891932 | -3.84283 | 0.000121622 | 0.00435844  |
| <i>Trip4</i>         | chr9:65676732-65756601    | 1.44575 | 2.67829 | 0.889492 | -3.60988 | 0.000306341 | 0.00858995  |
| <i>Ibtk</i>          | chr9:85580966-85642941    | 4.96566 | 9.18408 | 0.88715  | -3.79941 | 0.000145044 | 0.00492341  |
| <i>Sall2</i>         | chr14:52930851-52948345   | 3.82495 | 7.05243 | 0.882679 | -3.1245  | 0.0017811   | 0.0298354   |
| <i>Asb8</i>          | chr15:97965070-97996009   | 17.5936 | 32.3781 | 0.879965 | -8.97905 | 0           | 0           |
| <i>lfi35</i>         | chr11:101309725-101320015 | 19.3934 | 35.6716 | 0.879211 | -3.49502 | 0.000474028 | 0.011954    |
| <i>Rnf185</i>        | chr11:3315985-3352328     | 11.7611 | 21.6118 | 0.877796 | -4.00308 | 6.25E-05    | 0.00261126  |
| <i>Leprel2</i>       | chr6:124791112-124807705  | 6.22115 | 11.3983 | 0.873565 | -2.98334 | 0.00285117  | 0.0413563   |
| <i>Aptx</i>          | chr4:40629110-40650220    | 2.14262 | 3.9244  | 0.873094 | -3.15717 | 0.00159309  | 0.0277024   |
| <i>Polr3k</i>        | chr2:181599064-181605531  | 13.9549 | 25.3199 | 0.859496 | -4.24798 | 2.16E-05    | 0.00106703  |
| <i>Nfatc3</i>        | chr8:108583502-108654437  | 4.45517 | 8.04784 | 0.853122 | -3.57407 | 0.000351479 | 0.00955017  |
| <i>Crat</i>          | chr2:30247935-30271268    | 7.43291 | 13.3414 | 0.843914 | -3.82437 | 0.000131108 | 0.00455727  |
| <i>Ctla2a</i>        | chr13:61035515-61037986   | 49.2978 | 88.4839 | 0.843891 | -5.21995 | 1.79E-07    | 1.91E-05    |
| <i>1110008L16Rik</i> | chr12:56381800-56483478   | 7.02131 | 12.5364 | 0.836316 | -3.14523 | 0.00165955  | 0.0284583   |
| <i>Mtpap</i>         | chr18:4375589-4397328     | 12.264  | 21.7839 | 0.828839 | -3.7067  | 0.000209981 | 0.00645016  |
| <i>Tvp23b</i>        | chr11:62692991-62708686   | 13.128  | 23.3041 | 0.827933 | -3.12908 | 0.00175353  | 0.0295876   |
| <i>Zfp120</i>        | chr2:149940142-149962414  | 3.42131 | 6.05732 | 0.824129 | -5.13565 | 2.81E-07    | 2.76E-05    |
| <i>Stip1</i>         | chr19:7095185-7114516     | 26.074  | 45.9507 | 0.817475 | -4.58923 | 4.45E-06    | 0.000290927 |
| <i>Tfr2</i>          | chr5:138011078-138028709  | 41.4603 | 72.8161 | 0.812528 | -6.2312  | 4.63E-10    | 8.50E-08    |
| <i>Rars2</i>         | chr4:34562206-34607416    | 11.0412 | 19.359  | 0.810102 | -2.91704 | 0.00353374  | 0.0476725   |
| <i>Retnlg</i>        | chr16:48872720-48874611   | 47.5809 | 82.9175 | 0.801293 | -3.01336 | 0.00258376  | 0.0391453   |
| <i>Sdhd</i>          | chr9:50404444-50411954    | 38.6708 | 67.273  | 0.798782 | -4.12257 | 3.75E-05    | 0.0016875   |
| <i>Hbb-b1</i>        | chr7:110961041-110962437  | 317.012 | 551.471 | 0.798749 | -6.64102 | 3.12E-11    | 7.51E-09    |
| <i>Arfgap3</i>       | chr15:83130169-83180677   | 10.6336 | 18.4864 | 0.797825 | -3.32687 | 0.000878263 | 0.018121    |

|                      |                           |         |         |          |          |             |             |
|----------------------|---------------------------|---------|---------|----------|----------|-------------|-------------|
| <i>Echdc1</i>        | chr10:29032971-29082248   | 6.97768 | 12.1047 | 0.79475  | -3.00478 | 0.0026577   | 0.0394396   |
| <i>Hba-a2</i>        | chr11:32196491-32197310   | 548.191 | 946.167 | 0.787416 | -7.50821 | 6.00E-14    | 2.04E-11    |
| <i>Skp1a</i>         | chr11:52045496-52060360   | 23.7084 | 40.9124 | 0.787139 | -3.50426 | 0.00045788  | 0.0116739   |
| <i>Asx1</i>          | chr2:153171874-153229743  | 8.89777 | 15.3083 | 0.782798 | -4.57946 | 4.66E-06    | 0.000302217 |
| <i>Uqcc</i>          | chr2:155672621-155756046  | 11.6026 | 19.9594 | 0.782621 | -3.52637 | 0.000421302 | 0.0108852   |
| <i>Gpr125</i>        | chr5:50351189-50450235    | 8.26664 | 14.2147 | 0.782007 | -3.71884 | 0.000200138 | 0.0062442   |
| <i>Smcr8</i>         | chr11:60591026-60601789   | 3.05225 | 5.24481 | 0.781021 | -3.03886 | 0.00237478  | 0.036798    |
| <i>8430427H17Rik</i> | chr2:153233196-153355707  | 2.53957 | 4.36315 | 0.780786 | -3.29966 | 0.000968007 | 0.0195544   |
| <i>Rogdi</i>         | chr16:5008821-5013646     | 26.5138 | 45.3667 | 0.774888 | -3.53907 | 0.000401537 | 0.010468    |
| <i>Fyn</i>           | chr10:39089604-39285180   | 10.0847 | 17.2234 | 0.772196 | -9.25996 | 0           | 0           |
| <i>Mecom</i>         | chr3:29850217-29912126    | 6.6968  | 11.4103 | 0.768789 | -3.32717 | 0.000877315 | 0.018121    |
| <i>Rpl29</i>         | chr9:106331869-106333898  | 827.635 | 1406.43 | 0.764969 | -9.13523 | 0           | 0           |
| <i>Eif2ak4</i>       | chr2:118214352-118300970  | 4.83155 | 8.20379 | 0.763805 | -3.1304  | 0.00174571  | 0.0294986   |
| <i>Pycl</i>          | chr15:75746892-75751990   | 36.33   | 61.5118 | 0.759702 | -3.90046 | 9.60E-05    | 0.00364366  |
| <i>Rsrc2</i>         | chr5:124178438-124199421  | 16.8629 | 28.5245 | 0.758344 | -3.87216 | 0.000107873 | 0.00396392  |
| <i>Armc8</i>         | chr9:99356661-99469318    | 6.50737 | 11.0046 | 0.757954 | -3.48717 | 0.000488157 | 0.0122569   |
| <i>Polr2g</i>        | chr19:8867618-8873047     | 43.4263 | 73.3343 | 0.75592  | -3.34276 | 0.000829502 | 0.017521    |
| <i>Pum1</i>          | chr4:130219273-130337479  | 4.80898 | 8.11409 | 0.7547   | -4.04182 | 5.30E-05    | 0.0022406   |
| <i>Beta-s</i>        | chr7:110975036-110976442  | 1071.47 | 1806.88 | 0.753906 | -9.21013 | 0           | 0           |
| <i>Sf3a3</i>         | chr4:124392104-124409666  | 22.0792 | 37.1468 | 0.750547 | -3.48024 | 0.000500965 | 0.0124435   |
| <i>Psmc2</i>         | chr5:21291100-21309602    | 28.952  | 48.6561 | 0.74896  | -3.99145 | 6.57E-05    | 0.00269552  |
| <i>Slc25a19</i>      | chr11:115475494-115489609 | 7.49733 | 12.5916 | 0.748011 | -4.63914 | 3.50E-06    | 0.000238212 |
| <i>Pno1</i>          | chr11:17103202-17111592   | 33.2521 | 55.8037 | 0.746913 | -3.9634  | 7.39E-05    | 0.00297944  |
| <i>Dctn3</i>         | chr4:41661829-41670195    | 28.8052 | 48.3292 | 0.746568 | -2.93521 | 0.00333319  | 0.0456657   |
| <i>Gtf2h2</i>        | chr13:101238531-101262564 | 19.7787 | 33.033  | 0.739959 | -3.28207 | 0.00103048  | 0.0205345   |
| <i>Padi4</i>         | chr4:140301422-140330118  | 18.6466 | 31.1005 | 0.738029 | -3.90641 | 9.37E-05    | 0.00356678  |
| <i>Prepl</i>         | chr17:85427686-85489614   | 4.58122 | 7.63923 | 0.737694 | -6.55725 | 5.48E-11    | 1.22E-08    |
| <i>Trim25</i>        | chr11:88860716-88881607   | 8.40554 | 13.9708 | 0.732999 | -3.85162 | 0.000117337 | 0.00423109  |
| <i>Igj</i>           | chr5:88948833-88956922    | 369.354 | 613.737 | 0.732618 | -9.77237 | 0           | 0           |
| <i>L3mbtl2</i>       | chr15:81494365-81527717   | 11.176  | 18.5642 | 0.732113 | -3.50168 | 0.000462342 | 0.0117498   |
| <i>Cep250</i>        | chr2:155782293-155824636  | 4.8487  | 8.04115 | 0.729802 | -4.09177 | 4.28E-05    | 0.001877    |
| <i>Wdr11</i>         | chr7:136735376-136779252  | 6.49114 | 10.765  | 0.729802 | -3.14853 | 0.00164092  | 0.0282643   |
| <i>Rrbp1</i>         | chr2:143773130-143836999  | 16.8475 | 27.9374 | 0.729664 | -4.95705 | 7.16E-07    | 6.14E-05    |
| <i>Ggta1</i>         | chr2:35255698-35316945    | 5.30244 | 8.78278 | 0.728022 | -3.9325  | 8.41E-05    | 0.00330985  |
| <i>Haus3,Poln</i>    | chr5:34349846-34512097    | 14.3768 | 23.7416 | 0.723674 | -2.97674 | 0.00291334  | 0.0420054   |
| <i>Mfap3</i>         | chr11:57332166-57347319   | 8.5475  | 14.1018 | 0.722303 | -3.69116 | 0.000223233 | 0.0067053   |
| <i>Dhfr</i>          | chr13:92981835-93159008   | 9.52128 | 15.7043 | 0.721934 | -3.89948 | 9.64E-05    | 0.00364656  |
| <i>Fam111a</i>       | chr19:12648014-12671056   | 22.6787 | 37.3698 | 0.720534 | -4.50041 | 6.78E-06    | 0.000413179 |
| <i>Ppp2r5e</i>       | chr12:76551867-76697187   | 6.91656 | 11.3966 | 0.720474 | -3.26591 | 0.00109114  | 0.0212626   |
| <i>Ddx19b</i>        | chr8:113527085-113555651  | 4.12027 | 6.78106 | 0.718772 | -3.00795 | 0.00263012  | 0.0393329   |
| <i>Pdpk1</i>         | chr17:24210646-24278561   | 3.70118 | 6.08204 | 0.716572 | -2.96204 | 0.00305612  | 0.0432068   |
| <i>Med14</i>         | chrX:12252496-12339099    | 4.08552 | 6.70153 | 0.713973 | -3.0646  | 0.00217958  | 0.0346548   |
| <i>Uba7</i>          | chr9:107877897-107886387  | 35.8181 | 58.6764 | 0.712089 | -5.30413 | 1.13E-07    | 1.27E-05    |
| <i>Prps1</i>         | chrX:136991141-137010679  | 33.2353 | 54.3443 | 0.709414 | -4.18443 | 2.86E-05    | 0.00136178  |

|                      |                           |         |         |          |          |             |             |
|----------------------|---------------------------|---------|---------|----------|----------|-------------|-------------|
| <i>Ubtf</i>          | chr11:102165873-102180410 | 23.4847 | 38.3968 | 0.709264 | -8.43662 | 0           | 0           |
| <i>Ncoa7</i>         | chr10:30365387-30522913   | 8.27923 | 13.5287 | 0.708449 | -3.00521 | 0.00265395  | 0.0394396   |
| <i>Mtmr1</i>         | chrX:68617934-68672371    | 5.98624 | 9.76842 | 0.706474 | -2.95804 | 0.00309602  | 0.0433232   |
| <i>Stxbp4</i>        | chr11:90337806-90499422   | 6.33487 | 10.3323 | 0.705778 | -3.40244 | 0.000667868 | 0.0152016   |
| <i>Ddi2,Rsc1a1</i>   | chr4:141239477-141279334  | 6.92514 | 11.285  | 0.704495 | -3.07755 | 0.00208712  | 0.0336468   |
| <i>Gtf2b</i>         | chr3:142428210-142446569  | 35.2592 | 57.4139 | 0.703401 | -3.42381 | 0.000617506 | 0.0145691   |
| <i>Hba-a2</i>        | chr11:32183674-32184493   | 433.957 | 706.42  | 0.702973 | -6.15678 | 7.42E-10    | 1.21E-07    |
| <i>Acaca</i>         | chr11:84008939-84215153   | 4.01814 | 6.52925 | 0.700392 | -3.32102 | 0.000896876 | 0.0183983   |
| <i>Mast2</i>         | chr4:115979366-116136788  | 6.41811 | 10.4263 | 0.700011 | -3.9605  | 7.48E-05    | 0.00298524  |
| <i>Hnrnp2</i>        | chrX:131135824-131141593  | 21.9834 | 35.6708 | 0.698325 | -3.75429 | 0.000173832 | 0.00571622  |
| <i>Lars</i>          | chr18:42362002-42421725   | 20.6715 | 33.4386 | 0.693868 | -4.49085 | 7.09E-06    | 0.000428862 |
| <i>Mical2</i>        | chr5:140182646-140212287  | 9.2812  | 15.0096 | 0.693501 | -3.02675 | 0.00247198  | 0.0378982   |
| <i>Pnp</i>           | chr14:51563977-51573087   | 70.094  | 113.265 | 0.692338 | -6.39704 | 1.58E-10    | 3.40E-08    |
| <i>Ctla2b</i>        | chr13:60996711-60998808   | 22.2159 | 35.8832 | 0.691715 | -3.44745 | 0.000565899 | 0.0136749   |
| <i>Zfp426</i>        | chr9:20272992-20297190    | 5.03067 | 8.12003 | 0.690735 | -3.39638 | 0.000682837 | 0.0154246   |
| <i>Snx14</i>         | chr9:88271584-88333789    | 11.4094 | 18.4009 | 0.689563 | -3.17946 | 0.00147548  | 0.0262308   |
| <i>Bcat2</i>         | chr7:52823164-52845080    | 26.4823 | 42.6972 | 0.689117 | -7.28169 | 3.30E-13    | 1.06E-10    |
| <i>Ndufc2</i>        | chr7:104548512-104556310  | 60.5542 | 97.6079 | 0.688771 | -3.04877 | 0.00229777  | 0.0361016   |
| <i>Cdv3</i>          | chr9:103255431-103268110  | 16.6206 | 26.7858 | 0.688498 | -3.8362  | 0.000124954 | 0.00442308  |
| <i>Kdm1a</i>         | chr4:136106447-136158638  | 10.2493 | 16.4818 | 0.685346 | -2.97527 | 0.00292731  | 0.0420054   |
| <i>Zfp280c</i>       | chrX:45894802-45947629    | 2.74754 | 4.41742 | 0.68506  | -3.28966 | 0.00100309  | 0.0201226   |
| <i>Phf5a</i>         | chr15:81694945-81702322   | 27.6923 | 44.4399 | 0.682369 | -3.42066 | 0.000624697 | 0.0146374   |
| <i>Ptpn11</i>        | chr5:121580541-121641406  | 8.40985 | 13.4944 | 0.68221  | -3.58105 | 0.000342222 | 0.00943531  |
| <i>6330416G13Rik</i> | chr4:63221393-63247387    | 9.6359  | 15.4612 | 0.682156 | -3.12536 | 0.00177585  | 0.0297905   |
| <i>Naprt1</i>        | chr15:75721393-75724911   | 19.1977 | 30.7759 | 0.680871 | -3.11704 | 0.00182675  | 0.0303802   |
| <i>Gtpbp5</i>        | chr2:179805297-179820607  | 7.01728 | 11.2472 | 0.680581 | -2.99477 | 0.00274656  | 0.0402933   |
| <i>Pygm</i>          | chr19:6384428-6398459     | 13.058  | 20.9133 | 0.679488 | -3.18265 | 0.00145932  | 0.0261738   |
| <i>Th1l</i>          | chr2:174241304-174264493  | 26.8088 | 42.9066 | 0.678492 | -3.89561 | 9.80E-05    | 0.00369308  |
| <i>Atp11c</i>        | chrX:57476466-57657156    | 2.04245 | 3.26727 | 0.677789 | -3.40079 | 0.000671922 | 0.0152202   |
| <i>Tubb6</i>         | chr18:67550384-67562403   | 36.8097 | 58.7093 | 0.673504 | -3.90771 | 9.32E-05    | 0.00355937  |
| <i>Ivd</i>           | chr2:118687735-118707093  | 23.2794 | 36.9969 | 0.668347 | -3.45473 | 0.000550841 | 0.0133668   |
| <i>Heatr1</i>        | chr13:12487641-12531160   | 8.15143 | 12.9456 | 0.667332 | -3.74548 | 0.000180049 | 0.00578909  |
| <i>A130010J15Rik</i> | chr1:194999662-195027740  | 6.64816 | 10.5552 | 0.66693  | -3.30061 | 0.00096476  | 0.0195229   |
| <i>Golph3l</i>       | chr3:95392855-95423169    | 14.7028 | 23.3435 | 0.666927 | -4.98834 | 6.09E-07    | 5.34E-05    |
| <i>Uso1</i>          | chr5:92566963-92631821    | 10.0543 | 15.9407 | 0.664898 | -3.20653 | 0.00134345  | 0.0246833   |
| <i>Ncf4</i>          | chr15:78075240-78093010   | 52.7585 | 83.512  | 0.662578 | -4.08631 | 4.38E-05    | 0.0019144   |
| <i>Fastkd3</i>       | chr13:68721124-68731156   | 15.2222 | 24.0647 | 0.660744 | -3.02974 | 0.0024476   | 0.0376899   |
| <i>Bend5</i>         | chr4:110070395-111330115  | 4.78136 | 7.55698 | 0.660389 | -2.97318 | 0.00294735  | 0.042118    |
| <i>Safb</i>          | chr17:56724404-56745717   | 18.4698 | 29.175  | 0.65956  | -3.76045 | 0.000169611 | 0.00564152  |
| <i>Mdp1</i>          | chr14:56276715-56279345   | 16.6722 | 26.3329 | 0.659419 | -2.95754 | 0.00310109  | 0.0433232   |
| <i>Nif3l1</i>        | chr1:58504476-58519120    | 20.0181 | 31.5709 | 0.657292 | -3.20848 | 0.00133438  | 0.0246733   |
| <i>Morf4l2</i>       | chrX:133267489-133337900  | 70.374  | 110.788 | 0.654691 | -6.46887 | 9.87E-11    | 2.16E-08    |
| <i>Prosc</i>         | chr8:28153026-28166604    | 17.3096 | 27.2424 | 0.65428  | -3.82861 | 0.00012887  | 0.00452022  |
| <i>Anapc1</i>        | chr2:128435818-128513131  | 15.5865 | 24.501  | 0.652544 | -5.31779 | 1.05E-07    | 1.20E-05    |

|                 |                           |         |         |          |          |             |             |
|-----------------|---------------------------|---------|---------|----------|----------|-------------|-------------|
| <i>Rnf13</i>    | chr3:57539987-57639155    | 17.9619 | 28.2254 | 0.652055 | -3.42651 | 0.000611401 | 0.0145225   |
| <i>Pard6a</i>   | chr8:108225053-108227394  | 8.1013  | 12.7048 | 0.649151 | -2.90402 | 0.0036841   | 0.049052    |
| <i>Rnf187</i>   | chr11:58745789-58752408   | 46.735  | 73.1111 | 0.645588 | -4.31525 | 1.59E-05    | 0.000846468 |
| <i>Kdelc1</i>   | chr1:44163390-44175618    | 17.7156 | 27.6907 | 0.644387 | -3.1257  | 0.0017738   | 0.0297905   |
| <i>Pdia6</i>    | chr12:17273400-17331536   | 98.4859 | 153.875 | 0.643766 | -5.92034 | 3.21E-09    | 4.96E-07    |
| <i>Poldip3</i>  | chr15:82956407-82979766   | 25.8896 | 40.3927 | 0.641726 | -4.23223 | 2.31E-05    | 0.00112645  |
| <i>Lipa</i>     | chr19:34566805-34601964   | 13.8515 | 21.597  | 0.640792 | -3.33422 | 0.000855382 | 0.0178719   |
| <i>Npc1</i>     | chr18:12327238-12394895   | 8.2316  | 12.8223 | 0.639408 | -3.20801 | 0.00133657  | 0.0246744   |
| <i>Ppp1r7</i>   | chr1:95240221-95264195    | 9.59274 | 14.9358 | 0.638757 | -2.93295 | 0.00335755  | 0.0458298   |
| <i>Ppp1cb</i>   | chr5:32761342-32796085    | 35.5926 | 55.3507 | 0.637022 | -5.18633 | 2.14E-07    | 2.21E-05    |
| <i>Cdca5</i>    | chr19:6085096-6091773     | 37.4782 | 58.2545 | 0.636318 | -3.84943 | 0.000118392 | 0.00425585  |
| <i>Snap23</i>   | chr2:120393406-120426458  | 16.5955 | 25.7787 | 0.635393 | -4.76564 | 1.88E-06    | 0.00013968  |
| <i>Edem1</i>    | chr6:108778634-108809350  | 6.99404 | 10.8592 | 0.634722 | -3.14002 | 0.00168935  | 0.0289263   |
| <i>Agtrap</i>   | chr4:147451169-147462173  | 15.2764 | 23.7159 | 0.634553 | -3.6998  | 0.000215772 | 0.00653725  |
| <i>Psm12</i>    | chr11:107340841-107359350 | 25.3518 | 39.3433 | 0.634031 | -3.1125  | 0.00185512  | 0.0306757   |
| <i>Cd48</i>     | chr1:173612185-173635388  | 49.781  | 77.196  | 0.632931 | -3.39009 | 0.00069869  | 0.0156731   |
| <i>Hipk1</i>    | chr3:103543737-103595198  | 7.96968 | 12.3276 | 0.629297 | -3.76413 | 0.000167129 | 0.00557499  |
| <i>Hsph1</i>    | chr5:150419419-150438890  | 17.5302 | 27.0476 | 0.625662 | -3.61353 | 0.000302055 | 0.00852754  |
| <i>Pwp2</i>     | chr10:77633654-77647894   | 16.6032 | 25.6028 | 0.624841 | -3.69752 | 0.000217714 | 0.00656261  |
| <i>Rpl7l1</i>   | chr17:46910855-46919605   | 19.6845 | 30.3541 | 0.62483  | -3.3372  | 0.000846275 | 0.0177779   |
| <i>Nol9</i>     | chr4:151413435-151435603  | 10.5215 | 16.2156 | 0.624039 | -3.03181 | 0.00243094  | 0.0375175   |
| <i>Tbc1d15</i>  | chr10:114634926-114688549 | 13.189  | 20.3227 | 0.623758 | -3.31456 | 0.000917875 | 0.0187379   |
| <i>Glpr1</i>    | chr10:111409750-111434320 | 55.858  | 86.0323 | 0.623115 | -3.38567 | 0.000710051 | 0.0157477   |
| <i>Glrx3</i>    | chr7:144629330-144660277  | 23.6521 | 36.3676 | 0.620686 | -2.89718 | 0.00376535  | 0.0498102   |
| <i>Ak2</i>      | chr4:128670467-128688773  | 38.457  | 59.0707 | 0.619198 | -3.7556  | 0.00017293  | 0.00570275  |
| <i>Jagn1</i>    | chr6:113392510-113398223  | 72.6082 | 111.326 | 0.616585 | -4.57674 | 4.72E-06    | 0.000303697 |
| <i>Ap1g2</i>    | chr14:55713620-55725430   | 22.283  | 34.1267 | 0.614954 | -3.48725 | 0.00048801  | 0.0122569   |
| <i>Uba3</i>     | chr6:97133809-97155636    | 6.48055 | 9.91725 | 0.613824 | -3.67384 | 0.000238931 | 0.00704532  |
| <i>Mzb1</i>     | chr18:35806918-35809021   | 92.997  | 142.085 | 0.611495 | -3.77117 | 0.000162481 | 0.00543562  |
| <i>Wars</i>     | chr12:110098239-110132384 | 35.1604 | 53.7179 | 0.611453 | -4.93686 | 7.94E-07    | 6.66E-05    |
| <i>Pnrc2</i>    | chr4:135426840-135429761  | 45.392  | 69.288  | 0.610167 | -3.99268 | 6.53E-05    | 0.00269109  |
| <i>Stt3a</i>    | chr9:36539997-36575163    | 35.7622 | 54.5735 | 0.609766 | -4.21606 | 2.49E-05    | 0.00119456  |
| <i>Gmnn</i>     | chr13:24843713-24853806   | 62.8082 | 95.8443 | 0.60974  | -3.3123  | 0.000925307 | 0.0188292   |
| <i>Polr1a</i>   | chr6:71859046-71929355    | 6.79483 | 10.3636 | 0.60902  | -3.02295 | 0.00250325  | 0.0383269   |
| <i>Necap2</i>   | chr4:140622426-140634260  | 35.3635 | 53.8975 | 0.607958 | -3.58032 | 0.000343176 | 0.00943531  |
| <i>Arhgdib</i>  | chr6:136872229-136890238  | 171.207 | 260.842 | 0.607432 | -5.20745 | 1.91E-07    | 2.00E-05    |
| <i>Pafah1b1</i> | chr11:74487450-74537886   | 7.06949 | 10.7612 | 0.606157 | -5.33116 | 9.76E-08    | 1.13E-05    |
| <i>Morf4l1</i>  | chr9:89986506-90009658    | 18.3034 | 27.8572 | 0.605935 | -2.90812 | 0.00363613  | 0.0486007   |
| <i>Creb1</i>    | chr1:64579377-64651122    | 3.77868 | 5.74365 | 0.604087 | -3.79754 | 0.000146139 | 0.00494607  |
| <i>Wdr73</i>    | chr7:88035608-88046155    | 30.9077 | 46.9562 | 0.60335  | -4.56945 | 4.89E-06    | 0.000312718 |
| <i>Atp6ap1</i>  | chrX:71542435-71550060    | 23.3034 | 35.3995 | 0.603188 | -3.1865  | 0.00144006  | 0.0260855   |
| <i>Sec24b</i>   | chr3:129686102-129763825  | 13.549  | 20.5573 | 0.601469 | -3.55656 | 0.000375737 | 0.0100034   |
| <i>Aifm1</i>    | chrX:45828120-45866603    | 20.4993 | 31.0909 | 0.600922 | -2.95046 | 0.00317299  | 0.0439849   |
| <i>Smchd1</i>   | chr17:71693833-71824683   | 7.96876 | 12.08   | 0.600196 | -3.38755 | 0.000705189 | 0.0157275   |

|                       |                           |         |         |          |          |             |             |
|-----------------------|---------------------------|---------|---------|----------|----------|-------------|-------------|
| <i>Psm1</i>           | chr7:121408063-121419630  | 117.834 | 178.551 | 0.599581 | -4.73765 | 2.16E-06    | 0.0001574   |
| <i>Nubp2</i>          | chr17:25019555-25023295   | 36.0635 | 54.5618 | 0.597353 | -3.10413 | 0.00190837  | 0.0314664   |
| <i>Sirt1</i>          | chr10:62781752-62801783   | 3.30723 | 4.99944 | 0.596144 | -3.33047 | 0.000866986 | 0.0180492   |
| <i>Il2rg</i>          | chrX:98459725-98463545    | 35.8575 | 54.1449 | 0.594551 | -3.26405 | 0.00109833  | 0.0212951   |
| <i>7-Sep</i>          | chr9:25060039-25116156    | 48.2577 | 72.7198 | 0.591589 | -4.56605 | 4.97E-06    | 0.000316091 |
| <i>Txndc5</i>         | chr13:38592143-38620329   | 64.9976 | 97.3751 | 0.583167 | -4.99019 | 6.03E-07    | 5.33E-05    |
| <i>Emg1</i>           | chr6:124613121-124662196  | 113.482 | 169.704 | 0.58056  | -4.12795 | 3.66E-05    | 0.00165493  |
| <i>Cbr1</i>           | chr16:93608081-93610594   | 72.5886 | 108.485 | 0.579681 | -3.51761 | 0.000435455 | 0.0111513   |
| <i>Jmjd1c</i>         | chr10:66590005-66719074   | 3.14385 | 4.69783 | 0.579461 | -4.16437 | 3.12E-05    | 0.00146312  |
| <i>Usp25</i>          | chr16:77014313-77117025   | 12.4384 | 18.5846 | 0.579303 | -3.20083 | 0.00137032  | 0.0249802   |
| <i>9030624J02Rik</i>  | chr7:125883784-125985005  | 15.2698 | 22.7062 | 0.572405 | -3.1526  | 0.00161823  | 0.0279567   |
| <i>Bclaf1</i>         | chr10:20032274-20062307   | 10.3813 | 15.4225 | 0.571055 | -5.06511 | 4.08E-07    | 3.78E-05    |
| <i>Spcs2</i>          | chr7:106986078-107007393  | 35.5547 | 52.7951 | 0.570363 | -4.00235 | 6.27E-05    | 0.00261126  |
| <i>Gm6793,Hnrnpa3</i> | chr2:75497315-75507464    | 14.2568 | 21.1503 | 0.569027 | -3.56536 | 0.000363363 | 0.00975853  |
| <i>Lax1</i>           | chr1:135575605-135586685  | 7.35992 | 10.9174 | 0.568862 | -3.65051 | 0.000261725 | 0.00759265  |
| <i>Tgtp2</i>          | chr11:48798830-48805756   | 23.2927 | 34.5476 | 0.568713 | -3.35148 | 0.000803807 | 0.0172297   |
| <i>Api5</i>           | chr2:94251883-94278304    | 41.167  | 60.89   | 0.564719 | -4.67985 | 2.87E-06    | 0.000205124 |
| <i>Skiv2l2</i>        | chr13:113657987-113717588 | 14.753  | 21.8204 | 0.564668 | -2.95699 | 0.00310654  | 0.0433232   |
| <i>Oasl2</i>          | chr5:115346942-115362254  | 23.1683 | 34.257  | 0.564245 | -3.48572 | 0.000490817 | 0.0122704   |
| <i>Ubb</i>            | chr11:62365005-62366714   | 1854.48 | 2741.69 | 0.564052 | -8.64808 | 0           | 0           |
| <i>Lyz2</i>           | chr10:116714596-116719328 | 381.837 | 563.681 | 0.561922 | -6.16592 | 7.01E-10    | 1.19E-07    |
| <i>Tpi1</i>           | chr6:124758958-124764314  | 166.521 | 245.588 | 0.560538 | -5.51597 | 3.47E-08    | 4.57E-06    |
| <i>Edc3</i>           | chr9:57556375-57597969    | 15.7057 | 23.152  | 0.559851 | -3.01534 | 0.00256695  | 0.0389416   |
| <i>Cpne1,Rbm12</i>    | chr2:155897576-155937701  | 34.9015 | 51.3744 | 0.557759 | -5.55427 | 2.79E-08    | 3.80E-06    |
| <i>Mtor</i>           | chr4:147822690-147931794  | 6.66099 | 9.78842 | 0.555338 | -3.15547 | 0.00160238  | 0.0277657   |
| <i>Fam214a</i>        | chr9:74800859-74880275    | 4.42846 | 6.50632 | 0.555036 | -2.95732 | 0.00310325  | 0.0433232   |
| <i>Vwa9</i>           | chr9:64808638-64834781    | 14.2076 | 20.8457 | 0.55309  | -3.05986 | 0.00221442  | 0.0351122   |
| <i>Mfn2</i>           | chr4:147247703-147278928  | 13.8267 | 20.2722 | 0.552042 | -3.1793  | 0.0014763   | 0.0262308   |
| <i>Cope</i>           | chr8:72826683-72836889    | 164.068 | 240.541 | 0.551987 | -4.51077 | 6.46E-06    | 0.000395595 |
| <i>Med22</i>          | chr2:26760786-26766162    | 29.9874 | 43.927  | 0.550749 | -4.44059 | 8.97E-06    | 0.000511547 |
| <i>Hectd1</i>         | chr12:52844708-52930523   | 7.35855 | 10.7742 | 0.550088 | -3.30917 | 0.000935739 | 0.0190021   |
| <i>Elp3</i>           | chr14:66149282-66211949   | 29.717  | 43.5068 | 0.549954 | -6.85491 | 7.14E-12    | 1.84E-09    |
| <i>Whsc1</i>          | chr5:34185760-34240615    | 10.2364 | 14.9715 | 0.548506 | -4.23922 | 2.24E-05    | 0.00110481  |
| <i>0610009D07Rik</i>  | chr12:4824413-4834465     | 119.441 | 174.653 | 0.548194 | -4.11357 | 3.90E-05    | 0.00173786  |
| <i>Brca2</i>          | chr5:151325197-151372324  | 2.05508 | 3.00472 | 0.548037 | -3.17818 | 0.00148203  | 0.0262544   |
| <i>Bcap31</i>         | chrX:70931521-70961514    | 68.5289 | 100.15  | 0.547371 | -3.421   | 0.000623916 | 0.0146374   |
| <i>Hsbp1</i>          | chr8:121868437-121872829  | 65.8976 | 95.5868 | 0.536585 | -3.23479 | 0.00121731  | 0.0230236   |
| <i>Fkbp2</i>          | chr19:7052228-7054951     | 46.5914 | 67.5203 | 0.53526  | -2.9988  | 0.00271045  | 0.0399153   |
| <i>Lgals9</i>         | chr11:78776480-78798426   | 279.823 | 405.307 | 0.5345   | -6.20517 | 5.46E-10    | 9.88E-08    |
| <i>Apobec1</i>        | chr6:122527809-122552462  | 9.9425  | 14.3961 | 0.533992 | -3.21091 | 0.00132316  | 0.0245049   |
| <i>Prim1</i>          | chr10:127452270-127467086 | 46.3936 | 67.0716 | 0.531777 | -3.15618 | 0.00159853  | 0.0277406   |
| <i>Clpb</i>           | chr7:108812281-108938682  | 14.8704 | 21.498  | 0.531757 | -3.18516 | 0.00144676  | 0.026166    |
| <i>Top2b</i>          | chr14:17197719-17263301   | 13.8172 | 19.9734 | 0.531614 | -3.40427 | 0.0006634   | 0.015174    |
| <i>Isg20</i>          | chr7:86058650-86065282    | 42.0386 | 60.6675 | 0.529211 | -4.60709 | 4.08E-06    | 0.000272767 |

|                           |                           |         |         |          |          |             |             |
|---------------------------|---------------------------|---------|---------|----------|----------|-------------|-------------|
| <i>Trip12</i>             | chr1:84717763-84835879    | 8.08905 | 11.6693 | 0.528678 | -3.40376 | 0.00066464  | 0.015174    |
| <i>Erh</i>                | chr12:81735009-81744848   | 86.7964 | 125.065 | 0.526968 | -2.9637  | 0.00303967  | 0.0431179   |
| <i>Top2a</i>              | chr11:98854260-98885503   | 31.3069 | 45.0913 | 0.52637  | -4.47695 | 7.57E-06    | 0.000451757 |
| <i>Suz12</i>              | chr11:79806607-79847625   | 13.2732 | 19.117  | 0.526339 | -3.92916 | 8.52E-05    | 0.00334474  |
| <i>Hnrnpm</i>             | chr17:33783177-33822403   | 96.1193 | 138.243 | 0.52431  | -6.91499 | 4.68E-12    | 1.29E-09    |
| <i>Zfp322a</i>            | chr13:23444972-23461071   | 3.0738  | 4.4199  | 0.52399  | -3.56754 | 0.000360349 | 0.00974541  |
| <i>Cyp51</i>              | chr5:4080673-4104697      | 13.045  | 18.7552 | 0.5238   | -2.9287  | 0.00340386  | 0.0462804   |
| <i>Ppp2ca</i>             | chr11:51912325-51936251   | 43.411  | 62.2139 | 0.519177 | -3.32789 | 0.000875069 | 0.018121    |
| <i>Chst12</i>             | chr5:140981562-141001192  | 54.5528 | 78.0236 | 0.516258 | -3.50618 | 0.000454585 | 0.0116155   |
| <i>Myo1f</i>              | chr17:33692651-33744709   | 23.2074 | 33.1881 | 0.516084 | -3.45659 | 0.000547049 | 0.0133307   |
| <i>Sdha</i>               | chr13:74459702-74487688   | 93.4194 | 133.594 | 0.516064 | -5.15773 | 2.50E-07    | 2.52E-05    |
| <i>Clptm1l</i>            | chr13:73741449-73758087   | 33.54   | 47.9405 | 0.515364 | -3.26597 | 0.00109092  | 0.0212626   |
| <i>Oxr1</i>               | chr15:41279027-41692593   | 21.915  | 31.2807 | 0.513355 | -3.70162 | 0.000214224 | 0.00653725  |
| <i>C2cd3</i>              | chr7:107520742-107618668  | 9.36164 | 13.3349 | 0.510376 | -3.18235 | 0.00146085  | 0.0261738   |
| <i>Adsl</i>               | chr15:80778919-80801377   | 48.9798 | 69.6832 | 0.508622 | -4.45619 | 8.34E-06    | 0.000485264 |
| <i>Cux1</i>               | chr5:136724004-137043301  | 38.8149 | 55.1526 | 0.50682  | -3.74872 | 0.000177743 | 0.00577913  |
| <i>Capza1</i>             | chr3:104625702-104667423  | 60.2901 | 85.6535 | 0.506591 | -4.53535 | 5.75E-06    | 0.000359817 |
| <i>Cul7</i>               | chr17:46787286-46801313   | 14.7415 | 20.8914 | 0.503025 | -3.27246 | 0.00106615  | 0.0210591   |
| <i>Nup205</i>             | chr6:35127615-35197598    | 12.7845 | 18.1087 | 0.502287 | -3.23911 | 0.00119905  | 0.0227899   |
| <i>Magt1</i>              | chrX:103163423-103207238  | 11.5636 | 16.3621 | 0.500763 | -5.31456 | 1.07E-07    | 1.21E-05    |
| <i>Eif3a</i>              | chr19:60837018-60866596   | 29.2179 | 41.3287 | 0.500293 | -4.13369 | 3.57E-05    | 0.00162068  |
| <i>Eif2s2</i>             | chr2:154697145-154718642  | 35.8067 | 50.6209 | 0.499502 | -3.32735 | 0.000876752 | 0.018121    |
| <i>Ctage5</i>             | chr12:60230732-60291207   | 4.13208 | 5.83883 | 0.498809 | -2.90369 | 0.00368798  | 0.049052    |
| <i>Srp68</i>              | chr11:116106479-116135531 | 36.7916 | 51.9489 | 0.497718 | -3.36096 | 0.000776714 | 0.0167109   |
| <i>Iqgap2</i>             | chr13:96397131-96661877   | 13.7833 | 19.4524 | 0.497032 | -3.20504 | 0.00135043  | 0.0247576   |
| <i>Chi3l3</i>             | chr3:105950471-105970482  | 82.5631 | 116.514 | 0.496938 | -3.72001 | 0.000199217 | 0.00623682  |
| <i>Psmb5</i>              | chr14:55232956-55236832   | 93.2494 | 131.375 | 0.494528 | -2.96463 | 0.0030305   | 0.0430405   |
| <i>Mbnl2</i>              | chr14:120674890-120830920 | 6.96299 | 9.80617 | 0.493983 | -2.9582  | 0.00309437  | 0.0433232   |
| <i>Fgd2</i>               | chr17:29497858-29516480   | 28.1599 | 39.6055 | 0.492062 | -4.82321 | 1.41E-06    | 0.000110486 |
| <i>Mir704,Pdia4</i>       | chr6:47746139-47763511    | 29.1892 | 41.0334 | 0.491366 | -2.99012 | 0.00278866  | 0.0406021   |
| <i>Cdc23</i>              | chr18:34758268-34811390   | 18.3029 | 25.7217 | 0.490913 | -3.04397 | 0.00233477  | 0.0363728   |
| <i>Ifi203</i>             | chr1:175850533-175872623  | 19.5153 | 27.3596 | 0.487446 | -3.89371 | 9.87E-05    | 0.00371014  |
| <i>Huwe1</i>              | chrX:148237824-148369961  | 5.42303 | 7.59928 | 0.486764 | -3.1506  | 0.00162934  | 0.0281067   |
| <i>Phgdh</i>              | chr3:98117093-98143892    | 95.0107 | 133.072 | 0.486046 | -4.15233 | 3.29E-05    | 0.00152988  |
| <i>3110001l22Rik,Bfar</i> | chr16:13671950-13703705   | 25.0524 | 35.0772 | 0.485581 | -2.97664 | 0.00291428  | 0.0420054   |
| <i>Cln3</i>               | chr8:63389185-63462108    | 3.97808 | 5.56769 | 0.485007 | -3.35043 | 0.000806856 | 0.0172609   |
| <i>Pfkm</i>               | chr15:97869174-97962878   | 25.14   | 35.1855 | 0.484997 | -3.57561 | 0.000349413 | 0.0095388   |
| <i>Cirh1a</i>             | chr8:109417539-109446994  | 33.9946 | 47.538  | 0.483776 | -3.00152 | 0.00268638  | 0.0397633   |
| <i>Csf3r</i>              | chr4:125701902-125722219  | 32.8291 | 45.8353 | 0.481485 | -5.20873 | 1.90E-07    | 2.00E-05    |
| <i>Ltbp3</i>              | chr19:5740903-5771401     | 20.5909 | 28.7436 | 0.481233 | -3.48219 | 0.000497326 | 0.0124063   |
| <i>Cd27</i>               | chr6:125174229-125189952  | 138.649 | 193.498 | 0.480876 | -4.44836 | 8.65E-06    | 0.000498293 |
| <i>Flii</i>               | chr11:60513191-60540723   | 44.1367 | 61.4087 | 0.476464 | -4.14369 | 3.42E-05    | 0.0015684   |
| <i>G6pdx</i>              | chrX:71638629-71699117    | 47.8295 | 66.5255 | 0.476006 | -3.60975 | 0.000306492 | 0.00858995  |
| <i>Gm6682</i>             | chr12:4788975-4790318     | 465.986 | 645.743 | 0.470672 | -5.83081 | 5.52E-09    | 8.29E-07    |



|                      |                           |         |         |          |          |             |             |
|----------------------|---------------------------|---------|---------|----------|----------|-------------|-------------|
| <i>Aimp2</i>         | chr5:144578660-144670708  | 94.2645 | 130.459 | 0.468815 | -3.97057 | 7.17E-05    | 0.00290182  |
| <i>Sipi</i>          | chr2:164179805-164182243  | 178.63  | 247.063 | 0.467907 | -3.63787 | 0.000274902 | 0.00789577  |
| <i>Mthfr</i>         | chr4:147413185-147433671  | 4.24276 | 5.86746 | 0.467733 | -3.23638 | 0.00121057  | 0.0229335   |
| <i>Acox1</i>         | chr11:116033196-116076632 | 26.139  | 36.1338 | 0.467144 | -3.71533 | 0.000202938 | 0.00631453  |
| <i>Mtmr9</i>         | chr14:64142446-64162790   | 53.4019 | 73.8035 | 0.466798 | -3.56626 | 0.000362118 | 0.00975853  |
| <i>Tmed5</i>         | chr5:108550665-108561610  | 20.5488 | 28.3628 | 0.464949 | -2.92916 | 0.00339874  | 0.0462804   |
| <i>Aldh18a1</i>      | chr19:40624746-40662953   | 34.0347 | 46.9574 | 0.464348 | -4.34838 | 1.37E-05    | 0.000752366 |
| <i>Plac8</i>         | chr5:100982751-101001224  | 788.977 | 1087.84 | 0.463415 | -5.33611 | 9.50E-08    | 1.11E-05    |
| <i>Tgtp2</i>         | chr11:48851161-48948889   | 35.263  | 48.4967 | 0.459731 | -3.18192 | 0.00146302  | 0.0261738   |
| <i>Maged2</i>        | chrX:147240963-147248882  | 14.6363 | 20.1113 | 0.458454 | -3.85983 | 0.000113465 | 0.00411713  |
| <i>Nnt</i>           | chr13:120123123-120197945 | 37.8795 | 52.0289 | 0.457893 | -3.57844 | 0.000345653 | 0.00945846  |
| <i>Psm2</i>          | chr16:20651724-20663487   | 37.3628 | 51.3132 | 0.457728 | -3.36545 | 0.000764178 | 0.0164718   |
| <i>Ttc3</i>          | chr16:94580369-94690828   | 11.09   | 15.2183 | 0.456552 | -2.95806 | 0.00309584  | 0.0433232   |
| <i>Sdcbp</i>         | chr4:6292826-6323269      | 119.2   | 163.387 | 0.454911 | -7.52236 | 5.37E-14    | 1.88E-11    |
| <i>2700094K13Rik</i> | chr2:84509377-84510865    | 203.263 | 278.606 | 0.45488  | -4.34107 | 1.42E-05    | 0.000763361 |
| <i>Ddx24</i>         | chr12:104646185-104664077 | 46.3517 | 63.5213 | 0.454619 | -3.58328 | 0.000339307 | 0.00939589  |
| <i>Sepr1</i>         | chr4:134093806-134108081  | 36.7802 | 50.3945 | 0.454336 | -3.47676 | 0.000507518 | 0.0125793   |
| <i>Cyfip1</i>        | chr7:63097440-63217863    | 23.1589 | 31.7173 | 0.453704 | -3.75338 | 0.000174465 | 0.00572076  |
| <i>Adnp</i>          | chr2:168006464-168032562  | 23.156  | 31.6908 | 0.452676 | -3.34002 | 0.000837715 | 0.0176622   |
| <i>Ngp</i>           | chr9:110322311-110325516  | 189.042 | 258.435 | 0.451095 | -4.05116 | 5.10E-05    | 0.00216877  |
| <i>Rbmx1</i>         | chr8:81029167-81032827    | 165.337 | 225.998 | 0.450899 | -10.7653 | 0           | 0           |
| <i>Mrps25</i>        | chr6:92041411-92134017    | 19.5681 | 26.7421 | 0.450604 | -3.37398 | 0.000740902 | 0.0162423   |
| <i>Ppil2</i>         | chr16:17070403-17111345   | 24.1365 | 32.9813 | 0.45043  | -3.87794 | 0.000105345 | 0.00389576  |
| <i>Usp1</i>          | chr5:149996135-150027010  | 12.6296 | 17.243  | 0.4492   | -4.13365 | 3.57E-05    | 0.00162068  |
| <i>Tmed7</i>         | chr18:46745581-46757189   | 25.7642 | 35.1732 | 0.449106 | -2.98676 | 0.0028195   | 0.0409996   |
| <i>Amd1</i>          | chr10:40007263-40021994   | 39.6684 | 54.1489 | 0.448942 | -3.42769 | 0.000608739 | 0.0144982   |
| <i>Abcc4</i>         | chr14:118881913-119105441 | 10.9759 | 14.9785 | 0.448558 | -3.25268 | 0.00114323  | 0.0218883   |
| <i>Scd2</i>          | chr19:44368165-44381352   | 72.9412 | 99.4457 | 0.447176 | -5.0711  | 3.96E-07    | 3.69E-05    |
| <i>Smad3</i>         | chr9:63494573-63605801    | 18.0284 | 24.5766 | 0.447013 | -3.02685 | 0.00247112  | 0.0378982   |
| <i>Stk4</i>          | chr2:16389913-163981257   | 30.176  | 41.1304 | 0.446805 | -3.72731 | 0.000193531 | 0.00612054  |
| <i>Tardbp</i>        | chr4:147976652-148001105  | 20.9859 | 28.6038 | 0.446783 | -4.65556 | 3.23E-06    | 0.000226657 |
| <i>Dapp1</i>         | chr3:137593969-137644513  | 147.627 | 201.132 | 0.446194 | -5.21856 | 1.80E-07    | 1.91E-05    |
| <i>Psm2</i>          | chr13:14705508-14717940   | 111.891 | 152.428 | 0.44604  | -2.99178 | 0.00277358  | 0.0404335   |
| <i>Abcf2</i>         | chr5:24071158-24083285    | 46.0544 | 62.694  | 0.444986 | -3.70034 | 0.000215307 | 0.00653725  |
| <i>Hspa8</i>         | chr9:40609355-40613282    | 766.962 | 1043.15 | 0.443723 | -6.6066  | 3.93E-11    | 9.29E-09    |
| <i>Sh2d3c</i>        | chr2:32576574-32610527    | 26.7996 | 36.2934 | 0.437496 | -3.55046 | 0.000384554 | 0.0101394   |
| <i>Dkc1</i>          | chrX:72341192-72376288    | 45.9764 | 62.1517 | 0.434898 | -3.3315  | 0.000863787 | 0.018015    |
| <i>Sel1l</i>         | chr12:93044482-93087597   | 15.6427 | 21.1458 | 0.434883 | -4.29824 | 1.72E-05    | 0.000897632 |
| <i>Cd97</i>          | chr8:86239075-86265210    | 27.6198 | 37.3316 | 0.434694 | -6.16426 | 7.08E-10    | 1.19E-07    |
| <i>Hmgn2</i>         | chr4:133520653-133523906  | 322.328 | 435.05  | 0.432653 | -4.73933 | 2.14E-06    | 0.000157084 |
| <i>Psm6</i>          | chr11:70338858-70341360   | 153.509 | 207.101 | 0.432017 | -3.41832 | 0.000630081 | 0.0147337   |
| <i>Abr</i>           | chr11:76230235-76391229   | 20.8785 | 28.1398 | 0.430595 | -3.09197 | 0.00198835  | 0.0324613   |
| <i>Mapre1</i>        | chr2:153567022-153599050  | 20.1958 | 27.2188 | 0.430546 | -3.52566 | 0.000422428 | 0.01089     |
| <i>Psm1</i>          | chr1:87961193-88035870    | 90.5085 | 121.895 | 0.42951  | -4.42211 | 9.77E-06    | 0.000546554 |

|                             |                           |         |         |          |          |             |             |
|-----------------------------|---------------------------|---------|---------|----------|----------|-------------|-------------|
| <i>Cmip</i>                 | chr8:119780918-119985405  | 15.9057 | 21.42   | 0.429412 | -6.18287 | 6.29E-10    | 1.12E-07    |
| <i>Acbd5</i>                | chr2:22923720-22970032    | 4.09855 | 5.51881 | 0.429244 | -3.07812 | 0.00208308  | 0.0336286   |
| <i>Hn1l</i>                 | chr17:25079414-25097568   | 52.3025 | 70.424  | 0.429188 | -3.34527 | 0.000822013 | 0.0174584   |
| <i>Vrk3</i>                 | chr7:52003998-52032884    | 69.5618 | 93.6416 | 0.428855 | -3.16027 | 0.00157622  | 0.02757     |
| <i>Nol11</i>                | chr11:107027974-107050695 | 21.7874 | 29.3241 | 0.428594 | -3.23398 | 0.00122079  | 0.0230517   |
| <i>Gle1</i>                 | chr2:29790928-29814952    | 32.8112 | 44.1287 | 0.427528 | -2.98483 | 0.00283736  | 0.0412077   |
| <i>Etnk1</i>                | chr6:143115749-143157066  | 21.1448 | 28.4314 | 0.427179 | -3.38058 | 0.000723336 | 0.0159335   |
| <i>Erb2ip</i>               | chr13:104608865-104710594 | 6.87491 | 9.24132 | 0.426759 | -4.66732 | 3.05E-06    | 0.000216694 |
| <i>Dpp3</i>                 | chr19:4907228-4928287     | 57.1596 | 76.8104 | 0.426306 | -3.4715  | 0.000517559 | 0.0127735   |
| <i>Tgm2</i>                 | chr2:157942140-157972128  | 30.936  | 41.5378 | 0.425136 | -3.07181 | 0.00212767  | 0.0340163   |
| <i>Rpl17</i>                | chr18:75160130-75163035   | 268.811 | 360.843 | 0.424782 | -3.61548 | 0.000299796 | 0.00848446  |
| <i>Prkag2</i>               | chr5:24368552-24606460    | 19.9537 | 26.7839 | 0.424711 | -5.27795 | 1.31E-07    | 1.44E-05    |
| <i>Ctsa</i>                 | chr2:164656229-164683208  | 55.9564 | 75.0823 | 0.42417  | -4.34316 | 1.40E-05    | 0.000759662 |
| <i>O610031J06Rik</i>        | chr3:88128944-88132553    | 69.1705 | 92.7481 | 0.423161 | -2.93431 | 0.00334292  | 0.0457314   |
| <i>Dnm1l</i>                | chr16:16312320-16359124   | 12.4349 | 16.6715 | 0.422982 | -6.90444 | 5.04E-12    | 1.33E-09    |
| <i>Trub2</i>                | chr2:29631630-29643191    | 27.0957 | 36.2476 | 0.419823 | -3.17791 | 0.0014834   | 0.0262544   |
| <i>S100a9</i>               | chr3:90496554-90499613    | 685.353 | 915.681 | 0.417998 | -3.92478 | 8.68E-05    | 0.00338325  |
| <i>Hadh</i>                 | chr3:130936341-130974955  | 91.5684 | 122.267 | 0.417118 | -3.38768 | 0.000704858 | 0.0157275   |
| <i>Parvg</i>                | chr15:84155149-84173408   | 97.1769 | 129.549 | 0.414807 | -4.06265 | 4.85E-05    | 0.00207998  |
| <i>Axin1</i>                | chr17:26275630-26332756   | 15.6032 | 20.7984 | 0.414629 | -4.86873 | 1.12E-06    | 9.03E-05    |
| <i>Maged1</i>               | chrX:91780812-91787413    | 39.5863 | 52.7445 | 0.414019 | -2.96595 | 0.0030175   | 0.0429613   |
| <i>Wbp1</i>                 | chr6:83069037-83071455    | 68.7627 | 91.5447 | 0.412851 | -6.93831 | 3.97E-12    | 1.15E-09    |
| <i>Calm2</i>                | chr17:87832740-87846275   | 197.707 | 263.14  | 0.41247  | -3.83167 | 0.000127276 | 0.00449153  |
| <i>Eif1a</i>                | chr18:46757357-46769879   | 47.8271 | 63.5442 | 0.409931 | -3.21265 | 0.00131517  | 0.0244352   |
| <i>Gtpbp4</i>               | chr13:8971723-8995258     | 44.0672 | 58.5023 | 0.408788 | -2.95292 | 0.00314779  | 0.0437721   |
| <i>Fkbp5</i>                | chr17:28536039-28623057   | 32.8084 | 43.5419 | 0.40834  | -2.99958 | 0.00270352  | 0.039864    |
| <i>Mrpl18</i>               | chr17:13104220-13108957   | 160.995 | 213.563 | 0.407647 | -3.15919 | 0.00158207  | 0.027579    |
| <i>Trnt1</i>                | chr6:106719131-106750081  | 16.4212 | 21.7709 | 0.406838 | -3.67355 | 0.000239206 | 0.00704532  |
| <i>2900097C17Rik</i>        | chr2:156213798-156218715  | 29.6501 | 39.3091 | 0.406827 | -3.28847 | 0.00100734  | 0.020173    |
| <i>Galnt1</i>               | chr18:24363844-24445317   | 26.3776 | 34.9    | 0.403915 | -3.34701 | 0.000816873 | 0.0174131   |
| <i>Capg</i>                 | chr6:72494384-72512977    | 105.319 | 139.331 | 0.403747 | -3.0098  | 0.00261421  | 0.0392081   |
| <i>Eif4a1</i>               | chr11:69480437-69485925   | 80.9213 | 106.672 | 0.398588 | -3.38562 | 0.000710177 | 0.0157477   |
| <i>Yipf2</i>                | chr9:21351337-21400414    | 24.1903 | 31.8616 | 0.397389 | -3.4083  | 0.000653697 | 0.0150615   |
| <i>Hspa5</i>                | chr2:34627609-34632049    | 218.101 | 287.231 | 0.397217 | -6.57518 | 4.86E-11    | 1.10E-08    |
| <i>Adk</i>                  | chr14:21871795-22267791   | 41.7018 | 54.884  | 0.396277 | -4.77924 | 1.76E-06    | 0.000132905 |
| <i>Hnrnpab</i>              | chr11:51398258-51420383   | 89.2813 | 117.244 | 0.393084 | -7.27777 | 3.39E-13    | 1.06E-10    |
| <i>Srp54a,Srp54b,Srp54c</i> | chr12:56256090-56365681   | 71.1562 | 93.3692 | 0.391958 | -3.67708 | 0.000235917 | 0.00702469  |
| <i>Vwa5a</i>                | chr9:38525852-38550922    | 17.3712 | 22.7842 | 0.391336 | -5.51577 | 3.47E-08    | 4.57E-06    |
| <i>Hsp90aa1</i>             | chr12:111929245-111934605 | 201.724 | 264.567 | 0.391249 | -4.82554 | 1.40E-06    | 0.000109942 |
| <i>Sepp1</i>                | chr15:3220766-3230508     | 158.037 | 207.102 | 0.390077 | -6.59003 | 4.40E-11    | 1.02E-08    |
| <i>Serp1nb1a</i>            | chr13:32933960-32943054   | 88.2294 | 115.574 | 0.389488 | -3.25247 | 0.00114405  | 0.0218883   |
| <i>Slain2</i>               | chr5:73305555-73370067    | 6.70474 | 8.77775 | 0.38867  | -3.30458 | 0.000951186 | 0.0192819   |
| <i>Gm1821</i>               | chr14:46703701-46704632   | 792.687 | 1037.2  | 0.387872 | -4.48214 | 7.39E-06    | 0.000443194 |
| <i>Rnpepl1</i>              | chr1:94807401-94817162    | 41.9029 | 54.826  | 0.387811 | -2.94665 | 0.0032124   | 0.0444248   |

|                 |                           |         |         |          |          |             |             |
|-----------------|---------------------------|---------|---------|----------|----------|-------------|-------------|
| <i>Tmem176b</i> | chr6:48783810-48791373    | 622.399 | 814.135 | 0.387428 | -6.16597 | 7.01E-10    | 1.19E-07    |
| <i>Gpank1</i>   | chr17:35258440-35261760   | 22.0041 | 28.781  | 0.387345 | -3.09392 | 0.00197533  | 0.0322944   |
| <i>Spop</i>     | chr11:95275396-95354724   | 48.3751 | 63.2664 | 0.387174 | -3.04739 | 0.00230839  | 0.0362054   |
| <i>Atf4</i>     | chr15:80085613-80087971   | 160.3   | 209.642 | 0.387152 | -3.82948 | 0.000128412 | 0.00451785  |
| <i>Lman2</i>    | chr13:55445193-55464144   | 59.3866 | 77.6491 | 0.386831 | -3.8015  | 0.000143823 | 0.00490385  |
| <i>Mospd3</i>   | chr5:138037874-138042268  | 143.512 | 187.067 | 0.382384 | -3.33561 | 0.000851109 | 0.0178471   |
| <i>Mef2c</i>    | chr13:83643032-83806684   | 10.0731 | 13.1143 | 0.38063  | -4.14299 | 3.43E-05    | 0.0015684   |
| <i>Dnpep</i>    | chr1:75305139-75314212    | 83.956  | 109.23  | 0.379662 | -3.57433 | 0.000351131 | 0.00955017  |
| <i>U2surp</i>   | chr9:95357312-95412415    | 4.49915 | 5.84505 | 0.377562 | -3.04229 | 0.00234788  | 0.0364788   |
| <i>Rpl9</i>     | chr5:65779602-65782670    | 234.513 | 304.479 | 0.376674 | -2.93877 | 0.00329513  | 0.0452983   |
| <i>Gps1</i>     | chr11:120645585-120650416 | 22.1407 | 28.7417 | 0.376446 | -3.72979 | 0.00019164  | 0.00609404  |
| <i>Idh3a</i>    | chr9:54434317-54452469    | 71.1331 | 92.3212 | 0.37614  | -3.16994 | 0.00152472  | 0.0268217   |
| <i>Abhd14a</i>  | chr9:106342381-106350009  | 41.2663 | 53.4592 | 0.373475 | -3.70741 | 0.000209393 | 0.00645016  |
| <i>Hn1</i>      | chr11:115358666-115375684 | 312.972 | 405.439 | 0.373451 | -4.15748 | 3.22E-05    | 0.00150183  |
| <i>Ctse</i>     | chr1:133534890-133572084  | 145.412 | 188.357 | 0.37332  | -3.8418  | 0.000122136 | 0.00436334  |
| <i>Pphln1</i>   | chr15:93228780-93322343   | 8.93811 | 11.5724 | 0.372652 | -2.96911 | 0.0029866   | 0.0425738   |
| <i>Rftn1</i>    | chr17:50132631-50329822   | 59.1251 | 76.5342 | 0.372334 | -3.11711 | 0.00182632  | 0.0303802   |
| <i>Etv6</i>     | chr6:133985724-134220165  | 32.0409 | 41.4338 | 0.370891 | -3.21933 | 0.00128492  | 0.0239886   |
| <i>Eif4a2</i>   | chr16:23107551-23127803   | 78.913  | 101.797 | 0.367354 | -4.11197 | 3.92E-05    | 0.00173786  |
| <i>Muc13</i>    | chr16:33794122-33820013   | 114.976 | 148.283 | 0.367029 | -3.91867 | 8.90E-05    | 0.00343537  |
| <i>Eif6</i>     | chr2:155645572-155652661  | 126.586 | 163.088 | 0.36553  | -3.13805 | 0.00170074  | 0.0289927   |
| <i>Edem2</i>    | chr2:155527408-155555211  | 71.1794 | 91.6237 | 0.364262 | -3.01871 | 0.00253849  | 0.0386619   |
| <i>Pcna</i>     | chr2:132075021-132078916  | 414.874 | 533.238 | 0.362108 | -4.25465 | 2.09E-05    | 0.00104858  |
| <i>Dcun1d1</i>  | chr3:35791026-35831888    | 14.9104 | 19.1631 | 0.362014 | -8.10314 | 4.44E-16    | 1.98E-13    |
| <i>Ctnnd1</i>   | chr2:84440937-84490897    | 8.89643 | 11.43   | 0.361526 | -4.28369 | 1.84E-05    | 0.000949855 |
| <i>P2ry14</i>   | chr3:58810899-59148178    | 23.9177 | 30.7248 | 0.361326 | -3.29793 | 0.000974015 | 0.0196415   |
| <i>Rangap1</i>  | chr15:81534677-81560349   | 102.184 | 131.252 | 0.361171 | -3.99909 | 6.36E-05    | 0.00263801  |
| <i>Snrpa</i>    | chr7:27972024-27989339    | 84.7622 | 108.764 | 0.359708 | -3.80112 | 0.000144044 | 0.00490385  |
| <i>Ddx17</i>    | chr15:79346837-79377171   | 55.9205 | 71.6306 | 0.357199 | -3.57952 | 0.000344221 | 0.00944159  |
| <i>Cdc45</i>    | chr16:18780539-18812065   | 31.7117 | 40.6047 | 0.356632 | -3.10162 | 0.00192465  | 0.0315998   |
| <i>Arhgap19</i> | chr19:41841077-41876574   | 5.97212 | 7.64324 | 0.35594  | -3.00529 | 0.00265326  | 0.0394396   |
| <i>Nars</i>     | chr18:64659300-64676211   | 46.8625 | 59.8093 | 0.351937 | -4.68219 | 2.84E-06    | 0.000204055 |
| <i>Kpnb1</i>    | chr11:97021023-97049206   | 43.6562 | 55.7086 | 0.351712 | -3.45805 | 0.000544103 | 0.0132884   |
| <i>Psmc7</i>    | chr8:110104279-110112382  | 122.639 | 156.38  | 0.350636 | -3.05149 | 0.00227707  | 0.0359088   |
| <i>Matr3</i>    | chr18:35721811-35751699   | 37.9085 | 48.3186 | 0.350059 | -2.9814  | 0.0028693   | 0.0415672   |
| <i>Cdc42</i>    | chr4:136875610-136913674  | 179.072 | 228.092 | 0.349077 | -3.86149 | 0.000112696 | 0.00410208  |
| <i>Ica1</i>     | chr6:8580526-8728484      | 28.8289 | 36.6928 | 0.347981 | -3.28292 | 0.00102737  | 0.0205345   |
| <i>Eif5</i>     | chr12:112776311-112784964 | 32.0407 | 40.7736 | 0.347732 | -3.54445 | 0.000393439 | 0.0102962   |
| <i>Srsf3</i>    | chr17:29169604-29180317   | 94.3522 | 120.025 | 0.347211 | -3.7474  | 0.000178675 | 0.00578164  |
| <i>Mmrn1</i>    | chr6:60894310-60939372    | 15.893  | 20.2039 | 0.346248 | -3.80138 | 0.00014389  | 0.00490385  |
| <i>Ubqln1</i>   | chr13:58277516-58317014   | 13.8101 | 17.5457 | 0.345393 | -3.9614  | 7.45E-05    | 0.00298439  |
| <i>Ltf</i>      | chr9:110921795-110945270  | 101.392 | 128.791 | 0.345087 | -3.45554 | 0.000549192 | 0.0133548   |
| <i>Apex1</i>    | chr14:51544623-51550524   | 199.846 | 253.73  | 0.344406 | -3.26326 | 0.00110139  | 0.0213187   |
| <i>Ghitm</i>    | chr14:37933631-37948508   | 84.6093 | 107.093 | 0.339971 | -4.86909 | 1.12E-06    | 9.03E-05    |

|                 |                           |         |         |          |          |             |             |
|-----------------|---------------------------|---------|---------|----------|----------|-------------|-------------|
| <i>Ptp4a2</i>   | chr4:129497722-129527247  | 58.4764 | 73.9942 | 0.339557 | -8.42691 | 0           | 0           |
| <i>Cdc42se2</i> | chr11:54530916-54601205   | 69.0496 | 87.2706 | 0.337862 | -3.11595 | 0.00183353  | 0.0304492   |
| <i>Eftud2</i>   | chr11:102699785-102742289 | 46.5773 | 58.8536 | 0.337503 | -4.30034 | 1.71E-05    | 0.000893187 |
| <i>Hp1bp3</i>   | chr4:137772541-137799085  | 60.9616 | 76.8881 | 0.334858 | -3.24643 | 0.00116861  | 0.0222844   |
| <i>Ncor1</i>    | chr11:62094974-62270834   | 12.9077 | 16.2705 | 0.334019 | -3.85214 | 0.000117092 | 0.00423109  |
| <i>Pecam1</i>   | chr11:106515531-106576595 | 23.7436 | 29.8746 | 0.331378 | -4.60623 | 4.10E-06    | 0.000272767 |
| <i>Tbc1d7</i>   | chr13:43247108-43266870   | 35.4059 | 44.5336 | 0.330905 | -2.97901 | 0.00289179  | 0.0418407   |
| <i>Tgfbr2</i>   | chr9:115996812-116084481  | 28.0117 | 35.1777 | 0.328632 | -4.42568 | 9.61E-06    | 0.00054526  |
| <i>Map4</i>     | chr9:109834277-109986458  | 6.24407 | 7.83114 | 0.326734 | -3.81903 | 0.000133975 | 0.00464299  |
| <i>Glyr1</i>    | chr16:5013994-5050003     | 25.2244 | 31.5627 | 0.323399 | -3.42319 | 0.000618914 | 0.0145691   |
| <i>Trp53</i>    | chr11:69393860-69405375   | 168.36  | 210.493 | 0.322216 | -3.62258 | 0.00029168  | 0.008275    |
| <i>Cand1</i>    | chr10:118635867-118677111 | 26.3878 | 32.9702 | 0.321292 | -2.99609 | 0.00273463  | 0.0402202   |
| <i>Gspt1</i>    | chr16:11203475-11254418   | 20.6786 | 25.7722 | 0.317676 | -4.84861 | 1.24E-06    | 9.93E-05    |
| <i>Zfp36l2</i>  | chr17:84583268-84587287   | 102.078 | 127.089 | 0.31617  | -3.44048 | 0.000580688 | 0.0139251   |
| <i>Tbc1d9b</i>  | chr11:49944861-49986287   | 45.4841 | 56.4937 | 0.31273  | -2.99329 | 0.0027599   | 0.0403134   |
| <i>Srrt</i>     | chr5:137736931-137748902  | 49.3017 | 61.2304 | 0.312611 | -5.49116 | 3.99E-08    | 5.19E-06    |
| <i>Ppp2r5c</i>  | chr12:111685388-111821271 | 52.4691 | 65.1249 | 0.31174  | -3.8067  | 0.000140835 | 0.00485169  |
| <i>Psmc6</i>    | chr12:56499811-56519446   | 321.032 | 398.32  | 0.311208 | -3.11335 | 0.00184974  | 0.0306359   |
| <i>H3f3b</i>    | chr11:115883274-115885818 | 356.514 | 442.041 | 0.310223 | -3.97803 | 6.95E-05    | 0.00282218  |
| <i>Ralgds</i>   | chr2:28368686-28408602    | 13.2906 | 16.4721 | 0.309626 | -3.05403 | 0.00225792  | 0.0357041   |
| <i>Sin3b</i>    | chr8:75247186-75282102    | 267.509 | 331.515 | 0.309486 | -2.96501 | 0.00302669  | 0.0430393   |
| <i>Ly6e</i>     | chr15:74785480-74790335   | 630.97  | 781.488 | 0.308652 | -7.56421 | 3.91E-14    | 1.46E-11    |
| <i>Pglyrp2</i>  | chr17:32549405-32561112   | 48.8863 | 60.4944 | 0.307372 | -7.64713 | 2.07E-14    | 8.24E-12    |
| <i>G3bp1</i>    | chr11:55283253-55314389   | 91.3293 | 112.976 | 0.306867 | -2.93125 | 0.00337599  | 0.0460272   |
| <i>Oat</i>      | chr7:139749157-139768081  | 123.293 | 152.516 | 0.306866 | -2.99407 | 0.00275282  | 0.0403134   |
| <i>Anp32e</i>   | chr3:95733179-95751310    | 37.2089 | 46.019  | 0.306579 | -5.03332 | 4.82E-07    | 4.33E-05    |
| <i>Wdr61</i>    | chr9:54564961-54582335    | 53.7921 | 66.4943 | 0.305836 | -3.27369 | 0.00106152  | 0.0210036   |
| <i>Tuba1a</i>   | chr15:98780277-98783932   | 376.304 | 464.218 | 0.302904 | -3.70786 | 0.000209016 | 0.00645016  |
| <i>Anxa6</i>    | chr11:54792463-54846973   | 38.3962 | 47.1286 | 0.295637 | -4.14449 | 3.41E-05    | 0.0015684   |
| <i>Nmi</i>      | chr2:51804018-51828728    | 30.0429 | 36.8509 | 0.294678 | -3.79059 | 0.000150293 | 0.00507183  |
| <i>Myo9b</i>    | chr8:73796612-73884611    | 10.8337 | 13.2837 | 0.294128 | -3.22081 | 0.0012783   | 0.0239422   |
| <i>Hk1</i>      | chr10:61731602-61842656   | 30.674  | 37.5732 | 0.292686 | -4.46908 | 7.86E-06    | 0.000461578 |
| <i>Ncoa4</i>    | chr14:32973077-32992549   | 58.627  | 71.8132 | 0.292684 | -2.97578 | 0.00292243  | 0.0420054   |
| <i>Hsd3b7</i>   | chr7:134944122-134947316  | 123.452 | 151.149 | 0.292014 | -4.42367 | 9.70E-06    | 0.00054526  |
| <i>Mapk14</i>   | chr17:28828286-28885350   | 72.1765 | 88.2454 | 0.289992 | -3.04612 | 0.00231813  | 0.0362599   |
| <i>Rnps1</i>    | chr17:24551619-24562842   | 75.4196 | 92.1139 | 0.288479 | -4.47094 | 7.79E-06    | 0.000459904 |
| <i>Cad</i>      | chr5:31357183-31380852    | 46.0069 | 56.1115 | 0.286445 | -3.04009 | 0.00236505  | 0.0366963   |
| <i>Cct7</i>     | chr6:85396778-85418471    | 291.549 | 355.089 | 0.284442 | -3.65276 | 0.00025944  | 0.00756427  |
| <i>Eif5a</i>    | chr11:69730213-69735460   | 791.362 | 963.203 | 0.283502 | -9.13763 | 0           | 0           |
| <i>Ruvbl2</i>   | chr7:52677267-52689834    | 289.69  | 352.162 | 0.281731 | -3.26239 | 0.00110476  | 0.021333    |
| <i>Hsp90b1</i>  | chr10:86153585-86168189   | 189.891 | 230.716 | 0.280947 | -3.36602 | 0.000762619 | 0.0164689   |
| <i>Idh3g</i>    | chrX:71024301-71032236    | 335.85  | 406.565 | 0.27567  | -3.1006  | 0.00193132  | 0.0316643   |
| <i>Gpbp1</i>    | chr13:112215887-112280249 | 26.8526 | 32.4773 | 0.274367 | -3.41382 | 0.000640596 | 0.0149024   |
| <i>Fut8</i>     | chr12:78339090-78576983   | 129.221 | 156.2   | 0.273545 | -6.32075 | 2.60E-10    | 5.02E-08    |

|                             |                           |         |         |            |          |             |             |
|-----------------------------|---------------------------|---------|---------|------------|----------|-------------|-------------|
| <i>Lsp1</i>                 | chr7:149646716-149701914  | 57.0398 | 68.9194 | 0.272941   | -3.48657 | 0.000489264 | 0.0122581   |
| <i>Rpl7a</i>                | chr2:26766326-26768831    | 596.202 | 719.248 | 0.27069    | -3.08806 | 0.00201471  | 0.0327992   |
| <i>Slc29a1</i>              | chr17:45722148-45736552   | 135.888 | 163.79  | 0.269432   | -6.11641 | 9.57E-10    | 1.54E-07    |
| <i>Ubc</i>                  | chr5:125866334-125870387  | 616.041 | 739.591 | 0.263702   | -3.88706 | 0.000101465 | 0.00377638  |
| <i>Ctbp1</i>                | chr5:33590371-33617653    | 92.3711 | 110.429 | 0.257606   | -5.18488 | 2.16E-07    | 2.21E-05    |
| <i>Ifi47,Olfr56</i>         | chr11:48851161-48948889   | 125.388 | 149.751 | 0.256172   | -2.96967 | 0.00298118  | 0.0425489   |
| <i>Camk2g</i>               | chr14:21554096-21613310   | 15.3529 | 18.2367 | 0.248332   | -2.93399 | 0.00334639  | 0.0457314   |
| <i>Laptm5</i>               | chr4:130469248-130492063  | 328.905 | 390.681 | 0.248321   | -3.27018 | 0.00107479  | 0.0210979   |
| <i>Zscan21</i>              | chr5:138558132-138575487  | 12.3699 | 14.6469 | 0.243756   | -3.63723 | 0.000275588 | 0.00789587  |
| <i>Canx</i>                 | chr11:50107458-50139175   | 35.123  | 41.4713 | 0.239696   | -4.27556 | 1.91E-05    | 0.000976474 |
| <i>Mcm3</i>                 | chr1:20793094-20810294    | 214.442 | 251.96  | 0.232608   | -2.89992 | 0.00373256  | 0.0494329   |
| <i>Irak1,Mir5132,Mir718</i> | chrX:71259252-71269275    | 33.0055 | 38.4822 | 0.221485   | -3.62666 | 0.00028711  | 0.00818547  |
| <i>Vrk1</i>                 | chr12:107248472-107315620 | 29.8112 | 34.6177 | 0.215657   | -3.7275  | 0.000193388 | 0.00612054  |
| <i>Stat3</i>                | chr11:100748123-100800825 | 37.7289 | 43.7703 | 0.214284   | -5.08084 | 3.76E-07    | 3.57E-05    |
| <i>Tuba1b</i>               | chr15:98761861-98764821   | 2483.24 | 2874.95 | 0.211316   | -3.38236 | 0.000718662 | 0.015875    |
| <i>Ranbp3</i>               | chr17:56812647-56851192   | 38.6672 | 44.7033 | 0.20927    | -4.8893  | 1.01E-06    | 8.31E-05    |
| <i>Slc3a2</i>               | chr19:8781371-8797859     | 218.74  | 252.258 | 0.205686   | -3.04617 | 0.00231778  | 0.0362599   |
| <i>Orc3</i>                 | chr4:34497863-34562191    | 15.2711 | 17.6063 | 0.205293   | -3.15979 | 0.00157884  | 0.02757     |
| <i>Casp8</i>                | chr1:58852217-58904347    | 78.2366 | 90.0266 | 0.202509   | -3.3849  | 0.000712032 | 0.0157586   |
| <i>Ndufs1</i>               | chr1:63161044-63223396    | 73.9649 | 85.0817 | 0.202009   | -3.6468  | 0.000265526 | 0.00768366  |
| <i>Kit</i>                  | chr5:75971011-76052746    | 85.0309 | 97.435  | 0.196453   | -3.78484 | 0.000153806 | 0.0051603   |
| <i>Cbfb</i>                 | chr8:107694573-107741888  | 50.2826 | 57.5463 | 0.194663   | -4.18252 | 2.88E-05    | 0.00136765  |
| <i>Pqlc1</i>                | chr18:80451983-80489463   | 80.7988 | 92.4647 | 0.194569   | -5.45568 | 4.88E-08    | 5.94E-06    |
| <i>Cnot1</i>                | chr8:98243350-98345628    | 14.6992 | 16.8053 | 0.193176   | -3.4721  | 0.000516407 | 0.0127723   |
| <i>Dntt</i>                 | chr19:41103764-41134015   | 306.307 | 350.159 | 0.193031   | -2.97503 | 0.00292962  | 0.0420054   |
| <i>Traf7</i>                | chr17:24625727-24664883   | 95.2688 | 108.276 | 0.184633   | -3.81237 | 0.000137638 | 0.0047557   |
| <i>Ciz1</i>                 | chr2:32218529-32233833    | 35.8563 | 40.7198 | 0.183505   | -3.05174 | 0.00227517  | 0.0359088   |
| <i>Mbnl1</i>                | chr3:60276751-60433670    | 39.5308 | 44.892  | 0.183479   | -5.05099 | 4.40E-07    | 4.04E-05    |
| <i>Gtf2ird1</i>             | chr5:134833530-134932586  | 12.8247 | 14.5242 | 0.179531   | -4.87185 | 1.11E-06    | 9.01E-05    |
| <i>BC017643</i>             | chr11:121038906-121090623 | 85.7565 | 94.9732 | 0.147275   | -4.57893 | 4.67E-06    | 0.000302217 |
| <i>Hnrnpd</i>               | chr5:100384954-100407957  | 19.6751 | 21.3989 | 0.121168   | -3.73541 | 0.00018741  | 0.00597594  |
| <i>Gpr56</i>                | chr8:97501008-97538108    | 640.133 | 691.888 | 0.112168   | -6.36227 | 1.99E-10    | 3.97E-08    |
| <i>Txnip</i>                | chr3:96359690-96370724    | 240.057 | 259.349 | 0.111519   | -3.4292  | 0.000605368 | 0.0144477   |
| <i>Acot7</i>                | chr4:151552208-151645964  | 245.802 | 260.603 | 0.0843548  | -3.02962 | 0.00244862  | 0.0376899   |
| <i>Arhgef1</i>              | chr7:25688004-25711610    | 61.8801 | 59.1126 | -0.066009  | 3.45802  | 0.000544165 | 0.0132884   |
| <i>Tpd52</i>                | chr3:8929435-9004515      | 53.3153 | 50.0806 | -0.0902979 | 2.94505  | 0.00322902  | 0.0445481   |
| <i>Npm1</i>                 | chr11:33052497-33063206   | 802.163 | 745.598 | -0.105498  | 3.05484  | 0.00225182  | 0.0356564   |
| <i>Atp13a2</i>              | chr4:140542787-140563616  | 109.233 | 100.076 | -0.126308  | 2.92601  | 0.00343339  | 0.0465903   |
| <i>Anapc5</i>               | chr5:123237469-123271348  | 354.756 | 323.709 | -0.132129  | 4.45207  | 8.50E-06    | 0.000492214 |
| <i>Eef1a1</i>               | chr9:78326260-78329531    | 19600.7 | 17787.1 | -0.140074  | 3.96262  | 7.41E-05    | 0.00297944  |
| <i>Psap</i>                 | chr10:59740375-59765348   | 140.104 | 127.035 | -0.141273  | 4.45797  | 8.27E-06    | 0.000483687 |
| <i>Kat5</i>                 | chr19:5603013-5610094     | 40.709  | 36.2668 | -0.166699  | 2.93517  | 0.00333369  | 0.0456657   |
| <i>Rps24</i>                | chr14:25309902-25315368   | 1713.49 | 1513.54 | -0.179014  | 6.00096  | 1.96E-09    | 3.07E-07    |
| <i>Pgam5</i>                | chr5:110688153-110698918  | 73.7181 | 65.0037 | -0.181498  | 3.42612  | 0.000612265 | 0.0145225   |

|                             |                           |         |         |           |         |             |            |
|-----------------------------|---------------------------|---------|---------|-----------|---------|-------------|------------|
| <i>Fkbp8</i>                | chr8:73051641-73059227    | 293.07  | 258.373 | -0.181791 | 3.06281 | 0.00219268  | 0.0348152  |
| <i>Dut</i>                  | chr2:125072983-125084785  | 217.941 | 191.738 | -0.184798 | 3.53774 | 0.000403563 | 0.0104972  |
| <i>Wdr36</i>                | chr18:32823295-33026074   | 45.5288 | 40.0428 | -0.185238 | 2.99342 | 0.0027587   | 0.0403134  |
| <i>Snx5</i>                 | chr2:144075858-144096638  | 155.033 | 136.026 | -0.188696 | 4.11278 | 3.91E-05    | 0.00173786 |
| <i>Stau1</i>                | chr2:166773641-166821778  | 47.0283 | 41.0741 | -0.195299 | 3.4804  | 0.000500665 | 0.0124435  |
| <i>Cuta</i>                 | chr17:27074916-27076423   | 340.849 | 297.657 | -0.195483 | 3.40099 | 0.000671423 | 0.0152202  |
| <i>Rps2</i>                 | chr17:24857007-24858872   | 2534.32 | 2211.8  | -0.196375 | 3.01653 | 0.00255682  | 0.0388388  |
| <i>Tmem219</i>              | chr7:134029732-134041792  | 121.115 | 105.555 | -0.198381 | 3.01154 | 0.00259926  | 0.0392081  |
| <i>Wdr89</i>                | chr12:76731580-76770524   | 1466.65 | 1277.04 | -0.199728 | 3.282   | 0.00103072  | 0.0205345  |
| <i>Mpl</i>                  | chr4:118115021-118130100  | 167.462 | 145.763 | -0.200205 | 6.38001 | 1.77E-10    | 3.66E-08   |
| <i>Fau</i>                  | chr19:6057887-6059524     | 772.695 | 672.056 | -0.201318 | 3.22636 | 0.00125376  | 0.0235842  |
| <i>Tagln2</i>               | chr1:174430376-174437506  | 1656.77 | 1440.09 | -0.202217 | 3.09445 | 0.0019718   | 0.0322823  |
| <i>Mcm6</i>                 | chr1:130228167-130256233  | 669.828 | 581.288 | -0.204538 | 3.1029  | 0.00191637  | 0.0315265  |
| <i>Rps19</i>                | chr7:25669732-25674821    | 3049.51 | 2642.23 | -0.206817 | 3.01106 | 0.00260335  | 0.0392081  |
| <i>Cdk2</i>                 | chr10:128134994-128142107 | 68.4247 | 59.2743 | -0.207111 | 3.54421 | 0.000393793 | 0.0102962  |
| <i>Eef1b2</i>               | chr1:63223404-63227060    | 2321.62 | 2009.7  | -0.208152 | 3.41229 | 0.000644199 | 0.0149431  |
| <i>Rpsa</i>                 | chr9:120036883-120041487  | 2263.14 | 1957.88 | -0.209034 | 3.39187 | 0.00069417  | 0.015602   |
| <i>H2-D1,H2-L,LOC547349</i> | chr17:35400038-35462354   | 2226.35 | 1923.09 | -0.211253 | 3.43288 | 0.000597216 | 0.0142826  |
| <i>Osbp19</i>               | chr4:108673409-108874877  | 62.4565 | 53.918  | -0.212087 | 3.37175 | 0.000746912 | 0.0163123  |
| <i>Rpl5</i>                 | chr5:108329546-108416096  | 1065.79 | 915.061 | -0.219983 | 3.37482 | 0.000738647 | 0.0162236  |
| <i>Gnb2l1</i>               | chr11:48613861-48619743   | 14118.5 | 12118.7 | -0.22036  | 3.32066 | 0.000898058 | 0.0183983  |
| <i>Rnf14</i>                | chr18:38456288-38477503   | 45.1001 | 38.7003 | -0.220787 | 3.68058 | 0.000232705 | 0.0069601  |
| <i>Oaz1</i>                 | chr10:80289400-80292035   | 1476.95 | 1263.74 | -0.224924 | 3.24436 | 0.00117713  | 0.02241    |
| <i>Gdi2</i>                 | chr13:3537320-3610354     | 553.504 | 473.498 | -0.225233 | 3.27002 | 0.0010754   | 0.0210979  |
| <i>Rps18</i>                | chr17:34088943-34092586   | 3450.91 | 2951.97 | -0.2253   | 3.19991 | 0.00137472  | 0.0249802  |
| <i>Zfand2b</i>              | chr1:75165219-75168200    | 84.1626 | 71.9884 | -0.225415 | 4.14299 | 3.43E-05    | 0.0015684  |
| <i>Srsf11</i>               | chr3:157673456-157699603  | 90.5852 | 76.9949 | -0.234512 | 6.3647  | 1.96E-10    | 3.97E-08   |
| <i>Rpl8</i>                 | chr15:76734500-76736748   | 10461.2 | 8883.03 | -0.23592  | 3.86574 | 0.000110752 | 0.00404402 |
| <i>Rps5</i>                 | chr7:13507659-13512035    | 18056   | 15331.7 | -0.235962 | 3.70657 | 0.000210083 | 0.00645016 |
| <i>Hsp90ab1</i>             | chr17:45704726-45710210   | 2915.33 | 2471.65 | -0.238185 | 3.9132  | 9.11E-05    | 0.00349096 |
| <i>C330021F23Rik</i>        | chr8:3567997-3584776      | 489.698 | 415.008 | -0.238754 | 3.04866 | 0.00229865  | 0.0361016  |
| <i>Rps8</i>                 | chr4:116826440-116828737  | 2970.91 | 2517.56 | -0.238879 | 3.58063 | 0.00034277  | 0.00943531 |
| <i>Eif3h</i>                | chr15:51618108-51697007   | 1106.76 | 937.808 | -0.238983 | 3.36803 | 0.000757073 | 0.0164103  |
| <i>Klhdc3</i>               | chr17:46811499-46817879   | 128.916 | 109.233 | -0.239024 | 3.40383 | 0.000664472 | 0.015174   |
| <i>Mfge8</i>                | chr7:86278653-86293946    | 191.135 | 161.656 | -0.241661 | 3.25615 | 0.00112933  | 0.0217142  |
| <i>Ppib</i>                 | chr9:65907975-65917538    | 679.684 | 574.055 | -0.243677 | 2.90091 | 0.00372078  | 0.0493333  |
| <i>Rpl35a</i>               | chr16:33056538-33060274   | 696.015 | 587.736 | -0.24395  | 5.04803 | 4.46E-07    | 4.07E-05   |
| <i>Vim</i>                  | chr2:13495937-13504453    | 1439.31 | 1214.77 | -0.2447   | 3.80544 | 0.000141553 | 0.00486194 |
| <i>Gm5148</i>               | chr3:37613111-37623282    | 2284.65 | 1926.88 | -0.245706 | 3.83983 | 0.00012312  | 0.00438495 |
| <i>Uba52</i>                | chr8:73032164-73034266    | 3867.48 | 3257.37 | -0.247685 | 3.51875 | 0.000433591 | 0.0111282  |
| <i>Emb</i>                  | chr13:118009379-118063222 | 388.296 | 327.036 | -0.247708 | 3.3694  | 0.00075331  | 0.0163594  |
| <i>Akr1a1</i>               | chr4:116309114-116324279  | 1460.01 | 1228.59 | -0.248982 | 3.75946 | 0.000170283 | 0.00564765 |
| <i>Tubb5</i>                | chr17:35970864-35975246   | 2289.58 | 1925.05 | -0.250185 | 4.11382 | 3.89E-05    | 0.00173786 |
| <i>Rps9</i>                 | chr7:3655642-3658499      | 7807.9  | 6563.27 | -0.25052  | 4.07511 | 4.60E-05    | 0.00199386 |

|                               |                           |         |         |           |         |             |             |
|-------------------------------|---------------------------|---------|---------|-----------|---------|-------------|-------------|
| <i>Rpl27a</i>                 | chr7:116662708-116665883  | 1311.09 | 1100.7  | -0.252345 | 3.6009  | 0.000317118 | 0.00884492  |
| <i>Tpt1</i>                   | chr14:76245062-76248110   | 3374.56 | 2828.1  | -0.254866 | 4.00336 | 6.24E-05    | 0.00261126  |
| <i>Rpl32</i>                  | chr6:115724574-115758761  | 5923.09 | 4954.85 | -0.257508 | 3.92356 | 8.72E-05    | 0.00338897  |
| <i>Cmtm7</i>                  | chr9:114665953-114691111  | 1362.85 | 1139.45 | -0.258292 | 4.07823 | 4.54E-05    | 0.00197472  |
| <i>Rbm39</i>                  | chr2:155972974-156005976  | 159.661 | 132.778 | -0.265998 | 2.95777 | 0.00309876  | 0.0433232   |
| <i>Dctd</i>                   | chr8:49184445-49227021    | 59.7028 | 49.6237 | -0.266768 | 3.1388  | 0.00169639  | 0.0289611   |
| <i>Nt5c3</i>                  | chr6:56832394-56873926    | 159.385 | 132.451 | -0.267062 | 5.59635 | 2.19E-08    | 3.02E-06    |
| <i>Os9</i>                    | chr10:126531314-126558216 | 23.2481 | 19.3192 | -0.267072 | 3.37019 | 0.00075117  | 0.0163436   |
| <i>Gnai3</i>                  | chr3:107910216-107949032  | 137.952 | 114.399 | -0.270093 | 3.00042 | 0.00269603  | 0.0398043   |
| <i>Mir5121,Rpl13a,Snord33</i> | chr7:52380932-52384115    | 2142.24 | 1775.95 | -0.270528 | 4.09847 | 4.16E-05    | 0.00183035  |
| <i>Frmd8</i>                  | chr19:5850973-5875208     | 143.261 | 118.758 | -0.270617 | 3.01777 | 0.00254643  | 0.0387318   |
| <i>Sptssa</i>                 | chr12:55746360-55757559   | 477.193 | 395.461 | -0.271036 | 3.26888 | 0.00107974  | 0.0211473   |
| <i>Wdr1</i>                   | chr5:38918051-38952834    | 174.097 | 143.849 | -0.275342 | 3.16339 | 0.00155946  | 0.0273496   |
| <i>H2afx</i>                  | chr9:44142797-44144156    | 415.354 | 343.093 | -0.275739 | 3.20005 | 0.00137405  | 0.0249802   |
| <i>Slc48a1</i>                | chr15:97614795-97674933   | 212.081 | 175.091 | -0.276506 | 3.22605 | 0.00125511  | 0.0235842   |
| <i>Rpl14</i>                  | chr9:120480633-120483770  | 2552.42 | 2106.86 | -0.276772 | 4.21951 | 2.45E-05    | 0.00118574  |
| <i>Rpl26</i>                  | chr11:68715067-68718036   | 4528.91 | 3731.68 | -0.279337 | 4.16821 | 3.07E-05    | 0.00144453  |
| <i>Zfp207</i>                 | chr11:80196780-80219375   | 367.152 | 302.343 | -0.280189 | 6.34524 | 2.22E-10    | 4.36E-08    |
| <i>Tpm1</i>                   | chr9:66870399-66897020    | 133.276 | 109.621 | -0.281895 | 3.14603 | 0.00165505  | 0.0284231   |
| <i>Ucp2</i>                   | chr7:107641853-107650682  | 487.596 | 400.963 | -0.282218 | 4.30278 | 1.69E-05    | 0.000887419 |
| <i>Gm13826</i>                | chr5:115552930-115560277  | 5636.76 | 4626.94 | -0.284809 | 4.52206 | 6.12E-06    | 0.000379071 |
| <i>Slc43a2</i>                | chr11:75345195-75391074   | 10.2588 | 8.41818 | -0.28528  | 5.08572 | 3.66E-07    | 3.50E-05    |
| <i>Rpl23</i>                  | chr11:97638839-97643753   | 731.896 | 600.334 | -0.285874 | 3.56191 | 0.000368161 | 0.0098645   |
| <i>Tk2</i>                    | chr8:106750590-106772458  | 38.7853 | 31.8067 | -0.286179 | 3.71994 | 0.000199274 | 0.00623682  |
| <i>Rpl4</i>                   | chr9:64021193-64026369    | 7926.62 | 6498.41 | -0.286617 | 4.5995  | 4.24E-06    | 0.000280119 |
| <i>Kdelr1</i>                 | chr7:53128209-53139096    | 244.265 | 200.136 | -0.287464 | 2.96131 | 0.00306336  | 0.0432419   |
| <i>Dap</i>                    | chr15:31154139-31204093   | 247.153 | 201.725 | -0.29302  | 2.99307 | 0.00276186  | 0.0403134   |
| <i>Mrpl15</i>                 | chr1:4763278-4775807      | 50.3383 | 40.935  | -0.298322 | 3.01154 | 0.00259924  | 0.0392081   |
| <i>Rps15a</i>                 | chr7:125247889-125259661  | 108.549 | 88.2442 | -0.298776 | 3.54928 | 0.000386289 | 0.010162    |
| <i>Sod1</i>                   | chr16:90220986-90226569   | 920.777 | 747.712 | -0.300368 | 3.36665 | 0.000760869 | 0.0164618   |
| <i>Fgfr1op2</i>               | chr6:146526432-146547720  | 112.705 | 91.4759 | -0.301081 | 3.00654 | 0.00264238  | 0.0394396   |
| <i>Psbm2</i>                  | chr4:126354886-126386959  | 498.058 | 404     | -0.301956 | 3.11844 | 0.00181809  | 0.0303234   |
| <i>Tmem106c</i>               | chr15:97794659-97800717   | 105.783 | 85.7279 | -0.303272 | 2.97855 | 0.00289618  | 0.0418518   |
| <i>Plec</i>                   | chr15:76001403-76061808   | 14.6741 | 11.8876 | -0.303818 | 3.21098 | 0.00132285  | 0.0245048   |
| <i>Rpl36</i>                  | chr17:56752817-56753669   | 1257.3  | 1017.85 | -0.304806 | 3.00483 | 0.00265731  | 0.0394396   |
| <i>Zfp68</i>                  | chr5:139044879-139060971  | 27.8314 | 22.5208 | -0.305458 | 5.29759 | 1.17E-07    | 1.31E-05    |
| <i>Rplp1</i>                  | chr9:61761089-61762317    | 10935.4 | 8841.6  | -0.306627 | 4.94214 | 7.73E-07    | 6.53E-05    |
| <i>Rcsd1</i>                  | chr1:167579075-167638225  | 57.325  | 46.2255 | -0.310475 | 5.75334 | 8.75E-09    | 1.25E-06    |
| <i>Rpl30</i>                  | chr15:34370262-34373031   | 531.758 | 428.676 | -0.310882 | 4.02305 | 5.74E-05    | 0.00241807  |
| <i>H2-Ab1</i>                 | chr17:34400171-34406363   | 400.298 | 321.936 | -0.3143   | 3.44066 | 0.000580302 | 0.0139251   |
| <i>Pdk3</i>                   | chrX:91009954-91077434    | 163.792 | 131.142 | -0.32073  | 3.19021 | 0.00142168  | 0.025793    |
| <i>Eif1ax</i>                 | chrX:155810126-155823631  | 448.771 | 359.156 | -0.321367 | 3.32701 | 0.000877825 | 0.018121    |
| <i>Rbck1</i>                  | chr2:152142069-152158375  | 287.565 | 230.039 | -0.322011 | 9.6677  | 0           | 0           |
| <i>Tmem70</i>                 | chr1:16655271-16668356    | 116.924 | 93.1372 | -0.328137 | 3.12165 | 0.00179841  | 0.0300383   |

|                      |                           |         |         |           |         |             |             |
|----------------------|---------------------------|---------|---------|-----------|---------|-------------|-------------|
| <i>Timeless</i>      | chr10:127669118-127689997 | 15.6775 | 12.4869 | -0.328279 | 7.61591 | 2.62E-14    | 1.01E-11    |
| <i>H2-Q7</i>         | chr17:35576099-35580718   | 699.845 | 557.188 | -0.328872 | 7.85313 | 4.00E-15    | 1.71E-12    |
| <i>Ptma</i>          | chr1:88423310-88427273    | 4512.15 | 3589.22 | -0.330146 | 5.42984 | 5.64E-08    | 6.80E-06    |
| <i>Dctn2</i>         | chr10:126703317-126725827 | 146.544 | 116.505 | -0.330944 | 3.13513 | 0.00171779  | 0.0291119   |
| <i>Ppif</i>          | chr14:26513655-26520768   | 154.81  | 122.747 | -0.334809 | 2.95903 | 0.00308604  | 0.0433232   |
| <i>Cdca3</i>         | chr6:124780193-124783719  | 151.533 | 119.909 | -0.337689 | 2.91347 | 0.00357434  | 0.0480522   |
| <i>Rps16</i>         | chr7:29135707-29137717    | 1673.38 | 1322.81 | -0.339163 | 4.34453 | 1.40E-05    | 0.000758479 |
| <i>Rtn3</i>          | chr19:7492114-7557781     | 230.679 | 181.863 | -0.343037 | 4.21596 | 2.49E-05    | 0.00119456  |
| <i>Yeats4</i>        | chr10:116652196-116661563 | 205.26  | 161.813 | -0.343126 | 3.22031 | 0.00128053  | 0.0239453   |
| <i>Cd74,Mir5107</i>  | chr18:60963502-60972306   | 365.271 | 287.946 | -0.343169 | 4.59831 | 4.26E-06    | 0.000280119 |
| <i>Rps27a</i>        | chr11:29445841-29478352   | 769.802 | 606.752 | -0.343379 | 4.63941 | 3.49E-06    | 0.000238212 |
| <i>Rps23</i>         | chr13:91062726-91064337   | 1227.17 | 965.757 | -0.345606 | 3.92746 | 8.58E-05    | 0.00335706  |
| <i>Rplp2</i>         | chr7:148633548-148637241  | 1671.14 | 1314.37 | -0.346461 | 3.89133 | 9.97E-05    | 0.00373461  |
| <i>Axl</i>           | chr7:26541518-26573752    | 30.1625 | 23.6968 | -0.34806  | 7.52314 | 5.35E-14    | 1.88E-11    |
| <i>Rps7</i>          | chr12:29315711-29320818   | 829.317 | 651.53  | -0.348092 | 4.32772 | 1.51E-05    | 0.000807356 |
| <i>Igfbp4</i>        | chr11:98902573-98913957   | 387.58  | 304.478 | -0.348155 | 4.4463  | 8.74E-06    | 0.00050059  |
| <i>Bag6</i>          | chr17:35272122-35284267   | 27.5305 | 21.6057 | -0.349623 | 6.16638 | 6.99E-10    | 1.19E-07    |
| <i>Tmem134</i>       | chr19:4125959-4132307     | 85.8938 | 67.3504 | -0.350869 | 4.27985 | 1.87E-05    | 0.000962115 |
| <i>Rpl19</i>         | chr11:97888023-97891807   | 1166.01 | 913.174 | -0.352623 | 13.3007 | 0           | 0           |
| <i>B3gnt5</i>        | chr16:19760326-19772846   | 7.99998 | 6.26131 | -0.353531 | 3.5691  | 0.00035821  | 0.00971026  |
| <i>Adss</i>          | chr1:179693308-179726640  | 155.083 | 121.373 | -0.353598 | 3.74956 | 0.000177147 | 0.00577597  |
| <i>Rpl28</i>         | chr7:4744566-4746149      | 661.053 | 516.658 | -0.355557 | 3.12855 | 0.00175671  | 0.0295981   |
| <i>Apobec3</i>       | chr15:79719961-79738859   | 108.734 | 84.7708 | -0.359169 | 3.34303 | 0.000828676 | 0.017521    |
| <i>Rpl38</i>         | chr11:114529856-114533645 | 1252.72 | 975.499 | -0.360856 | 4.06039 | 4.90E-05    | 0.00209252  |
| <i>Rhot1</i>         | chr11:80022556-80081409   | 18.1911 | 14.1624 | -0.361166 | 8.26364 | 2.22E-16    | 1.03E-13    |
| <i>Rps17</i>         | chr7:88487618-88490120    | 2063.05 | 1600.96 | -0.365843 | 4.47539 | 7.63E-06    | 0.000452748 |
| <i>H2-Q8</i>         | chr17:35561791-35565306   | 209.552 | 162.571 | -0.366236 | 3.00567 | 0.00264992  | 0.0394396   |
| <i>Z310022A10Rik</i> | chr7:28338308-28367117    | 24.1932 | 18.7593 | -0.366997 | 2.90995 | 0.00361481  | 0.0484837   |
| <i>Tsc22d1</i>       | chr14:76815627-76907573   | 331.563 | 256.956 | -0.367761 | 4.31235 | 1.62E-05    | 0.000853742 |
| <i>Pias3</i>         | chr3:96500297-96512483    | 10.3465 | 8.01719 | -0.367978 | 4.84239 | 1.28E-06    | 0.000101704 |
| <i>Hnrnpa2b1</i>     | chr6:51410433-51419893    | 234.271 | 181.513 | -0.368105 | 6.01571 | 1.79E-09    | 2.84E-07    |
| <i>Dhrs3</i>         | chr4:144482729-144517548  | 70.7378 | 54.6308 | -0.372768 | 3.69977 | 0.000215795 | 0.00653725  |
| <i>Hsd17b12</i>      | chr2:93872853-93998066    | 91.408  | 70.5352 | -0.373978 | 2.90956 | 0.00361942  | 0.0484893   |
| <i>Rps21</i>         | chr2:179992083-179993149  | 6943.38 | 5348.33 | -0.376548 | 5.52472 | 3.30E-08    | 4.44E-06    |
| <i>Cox7a2l</i>       | chr17:83901256-83913673   | 1117.41 | 860.197 | -0.377421 | 5.17135 | 2.32E-07    | 2.36E-05    |
| <i>Fbxo3</i>         | chr2:103867955-103903394  | 64.5009 | 49.6212 | -0.378363 | 3.07701 | 0.00209089  | 0.0336607   |
| <i>Cd24a</i>         | chr10:43298974-43304071   | 553.841 | 425.841 | -0.379156 | 5.0759  | 3.86E-07    | 3.63E-05    |
| <i>Cdc16</i>         | chr8:13757689-13781882    | 89.4994 | 68.764  | -0.380224 | 3.17143 | 0.00151693  | 0.0267252   |
| <i>Calr</i>          | chr8:87365986-87370830    | 346.546 | 266.201 | -0.380529 | 4.64061 | 3.47E-06    | 0.000238212 |
| <i>Ifngr1</i>        | chr10:19311763-19330031   | 149.437 | 114.788 | -0.380563 | 3.71982 | 0.000199363 | 0.00623682  |
| <i>Hnrpd1</i>        | chr5:100462597-100468241  | 113.813 | 87.3774 | -0.381339 | 3.75142 | 0.000175836 | 0.00574944  |
| <i>Nubp1</i>         | chr16:10412030-10447443   | 86.2784 | 66.2303 | -0.381508 | 3.08518 | 0.00203429  | 0.0330251   |
| <i>Ncl</i>           | chr1:88241293-88256030    | 80.2526 | 61.5713 | -0.38229  | 4.74245 | 2.11E-06    | 0.000155673 |
| <i>Tom1l2</i>        | chr11:60040215-60166407   | 10.9195 | 8.37216 | -0.38323  | 3.08467 | 0.00203781  | 0.033036    |



|                      |                           |         |         |           |         |             |             |
|----------------------|---------------------------|---------|---------|-----------|---------|-------------|-------------|
| <i>Rps20</i>         | chr4:3761619-3762747      | 3867.46 | 2964.07 | -0.383806 | 5.46686 | 4.58E-08    | 5.83E-06    |
| <i>Acadl</i>         | chr1:66877412-66909883    | 193.357 | 147.987 | -0.38579  | 3.99427 | 6.49E-05    | 0.00268269  |
| <i>Rpl37</i>         | chr15:5066612-5069140     | 603.204 | 461.093 | -0.38759  | 4.25462 | 2.09E-05    | 0.00104858  |
| <i>Tbxa2r</i>        | chr10:80791475-80797917   | 100.845 | 76.5432 | -0.397794 | 3.26183 | 0.00110697  | 0.021333    |
| <i>Glo1</i>          | chr17:30729806-30749604   | 72.1553 | 54.7218 | -0.398989 | 2.91217 | 0.00358933  | 0.0481978   |
| <i>Dek</i>           | chr13:47138867-47201589   | 85.9941 | 65.0988 | -0.401606 | 3.50018 | 0.00046495  | 0.0117507   |
| <i>1110057K04Rik</i> | chr12:8214912-8292565     | 31.7069 | 23.9952 | -0.402048 | 3.12758 | 0.00176252  | 0.0296528   |
| <i>Slc14a1</i>       | chr18:78296829-78338858   | 39.5925 | 29.9497 | -0.402686 | 5.80836 | 6.31E-09    | 9.36E-07    |
| <i>Arl6ip6</i>       | chr2:53051117-53078255    | 55.0524 | 41.626  | -0.40332  | 2.9527  | 0.00315008  | 0.0437721   |
| <i>Serpnb6a</i>      | chr13:34009786-34094663   | 34.5202 | 26.0876 | -0.40408  | 3.82489 | 0.000130832 | 0.00455727  |
| <i>Cers5</i>         | chr15:99566022-99602946   | 101.628 | 76.7519 | -0.405019 | 3.39354 | 0.000689954 | 0.0155374   |
| <i>Ak3</i>           | chr19:29095321-29123219   | 71.5592 | 53.8377 | -0.41052  | 3.42303 | 0.000619265 | 0.0145691   |
| <i>Nap1l1</i>        | chr10:110910247-110935206 | 145.615 | 109.513 | -0.411061 | 5.08928 | 3.59E-07    | 3.47E-05    |
| <i>Kcnn4</i>         | chr7:25155281-25170231    | 145.905 | 109.371 | -0.415798 | 4.5246  | 6.05E-06    | 0.000376554 |
| <i>Rit1</i>          | chr3:88520775-88534970    | 45.0688 | 33.7825 | -0.415853 | 3.13561 | 0.00171496  | 0.0291066   |
| <i>Pak1</i>          | chr7:104991448-105060891  | 55.2972 | 41.2323 | -0.423432 | 3.338   | 0.00084383  | 0.0177588   |
| <i>Nkiras2</i>       | chr11:100484268-100512007 | 70.1019 | 52.2304 | -0.424564 | 3.07524 | 0.00210335  | 0.0337364   |
| <i>Spg21</i>         | chr9:65308743-65336277    | 53.5675 | 39.8983 | -0.425029 | 3.13949 | 0.00169243  | 0.0289363   |
| <i>Gm6402</i>        | chr17:30352468-30713232   | 203.416 | 151.473 | -0.425374 | 3.88985 | 0.000100308 | 0.00374538  |
| <i>Rhog</i>          | chr7:109387636-109398632  | 459.761 | 342.103 | -0.426454 | 4.9222  | 8.56E-07    | 7.13E-05    |
| <i>Nbr1</i>          | chr11:101413420-101443265 | 18.8208 | 13.9971 | -0.427205 | 9.71953 | 0           | 0           |
| <i>Tapbp</i>         | chr17:34056422-34066235   | 84.0952 | 62.4498 | -0.429327 | 9.0016  | 0           | 0           |
| <i>1110038B12Rik</i> | chr17:35087180-35089416   | 189.322 | 140.395 | -0.431354 | 2.9506  | 0.00317161  | 0.0439849   |
| <i>Wls</i>           | chr3:159502658-159598139  | 94.5276 | 69.7567 | -0.438405 | 4.18059 | 2.91E-05    | 0.00137365  |
| <i>Tfeb</i>          | chr17:47873985-47929365   | 15.0833 | 11.0765 | -0.445445 | 3.17267 | 0.00151045  | 0.0266516   |
| <i>Pigp</i>          | chr16:94580369-94690828   | 100.355 | 73.6318 | -0.446718 | 3.72513 | 0.000195212 | 0.00615688  |
| <i>Trim13</i>        | chr14:62217062-62301210   | 19.8815 | 14.5821 | -0.447224 | 3.41358 | 0.000641156 | 0.0149024   |
| <i>Ccna2</i>         | chr3:36451527-36470918    | 82.4534 | 60.4014 | -0.448997 | 3.9437  | 8.02E-05    | 0.00318046  |
| <i>Lrrcc1</i>        | chr3:14533787-14572658    | 7.46596 | 5.46005 | -0.451414 | 3.69074 | 0.000223607 | 0.0067053   |
| <i>Commd7</i>        | chr2:153442665-153458517  | 35.4701 | 25.8906 | -0.454173 | 3.4403  | 0.000581066 | 0.0139251   |
| <i>Slc40a1</i>       | chr1:45964914-45982439    | 53.0518 | 38.6693 | -0.456215 | 3.66996 | 0.000242584 | 0.00710864  |
| <i>Mmadhc</i>        | chr2:50135400-50152197    | 115.64  | 84.1386 | -0.458802 | 3.33476 | 0.000853716 | 0.0178694   |
| <i>Ubxn8</i>         | chr8:34710092-34752448    | 36.8084 | 26.7249 | -0.461849 | 2.97402 | 0.00293922  | 0.0420537   |
| <i>Tcp1l1l2</i>      | chr10:84039691-84077100   | 50.1884 | 36.3295 | -0.46621  | 3.18051 | 0.00147016  | 0.0262308   |
| <i>Gm6251</i>        | chr10:19868725-20001396   | 971.299 | 700.106 | -0.472343 | 5.09971 | 3.40E-07    | 3.31E-05    |
| <i>Pfn1</i>          | chr11:70465348-70468152   | 1698.73 | 1222.35 | -0.474804 | 6.6645  | 2.66E-11    | 6.54E-09    |
| <i>Mapk6</i>         | chr9:75234707-75257821    | 18.1175 | 13.0337 | -0.475131 | 2.95736 | 0.00310281  | 0.0433232   |
| <i>Rnf20</i>         | chr4:49644931-49669758    | 16.8723 | 12.1313 | -0.475925 | 3.01076 | 0.00260595  | 0.0392081   |
| <i>Prtn3</i>         | chr10:79342411-79345917   | 2083.32 | 1496.59 | -0.477207 | 7.07967 | 1.45E-12    | 4.29E-10    |
| <i>1600012H06Rik</i> | chr17:15080188-15098237   | 15.2333 | 10.9239 | -0.479743 | 3.39607 | 0.000683615 | 0.0154246   |
| <i>Csnk1a1</i>       | chr18:61715235-61747953   | 169.591 | 121.424 | -0.482008 | 4.78388 | 1.72E-06    | 0.000130937 |
| <i>Lancl1</i>        | chr1:67047090-67085446    | 50.1601 | 35.8322 | -0.485283 | 10.0837 | 0           | 0           |
| <i>Plaa</i>          | chr4:94231829-94269938    | 14.2657 | 10.1789 | -0.486965 | 3.10273 | 0.00191747  | 0.0315265   |
| <i>Cirbp</i>         | chr10:79630585-79634398   | 171.256 | 122.05  | -0.488685 | 4.04479 | 5.24E-05    | 0.00222042  |

|                      |                          |         |         |           |         |             |             |
|----------------------|--------------------------|---------|---------|-----------|---------|-------------|-------------|
| <i>Fip111</i>        | chr5:74931506-75098928   | 30.1063 | 21.4066 | -0.49201  | 8.46172 | 0           | 0           |
| <i>Hhex</i>          | chr19:37509330-37515221  | 152.174 | 108.178 | -0.492313 | 4.49026 | 7.11E-06    | 0.000428862 |
| <i>Strap</i>         | chr6:137683602-137700451 | 101.579 | 72.1721 | -0.493092 | 4.54885 | 5.39E-06    | 0.000341182 |
| <i>Orc2</i>          | chr1:58519614-58561953   | 40.6642 | 28.8648 | -0.494446 | 9.1183  | 0           | 0           |
| <i>Uqcrfs1</i>       | chr13:30632180-30637185  | 365.055 | 257.474 | -0.503689 | 5.4589  | 4.79E-08    | 5.94E-06    |
| <i>Dhx40</i>         | chr11:86582350-86621162  | 26.897  | 18.9676 | -0.503902 | 3.21382 | 0.00130983  | 0.024375    |
| <i>Rpl12</i>         | chr2:32817231-32819565   | 438.62  | 308.987 | -0.505426 | 4.31921 | 1.57E-05    | 0.000835277 |
| <i>Luc7l3</i>        | chr11:94152452-94183225  | 42.6036 | 29.9524 | -0.508303 | 3.70068 | 0.000215022 | 0.00653725  |
| <i>Rad51</i>         | chr2:118938552-118961806 | 37.3564 | 26.1965 | -0.511981 | 2.92217 | 0.00347602  | 0.0471135   |
| <i>Ube2g1</i>        | chr11:72420762-72499983  | 53.4876 | 37.3858 | -0.516713 | 4.35422 | 1.34E-05    | 0.000736063 |
| <i>Mib2</i>          | chr4:155028580-155043363 | 11.1643 | 7.79911 | -0.517506 | 4.11134 | 3.93E-05    | 0.00173786  |
| <i>Gm2a</i>          | chr11:54911486-54926530  | 53.9845 | 37.5492 | -0.523765 | 4.60919 | 4.04E-06    | 0.000272039 |
| <i>Mtdh</i>          | chr15:34012473-34072140  | 65.0049 | 45.1007 | -0.527398 | 4.69331 | 2.69E-06    | 0.000194477 |
| <i>Tjap1</i>         | chr17:46394799-46419975  | 19.2547 | 13.3279 | -0.53076  | 3.52729 | 0.000419836 | 0.0108716   |
| <i>H2-Aa</i>         | chr17:34419695-34424716  | 247.046 | 170.941 | -0.531281 | 4.6502  | 3.32E-06    | 0.000231233 |
| <i>Mpdu1</i>         | chr11:69468538-69476144  | 72.2954 | 49.8445 | -0.536472 | 3.20475 | 0.00135178  | 0.0247576   |
| <i>Rnf139</i>        | chr15:58720783-58765285  | 15.6839 | 10.8023 | -0.537943 | 2.91758 | 0.0035276   | 0.0476452   |
| <i>Mpo</i>           | chr11:87607285-87617914  | 1618.04 | 1112.46 | -0.540491 | 8.76683 | 0           | 0           |
| <i>Aldh2</i>         | chr5:122017695-122043833 | 163.705 | 112.543 | -0.540625 | 5.45897 | 4.79E-08    | 5.94E-06    |
| <i>Rnf40</i>         | chr7:134732211-134747119 | 20.4544 | 13.9817 | -0.548872 | 3.25448 | 0.001136    | 0.0218062   |
| <i>9930012K11Rik</i> | chr14:70554211-70559309  | 23.2777 | 15.8934 | -0.550523 | 4.8124  | 1.49E-06    | 0.000115849 |
| <i>Ascc1</i>         | chr10:59450656-59562738  | 102.739 | 69.7729 | -0.558252 | 4.42433 | 9.67E-06    | 0.00054526  |
| <i>Prpf38b</i>       | chr3:108705724-108714622 | 21.228  | 14.403  | -0.5596   | 2.91621 | 0.00354312  | 0.0477278   |
| <i>Rps15a-ps6</i>    | chr11:6005694-6100454    | 707.45  | 477.434 | -0.567328 | 6.30498 | 2.88E-10    | 5.47E-08    |
| <i>Ppp1r2</i>        | chr16:31251626-31275363  | 19.1725 | 12.9337 | -0.567903 | 3.24807 | 0.0011619   | 0.022193    |
| <i>Tbcc</i>          | chr17:47027569-47029412  | 36.1756 | 24.3854 | -0.568998 | 2.96193 | 0.00305714  | 0.0432068   |
| <i>Gt(ROSA)26Sor</i> | chr6:112996320-113027238 | 108.774 | 73.2299 | -0.570831 | 3.7432  | 0.000181693 | 0.00582575  |
| <i>Mtmr6</i>         | chr14:60884041-60921208  | 21.3749 | 14.347  | -0.57517  | 3.34996 | 0.000808244 | 0.0172609   |
| <i>Mpzl1</i>         | chr1:167522311-167564672 | 37.1    | 24.8803 | -0.576414 | 5.46911 | 4.52E-08    | 5.82E-06    |
| <i>Wash</i>          | chr17:66460885-66469843  | 11.1131 | 7.44318 | -0.578263 | 3.13726 | 0.00170536  | 0.0290205   |
| <i>A930005H10Rik</i> | chr3:115584496-115591048 | 45.5051 | 30.3276 | -0.585396 | 3.09047 | 0.00199838  | 0.0325793   |
| <i>Cdc40</i>         | chr10:40551426-40602949  | 42.9466 | 28.6184 | -0.585597 | 4.27256 | 1.93E-05    | 0.00098534  |
| <i>Snrf</i>          | chr10:93003376-93067990  | 135.624 | 90.1359 | -0.589437 | 3.56549 | 0.00036317  | 0.00975853  |
| <i>Rdh14</i>         | chr12:10397585-10402368  | 63.744  | 42.1192 | -0.597812 | 3.55154 | 0.00038298  | 0.0101394   |
| <i>Fgfr1</i>         | chr8:26629243-26686186   | 7.24345 | 4.78112 | -0.59933  | 5.42378 | 5.84E-08    | 6.96E-06    |
| <i>Rnaset2b</i>      | chr17:7183208-7202542    | 226.088 | 148.324 | -0.60813  | 5.01379 | 5.34E-07    | 4.75E-05    |
| <i>Gemin7</i>        | chr7:20150297-20158692   | 140.647 | 92.1394 | -0.61019  | 3.6116  | 0.000304314 | 0.0085704   |
| <i>Mrps24</i>        | chr11:5603985-5607702    | 77.2417 | 50.5067 | -0.612906 | 3.26419 | 0.00109778  | 0.0212951   |
| <i>Cdca2</i>         | chr14:68294410-68333898  | 13.8325 | 9.02824 | -0.61555  | 3.55074 | 0.000384148 | 0.0101394   |
| <i>Themis2</i>       | chr4:132338271-132352279 | 24.5232 | 15.8635 | -0.628437 | 3.20083 | 0.00137034  | 0.0249802   |
| <i>H2-T10</i>        | chr17:36252815-36258389  | 19.2185 | 12.4138 | -0.630551 | 3.06693 | 0.00216267  | 0.0345281   |
| <i>Dusp6</i>         | chr10:98725864-98730123  | 19.2741 | 12.4349 | -0.632273 | 3.02917 | 0.00245225  | 0.0376956   |
| <i>Cnn3</i>          | chr3:121129458-121161123 | 41.8513 | 26.9134 | -0.636946 | 3.64271 | 0.000269786 | 0.00778746  |
| <i>Gtf3a</i>         | chr5:147760232-147775373 | 93.4909 | 59.6297 | -0.648795 | 4.20615 | 2.60E-05    | 0.00124241  |

|                      |                           |         |         |           |         |             |             |
|----------------------|---------------------------|---------|---------|-----------|---------|-------------|-------------|
| <i>Fam105a</i>       | chr15:27584825-27611297   | 13.143  | 8.38112 | -0.649077 | 3.10846 | 0.00188068  | 0.0310539   |
| <i>Fam43a</i>        | chr16:30599808-30602883   | 16.2834 | 10.3718 | -0.650733 | 3.02101 | 0.00251936  | 0.0384883   |
| <i>Asb7</i>          | chr7:73789456-73834447    | 3.81261 | 2.41211 | -0.660483 | 3.17906 | 0.00147754  | 0.0262308   |
| <i>Pgls</i>          | chr8:74116082-74120166    | 427.005 | 269.858 | -0.662051 | 6.38415 | 1.72E-10    | 3.63E-08    |
| <i>Socs2</i>         | chr10:94874123-94879491   | 12.3912 | 7.81871 | -0.664312 | 4.34538 | 1.39E-05    | 0.000758479 |
| <i>Adam11</i>        | chr11:102622752-102641576 | 8.76232 | 5.52218 | -0.666075 | 3.97909 | 6.92E-05    | 0.00281959  |
| <i>Pex7</i>          | chr10:19579895-19627480   | 24.3255 | 15.3253 | -0.66655  | 3.05006 | 0.00228792  | 0.0360309   |
| <i>H13</i>           | chr2:152495196-152534404  | 141.581 | 88.4778 | -0.678244 | 9.29354 | 0           | 0           |
| <i>Serpinf1</i>      | chr11:75223530-75236125   | 136.232 | 85.0029 | -0.680478 | 5.4561  | 4.87E-08    | 5.94E-06    |
| <i>Zfp444</i>        | chr7:6124114-6144706      | 7.22272 | 4.49825 | -0.683177 | 3.20665 | 0.0013429   | 0.0246833   |
| <i>Triobp</i>        | chr15:78778153-78841471   | 52.6238 | 32.7414 | -0.684599 | 4.77825 | 1.77E-06    | 0.000132905 |
| <i>Ubald1</i>        | chr16:4874778-4879851     | 38.1801 | 23.6392 | -0.691636 | 3.15973 | 0.00157917  | 0.02757     |
| <i>1500011B03Rik</i> | chr5:115258204-115263985  | 123.927 | 75.8365 | -0.708527 | 4.28886 | 1.80E-05    | 0.00093217  |
| <i>Rbfa</i>          | chr18:80389002-80397358   | 124.661 | 76.1953 | -0.710234 | 5.2279  | 1.71E-07    | 1.87E-05    |
| <i>Malsu1</i>        | chr6:49023793-49034716    | 95.6878 | 58.3627 | -0.713288 | 3.59653 | 0.000322492 | 0.0089732   |
| <i>Rae1</i>          | chr2:172825617-172841240  | 53.8214 | 32.721  | -0.717963 | 4.23397 | 2.30E-05    | 0.00112611  |
| <i>Cd79a</i>         | chr7:25682529-25687216    | 34.025  | 20.6699 | -0.719064 | 3.04415 | 0.00233338  | 0.0363728   |
| <i>Ptger3</i>        | chr3:157229855-157307722  | 56.0794 | 33.9343 | -0.724729 | 4.64521 | 3.40E-06    | 0.000235473 |
| <i>D4Wsu53e</i>      | chr4:134479539-134483285  | 108.694 | 65.3528 | -0.733946 | 5.22609 | 1.73E-07    | 1.87E-05    |
| <i>Rnaset2b</i>      | chr17:8321455-8340697     | 197.846 | 117.95  | -0.746205 | 5.75432 | 8.70E-09    | 1.25E-06    |
| <i>Rspry1</i>        | chr8:97125840-97184176    | 8.45379 | 4.91475 | -0.78248  | 2.9589  | 0.00308737  | 0.0433232   |
| <i>Fam3c</i>         | chr6:22256521-22306081    | 12.3839 | 7.17223 | -0.787975 | 3.00824 | 0.00262764  | 0.0393329   |
| <i>Cadm1</i>         | chr9:47338434-47661468    | 3.35305 | 1.93387 | -0.793985 | 3.29451 | 0.000985922 | 0.0198457   |
| <i>Pan3</i>          | chr5:148242155-148360077  | 8.92977 | 5.14988 | -0.794084 | 3.34559 | 0.000821079 | 0.0174584   |
| <i>B4galt4</i>       | chr16:38742376-38769158   | 22.7875 | 13.0969 | -0.799014 | 3.6615  | 0.000250743 | 0.00732917  |
| <i>Letmd1</i>        | chr15:100299464-100309683 | 44.0364 | 25.256  | -0.802071 | 5.13892 | 2.76E-07    | 2.75E-05    |
| <i>Slc24a6</i>       | chr5:120961200-120984033  | 10.372  | 5.87646 | -0.819679 | 6.28704 | 3.24E-10    | 6.04E-08    |
| <i>Homez</i>         | chr14:55471573-55482995   | 3.87636 | 2.14287 | -0.855158 | 3.20022 | 0.00137324  | 0.0249802   |
| <i>Tctn2</i>         | chr5:125048757-125077658  | 10.9314 | 6.02732 | -0.858885 | 3.01048 | 0.00260832  | 0.0392081   |
| <i>Mtx2</i>          | chr2:74663868-74714805    | 44.4538 | 24.4288 | -0.863726 | 3.91538 | 9.03E-05    | 0.00347102  |
| <i>Gem</i>           | chr4:11631593-11642140    | 27.1897 | 14.8672 | -0.870928 | 4.23201 | 2.32E-05    | 0.00112645  |
| <i>Ndfip1</i>        | chr18:38578628-38624060   | 50.6085 | 27.1473 | -0.898574 | 3.67361 | 0.000239151 | 0.00704532  |
| <i>Elane</i>         | chr10:79349056-79350961   | 1723.16 | 923.585 | -0.899736 | 12.4761 | 0           | 0           |
| <i>Galnt6</i>        | chr15:100520345-100559807 | 28.6016 | 15.1467 | -0.917088 | 8.31315 | 0           | 0           |
| <i>Sfpi1</i>         | chr2:90936953-90955913    | 173.514 | 91.7849 | -0.918724 | 7.46111 | 8.57E-14    | 2.83E-11    |
| <i>Rpap3</i>         | chr15:97505535-97536253   | 34.6962 | 18.2821 | -0.924346 | 4.96279 | 6.95E-07    | 6.00E-05    |
| <i>Pspc1</i>         | chr14:57341285-57397153   | 11.8104 | 6.05391 | -0.964114 | 3.27153 | 0.00106966  | 0.0210881   |
| <i>Mtfmt</i>         | chr9:65283588-65300861    | 18.2302 | 9.32647 | -0.966925 | 3.69917 | 0.000216308 | 0.00653725  |
| <i>Srrm2</i>         | chr17:23940153-23966076   | 7.00695 | 3.54078 | -0.984717 | 4.79697 | 1.61E-06    | 0.000124305 |
| <i>Kansl1l</i>       | chr1:66747466-66864169    | 4.19171 | 2.05675 | -1.02717  | 4.54553 | 5.48E-06    | 0.000344722 |
| <i>St6galnac2</i>    | chr11:116538018-116555974 | 9.15429 | 4.38576 | -1.06162  | 2.92845 | 0.00340656  | 0.0462804   |
| <i>Depdc1a</i>       | chr3:159158396-159192919  | 4.71621 | 2.2325  | -1.07897  | 3.65102 | 0.000261197 | 0.00759265  |
| <i>Cep78</i>         | chr19:16030262-16059479   | 11.4363 | 5.39995 | -1.0826   | 3.67398 | 0.000238799 | 0.00704532  |
| <i>Ddx23</i>         | chr15:98475937-98493320   | 7.13998 | 3.36406 | -1.08572  | 3.1234  | 0.00178776  | 0.0299036   |

|                 |                           |          |           |          |         |             |             |
|-----------------|---------------------------|----------|-----------|----------|---------|-------------|-------------|
| <i>Fdx1</i>     | chr9:51751411-51771638    | 49.1548  | 23.0683   | -1.09142 | 4.07387 | 4.62E-05    | 0.00199703  |
| <i>Tlr4</i>     | chr4:66488844-66503830    | 4.89365  | 2.28624   | -1.09793 | 3.07608 | 0.00209741  | 0.0337188   |
| <i>Gdpd3</i>    | chr7:133909927-133919159  | 124.994  | 58.0715   | -1.10595 | 6.93341 | 4.11E-12    | 1.16E-09    |
| <i>Hddc3</i>    | chr7:87488022-87490983    | 50.9898  | 23.2996   | -1.1299  | 4.25152 | 2.12E-05    | 0.00105481  |
| <i>Ticam2</i>   | chr18:46717884-46734187   | 6.74148  | 3.04412   | -1.14704 | 3.41636 | 0.000634654 | 0.0148107   |
| <i>Specc1</i>   | chr11:61890598-62036515   | 2.54704  | 1.14999   | -1.1472  | 3.08037 | 0.0020674   | 0.033422    |
| <i>Chdh</i>     | chr14:30822185-31340242   | 3.37025  | 1.51484   | -1.15369 | 3.15427 | 0.001609    | 0.0278388   |
| <i>Hyi</i>      | chr4:118032603-118081868  | 36.6414  | 15.7858   | -1.21485 | 6.71397 | 1.89E-11    | 4.77E-09    |
| <i>Serpine2</i> | chr1:79790895-79855240    | 24.7525  | 10.6523   | -1.21642 | 5.13803 | 2.78E-07    | 2.75E-05    |
| <i>Rab12</i>    | chr15:89412957-89422354   | 20.3025  | 8.6389    | -1.23274 | 4.25381 | 2.10E-05    | 0.00104858  |
| <i>Ramp2</i>    | chr11:101107647-101109564 | 21.4122  | 8.96245   | -1.25646 | 3.15701 | 0.00159393  | 0.0277024   |
| <i>Glb1l</i>    | chr1:75188733-75207353    | 5.57778  | 2.33013   | -1.25928 | 3.41022 | 0.00064911  | 0.0150269   |
| <i>Pus1</i>     | chr4:155243675-155265871  | 14.3026  | 5.80142   | -1.3018  | 3.2173  | 0.00129402  | 0.0241197   |
| <i>Gstcd</i>    | chr3:132645514-132754704  | 5.34288  | 2.01641   | -1.40583 | 3.22417 | 0.00126339  | 0.0237014   |
| <i>Matn2</i>    | chr15:34236435-34365995   | 4.91413  | 1.60294   | -1.61621 | 3.95088 | 7.79E-05    | 0.0030972   |
| <i>Nxpe5</i>    | chr5:138667131-138693103  | 4.34292  | 1.39817   | -1.63513 | 3.07415 | 0.00211103  | 0.033797    |
| <i>Cercam</i>   | chr2:29725013-29738360    | 4.68196  | 1.50094   | -1.64125 | 3.45299 | 0.000554413 | 0.0134254   |
| <i>Mefv</i>     | chr16:3707214-3718124     | 2.14447  | 0.669348  | -1.67979 | 3.40742 | 0.000655811 | 0.0150615   |
| <i>Mcf2</i>     | chrX:57309132-57400820    | 2.78423  | 0.864931  | -1.68662 | 3.1741  | 0.00150302  | 0.0265611   |
| <i>Camk2b</i>   | chr11:5869668-5965751     | 3.46628  | 1.07498   | -1.68908 | 3.67691 | 0.000236078 | 0.00702469  |
| <i>Cx3cl1</i>   | chr8:97296079-97306326    | 2.59786  | 0.787762  | -1.7215  | 2.91595 | 0.00354608  | 0.0477278   |
| <i>Eif2s3y</i>  | chrY:347054-365037        | 35.2661  | 10.6786   | -1.72356 | 7.20818 | 5.67E-13    | 1.73E-10    |
| <i>Vpreb1</i>   | chr16:16868493-16869348   | 20.2586  | 5.96665   | -1.76354 | 3.6251  | 0.000288846 | 0.00821473  |
| <i>Dgke</i>     | chr11:88898895-88922062   | 1.94101  | 0.53172   | -1.86807 | 3.40219 | 0.000668479 | 0.0152016   |
| <i>Cd19</i>     | chr7:133551961-133558384  | 3.26588  | 0.868795  | -1.91038 | 3.03589 | 0.00239824  | 0.0371119   |
| <i>Mcoln3</i>   | chr3:145784754-145803610  | 7.25439  | 1.85068   | -1.9708  | 3.7567  | 0.000172168 | 0.00569386  |
| <i>Fbp1</i>     | chr13:62966112-62989596   | 72.9744  | 17.6455   | -2.04809 | 9.978   | 0           | 0           |
| <i>Gkn3</i>     | chr6:87333312-87338929    | 10.707   | 2.54102   | -2.07507 | 3.03495 | 0.00240573  | 0.037178    |
| <i>Igll1</i>    | chr16:16860763-16864078   | 10.8422  | 2.2917    | -2.24216 | 3.37325 | 0.00074286  | 0.0162544   |
| <i>Pik3r6</i>   | chr11:68316520-68366200   | 4.66747  | 0.82629   | -2.49792 | 4.77532 | 1.79E-06    | 0.000133987 |
| <i>Il7r</i>     | chr15:9435913-9459631     | 2.80551  | 0.431785  | -2.69988 | 3.87639 | 0.000106016 | 0.00390807  |
| <i>Pim1</i>     | chr17:29627989-29632404   | 3.95826  | 0.557999  | -2.82653 | 3.46841 | 0.000523546 | 0.0128937   |
| <i>Rora</i>     | chr9:68501608-69226835    | 5.59228  | 0.72551   | -2.94637 | 3.94025 | 8.14E-05    | 0.00321558  |
| <i>Epb4.2</i>   | chr2:120843952-120862491  | 1.00807  | 0.117655  | -3.09896 | 2.90342 | 0.00369108  | 0.049052    |
| <i>Tmem87a</i>  | chr2:120181044-120330655  | 3.39585  | 0.394142  | -3.10699 | 4.62858 | 3.68E-06    | 0.000249222 |
| <i>Zfp711</i>   | chrX:109714134-109748671  | 1.29502  | 0.139705  | -3.21252 | 3.50078 | 0.000463903 | 0.0117498   |
| <i>Slc18a1</i>  | chr8:71561606-71637616    | 1.08718  | 0.105024  | -3.3718  | 2.94229 | 0.00325794  | 0.0448936   |
| <i>Efhd1</i>    | chr1:89160938-89207366    | 1.32848  | 0.103139  | -3.68711 | 2.97476 | 0.00293221  | 0.0420054   |
| <i>Meiob</i>    | chr17:24941326-24976732   | 3.43716  | 0.26509   | -3.69667 | 3.592   | 0.000328147 | 0.00910864  |
| <i>Arhgap42</i> | chr9:8994952-9260885      | 0.861903 | 0.045939  | -4.22974 | 3.38653 | 0.000707819 | 0.0157477   |
| <i>Mmp23</i>    | chr4:155024763-155027493  | 1.63896  | 0.0541973 | -4.91841 | 2.93612 | 0.0033235   | 0.045634    |
