# Supplementary material for: Deletion of Asxl1 results in myelodysplasia and severe developmental defects in vivo
Source: PubMed Central journal article supplement — J Exp Med. 2013 Nov 18;210(12):2641–59. doi: 10.1084/jem.20131141 (PMC3832937; doi:10.1084/jem.20131141), 2013-11-18
Supplement: supp_jem.20131141_JEM_20131141_TableS3.pdf [file supp_jem.20131141_JEM_20131141_TableS3.pdf]

**Table S3.** Differentially expressed genes in LSK cells from 6-wk-old *Mx1-cre Asxl1<sup>fl/fl</sup>* (A), *Mx1-cre Tet2<sup>fl/fl</sup>* (T), and *Mx1-cre Asxl1<sup>fl/fl</sup> Tet2<sup>fl/fl</sup>* (D)

| Sample | Chr   | Genes           | Fold change | log2 fold change | P-value     | Adj. p- value | Type |
|--------|-------|-----------------|-------------|------------------|-------------|---------------|------|
| A      | chr10 | <i>EIF3A</i>    | 1.601223125 | 0.679174357      | 0.00447755  | 0.030799497   | Up   |
| A      | chr11 | <i>ETS1</i>     | 0.549026988 | -0.865051025     | 0.00134372  | 0.013491987   | Down |
| A      | chr14 | <i>ARHGEF40</i> | 0.502284364 | -0.993423731     | 0.001859402 | 0.016854328   | Down |
| A      | chr8  | <i>MTDH</i>     | 1.560004862 | 0.641550526      | 0.007714403 | 0.044674403   | Up   |
| A      | chr12 | <i>PXN</i>      | 0.333756534 | -1.583132016     | 8.94E-09    | 2.01E-06      | Down |
| A      | chr19 | <i>PPP2R1A</i>  | 0.620428821 | -0.688662389     | 0.003647348 | 0.026717553   | Down |
| A      | chr12 | <i>PIP4K2C</i>  | 0.5006348   | -0.998169515     | 0.001559275 | 0.014954607   | Down |
| A      | chr7  | <i>C7orf23</i>  | 0.355844026 | -1.490683079     | 0.000227659 | 0.003849264   | Down |
| A      | chr12 | <i>CACNA1C</i>  | 0.10695343  | -3.224945349     | 0.004993909 | 0.033105891   | Down |
| A      | chr19 | <i>RAB11B</i>   | 0.402783171 | -1.311924688     | 0.000569445 | 0.00748576    | Down |
| A      | chr7  | <i>TMEM178B</i> | 0.108178131 | -3.208519221     | 0.006328853 | 0.038875536   | Down |
| A      | chr5  | <i>CAMK2A</i>   | 0.376411724 | -1.409616529     | 0.00066373  | 0.00825898    | Down |
| A      | chr12 | <i>FOXJ2</i>    | 0.33464104  | -1.579313708     | 8.92E-05    | 0.00199952    | Down |
| A      | chr1  | <i>MAP7D1</i>   | 0.258838712 | -1.949874693     | 2.74E-09    | 7.00E-07      | Down |
| A      | chr4  | <i>G3BP2</i>    | 1.587752146 | 0.66698572       | 0.006364102 | 0.039018613   | Up   |
| A      | chr3  | <i>PLCL2</i>    | 1.629376953 | 0.704320407      | 0.006761325 | 0.040632818   | Up   |
| A      | chr16 | <i>GSG1L</i>    | 0.03555592  | -4.81376639      | 0.004976471 | 0.033040632   | Down |
| A      | chr7  | <i>SNORA9</i>   | 0.291920675 | -1.776351704     | 3.58E-11    | 1.73E-08      | Down |
| A      | chr8  | <i>ELP3</i>     | 1.757397044 | 0.813440173      | 0.005097697 | 0.033549428   | Up   |
| A      | chr7  | <i>TFEC</i>     | 3.644867882 | 1.865866521      | 0.00500331  | 0.033134552   | Up   |
| A      | chr2  | <i>CEBPZ</i>    | 2.177188279 | 1.122466175      | 4.56E-05    | 0.001228943   | Up   |
| A      | chr16 | <i>SLC7A5</i>   | 0.378421923 | -1.401932425     | 0.000149131 | 0.002845913   | Down |
| A      | chr8  | <i>NACAP1</i>   | 2.606400868 | 1.382058989      | 0.000164388 | 0.003056631   | Up   |
| A      | chr20 | <i>KIF16B</i>   | 1.68637129  | 0.753922211      | 0.006760776 | 0.040632818   | Up   |
| A      | chr3  | <i>RBM6</i>     | 2.014269143 | 1.010256466      | 4.84E-05    | 0.001272452   | Up   |
| A      | chr19 | <i>GYS1</i>     | 0.460883157 | -1.117527048     | 0.004408785 | 0.030480863   | Down |
| A      | chr5  | <i>DBN1</i>     | 0.265546522 | -1.912963459     | 0.005204129 | 0.033900009   | Down |
| A      | chr22 | <i>ELFN2</i>    | 0.076721785 | -3.704219898     | 0.002193308 | 0.018897192   | Down |
| A      | chr12 | <i>SMARCC2</i>  | 0.573700358 | -0.801630676     | 0.004090266 | 0.029016437   | Down |
| A      | chr15 | <i>ANXA2</i>    | 3.697104818 | 1.886395946      | 0.008360873 | 0.047261686   | Up   |
| A      | chr10 | <i>ATP5C1</i>   | 1.941045238 | 0.956833742      | 0.003373881 | 0.025426831   | Up   |
| A      | chr17 | <i>LIMD2</i>    | 0.592117557 | -0.756044462     | 0.00462491  | 0.031507802   | Down |
| A      | chr12 | <i>TRPV4</i>    | 0.121596099 | -3.039831145     | 1.00E-04    | 0.002157089   | Down |
| A      | chr6  | <i>PNISR</i>    | 1.820539636 | 0.864366151      | 0.000438885 | 0.006225518   | Up   |
| A      | chr14 | <i>FBXO33</i>   | 2.068872791 | 1.048844941      | 0.000189476 | 0.003396954   | Up   |
| A      | chr3  | <i>THRB</i>     | Inf         | Inf              | 0.004236854 | 0.029733147   | Up   |
| A      | chr10 | <i>ATAD1</i>    | 1.975050758 | 0.981889731      | 0.000968786 | 0.010743614   | Up   |
| A      | chr1  | <i>PKN2</i>     | 1.615454044 | 0.69193971       | 0.006410212 | 0.039154185   | Up   |
| A      | chr3  | <i>GMPS</i>     | 1.875790568 | 0.90749876       | 0.001393057 | 0.013796338   | Up   |
| A      | chr12 | <i>SMARCD1</i>  | 0.485214203 | -1.043306313     | 0.006529481 | 0.039715429   | Down |
| A      | chr7  | <i>DMTF1</i>    | 1.674065471 | 0.743355951      | 0.004607803 | 0.03145693    | Up   |

|   |       |                 |             |              |             |             |      |
|---|-------|-----------------|-------------|--------------|-------------|-------------|------|
| A | chr17 | <i>EPN3</i>     | 0.024411477 | -5.356296595 | 0.001389453 | 0.013771093 | Down |
| A | chr3  | <i>HPS3</i>     | 2.003930996 | 1.002832831  | 0.00596201  | 0.037146595 | Up   |
| A | chr19 | <i>SLC35E1</i>  | 0.475565494 | -1.072284055 | 0.009027558 | 0.049909663 | Down |
| A | chr2  | <i>SLC5A7</i>   | 0           | #NAME?       | 0.004020022 | 0.028580256 | Down |
| A | chr19 | <i>MFSD12</i>   | 0.238125913 | -2.070203471 | 0.000891802 | 0.010166547 | Down |
| A | chr8  | <i>PABPC1</i>   | 0.551928388 | -0.857447004 | 0.009042402 | 0.049949419 | Down |
| A | chr8  | <i>NBN</i>      | 5.099653401 | 2.350399197  | 4.85E-06    | 0.000231977 | Up   |
| A | chr12 | <i>CORO1C</i>   | 0.546124525 | -0.872698148 | 0.000857624 | 0.009925418 | Down |
| A | chr9  | <i>ADAMTSL1</i> | 0           | #NAME?       | 0.000208165 | 0.003598908 | Down |
| A | chr10 | <i>FAM213A</i>  | 4.810657148 | 2.266233983  | 0.005791659 | 0.036521027 | Up   |
| A | chr14 | <i>CIDEB</i>    | 0.068458322 | -3.868630267 | 0.000643451 | 0.008107109 | Down |
| A | chr7  | <i>SLC4A2</i>   | 0.50341143  | -0.990190121 | 0.000862481 | 0.009963231 | Down |
| A | chr7  | <i>C7orf43</i>  | 0.591494546 | -0.75756323  | 0.005418022 | 0.034855321 | Down |
| A | chr19 | <i>TGFB1</i>    | 0.125674012 | -2.992241751 | 3.31E-15    | 3.32E-12    | Down |
| A | chr16 | <i>SHCBP1</i>   | 3.373398822 | 1.754202892  | 0.003986996 | 0.028453945 | Up   |
| A | chr6  | <i>NOL7</i>     | 3.052846022 | 1.610154826  | 9.48E-05    | 0.002076376 | Up   |
| A | chr5  | <i>IPO11</i>    | 1.956235933 | 0.968080378  | 0.000236385 | 0.003955819 | Up   |
| A | chr5  | <i>GNPDA1</i>   | 0.469189731 | -1.091756658 | 0.005886524 | 0.03686637  | Down |
| A | chr15 | <i>CTSH</i>     | 8.740643432 | 3.127739486  | 0.00016933  | 0.003110782 | Up   |
| A | chr11 | <i>TAF6L</i>    | 0.422088972 | -1.244380959 | 0.002786258 | 0.02216139  | Down |
| A | chr12 | <i>BTBD11</i>   | 0.243157222 | -2.040038651 | 7.95E-05    | 0.001852385 | Down |
| A | chr12 | <i>YAF2</i>     | 2.976403478 | 1.57357011   | 0.000287303 | 0.004545661 | Up   |
| A | chr7  | <i>CDK13</i>    | 1.602224953 | 0.680076717  | 0.005078654 | 0.033497557 | Up   |
| A | chr15 | <i>HDGFRP3</i>  | 2.312017271 | 1.209152175  | 0.001774387 | 0.016264797 | Up   |
| A | chr3  | <i>RSRC1</i>    | 2.613219668 | 1.385828403  | 0.001275335 | 0.013035979 | Up   |
| A | chr19 | <i>RPL28</i>    | 0.596241501 | -0.746031299 | 0.000970407 | 0.010743614 | Down |
| A | chr19 | <i>PDE4A</i>    | 0.333064688 | -1.58612569  | 0.000707331 | 0.008636851 | Down |
| A | chr16 | <i>RPL13</i>    | 0.569932839 | -0.811136174 | 0.005247648 | 0.034129319 | Down |
| A | chr9  | <i>ZNF484</i>   | 4.037905519 | 2.013607154  | 0.002744984 | 0.021930886 | Up   |
| A | chr8  | <i>OTUD6B</i>   | 3.544781832 | 1.825696838  | 0.000799123 | 0.009448323 | Up   |
| A | chr20 | <i>SNORA71D</i> | 0.058207749 | -4.102644974 | 8.41E-05    | 0.001930202 | Down |
| A | chr10 | <i>POLL</i>     | 0.45951912  | -1.121803204 | 0.005927832 | 0.037039729 | Down |
| A | chr3  | <i>NUP210</i>   | 0.516052455 | -0.954410378 | 0.000194442 | 0.003443062 | Down |
| A | chr13 | <i>SUGT1</i>    | 2.182775817 | 1.126163965  | 0.000950273 | 0.010601638 | Up   |
| A | chr18 | <i>LOXHD1</i>   | 0.025858851 | -5.273198008 | 0.001286422 | 0.013092836 | Down |
| A | chr12 | <i>BRI3BP</i>   | 0.522973608 | -0.935189952 | 0.005500112 | 0.035192081 | Down |
| A | chr8  | <i>GRINA</i>    | 0.399754227 | -1.322814807 | 1.06E-05    | 0.000410683 | Down |
| A | chr6  | <i>PHF1</i>     | 0.330809227 | -1.59592862  | 5.43E-06    | 0.0002514   | Down |
| A | chr17 | <i>RPL23</i>    | 1.922401527 | 0.942909699  | 0.001868404 | 0.016889386 | Up   |
| A | chr2  | <i>SAP130</i>   | 0.368755961 | -1.439261723 | 4.97E-05    | 0.001295503 | Down |
| A | chr1  | <i>H6PD</i>     | 0.412530203 | -1.277428347 | 0.000168297 | 0.003107191 | Down |
| A | chr12 | <i>FOXM1</i>    | 0.513228845 | -0.962325837 | 0.005958244 | 0.037140858 | Down |
| A | chr22 | <i>ZDHHC8</i>   | 0.352394939 | -1.504734889 | 0.000593773 | 0.007693406 | Down |
| A | chr1  | <i>TTF2</i>     | 2.072533198 | 1.051395211  | 0.008490764 | 0.047709831 | Up   |

|   |       |                 |             |              |             |             |      |
|---|-------|-----------------|-------------|--------------|-------------|-------------|------|
| A | chr12 | <i>PPP1R12A</i> | 1.948248134 | 0.962177434  | 9.67E-05    | 0.002111407 | Up   |
| A | chr4  | <i>IL15</i>     | 12.75023529 | 3.672451965  | 4.17E-05    | 0.001164203 | Up   |
| A | chr12 | <i>ORAI1</i>    | 0.240893467 | -2.053532824 | 5.16E-06    | 0.000242061 | Down |
| A | chr8  | <i>INTS9</i>    | 0.479434268 | -1.060595064 | 0.000205602 | 0.00356878  | Down |
| A | chr14 | <i>RIN3</i>     | 0.192758143 | -2.375136285 | 5.51E-05    | 0.001403054 | Down |
| A | chr11 | <i>DPAGT1</i>   | 0.39625037  | -1.335515814 | 5.43E-05    | 0.001389611 | Down |
| A | chr13 | <i>TPP2</i>     | 1.747479581 | 0.805275598  | 0.001247733 | 0.012864659 | Up   |
| A | chr6  | <i>CUTA</i>     | 0.302543375 | -1.724786103 | 0.00069529  | 0.008513715 | Down |
| A | chr5  | <i>TCF7</i>     | 0.120069838 | -3.058054305 | 7.13E-09    | 1.66E-06    | Down |
| A | chr1  | <i>SNORD21</i>  | 0.242404127 | -2.044513833 | 4.62E-06    | 0.000224369 | Down |
| A | chr1  | <i>PTGER3</i>   | Inf         | Inf          | 0.004711279 | 0.031830394 | Up   |
| A | chr1  | <i>GRIK3</i>    | 0.047407894 | -4.39872889  | 0.000195597 | 0.003443799 | Down |
| A | chr19 | <i>LIPE</i>     | 0.489536374 | -1.030512034 | 0.008426947 | 0.047514876 | Down |
| A | chr17 | <i>IGFBP4</i>   | 0.231607631 | -2.110245308 | 1.00E-14    | 9.32E-12    | Down |
| A | chr19 | <i>NKPD1</i>    | 0.07585263  | -3.720656985 | 0.001332793 | 0.013402891 | Down |
| A | chr7  | <i>INTS1</i>    | 0.3834847   | -1.382759074 | 8.53E-06    | 0.000352339 | Down |
| A | chr1  | <i>LRRC47</i>   | 0.402259049 | -1.31380322  | 0.007547932 | 0.044003197 | Down |
| A | chr7  | <i>C7orf60</i>  | 1.858123005 | 0.89384601   | 0.003445134 | 0.025755636 | Up   |
| A | chr7  | <i>C7orf63</i>  | 0           | #NAME?       | 0.000319282 | 0.004885806 | Down |
| A | chr2  | <i>PCBP1</i>    | 0.394709366 | -1.341137341 | 2.95E-08    | 4.88E-06    | Down |
| A | chr19 | <i>UBA52</i>    | 0.39731229  | -1.331654675 | 2.53E-08    | 4.34E-06    | Down |
| A | chr12 | <i>BAZ2A</i>    | 0.401694604 | -1.315829014 | 0.000284507 | 0.004517848 | Down |
| A | chr3  | <i>WDR6</i>     | 0.565579037 | -0.822199448 | 0.006253387 | 0.038557136 | Down |
| A | chr12 | <i>GLTP</i>     | 0.322964192 | -1.630553878 | 0.000178415 | 0.003240729 | Down |
| A | chr3  | <i>EOMES</i>    | 0.024411477 | -5.356296595 | 0.000502944 | 0.006867079 | Down |
| A | chr18 | <i>RBBP8</i>    | 2.326348256 | 1.218067085  | 0.00024313  | 0.004037623 | Up   |
| A | chr4  | <i>GK2</i>      | 8.278683055 | 3.049401287  | 0.002641702 | 0.021442256 | Up   |
| A | chr11 | <i>PLA2G16</i>  | 2.88279379  | 1.527467643  | 0.000183516 | 0.00329496  | Up   |
| A | chr13 | <i>SLC7A1</i>   | 0.506215141 | -0.982177436 | 0.007343547 | 0.043081663 | Down |
| A | chr19 | <i>SLC27A1</i>  | 0.313704006 | -1.672524143 | 7.64E-05    | 0.001803195 | Down |
| A | chr19 | <i>UBA2</i>     | 1.915957551 | 0.938065598  | 0.005588698 | 0.035602377 | Up   |
| A | chr2  | <i>CNPPD1</i>   | 0.540254444 | -0.888289061 | 0.00500258  | 0.033134552 | Down |
| A | chr19 | <i>DPP9</i>     | 0.36308312  | -1.461628236 | 1.48E-05    | 0.000526067 | Down |
| A | chr8  | <i>EPPK1</i>    | 0.31558917  | -1.663880398 | 0.001112441 | 0.011805436 | Down |
| A | chr2  | <i>IFIH1</i>    | 1.86259183  | 0.897311556  | 0.004829808 | 0.032413103 | Up   |
| A | chr1  | <i>ZMYM6</i>    | 2.115370159 | 1.080910136  | 0.002290791 | 0.019454587 | Up   |
| A | chr12 | <i>MDM2</i>     | 2.423239828 | 1.276937195  | 0.000611071 | 0.007850699 | Up   |
| A | chr1  | <i>LRRC52</i>   | 0           | #NAME?       | 0.00082515  | 0.009684656 | Down |
| A | chrX  | <i>SNORA69</i>  | 0.143454717 | -2.801332692 | 0.000214829 | 0.003675285 | Down |
| A | chr3  | <i>IQCB1</i>    | 3.230639579 | 1.691819808  | 5.53E-05    | 0.001403862 | Up   |
| A | chr1  | <i>IPO13</i>    | 0.397218677 | -1.331994636 | 0.0001987   | 0.003476725 | Down |
| A | chr16 | <i>RPL3L</i>    | 0.022377187 | -5.481827477 | 0.000432596 | 0.006152209 | Down |
| A | chr3  | <i>TMEM115</i>  | 0.332998779 | -1.586411207 | 2.26E-05    | 0.000716304 | Down |
| A | chr10 | <i>PRKG1</i>    | 1.965194078 | 0.974671797  | 0.002617207 | 0.021298259 | Up   |

|   |       |                 |             |              |             |             |      |
|---|-------|-----------------|-------------|--------------|-------------|-------------|------|
| A | chrX  | <i>EFNB1</i>    | 0.366172553 | -1.449404438 | 0.006596074 | 0.040021924 | Down |
| A | chr19 | <i>ZNF507</i>   | 2.382907573 | 1.252722994  | 0.00082202  | 0.009666511 | Up   |
| A | chr1  | <i>RNPC3</i>    | 2.202010395 | 1.13882128   | 0.004399152 | 0.03044652  | Up   |
| A | chr4  | <i>SLC4A4</i>   | 0.076129179 | -3.715406661 | 5.34E-05    | 0.00136893  | Down |
| A | chr10 | <i>WAPAL</i>    | 2.010314395 | 1.007421144  | 2.84E-05    | 0.000865303 | Up   |
| A | chr16 | <i>RNF166</i>   | 0.406814082 | -1.297558474 | 0.000296742 | 0.004661106 | Down |
| A | chr15 | <i>MEIS2</i>    | 0.029425589 | -5.086784884 | 1.22E-07    | 1.50E-05    | Down |
| A | chr5  | <i>CDK7</i>     | 3.032687206 | 1.600596705  | 0.000112482 | 0.002330763 | Up   |
| A | chr19 | <i>GTF2F1</i>   | 2.432128623 | 1.282219527  | 0.00024358  | 0.004039965 | Up   |
| A | chr1  | <i>RPS6KA1</i>  | 0.539173403 | -0.891178764 | 0.000129611 | 0.002575057 | Down |
| A | chr3  | <i>ACAA1</i>    | 0.370880352 | -1.430974255 | 4.71E-05    | 0.001252313 | Down |
| A | chr3  | <i>CHMP2B</i>   | 2.67285522  | 1.418381694  | 0.000103231 | 0.002205354 | Up   |
| A | chr22 | <i>MED15</i>    | 0.352062895 | -1.506094912 | 7.61E-05    | 0.001803113 | Down |
| A | chr10 | <i>TCTN3</i>    | 0.363391064 | -1.460405153 | 0.008695779 | 0.048548332 | Down |
| A | chr7  | <i>GPC2</i>     | 0.314943824 | -1.666833572 | 0.003447559 | 0.025759006 | Down |
| A | chr3  | <i>ZNF445</i>   | 2.022692722 | 1.016277169  | 0.00114851  | 0.012072143 | Up   |
| A | chr2  | <i>SLC39A10</i> | 2.035961841 | 1.025710522  | 0.000366449 | 0.005460338 | Up   |
| A | chr6  | <i>ANKS1A</i>   | 0.593695799 | -0.752204191 | 0.002804325 | 0.022238668 | Down |
| A | chr10 | <i>PSD</i>      | 0.21786008  | -2.198526227 | 0.003769588 | 0.027381431 | Down |
| A | chr12 | <i>DNM1L</i>    | 2.248390304 | 1.168892498  | 5.98E-06    | 0.000266834 | Up   |
| A | chr6  | <i>LTB</i>      | 0.210682003 | -2.246861014 | 0.001621216 | 0.015412774 | Down |
| A | chr14 | <i>PCK2</i>     | 0.579752425 | -0.786491146 | 0.001296882 | 0.013146525 | Down |
| A | chr9  | <i>RPS6</i>     | 1.798550482 | 0.846834654  | 0.000912534 | 0.010312821 | Up   |
| A | chr9  | <i>ATP8B5P</i>  | 2.131720386 | 1.092018215  | 0.004600574 | 0.031424016 | Up   |
| A | chr3  | <i>PLXND1</i>   | 0.442376101 | -1.176654647 | 0.000112685 | 0.002331034 | Down |
| A | chr5  | <i>ZNF300</i>   | Inf         | Inf          | 0.007300856 | 0.042958283 | Up   |
| A | chr10 | <i>DUSP5</i>    | 0.404497328 | -1.305797924 | 0.004826776 | 0.032409416 | Down |
| A | chr6  | <i>PHIP</i>     | 2.209514311 | 1.143729275  | 2.28E-06    | 0.000131231 | Up   |
| A | chr12 | <i>WBP11</i>    | 0.492702938 | -1.021210019 | 0.000954582 | 0.010613425 | Down |
| A | chr14 | <i>FKBP3</i>    | 2.024064442 | 1.017255223  | 0.001330037 | 0.013385486 | Up   |
| A | chr13 | <i>UTP14C</i>   | 4.814585345 | 2.267411552  | 9.72E-07    | 7.08E-05    | Up   |
| A | chrX  | <i>ZDHC9</i>    | 0.464315516 | -1.106822603 | 0.005558128 | 0.035462012 | Down |
| A | chr5  | <i>REEP5</i>    | 0.403986944 | -1.307619427 | 1.63E-05    | 0.000564801 | Down |
| A | chr5  | <i>TIFAB</i>    | 0.185391421 | -2.431353607 | 2.02E-08    | 3.76E-06    | Down |
| A | chr5  | <i>NPM1</i>     | 5.873855975 | 2.554307892  | 2.23E-05    | 0.000710384 | Up   |
| A | chr8  | <i>COP5</i>     | 2.020955857 | 1.01503781   | 0.00630324  | 0.03879123  | Up   |
| A | chr12 | <i>HIST4H4</i>  | 0.048519727 | -4.365284756 | 1.89E-06    | 0.000114758 | Down |
| A | chr13 | <i>CDK8</i>     | 1.863625265 | 0.898111794  | 0.003522244 | 0.026092993 | Up   |
| A | chr10 | <i>LZTS2</i>    | 0.470957405 | -1.086331511 | 0.004526365 | 0.030998236 | Down |
| A | chr11 | <i>PRKRIR</i>   | 5.597770365 | 2.484852305  | 4.11E-06    | 0.000204912 | Up   |
| A | chr19 | <i>ZNF526</i>   | 0.188985047 | -2.403656007 | 5.62E-10    | 1.88E-07    | Down |
| A | chr19 | <i>ZNF527</i>   | 2.329374679 | 1.219942715  | 0.002478193 | 0.020473324 | Up   |
| A | chr13 | <i>NDFIP2</i>   | 3.281436374 | 1.71432746   | 0.003935188 | 0.02816119  | Up   |
| A | chr6  | <i>DEK</i>      | 2.192701304 | 1.132709297  | 0.002164922 | 0.018789048 | Up   |

|   |       |          |             |              |             |             |      |
|---|-------|----------|-------------|--------------|-------------|-------------|------|
| A | chr9  | ZDHH12   | 0.069121701 | -3.85471746  | 0.000388529 | 0.005691882 | Down |
| A | chr3  | IRAK2    | 0.239038865 | -2.064682895 | 0.003254984 | 0.024788394 | Down |
| A | chr10 | WBP1L    | 0.482759948 | -1.050622106 | 0.005917358 | 0.037009714 | Down |
| A | chr8  | PCMTD1   | 1.809235737 | 0.855380399  | 0.005558514 | 0.035462012 | Up   |
| A | chr9  | FAM102A  | 0.347598646 | -1.524505631 | 0.002276804 | 0.019360996 | Down |
| A | chr17 | ENTHD2   | 0.164299972 | -2.605595861 | 0.004511294 | 0.03092748  | Down |
| A | chr13 | TPT1     | 0.628872417 | -0.669160736 | 0.002938229 | 0.022979411 | Down |
| A | chr17 | BAHCC1   | 0.261400168 | -1.935668028 | 7.84E-09    | 1.79E-06    | Down |
| A | chr2  | FZD7     | 0.346989228 | -1.527037218 | 0.000568985 | 0.00748576  | Down |
| A | chr1  | RNPEP    | 0.52310183  | -0.934836279 | 0.000265022 | 0.004281352 | Down |
| A | chr10 | SFR1     | 5.59801671  | 2.484915793  | 0.007343653 | 0.043081663 | Up   |
| A | chr3  | IP6K1    | 0.599801786 | -0.737442277 | 0.00285203  | 0.02245329  | Down |
| A | chr6  | EHMT2    | 0.523604312 | -0.933451116 | 0.000106662 | 0.002245584 | Down |
| A | chr2  | MRPL19   | 3.777768504 | 1.917534298  | 0.001121816 | 0.011885604 | Up   |
| A | chr4  | PLRG1    | 1.67386486  | 0.743183056  | 0.008675427 | 0.048535612 | Up   |
| A | chr19 | PRR12    | 0.130511537 | -2.937750753 | 3.19E-05    | 0.000940052 | Down |
| A | chr16 | THUMPD1  | 2.065425323 | 1.0464389    | 0.003149558 | 0.024156689 | Up   |
| A | chr6  | RUNX2    | 0.44220212  | -1.177222152 | 0.002763424 | 0.022007912 | Down |
| A | chr12 | ATP6V0A2 | 0.513595119 | -0.961296602 | 0.008232547 | 0.046830043 | Down |
| A | chr1  | RNF2     | 1.948774077 | 0.962566847  | 0.000684732 | 0.008439857 | Up   |
| A | chr2  | ADAM17   | 2.054686815 | 1.038918508  | 0.004637136 | 0.031538137 | Up   |
| A | chr3  | H1FX     | 0.101736189 | -3.297095135 | 7.97E-07    | 5.98E-05    | Down |
| A | chr1  | LRRC8C   | 0.456448655 | -1.131475512 | 0.001993036 | 0.017697345 | Down |
| A | chr17 | JUP      | 0.275051295 | -1.862227398 | 2.56E-05    | 0.000791433 | Down |
| A | chr17 | FAM134C  | 0.442382971 | -1.176632244 | 4.08E-05    | 0.001149943 | Down |
| A | chr11 | ZNF143   | 2.641878309 | 1.401564014  | 0.000108397 | 0.002267483 | Up   |
| A | chr17 | GAA      | 0.365171253 | -1.453354898 | 0.001263734 | 0.012962241 | Down |
| A | chr11 | NRGN     | 0.217114402 | -2.203472665 | 1.35E-06    | 9.18E-05    | Down |
| A | chr4  | LAP3     | 2.426419955 | 1.278829268  | 0.003693198 | 0.026916423 | Up   |
| A | chr7  | LRCH4    | 0.263431986 | -1.924497567 | 4.93E-12    | 3.06E-09    | Down |
| A | chr1  | SNORD76  | Inf         | Inf          | 0.001620477 | 0.015412774 | Up   |
| A | chr14 | LRP10    | 0.284149238 | -1.815279249 | 8.48E-11    | 3.57E-08    | Down |
| A | chr4  | COPS4    | 1.744349353 | 0.802689008  | 0.007193221 | 0.042524054 | Up   |
| A | chr5  | DAP      | 0.305880802 | -1.708958532 | 0.001618041 | 0.015412774 | Down |
| A | chrX  | ZXDB     | 0.206038345 | -2.27901524  | 0.001499799 | 0.014555297 | Down |
| A | chr2  | TNS1     | 0.294107997 | -1.765582081 | 0.002500381 | 0.020604465 | Down |
| A | chr12 | CAPRIN2  | 2.403042317 | 1.264862054  | 0.007573565 | 0.044132923 | Up   |
| A | chr19 | ZNF544   | 3.103680881 | 1.633980228  | 0.008614567 | 0.048260059 | Up   |
| A | chr14 | KIAA0247 | 0.449390326 | -1.153959027 | 0.002365333 | 0.019804166 | Down |
| A | chr2  | EML4     | 1.751698962 | 0.808754862  | 0.001432294 | 0.01403584  | Up   |
| A | chr19 | MBOAT7   | 0.314098593 | -1.670710617 | 2.47E-07    | 2.56E-05    | Down |
| A | chr2  | EML6     | 2.33564505  | 1.223821043  | 0.001101978 | 0.011751735 | Up   |
| A | chr7  | TSC22D4  | 0.303400666 | -1.720703845 | 9.96E-10    | 2.95E-07    | Down |
| A | chr10 | SUFU     | 0.36271674  | -1.463084765 | 0.003359152 | 0.025330451 | Down |

|   |       |                 |             |              |             |             |      |
|---|-------|-----------------|-------------|--------------|-------------|-------------|------|
| A | chr16 | <i>SH2B1</i>    | 0.329737512 | -1.600610074 | 1.60E-08    | 3.11E-06    | Down |
| A | chr11 | <i>CARNS1</i>   | 0.272879986 | -1.873661508 | 0.000644221 | 0.00810899  | Down |
| A | chr19 | <i>LSM4</i>     | 0.444513099 | -1.169702162 | 0.002177925 | 0.018847466 | Down |
| A | chr15 | <i>VPS18</i>    | 0.363115085 | -1.461501231 | 1.38E-06    | 9.18E-05    | Down |
| A | chr3  | <i>ARL6</i>     | 9.774507504 | 3.289024013  | 4.30E-05    | 0.001184956 | Up   |
| A | chr11 | <i>DYNC2H1</i>  | 1.912678827 | 0.93559464   | 0.000758004 | 0.009093959 | Up   |
| A | chr17 | <i>NFE2L1</i>   | 0.575143093 | -0.798007159 | 0.003898316 | 0.027943283 | Down |
| A | chr1  | <i>CPT2</i>     | 0.493050364 | -1.020193072 | 0.003226368 | 0.024599168 | Down |
| A | chr2  | <i>MRPL35</i>   | Inf         | Inf          | 0.002029194 | 0.01790877  | Up   |
| A | chr1  | <i>SNORD81</i>  | 4.992683616 | 2.319815487  | 0.005130993 | 0.033649857 | Up   |
| A | chr13 | <i>RNF17</i>    | 13.69697137 | 3.775785019  | 0.004249581 | 0.029772312 | Up   |
| A | chr10 | <i>CCDC6</i>    | 0.497445084 | -1.007390828 | 0.002583714 | 0.021104644 | Down |
| A | chr9  | <i>ABCA2</i>    | 0.471135321 | -1.0857866   | 0.004443723 | 0.030641266 | Down |
| A | chr9  | <i>GKAP1</i>    | 23.1452861  | 4.532646491  | 3.99E-09    | 9.81E-07    | Up   |
| A | chr19 | <i>MIDN</i>     | 0.125675821 | -2.992220984 | 1.65E-06    | 0.000104536 | Down |
| A | chr19 | <i>ZNF556</i>   | 9.479090616 | 3.24474866   | 0.000761166 | 0.009115132 | Up   |
| A | chr19 | <i>ZNF558</i>   | 4.155262642 | 2.054939668  | 0.003843369 | 0.027708451 | Up   |
| A | chr17 | <i>PFAFH1B1</i> | 1.79398403  | 0.843167047  | 0.000504053 | 0.00687248  | Up   |
| A | chr2  | <i>ODC1</i>     | 1.790716072 | 0.840536608  | 0.003838343 | 0.027695902 | Up   |
| A | chr12 | <i>RNF10</i>    | 0.369732337 | -1.435446867 | 0.000731241 | 0.008857951 | Down |
| A | chr19 | <i>CRTC1</i>    | 0.266112454 | -1.909892066 | 0.006686194 | 0.040330358 | Down |
| A | chr1  | <i>IVNS1ABP</i> | 1.560329958 | 0.641851143  | 0.006113018 | 0.03796062  | Up   |
| A | chr14 | <i>CTAGE5</i>   | 2.240472364 | 1.163802931  | 0.006293183 | 0.038747601 | Up   |
| A | chr11 | <i>MALAT1</i>   | 1.778406213 | 0.830584894  | 0.003801989 | 0.02751309  | Up   |
| A | chr15 | <i>KATNBL1</i>  | 3.879924871 | 1.956028717  | 0.000195439 | 0.003443799 | Up   |
| A | chr1  | <i>RUNX3</i>    | 0.166625223 | -2.585321293 | 6.17E-07    | 4.97E-05    | Down |
| A | chr10 | <i>HELLS</i>    | 2.153380824 | 1.106603481  | 0.001065951 | 0.011478232 | Up   |
| A | chr11 | <i>RDX</i>      | 1.878106404 | 0.909278801  | 0.00119401  | 0.012408771 | Up   |
| A | chr18 | <i>VPS4B</i>    | 1.94014132  | 0.956161742  | 0.0006412   | 0.008094376 | Up   |
| A | chr5  | <i>EBF1</i>     | 0.303069344 | -1.722280167 | 0.002172978 | 0.018833916 | Down |
| A | chr1  | <i>PHC2</i>     | 0.394052668 | -1.343539624 | 2.39E-05    | 0.000749168 | Down |
| A | chr7  | <i>FLJ40852</i> | 0.026169405 | -5.255975043 | 2.62E-08    | 4.44E-06    | Down |
| A | chr16 | <i>VPS35</i>    | 2.12578577  | 1.087996214  | 0.000168866 | 0.003108893 | Up   |
| A | chr1  | <i>ARHGAP29</i> | 7.295591294 | 2.867024911  | 0.000158336 | 0.002965223 | Up   |
| A | chr14 | <i>RNF31</i>    | 0.418767172 | -1.255779745 | 3.68E-05    | 0.00106103  | Down |
| A | chr7  | <i>MPP6</i>     | 2.105767669 | 1.074346271  | 5.76E-05    | 0.001453498 | Up   |
| A | chr5  | <i>RASGRF2</i>  | 0.103682552 | -3.26975496  | 0.002314795 | 0.019526298 | Down |
| A | chr4  | <i>KIAA1239</i> | 0           | #NAME?       | 6.82E-05    | 0.001668239 | Down |
| A | chr1  | <i>JUN</i>      | 0.415473777 | -1.267170672 | 0.000530961 | 0.007130282 | Down |
| A | chr9  | <i>STRBP</i>    | 1.685325865 | 0.75302757   | 0.002156575 | 0.018740352 | Up   |
| A | chr2  | <i>SEMA4C</i>   | 0.357378407 | -1.484475628 | 0.002671543 | 0.021605735 | Down |
| A | chr19 | <i>ZNF569</i>   | 3.124419351 | 1.643588101  | 0.000181753 | 0.003276418 | Up   |
| A | chr15 | <i>SLC30A4</i>  | 2.658111433 | 1.410401586  | 0.001104124 | 0.011755411 | Up   |
| A | chr3  | <i>PSMD6</i>    | 2.128163205 | 1.089608793  | 0.001834681 | 0.016723527 | Up   |

|   |       |                     |             |              |             |             |      |
|---|-------|---------------------|-------------|--------------|-------------|-------------|------|
| A | chr2  | <i>LBH</i>          | 0.401775427 | -1.315538764 | 0.005662595 | 0.035932841 | Down |
| A | chr14 | <i>VRK1</i>         | 2.010697868 | 1.007696315  | 0.002182214 | 0.01886387  | Up   |
| A | chr3  | <i>MECOM</i>        | 2.457778248 | 1.297354755  | 9.72E-07    | 7.08E-05    | Up   |
| A | chr4  | <i>FAM92A1P2</i>    | 2.73658983  | 1.452379215  | 0.006603515 | 0.040021924 | Up   |
| A | chr7  | <i>ABCB5</i>        | 0           | #NAME?       | 0.001286915 | 0.013092836 | Down |
| A | chr20 | <i>XRN2</i>         | 1.657330084 | 0.728860968  | 0.002537632 | 0.02084563  | Up   |
| A | chr17 | <i>POLR2A</i>       | 0.399787214 | -1.322695761 | 0.008229056 | 0.046830043 | Down |
| A | chr16 | <i>PIEZO1</i>       | 0.314564432 | -1.66857254  | 0.000234194 | 0.003934648 | Down |
| A | chr6  | <i>DDAH2</i>        | 0.335208188 | -1.576870704 | 0.000688316 | 0.008471932 | Down |
| A | chr15 | <i>SERF2</i>        | 0.483067483 | -1.049703351 | 8.39E-06    | 0.000348581 | Down |
| A | chr11 | <i>RNF26</i>        | 0.247863049 | -2.012384879 | 0.00149075  | 0.014499824 | Down |
| A | chr19 | <i>ZNF571</i>       | 2.864990882 | 1.518530548  | 0.00155508  | 0.014925338 | Up   |
| A | chr19 | <i>ZNF574</i>       | 0.310762029 | -1.686117856 | 7.76E-07    | 5.86E-05    | Down |
| A | chr12 | <i>SH2B3</i>        | 0.434191953 | -1.203595106 | 0.00130325  | 0.013176854 | Down |
| A | chr19 | <i>ZNF579</i>       | 0.267974712 | -1.899831232 | 0.00505346  | 0.033398891 | Down |
| A | chr3  | <i>LRRFIP2</i>      | 2.164105982 | 1.113771153  | 0.00041178  | 0.005926098 | Up   |
| A | chr1  | <i>LOC100130331</i> | 0.401129546 | -1.317859861 | 7.31E-06    | 0.000314826 | Down |
| A | chr17 | <i>FAM171A2</i>     | 0.155296514 | -2.686902647 | 8.23E-06    | 0.000343356 | Down |
| A | chr19 | <i>GPI</i>          | 0.638064729 | -0.648225307 | 0.005050664 | 0.033397323 | Down |
| A | chr6  | <i>PPP1R10</i>      | 0.575050613 | -0.798239156 | 0.001261374 | 0.012962241 | Down |
| A | chr10 | <i>FBXW4</i>        | 0.528776371 | -0.919270384 | 0.004859157 | 0.032526451 | Down |
| A | chr6  | <i>PPP1R18</i>      | 0.313312297 | -1.6743267   | 2.81E-07    | 2.79E-05    | Down |
| A | chr3  | <i>RPL22L1</i>      | 1.781356044 | 0.8329759    | 0.004798773 | 0.032321151 | Up   |
| A | chr10 | <i>TM9SF3</i>       | 2.006113145 | 1.004402976  | 0.000483966 | 0.006656699 | Up   |
| A | chr7  | <i>EPHB6</i>        | 0.345373458 | -1.53377088  | 0.004263954 | 0.029793804 | Down |
| A | chr1  | <i>HIST3H2A</i>     | 0.188647459 | -2.406235427 | 2.91E-07    | 2.83E-05    | Down |
| A | chr7  | <i>FIGNL1</i>       | 3.060321694 | 1.613683314  | 4.81E-05    | 0.001272235 | Up   |
| A | chr1  | <i>VCAM1</i>        | 5.999985271 | 2.584958959  | 6.30E-09    | 1.49E-06    | Up   |
| A | chr1  | <i>NOL9</i>         | 0.192572353 | -2.3765275   | 0.004375014 | 0.030343817 | Down |
| A | chr8  | <i>PHF20L1</i>      | 2.368367865 | 1.243893184  | 7.24E-07    | 5.56E-05    | Up   |
| A | chr21 | <i>USP16</i>        | 2.05972757  | 1.042453532  | 0.001101913 | 0.011751735 | Up   |
| A | chr1  | <i>SLC39A1</i>      | 0.509926251 | -0.971639484 | 0.002303573 | 0.019497038 | Down |
| A | chr11 | <i>SCYL1</i>        | 0.506603771 | -0.981070278 | 0.000949998 | 0.010601638 | Down |
| A | chr6  | <i>ARHGAP18</i>     | 1.905614559 | 0.930256341  | 0.001123204 | 0.011890661 | Up   |
| A | chr15 | <i>CLN6</i>         | 0.33246248  | -1.588736559 | 1.85E-05    | 0.000619977 | Down |
| A | chr20 | <i>CRNKL1</i>       | 1.822915231 | 0.866247475  | 0.002839138 | 0.022396643 | Up   |
| A | chr1  | <i>SF3A3</i>        | 2.324838768 | 1.217130666  | 7.23E-05    | 0.001737558 | Up   |
| A | chr5  | <i>MCTP1</i>        | 2.604168175 | 1.38082262   | 2.82E-07    | 2.79E-05    | Up   |
| A | chr6  | <i>TXNDC5</i>       | 0           | #NAME?       | 0.005021074 | 0.033235337 | Down |
| A | chr17 | <i>BLMH</i>         | 1.796462615 | 0.845158913  | 0.001626739 | 0.015433399 | Up   |
| A | chr2  | <i>CCDC142</i>      | 0.211899355 | -2.2385489   | 0.005449101 | 0.034961686 | Down |
| A | chr1  | <i>VAMP4</i>        | 2.07110967  | 1.05040395   | 0.006864545 | 0.041061915 | Up   |
| A | chr19 | <i>BBC3</i>         | 0.252799016 | -1.98393725  | 0.006452474 | 0.039320326 | Down |
| A | chr2  | <i>SF3B1</i>        | 1.623653697 | 0.699243958  | 0.002684448 | 0.021674717 | Up   |

|   |       |                |             |              |             |             |      |
|---|-------|----------------|-------------|--------------|-------------|-------------|------|
| A | chr19 | <i>POLD1</i>   | 0.443388228 | -1.173357626 | 0.003051407 | 0.023596407 | Down |
| A | chr9  | <i>CDC37L1</i> | 2.331785556 | 1.221435116  | 0.001149024 | 0.012072143 | Up   |
| A | chr18 | <i>ZNF407</i>  | 1.901522898 | 0.927155312  | 0.001109328 | 0.011781984 | Up   |
| A | chr1  | <i>SLC9A1</i>  | 0.177939772 | -2.490539088 | 1.68E-05    | 0.000578128 | Down |
| A | chr4  | <i>C4orf27</i> | 2.491795593 | 1.317185726  | 0.000119015 | 0.002427358 | Up   |
| A | chr20 | <i>MKKS</i>    | 3.39342623  | 1.762742651  | 0.00054251  | 0.007241946 | Up   |
| A | chr1  | <i>LAPTM5</i>  | 0.39070007  | -1.355866579 | 5.94E-06    | 0.000266834 | Down |
| A | chr15 | <i>KLF13</i>   | 0.427263675 | -1.226801427 | 8.24E-05    | 0.001907767 | Down |
| A | chr20 | <i>TUBB1</i>   | 0.324067543 | -1.625633561 | 1.31E-05    | 0.000476915 | Down |
| A | chr16 | <i>FBRS</i>    | 0.213226717 | -2.229539877 | 1.46E-07    | 1.69E-05    | Down |
| A | chr4  | <i>ANTXR2</i>  | 1.883943435 | 0.913755649  | 0.003627725 | 0.026617592 | Up   |
| A | chr20 | <i>KCNG1</i>   | 0.033912063 | -4.882057636 | 2.79E-11    | 1.45E-08    | Down |
| A | chr3  | <i>CACNA1D</i> | 0.298727222 | -1.743099385 | 0.002364933 | 0.019804166 | Down |
| A | chr11 | <i>MRE11A</i>  | 2.337883639 | 1.225203126  | 0.000688632 | 0.008471932 | Up   |
| A | chr3  | <i>BSN</i>     | 0.383887886 | -1.381243058 | 4.52E-06    | 0.000220355 | Down |
| A | chr11 | <i>UCP2</i>    | 0.267761984 | -1.900976949 | 1.47E-06    | 9.67E-05    | Down |
| A | chr11 | <i>UCP3</i>    | 0.230272089 | -2.118588538 | 2.12E-05    | 0.00068692  | Down |
| A | chr10 | <i>PCDH15</i>  | 0.042536432 | -4.555157179 | 0.001132687 | 0.011965069 | Down |
| A | chr2  | <i>EPHA4</i>   | 0.090570157 | -3.46482043  | 1.76E-06    | 0.000107931 | Down |
| A | chr1  | <i>SF3B4</i>   | 0.274849528 | -1.863286093 | 1.45E-07    | 1.69E-05    | Down |
| A | chr21 | <i>PFKL</i>    | 0.595590959 | -0.74760624  | 0.005934181 | 0.037061659 | Down |
| A | chr3  | <i>BCL6</i>    | 0.506116561 | -0.982458412 | 0.006976254 | 0.041580388 | Down |
| A | chrX  | <i>FRMD8P1</i> | 0.408140842 | -1.292861009 | 0.004250309 | 0.029772312 | Down |
| A | chr17 | <i>GIT1</i>    | 0.4591963   | -1.122817078 | 0.002192654 | 0.018897192 | Down |
| A | chr8  | <i>HOOK3</i>   | 2.388908398 | 1.256351535  | 1.50E-05    | 0.000532599 | Up   |
| A | chr12 | <i>RFX4</i>    | 0.046523387 | -4.425900044 | 7.54E-05    | 0.001793399 | Down |
| A | chr17 | <i>TP53</i>    | 0.30071539  | -1.733529391 | 1.36E-08    | 2.69E-06    | Down |
| A | chr5  | <i>NSUN2</i>   | 1.887862653 | 0.916753809  | 0.000481286 | 0.006633814 | Up   |
| A | chr2  | <i>IKZF2</i>   | 1.602521242 | 0.68034348   | 0.006353696 | 0.038991441 | Up   |
| A | chr1  | <i>TPR</i>     | 1.940143757 | 0.956163555  | 6.63E-05    | 0.001629902 | Up   |
| A | chr17 | <i>G6PC3</i>   | 0.425448368 | -1.232944036 | 0.000469703 | 0.006543255 | Down |
| A | chr9  | <i>ERCC6L2</i> | 2.911363409 | 1.541694934  | 2.23E-05    | 0.000710384 | Up   |
| A | chr3  | <i>PFN2</i>    | 5.334797499 | 2.41543351   | 0.000371358 | 0.005520888 | Up   |
| A | chr19 | <i>LPHN1</i>   | 0.512446581 | -0.964526474 | 0.001703143 | 0.015868045 | Down |
| A | chr2  | <i>CAB39</i>   | 1.673393174 | 0.742776455  | 0.003241313 | 0.024698695 | Up   |
| A | chr6  | <i>REV3L</i>   | 1.716824117 | 0.779742248  | 0.001713714 | 0.015948418 | Up   |
| A | chr11 | <i>VPS51</i>   | 0.499330256 | -1.001933767 | 0.003599204 | 0.026467835 | Down |
| A | chr12 | <i>ACVRL1</i>  | 0.091783194 | -3.445626171 | 0.000135287 | 0.002671561 | Down |
| A | chr10 | <i>CALHM2</i>  | 0.346954693 | -1.527180815 | 8.63E-05    | 0.001958548 | Down |
| A | chr17 | <i>HDAC5</i>   | 0.442256419 | -1.177045013 | 4.97E-05    | 0.001295503 | Down |
| A | chr1  | <i>FNBP1L</i>  | 2.445028066 | 1.289851026  | 7.88E-06    | 0.00033307  | Up   |
| A | chr15 | <i>CLPX</i>    | 2.164241154 | 1.113861262  | 8.17E-05    | 0.001898008 | Up   |
| A | chr9  | <i>CTNNA1</i>  | 12.93915596 | 3.693671607  | 0.002321829 | 0.019560033 | Up   |
| A | chr19 | <i>UBL5</i>    | 2.102042461 | 1.071791812  | 0.004552497 | 0.031160849 | Up   |

|   |       |                     |             |              |             |             |      |
|---|-------|---------------------|-------------|--------------|-------------|-------------|------|
| A | chr19 | <i>PIP5K1C</i>      | 0.500459162 | -0.998675748 | 0.001668084 | 0.015683671 | Down |
| A | chr7  | <i>GATAD1</i>       | 2.601796179 | 1.379507948  | 4.31E-05    | 0.001184956 | Up   |
| A | chr19 | <i>MYADM</i>        | 0.077244144 | -3.694430633 | 0.000378912 | 0.005582588 | Down |
| A | chr1  | <i>EPHB2</i>        | 0.29555392  | -1.758506741 | 1.20E-06    | 8.39E-05    | Down |
| A | chr2  | <i>MTERFD2</i>      | 5.885295316 | 2.55711481   | 0.001437707 | 0.014057222 | Up   |
| A | chr2  | <i>CWC22</i>        | 2.016519914 | 1.011867653  | 0.001052127 | 0.011397025 | Up   |
| A | chr6  | <i>ABCF1</i>        | 0.533143597 | -0.907403933 | 0.000759254 | 0.009100587 | Down |
| A | chr5  | <i>SQSTM1</i>       | 0.569452711 | -0.812352053 | 0.003016107 | 0.023420132 | Down |
| A | chr1  | <i>HIST3H3</i>      | 0.129292528 | -2.951289194 | 1.14E-17    | 1.66E-14    | Down |
| A | chr3  | <i>PPP2R3A</i>      | 1.777905033 | 0.830178265  | 0.004930146 | 0.032850022 | Up   |
| A | chr8  | <i>LOC100500773</i> | 2.190808472 | 1.131463365  | 0.001764731 | 0.016233288 | Up   |
| A | chr5  | <i>SLC36A1</i>      | 0.359091681 | -1.477575866 | 0.002057139 | 0.018130882 | Down |
| A | chr1  | <i>HIST2H2AB</i>    | 0.33898373  | -1.560712066 | 4.18E-07    | 3.74E-05    | Down |
| A | chr1  | <i>ABCD3</i>        | 2.062097195 | 1.044112335  | 0.000856575 | 0.009925418 | Up   |
| A | chr19 | <i>UQCR11</i>       | 0.139800903 | -2.838554414 | 0.000125118 | 0.002508703 | Down |
| A | chr8  | <i>ATP6V1H</i>      | 2.203563017 | 1.139838155  | 5.97E-05    | 0.001500736 | Up   |
| A | chr12 | <i>RECQL</i>        | 3.246836462 | 1.69903472   | 0.00391465  | 0.028029583 | Up   |
| A | chr2  | <i>GLS</i>          | 2.166329249 | 1.115252527  | 8.79E-06    | 0.000358427 | Up   |
| A | chr3  | <i>CMTM7</i>        | 0.398746403 | -1.326456591 | 4.21E-08    | 6.46E-06    | Down |
| A | chr16 | <i>UBALD1</i>       | 0.199940081 | -2.322360381 | 1.94E-06    | 0.000117057 | Down |
| A | chr19 | <i>IER2</i>         | 0.262453187 | -1.929867978 | 0.000785514 | 0.009312733 | Down |
| A | chr12 | <i>RAP1B</i>        | 3.196629021 | 1.676551324  | 1.72E-06    | 0.000107136 | Up   |
| A | chr12 | <i>KDM2B</i>        | 0.529459854 | -0.917406797 | 0.000708981 | 0.008643468 | Down |
| A | chr6  | <i>TFAP2A</i>       | 0.011675054 | -6.420426932 | 9.77E-07    | 7.08E-05    | Down |
| A | chr11 | <i>IPO7</i>         | 1.985660771 | 0.989619175  | 0.000168112 | 0.003107191 | Up   |
| A | chr3  | <i>ZDHHC3</i>       | 0.533505284 | -0.906425535 | 0.000492526 | 0.006738938 | Down |
| A | chr4  | <i>LCORL</i>        | 1.731787095 | 0.792261577  | 0.003440618 | 0.025755636 | Up   |
| A | chr1  | <i>RIT1</i>         | 3.286212708 | 1.716425865  | 0.007222996 | 0.042633116 | Up   |
| A | chr1  | <i>HIST2H2BE</i>    | 0.335392812 | -1.576076327 | 0.000191193 | 0.003414004 | Down |
| A | chr1  | <i>HIST2H2BF</i>    | 2.481720376 | 1.311340571  | 0.000246403 | 0.00407365  | Up   |
| A | chr11 | <i>ZBTB16</i>       | 0.348955928 | -1.518883253 | 1.35E-05    | 0.000487856 | Down |
| A | chr7  | <i>ZNF273</i>       | 3.834728831 | 1.939124563  | 0.000177815 | 0.003237135 | Up   |
| A | chr19 | <i>ZIK1</i>         | 3.839210016 | 1.940809482  | 0.000987642 | 0.010897458 | Up   |
| A | chr5  | <i>ZNF879</i>       | 4.012825691 | 2.00461849   | 0.008286732 | 0.047036732 | Up   |
| A | chr2  | <i>TUBA3D</i>       | 0.169406412 | -2.561439612 | 0.003302162 | 0.025018993 | Down |
| A | chr15 | <i>TUBGCP5</i>      | 1.770031299 | 0.823774871  | 0.005186745 | 0.033834377 | Up   |
| A | chr12 | <i>HDAC7</i>        | 0.260821022 | -1.938867941 | 0.000269216 | 0.004333878 | Down |
| A | chr7  | <i>CARD11</i>       | 0.399809647 | -1.322614813 | 0.006521631 | 0.039704688 | Down |
| A | chr2  | <i>CLK1</i>         | 1.687993009 | 0.755308929  | 0.001881614 | 0.016973535 | Up   |
| A | chr22 | <i>SREBF2</i>       | 0.317806992 | -1.653777228 | 4.31E-05    | 0.001184956 | Down |
| A | chr12 | <i>NCAPD2</i>       | 0.56221718  | -0.830800554 | 0.000337822 | 0.005103688 | Down |
| A | chr11 | <i>UNC93B1</i>      | 0.355499032 | -1.492082463 | 1.44E-07    | 1.69E-05    | Down |
| A | chr4  | <i>ABCG2</i>        | 2.054514456 | 1.038797481  | 0.003790956 | 0.027484019 | Up   |
| A | chr11 | <i>CAPN1</i>        | 0.40925446  | -1.288929957 | 4.66E-05    | 0.001245137 | Down |

|   |       |                  |             |              |             |             |      |
|---|-------|------------------|-------------|--------------|-------------|-------------|------|
| A | chr11 | <i>APLNR</i>     | 0.026852625 | -5.218793071 | 0.003664357 | 0.026736082 | Down |
| A | chr17 | <i>FZD2</i>      | 0.135400347 | -2.884696662 | 0.005207186 | 0.033900009 | Down |
| A | chr1  | <i>HOOK1</i>     | 3.235293654 | 1.693896665  | 2.40E-06    | 0.000136944 | Up   |
| A | chr2  | <i>PTPN4</i>     | 2.138882687 | 1.096857356  | 9.42E-05    | 0.002074339 | Up   |
| A | chr11 | <i>LTBP3</i>     | 0.301594114 | -1.72931982  | 0.005849771 | 0.036745505 | Down |
| A | chr7  | <i>ZNF282</i>    | 0.543871296 | -0.878662809 | 0.00559326  | 0.035614058 | Down |
| A | chr17 | <i>KDM6B</i>     | 0.221252563 | -2.176233928 | 0.000529213 | 0.007114125 | Down |
| A | chr1  | <i>OBSCN</i>     | 0.198358156 | -2.333820379 | 0.006184512 | 0.038277117 | Down |
| A | chr9  | <i>PTPRD</i>     | 0.267184171 | -1.904093557 | 0.001428646 | 0.014021141 | Down |
| A | chr6  | <i>FBXO30</i>    | 2.653965823 | 1.408149792  | 0.000104823 | 0.002221189 | Up   |
| A | chr17 | <i>ADAM11</i>    | 0.204039226 | -2.293081564 | 1.03E-06    | 7.36E-05    | Down |
| A | chr9  | <i>PLAA</i>      | 1.864899405 | 0.899097812  | 0.000560669 | 0.007444972 | Up   |
| A | chr9  | <i>ZBTB6</i>     | 3.871270168 | 1.952806994  | 1.01E-07    | 1.29E-05    | Up   |
| A | chrX  | <i>UBQLN2</i>    | 0.549213949 | -0.864559827 | 0.00278967  | 0.02216285  | Down |
| A | chr10 | <i>MRPS16</i>    | 0.387081528 | -1.369290633 | 0.002644317 | 0.021442256 | Down |
| A | chr5  | <i>PTCD2</i>     | 8.726226802 | 3.125357971  | 8.74E-05    | 0.001971221 | Up   |
| A | chr12 | <i>CCND2</i>     | 0.533204851 | -0.907238189 | 0.000189717 | 0.003396954 | Down |
| A | chr3  | <i>SLC35G2</i>   | 0.2159298   | -2.211365737 | 0.000738421 | 0.008924643 | Down |
| A | chr12 | <i>OSBPL8</i>    | 2.176527643 | 1.122028343  | 5.98E-06    | 0.000266834 | Up   |
| A | chr1  | <i>KIRREL</i>    | 0.129710504 | -2.946632779 | 0.001304893 | 0.013183254 | Down |
| A | chr13 | <i>OLFM4</i>     | 0.073234431 | -3.771334094 | 0.007937922 | 0.045644798 | Down |
| A | chr7  | <i>ZNF746</i>    | 0.509774123 | -0.972069953 | 0.002234699 | 0.019117077 | Down |
| A | chr6  | <i>RXRБ</i>      | 0.466741369 | -1.099304752 | 5.22E-05    | 0.001345405 | Down |
| A | chr12 | <i>MFSD5</i>     | 0.340253577 | -1.555317767 | 0.000146717 | 0.002819189 | Down |
| A | chr1  | <i>DHRS3</i>     | 0.422126584 | -1.244252407 | 0.000119528 | 0.002432288 | Down |
| A | chr17 | <i>ARHGDIА</i>   | 0.554388715 | -0.851030204 | 0.000563851 | 0.007472023 | Down |
| A | chr20 | <i>GSS</i>       | 2.526272021 | 1.337009992  | 0.004806294 | 0.032322239 | Up   |
| A | chr6  | <i>SHPRH</i>     | 1.617798287 | 0.694031738  | 0.00874872  | 0.048700905 | Up   |
| A | chr13 | <i>EXOSC8</i>    | 2.425552897 | 1.278313642  | 0.000355949 | 0.005340468 | Up   |
| A | chr5  | <i>NADKD1</i>    | 1.830308061 | 0.87208649   | 0.00845678  | 0.047621377 | Up   |
| A | chr2  | <i>HNMT</i>      | 29.03907515 | 4.859923601  | 9.28E-07    | 6.88E-05    | Up   |
| A | chr10 | <i>ZMYND11</i>   | 1.702276938 | 0.767465763  | 0.002712149 | 0.021825941 | Up   |
| A | chr8  | <i>UBE2W</i>     | 1.78303414  | 0.834334326  | 0.004814425 | 0.03235978  | Up   |
| A | chrX  | <i>ZNF630</i>    | 3.609112365 | 1.85164406   | 0.006868874 | 0.041061915 | Up   |
| A | chr1  | <i>GLIS1</i>     | 0           | #NAME?       | 0.003576667 | 0.026361507 | Down |
| A | chr11 | <i>MTRNR2L8</i>  | 0.23984207  | -2.059843355 | 1.76E-08    | 3.32E-06    | Down |
| A | chr5  | <i>RANBP17</i>   | 2.384304646 | 1.253568583  | 0.001566606 | 0.015013879 | Up   |
| A | chrX  | <i>MTRNR2L10</i> | 0.194756192 | -2.360258898 | 2.32E-20    | 6.06E-17    | Down |
| A | chr9  | <i>FKTN</i>      | 4.978567882 | 2.315730801  | 0.000280717 | 0.004478215 | Up   |
| A | chr7  | <i>UBE2H</i>     | 0.36101446  | -1.469871471 | 0.000578176 | 0.007571291 | Down |
| A | chr14 | <i>CYP46A1</i>   | 0.021880566 | -5.514206108 | 0.00050965  | 0.006911658 | Down |
| A | chr2  | <i>ARID5A</i>    | 0.502644981 | -0.992388313 | 0.004618629 | 0.031481446 | Down |
| A | chr9  | <i>PTCH1</i>     | 0.570078006 | -0.810768752 | 0.004698823 | 0.031779135 | Down |
| A | chr2  | <i>SMC6</i>      | 1.957966878 | 0.96935636   | 0.00365363  | 0.026717553 | Up   |

|   |       |                 |             |              |             |             |      |
|---|-------|-----------------|-------------|--------------|-------------|-------------|------|
| A | chr2  | <i>PTCD3</i>    | 4.113161786 | 2.040247819  | 0.005451157 | 0.034961686 | Up   |
| A | chr2  | <i>ALS2CR8</i>  | 3.690028767 | 1.883632063  | 0.00201308  | 0.017814737 | Up   |
| A | chr7  | <i>ING3</i>     | 2.262091038 | 1.177656992  | 0.00026995  | 0.004339477 | Up   |
| A | chr5  | <i>COL4A3BP</i> | 1.704519545 | 0.769365142  | 0.004887704 | 0.032664306 | Up   |
| A | chr21 | <i>TTC3</i>     | 1.797413218 | 0.845922117  | 0.002309712 | 0.019516357 | Up   |
| A | chr12 | <i>KDM5A</i>    | 1.605978728 | 0.683452784  | 0.004639027 | 0.031538137 | Up   |
| A | chr19 | <i>ARHGEF1</i>  | 0.309217546 | -1.69330591  | 0.00061639  | 0.007899307 | Down |
| A | chr12 | <i>CCDC38</i>   | 0.050270328 | -4.314149079 | 0.003759793 | 0.027325491 | Down |
| A | chr15 | <i>CA12</i>     | 0.159129683 | -2.651725125 | 0.000137855 | 0.002705889 | Down |
| A | chr19 | <i>ISYNA1</i>   | 0.338551645 | -1.562552165 | 4.23E-05    | 0.001178553 | Down |
| A | chr4  | <i>PCDH7</i>    | 2.607554572 | 1.382697446  | 1.38E-05    | 0.000496046 | Up   |
| A | chr7  | <i>YWHAG</i>    | 0.474031245 | -1.076945939 | 1.22E-05    | 0.000454011 | Down |
| A | chr4  | <i>FAT1</i>     | 0.039498115 | -4.662072382 | 0.000259307 | 0.004204634 | Down |
| A | chr19 | <i>EPN1</i>     | 0.50716314  | -0.9794782   | 0.000198676 | 0.003476725 | Down |
| A | chr5  | <i>ANKRD32</i>  | 2.138828006 | 1.096820473  | 0.000238128 | 0.003974786 | Up   |
| A | chr7  | <i>JHDM1D</i>   | 1.657148485 | 0.728702877  | 0.006376648 | 0.039019943 | Up   |
| A | chr11 | <i>DDX10</i>    | 2.41012332  | 1.269106968  | 6.33E-05    | 0.001568753 | Up   |
| A | chr1  | <i>CCT3</i>     | 2.033491181 | 1.023958734  | 0.002585338 | 0.021104701 | Up   |
| A | chr6  | <i>DST</i>      | 1.7524332   | 0.809359452  | 0.00203962  | 0.017988617 | Up   |
| A | chr16 | <i>COX6A2</i>   | 0.01777796  | -5.81376639  | 3.77E-05    | 0.001083971 | Down |
| A | chr7  | <i>RBM28</i>    | 2.00957768  | 1.006892346  | 0.003443032 | 0.025755636 | Up   |
| A | chr12 | <i>CCDC41</i>   | 2.431067273 | 1.281589817  | 1.65E-05    | 0.000568246 | Up   |
| A | chr17 | <i>SAMD14</i>   | 0.182732426 | -2.452195434 | 0.000206413 | 0.003578095 | Down |
| A | chr12 | <i>COPS7A</i>   | 0.523649318 | -0.933327116 | 0.001509259 | 0.014617686 | Down |
| A | chrX  | <i>CCDC120</i>  | 0.190582214 | -2.391514611 | 0.006625542 | 0.040112802 | Down |
| A | chr17 | <i>PTRF</i>     | 0.26944449  | -1.891940012 | 0.000571647 | 0.007506746 | Down |
| A | chrX  | <i>TAF1</i>     | 1.697249897 | 0.763198998  | 0.00287562  | 0.022598117 | Up   |
| A | chr19 | <i>FIZ1</i>     | 0.370145059 | -1.433837323 | 0.005072027 | 0.033487695 | Down |
| A | chr13 | <i>HMGB1</i>    | 2.010797657 | 1.007767913  | 0.001480726 | 0.014413067 | Up   |
| A | chr1  | <i>FAM132A</i>  | 0.236308167 | -2.081258602 | 0.000295221 | 0.004648395 | Down |
| A | chr13 | <i>UBAC2</i>    | 0.500431467 | -0.998755587 | 0.001847005 | 0.016812385 | Down |
| A | chr3  | <i>XXYL1</i>    | 0.441615392 | -1.179137638 | 0.003512113 | 0.026064663 | Down |
| A | chr14 | <i>SYNJ2BP</i>  | Inf         | Inf          | 0.004012541 | 0.028542616 | Up   |
| A | chr1  | <i>ESPN</i>     | 0           | #NAME?       | 0.000763446 | 0.009134059 | Down |
| A | chr10 | <i>LHPP</i>     | Inf         | Inf          | 0.003647113 | 0.026717553 | Up   |
| A | chr17 | <i>DDX52</i>    | 2.962088202 | 1.5666146    | 1.54E-06    | 9.85E-05    | Up   |
| A | chr18 | <i>DSEL</i>     | 2.547817753 | 1.349262084  | 0.000542605 | 0.007241946 | Up   |
| A | chr1  | <i>PRPF38A</i>  | 3.89094082  | 1.960119038  | 3.22E-06    | 0.00017081  | Up   |
| A | chr10 | <i>SMC3</i>     | 2.02733393  | 1.01958374   | 4.34E-05    | 0.001188113 | Up   |
| A | chr19 | <i>EPOR</i>     | 0.198186565 | -2.335068928 | 0.00677058  | 0.040632818 | Down |
| A | chr4  | <i>NUP54</i>    | 2.257945959 | 1.175010957  | 0.000217213 | 0.003696578 | Up   |
| A | chr19 | <i>PSENFEN</i>  | 0.454377622 | -1.138036311 | 0.00017955  | 0.003250579 | Down |
| A | chr1  | <i>APH1A</i>    | 0.339810872 | -1.557196084 | 4.16E-10    | 1.51E-07    | Down |
| A | chrX  | <i>KLHL15</i>   | 1.982168856 | 0.987079867  | 0.00351706  | 0.026069384 | Up   |

|   |       |                  |             |              |             |             |      |
|---|-------|------------------|-------------|--------------|-------------|-------------|------|
| A | chr9  | <i>RAPGEF1</i>   | 0.432940162 | -1.207760454 | 1.95E-06    | 0.000117179 | Down |
| A | chr3  | <i>EIF4A2</i>    | 2.088651081 | 1.062571503  | 0.001298236 | 0.013146525 | Up   |
| A | chr12 | <i>PITPNM2</i>   | 0.498949939 | -1.003033021 | 0.005995947 | 0.037319286 | Down |
| A | chr17 | <i>SCN4A</i>     | 0.012205739 | -6.356296595 | 1.72E-06    | 0.000107136 | Down |
| A | chr7  | <i>DTX2</i>      | 0.222250852 | -2.169739144 | 0.000680356 | 0.008409747 | Down |
| A | chr10 | <i>MPP7</i>      | 2.854242832 | 1.513108081  | 0.000264707 | 0.004281352 | Up   |
| A | chr8  | <i>KHDRBS3</i>   | 5.381833406 | 2.428097733  | 3.23E-07    | 3.10E-05    | Up   |
| A | chr2  | <i>PABPC1P2</i>  | 0.124136933 | -3.009995686 | 2.37E-07    | 2.48E-05    | Down |
| A | chr2  | <i>FHL2</i>      | 0.176561887 | -2.501754143 | 0.004000073 | 0.028516084 | Down |
| A | chr12 | <i>KIAA1033</i>  | 2.365048395 | 1.241869705  | 3.16E-05    | 0.000936955 | Up   |
| A | chr6  | <i>UTRN</i>      | 1.727477038 | 0.788666534  | 0.001626933 | 0.015433399 | Up   |
| A | chr11 | <i>EED</i>       | 1.875012721 | 0.906900383  | 0.000657475 | 0.008196779 | Up   |
| A | chr12 | <i>SUDS3</i>     | 6.635683335 | 2.73024504   | 0.001582607 | 0.015133893 | Up   |
| A | chr2  | <i>AFTPH</i>     | 1.944290769 | 0.959243991  | 0.000241866 | 0.004032029 | Up   |
| A | chr2  | <i>RNPEPL1</i>   | 0.280806008 | -1.832354293 | 4.59E-07    | 4.03E-05    | Down |
| A | chr7  | <i>PLOD3</i>     | 0.406379635 | -1.299099987 | 5.09E-05    | 0.001317861 | Down |
| A | chr16 | <i>MTRNR2L4</i>  | 0.34280295  | -1.54454857  | 0.001084728 | 0.011605699 | Down |
| A | chr2  | <i>LRPPRC</i>    | 2.565619634 | 1.3593073    | 2.08E-05    | 0.000678182 | Up   |
| A | chr6  | <i>SKIV2L</i>    | 0.52397448  | -0.932431547 | 0.000484672 | 0.006659393 | Down |
| A | chr17 | <i>ITGB3</i>     | 0.41805396  | -1.258238925 | 0.001081108 | 0.011576459 | Down |
| A | chr16 | <i>ITGAL</i>     | 0.294554796 | -1.763392053 | 0.000142677 | 0.002783797 | Down |
| A | chr19 | <i>TOMM40</i>    | 0.45289387  | -1.142755082 | 0.001047402 | 0.011393118 | Down |
| A | chr5  | <i>EFNA5</i>     | 0           | #NAME?       | 1.22E-05    | 0.000454011 | Down |
| A | chr13 | <i>NUFIP1</i>    | 3.986186335 | 1.995009151  | 0.000379562 | 0.005582588 | Up   |
| A | chr6  | <i>CDC5L</i>     | 1.668731925 | 0.73875221   | 0.00362133  | 0.026600572 | Up   |
| A | chr16 | <i>IRF8</i>      | 0.349840448 | -1.515230994 | 7.20E-07    | 5.56E-05    | Down |
| A | chr5  | <i>ANKHD1</i>    | 3.684439016 | 1.881444975  | 0.001173701 | 0.012256335 | Up   |
| A | chr1  | <i>PTPRC</i>     | 1.620936596 | 0.69682766   | 0.005268531 | 0.034213999 | Up   |
| A | chr8  | <i>PTP4A3</i>    | 0.254113956 | -1.976452483 | 1.14E-10    | 4.50E-08    | Down |
| A | chr6  | <i>VTA1</i>      | 2.709773148 | 1.43817208   | 0.00020513  | 0.00356878  | Up   |
| A | chr1  | <i>PTPRF</i>     | 0.531789941 | -0.911071606 | 0.007990709 | 0.045867516 | Down |
| A | chr10 | <i>LOC283070</i> | 0.439291706 | -1.186748833 | 0.008362994 | 0.047261686 | Down |
| A | chr1  | <i>UBE2T</i>     | 3.502166205 | 1.808247552  | 0.003431431 | 0.025755636 | Up   |
| A | chr7  | <i>CDK6</i>      | 0.575158579 | -0.797968315 | 0.006730385 | 0.040532317 | Down |
| A | chr19 | <i>AP2A1</i>     | 0.437604497 | -1.192300531 | 2.53E-06    | 0.000141693 | Down |
| A | chr10 | <i>NCOA4</i>     | 1.956686492 | 0.96841262   | 0.000912116 | 0.010312821 | Up   |
| A | chr9  | <i>PAPPA</i>     | 0.033565781 | -4.896864976 | 0.008533195 | 0.047865833 | Down |
| A | chr3  | <i>LTF</i>       | 0.423554255 | -1.239381311 | 0.004488817 | 0.030807309 | Down |
| A | chrX  | <i>ZNF674</i>    | 4.918399955 | 2.298189057  | 1.44E-06    | 9.53E-05    | Up   |
| A | chr17 | <i>TOP2A</i>     | 1.89449696  | 0.921814825  | 9.80E-05    | 0.002124882 | Up   |
| A | chr12 | <i>GRIN2B</i>    | 0           | #NAME?       | 0.002388915 | 0.019937661 | Down |
| A | chr1  | <i>PTPRU</i>     | 0.308391533 | -1.697164938 | 0.008531595 | 0.047865833 | Down |
| A | chr22 | <i>RPS19BP1</i>  | Inf         | Inf          | 0.00817423  | 0.046674641 | Up   |
| A | chr3  | <i>MASP1</i>     | 0           | #NAME?       | 3.99E-06    | 0.000201163 | Down |

|   |       |                  |             |              |             |             |      |
|---|-------|------------------|-------------|--------------|-------------|-------------|------|
| A | chr19 | <i>MIER2</i>     | 8.476630636 | 3.083490924  | 0.002237784 | 0.019117077 | Up   |
| A | chr19 | <i>RFX1</i>      | 0.314717325 | -1.667871495 | 6.28E-05    | 0.00156274  | Down |
| A | chr7  | <i>MYO1G</i>     | 0.586425678 | -0.769979818 | 0.002582229 | 0.021104644 | Down |
| A | chr11 | <i>SLC25A22</i>  | 0.398186834 | -1.328482577 | 0.003539921 | 0.026185716 | Down |
| A | chr14 | <i>MIS18BP1</i>  | 3.278305469 | 1.712950289  | 0.000400235 | 0.005830661 | Up   |
| A | chr4  | <i>RBM47</i>     | 0.224585797 | -2.154661402 | 6.28E-07    | 4.97E-05    | Down |
| A | chr9  | <i>ZNF658</i>    | Inf         | Inf          | 5.04E-08    | 7.31E-06    | Up   |
| A | chr8  | <i>PCM1</i>      | 2.29214907  | 1.196700873  | 1.35E-06    | 9.18E-05    | Up   |
| A | chr2  | <i>NCKAP1</i>    | 2.601030705 | 1.37908343   | 0.003441437 | 0.025755636 | Up   |
| A | chr3  | <i>ABHD14B</i>   | 0.347067863 | -1.526710312 | 0.007648855 | 0.044373557 | Down |
| A | chr12 | <i>PEX5</i>      | 0.569365819 | -0.81257221  | 0.002233784 | 0.019117077 | Down |
| A | chrX  | <i>TFE3</i>      | 0.290734512 | -1.782225755 | 2.70E-06    | 0.000148141 | Down |
| A | chr3  | <i>MYNN</i>      | 1.941782241 | 0.95738142   | 0.002363819 | 0.019804166 | Up   |
| A | chr16 | <i>ATXN2L</i>    | 0.312527048 | -1.677947039 | 1.18E-05    | 0.000449035 | Down |
| A | chr6  | <i>BEND3</i>     | 0.373329282 | -1.421479423 | 0.005207195 | 0.033900009 | Down |
| A | chr19 | <i>SHKBP1</i>    | 0.43136041  | -1.213034321 | 0.003995068 | 0.028495971 | Down |
| A | chrX  | <i>THOC2</i>     | 1.990271415 | 0.992965186  | 4.32E-05    | 0.001184956 | Up   |
| A | chr1  | <i>UBE4B</i>     | 0.422373549 | -1.243408605 | 0.000925822 | 0.010404252 | Down |
| A | chr2  | <i>SMEK2</i>     | 1.617472286 | 0.693740993  | 0.0047044   | 0.031800377 | Up   |
| A | chr9  | <i>BNC2</i>      | 0.122455582 | -3.029669557 | 0.001949772 | 0.017372269 | Down |
| A | chr1  | <i>TMEM206</i>   | 0.513689744 | -0.961030826 | 0.007425507 | 0.043425243 | Down |
| A | chr7  | <i>ZC3HAV1</i>   | 0.520453724 | -0.942158202 | 0.00784426  | 0.045260031 | Down |
| A | chr17 | <i>GRN</i>       | 0.235414075 | -2.086727517 | 4.01E-08    | 6.23E-06    | Down |
| A | chr5  | <i>MGAT1</i>     | 0.412316178 | -1.278177025 | 3.10E-07    | 3.00E-05    | Down |
| A | chr10 | <i>DDX50</i>     | 1.777009857 | 0.829451684  | 0.001205369 | 0.012496967 | Up   |
| A | chr19 | <i>MYH14</i>     | 0.410190368 | -1.285634478 | 0.000226509 | 0.003835435 | Down |
| A | chr10 | <i>IDI1</i>      | 8.147428898 | 3.026344857  | 0.000201811 | 0.003526416 | Up   |
| A | chr9  | <i>RMRP</i>      | 0.54851402  | -0.866399599 | 0.001417744 | 0.013945603 | Down |
| A | chr15 | <i>VIMP</i>      | 2.923326062 | 1.547610754  | 0.006319701 | 0.038855889 | Up   |
| A | chr11 | <i>TBC1D10C</i>  | 0.360107612 | -1.473499999 | 3.47E-06    | 0.000181355 | Down |
| A | chr9  | <i>AGTPBP1</i>   | 2.450189584 | 1.292893382  | 9.46E-05    | 0.002076376 | Up   |
| A | chr4  | <i>SH3TC1</i>    | 0.176604295 | -2.501407662 | 0.0004086   | 0.005889651 | Down |
| A | chr6  | <i>ZNF184</i>    | 2.09758258  | 1.068727609  | 0.003026888 | 0.023489871 | Up   |
| A | chr8  | <i>RNF19A</i>    | 2.603749491 | 1.380590652  | 7.40E-06    | 0.000316029 | Up   |
| A | chr13 | <i>NAA16</i>     | 2.000140006 | 1.000100989  | 0.001013726 | 0.011119467 | Up   |
| A | chr12 | <i>CCDC91</i>    | Inf         | Inf          | 0.000454061 | 0.006379821 | Up   |
| A | chr3  | <i>ZNF148</i>    | 1.809938902 | 0.855940997  | 0.000414746 | 0.005956675 | Up   |
| A | chr19 | <i>CYP4F2</i>    | 0.269885245 | -1.889581988 | 0.00332275  | 0.025126699 | Down |
| A | chr11 | <i>MRPL11</i>    | 5.600847953 | 2.485645264  | 0.001460524 | 0.014248293 | Up   |
| A | chr12 | <i>STAT6</i>     | 0.548826537 | -0.865577853 | 0.001377492 | 0.01368372  | Down |
| A | chr12 | <i>SLC24A6</i>   | 0.231930494 | -2.108235576 | 0.001230854 | 0.012730851 | Down |
| A | chr13 | <i>HNRNPA1L2</i> | 4.309487254 | 2.107516227  | 0.000326692 | 0.004964273 | Up   |
| A | chr8  | <i>PREX2</i>     | 22.50687906 | 4.492294112  | 7.25E-08    | 1.00E-05    | Up   |
| A | chr3  | <i>GBE1</i>      | 2.000719229 | 1.000518721  | 0.001285172 | 0.013092836 | Up   |

|   |       |                   |             |              |             |             |      |
|---|-------|-------------------|-------------|--------------|-------------|-------------|------|
| A | chr17 | <i>LGALS3BP</i>   | 0.467119865 | -1.098135297 | 0.004849613 | 0.032495893 | Down |
| A | chr3  | <i>POC1A</i>      | 0.388220039 | -1.365053507 | 5.30E-05    | 0.001361727 | Down |
| A | chr14 | <i>ACTR10</i>     | 1.804961724 | 0.851968244  | 0.003966681 | 0.028324448 | Up   |
| A | chr17 | <i>PHF12</i>      | 0.581917143 | -0.781114346 | 0.004223046 | 0.029668151 | Down |
| A | chr1  | <i>ZNF281</i>     | 1.63756299  | 0.711550402  | 0.007042051 | 0.041876946 | Up   |
| A | chr11 | <i>CUL5</i>       | 2.139912951 | 1.097552111  | 7.43E-05    | 0.001775951 | Up   |
| A | chr2  | <i>MGAT5</i>      | 0.547702118 | -0.868536635 | 0.003540779 | 0.026185716 | Down |
| A | chr17 | <i>MYH10</i>      | 0.425499495 | -1.232770675 | 0.007432258 | 0.043445256 | Down |
| A | chr1  | <i>C1orf27</i>    | 2.742889875 | 1.4556967    | 0.001657855 | 0.015613262 | Up   |
| A | chr19 | <i>SYMPK</i>      | 0.569280228 | -0.812789101 | 0.00624534  | 0.038525717 | Down |
| A | chr10 | <i>ITGB1</i>      | 1.746916117 | 0.804810335  | 0.001794751 | 0.016405384 | Up   |
| A | chr15 | <i>BLM</i>        | 1.854325892 | 0.890894815  | 0.002059275 | 0.018137459 | Up   |
| A | chr11 | <i>TMEM134</i>    | 0.315969687 | -1.662141936 | 0.000149928 | 0.002856948 | Down |
| A | chr2  | <i>GCC2</i>       | 1.747534496 | 0.805320934  | 0.007729912 | 0.044693298 | Up   |
| A | chr2  | <i>SNORA80B</i>   | 0.150643853 | -2.730786294 | 0.008824617 | 0.049016052 | Down |
| A | chr9  | <i>SCARNA8</i>    | 0.114539456 | -3.126083439 | 0.004914788 | 0.032781158 | Down |
| A | chr11 | <i>OAF</i>        | 0.307829297 | -1.699797552 | 0.001894137 | 0.017051149 | Down |
| A | chr16 | <i>MYH11</i>      | 0.383814149 | -1.381520198 | 0.007608945 | 0.044220639 | Down |
| A | chr7  | <i>LRRN3</i>      | 2.648079545 | 1.404946459  | 0.000728974 | 0.008846515 | Up   |
| A | chr14 | <i>TINF2</i>      | Inf         | Inf          | 0.002065994 | 0.018159879 | Up   |
| A | chr6  | <i>TMEM63B</i>    | 0.444741866 | -1.168959876 | 0.000513166 | 0.0069485   | Down |
| A | chr19 | <i>GADD45GIP1</i> | 0.168921025 | -2.565579185 | 0.007488791 | 0.04371514  | Down |
| A | chr17 | <i>LPO</i>        | 0.201372408 | -2.312062074 | 2.33E-11    | 1.27E-08    | Down |
| A | chr15 | <i>BAHD1</i>      | 0.338889593 | -1.561112761 | 1.75E-06    | 0.000107841 | Down |
| A | chr7  | <i>HEATR2</i>     | 0.184324537 | -2.439679961 | 0.000407442 | 0.005883116 | Down |
| A | chr1  | <i>BTG2</i>       | 0.472877414 | -1.08046186  | 0.005099369 | 0.033549428 | Down |
| A | chr9  | <i>POLR1E</i>     | 4.761941503 | 2.251549898  | 0.002203327 | 0.018970991 | Up   |
| A | chr3  | <i>ZNF167</i>     | 4.121696861 | 2.043238403  | 0.001182174 | 0.012315177 | Up   |
| A | chr1  | <i>ATP13A2</i>    | 0.288599908 | -1.792857254 | 1.39E-11    | 8.22E-09    | Down |
| A | chrX  | <i>MTCP1</i>      | 3.043525923 | 1.605743654  | 0.004986801 | 0.033081947 | Up   |
| A | chr6  | <i>SLC35A1</i>    | 2.174191699 | 1.120479149  | 0.002460127 | 0.020375661 | Up   |
| A | chr9  | <i>SMC2</i>       | 1.969578456 | 0.977886887  | 0.0006355   | 0.00805358  | Up   |
| A | chrX  | <i>DDX26B</i>     | 1.777179694 | 0.829589562  | 0.000970309 | 0.010743614 | Up   |
| A | chr9  | <i>SMC5</i>       | 1.928827213 | 0.94772391   | 0.000353013 | 0.00530251  | Up   |
| A | chr14 | <i>SAMD4A</i>     | 0.138243403 | -2.85471746  | 0.001625015 | 0.015433399 | Down |
| A | chr7  | <i>DNAJB9</i>     | 1.997762867 | 0.998385347  | 0.002286656 | 0.019432113 | Up   |
| A | chr2  | <i>SPC25</i>      | 4.66955494  | 2.223285052  | 0.000137593 | 0.002704812 | Up   |
| A | chr5  | <i>FTMT</i>       | 0.063192297 | -3.984107484 | 0.002429501 | 0.020211776 | Down |
| A | chr17 | <i>BZRAP1</i>     | 0.450188303 | -1.151399524 | 0.00218817  | 0.018890332 | Down |
| A | chr2  | <i>SCARNA5</i>    | 0.221162786 | -2.176819445 | 0.00059171  | 0.007693406 | Down |
| A | chr6  | <i>NRM</i>        | 0.351646947 | -1.507800405 | 0.000214193 | 0.003673929 | Down |
| A | chr15 | <i>SLCO3A1</i>    | 0.454192406 | -1.138624511 | 0.000115109 | 0.002377408 | Down |
| A | chr1  | <i>RXRG</i>       | 0.179971371 | -2.474160669 | 0.000731546 | 0.008857951 | Down |
| A | chr3  | <i>CHDH</i>       | 0.237143453 | -2.076168056 | 2.27E-08    | 4.00E-06    | Down |

|   |       |                  |             |              |             |             |      |
|---|-------|------------------|-------------|--------------|-------------|-------------|------|
| A | chr5  | <i>RNF180</i>    | 5.658770131 | 2.500488534  | 0.007281559 | 0.042910244 | Up   |
| A | chr5  | <i>CANX</i>      | 1.845016023 | 0.883633346  | 0.000909431 | 0.010295574 | Up   |
| A | chr2  | <i>EEF1B2</i>    | 0.241483622 | -2.050002749 | 3.52E-10    | 1.31E-07    | Down |
| A | chr3  | <i>ATG3</i>      | 2.062086373 | 1.044104763  | 0.005436616 | 0.034923304 | Up   |
| A | chr6  | <i>SLC35B2</i>   | 0.542853184 | -0.881366024 | 0.002523245 | 0.0207405   | Down |
| A | chr1  | <i>IGSF3</i>     | 0.115202836 | -3.117751866 | 0.000105176 | 0.002225051 | Down |
| A | chr7  | <i>DNAJC2</i>    | 2.254295805 | 1.172676836  | 0.00164082  | 0.015520016 | Up   |
| A | chr1  | <i>IGSF8</i>     | 0.249101982 | -2.005191592 | 1.99E-06    | 0.000119099 | Down |
| A | chr19 | <i>CEBPG</i>     | 2.205158589 | 1.140882414  | 0.00899882  | 0.049771864 | Up   |
| A | chr10 | <i>NSMCE4A</i>   | 2.445551564 | 1.290159884  | 9.79E-05    | 0.002124882 | Up   |
| A | chr16 | <i>GPR56</i>     | 0.196920747 | -2.344312974 | 2.81E-05    | 0.00086002  | Down |
| A | chr9  | <i>ALDH1B1</i>   | 0.392090496 | -1.350741423 | 0.000133407 | 0.002642437 | Down |
| A | chr2  | <i>HIBCH</i>     | 3.021861001 | 1.595437301  | 0.003475699 | 0.025924745 | Up   |
| A | chr12 | <i>HVCN1</i>     | 0.22790508  | -2.13349501  | 0.000194204 | 0.003443062 | Down |
| A | chr12 | <i>SCN8A</i>     | 0.01413296  | -6.14479249  | 5.81E-10    | 1.90E-07    | Down |
| A | chr15 | <i>LEO1</i>      | 2.269632761 | 1.182458881  | 0.002237868 | 0.019117077 | Up   |
| A | chr2  | <i>PIKFYVE</i>   | 2.1110551   | 1.077964234  | 4.52E-05    | 0.001222399 | Up   |
| A | chr15 | <i>TMC3</i>      | 0.10695343  | -3.224945349 | 0.004798479 | 0.032321151 | Down |
| A | chr9  | <i>KLHL9</i>     | 1.766868662 | 0.821194803  | 0.000989138 | 0.010904751 | Up   |
| A | chr19 | <i>ZNF780B</i>   | 2.858648178 | 1.515333074  | 0.005043352 | 0.033365875 | Up   |
| A | chr5  | <i>LSP1P3</i>    | 14.8188397  | 3.889360586  | 0.001742292 | 0.016106334 | Up   |
| A | chr15 | <i>FURIN</i>     | 0.238314321 | -2.069062443 | 2.16E-10    | 8.29E-08    | Down |
| A | chr3  | <i>MLH1</i>      | 1.998437509 | 0.998872461  | 0.001023367 | 0.011194569 | Up   |
| A | chr22 | <i>MFNG</i>      | 0.442390417 | -1.17660796  | 0.00044356  | 0.006272793 | Down |
| A | chr16 | <i>CMIP</i>      | 0.274799736 | -1.863547478 | 0.004489045 | 0.030807309 | Down |
| A | chr2  | <i>DES</i>       | 0.020317669 | -5.621121312 | 0.000109373 | 0.002281868 | Down |
| A | chr2  | <i>SNRNP27</i>   | 2.722997008 | 1.445195397  | 0.001866456 | 0.016889386 | Up   |
| A | chr19 | <i>SBNO2</i>     | 0.4162669   | -1.26441925  | 0.004392334 | 0.030431604 | Down |
| A | chr19 | <i>RPS16</i>     | 0.446091054 | -1.16458988  | 0.00040409  | 0.005854154 | Down |
| A | chr2  | <i>ATG9A</i>     | 0.454717569 | -1.136957347 | 0.000505808 | 0.006877411 | Down |
| A | chr21 | <i>MORC3</i>     | 2.330085858 | 1.220383116  | 5.83E-06    | 0.000266057 | Up   |
| A | chr7  | <i>ACHE</i>      | 0.108471907 | -3.204606645 | 0.000927001 | 0.010404252 | Down |
| A | chr8  | <i>NUDCD1</i>    | 1.976093435 | 0.982651163  | 0.003012241 | 0.023417974 | Up   |
| A | chr14 | <i>ARHGAP5</i>   | 2.682290321 | 1.423465397  | 1.27E-05    | 0.000467253 | Up   |
| A | chr2  | <i>MYT1L</i>     | 0           | #NAME?       | 7.74E-05    | 0.00181448  | Down |
| A | chr9  | <i>CNTLN</i>     | 3.020827196 | 1.594943658  | 4.43E-07    | 3.93E-05    | Up   |
| A | chr10 | <i>YME1L1</i>    | 2.17025155  | 1.117862272  | 0.000482036 | 0.006637142 | Up   |
| A | chr5  | <i>ZFP62</i>     | 1.892740067 | 0.920476297  | 0.000827079 | 0.009691083 | Up   |
| A | chr5  | <i>UIMC1</i>     | 1.729956194 | 0.790735506  | 0.006683392 | 0.040330358 | Up   |
| A | chr14 | <i>G2E3</i>      | 2.264432379 | 1.179149458  | 0.003031364 | 0.02351063  | Up   |
| A | chr8  | <i>TMEM67</i>    | 2.493569806 | 1.318212591  | 0.007141758 | 0.042315648 | Up   |
| A | chr3  | <i>ZNF197</i>    | 2.317662156 | 1.212670281  | 0.007449439 | 0.043526197 | Up   |
| A | chr10 | <i>HNRNPA3P1</i> | 0.345324201 | -1.533976648 | 0.000518803 | 0.006995806 | Down |
| A | chr6  | <i>ZBTB12</i>    | 0.396201165 | -1.335694973 | 0.002509482 | 0.020666413 | Down |

|   |       |                     |             |              |             |             |      |
|---|-------|---------------------|-------------|--------------|-------------|-------------|------|
| A | chr1  | <i>EGLN1</i>        | 0.504596097 | -0.986799046 | 0.006377339 | 0.039019943 | Down |
| A | chr19 | <i>ZNF260</i>       | 2.394476299 | 1.259710156  | 4.98E-05    | 0.001295503 | Up   |
| A | chr2  | <i>KANSL1L</i>      | 1.901233422 | 0.926935668  | 0.000471583 | 0.006555461 | Up   |
| A | chr7  | <i>KLHL7</i>        | 1.850731602 | 0.888095687  | 0.003503224 | 0.026064663 | Up   |
| A | chr3  | <i>APPL1</i>        | 1.803611978 | 0.850888996  | 0.001701182 | 0.015861088 | Up   |
| A | chr19 | <i>GRIK5</i>        | 0.234247575 | -2.093893983 | 0.000288608 | 0.004555267 | Down |
| A | chr11 | <i>DSCAML1</i>      | 0           | #NAME?       | 5.74E-07    | 4.71E-05    | Down |
| A | chr17 | <i>CTDNEP1</i>      | 0.341354055 | -1.550659205 | 0.000394437 | 0.005759039 | Down |
| A | chr2  | <i>NOP58</i>        | 2.445174979 | 1.28993771   | 0.000108162 | 0.002266196 | Up   |
| A | chr3  | <i>ZNF654</i>       | 2.545820486 | 1.348130694  | 8.51E-06    | 0.000352339 | Up   |
| A | chr15 | <i>CTD SPL2</i>     | 1.964311189 | 0.974023501  | 9.12E-05    | 0.002028384 | Up   |
| A | chr12 | <i>TMEM194A</i>     | 2.331740939 | 1.221407511  | 0.005947715 | 0.037102233 | Up   |
| A | chrX  | <i>GABRA3</i>       | 0.048822954 | -4.356296595 | 0.00264867  | 0.021460642 | Down |
| A | chr2  | <i>PLA2R1</i>       | 0.056889473 | -4.135694484 | 0.003664352 | 0.026736082 | Down |
| A | chr19 | <i>ZNF728</i>       | Inf         | Inf          | 0.001087252 | 0.011623178 | Up   |
| A | chr5  | <i>KLHL3</i>        | 0.424006392 | -1.237842081 | 0.005290848 | 0.034290683 | Down |
| A | chr4  | <i>PDS5A</i>        | 1.874093074 | 0.906192604  | 0.000143158 | 0.002784927 | Up   |
| A | chr9  | <i>FAM122A</i>      | 0.449472143 | -1.153696392 | 0.001236381 | 0.012777894 | Down |
| A | chr1  | <i>IFFO2</i>        | 0.40457329  | -1.305527017 | 0.001317506 | 0.013290118 | Down |
| A | chr20 | <i>SULF2</i>        | 0.256992944 | -1.960199344 | 0.001276483 | 0.013037506 | Down |
| A | chr8  | <i>UBE2V2</i>       | 2.244465156 | 1.1663717    | 0.002937741 | 0.022979411 | Up   |
| A | chr9  | <i>VLDLR</i>        | 2.227012661 | 1.15510976   | 0.000603613 | 0.007793233 | Up   |
| A | chr5  | <i>PDLIM7</i>       | 0.357995167 | -1.481987982 | 0.00248708  | 0.020520768 | Down |
| A | chr6  | <i>ZBTB22</i>       | 0.444124205 | -1.170964893 | 0.001038271 | 0.011303217 | Down |
| A | chr22 | <i>MKL1</i>         | 0.313746237 | -1.67232994  | 6.75E-05    | 0.001653952 | Down |
| A | chr1  | <i>CDC42BPA</i>     | 1.821620718 | 0.865222605  | 0.001724757 | 0.015989528 | Up   |
| A | chr2  | <i>PNPT1</i>        | 2.003727409 | 1.002686255  | 0.002094107 | 0.018369879 | Up   |
| A | chr3  | <i>MBNL1</i>        | 1.632952394 | 0.707482733  | 0.004009603 | 0.02853727  | Up   |
| A | chr10 | <i>LOC100192204</i> | 0.036189301 | -4.78829294  | 5.02E-08    | 7.31E-06    | Down |
| A | chr5  | <i>HSPA9</i>        | 1.886124891 | 0.915425208  | 0.004256405 | 0.029772312 | Up   |
| A | chr5  | <i>SLCO4C1</i>      | 0.067131562 | -3.896864976 | 0.001064356 | 0.01147237  | Down |
| A | chr2  | <i>TEX261</i>       | 0.518995269 | -0.946206707 | 0.001908775 | 0.017135655 | Down |
| A | chr1  | <i>FAM189B</i>      | 0.195844821 | -2.35221712  | 4.13E-06    | 0.000204912 | Down |
| A | chr2  | <i>MFSD2B</i>       | 0.340256034 | -1.555307348 | 0.000198004 | 0.003476725 | Down |
| A | chr1  | <i>C1orf85</i>      | 0.35333395  | -1.500895719 | 0.000847324 | 0.009854475 | Down |
| A | chr9  | <i>PCSK5</i>        | 0.074681805 | -3.743099385 | 0.00513268  | 0.033649857 | Down |
| A | chr1  | <i>AGRN</i>         | 0.298924172 | -1.74214853  | 0.006409181 | 0.039154185 | Down |
| A | chr6  | <i>SRF</i>          | 0.532911214 | -0.908032902 | 0.000797304 | 0.009435365 | Down |
| A | chr4  | <i>CENPE</i>        | 2.165436952 | 1.114658168  | 0.00052124  | 0.007021404 | Up   |
| A | chr20 | <i>SLX4IP</i>       | 5.861520279 | 2.551274899  | 0.000308844 | 0.004765173 | Up   |
| A | chr17 | <i>CBX4</i>         | 0.5357606   | -0.900339606 | 0.002178873 | 0.018847466 | Down |
| A | chr1  | <i>AHCTF1</i>       | 1.910544098 | 0.933983557  | 0.008173212 | 0.046674641 | Up   |
| A | chr6  | <i>C6orf1</i>       | 0.409663486 | -1.287488787 | 0.006122177 | 0.03799713  | Down |
| A | chr12 | <i>NACA</i>         | 2.61448602  | 1.386527356  | 9.24E-06    | 0.000369021 | Up   |

|   |       |         |             |              |             |             |      |
|---|-------|---------|-------------|--------------|-------------|-------------|------|
| A | chr20 | RASSF2  | 0.553361931 | -0.853704699 | 0.003758249 | 0.027325491 | Down |
| A | chr16 | ZC3H7A  | 1.682562355 | 0.750659971  | 0.004839008 | 0.032441487 | Up   |
| A | chr12 | CHPT1   | 3.117136402 | 1.640221287  | 0.000276847 | 0.004428535 | Up   |
| A | chr2  | WDR12   | 1.859707725 | 0.895075903  | 0.001127505 | 0.011926514 | Up   |
| A | chr16 | GPR97   | 0.230053299 | -2.11995995  | 4.18E-07    | 3.74E-05    | Down |
| A | chr22 | TFIP11  | 0.43178332  | -1.211620583 | 0.001023441 | 0.011194569 | Down |
| A | chr8  | EPHX2   | 0.050270328 | -4.314149079 | 0.002966223 | 0.023142921 | Down |
| A | chr3  | TRA2B   | 1.81375131  | 0.858976656  | 0.001210172 | 0.012536807 | Up   |
| A | chr11 | CCDC88B | 0.252559179 | -1.985306618 | 6.28E-06    | 0.000274136 | Down |
| A | chr5  | ERAP1   | 1.952059446 | 0.964996988  | 0.000140472 | 0.002753128 | Up   |
| A | chr14 | NOVA1   | 0.101988031 | -3.293528248 | 0.003224711 | 0.024599168 | Down |
| A | chr14 | PPP1R36 | 0.023703947 | -5.39872889  | 0.000823105 | 0.009670558 | Down |
| A | chr5  | CAST    | 3.168541935 | 1.66381911   | 0.000311899 | 0.00480097  | Up   |
| A | chr2  | NBEAL1  | 2.056623939 | 1.040278016  | 0.000332364 | 0.00503518  | Up   |
| A | chr6  | RHAG    | 0.210962819 | -2.244939343 | 0.008692264 | 0.048548332 | Down |
| A | chr17 | SCO1    | 6.193091177 | 2.630659686  | 0.000542333 | 0.007241946 | Up   |
| A | chr15 | RPLP1   | 0.286759362 | -1.802087506 | 1.67E-07    | 1.88E-05    | Down |
| A | chr11 | SLC35C1 | 0.294307465 | -1.764603959 | 0.002616538 | 0.021298259 | Down |
| A | chr1  | CSDE1   | 1.961234731 | 0.971762215  | 0.000243115 | 0.004037623 | Up   |
| A | chr6  | TDP2    | 3.003051696 | 1.58642931   | 2.66E-06    | 0.000147071 | Up   |
| A | chr11 | RPS13   | 1.713550404 | 0.776988629  | 0.004873465 | 0.0325888   | Up   |
| A | chr7  | GNA12   | 0.522477958 | -0.93655792  | 0.003101284 | 0.023896732 | Down |
| A | chr1  | CENPF   | 2.341290075 | 1.227303689  | 0.000249234 | 0.004097293 | Up   |
| A | chr1  | TIPRL   | 1.967931047 | 0.976679672  | 0.002300224 | 0.01948399  | Up   |
| A | chr19 | ZNF296  | 0.266064178 | -1.910153811 | 0.00431829  | 0.030030173 | Down |
| A | chr14 | SNW1    | 2.366362622 | 1.242671169  | 0.000143598 | 0.002785127 | Up   |
| A | chr9  | PPP6C   | 1.752300765 | 0.80925042   | 0.001987502 | 0.017660222 | Up   |
| A | chr12 | CCNT1   | 1.739974461 | 0.799066131  | 0.005502723 | 0.035192081 | Up   |
| A | chr16 | SLC5A11 | 0.154031224 | -2.698705265 | 0.003078281 | 0.023789702 | Down |
| A | chrX  | SLC38A5 | 0.341577988 | -1.549713086 | 0.005904505 | 0.036947031 | Down |
| A | chr9  | FAM125B | 0.3240236   | -1.625829202 | 2.52E-06    | 0.000141693 | Down |
| A | chr8  | CNOT7   | 1.771387012 | 0.824879446  | 0.005622726 | 0.035759366 | Up   |
| A | chr10 | BAG3    | 0.323649373 | -1.627496384 | 0.003786647 | 0.027474764 | Down |
| A | chr22 | SUN2    | 0.347270949 | -1.525866367 | 7.89E-10    | 2.45E-07    | Down |
| A | chrX  | CD99L2  | Inf         | Inf          | 0.000975334 | 0.01077988  | Up   |
| A | chr16 | ATP6VOC | 0.250040952 | -1.999763692 | 8.36E-10    | 2.54E-07    | Down |
| A | chr19 | MAP4K1  | 0.461933321 | -1.114243479 | 0.000298267 | 0.004673809 | Down |
| A | chr3  | PHLDB2  | 4.019009378 | 2.006839944  | 0.00126368  | 0.012962241 | Up   |
| A | chr1  | FAF1    | 2.00582297  | 1.004194282  | 8.81E-05    | 0.001982922 | Up   |
| A | chr19 | DEDD2   | 0.294857942 | -1.761908043 | 3.79E-05    | 0.001087163 | Down |
| A | chr11 | PUS3    | 1.964323561 | 0.974032588  | 0.00200812  | 0.017807059 | Up   |
| A | chr12 | RSRC2   | 2.259289491 | 1.175869141  | 0.00014245  | 0.002783797 | Up   |
| A | chr12 | EEA1    | 2.132721312 | 1.092695458  | 0.000307607 | 0.004761727 | Up   |
| A | chr1  | DENND4B | 0.385322541 | -1.375861511 | 1.27E-05    | 0.000467253 | Down |

|   |       |                 |             |              |             |             |      |
|---|-------|-----------------|-------------|--------------|-------------|-------------|------|
| A | chr1  | <i>DNAJB4</i>   | 2.156578266 | 1.108744075  | 0.000704695 | 0.008612717 | Up   |
| A | chr3  | <i>CRBN</i>     | 2.374230936 | 1.24746027   | 0.00115204  | 0.012088085 | Up   |
| A | chr19 | <i>NR1H2</i>    | 0.550521479 | -0.861129243 | 0.007157992 | 0.042354157 | Down |
| A | chr6  | <i>SLC16A10</i> | 0.382128056 | -1.387871912 | 0.000118195 | 0.002414403 | Down |
| A | chr2  | <i>PIGF</i>     | 17.09441861 | 4.095453451  | 0.000515009 | 0.006959015 | Up   |
| A | chr9  | <i>LHX2</i>     | 0.055297361 | -4.176645555 | 0.008487752 | 0.047709831 | Down |
| A | chr12 | <i>ST8SIA1</i>  | 0.117219697 | -3.092713085 | 2.81E-07    | 2.79E-05    | Down |
| A | chr10 | <i>TACC2</i>    | 0.469231514 | -1.091628186 | 0.00701313  | 0.041762036 | Down |
| A | chr3  | <i>MUC13</i>    | Inf         | Inf          | 0.001593884 | 0.015219434 | Up   |
| A | chr10 | <i>EIF4EBP2</i> | 0.287064248 | -1.800554429 | 0.002009651 | 0.017808539 | Down |
| A | chr2  | <i>ZNF513</i>   | 0.344880874 | -1.53582997  | 2.51E-05    | 0.000781569 | Down |
| A | chr17 | <i>MYO18A</i>   | 0.476618164 | -1.069094161 | 0.0023515   | 0.019751696 | Down |
| A | chr14 | <i>ALDH6A1</i>  | 2.828044729 | 1.499804938  | 0.000876034 | 0.010057054 | Up   |
| A | chr11 | <i>RPLP2</i>    | 0.494656286 | -1.015501683 | 0.006211575 | 0.038353683 | Down |
| A | chr11 | <i>GRIK4</i>    | 0.093489028 | -3.41905913  | 0.004181995 | 0.029506804 | Down |
| A | chr14 | <i>PRPF39</i>   | 2.025173735 | 1.018045679  | 7.83E-05    | 0.001829714 | Up   |
| A | chr17 | <i>WBP2</i>     | 0.51964658  | -0.944397339 | 0.004186592 | 0.029516419 | Down |
| A | chr18 | <i>LDLRAD4</i>  | 0.558334452 | -0.840798515 | 0.00787359  | 0.045354798 | Down |
| A | chr1  | <i>B3GALT2</i>  | 2.069726887 | 1.049440408  | 0.006604399 | 0.040021924 | Up   |
| A | chr11 | <i>PNPLA2</i>   | 0.312592295 | -1.677645875 | 2.00E-06    | 0.000119099 | Down |
| A | chr12 | <i>PCBP2</i>    | 0.525718513 | -0.927637556 | 0.000609298 | 0.007835634 | Down |
| A | chr15 | <i>SCAMP2</i>   | 0.409284034 | -1.288825707 | 1.61E-05    | 0.00055911  | Down |
| A | chr14 | <i>TDP1</i>     | 0.387897423 | -1.366252903 | 9.29E-05    | 0.002054647 | Down |
| A | chr9  | <i>CNTRL</i>    | 1.695445663 | 0.761664548  | 0.002795713 | 0.022183857 | Up   |
| A | chr13 | <i>DIS3</i>     | 2.284562852 | 1.191918134  | 3.38E-05    | 0.000988255 | Up   |
| A | chr20 | <i>PPP1R16B</i> | 0.365950378 | -1.45028006  | 0.002747031 | 0.021930886 | Down |
| A | chr12 | <i>SUOX</i>     | 0.360865748 | -1.470465882 | 0.00119045  | 0.012381625 | Down |
| A | chr7  | <i>GIGYF1</i>   | 0.289682974 | -1.787453203 | 0.001143808 | 0.012040423 | Down |
| A | chr1  | <i>UBAP2L</i>   | 0.664934831 | -0.588715142 | 0.00886101  | 0.049138333 | Down |
| A | chr5  | <i>TTC1</i>     | 2.795647837 | 1.483182638  | 0.001671495 | 0.015692788 | Up   |
| A | chr18 | <i>TTC39C</i>   | 3.837003276 | 1.939979997  | 0.003326357 | 0.025126699 | Up   |
| A | chr2  | <i>HAT1</i>     | 2.037693784 | 1.026937265  | 0.000504919 | 0.00687248  | Up   |
| A | chr5  | <i>FER</i>      | 3.204275286 | 1.679998098  | 0.000165259 | 0.003068454 | Up   |
| A | chr1  | <i>IL6R</i>     | 0.110594722 | -3.176645555 | 0.000121622 | 0.00245747  | Down |
| A | chr21 | <i>BRWD1</i>    | 1.717971598 | 0.780706186  | 0.004007663 | 0.02853727  | Up   |
| A | chr10 | <i>SAR1A</i>    | 1.826156011 | 0.868810022  | 0.002123263 | 0.018538432 | Up   |
| A | chr2  | <i>CDCA7</i>    | 1.732643878 | 0.792975158  | 0.00819858  | 0.046770586 | Up   |
| A | chr1  | <i>SH3BGRL3</i> | 0.18997587  | -2.39611191  | 5.34E-21    | 1.74E-17    | Down |
| A | chr19 | <i>ZNF787</i>   | 0.203302356 | -2.298301161 | 2.93E-06    | 0.000158868 | Down |
| A | chr1  | <i>GNB1</i>     | 0.482158024 | -1.052422036 | 2.11E-05    | 0.000684769 | Down |
| A | chr20 | <i>PIGT</i>     | 0.27867086  | -1.843365946 | 3.33E-07    | 3.17E-05    | Down |
| A | chr20 | <i>HM13</i>     | 0.624083647 | -0.680188685 | 0.004476596 | 0.030799497 | Down |
| A | chr8  | <i>FAM91A1</i>  | 2.05224972  | 1.03720629   | 0.000379785 | 0.005582588 | Up   |
| A | chr6  | <i>GNL1</i>     | 0.551962747 | -0.857357195 | 0.006595567 | 0.040021924 | Down |

|   |       |                     |             |              |             |             |      |
|---|-------|---------------------|-------------|--------------|-------------|-------------|------|
| A | chr14 | <i>DNAAF2</i>       | 3.174025875 | 1.666313889  | 0.004951387 | 0.032932992 | Up   |
| A | chr2  | <i>HNRPLL</i>       | 1.667359837 | 0.737565489  | 0.00588879  | 0.03686637  | Up   |
| A | chr21 | <i>SAMSN1</i>       | 2.200548704 | 1.137863303  | 0.002744082 | 0.021930886 | Up   |
| A | chr1  | <i>C1orf112</i>     | 2.728458449 | 1.448086073  | 0.000926655 | 0.010404252 | Up   |
| A | chr1  | <i>C1orf114</i>     | Inf         | Inf          | 0.000636743 | 0.008061504 | Up   |
| A | chr6  | <i>POLH</i>         | 2.159766429 | 1.110875298  | 0.002157876 | 0.018740352 | Up   |
| A | chr4  | <i>PLK4</i>         | 2.2369492   | 1.161532494  | 0.000102943 | 0.002202807 | Up   |
| A | chr12 | <i>RASAL1</i>       | 0.150758756 | -2.729686299 | 0.000301224 | 0.004703209 | Down |
| A | chr12 | <i>CDK17</i>        | 1.672982987 | 0.742422774  | 0.00272068  | 0.021881108 | Up   |
| A | chrX  | <i>TTC3P1</i>       | Inf         | Inf          | 0.000776085 | 0.009240699 | Up   |
| A | chr3  | <i>SACM1L</i>       | 1.849247369 | 0.886938223  | 0.002775908 | 0.022093862 | Up   |
| A | chr7  | <i>PAPOLB</i>       | 1.938344908 | 0.954825306  | 0.002233565 | 0.019117077 | Up   |
| A | chr11 | <i>PGAP2</i>        | 0.468026562 | -1.095337685 | 0.000234023 | 0.003934648 | Down |
| A | chr5  | <i>LYSMD3</i>       | Inf         | Inf          | 2.59E-07    | 2.64E-05    | Up   |
| A | chr12 | <i>GCN1L1</i>       | 0.407749418 | -1.294245276 | 0.000222565 | 0.003777815 | Down |
| A | chr2  | <i>ITSN2</i>        | 1.656585392 | 0.728212572  | 0.003149826 | 0.024156689 | Up   |
| A | chr21 | <i>UBASH3A</i>      | 0.492771085 | -1.021010492 | 0.004865848 | 0.032554546 | Down |
| A | chr19 | <i>ZNF791</i>       | 2.109954885 | 1.077212151  | 0.003530339 | 0.026138122 | Up   |
| A | chr6  | <i>TOMM6</i>        | 0.447097359 | -1.161339071 | 0.005428686 | 0.034905073 | Down |
| A | chr19 | <i>SNORD33</i>      | 0.085685214 | -3.544809921 | 7.70E-06    | 0.000326336 | Down |
| A | chr7  | <i>WDR91</i>        | 0.505211952 | -0.985039324 | 0.000825789 | 0.009684656 | Down |
| A | chrX  | <i>PLP2</i>         | 0.478566642 | -1.063208255 | 0.00356771  | 0.02631035  | Down |
| A | chr2  | <i>STEAP3</i>       | 0.254402122 | -1.974817388 | 0.000348764 | 0.00525497  | Down |
| A | chr1  | <i>FUBP1</i>        | 2.386134982 | 1.254675658  | 9.85E-06    | 0.000390734 | Up   |
| A | chr6  | <i>MICAL1</i>       | 0.431817915 | -1.211504997 | 0.000117743 | 0.002412724 | Down |
| A | chr12 | <i>NCOR2</i>        | 0.222353701 | -2.169071679 | 0.000453926 | 0.006379821 | Down |
| A | chr7  | <i>SSBP1</i>        | 2.8957848   | 1.533954393  | 0.000297871 | 0.004673215 | Up   |
| A | chrX  | <i>MTMR1</i>        | 2.447833392 | 1.291505366  | 1.78E-05    | 0.000604209 | Up   |
| A | chr19 | <i>EML2</i>         | 0.550941844 | -0.860028054 | 0.005126171 | 0.033649857 | Down |
| A | chr14 | <i>GOLGA5</i>       | 2.14511948  | 1.101058006  | 0.001760918 | 0.01622107  | Up   |
| A | chr8  | <i>RAB2A</i>        | 1.733714394 | 0.793866254  | 0.001964893 | 0.017483131 | Up   |
| A | chr4  | <i>APIAR</i>        | 2.403959655 | 1.265412684  | 0.003511278 | 0.026064663 | Up   |
| A | chr20 | <i>FER1L4</i>       | 0           | #NAME?       | 0.004168044 | 0.029456133 | Down |
| A | chr17 | <i>KIAA0753</i>     | 2.70054873  | 1.433252581  | 0.005694096 | 0.036062607 | Up   |
| A | chr16 | <i>MON1B</i>        | 0.401850815 | -1.315268086 | 0.008991231 | 0.049750973 | Down |
| A | chr5  | <i>LMBRD2</i>       | 2.033118487 | 1.023694296  | 0.006769774 | 0.040632818 | Up   |
| A | chr15 | <i>PSMA4</i>        | 2.949434495 | 1.560438368  | 0.002206635 | 0.018974443 | Up   |
| A | chr12 | <i>LOC100507250</i> | 2.625366901 | 1.392519057  | 0.001779171 | 0.016289359 | Up   |
| A | chr6  | <i>DEF6</i>         | 0.582972788 | -0.778499553 | 0.003663319 | 0.026736082 | Down |
| A | chr17 | <i>CLUH</i>         | 0.616721784 | -0.697308287 | 0.004694719 | 0.031767845 | Down |
| A | chr2  | <i>ST3GAL5</i>      | 0.3425144   | -1.54576345  | 0.00695256  | 0.041496004 | Down |
| A | chr20 | <i>CSE1L</i>        | 1.666902506 | 0.737169726  | 0.002947269 | 0.023022565 | Up   |
| A | chr3  | <i>IL1RAP</i>       | 5.331259474 | 2.4144764    | 9.99E-06    | 0.000393908 | Up   |
| A | chr2  | <i>WDR75</i>        | 1.886431331 | 0.915659585  | 0.001337462 | 0.01343949  | Up   |

|   |       |                 |             |              |             |             |      |
|---|-------|-----------------|-------------|--------------|-------------|-------------|------|
| A | chr11 | <i>INTS4</i>    | 2.677820604 | 1.421059313  | 6.26E-06    | 0.000274136 | Up   |
| A | chr11 | <i>INTS5</i>    | 0.375112803 | -1.414603592 | 8.79E-08    | 1.15E-05    | Down |
| A | chr5  | <i>SKIV2L2</i>  | 1.844958132 | 0.883588078  | 0.000768482 | 0.009177492 | Up   |
| A | chr16 | <i>ZNF768</i>   | 0.485500765 | -1.042454527 | 0.008678627 | 0.048535612 | Down |
| A | chr14 | <i>PSMA3</i>    | 2.135623751 | 1.094657499  | 0.000169445 | 0.003110782 | Up   |
| A | chr14 | <i>PSMA6</i>    | 1.870795752 | 0.903652058  | 0.008440637 | 0.047571517 | Up   |
| A | chr1  | <i>RPAP2</i>    | 3.918312035 | 1.970232291  | 0.003120497 | 0.024002267 | Up   |
| A | chr7  | <i>MACC1</i>    | 0.187692606 | -2.413556281 | 0.001216322 | 0.012590526 | Down |
| A | chr3  | <i>RFC4</i>     | 2.265762487 | 1.179996636  | 0.000226547 | 0.003835435 | Up   |
| A | chr18 | <i>SLC14A1</i>  | 0.490327796 | -1.028181547 | 0.004216908 | 0.029657303 | Down |
| A | chr13 | <i>AKAP11</i>   | 2.064673304 | 1.04591352   | 0.000180608 | 0.003260679 | Up   |
| A | chr13 | <i>DOCK9</i>    | 1.779850819 | 0.831756324  | 0.005321477 | 0.034454977 | Up   |
| A | chr1  | <i>ZRANB2</i>   | 2.970592747 | 1.570750833  | 3.29E-05    | 0.00096602  | Up   |
| A | chr9  | <i>SLC25A51</i> | 2.05266049  | 1.037495025  | 0.008065565 | 0.046195622 | Up   |
| A | chr19 | <i>CD37</i>     | 0.556994348 | -0.844265407 | 0.006961393 | 0.041529736 | Down |
| A | chr2  | <i>KLF7</i>     | 0.562559399 | -0.829922661 | 0.008096058 | 0.046329614 | Down |
| A | chr1  | <i>CCDC18</i>   | 4.925984086 | 2.300411967  | 7.54E-08    | 1.02E-05    | Up   |
| A | chr4  | <i>SH3D19</i>   | 4.866381049 | 2.282849291  | 0.008495295 | 0.047714751 | Up   |
| A | chr10 | <i>UPF2</i>     | 1.618975116 | 0.695080811  | 0.006586964 | 0.040009137 | Up   |
| A | chr7  | <i>CAPZA2</i>   | 2.154487731 | 1.107344883  | 0.002828549 | 0.022357624 | Up   |
| A | chr4  | <i>SNORA26</i>  | 0.190084679 | -2.395285842 | 0.000358473 | 0.005366296 | Down |
| A | chr8  | <i>KIF13B</i>   | 1.770732243 | 0.824346075  | 0.004249275 | 0.029772312 | Up   |
| A | chr15 | <i>COPS2</i>    | 1.889666452 | 0.918131605  | 0.005880101 | 0.036853862 | Up   |
| A | chr19 | <i>DCAF15</i>   | 0.549254531 | -0.86445323  | 0.006278638 | 0.038694552 | Down |
| A | chr11 | <i>SIDT2</i>    | 0.448639316 | -1.15637204  | 5.94E-06    | 0.000266834 | Down |
| A | chr8  | <i>XKR6</i>     | 0.023703947 | -5.39872889  | 1.67E-09    | 4.49E-07    | Down |
| A | chr7  | <i>TTYH3</i>    | 0.199812803 | -2.323279065 | 4.68E-05    | 0.001250238 | Down |
| A | chr2  | <i>DOCK10</i>   | 1.601166276 | 0.679123135  | 0.004214888 | 0.029657303 | Up   |
| A | chr17 | <i>PSMD3</i>    | 0.478337869 | -1.063898084 | 7.02E-05    | 0.001704195 | Down |
| A | chr9  | <i>ANP32B</i>   | 0.403249355 | -1.310255868 | 0.000463564 | 0.006464643 | Down |
| A | chr2  | <i>ZC3H8</i>    | 3.556782414 | 1.83057272   | 0.004793851 | 0.032321151 | Up   |
| A | chr15 | <i>FAM98B</i>   | 0.354666612 | -1.495464572 | 0.001201806 | 0.012479849 | Down |
| A | chr4  | <i>HADH</i>     | 0.400210745 | -1.321168193 | 0.000155451 | 0.002927713 | Down |
| A | chr1  | <i>PNRC2</i>    | 2.984465389 | 1.577472523  | 0.000513948 | 0.006951875 | Up   |
| A | chr6  | <i>DOPEY1</i>   | 1.638403314 | 0.712290538  | 0.005771294 | 0.036427807 | Up   |
| A | chr19 | <i>SF3A2</i>    | 0.164847889 | -2.600792681 | 1.69E-09    | 4.49E-07    | Down |
| A | chr2  | <i>AUP1</i>     | 0.509466054 | -0.972942072 | 0.000145288 | 0.002813707 | Down |
| A | chr22 | <i>PATZ1</i>    | 0.48807938  | -1.034812293 | 6.39E-05    | 0.001578534 | Down |
| A | chr19 | <i>TSEN34</i>   | 0.217808244 | -2.198869533 | 0.000440857 | 0.006241326 | Down |
| A | chr14 | <i>SLC7A8</i>   | 0.132800303 | -2.912669655 | 6.13E-11    | 2.76E-08    | Down |
| A | chr6  | <i>PEX6</i>     | 0.395187991 | -1.339388987 | 2.18E-05    | 0.000701984 | Down |
| A | chr1  | <i>RCC2</i>     | 0.414789925 | -1.269547243 | 5.90E-07    | 4.81E-05    | Down |
| A | chr2  | <i>PSD4</i>     | 0.518781414 | -0.946801301 | 0.001692483 | 0.015802559 | Down |
| A | chr6  | <i>PTK7</i>     | 0.506142569 | -0.982384277 | 0.005147038 | 0.033685842 | Down |

|   |       |                  |             |              |             |             |      |
|---|-------|------------------|-------------|--------------|-------------|-------------|------|
| A | chr12 | <i>ESYT1</i>     | 0.437096941 | -1.193974812 | 0.000308072 | 0.004761727 | Down |
| A | chr3  | <i>UBA3</i>      | 1.77047807  | 0.824138974  | 0.004303235 | 0.029973536 | Up   |
| A | chr10 | <i>ZNF248</i>    | 2.012019277 | 1.008644127  | 0.003304431 | 0.025018993 | Up   |
| A | chr11 | <i>CHORDC1</i>   | 2.791166281 | 1.480868074  | 0.005056806 | 0.033404093 | Up   |
| A | chr7  | <i>ARF5</i>      | 0.486000113 | -1.040971445 | 8.85E-05    | 0.001987176 | Down |
| A | chr1  | <i>COG2</i>      | 7.367674445 | 2.881209315  | 3.10E-06    | 0.000165144 | Up   |
| A | chrX  | <i>MPC1L</i>     | 0.113212696 | -3.142892335 | 0.007622024 | 0.044257244 | Down |
| A | chr20 | <i>EIF2S2</i>    | 2.544679855 | 1.347484163  | 0.002140861 | 0.01862977  | Up   |
| A | chr6  | <i>WTAP</i>      | 1.620621692 | 0.696547356  | 0.005431104 | 0.034905073 | Up   |
| A | chr2  | <i>EHBP1</i>     | 2.207674944 | 1.142527766  | 0.002660671 | 0.021544504 | Up   |
| A | chr1  | <i>FCER1G</i>    | 0.306853759 | -1.704376837 | 0.000405079 | 0.005861963 | Down |
| A | chr1  | <i>ZDHH18</i>    | 0.42941948  | -1.219540455 | 0.000885008 | 0.010130511 | Down |
| A | chr1  | <i>FAM102B</i>   | 0.412219675 | -1.27851473  | 2.11E-05    | 0.000684769 | Down |
| A | chr2  | <i>ROCK2</i>     | 2.274286161 | 1.185413792  | 2.01E-06    | 0.000119099 | Up   |
| A | chr10 | <i>EBF3</i>      | 0.032527859 | -4.942180302 | 0.000143431 | 0.002785127 | Down |
| A | chr1  | <i>ALDH4A1</i>   | 0.368029845 | -1.44210533  | 0.002834231 | 0.022380648 | Down |
| A | chr5  | <i>PAM</i>       | 1.853721217 | 0.890424292  | 0.002597293 | 0.021162592 | Up   |
| A | chr19 | <i>PLD3</i>      | 0.412772243 | -1.276582136 | 0.000414818 | 0.005956675 | Down |
| A | chr12 | <i>HSP90B1</i>   | 2.383571486 | 1.253124894  | 0.001323332 | 0.013328278 | Up   |
| A | chr6  | <i>RAB44</i>     | 0.410351902 | -1.285066455 | 0.006662623 | 0.040262599 | Down |
| A | chr19 | <i>ABCA7</i>     | 0.533277318 | -0.907042129 | 0.004398441 | 0.03044652  | Down |
| A | chr15 | <i>ZNF609</i>    | 0.44020255  | -1.183760591 | 0.007850204 | 0.045260031 | Down |
| A | chr12 | <i>ASUN</i>      | 1.933530336 | 0.9512374    | 0.000661931 | 0.008244454 | Up   |
| A | chr11 | <i>ACAD8</i>     | 2.825012136 | 1.498257065  | 0.000900995 | 0.010208926 | Up   |
| A | chr17 | <i>VAMP2</i>     | 0.353657999 | -1.499573201 | 0.000629089 | 0.008003409 | Down |
| A | chr9  | <i>CDK9</i>      | 0.355307871 | -1.492858447 | 7.02E-05    | 0.001704195 | Down |
| A | chrX  | <i>BCORL1</i>    | 0.304302641 | -1.71642124  | 0.000709197 | 0.008643468 | Down |
| A | chr7  | <i>ACTB</i>      | 0.546077151 | -0.872823301 | 9.84E-05    | 0.002129667 | Down |
| A | chr18 | <i>NOL4</i>      | 0.031605263 | -4.983691391 | 0.002620168 | 0.021309067 | Down |
| A | chr7  | <i>ELFN1</i>     | 0.026852625 | -5.218793071 | 0.003014186 | 0.02341915  | Down |
| A | chr19 | <i>MAP1S</i>     | 0.178310129 | -2.487539436 | 0.006856051 | 0.041032571 | Down |
| A | chr2  | <i>SGOL2</i>     | 5.408385134 | 2.43519789   | 0.007340651 | 0.043081663 | Up   |
| A | chr20 | <i>MMP9</i>      | 0.16194735  | -2.626403236 | 0.00702951  | 0.041840491 | Down |
| A | chrX  | <i>SUPT20HL2</i> | 0.011520284 | -6.439679961 | 7.70E-13    | 5.03E-10    | Down |
| A | chr9  | <i>SWI5</i>      | 2.372378264 | 1.246334059  | 0.003144961 | 0.024147748 | Up   |
| A | chr16 | <i>FHOD1</i>     | 0.354922063 | -1.494425837 | 0.006628642 | 0.040112966 | Down |
| A | chr16 | <i>ABCA3</i>     | 0.395650002 | -1.33770333  | 2.37E-05    | 0.000744739 | Down |
| A | chr13 | <i>RCBTB1</i>    | 2.247836444 | 1.168537067  | 0.001371997 | 0.013644476 | Up   |
| A | chr19 | <i>FBL</i>       | 0.594268813 | -0.750812423 | 0.001890974 | 0.017046193 | Down |
| A | chr3  | <i>KIF15</i>     | 2.156274503 | 1.108540851  | 0.000439263 | 0.006225518 | Up   |
| A | chr10 | <i>CDC123</i>    | 2.03517656  | 1.025153959  | 0.007890819 | 0.04541396  | Up   |
| A | chrX  | <i>LONRF3</i>    | 3.023359627 | 1.596152597  | 0.000287979 | 0.00455084  | Up   |
| A | chr6  | <i>C6orf170</i>  | 5.13464071  | 2.360263329  | 4.30E-05    | 0.001184956 | Up   |
| A | chr7  | <i>MYL10</i>     | 10.99677809 | 3.459008989  | 0.000634059 | 0.008050951 | Up   |

|   |       |                 |             |              |             |             |      |
|---|-------|-----------------|-------------|--------------|-------------|-------------|------|
| A | chr1  | <i>EPRS</i>     | 1.817448544 | 0.861914518  | 0.000477973 | 0.006602103 | Up   |
| A | chr11 | <i>PRG2</i>     | Inf         | Inf          | 0.000588447 | 0.007665672 | Up   |
| A | chr22 | <i>PLA2G6</i>   | 0.372109602 | -1.426200475 | 8.41E-05    | 0.001930202 | Down |
| A | chr1  | <i>IFI44L</i>   | 0.067131562 | -3.896864976 | 0.003566877 | 0.02631035  | Down |
| A | chr16 | <i>KCTD5</i>    | 2.247853354 | 1.16854792   | 0.008584079 | 0.048109914 | Up   |
| A | chrX  | <i>IQSEC2</i>   | 0.322037236 | -1.634700583 | 0.000236009 | 0.003954597 | Down |
| A | chr2  | <i>KIF1A</i>    | 0.263484915 | -1.924207727 | 0.002928878 | 0.022953044 | Down |
| A | chr1  | <i>ATP1A1</i>   | 0.575409244 | -0.797339697 | 0.000432669 | 0.006152209 | Down |
| A | chr1  | <i>ATP1A2</i>   | 0.476594227 | -1.069166619 | 0.001058898 | 0.011432421 | Down |
| A | chr2  | <i>CNTNAP5</i>  | 0.043236835 | -4.531595279 | 2.90E-05    | 0.000877141 | Down |
| A | chr1  | <i>ATP1A4</i>   | 0.38728894  | -1.368517793 | 7.39E-06    | 0.000316029 | Down |
| A | chr3  | <i>SATB1</i>    | 0.578847859 | -0.788743885 | 0.003288306 | 0.024940882 | Down |
| A | chr16 | <i>XPO6</i>     | 0.645572515 | -0.631348938 | 0.00741829  | 0.043402484 | Down |
| A | chr16 | <i>SNORA46</i>  | 0.074681805 | -3.743099385 | 2.09E-06    | 0.000122369 | Down |
| A | chr1  | <i>PIAS3</i>    | 0.369339252 | -1.436981499 | 6.45E-05    | 0.001592701 | Down |
| A | chr5  | <i>FAM53C</i>   | 0.392423758 | -1.349515707 | 3.00E-06    | 0.000161546 | Down |
| A | chr19 | <i>CLPTM1</i>   | 0.563418251 | -0.827721797 | 0.001242481 | 0.012822287 | Down |
| A | chr2  | <i>BUB1</i>     | 3.09404695  | 1.629495089  | 4.69E-06    | 0.00022652  | Up   |
| A | chrX  | <i>USP9X</i>    | 1.592367259 | 0.671173114  | 0.004093461 | 0.029023329 | Up   |
| A | chr3  | <i>ALG3</i>     | 0.30679374  | -1.704659049 | 0.00014645  | 0.002819189 | Down |
| A | chrX  | <i>RRAGB</i>    | 2.941686687 | 1.556643596  | 2.90E-05    | 0.000877141 | Up   |
| A | chr7  | <i>CALU</i>     | 2.177315822 | 1.122550687  | 3.03E-05    | 0.000904362 | Up   |
| A | chr9  | <i>PIGO</i>     | 0.410359015 | -1.285041447 | 0.000967562 | 0.010739446 | Down |
| A | chr2  | <i>BCL11A</i>   | 0.584169121 | -0.775541995 | 0.004385854 | 0.030402844 | Down |
| A | chr11 | <i>CYBASC3</i>  | 0.378412511 | -1.401968307 | 0.000774506 | 0.009232535 | Down |
| A | chr18 | <i>RNMT</i>     | 2.034091246 | 1.024384398  | 0.0024027   | 0.020014321 | Up   |
| A | chr5  | <i>TENM2</i>    | 0           | #NAME?       | 1.74E-06    | 0.000107473 | Down |
| A | chrX  | <i>ITGB1BP2</i> | 4.742048256 | 2.245510344  | 0.000656799 | 0.008196179 | Up   |
| A | chr9  | <i>CACNA1B</i>  | 0.119470373 | -3.065275201 | 0.001534391 | 0.014813909 | Down |
| A | chr9  | <i>ZNF367</i>   | 2.199336182 | 1.137068146  | 0.00059681  | 0.00772067  | Up   |
| A | chr9  | <i>TESK1</i>    | 0.392975855 | -1.347487421 | 0.000652589 | 0.00819062  | Down |
| A | chr5  | <i>SLC12A2</i>  | 1.800558741 | 0.848444666  | 0.006941325 | 0.041455275 | Up   |
| A | chr17 | <i>PDK2</i>     | 0.205035159 | -2.286056772 | 8.69E-08    | 1.15E-05    | Down |
| A | chr4  | <i>TENM3</i>    | 0.014918125 | -6.066789978 | 1.41E-05    | 0.000504587 | Down |
| A | chr12 | <i>H2AFJ</i>    | 0.151647085 | -2.721210333 | 3.83E-18    | 7.14E-15    | Down |
| A | chr11 | <i>H2AFX</i>    | 0.38030607  | -1.394767129 | 7.71E-05    | 0.00181448  | Down |
| A | chr8  | <i>LOXL2</i>    | 0.335083293 | -1.577408338 | 0.002335336 | 0.019628556 | Down |
| A | chr16 | <i>SIAH1</i>    | 3.387958439 | 1.760416177  | 0.003051462 | 0.023596407 | Up   |
| A | chr9  | <i>SMU1</i>     | 1.775010063 | 0.827827204  | 0.003727335 | 0.027150055 | Up   |
| A | chr7  | <i>ZMIZ2</i>    | 0.237767041 | -2.072379352 | 7.08E-06    | 0.000305997 | Down |
| A | chr7  | <i>AKAP9</i>    | 1.819586667 | 0.863610768  | 0.002243806 | 0.019130238 | Up   |
| A | chr21 | <i>SIK1</i>     | 0.370779347 | -1.431367209 | 8.19E-05    | 0.001898511 | Down |
| A | chr1  | <i>TRNAU1AP</i> | 1.935938343 | 0.953033006  | 0.003124131 | 0.024016069 | Up   |
| A | chr9  | <i>NOTCH1</i>   | 0.247295707 | -2.015690897 | 2.53E-06    | 0.000141693 | Down |

|   |       |                  |             |              |             |             |      |
|---|-------|------------------|-------------|--------------|-------------|-------------|------|
| A | chr3  | <i>RAB7A</i>     | 0.571769212 | -0.806495157 | 0.004684513 | 0.031715225 | Down |
| A | chr7  | <i>TBXAS1</i>    | 1.873608256 | 0.905819338  | 0.005647032 | 0.035851509 | Up   |
| A | chr2  | <i>XDH</i>       | 0.336336207 | -1.572024002 | 0.000849678 | 0.009867297 | Down |
| A | chr2  | <i>CCDC88A</i>   | 2.29262314  | 1.196999225  | 1.82E-05    | 0.000612677 | Up   |
| A | chr1  | <i>RSBN1</i>     | 1.717156453 | 0.780021492  | 0.001806616 | 0.016502278 | Up   |
| A | chr3  | <i>SEMA3F</i>    | 0.061441512 | -4.024642462 | 0.008767332 | 0.048780897 | Down |
| A | chr15 | <i>MAN2A2</i>    | 0.410326466 | -1.285155883 | 0.002231117 | 0.019117077 | Down |
| A | chr9  | <i>HNRNPK</i>    | 1.707292912 | 0.771710596  | 0.001586951 | 0.015164328 | Up   |
| A | chr1  | <i>SLC41A1</i>   | 0.534010454 | -0.905060111 | 0.003593597 | 0.026456413 | Down |
| A | chr9  | <i>NUP188</i>    | 0.580757017 | -0.783993415 | 0.001407839 | 0.013869069 | Down |
| A | chr17 | <i>PIGS</i>      | 0.494264583 | -1.016644563 | 0.007348527 | 0.043090893 | Down |
| A | chr11 | <i>ADRBK1</i>    | 0.525738083 | -0.92758385  | 8.31E-05    | 0.001915951 | Down |
| A | chr17 | <i>CASKIN2</i>   | 0.241578393 | -2.049436669 | 7.62E-08    | 1.02E-05    | Down |
| A | chr5  | <i>C5orf20</i>   | 0.115866215 | -3.109468132 | 0.002565858 | 0.021011385 | Down |
| A | chr8  | <i>FNTA</i>      | 1.821310341 | 0.86497677   | 0.005737706 | 0.036285988 | Up   |
| A | chr18 | <i>DYM</i>       | 0.55066289  | -0.860758709 | 0.002442506 | 0.020268295 | Down |
| A | chr12 | <i>ABCB9</i>     | 0.241115532 | -2.052203509 | 0.003443779 | 0.025755636 | Down |
| A | chr22 | <i>SGSM1</i>     | 0.436837432 | -1.194831611 | 0.004636536 | 0.031538137 | Down |
| A | chr18 | <i>PTPN2</i>     | 1.985412929 | 0.989439092  | 0.006989741 | 0.041641759 | Up   |
| A | chr5  | <i>CHD1</i>      | 1.6044834   | 0.682108864  | 0.005927761 | 0.037039729 | Up   |
| A | chrX  | <i>FMR1</i>      | 2.168589393 | 1.116756915  | 4.83E-05    | 0.001272452 | Up   |
| A | chr2  | <i>PNO1</i>      | 3.480549528 | 1.799315105  | 5.10E-05    | 0.001317861 | Up   |
| A | chr7  | <i>KIAA1324L</i> | 6.804086758 | 2.766401537  | 0.001168661 | 0.012223179 | Up   |
| A | chr4  | <i>LEF1</i>      | 0.242554142 | -2.043621279 | 0.001015187 | 0.011126148 | Down |
| A | chr12 | <i>LRP1</i>      | 0.336536472 | -1.571165228 | 0.003485501 | 0.025983005 | Down |
| A | chr19 | <i>DOT1L</i>     | 0.525560369 | -0.928071605 | 0.008414042 | 0.047462614 | Down |
| A | chr21 | <i>GCFC1</i>     | 2.131512142 | 1.091877274  | 2.92E-05    | 0.000880798 | Up   |
| A | chr1  | <i>CEP350</i>    | 1.764874402 | 0.819565517  | 0.000862518 | 0.009963231 | Up   |
| A | chr2  | <i>ACVR2A</i>    | 2.501484201 | 1.322784341  | 1.03E-05    | 0.000402664 | Up   |
| A | chr19 | <i>SIPA1L3</i>   | 0.303824092 | -1.718691821 | 0.001319366 | 0.013298601 | Down |
| A | chr14 | <i>CCNB1IP1</i>  | 0           | #NAME?       | 0.008291697 | 0.047036732 | Down |
| A | chr1  | <i>ODF2L</i>     | 5.093114372 | 2.348548115  | 7.35E-05    | 0.001760487 | Up   |
| A | chr16 | <i>XYLT1</i>     | 0.463498824 | -1.109362415 | 0.008368505 | 0.047267025 | Down |
| A | chr8  | <i>VPS13B</i>    | 1.724197886 | 0.785925362  | 0.001057154 | 0.011432421 | Up   |
| A | chr9  | <i>MED22</i>     | 0.410770839 | -1.283594329 | 0.003792133 | 0.027484019 | Down |
| A | chr2  | <i>KIF5C</i>     | 0.15553134  | -2.684722778 | 0.000765552 | 0.00915087  | Down |
| A | chr1  | <i>CHD1L</i>     | 2.096566338 | 1.06802848   | 0.002975421 | 0.023200519 | Up   |
| A | chr8  | <i>EIF4EBP1</i>  | 0.339911234 | -1.55677005  | 0.003844327 | 0.027708451 | Down |
| A | chr19 | <i>MPND</i>      | 0.441694981 | -1.178877657 | 0.000878675 | 0.010078515 | Down |
| A | chr17 | <i>TMC6</i>      | 0.252793313 | -1.983969793 | 0.000564778 | 0.007476075 | Down |
| A | chr19 | <i>EEF2</i>      | 0.49100709  | -1.026184238 | 2.64E-06    | 0.000146676 | Down |
| A | chr17 | <i>TMC8</i>      | 0.2834481   | -1.818843495 | 0.001598446 | 0.015251835 | Down |
| A | chr10 | <i>STAM</i>      | 1.733088952 | 0.793345704  | 0.008478944 | 0.047684471 | Up   |
| A | chr20 | <i>RBL1</i>      | 1.943189193 | 0.958426372  | 0.000296457 | 0.004661106 | Up   |

|   |       |                 |             |              |             |             |      |
|---|-------|-----------------|-------------|--------------|-------------|-------------|------|
| A | chr6  | <i>PAK1IP1</i>  | 2.950028255 | 1.560728773  | 0.006197471 | 0.038307351 | Up   |
| A | chr22 | <i>TTC28</i>    | 0.404518443 | -1.305722614 | 0.000178926 | 0.003243778 | Down |
| A | chrX  | <i>LAMP2</i>    | 2.048917004 | 1.034861546  | 0.002738677 | 0.021930886 | Up   |
| A | chr16 | <i>GLIS2</i>    | 0.338379383 | -1.563286427 | 0.001292525 | 0.013129444 | Down |
| A | chr10 | <i>FAM21C</i>   | Inf         | Inf          | 0.005453305 | 0.034961686 | Up   |
| A | chrX  | <i>OFD1</i>     | 3.55792318  | 1.831035361  | 0.001881175 | 0.016973535 | Up   |
| A | chr14 | <i>EML5</i>     | 1.80034316  | 0.848271922  | 0.00529511  | 0.034301275 | Up   |
| A | chr10 | <i>IFIT2</i>    | 4.893709825 | 2.290928559  | 0.0041487   | 0.02935121  | Up   |
| A | chr19 | <i>ELAVL3</i>   | 0.148521037 | -2.751260799 | 0.008253819 | 0.046885444 | Down |
| A | chr6  | <i>SYNCRIP</i>  | 1.808289084 | 0.854625334  | 0.000308057 | 0.004761727 | Up   |
| A | chr2  | <i>METTL5</i>   | 3.532662666 | 1.820755993  | 0.000153045 | 0.002897896 | Up   |
| A | chr11 | <i>EXT2</i>     | 0.51123314  | -0.967946734 | 0.000232516 | 0.003921235 | Down |
| A | chr2  | <i>PRPF40A</i>  | 2.002526281 | 1.001821177  | 6.29E-05    | 0.00156274  | Up   |
| A | chr19 | <i>GSK3A</i>    | 0.541888136 | -0.883933033 | 0.000569475 | 0.00748576  | Down |
| A | chr7  | <i>ICA1</i>     | 2.889185764 | 1.530662967  | 5.86E-06    | 0.000266472 | Up   |
| A | chr1  | <i>15-Sep</i>   | 1.972204252 | 0.979808973  | 0.003505943 | 0.026064663 | Up   |
| A | chr1  | <i>DTL</i>      | 1.847740599 | 0.885762234  | 0.000990807 | 0.010913922 | Up   |
| A | chr1  | <i>QSOX1</i>    | 0.418376157 | -1.257127458 | 0.002748903 | 0.021932413 | Down |
| A | chr5  | <i>TBC1D9B</i>  | 0.599154103 | -0.739000982 | 0.001741169 | 0.016106334 | Down |
| A | chr13 | <i>HS6ST3</i>   | 0.022377187 | -5.481827477 | 0.000803147 | 0.009487313 | Down |
| A | chr5  | <i>XRCC4</i>    | 7.662634327 | 2.93784046   | 3.58E-07    | 3.31E-05    | Up   |
| A | chr14 | <i>RALGAPA1</i> | 1.789488643 | 0.839547387  | 0.004838449 | 0.032441487 | Up   |
| A | chr19 | <i>SCAF1</i>    | 0.223591359 | -2.161063658 | 4.64E-07    | 4.04E-05    | Down |
| A | chr10 | <i>HPS1</i>     | 0.49101378  | -1.02616458  | 0.00172619  | 0.015991455 | Down |
| A | chr7  | <i>SGCE</i>     | 2.175636347 | 1.121437433  | 0.008105643 | 0.046351244 | Up   |
| A | chr3  | <i>TOMM70A</i>  | 1.985301871 | 0.98935839   | 0.002133354 | 0.018589236 | Up   |
| A | chr19 | <i>FZR1</i>     | 0.318895204 | -1.648845696 | 2.18E-08    | 3.96E-06    | Down |
| A | chr5  | <i>FST</i>      | 0.01777796  | -5.81376639  | 6.30E-05    | 0.001564552 | Down |
| A | chr6  | <i>PPARD</i>    | 0.179773093 | -2.475750987 | 7.44E-05    | 0.001775951 | Down |
| A | chr5  | <i>PCDHGA4</i>  | 0.194269954 | -2.363865308 | 0.000540211 | 0.007239415 | Down |
| A | chr13 | <i>GPR183</i>   | 0.232872278 | -2.102389187 | 0.001265142 | 0.012962241 | Down |
| A | chr8  | <i>ZNF703</i>   | 0.037839037 | -4.723980805 | 1.13E-09    | 3.21E-07    | Down |
| A | chr11 | <i>PTPN5</i>    | 0.055297361 | -4.176645555 | 0.005491975 | 0.035175048 | Down |
| A | chr2  | <i>ITM2C</i>    | 0.574599651 | -0.799370978 | 0.005809676 | 0.036581623 | Down |
| A | chr17 | <i>CDC27</i>    | 1.715779191 | 0.7788639    | 0.001849642 | 0.016824656 | Up   |
| A | chr15 | <i>TMOD3</i>    | 1.802118901 | 0.849694201  | 0.00425638  | 0.029772312 | Up   |
| A | chr3  | <i>DZIP3</i>    | 2.225299627 | 1.153999602  | 0.000299954 | 0.004694603 | Up   |
| A | chr13 | <i>N6AMT2</i>   | Inf         | Inf          | 0.003034292 | 0.023514706 | Up   |
| A | chr17 | <i>P2RX1</i>    | 3.142619206 | 1.65196747   | 0.003156886 | 0.02419661  | Up   |
| A | chr10 | <i>FAM208B</i>  | 2.59112205  | 1.373576973  | 0.000191978 | 0.003418678 | Up   |
| A | chr19 | <i>ATP1A3</i>   | 0.198675138 | -2.331516748 | 1.37E-07    | 1.63E-05    | Down |
| A | chr8  | <i>CPQ</i>      | 1.818119002 | 0.862446632  | 0.00239853  | 0.020005117 | Up   |
| A | chr19 | <i>ZNF426</i>   | 2.512792728 | 1.329291673  | 0.002818982 | 0.022332958 | Up   |
| A | chr19 | <i>CDC34</i>    | 0.51518007  | -0.956851311 | 0.006370267 | 0.039019755 | Down |

|   |       |                 |             |              |             |             |      |
|---|-------|-----------------|-------------|--------------|-------------|-------------|------|
| A | chr13 | <i>DNAJC3</i>   | 2.085456707 | 1.060363363  | 0.000723606 | 0.008802642 | Up   |
| A | chr19 | <i>LIN37</i>    | 0.463249935 | -1.11013732  | 0.008894995 | 0.049302069 | Down |
| A | chr18 | <i>CXXC1</i>    | 0.487331912 | -1.037023397 | 0.001300978 | 0.013164084 | Down |
| A | chr1  | <i>SUCO</i>     | 1.987601884 | 0.991028814  | 0.000100575 | 0.002166345 | Up   |
| A | chr1  | <i>ZNF496</i>   | 0.366419146 | -1.448433207 | 0.002083919 | 0.018292798 | Down |
| A | chr2  | <i>SRSF7</i>    | 1.85370125  | 0.890408752  | 0.000401782 | 0.005840161 | Up   |
| A | chr3  | <i>KPNA1</i>    | 1.669236235 | 0.739188143  | 0.004478468 | 0.030799497 | Up   |
| A | chr3  | <i>KPNA4</i>    | 1.588382781 | 0.667558626  | 0.006222941 | 0.038405697 | Up   |
| A | chr5  | <i>PCDHGB6</i>  | 8.278683055 | 3.049401287  | 0.002908784 | 0.022831242 | Up   |
| A | chr16 | <i>COG7</i>     | 0.472903147 | -1.080383351 | 0.001004268 | 0.011034271 | Down |
| A | chr12 | <i>BICD1</i>    | 2.217030288 | 1.14862848   | 0.000607393 | 0.007826554 | Up   |
| A | chr7  | <i>MKLN1</i>    | 1.825771146 | 0.86850594   | 0.000622656 | 0.007944798 | Up   |
| A | chr1  | <i>DNTTIP2</i>  | 2.970740556 | 1.570822616  | 4.57E-05    | 0.001228943 | Up   |
| A | chr16 | <i>CBFA2T3</i>  | 0.127623814 | -2.970030539 | 4.32E-05    | 0.001184956 | Down |
| A | chr19 | <i>ZNF431</i>   | 3.390438985 | 1.761472082  | 0.00314442  | 0.024147748 | Up   |
| A | chr19 | <i>NFIC</i>     | 0.409699122 | -1.287363294 | 0.003626143 | 0.026617592 | Down |
| A | chr19 | <i>ZNF433</i>   | 2.132073935 | 1.092257468  | 0.004269515 | 0.029802128 | Up   |
| A | chr12 | <i>SETD1B</i>   | 0.184004285 | -2.442188733 | 0.001896194 | 0.017057902 | Down |
| A | chrX  | <i>TMEM164</i>  | 0.474898365 | -1.074309306 | 2.73E-05    | 0.000837565 | Down |
| A | chr5  | <i>FAM172A</i>  | 1.966150005 | 0.975373394  | 0.000866409 | 0.009989112 | Up   |
| A | chr2  | <i>ZC3H15</i>   | 2.303983005 | 1.204130075  | 0.000220054 | 0.003740059 | Up   |
| A | chr19 | <i>NFIX</i>     | 0.460912629 | -1.117434796 | 0.000890534 | 0.010160967 | Down |
| A | chr1  | <i>PLA2G4A</i>  | 2.501447321 | 1.32276307   | 1.04E-05    | 0.000403634 | Up   |
| A | chr17 | <i>UBALD2</i>   | 0.458821203 | -1.123996031 | 0.008642865 | 0.048397822 | Down |
| A | chr10 | <i>HHEX</i>     | 0.278365139 | -1.844949546 | 6.28E-06    | 0.000274136 | Down |
| A | chr6  | <i>BRPF3</i>    | 0.444688869 | -1.169131803 | 0.004682174 | 0.031715225 | Down |
| A | chr5  | <i>NUDT12</i>   | 5.352699249 | 2.420266595  | 0.000937614 | 0.010505302 | Up   |
| A | chr19 | <i>ARHGAP33</i> | 0.270417985 | -1.886736991 | 3.59E-06    | 0.0001867   | Down |
| A | chr15 | <i>EDC3</i>     | 0.363454022 | -1.460155225 | 8.55E-05    | 0.001948355 | Down |
| A | chr3  | <i>IFRD2</i>    | 0.509405909 | -0.973112401 | 0.006058246 | 0.0376384   | Down |
| A | chr19 | <i>ZNF440</i>   | 14.6538007  | 3.873202994  | 7.43E-06    | 0.000316029 | Up   |
| A | chr12 | <i>NUP37</i>    | 5.604183453 | 2.486504183  | 2.44E-06    | 0.000138685 | Up   |
| A | chr19 | <i>SMG9</i>     | 0.482923208 | -1.050134298 | 0.003513647 | 0.026064663 | Down |
| A | chr2  | <i>PPM1G</i>    | 0.622275192 | -0.684375362 | 0.00442252  | 0.030543469 | Down |
| A | chr6  | <i>SENP6</i>    | 2.070518788 | 1.049992294  | 3.43E-05    | 0.00100086  | Up   |
| A | chr19 | <i>RBM42</i>    | 0.423365526 | -1.240024296 | 4.72E-05    | 0.001252313 | Down |
| A | chr5  | <i>SLU7</i>     | 2.295435945 | 1.198768173  | 0.000900393 | 0.010208926 | Up   |
| A | chr17 | <i>GALK1</i>    | 0.494615859 | -1.015619597 | 0.001554898 | 0.014925338 | Down |
| A | chr1  | <i>ADSS</i>     | 1.824746324 | 0.867695915  | 0.003501641 | 0.026064663 | Up   |
| A | chr1  | <i>ABCB10</i>   | 0.314134251 | -1.670546843 | 0.000474765 | 0.006571698 | Down |
| A | chr3  | <i>COL7A1</i>   | 0.051717702 | -4.273198008 | 0.003090041 | 0.023856652 | Down |
| A | chr16 | <i>DHODH</i>    | 0.483266575 | -1.049108881 | 0.007404438 | 0.043360307 | Down |
| A | chr15 | <i>UBE3A</i>    | 2.125033472 | 1.087485566  | 0.000137267 | 0.00270249  | Up   |
| A | chr1  | <i>SKI</i>      | 0.388651766 | -1.363450025 | 9.77E-05    | 0.002124882 | Down |

|   |       |                     |             |              |             |             |      |
|---|-------|---------------------|-------------|--------------|-------------|-------------|------|
| A | chr19 | <i>CCDC97</i>       | 0.296626274 | -1.753281702 | 0.006602268 | 0.040021924 | Down |
| A | chr14 | <i>RBM25</i>        | 1.683634344 | 0.751578844  | 0.002171806 | 0.018833916 | Up   |
| A | chr6  | <i>PGM3</i>         | 2.749059189 | 1.458937969  | 0.002098755 | 0.018382819 | Up   |
| A | chr17 | <i>SPNS2</i>        | 0.580664806 | -0.7842225   | 0.001747894 | 0.016135259 | Down |
| A | chr17 | <i>SPNS3</i>        | 0.388036795 | -1.365734636 | 0.002304752 | 0.019497038 | Down |
| A | chr8  | <i>WWP1</i>         | 2.334195232 | 1.222925233  | 3.08E-05    | 0.000916955 | Up   |
| A | chr10 | <i>TYSND1</i>       | 0.295547094 | -1.758540059 | 0.005949205 | 0.037102233 | Down |
| A | chr19 | <i>STRN4</i>        | 0.588260562 | -0.765472777 | 0.005391841 | 0.034744636 | Down |
| A | chr11 | <i>SIPA1</i>        | 0.381439516 | -1.390473786 | 1.35E-06    | 9.18E-05    | Down |
| A | chr5  | <i>FAM174A</i>      | 6.755830726 | 2.75613318   | 0.000111054 | 0.002310977 | Up   |
| A | chr6  | <i>PRPF4B</i>       | 1.831672389 | 0.873161488  | 0.000316908 | 0.004860864 | Up   |
| A | chr3  | <i>IQSEC1</i>       | 0.423788255 | -1.23858449  | 1.97E-05    | 0.000647943 | Down |
| A | chr1  | <i>PYGO2</i>        | 0.287609521 | -1.797816659 | 0.000192534 | 0.003423912 | Down |
| A | chr5  | <i>FNIP1</i>        | 1.746400879 | 0.804384761  | 0.001764605 | 0.016233288 | Up   |
| A | chr19 | <i>TIMM13</i>       | 0.488941428 | -1.032266446 | 0.002687723 | 0.021682848 | Down |
| A | chr4  | <i>IDUA</i>         | 0.326112643 | -1.616557723 | 0.00189783  | 0.017060861 | Down |
| A | chr15 | <i>LOC100507217</i> | 2.663848324 | 1.413511939  | 0.000656228 | 0.008196179 | Up   |
| A | chr11 | <i>PITPNM1</i>      | 0.405309521 | -1.302904029 | 6.98E-05    | 0.001698885 | Down |
| A | chr16 | <i>RANBP10</i>      | 0.342126992 | -1.547396164 | 3.64E-07    | 3.35E-05    | Down |
| A | chr13 | <i>RBM26</i>        | 1.565526304 | 0.646647749  | 0.00872123  | 0.04862616  | Up   |
| A | chr7  | <i>KCNH2</i>        | 0.353460785 | -1.500377932 | 0.002678232 | 0.021646413 | Down |
| A | chr16 | <i>SPNS1</i>        | 0.412965742 | -1.275905989 | 0.000729246 | 0.008846515 | Down |
| A | chr7  | <i>SNORA22</i>      | 0.122428923 | -3.029983667 | 0.000753563 | 0.009055469 | Down |
| A | chr3  | <i>TRNT1</i>        | 3.897397817 | 1.962511198  | 0.000375872 | 0.005562008 | Up   |
| A | chrX  | <i>PDZD4</i>        | 0.386197022 | -1.372591057 | 0.003855187 | 0.027747536 | Down |
| A | chr11 | <i>ZBTB3</i>        | 0.334751603 | -1.57883713  | 0.00086782  | 0.009989112 | Down |
| A | chr4  | <i>PCNAP1</i>       | 2.118468341 | 1.083021569  | 0.003880663 | 0.027877985 | Up   |
| A | chrX  | <i>PRAF2</i>        | 0.141086459 | -2.825348566 | 0.00394245  | 0.028182259 | Down |
| A | chr12 | <i>UBE3B</i>        | 0.389629728 | -1.359824339 | 0.00012067  | 0.002445808 | Down |
| A | chr2  | <i>ARHGAP15</i>     | 1.704275601 | 0.769158654  | 0.002131343 | 0.018584117 | Up   |
| A | chr17 | <i>TMEM104</i>      | 0.339883219 | -1.55688896  | 0.002439913 | 0.020259659 | Down |
| A | chr2  | <i>ETAA1</i>        | 3.090876347 | 1.628015939  | 0.000433112 | 0.006152209 | Up   |
| A | chr11 | <i>RBM14</i>        | 0.31785998  | -1.653536708 | 3.57E-07    | 3.31E-05    | Down |
| A | chr1  | <i>LPGAT1</i>       | 2.637196312 | 1.399004969  | 0.000136891 | 0.002699147 | Up   |
| A | chr11 | <i>GTF2H1</i>       | 1.901958925 | 0.92748609   | 0.002379225 | 0.019882215 | Up   |
| A | chr14 | <i>SCFD1</i>        | 2.374299982 | 1.247502225  | 0.001058529 | 0.011432421 | Up   |
| A | chr16 | <i>GSE1</i>         | 0.430845083 | -1.214758874 | 0.001175205 | 0.012256335 | Down |
| A | chr10 | <i>DNAUC1</i>       | 1.809298216 | 0.855430219  | 0.006775151 | 0.040641565 | Up   |
| A | chrX  | <i>BHLHB9</i>       | 4.24996906  | 2.087452338  | 9.85E-08    | 1.27E-05    | Up   |
| A | chr22 | <i>DGCR2</i>        | 0.498134113 | -1.005393881 | 0.000593294 | 0.007693406 | Down |
| A | chr12 | <i>TMTC3</i>        | 2.83422616  | 1.502954884  | 0.000488141 | 0.006692973 | Up   |
| A | chr4  | <i>SRP72</i>        | 1.690127067 | 0.757131716  | 0.004820399 | 0.032383258 | Up   |
| A | chr16 | <i>RPS2</i>         | 0.148521037 | -2.751260799 | 0.003907607 | 0.027994511 | Down |
| A | chrX  | <i>SRPK3</i>        | 3.08622772  | 1.625844516  | 0.000563084 | 0.007469448 | Up   |

|   |       |                 |             |              |             |             |      |
|---|-------|-----------------|-------------|--------------|-------------|-------------|------|
| A | chr18 | <i>ADNP2</i>    | 0.480779599 | -1.056552414 | 0.001962905 | 0.017477352 | Down |
| A | chr5  | <i>GPBP1</i>    | 1.661051266 | 0.7320966    | 0.002580847 | 0.021104644 | Up   |
| A | chr17 | <i>SP2</i>      | 0.183987582 | -2.442319696 | 4.01E-08    | 6.23E-06    | Down |
| A | chr14 | <i>SPTB</i>     | 0.285904843 | -1.806393038 | 2.02E-05    | 0.000660877 | Down |
| A | chr17 | <i>DVL2</i>     | 0.354176781 | -1.497458461 | 3.68E-06    | 0.000190038 | Down |
| A | chr7  | <i>ZNF117</i>   | 3.432662183 | 1.779327885  | 3.84E-05    | 0.001096893 | Up   |
| A | chr10 | <i>PLXDC2</i>   | 3.861700823 | 1.949236399  | 0.000194825 | 0.003443062 | Up   |
| A | chr17 | <i>NUFIP2</i>   | 1.650020604 | 0.722484039  | 0.002514074 | 0.020691181 | Up   |
| A | chr11 | <i>ATG2A</i>    | 0.313001166 | -1.675760061 | 8.36E-05    | 0.001924565 | Down |
| A | chr19 | <i>ZFP28</i>    | 3.665440314 | 1.873986514  | 0.00309569  | 0.023881821 | Up   |
| A | chr12 | <i>CMKLR1</i>   | 0.023040567 | -5.439679961 | 1.38E-06    | 9.18E-05    | Down |
| A | chr5  | <i>ARAP3</i>    | 0.421979989 | -1.244753511 | 0.002560397 | 0.020979829 | Down |
| A | chr19 | <i>C19orf47</i> | 0.30333943  | -1.720995052 | 0.00069251  | 0.008501209 | Down |
| A | chr5  | <i>ZMAT2</i>    | 2.819675447 | 1.495529114  | 0.002936756 | 0.022979411 | Up   |
| A | chr17 | <i>FLJ43681</i> | 0.327459178 | -1.610613029 | 0.001356335 | 0.013565889 | Down |
| A | chr19 | <i>MAST3</i>    | 0.306331519 | -1.706834281 | 0.000995238 | 0.01094426  | Down |
| A | chr17 | <i>DYNLL2</i>   | 0.357238451 | -1.485040722 | 6.27E-07    | 4.97E-05    | Down |
| A | chr1  | <i>ITPKB</i>    | 0.498527991 | -1.004253583 | 0.005686225 | 0.036062607 | Down |
| A | chr16 | <i>CHTF18</i>   | 0.297650483 | -1.748308858 | 0.006702295 | 0.040408805 | Down |
| A | chr7  | <i>SKAP2</i>    | 1.938289813 | 0.954784298  | 0.000331412 | 0.005030142 | Up   |
| A | chr11 | <i>SLC37A4</i>  | 0.499159245 | -1.002427947 | 0.006670595 | 0.04029212  | Down |
| A | chr1  | <i>CELSR2</i>   | 0.321537654 | -1.636940399 | 0.005872828 | 0.036837106 | Down |
| A | chr8  | <i>MTMR9</i>    | 0.121043553 | -3.046401858 | 0.001406638 | 0.013867709 | Down |
| A | chr22 | <i>SEC14L2</i>  | 0.193540764 | -2.369290633 | 0.002174588 | 0.018835367 | Down |
| A | chr2  | <i>SSB</i>      | 3.582096244 | 1.8408041    | 0.000250687 | 0.004115996 | Up   |
| A | chr8  | <i>EMC2</i>     | 2.613868374 | 1.386186493  | 0.00174607  | 0.016129833 | Up   |
| A | chr20 | <i>TRMT6</i>    | 2.219657095 | 1.150336818  | 0.001034788 | 0.011277494 | Up   |
| A | chr3  | <i>USP19</i>    | 0.499874735 | -1.000361484 | 0.001629608 | 0.015447546 | Down |
| A | chr13 | <i>NBEA</i>     | 2.720700597 | 1.443978202  | 6.20E-05    | 0.001548367 | Up   |
| A | chr22 | <i>SMTN</i>     | 0.327687331 | -1.609608199 | 0.00518103  | 0.03381399  | Down |
| A | chr11 | <i>NAP1L4</i>   | 1.781873951 | 0.833395284  | 0.004076488 | 0.028934416 | Up   |
| A | chr17 | <i>SLC4A1</i>   | 0.086355254 | -3.533572234 | 1.61E-09    | 4.48E-07    | Down |
| A | chr1  | <i>CACHD1</i>   | 0.100451121 | -3.315434425 | 0.003281625 | 0.024933091 | Down |
| A | chr8  | <i>SDCBP</i>    | 1.928756554 | 0.947671059  | 0.003806684 | 0.02751309  | Up   |
| A | chr4  | <i>ARAP2</i>    | 2.065579313 | 1.046546457  | 0.005346216 | 0.034563724 | Up   |
| A | chr20 | <i>NFATC2</i>   | 0.205477299 | -2.28294908  | 6.60E-08    | 9.26E-06    | Down |
| A | chr16 | <i>ACD</i>      | 0.175721416 | -2.508638064 | 1.21E-05    | 0.000454011 | Down |
| A | chr14 | <i>STRN3</i>    | 2.062689903 | 1.044526948  | 3.58E-05    | 0.001035325 | Up   |
| A | chr8  | <i>EFR3A</i>    | 2.057727918 | 1.041052235  | 9.34E-05    | 0.002062619 | Up   |
| A | chr15 | <i>MYO1E</i>    | 0.370241186 | -1.433462705 | 0.007989168 | 0.045867516 | Down |
| A | chr1  | <i>MFN2</i>     | 0.584231563 | -0.775387793 | 0.006434577 | 0.039266262 | Down |
| A | chr19 | <i>ZFP36</i>    | 0.310088408 | -1.689248501 | 0.000147591 | 0.002820645 | Down |
| A | chr4  | <i>TMA16</i>    | 3.684439016 | 1.881444975  | 0.003426864 | 0.025751787 | Up   |
| A | chr1  | <i>SCMH1</i>    | 0.51610294  | -0.954269246 | 0.004004106 | 0.028529254 | Down |

|   |       |                 |             |              |             |             |      |
|---|-------|-----------------|-------------|--------------|-------------|-------------|------|
| A | chr7  | <i>FGL2</i>     | 3.002316198 | 1.586075927  | 4.37E-05    | 0.001191841 | Up   |
| A | chr14 | <i>REC8</i>     | 0.185916649 | -2.427272128 | 0.000509915 | 0.006911658 | Down |
| A | chr6  | <i>SERPINB1</i> | 2.09471228  | 1.066752095  | 0.002121887 | 0.018538432 | Up   |
| A | chr10 | <i>SGMS1</i>    | 1.901494716 | 0.92713393   | 0.000396228 | 0.005778728 | Up   |
| A | chrX  | <i>MOSPD1</i>   | 2.997593729 | 1.583804865  | 0.000448885 | 0.006327528 | Up   |
| A | chrX  | <i>MOSPD2</i>   | 4.091906291 | 2.032773106  | 3.93E-05    | 0.001112997 | Up   |
| A | chr11 | <i>PGM2L1</i>   | 1.843571519 | 0.882503385  | 0.001644773 | 0.015546141 | Up   |
| A | chr11 | <i>ACAT1</i>    | 1.80734295  | 0.853870289  | 0.002550463 | 0.020923991 | Up   |
| A | chr1  | <i>RRP15</i>    | 4.268070875 | 2.093584133  | 0.001401874 | 0.01383128  | Up   |
| A | chr1  | <i>CTSE</i>     | 0.362196335 | -1.465156147 | 0.003603674 | 0.026485783 | Down |
| A | chr4  | <i>DHX15</i>    | 1.773506598 | 0.826604697  | 0.000470256 | 0.00654398  | Up   |
| A | chr3  | <i>TRAK1</i>    | 0.376990333 | -1.407400566 | 2.47E-05    | 0.000771007 | Down |
| A | chr10 | <i>GTPBP4</i>   | 1.953664446 | 0.966182697  | 0.00247016  | 0.020432255 | Up   |
| A | chr5  | <i>DMXL1</i>    | 1.827409395 | 0.869799878  | 0.000332516 | 0.00503518  | Up   |
| A | chr6  | <i>TUBB</i>     | 0.581852697 | -0.781274131 | 0.000456491 | 0.006400188 | Down |
| A | chr5  | <i>RICTOR</i>   | 1.797080734 | 0.845655224  | 0.001101811 | 0.011751735 | Up   |
| A | chr1  | <i>PDIK1L</i>   | 1.823033902 | 0.866341391  | 0.004118253 | 0.029176822 | Up   |
| A | chr1  | <i>GABPB2</i>   | 2.111836246 | 1.078497971  | 0.007596082 | 0.044220639 | Up   |
| A | chr14 | <i>FUT8</i>     | 2.473801708 | 1.306729863  | 1.11E-07    | 1.40E-05    | Up   |
| A | chr7  | <i>SNORA5C</i>  | 0.297941697 | -1.746898052 | 0.000844651 | 0.009835177 | Down |
| A | chr16 | <i>KATNB1</i>   | 0.533174542 | -0.9073202   | 0.005795177 | 0.036525568 | Down |
| A | chr7  | <i>HOXA3</i>    | 0.24718126  | -2.016358727 | 7.51E-05    | 0.001787889 | Down |
| A | chr3  | <i>TFDP2</i>    | 2.03714407  | 1.026548014  | 0.000349043 | 0.00525497  | Up   |
| A | chr20 | <i>CPNE1</i>    | 0.551267778 | -0.859174819 | 0.002433149 | 0.020217726 | Down |
| A | chr1  | <i>NCSTN</i>    | 0.604413064 | -0.726393252 | 0.00583436  | 0.03670164  | Down |
| A | chr6  | <i>CITED2</i>   | 0.527336509 | -0.923204213 | 0.000252443 | 0.00413962  | Down |
| A | chr7  | <i>HOXA9</i>    | 0.340460063 | -1.554442519 | 0.008942832 | 0.049526433 | Down |
| A | chr5  | <i>MAML1</i>    | 0.401255894 | -1.31740551  | 0.000750551 | 0.009046117 | Down |
| A | chr17 | <i>SMURF2</i>   | 1.772381182 | 0.825688915  | 0.002745511 | 0.021930886 | Up   |
| A | chr11 | <i>RBM4B</i>    | 0.532237783 | -0.909857166 | 0.000431916 | 0.006152209 | Down |
| A | chr15 | <i>FAM169B</i>  | 0.144591057 | -2.789949772 | 0.007704739 | 0.044638243 | Down |
| A | chr1  | <i>RNF220</i>   | 0.405573989 | -1.301962965 | 0.000267061 | 0.004308955 | Down |
| A | chr15 | <i>ATPBD4</i>   | 2.959030162 | 1.565124402  | 6.93E-05    | 0.001691185 | Up   |
| A | chr8  | <i>SCRIB</i>    | 0.490284315 | -1.028309488 | 0.001285738 | 0.013092836 | Down |
| A | chr8  | <i>GFRA2</i>    | 0.092692972 | -3.431396227 | 0.001657379 | 0.015613262 | Down |
| A | chr18 | <i>C18orf54</i> | 26.0693653  | 4.704283554  | 5.56E-06    | 0.000254631 | Up   |
| A | chr11 | <i>LRRC4C</i>   | 0           | #NAME?       | 0.005127768 | 0.033649857 | Down |
| A | chr1  | <i>USP21</i>    | 0.473808534 | -1.07762391  | 0.00019349  | 0.003436217 | Down |
| A | chr5  | <i>TMEM161B</i> | 2.231698897 | 1.158142391  | 0.001615029 | 0.015398808 | Up   |
| A | chr17 | <i>THRA</i>     | 0.574734434 | -0.799032607 | 0.001553375 | 0.014925338 | Down |
| A | chr11 | <i>PIK3C2A</i>  | 2.255838327 | 1.173663675  | 4.09E-05    | 0.001151412 | Up   |
| A | chr12 | <i>NFYB</i>     | 2.823983695 | 1.497731759  | 2.85E-05    | 0.000866865 | Up   |
| A | chr10 | <i>ZRANB1</i>   | 2.301526756 | 1.202591214  | 6.50E-06    | 0.000282683 | Up   |
| A | chr6  | <i>TMEM170B</i> | 2.596061837 | 1.376324748  | 0.001944318 | 0.017352733 | Up   |

|   |       |                 |             |              |             |             |      |
|---|-------|-----------------|-------------|--------------|-------------|-------------|------|
| A | chr17 | <i>LASP1</i>    | 0.568085123 | -0.815820972 | 0.004957958 | 0.032951233 | Down |
| A | chr12 | <i>FBXL14</i>   | 0.248214125 | -2.01034288  | 2.34E-06    | 0.00013399  | Down |
| A | chr19 | <i>NOSIP</i>    | 0.366575564 | -1.447817475 | 0.000129934 | 0.002577547 | Down |
| A | chr2  | <i>USP37</i>    | 1.876926055 | 0.908371814  | 0.000568652 | 0.00748576  | Up   |
| A | chr22 | <i>RNU12</i>    | 0.14373609  | -2.798505744 | 1.39E-26    | 9.04E-23    | Down |
| A | chr14 | <i>BCL11B</i>   | 0.227169655 | -2.138157961 | 0.000936603 | 0.010502985 | Down |
| A | chr3  | <i>ATR</i>      | 2.012215599 | 1.008784891  | 0.000155671 | 0.002927713 | Up   |
| A | chrX  | <i>PDHA1</i>    | 1.812257496 | 0.857787957  | 0.001860652 | 0.016854328 | Up   |
| A | chr4  | <i>NCAPG</i>    | 2.135448201 | 1.094538903  | 0.001120897 | 0.011885516 | Up   |
| A | chr3  | <i>GNAI2</i>    | 0.437647013 | -1.192160372 | 1.31E-07    | 1.58E-05    | Down |
| A | chr8  | <i>PEX2</i>     | 2.190093923 | 1.130992742  | 0.005852594 | 0.036745505 | Up   |
| A | chr7  | <i>GRB10</i>    | 5.976980995 | 2.579416956  | 4.47E-08    | 6.71E-06    | Up   |
| A | chr20 | <i>SNORA51</i>  | 0.205984383 | -2.279393133 | 0.000899576 | 0.010208926 | Down |
| A | chr8  | <i>PTK2</i>     | 2.233258597 | 1.159150316  | 0.005748217 | 0.036317269 | Up   |
| A | chr11 | <i>ARL14EP</i>  | 2.998652213 | 1.584314206  | 0.002241559 | 0.019130238 | Up   |
| A | chr14 | <i>MPP5</i>     | 1.89922664  | 0.925412077  | 0.004736448 | 0.031983891 | Up   |
| A | chr7  | <i>BZW2</i>     | 1.583809667 | 0.663398971  | 0.008313763 | 0.047120948 | Up   |
| A | chr19 | <i>PIH1D1</i>   | 0.443274285 | -1.173728424 | 0.001366569 | 0.01363748  | Down |
| A | chr19 | <i>C19orf6</i>  | 0.478460466 | -1.063528373 | 0.000104748 | 0.002221189 | Down |
| A | chr15 | <i>CHST14</i>   | 0.103682552 | -3.26975496  | 1.16E-08    | 2.36E-06    | Down |
| A | chr6  | <i>ME1</i>      | 0.104677622 | -3.255975043 | 0.000104355 | 0.002221189 | Down |
| A | chr19 | <i>GPR4</i>     | 0.159129683 | -2.651725125 | 0.005869275 | 0.036832523 | Down |
| A | chr16 | <i>MC1R</i>     | 0           | #NAME?       | 0.000128691 | 0.002560666 | Down |
| A | chr1  | <i>EBNA1BP2</i> | 3.661615672 | 1.872480372  | 0.001049879 | 0.011397025 | Up   |
| A | chr12 | <i>LRRK2</i>    | 2.195443007 | 1.134512083  | 0.001137769 | 0.011996201 | Up   |
| A | chr19 | <i>SLC44A2</i>  | 0.517309103 | -0.950901515 | 0.000215049 | 0.003675285 | Down |
| A | chr1  | <i>GFI1</i>     | 0.303872672 | -1.718461161 | 0.00030553  | 0.004752811 | Down |
| A | chr1  | <i>TAGLN2</i>   | 0.508278666 | -0.976308418 | 0.000102595 | 0.002202577 | Down |
| A | chr3  | <i>GOLGA4</i>   | 1.725473882 | 0.786992636  | 0.007287704 | 0.042927078 | Up   |
| A | chr3  | <i>DHX36</i>    | 2.318542544 | 1.2132182    | 1.55E-05    | 0.000545853 | Up   |
| A | chr8  | <i>POP1</i>     | 2.687673723 | 1.426358009  | 0.000754102 | 0.009055469 | Up   |
| A | chr2  | <i>TSSC1</i>    | 2.732297345 | 1.450114495  | 0.00433164  | 0.030074945 | Up   |
| A | chr7  | <i>NOD1</i>     | 0.383321962 | -1.383371435 | 0.006441299 | 0.039276013 | Down |
| A | chr7  | <i>GBAS</i>     | 2.177821552 | 1.122885746  | 0.002998136 | 0.023327386 | Up   |
| A | chr4  | <i>CDS1</i>     | 0.327373483 | -1.610990624 | 0.002416186 | 0.020113821 | Down |
| A | chr3  | <i>ALS2CL</i>   | 4.606608943 | 2.203705132  | 0.000886065 | 0.010130511 | Up   |
| A | chr11 | <i>LIN7C</i>    | 1.834252955 | 0.875192609  | 0.003775113 | 0.027406313 | Up   |
| A | chr10 | <i>PPA1</i>     | 4.258678607 | 2.090405857  | 0.001868045 | 0.016889386 | Up   |
| A | chr19 | <i>RAVER1</i>   | 0.342563492 | -1.545556686 | 9.91E-06    | 0.000391885 | Down |
| A | chr19 | <i>TCF3</i>     | 0.48430297  | -1.046018244 | 0.000920105 | 0.01038041  | Down |
| A | chr16 | <i>SNN</i>      | 0.373655215 | -1.420220435 | 0.000809802 | 0.00955728  | Down |
| A | chr11 | <i>FNBP4</i>    | 1.8178177   | 0.862207526  | 0.000885841 | 0.010130511 | Up   |
| A | chr5  | <i>SLC35A4</i>  | 0.487917892 | -1.035289706 | 0.003873951 | 0.027860428 | Down |
| A | chr20 | <i>PLCB4</i>    | 1.940084235 | 0.956119293  | 0.000925256 | 0.010404252 | Up   |

|   |       |                  |             |              |             |             |      |
|---|-------|------------------|-------------|--------------|-------------|-------------|------|
| A | chr11 | <i>CHEK1</i>     | 2.650823759 | 1.406440755  | 1.95E-05    | 0.000642287 | Up   |
| A | chr15 | <i>MYO5A</i>     | 2.141223074 | 1.098435104  | 1.03E-05    | 0.000402279 | Up   |
| A | chr15 | <i>C15orf39</i>  | 0.205209912 | -2.284827678 | 9.16E-09    | 2.03E-06    | Down |
| A | chr15 | <i>BTBD1</i>     | 1.793739696 | 0.842970544  | 0.003469724 | 0.025894971 | Up   |
| A | chr9  | <i>SETX</i>      | 1.914281909 | 0.936803305  | 0.000271386 | 0.004351838 | Up   |
| A | chr3  | <i>GOLGB1</i>    | 1.842179502 | 0.881413645  | 0.004889761 | 0.032664306 | Up   |
| A | chr16 | <i>RLTPR</i>     | 0.498092732 | -1.005513734 | 0.006783623 | 0.040673694 | Down |
| A | chr1  | <i>SCARNA3</i>   | 0.210236817 | -2.249912757 | 4.28E-06    | 0.000210155 | Down |
| A | chr1  | <i>SCARNA4</i>   | 0.034133684 | -4.872660079 | 1.50E-06    | 9.77E-05    | Down |
| A | chr16 | <i>C16orf58</i>  | 0.282214576 | -1.82513559  | 5.47E-05    | 0.001397103 | Down |
| A | chr1  | <i>RABGGTB</i>   | 3.606534661 | 1.850613289  | 0.006870392 | 0.041061915 | Up   |
| A | chr10 | <i>OBFC1</i>     | 0.250627954 | -1.996380756 | 0.004806367 | 0.03232239  | Down |
| A | chrX  | <i>NRK</i>       | Inf         | Inf          | 0.002728515 | 0.021903635 | Up   |
| A | chr20 | <i>PLAGL2</i>    | 0.454790368 | -1.136726395 | 0.004927561 | 0.032849566 | Down |
| A | chr7  | <i>CUL1</i>      | 2.08503277  | 1.060070058  | 2.33E-05    | 0.000737294 | Up   |
| A | chr1  | <i>ELOVL1</i>    | 0.529897505 | -0.916214762 | 0.001073925 | 0.011518444 | Down |
| A | chr6  | <i>AGPAT1</i>    | 0.251020916 | -1.994120517 | 1.98E-09    | 5.16E-07    | Down |
| A | chr8  | <i>DCAF13</i>    | 2.443293788 | 1.288827348  | 0.008183923 | 0.046709553 | Up   |
| A | chr14 | <i>EGLN3</i>     | 0.446442423 | -1.163453971 | 0.002311421 | 0.019516357 | Down |
| A | chr1  | <i>SCAMP3</i>    | 0.331223172 | -1.594124488 | 9.49E-06    | 0.000377746 | Down |
| A | chr8  | <i>EFHA2</i>     | 2.525445682 | 1.336538012  | 0.007122679 | 0.042240951 | Up   |
| A | chr2  | <i>C2orf44</i>   | 0.192638643 | -2.376030957 | 0.000847819 | 0.009854475 | Down |
| A | chr1  | <i>CEPT1</i>     | 1.806469474 | 0.853172876  | 0.005366462 | 0.034608905 | Up   |
| A | chr14 | <i>SNORD8</i>    | 0.366329885 | -1.448784695 | 0.001509587 | 0.014617686 | Down |
| A | chr3  | <i>SNX4</i>      | 1.724618882 | 0.786277581  | 0.004318176 | 0.030030173 | Up   |
| A | chrX  | <i>GUCY2F</i>    | 0           | #NAME?       | 0.000602466 | 0.007786124 | Down |
| A | chr6  | <i>HIST1H2AE</i> | 0.303009325 | -1.722565904 | 0.000376255 | 0.005562008 | Down |
| A | chr6  | <i>HIST1H2AG</i> | 0.15246443  | -2.713455393 | 1.58E-05    | 0.00055166  | Down |
| A | chr6  | <i>KLHDC3</i>    | 0.402570476 | -1.312686723 | 0.000655358 | 0.008196179 | Down |
| A | chr6  | <i>HIST1H2AH</i> | 0.624601826 | -0.678991308 | 0.00869344  | 0.048548332 | Down |
| A | chr6  | <i>HIST1H2AI</i> | 0.213980601 | -2.224448083 | 7.54E-10    | 2.40E-07    | Down |
| A | chr6  | <i>CASP8AP2</i>  | 2.127262881 | 1.088998328  | 0.000146867 | 0.002819189 | Up   |
| A | chr17 | <i>MIR142</i>    | 0.188364315 | -2.408402416 | 1.02E-09    | 2.95E-07    | Down |
| A | chr10 | <i>FAM178A</i>   | 1.68418781  | 0.752053028  | 0.003187882 | 0.024376932 | Up   |
| A | chr1  | <i>EDEM3</i>     | 1.744388244 | 0.802721173  | 0.002898445 | 0.022763778 | Up   |
| A | chr8  | <i>ANGPT1</i>    | 2.554948448 | 1.353294181  | 1.97E-07    | 2.13E-05    | Up   |
| A | chr19 | <i>ATP13A1</i>   | 0.573269843 | -0.802713707 | 0.001268029 | 0.012981636 | Down |
| A | chr9  | <i>ZFAND5</i>    | 1.7812906   | 0.832922897  | 0.000646625 | 0.0081314   | Up   |
| A | chr6  | <i>CMAHP</i>     | 0.3408554   | -1.552768254 | 5.50E-05    | 0.001401333 | Down |
| A | chr2  | <i>FN1</i>       | 0.152846026 | -2.709849049 | 0.005758802 | 0.036366544 | Down |
| A | chr1  | <i>SHC1</i>      | 0.52476229  | -0.930264044 | 0.002711978 | 0.021825941 | Down |
| A | chr3  | <i>FXR1</i>      | 1.67396959  | 0.74327332   | 0.002471656 | 0.020432255 | Up   |
| A | chr11 | <i>FAM111A</i>   | 4.711363572 | 2.236144668  | 1.77E-05    | 0.000602534 | Up   |
| A | chr3  | <i>RNF123</i>    | 0.492326607 | -1.022312386 | 0.000147396 | 0.002820645 | Down |

|   |       |                  |             |              |             |             |      |
|---|-------|------------------|-------------|--------------|-------------|-------------|------|
| A | chr1  | <i>NECAP2</i>    | 0.411515246 | -1.280982215 | 0.007163897 | 0.042369889 | Down |
| A | chr8  | <i>TAF2</i>      | 1.730876647 | 0.791502913  | 0.004054585 | 0.028810289 | Up   |
| A | chr11 | <i>SNORA3</i>    | 0.166340411 | -2.587789396 | 1.35E-18    | 2.93E-15    | Down |
| A | chr6  | <i>HIST1H2BA</i> | 0.165573661 | -2.594454903 | 0.00515889  | 0.033695171 | Down |
| A | chr7  | <i>ZYX</i>       | 0.324541569 | -1.623524817 | 0.002003866 | 0.017781418 | Down |
| A | chr6  | <i>HIST1H2BF</i> | 0.420364744 | -1.250286421 | 0.005205048 | 0.033900009 | Down |
| A | chr20 | <i>WISP2</i>     | 0.068458322 | -3.868630267 | 0.003675041 | 0.026799057 | Down |
| A | chr6  | <i>HIST1H2BM</i> | 1.827706468 | 0.87003439   | 0.006367697 | 0.039019755 | Up   |
| A | chr8  | <i>ANK1</i>      | 0.18234332  | -2.455270743 | 2.94E-09    | 7.37E-07    | Down |
| A | chr6  | <i>HIST1H2BO</i> | 0.413350005 | -1.274564189 | 0.000280982 | 0.004478215 | Down |
| A | chr2  | <i>DCTN1</i>     | 0.422196104 | -1.24401483  | 1.28E-06    | 8.88E-05    | Down |
| A | chr22 | <i>CABIN1</i>    | 0.535784473 | -0.900275323 | 0.002260498 | 0.019247408 | Down |
| A | chr17 | <i>EFCAB5</i>    | 0.082149986 | -3.605595861 | 0.007157772 | 0.042354157 | Down |
| A | chr19 | <i>CHERP</i>     | 0.374603389 | -1.416564143 | 0.004303256 | 0.029973536 | Down |
| A | chr11 | <i>RIC8A</i>     | 0.5823077   | -0.780146399 | 0.006685514 | 0.040330358 | Down |
| A | chr1  | <i>FBXO42</i>    | 0.40749234  | -1.295155154 | 0.000168261 | 0.003107191 | Down |
| A | chr20 | <i>PCED1A</i>    | 0.446944251 | -1.161833205 | 0.002795174 | 0.022183857 | Down |
| A | chr11 | <i>DNAJC24</i>   | 12.14949833 | 3.602824839  | 0.005706221 | 0.036109189 | Up   |
| A | chr10 | <i>NMT2</i>      | 1.877547349 | 0.908849291  | 0.005990617 | 0.037307027 | Up   |
| A | chr22 | <i>PI4KAP1</i>   | 0.263773418 | -1.922628913 | 0.004949752 | 0.032932992 | Down |
| A | chr12 | <i>IFFO1</i>     | 0.274518882 | -1.865022711 | 5.08E-06    | 0.000240255 | Down |
| A | chr5  | <i>RAD17</i>     | 2.472863866 | 1.30618282   | 0.005837536 | 0.036703928 | Up   |
| A | chr12 | <i>NUAK1</i>     | 0.219217078 | -2.189567902 | 0.002433314 | 0.020217726 | Down |
| A | chr3  | <i>CADM2</i>     | 0           | #NAME?       | 0.000255044 | 0.004166578 | Down |
| A | chr1  | <i>KCNN3</i>     | 0.068126632 | -3.875637309 | 0.000831556 | 0.009726073 | Down |
| A | chrX  | <i>UPRT</i>      | 2.442147188 | 1.288150154  | 0.001032262 | 0.011265987 | Up   |
| A | chr2  | <i>DDX1</i>      | 2.172063055 | 1.119065985  | 0.003582951 | 0.026392921 | Up   |
| A | chr10 | <i>NRP1</i>      | 0.416220071 | -1.264581557 | 0.00196788  | 0.017497776 | Down |
| A | chr9  | <i>RGP1</i>      | 0.573781071 | -0.801427719 | 0.008205274 | 0.046770586 | Down |
| A | chr17 | <i>CACNA1G</i>   | 0.047407894 | -4.39872889  | 6.52E-05    | 0.001605411 | Down |
| A | chr16 | <i>C16orf88</i>  | Inf         | Inf          | 7.94E-06    | 0.000334507 | Up   |
| A | chr13 | <i>IRS2</i>      | 0.367726111 | -1.443296474 | 0.000423761 | 0.006071739 | Down |
| A | chr18 | <i>IMPA2</i>     | 0.511735488 | -0.96652981  | 0.00236136  | 0.019804166 | Down |
| A | chr13 | <i>N4BP2L2</i>   | 1.996494385 | 0.997469014  | 0.000504533 | 0.00687248  | Up   |
| A | chr11 | <i>PTDSS2</i>    | 0.409940038 | -1.286515192 | 0.00092646  | 0.010404252 | Down |
| A | chr10 | <i>TMEM180</i>   | 0.190367965 | -2.393137375 | 4.06E-07    | 3.68E-05    | Down |
| A | chr6  | <i>PRIM2</i>     | 3.336901956 | 1.738509298  | 3.01E-05    | 0.000904245 | Up   |
| A | chr19 | <i>NACC1</i>     | 0.488995619 | -1.032106554 | 0.000162993 | 0.003035018 | Down |
| A | chr1  | <i>PGM1</i>      | 1.819136961 | 0.863254166  | 0.006175047 | 0.038236665 | Up   |
| A | chr15 | <i>MYO9A</i>     | 2.623846689 | 1.391683426  | 4.01E-07    | 3.66E-05    | Up   |
| A | chr4  | <i>METAP1</i>    | 2.330077738 | 1.220378088  | 0.000234577 | 0.003935649 | Up   |
| A | chr1  | <i>RPRD2</i>     | 0.526308693 | -0.926018872 | 0.005832759 | 0.03670164  | Down |
| A | chr7  | <i>FASTK</i>     | 0.519464651 | -0.944902517 | 0.007774348 | 0.044902019 | Down |
| A | chr20 | <i>NAA20</i>     | 2.156717819 | 1.108837429  | 0.006282079 | 0.038697489 | Up   |

|   |       |                  |             |              |             |             |      |
|---|-------|------------------|-------------|--------------|-------------|-------------|------|
| A | chr19 | <i>SARS2</i>     | 0.338612226 | -1.562294029 | 0.000256333 | 0.004174669 | Down |
| A | chr1  | <i>HSP90B3P</i>  | 2.826628855 | 1.499082465  | 0.000372993 | 0.005538877 | Up   |
| A | chr19 | <i>PPP6R1</i>    | 0.530690984 | -0.914056057 | 9.41E-05    | 0.002074339 | Down |
| A | chr19 | <i>PPP5C</i>     | 0.595246105 | -0.74844182  | 0.004970227 | 0.033015968 | Down |
| A | chrX  | <i>FOXO4</i>     | 0.449862207 | -1.152444924 | 0.000195763 | 0.003443799 | Down |
| A | chr17 | <i>SSTR2</i>     | 0.279810557 | -1.837477698 | 8.69E-06    | 0.000355572 | Down |
| A | chr11 | <i>RPS3</i>      | 1.60543753  | 0.682966529  | 0.007883026 | 0.045389122 | Up   |
| A | chr7  | <i>CADPS2</i>    | 3.671050258 | 1.876192866  | 0.000126482 | 0.002524419 | Up   |
| A | chrX  | <i>HCFC1</i>     | 0.484616735 | -1.04508387  | 0.001140295 | 0.012013136 | Down |
| A | chr17 | <i>BRIP1</i>     | 2.242800969 | 1.165301598  | 0.000569287 | 0.00748576  | Up   |
| A | chr17 | <i>SMARCD2</i>   | 0.593612498 | -0.752406627 | 0.001899879 | 0.017067533 | Down |
| A | chr16 | <i>CYLD</i>      | 2.210097899 | 1.144110277  | 1.19E-05    | 0.000452471 | Up   |
| A | chr6  | <i>BCLAF1</i>    | 2.026881286 | 1.019261593  | 0.00015252  | 0.002897881 | Up   |
| A | chr19 | <i>CNOT3</i>     | 0.487788241 | -1.035673116 | 0.00411958  | 0.029176822 | Down |
| A | chr5  | <i>ACTBL2</i>    | 0.55481972  | -0.849909029 | 0.000816224 | 0.009607008 | Down |
| A | chr3  | <i>GNL3</i>      | 3.173849257 | 1.666233609  | 3.15E-08    | 5.14E-06    | Up   |
| A | chr7  | <i>CASD1</i>     | 1.630158448 | 0.705012199  | 0.007045682 | 0.041879455 | Up   |
| A | chr19 | <i>KLC3</i>      | 0.362516771 | -1.463880354 | 0.005496841 | 0.035188949 | Down |
| A | chrX  | <i>DOCK11</i>    | 2.056920171 | 1.040485804  | 1.87E-05    | 0.00062082  | Up   |
| A | chr1  | <i>TTC39A</i>    | 7.931262133 | 2.987550466  | 0.000857724 | 0.009925418 | Up   |
| A | chr3  | <i>CX3CR1</i>    | 0.109533315 | -3.190558362 | 0.000665914 | 0.008270388 | Down |
| A | chr17 | <i>VAT1</i>      | 0.515114166 | -0.957035879 | 0.000954547 | 0.010613425 | Down |
| A | chr6  | <i>MCM9</i>      | 1.929309058 | 0.948084268  | 0.004987763 | 0.033081947 | Up   |
| A | chr19 | <i>CLIP3</i>     | 0.114315776 | -3.128903577 | 0.000815202 | 0.00960517  | Down |
| A | chr10 | <i>TIMM23</i>    | 4.931242103 | 2.301951085  | 3.53E-05    | 0.001026125 | Up   |
| A | chr12 | <i>HNF1A</i>     | 0.031605263 | -4.983691391 | 0.006969591 | 0.041559651 | Down |
| A | chr9  | <i>SIPR3</i>     | 0.227951845 | -2.133199008 | 0.000145887 | 0.002815409 | Down |
| A | chr12 | <i>ANP32D</i>    | 6.804086758 | 2.766401537  | 0.001771168 | 0.016264797 | Up   |
| A | chr8  | <i>DSCC1</i>     | Inf         | Inf          | 1.37E-06    | 9.18E-05    | Up   |
| A | chr3  | <i>TNK2</i>      | 0.303471662 | -1.720366292 | 0.000150171 | 0.002857409 | Down |
| A | chrX  | <i>ELK1</i>      | 0.437113978 | -1.193918581 | 0.001401401 | 0.01383128  | Down |
| A | chr14 | <i>C14orf159</i> | 0.287973657 | -1.795991253 | 0.001724503 | 0.015989528 | Down |
| A | chr7  | <i>NFE2L3</i>    | 3.74849299  | 1.906310704  | 0.00421923  | 0.029657303 | Up   |
| A | chr17 | <i>FBF1</i>      | 0.334751603 | -1.57883713  | 0.000776607 | 0.009240699 | Down |
| A | chr9  | <i>ENG</i>       | 0.276429535 | -1.855016325 | 9.11E-05    | 0.002028384 | Down |
| A | chr13 | <i>ZIC5</i>      | 0           | #NAME?       | 1.68E-05    | 0.000578128 | Down |
| A | chrX  | <i>RLIM</i>      | 1.763329809 | 0.818302338  | 0.001163387 | 0.012177781 | Up   |
| A | chr14 | <i>SUPT16H</i>   | 1.695527479 | 0.761734166  | 0.002193164 | 0.018897192 | Up   |
| A | chr3  | <i>HLTF</i>      | 1.67358526  | 0.74294205   | 0.007414577 | 0.043400215 | Up   |
| A | chr2  | <i>ORC4</i>      | 2.222495685 | 1.152180618  | 0.000191759 | 0.003418678 | Up   |
| A | chrX  | <i>SMC1A</i>     | 1.579844791 | 0.659782831  | 0.005411226 | 0.034828761 | Up   |
| A | chr17 | <i>TP53I13</i>   | 0.180663593 | -2.468622288 | 0.001752858 | 0.016169653 | Down |
| A | chr11 | <i>ZFP91</i>     | 2.330011149 | 1.220336858  | 4.94E-05    | 0.001295503 | Up   |
| A | chr12 | <i>B4GALNT1</i>  | 0.437567972 | -1.192420951 | 2.04E-05    | 0.000667352 | Down |

|   |       |                  |             |              |             |             |      |
|---|-------|------------------|-------------|--------------|-------------|-------------|------|
| A | chr11 | <i>C11orf48</i>  | 6.461972874 | 2.691974695  | 0.002325514 | 0.019560033 | Up   |
| A | chr5  | <i>RAD50</i>     | 1.672670473 | 0.742153253  | 0.004408028 | 0.030480863 | Up   |
| A | chr8  | <i>RAD21-AS1</i> | 0.125558153 | -2.993572384 | 6.19E-08    | 8.79E-06    | Down |
| A | chr10 | <i>PPP2R2D</i>   | 2.200706635 | 1.13796684   | 0.008216009 | 0.046790386 | Up   |
| A | chrX  | <i>RBBP7</i>     | 1.659886914 | 0.731084956  | 0.002248621 | 0.019158781 | Up   |
| A | chr8  | <i>RB1CC1</i>    | 1.822929007 | 0.866258377  | 0.000499757 | 0.006830712 | Up   |
| A | chr14 | <i>C14orf166</i> | 1.929475305 | 0.948208579  | 0.000594113 | 0.007693406 | Up   |
| A | chr17 | <i>MAPK7</i>     | 0.424950491 | -1.234633325 | 0.002569477 | 0.021027823 | Down |
| A | chr7  | <i>TSPAN13</i>   | 1.780825204 | 0.832545917  | 0.00654506  | 0.039791645 | Up   |
| A | chr2  | <i>INPP1</i>     | 3.586367916 | 1.842523498  | 0.007145078 | 0.042316107 | Up   |
| A | chr14 | <i>ZC3H14</i>    | 1.581270137 | 0.661083852  | 0.006577652 | 0.039971179 | Up   |
| A | chr8  | <i>CRISPLD1</i>  | 2.106242567 | 1.074671595  | 0.007033648 | 0.041846039 | Up   |
| A | chr11 | <i>FAR1</i>      | 1.75933053  | 0.815026551  | 0.002594443 | 0.021162592 | Up   |
| A | chr14 | <i>LRR1</i>      | 5.320380869 | 2.411529527  | 0.003100155 | 0.023896732 | Up   |
| A | chr1  | <i>LMNA</i>      | 0.202966576 | -2.300685926 | 0.000924931 | 0.010404252 | Down |
| A | chr19 | <i>ZC3H4</i>     | 0.483615193 | -1.048068525 | 5.54E-05    | 0.001403862 | Down |
| A | chr9  | <i>ZER1</i>      | 0.4252158   | -1.233732888 | 0.001067998 | 0.011483181 | Down |
| A | chr17 | <i>FAM222B</i>   | 0.256378674 | -1.963651832 | 3.94E-06    | 0.000200072 | Down |
| A | chr17 | <i>RAB11FIP4</i> | 0.408547756 | -1.291423367 | 0.000121335 | 0.002455488 | Down |
| A | chr1  | <i>ACTA1</i>     | 0.185702941 | -2.428931435 | 1.42E-16    | 1.69E-13    | Down |
| A | chr11 | <i>IGF2</i>      | 0           | #NAME?       | 3.92E-05    | 0.001112997 | Down |
| A | chr3  | <i>TEX264</i>    | 0.312793154 | -1.676719158 | 4.72E-06    | 0.00022652  | Down |
| A | chr1  | <i>S100A11</i>   | 0.277099156 | -1.851525777 | 1.22E-05    | 0.000454011 | Down |
| A | chr8  | <i>ADCY8</i>     | 0.026852625 | -5.218793071 | 0.002298423 | 0.01948137  | Down |
| A | chr17 | <i>COL1A1</i>    | 0.037926315 | -4.720656985 | 0.000205521 | 0.00356878  | Down |
| A | chr12 | <i>CKAP4</i>     | 0.396425619 | -1.334877894 | 2.43E-05    | 0.000761376 | Down |
| A | chr16 | <i>MAPK3</i>     | 0.446962971 | -1.16177278  | 4.72E-05    | 0.001252313 | Down |
| A | chr4  | <i>RGS12</i>     | 0.573495593 | -0.802145695 | 0.005941339 | 0.037088616 | Down |
| A | chr15 | <i>MYEF2</i>     | 1.825491818 | 0.868285202  | 0.003438378 | 0.025755636 | Up   |
| A | chr8  | <i>MYC</i>       | 0.320491452 | -1.641642215 | 0.000198699 | 0.003476725 | Down |
| A | chr12 | <i>SLC6A12</i>   | 0           | #NAME?       | 0.005625651 | 0.035759366 | Down |
| A | chr6  | <i>EYA4</i>      | 0.065055719 | -3.942180302 | 0.000473054 | 0.006562651 | Down |
| A | chr15 | <i>FES</i>       | 0.528333478 | -0.920479265 | 0.000547172 | 0.007295269 | Down |
| A | chr1  | <i>EFHD2</i>     | 0.477513503 | -1.066386565 | 0.008943063 | 0.049526433 | Down |
| A | chr19 | <i>PRKCSH</i>    | 0.484084271 | -1.046669877 | 0.001204246 | 0.012495254 | Down |
| A | chr9  | <i>TMEM8B</i>    | 0.269496961 | -1.891659093 | 0.001654107 | 0.015613262 | Down |
| A | chr3  | <i>FYTTD1</i>    | 2.55307422  | 1.352235479  | 0.000540752 | 0.007239415 | Up   |
| A | chr3  | <i>TADA3</i>     | 0.476028604 | -1.070879828 | 0.000886313 | 0.010130511 | Down |
| A | chr9  | <i>TGFBR1</i>    | 2.499265688 | 1.321504277  | 8.06E-06    | 0.000337354 | Up   |
| A | chr19 | <i>SCAMP4</i>    | 0.252805074 | -1.983902673 | 0.000680284 | 0.008409747 | Down |
| A | chr11 | <i>TBRG1</i>     | 1.847076637 | 0.885243726  | 0.006124827 | 0.03799713  | Up   |
| A | chr6  | <i>EXOC2</i>     | 2.000864825 | 1.000623704  | 0.000256499 | 0.004174669 | Up   |
| A | chr17 | <i>WDR81</i>     | 0.359804305 | -1.474715648 | 0.001105609 | 0.011759876 | Down |
| A | chr22 | <i>KCTD17</i>    | 0.368206821 | -1.441411742 | 0.007864177 | 0.045320572 | Down |

|   |       |                 |             |              |             |             |      |
|---|-------|-----------------|-------------|--------------|-------------|-------------|------|
| A | chr2  | <i>RIF1</i>     | 2.421446666 | 1.275869227  | 8.80E-07    | 6.57E-05    | Up   |
| A | chr15 | <i>RPAP1</i>    | 0.390258136 | -1.357499387 | 3.48E-05    | 0.001015381 | Down |
| A | chr5  | <i>PJA2</i>     | 2.120394451 | 1.08433267   | 0.000459005 | 0.006416733 | Up   |
| A | chr1  | <i>FHL3</i>     | 0.446901664 | -1.161970678 | 0.008717462 | 0.04862616  | Down |
| A | chr14 | <i>DDHD1</i>    | 2.110097393 | 1.077309589  | 0.003324147 | 0.025126699 | Up   |
| A | chr6  | <i>BAG6</i>     | 0.362590373 | -1.463587474 | 0.000102815 | 0.002202807 | Down |
| A | chr19 | <i>ELANE</i>    | 0.196756308 | -2.345518207 | 1.76E-07    | 1.94E-05    | Down |
| A | chr11 | <i>FAM118B</i>  | 2.511611745 | 1.328613464  | 0.000947468 | 0.010597511 | Up   |
| A | chr12 | <i>CNOT2</i>    | 1.572397691 | 0.65296615   | 0.00674588  | 0.04057787  | Up   |
| A | chr19 | <i>CIC</i>      | 0.287668114 | -1.797522777 | 4.90E-05    | 0.001285968 | Down |
| A | chr1  | <i>SNORA14B</i> | 0.392703644 | -1.348487109 | 5.23E-05    | 0.001345405 | Down |
| A | chr6  | <i>ATF6B</i>    | 0.276624057 | -1.854001469 | 1.57E-07    | 1.79E-05    | Down |
| A | chr18 | <i>KATNAL2</i>  | 0.02983625  | -5.066789978 | 0.004413707 | 0.030498739 | Down |
| A | chr10 | <i>METTL10</i>  | 2.167165107 | 1.11580907   | 0.00485695  | 0.032526451 | Up   |
| A | chr1  | <i>LUZP1</i>    | 2.044471184 | 1.031727729  | 0.008818374 | 0.04900223  | Up   |
| A | chr2  | <i>TET3</i>     | 0.389383861 | -1.360735007 | 0.000638651 | 0.008077821 | Down |
| A | chr14 | <i>TRIP11</i>   | 1.913833248 | 0.936465134  | 0.001742068 | 0.016106334 | Up   |
| A | chr19 | <i>SSBP4</i>    | 0.279010885 | -1.84160669  | 0.000578882 | 0.007571291 | Down |
| A | chr11 | <i>FAT3</i>     | 0.050270328 | -4.314149079 | 0.001823367 | 0.016637093 | Down |
| A | chr1  | <i>SLC22A15</i> | 0.389345817 | -1.360875968 | 0.003385398 | 0.025469512 | Down |
| A | chr12 | <i>ALDH2</i>    | 0.451832437 | -1.146140249 | 3.28E-06    | 0.00017259  | Down |
| A | chr5  | <i>GALNT10</i>  | 0.467900748 | -1.09572556  | 0.001174919 | 0.012256335 | Down |
| A | chr17 | <i>UNC13D</i>   | 0.44747457  | -1.1601224   | 5.55E-06    | 0.000254631 | Down |
| A | chr7  | <i>PUS7</i>     | 2.048786181 | 1.034769427  | 0.000592576 | 0.007693406 | Up   |
| A | chr20 | <i>SYS1</i>     | 0.29980497  | -1.737903795 | 1.34E-05    | 0.000485022 | Down |
| A | chr4  | <i>ARFIP1</i>   | 2.183270689 | 1.126491011  | 0.000678443 | 0.008402012 | Up   |
| A | chr19 | <i>SPRED3</i>   | 0.132578931 | -2.915076567 | 0.000170101 | 0.003118448 | Down |
| A | chr3  | <i>NBEAL2</i>   | 0.358643064 | -1.479379364 | 0.000753456 | 0.009055469 | Down |
| A | chr1  | <i>RGS18</i>    | 3.297701618 | 1.721460867  | 0.000308256 | 0.004761727 | Up   |
| A | chr19 | <i>RAB3A</i>    | 0.255031914 | -1.971250299 | 0.001381152 | 0.013709637 | Down |
| A | chr22 | <i>TTL12</i>    | 0.245406323 | -2.026755675 | 1.09E-08    | 2.26E-06    | Down |
| A | chr14 | <i>KTN1</i>     | 2.840067898 | 1.505925421  | 1.12E-07    | 1.40E-05    | Up   |
| A | chr8  | <i>DOK2</i>     | 0.394463665 | -1.34203568  | 0.006831222 | 0.040902723 | Down |
| A | chr1  | <i>WASF2</i>    | 0.341372888 | -1.550579611 | 4.65E-05    | 0.001245137 | Down |
| A | chr19 | <i>FBXO46</i>   | 0.397958649 | -1.329309563 | 0.002020872 | 0.017847392 | Down |
| A | chr19 | <i>QTRT1</i>    | 0.263582124 | -1.923675563 | 0.000474552 | 0.006571698 | Down |
| A | chr12 | <i>ARF3</i>     | 0.40442051  | -1.30607193  | 0.000112494 | 0.002330763 | Down |
| A | chr16 | <i>WDR90</i>    | 0.419884318 | -1.251936186 | 0.001760723 | 0.01622107  | Down |
| A | chr1  | <i>SCP2</i>     | 1.763979498 | 0.818833794  | 0.004896023 | 0.032689408 | Up   |
| A | chr12 | <i>RPH3A</i>    | 0.061441512 | -4.024642462 | 0.005881146 | 0.036853862 | Down |
| A | chr1  | <i>ZNF644</i>   | 2.160528596 | 1.111384326  | 1.13E-05    | 0.000434355 | Up   |
| A | chr12 | <i>TUBA1A</i>   | 0.578480469 | -0.789659845 | 0.002065129 | 0.018159879 | Down |
| A | chr12 | <i>TUBA1B</i>   | 0.514976269 | -0.957422144 | 4.37E-05    | 0.001191841 | Down |
| A | chr10 | <i>JMJD1C</i>   | 1.546142632 | 0.628673414  | 0.008290831 | 0.047036732 | Up   |

|   |       |                 |             |              |             |             |      |
|---|-------|-----------------|-------------|--------------|-------------|-------------|------|
| A | chr11 | <i>KIF18A</i>   | 1.961307292 | 0.97181559   | 0.006442193 | 0.039276013 | Up   |
| A | chr5  | <i>DCP2</i>     | 1.873144795 | 0.905462425  | 0.001773693 | 0.016264797 | Up   |
| A | chr2  | <i>SNORA70B</i> | 0.243490678 | -2.038061554 | 0.002743712 | 0.021930886 | Down |
| A | chr19 | <i>GMIP</i>     | 0.43470892  | -1.201878397 | 0.007602749 | 0.044220639 | Down |
| A | chr19 | <i>ZNF121</i>   | 3.46016229  | 1.790839705  | 0.001269864 | 0.01299023  | Up   |
| A | chr9  | <i>TEK</i>      | 1.987918806 | 0.991258833  | 0.008354805 | 0.047261686 | Up   |
| A | chr10 | <i>TET1</i>     | 3.450114653 | 1.786644306  | 0.005350448 | 0.034573961 | Up   |
| A | chr22 | <i>C22orf25</i> | 0.290139918 | -1.785179296 | 0.008087822 | 0.046302779 | Down |
| A | chr22 | <i>C22orf28</i> | 1.858184147 | 0.893893481  | 0.000473106 | 0.006562651 | Up   |
| A | chr10 | <i>LDB1</i>     | 0.500571352 | -0.998352367 | 1.77E-05    | 0.000602534 | Down |
| A | chr11 | <i>GANAB</i>    | 0.636010366 | -0.652877815 | 0.005543447 | 0.035400495 | Down |
| A | chr9  | <i>JAK2</i>     | 1.741477276 | 0.800311647  | 0.001873514 | 0.016923859 | Up   |
| A | chr1  | <i>SNORA16A</i> | 0.143679917 | -2.799069678 | 9.48E-09    | 2.06E-06    | Down |
| A | chr19 | <i>CKM</i>      | 0.014918125 | -6.066789978 | 1.59E-05    | 0.000554107 | Down |
| A | chr10 | <i>MAPK8</i>    | 1.863396017 | 0.897934315  | 0.001679533 | 0.015737931 | Up   |
| A | chr14 | <i>PELI2</i>    | 0.350737169 | -1.51153777  | 0.000215117 | 0.003675285 | Down |
| A | chr6  | <i>UFL1</i>     | 2.207383463 | 1.142337274  | 0.00068455  | 0.008439857 | Up   |
| A | chr1  | <i>GATAD2B</i>  | 0.541641661 | -0.884589386 | 0.003225979 | 0.024599168 | Down |
| A | chr20 | <i>E2F1</i>     | 0.304875208 | -1.713709259 | 0.000446785 | 0.006304742 | Down |
| A | chr15 | <i>GLCE</i>     | 1.863973166 | 0.898381091  | 0.002743966 | 0.021930886 | Up   |
| A | chr9  | <i>LRRC8A</i>   | 0.409376489 | -1.288499847 | 3.98E-06    | 0.000201163 | Down |
| A | chr7  | <i>PHTF2</i>    | 2.123526462 | 1.086462087  | 0.000183008 | 0.003290367 | Up   |
| A | chr17 | <i>TAOK1</i>    | 1.55606408  | 0.637901473  | 0.00810694  | 0.046351244 | Up   |
| A | chr16 | <i>NAE1</i>     | 3.694422235 | 1.885348761  | 2.05E-06    | 0.000120613 | Up   |
| A | chr17 | <i>KIF1C</i>    | 0.479304311 | -1.06098618  | 0.003108753 | 0.02394015  | Down |
| A | chr11 | <i>PYGM</i>     | 0.486278954 | -1.040143941 | 0.000952536 | 0.010611686 | Down |
| A | chr22 | <i>C22orf32</i> | 0.508599316 | -0.975398573 | 0.004430574 | 0.030566748 | Down |
| A | chrX  | <i>GPRASP1</i>  | 4.247600871 | 2.086648208  | 3.80E-05    | 0.001089064 | Up   |
| A | chr9  | <i>C9orf89</i>  | 0.490604158 | -1.027368635 | 0.006713219 | 0.040455978 | Down |
| A | chr7  | <i>FBXL18</i>   | 0.261418633 | -1.935566122 | 0.000783041 | 0.0093001   | Down |
| A | chr5  | <i>NDST1</i>    | 0.425052911 | -1.234285655 | 6.19E-06    | 0.0002739   | Down |
| A | chr4  | <i>BBS12</i>    | 3.725938078 | 1.897603698  | 0.00760799  | 0.044220639 | Up   |
| A | chr5  | <i>MEGF10</i>   | 0.046081134 | -4.439679961 | 0.002225902 | 0.01911493  | Down |
| A | chr1  | <i>PTGFRN</i>   | 0.130619287 | -2.936560152 | 0.004468046 | 0.030776468 | Down |
| A | chr4  | <i>POLR2B</i>   | 1.6507897   | 0.723156342  | 0.005160243 | 0.033695171 | Up   |
| A | chr11 | <i>ZNF202</i>   | 6.204060702 | 2.633212802  | 0.003376969 | 0.025434627 | Up   |
| A | chr11 | <i>RPS6KA4</i>  | 0.365218871 | -1.453166783 | 0.000244677 | 0.004053012 | Down |
| A | chr11 | <i>SPI1</i>     | 0.427874193 | -1.224741429 | 2.15E-05    | 0.000691501 | Down |
| A | chr17 | <i>ARHGAP23</i> | 0.289588679 | -1.787922894 | 1.25E-05    | 0.000462595 | Down |
| A | chr17 | <i>ARHGAP27</i> | 0.320944253 | -1.639605368 | 9.36E-07    | 6.90E-05    | Down |
| A | chr5  | <i>HNRNPH1</i>  | 2.061439998 | 1.04365247   | 1.22E-05    | 0.000454011 | Up   |
| A | chr17 | <i>FLCN</i>     | 0.485136162 | -1.043538372 | 0.000576148 | 0.007558248 | Down |
| A | chr5  | <i>SMIM3</i>    | 0.309920006 | -1.690032209 | 0.00513855  | 0.033654535 | Down |
| A | chr4  | <i>NDST3</i>    | 0.083742097 | -3.577903138 | 0.008024002 | 0.045977741 | Down |

|   |       |                |             |              |             |             |      |
|---|-------|----------------|-------------|--------------|-------------|-------------|------|
| A | chr10 | <i>CUL2</i>    | 1.971800922 | 0.979513901  | 0.000654724 | 0.008196179 | Up   |
| A | chr12 | <i>ZNF384</i>  | 0.607688581 | -0.718595911 | 0.004587629 | 0.031352002 | Down |
| A | chr18 | <i>THOC1</i>   | 2.404586792 | 1.265789     | 0.000338868 | 0.005113572 | Up   |
| A | chr2  | <i>ACTG2</i>   | 0.652740311 | -0.615418957 | 0.007617453 | 0.044250385 | Down |
| A | chr1  | <i>GGPS1</i>   | 2.070017447 | 1.049642927  | 0.005706984 | 0.036109189 | Up   |
| A | chr13 | <i>SACS</i>    | 2.179975541 | 1.124311948  | 6.24E-06    | 0.000274136 | Up   |
| A | chr16 | <i>YPEL3</i>   | 0.359917603 | -1.474261431 | 1.45E-06    | 9.53E-05    | Down |
| A | chr12 | <i>ELK3</i>    | 0.462255872 | -1.11323645  | 1.46E-05    | 0.000519262 | Down |
| A | chr8  | <i>CSPP1</i>   | 1.891735436 | 0.919710338  | 0.006165455 | 0.038213527 | Up   |
| A | chr19 | <i>ZNF600</i>  | Inf         | Inf          | 0.007764615 | 0.044865657 | Up   |
| A | chr16 | <i>PGP</i>     | 0.448351032 | -1.157299378 | 0.001714669 | 0.015948418 | Down |
| A | chr19 | <i>ZNF606</i>  | 2.949893885 | 1.560663058  | 2.80E-06    | 0.000152424 | Up   |
| A | chr16 | <i>FBXO31</i>  | 0.295619425 | -1.758187025 | 1.24E-05    | 0.000459279 | Down |
| A | chr11 | <i>FAM168A</i> | 0.315194958 | -1.665683636 | 6.14E-06    | 0.000272505 | Down |
| A | chr11 | <i>ZNF214</i>  | 4.021765541 | 2.007828978  | 0.000682377 | 0.008426739 | Up   |
| A | chr20 | <i>NCOR1P1</i> | 0.294665807 | -1.762848433 | 0.000535255 | 0.007180552 | Down |
| A | chr12 | <i>ANKRD52</i> | 0.337400401 | -1.567466407 | 0.001028483 | 0.011234127 | Down |
| A | chr10 | <i>DPYSL4</i>  | 0.088162123 | -3.503697217 | 3.40E-06    | 0.000178187 | Down |
| A | chr9  | <i>PPP2R4</i>  | 0.550507525 | -0.86116581  | 0.000642499 | 0.008102939 | Down |
| A | chr12 | <i>CEP290</i>  | 2.107834679 | 1.075761718  | 0.000949634 | 0.010601638 | Up   |
| A | chrX  | <i>STAG2</i>   | 1.957627921 | 0.969106583  | 0.000325034 | 0.004956387 | Up   |
| A | chr12 | <i>SPPL3</i>   | 0.531223224 | -0.912609876 | 0.000665662 | 0.008270388 | Down |
| A | chr6  | <i>COL9A1</i>  | 0           | #NAME?       | 0.001917005 | 0.017162326 | Down |
| A | chr16 | <i>ALDOA</i>   | 0.631937592 | -0.662146005 | 0.004806386 | 0.03232239  | Down |
| A | chr6  | <i>GMDS</i>    | 2.00271974  | 1.001960545  | 0.005255899 | 0.034165962 | Up   |
| A | chrX  | <i>POLA1</i>   | 2.070165606 | 1.049746183  | 2.80E-05    | 0.000858462 | Up   |
| A | chr3  | <i>ATP2C1</i>  | 1.924151149 | 0.944222133  | 0.000430748 | 0.006151584 | Up   |
| A | chr9  | <i>HINT2</i>   | 0.27425785  | -1.866395182 | 0.00494449  | 0.03292879  | Down |
| A | chr14 | <i>WDHD1</i>   | 1.697736615 | 0.763612658  | 0.005392832 | 0.034744636 | Up   |
| A | chr20 | <i>CPXM1</i>   | 4.360459882 | 2.124480299  | 0.003511026 | 0.026064663 | Up   |
| A | chr3  | <i>ADAMTS9</i> | 0.077244144 | -3.694430633 | 0.000428048 | 0.006119733 | Down |
| A | chr9  | <i>TOPORS</i>  | 1.950051891 | 0.963512514  | 0.000462616 | 0.006458318 | Up   |
| A | chr9  | <i>TAF1L</i>   | 2.322455382 | 1.21565088   | 3.93E-05    | 0.001112997 | Up   |
| A | chr20 | <i>TSHZ2</i>   | 0.091783194 | -3.445626171 | 1.58E-07    | 1.79E-05    | Down |
| A | chr9  | <i>OMD</i>     | 4.749204611 | 2.247685914  | 0.002926739 | 0.022953044 | Up   |
| A | chr16 | <i>THOC6</i>   | 0.417638973 | -1.259671748 | 0.00373969  | 0.027224858 | Down |
| A | chr1  | <i>USP1</i>    | 1.988841711 | 0.991928459  | 0.000302637 | 0.004719625 | Up   |
| A | chr1  | <i>MCL1</i>    | 1.698509391 | 0.764269195  | 0.004138155 | 0.029292483 | Up   |
| A | chr1  | <i>ZNF684</i>  | 11.64428807 | 3.54155053   | 0.007503175 | 0.043761817 | Up   |
| A | chr19 | <i>ERCC2</i>   | 0.555705689 | -0.847607086 | 0.004669057 | 0.031676302 | Down |
| A | chr3  | <i>LRRC33</i>  | 0.544070817 | -0.878133647 | 0.000558714 | 0.007426567 | Down |
| A | chr1  | <i>ZNF687</i>  | 0.40027182  | -1.320948045 | 1.06E-06    | 7.56E-05    | Down |
| A | chr10 | <i>TCF7L2</i>  | 0.316619878 | -1.659176262 | 0.005149042 | 0.033685842 | Down |
| A | chr7  | <i>SNX10</i>   | 2.274194833 | 1.185355857  | 0.000565909 | 0.007476527 | Up   |

|   |       |                 |             |              |             |             |      |
|---|-------|-----------------|-------------|--------------|-------------|-------------|------|
| A | chr2  | <i>CNNM3</i>    | 0.322193401 | -1.634001149 | 9.04E-06    | 0.000364153 | Down |
| A | chr7  | <i>SNX13</i>    | 2.245500012 | 1.16703673   | 2.35E-05    | 0.000739468 | Up   |
| A | chr14 | <i>RPPH1</i>    | 0.226596603 | -2.141801864 | 4.41E-05    | 0.001197455 | Down |
| A | chr5  | <i>MOCS2</i>    | 3.214562341 | 1.68462233   | 0.001634386 | 0.0154816   | Up   |
| A | chr19 | <i>ZNF160</i>   | 3.259819698 | 1.70479217   | 0.001687833 | 0.015781719 | Up   |
| A | chr19 | <i>KHSRP</i>    | 0.315757419 | -1.663111463 | 0.000155885 | 0.002927713 | Down |
| A | chr12 | <i>AMN1</i>     | 0.276832917 | -1.852912598 | 0.007315354 | 0.043012305 | Down |
| A | chr19 | <i>NCLN</i>     | 0.378999635 | -1.399731638 | 0.000120466 | 0.002445474 | Down |
| A | chr12 | <i>SHMT2</i>    | 0.467274357 | -1.097658227 | 0.000123745 | 0.002488814 | Down |
| A | chr6  | <i>KIAA1009</i> | 3.226935069 | 1.690164549  | 0.000153099 | 0.002897896 | Up   |
| A | chr2  | <i>SLC4A1AP</i> | 2.260371783 | 1.176560085  | 0.00129747  | 0.013146525 | Up   |
| A | chr3  | <i>SCAP</i>     | 0.505027322 | -0.985566654 | 9.19E-05    | 0.002039072 | Down |
| A | chr4  | <i>SLC25A4</i>  | 1.741249211 | 0.800122699  | 0.007683625 | 0.044535681 | Up   |
| A | chr15 | <i>IMP3</i>     | 0.34975771  | -1.515572236 | 0.000143161 | 0.002784927 | Down |
| A | chr1  | <i>NASP</i>     | 2.908533401 | 1.540291872  | 0.003266987 | 0.024858002 | Up   |
| A | chrX  | <i>PGRMC1</i>   | 1.850750686 | 0.888110563  | 0.004618494 | 0.031481446 | Up   |
| A | chr19 | <i>ZNF625</i>   | 2.609908189 | 1.383999057  | 1.23E-06    | 8.56E-05    | Up   |
| A | chr4  | <i>WHSC1</i>    | 1.566471164 | 0.647518212  | 0.008800708 | 0.048924892 | Up   |
| A | chr22 | <i>MN1</i>      | 0.21961866  | -2.186927456 | 2.14E-05    | 0.000691245 | Down |
| A | chr19 | <i>ZNF628</i>   | 0.244519395 | -2.031979192 | 0.000283015 | 0.004499626 | Down |
| A | chr16 | <i>SLC38A7</i>  | 0.266925173 | -1.905492726 | 8.47E-05    | 0.001935778 | Down |
| A | chr7  | <i>REPIN1</i>   | 0.399723633 | -1.322925223 | 0.000215444 | 0.003676064 | Down |
| A | chr1  | <i>WDTC1</i>    | 0.361381686 | -1.4684047   | 0.000173118 | 0.003164859 | Down |
| A | chr15 | <i>TLE3</i>     | 0.328699791 | -1.605157556 | 1.18E-07    | 1.47E-05    | Down |
| A | chr5  | <i>PCYOX1L</i>  | 0.358675204 | -1.479250083 | 0.000548277 | 0.007295269 | Down |
| A | chr3  | <i>CLCN2</i>    | 0.360433938 | -1.472193234 | 0.000900291 | 0.010208926 | Down |
| A | chr14 | <i>AP1G2</i>    | 0.530698034 | -0.91403689  | 0.002184382 | 0.018870109 | Down |
| A | chr20 | <i>ZNF335</i>   | 0.582884293 | -0.778718568 | 0.008413337 | 0.047462614 | Down |
| A | chr10 | <i>KIF11</i>    | 1.872363195 | 0.904860311  | 0.00042542  | 0.006088823 | Up   |
| A | chr7  | <i>CCDC132</i>  | 1.94225557  | 0.957733049  | 0.001368669 | 0.013644476 | Up   |
| A | chr1  | <i>AHDC1</i>    | 0.220385848 | -2.181896513 | 0.000459146 | 0.006416733 | Down |
| A | chr3  | <i>SNORA62</i>  | 0.238870724 | -2.065698049 | 0.000742159 | 0.008954753 | Down |
| A | chr3  | <i>SNORA63</i>  | 0.37450976  | -1.416924779 | 7.05E-05    | 0.001704356 | Down |
| A | chr2  | <i>DNAH6</i>    | 0.036864907 | -4.761608056 | 0.000480936 | 0.006633814 | Down |
| A | chr2  | <i>DNAH7</i>    | 0.094815788 | -3.39872889  | 8.67E-06    | 0.000355572 | Down |
| A | chrX  | <i>CASK</i>     | 1.783851425 | 0.83499546   | 0.006732097 | 0.040532317 | Up   |
| A | chr6  | <i>MLLT4</i>    | 3.341565362 | 1.740524094  | 1.86E-07    | 2.02E-05    | Up   |
| A | chr12 | <i>BLOC1S1</i>  | 2.247301818 | 1.168193895  | 0.00824449  | 0.046870787 | Up   |
| A | chr11 | <i>IL10RA</i>   | 0.149363611 | -2.743099385 | 0.008741031 | 0.048696831 | Down |
| A | chr3  | <i>MCCC1</i>    | 2.598034221 | 1.377420434  | 0.007603357 | 0.044220639 | Up   |
| A | chr1  | <i>PTBP2</i>    | 2.298457578 | 1.200666039  | 1.71E-05    | 0.00058736  | Up   |
| A | chr17 | <i>MIF4GD</i>   | 0.229868762 | -2.121117672 | 5.58E-07    | 4.61E-05    | Down |
| A | chrX  | <i>HTATSF1</i>  | 2.000698547 | 1.000503807  | 0.00273151  | 0.021914196 | Up   |
| A | chrX  | <i>ARHGGEF6</i> | 1.601068483 | 0.679035018  | 0.006660333 | 0.040262599 | Up   |

|   |       |         |             |              |             |             |      |
|---|-------|---------|-------------|--------------|-------------|-------------|------|
| A | chr5  | LARS    | 1.83208414  | 0.873485762  | 0.003436924 | 0.025755636 | Up   |
| A | chr16 | PLK1    | 0.259128393 | -1.948260995 | 2.18E-08    | 3.96E-06    | Down |
| A | chr1  | MEF2D   | 0.26399848  | -1.921398469 | 7.31E-08    | 1.00E-05    | Down |
| A | chr17 | EVPL    | 0.211414762 | -2.241851978 | 0.002315691 | 0.019526298 | Down |
| A | chr20 | TRPC4AP | 0.489176855 | -1.03157195  | 0.000117736 | 0.002412724 | Down |
| A | chr10 | TRIM8   | 0.37924934  | -1.398781426 | 7.22E-07    | 5.56E-05    | Down |
| A | chr18 | MBP     | 0.449291059 | -1.154277742 | 0.008119594 | 0.046403264 | Down |
| A | chr18 | CTIF    | 0.297183549 | -1.750573841 | 0.00177159  | 0.016264797 | Down |
| A | chrY  | ZFY     | 2.464365209 | 1.301216074  | 0.000116475 | 0.002394247 | Up   |
| A | chr16 | CLUAP1  | 2.069690152 | 1.049414802  | 0.00255198  | 0.020923991 | Up   |
| A | chr5  | MSH3    | 3.085010673 | 1.625275481  | 9.01E-06    | 0.000364153 | Up   |
| A | chrX  | MID1P1  | 0.516710117 | -0.952572962 | 0.00872462  | 0.04862616  | Down |
| A | chr7  | CHST12  | 0.335416085 | -1.57597622  | 0.000254651 | 0.004165362 | Down |
| A | chr19 | ZNF180  | 2.746901    | 1.457804916  | 0.000364884 | 0.005443242 | Up   |
| A | chr10 | ANXA11  | 0.474554507 | -1.075354293 | 0.000126305 | 0.002524419 | Down |
| A | chr15 | FANCI   | 2.519723742 | 1.333265568  | 0.000672194 | 0.00834045  | Up   |
| A | chr22 | FBXW4P1 | 0.264244529 | -1.920054494 | 1.94E-05    | 0.000640863 | Down |
| A | chr11 | EML3    | 0.501934932 | -0.994427741 | 0.000403244 | 0.00585305  | Down |
| A | chr3  | SNORA7B | 0.313735865 | -1.672377633 | 1.80E-05    | 0.00060904  | Down |
| A | chr17 | PELP1   | 0.373827756 | -1.419554405 | 1.54E-05    | 0.000542205 | Down |
| A | chr8  | ATAD2   | 1.995978454 | 0.997096148  | 8.68E-05    | 0.001966236 | Up   |
| A | chr1  | KIF21B  | 0.445843384 | -1.165391087 | 0.007057104 | 0.041909182 | Down |
| A | chr6  | ABCC10  | 0.309993154 | -1.689691741 | 0.000154325 | 0.002915199 | Down |
| A | chr3  | ARMC8   | 1.705192221 | 0.769934379  | 0.004484052 | 0.030805434 | Up   |
| A | chr6  | TULP4   | 0.227510497 | -2.135994984 | 3.18E-05    | 0.000938677 | Down |
| A | chr5  | FAM193B | 0.553075333 | -0.854452096 | 0.003652122 | 0.026717553 | Down |
| A | chr1  | ZBTB40  | 0.463986082 | -1.107846566 | 0.002939984 | 0.022979411 | Down |
| A | chr1  | ZBTB41  | 2.260639323 | 1.176730833  | 9.94E-05    | 0.002148445 | Up   |
| A | chr4  | TIGD2   | 2.25328774  | 1.172031554  | 0.002063644 | 0.018159879 | Up   |
| A | chr11 | CD3E    | 0           | #NAME?       | 0.001917005 | 0.017162326 | Down |
| A | chr14 | IRF2BPL | 0.401989497 | -1.314770287 | 0.001356946 | 0.013565889 | Down |
| A | chr1  | LGALS8  | 3.237177982 | 1.694736688  | 0.007089436 | 0.04208204  | Up   |
| A | chr1  | NAV1    | 0.317618991 | -1.654630918 | 0.001356872 | 0.013565889 | Down |
| A | chr22 | SBF1    | 0.448403507 | -1.157130534 | 6.02E-05    | 0.001506362 | Down |
| A | chr3  | SNORA81 | 0.092478394 | -3.434739846 | 1.22E-40    | 1.59E-36    | Down |
| A | chr4  | HAUS3   | 2.139324763 | 1.097155509  | 0.000307193 | 0.004761727 | Up   |
| A | chr22 | KREMEN1 | 0.386903079 | -1.369955885 | 0.002644758 | 0.021442256 | Down |
| A | chr17 | EIF1    | 0.433821767 | -1.204825654 | 8.97E-05    | 0.002003835 | Down |
| A | chr6  | TCP1    | 2.219703466 | 1.150366957  | 0.008448252 | 0.047593886 | Up   |
| A | chr5  | GDNF    | 0.068458322 | -3.868630267 | 0.005397552 | 0.03475789  | Down |
| A | chr1  | SEPN1   | 0.443216842 | -1.17391539  | 0.001542589 | 0.014870191 | Down |
| A | chr12 | ZNF385A | 0.249229558 | -2.004452916 | 0.004232628 | 0.029719468 | Down |
| A | chr11 | SNORD97 | 0.486933407 | -1.038203613 | 0.003812653 | 0.027540983 | Down |
| A | chr11 | RHOG    | 0.307162486 | -1.702926067 | 4.86E-10    | 1.71E-07    | Down |

|   |       |                     |             |              |             |             |      |
|---|-------|---------------------|-------------|--------------|-------------|-------------|------|
| A | chr17 | <i>UNK</i>          | 0.470428839 | -1.08795159  | 0.000281499 | 0.004480981 | Down |
| A | chr2  | <i>DARS</i>         | 2.021372306 | 1.015335068  | 0.007997901 | 0.045888613 | Up   |
| A | chr19 | <i>MED16</i>        | 0.25019247  | -1.998889727 | 2.64E-06    | 0.000146676 | Down |
| A | chr6  | <i>RNGTT</i>        | 1.805188504 | 0.852149496  | 0.003805426 | 0.02751309  | Up   |
| A | chr22 | <i>SMCR7L</i>       | 0.55635405  | -0.845924825 | 0.003597174 | 0.026467821 | Down |
| A | chr9  | <i>ANXA1</i>        | 2.570265885 | 1.361917609  | 0.003430235 | 0.025755636 | Up   |
| A | chr1  | <i>CACNA1E</i>      | 0.387580573 | -1.367431835 | 0.003378813 | 0.025434627 | Down |
| A | chr21 | <i>RUNX1</i>        | 0.562112357 | -0.831069564 | 0.005076644 | 0.033497557 | Down |
| A | chr10 | <i>CPEB3</i>        | 0.189576891 | -2.399144983 | 0.00042012  | 0.006026188 | Down |
| A | chr19 | <i>MEGF8</i>        | 0.345762164 | -1.532148087 | 0.002462821 | 0.020385037 | Down |
| A | chr14 | <i>CALM1</i>        | 1.93798307  | 0.954555968  | 0.001854872 | 0.016831651 | Up   |
| A | chrX  | <i>MAGEH1</i>       | 5.982586898 | 2.580769447  | 0.006346574 | 0.038966056 | Up   |
| A | chr11 | <i>MUC6</i>         | 0.028444736 | -5.135694484 | 0.003648209 | 0.026717553 | Down |
| A | chr18 | <i>ME2</i>          | 2.295471799 | 1.198790708  | 0.000517088 | 0.006979889 | Up   |
| A | chr19 | <i>ZNF667</i>       | 3.835018691 | 1.939233609  | 0.000454006 | 0.006379821 | Up   |
| A | chr8  | <i>PRKDC</i>        | 2.037414196 | 1.026739302  | 0.00011963  | 0.002432288 | Up   |
| A | chr7  | <i>FO XK1</i>       | 0.376205514 | -1.410407101 | 0.001149596 | 0.012072143 | Down |
| A | chr20 | <i>SLCO4A1</i>      | 0.251898352 | -1.989086409 | 0.000323866 | 0.004950149 | Down |
| A | chr19 | <i>MED25</i>        | 0.208014813 | -2.265241828 | 1.69E-11    | 9.57E-09    | Down |
| A | chr12 | <i>LMBR1L</i>       | 0.471856307 | -1.083580508 | 0.002634407 | 0.02139963  | Down |
| A | chr22 | <i>FOXRED2</i>      | 0.485783314 | -1.041615157 | 0.002551079 | 0.020923991 | Down |
| A | chr2  | <i>SDC1</i>         | 0.442864955 | -1.175061258 | 0.003504186 | 0.026064663 | Down |
| A | chr12 | <i>NDUFA4L2</i>     | 4.869714784 | 2.283837277  | 0.000246799 | 0.00407365  | Up   |
| A | chr2  | <i>LOC100129726</i> | 0           | #NAME?       | 0.001947229 | 0.01736146  | Down |
| A | chr4  | <i>FBXL5</i>        | 1.93487698  | 0.952241843  | 0.002596576 | 0.021162592 | Up   |
| A | chr1  | <i>RERE</i>         | 0.489350347 | -1.031060373 | 0.003897175 | 0.027943283 | Down |
| A | chr2  | <i>SESTD1</i>       | 2.131514771 | 1.091879053  | 0.001437201 | 0.014057222 | Up   |
| A | chr12 | <i>FGD4</i>         | 2.373635136 | 1.247098187  | 0.000280637 | 0.004478215 | Up   |
| A | chr10 | <i>KIF5B</i>        | 2.396960598 | 1.261206194  | 3.72E-06    | 0.000191221 | Up   |
| A | chr11 | <i>SF1</i>          | 0.407616225 | -1.294716616 | 0.000154872 | 0.002921299 | Down |
| A | chr7  | <i>POM121</i>       | 0.10181285  | -3.296008441 | 1.06E-05    | 0.000410683 | Down |
| A | chr3  | <i>SNORA6</i>       | 0.22491662  | -2.152537825 | 3.47E-07    | 3.25E-05    | Down |
| A | chr1  | <i>CMPK1</i>        | 1.694619165 | 0.760961091  | 0.007964965 | 0.04577236  | Up   |
| A | chr5  | <i>SNX2</i>         | 1.691486784 | 0.758291905  | 0.006308559 | 0.038805664 | Up   |
| A | chr20 | <i>NDUFAF5</i>      | 2.788512762 | 1.479495874  | 0.001892757 | 0.017050487 | Up   |
| A | chr1  | <i>ZBTB7B</i>       | 0.417819486 | -1.259048316 | 0.00321331  | 0.024542617 | Down |
| A | chr7  | <i>7-Sep</i>        | 2.377102584 | 1.249204164  | 0.001823924 | 0.016637093 | Up   |
| A | chr16 | <i>COTL1</i>        | 0.370176164 | -1.433716094 | 0.000160215 | 0.00299182  | Down |
| A | chr11 | <i>SYVN1</i>        | 0.269534833 | -1.891456367 | 1.16E-05    | 0.000441811 | Down |
| A | chr17 | <i>MED24</i>        | 0.470351481 | -1.088188849 | 1.90E-05    | 0.000629397 | Down |
| A | chr2  | <i>IMMT</i>         | 1.828489929 | 0.870652681  | 0.001052096 | 0.011397025 | Up   |
| A | chr15 | <i>DPP8</i>         | 1.573163093 | 0.653668245  | 0.009050338 | 0.049972108 | Up   |
| A | chrX  | <i>ARMCX2</i>       | 2.306157159 | 1.205490832  | 0.000257284 | 0.004182223 | Up   |
| A | chr19 | <i>OAZ1</i>         | 0.493436113 | -1.01906479  | 1.22E-05    | 0.000454011 | Down |

|   |       |                 |             |              |             |             |      |
|---|-------|-----------------|-------------|--------------|-------------|-------------|------|
| A | chr19 | <i>LYL1</i>     | 0.414228453 | -1.27150144  | 0.000286493 | 0.004538342 | Down |
| A | chr1  | <i>AGTRAP</i>   | 0.175222462 | -2.512740367 | 0.000971384 | 0.010745315 | Down |
| A | chr15 | <i>NTRK3</i>    | 0           | #NAME?       | 5.04E-05    | 0.00130896  | Down |
| A | chr2  | <i>RANBP2</i>   | 2.127302519 | 1.089025211  | 1.28E-05    | 0.000468758 | Up   |
| A | chr22 | <i>ZC3H7B</i>   | 0.596108296 | -0.746353642 | 0.006768901 | 0.040632818 | Down |
| A | chr8  | <i>EBAG9</i>    | 2.803470381 | 1.487213828  | 0.000305858 | 0.004752811 | Up   |
| A | chr12 | <i>ZFC3H1</i>   | 1.714399046 | 0.777702953  | 0.00165593  | 0.015613262 | Up   |
| A | chr19 | <i>BCKDHA</i>   | 0.540857408 | -0.886679804 | 0.003115727 | 0.023979706 | Down |
| A | chr11 | <i>SORL1</i>    | 0.508533844 | -0.975584303 | 0.000179992 | 0.003254069 | Down |
| A | chr8  | <i>PLAG1</i>    | 2.080441902 | 1.056890001  | 0.003557781 | 0.026266804 | Up   |
| A | chr7  | <i>RALA</i>     | 2.893249625 | 1.532690802  | 0.00037929  | 0.005582588 | Up   |
| A | chr10 | <i>ZMIZ1</i>    | 0.295672684 | -1.757927131 | 0.001252983 | 0.012908597 | Down |
| A | chr16 | <i>ZNF646</i>   | 0.619225754 | -0.69146262  | 0.008305167 | 0.047092681 | Down |
| A | chr19 | <i>ZNF93</i>    | Inf         | Inf          | 0.002369607 | 0.019827235 | Up   |
| A | chr6  | <i>AMD1</i>     | 1.553379754 | 0.635410568  | 0.009042071 | 0.049949419 | Up   |
| A | chr7  | <i>ORAI2</i>    | 0.322864093 | -1.631001093 | 1.51E-05    | 0.00053551  | Down |
| A | chr14 | <i>PARP2</i>    | 1.940071329 | 0.956109696  | 0.001358329 | 0.013565889 | Up   |
| A | chr5  | <i>SLC25A46</i> | 1.830271871 | 0.872057964  | 0.004425249 | 0.03054615  | Up   |
| A | chr5  | <i>ERBB2IP</i>  | 1.742694919 | 0.801320029  | 0.000865973 | 0.009989112 | Up   |
| A | chr17 | <i>TRAF4</i>    | 0.482564173 | -1.051207286 | 0.008363939 | 0.047261686 | Down |
| A | chr1  | <i>LEPROT</i>   | 0.485713093 | -1.041823717 | 0.007731362 | 0.044693298 | Down |
| A | chr8  | <i>CSMD1</i>    | 0.02983625  | -5.066789978 | 0.006361858 | 0.039018613 | Down |
| A | chr15 | <i>RPUSD2</i>   | 0.419189673 | -1.254324919 | 0.001916276 | 0.017162326 | Down |
| A | chrX  | <i>KDM6A</i>    | 2.121241049 | 1.084908572  | 2.20E-05    | 0.000706242 | Up   |
| A | chr11 | <i>PRDM11</i>   | 0.451047906 | -1.148647425 | 0.000617983 | 0.007900616 | Down |
| A | chr2  | <i>PAPOLG</i>   | 1.967725767 | 0.976529173  | 0.000458551 | 0.006416733 | Up   |
| A | chr17 | <i>MED31</i>    | Inf         | Inf          | 4.96E-06    | 0.000235448 | Up   |
| A | chr11 | <i>TEAD1</i>    | 0.033496839 | -4.899831232 | 3.25E-06    | 0.000171605 | Down |
| A | chr12 | <i>TPCN1</i>    | 0.354497424 | -1.496152952 | 0.000260622 | 0.004220716 | Down |
| A | chr20 | <i>PSMF1</i>    | 0.503020728 | -0.991310244 | 0.002011642 | 0.017814089 | Down |
| A | chr17 | <i>FAM195B</i>  | 0.358768893 | -1.478873289 | 0.003178095 | 0.024330603 | Down |
| A | chr17 | <i>RHBDF2</i>   | 0.192868892 | -2.37430763  | 1.60E-06    | 0.000101791 | Down |
| A | chr19 | <i>TECR</i>     | 0.563554453 | -0.827373078 | 0.003415371 | 0.025680209 | Down |
| A | chr1  | <i>VANGL2</i>   | 0.322421932 | -1.632978213 | 2.49E-05    | 0.000774222 | Down |
| A | chr14 | <i>SRSF5</i>    | 1.704614098 | 0.769445169  | 0.001132983 | 0.011965069 | Up   |
| A | chr11 | <i>CD81</i>     | 0.576586329 | -0.794391463 | 0.005345448 | 0.034563724 | Down |
| A | chr11 | <i>CD82</i>     | 0.236737678 | -2.078638759 | 5.93E-06    | 0.000266834 | Down |
| A | chr1  | <i>KIF26B</i>   | 0.114539456 | -3.126083439 | 0.005689941 | 0.036062607 | Down |
| A | chr8  | <i>SHARPIN</i>  | 0.412197304 | -1.278593026 | 0.007491823 | 0.04371514  | Down |
| A | chr17 | <i>KIAA0195</i> | 0.258817052 | -1.949995422 | 2.24E-08    | 4.00E-06    | Down |
| A | chr9  | <i>RPL12</i>    | 2.000681823 | 1.000491748  | 0.004465547 | 0.030775491 | Up   |
| A | chrX  | <i>ZFX</i>      | 1.992012269 | 0.994226533  | 0.000100837 | 0.002168416 | Up   |
| A | chr7  | <i>TMEM106B</i> | 2.129262321 | 1.090353698  | 0.002296061 | 0.019473999 | Up   |
| A | chrX  | <i>DDX3X</i>    | 2.192393514 | 1.132506772  | 2.11E-06    | 0.00012307  | Up   |

|   |       |                  |             |              |             |             |      |
|---|-------|------------------|-------------|--------------|-------------|-------------|------|
| A | chr2  | <i>PRKD3</i>     | 1.71210476  | 0.775770979  | 0.002665426 | 0.021569624 | Up   |
| A | chr11 | <i>ARNTL</i>     | 3.413505593 | 1.771254116  | 0.003283813 | 0.024935204 | Up   |
| A | chr7  | <i>PRKAR2B</i>   | 1.675635527 | 0.744708378  | 0.008210305 | 0.04677831  | Up   |
| A | chr19 | <i>EMC10</i>     | 0.296052598 | -1.756074579 | 3.56E-05    | 0.001031639 | Down |
| A | chr6  | <i>GFOD1</i>     | 0.19433682  | -2.363368831 | 6.44E-07    | 5.07E-05    | Down |
| A | chr7  | <i>MDH2</i>      | 0.362038049 | -1.465786768 | 2.23E-07    | 2.34E-05    | Down |
| A | chr17 | <i>CAMTA2</i>    | 0.315721722 | -1.663274571 | 0.00061667  | 0.007899307 | Down |
| A | chr12 | <i>IPO8</i>      | 1.955402919 | 0.967465911  | 0.00297716  | 0.023200519 | Up   |
| A | chr11 | <i>PHRF1</i>     | 0.563830515 | -0.826666535 | 0.006052504 | 0.03762441  | Down |
| A | chr17 | <i>HGS</i>       | 0.524901791 | -0.929880575 | 0.004749817 | 0.03205758  | Down |
| A | chr21 | <i>PSMG1</i>     | 7.660359883 | 2.937412171  | 4.60E-07    | 4.03E-05    | Up   |
| A | chr20 | <i>TOX2</i>      | 0.192744708 | -2.375236843 | 0.005491241 | 0.035175048 | Down |
| A | chr8  | <i>GPAA1</i>     | 0.507879443 | -0.977442014 | 0.008233735 | 0.046830043 | Down |
| A | chr7  | <i>TES</i>       | 1.705418655 | 0.770125943  | 0.004618082 | 0.031481446 | Up   |
| A | chr12 | <i>KCNA1</i>     | 0.081787917 | -3.611968472 | 0.000336336 | 0.005087127 | Down |
| A | chrX  | <i>CXorf23</i>   | 2.193103965 | 1.132974205  | 0.008467051 | 0.047658655 | Up   |
| A | chr6  | <i>FOXO3</i>     | 0.273372371 | -1.871060654 | 5.19E-07    | 4.37E-05    | Down |
| A | chr12 | <i>KCNA6</i>     | 0           | #NAME?       | 3.81E-06    | 0.000194287 | Down |
| A | chr12 | <i>MTERFD3</i>   | 20.15965514 | 4.333399055  | 9.51E-05    | 0.002078553 | Up   |
| A | chr7  | <i>AGFG2</i>     | 0.260836609 | -1.938781725 | 3.87E-05    | 0.001102645 | Down |
| A | chr14 | <i>MED6</i>      | 2.134878833 | 1.094154191  | 0.007205111 | 0.04257506  | Up   |
| A | chr1  | <i>PIGV</i>      | 0.427212075 | -1.226975671 | 0.006415858 | 0.03917034  | Down |
| A | chr18 | <i>LAMA3</i>     | 0.094784879 | -3.399199265 | 0.000109435 | 0.002281868 | Down |
| A | chr9  | <i>VPS13A</i>    | 2.292904979 | 1.197176569  | 2.18E-06    | 0.000126207 | Up   |
| A | chr7  | <i>BET1</i>      | 2.181857597 | 1.125556945  | 0.007102621 | 0.042141139 | Up   |
| A | chr15 | <i>FSD2</i>      | 0.127609295 | -2.970194678 | 0.005355479 | 0.034589344 | Down |
| A | chr13 | <i>KPNA3</i>     | 1.60566677  | 0.683172516  | 0.005799796 | 0.036537036 | Up   |
| A | chr8  | <i>RAB11FIP1</i> | 0.250533803 | -1.996922824 | 0.006616974 | 0.040079516 | Down |
| A | chr9  | <i>PSIP1</i>     | 1.870111013 | 0.903123913  | 0.002243772 | 0.019130238 | Up   |
| A | chr2  | <i>POTEF</i>     | 0.574556615 | -0.799479036 | 0.00495269  | 0.032932992 | Down |
| A | chr2  | <i>KCNK12</i>    | 0.108769975 | -3.200647732 | 8.81E-14    | 6.77E-11    | Down |
| A | chrX  | <i>CETN2</i>     | 1.806297539 | 0.853035557  | 0.008323512 | 0.047135271 | Up   |
| A | chr17 | <i>ATXN7L3</i>   | 0.600331018 | -0.736169883 | 0.003035492 | 0.023514706 | Down |
| A | chr14 | <i>OXA1L</i>     | 0.336124719 | -1.572931449 | 0.000325513 | 0.004957905 | Down |
| A | chr1  | <i>ADAM15</i>    | 0.325764681 | -1.618097898 | 0.000272454 | 0.004363615 | Down |
| A | chr2  | <i>VRK2</i>      | 2.487557745 | 1.314730016  | 0.001296735 | 0.013146525 | Up   |
| A | chr22 | <i>TMEM184B</i>  | 0.363372945 | -1.460477089 | 0.000254493 | 0.004165362 | Down |
| A | chr15 | <i>NARG2</i>     | 2.255550256 | 1.173479431  | 0.001932827 | 0.017280266 | Up   |
| A | chr20 | <i>SUMO1P1</i>   | 3.32825263  | 1.734764945  | 7.18E-05    | 0.001729057 | Up   |
| A | chr9  | <i>PTENP1</i>    | 1.951889163 | 0.964871132  | 0.000408797 | 0.005889651 | Up   |
| A | chr6  | <i>FOXP4</i>     | 0.22278051  | -2.166305073 | 0.000350593 | 0.005272231 | Down |
| A | chr16 | <i>ZFPM1</i>     | 0.191943092 | -2.381249458 | 1.07E-08    | 2.26E-06    | Down |
| A | chr14 | <i>NFKBIA</i>    | 0.502146533 | -0.993819672 | 0.000736417 | 0.008908667 | Down |
| A | chr5  | <i>LOC644936</i> | 0.319130502 | -1.647781587 | 2.75E-08    | 4.60E-06    | Down |

|   |       |                 |             |              |             |             |      |
|---|-------|-----------------|-------------|--------------|-------------|-------------|------|
| A | chr6  | <i>TBC1D22B</i> | 0.480222442 | -1.058225269 | 0.002378565 | 0.019882215 | Down |
| A | chr18 | <i>GALNT1</i>   | 1.785976741 | 0.836713292  | 0.000581907 | 0.007603236 | Up   |
| A | chr6  | <i>ASCC3</i>    | 1.855495777 | 0.891804718  | 0.000361324 | 0.005402472 | Up   |
| A | chr17 | <i>SENP3</i>    | 9.063033648 | 3.179994041  | 0.000205509 | 0.00356878  | Up   |
| A | chr22 | <i>CARD10</i>   | 0.042133169 | -4.56889975  | 1.25E-07    | 1.53E-05    | Down |
| A | chr7  | <i>CROT</i>     | 2.013232636 | 1.009513891  | 0.001499442 | 0.014555297 | Up   |
| A | chr18 | <i>OSBPL1A</i>  | 2.095121949 | 1.06703422   | 7.84E-05    | 0.001829714 | Up   |
| A | chr5  | <i>KIAA0141</i> | 0.497919283 | -1.006016207 | 0.003898108 | 0.027943283 | Down |
| A | chr1  | <i>GMEB1</i>    | 0.510694487 | -0.969467611 | 0.001543638 | 0.014870191 | Down |
| A | chr12 | <i>MBD6</i>     | 0.235863187 | -2.083977828 | 5.31E-06    | 0.00024748  | Down |
| A | chr11 | <i>RPLPOP2</i>  | 0.127643682 | -2.969805959 | 5.55E-10    | 1.88E-07    | Down |
| A | chr12 | <i>SP7</i>      | 0.028444736 | -5.135694484 | 0.004195579 | 0.029554718 | Down |
| A | chr1  | <i>STK40</i>    | 0.431054582 | -1.214057533 | 0.004649462 | 0.031576185 | Down |
| A | chr19 | <i>SPHK2</i>    | 0.389866952 | -1.358946227 | 0.008254252 | 0.046885444 | Down |
| A | chr12 | <i>SCARNA11</i> | 0.257533804 | -1.957166283 | 1.04E-05    | 0.000403634 | Down |
| A | chr12 | <i>SOX5</i>     | 0.245570647 | -2.025789969 | 0.000608303 | 0.007830549 | Down |
| A | chr11 | <i>KCNC1</i>    | 0.083848162 | -3.576077027 | 0.003744539 | 0.027244964 | Down |
| A | chr1  | <i>NCDN</i>     | 0.30673583  | -1.704931396 | 5.04E-09    | 1.22E-06    | Down |
| A | chr15 | <i>UBE2Q2</i>   | 2.517808358 | 1.332168477  | 9.19E-06    | 0.000367786 | Up   |
| A | chr1  | <i>BCL2L15</i>  | 0.073234431 | -3.771334094 | 0.004681565 | 0.031715225 | Down |
| A | chr17 | <i>SRP68</i>    | 0.619175623 | -0.691579421 | 0.007821162 | 0.04515242  | Down |
| A | chr2  | <i>FASTKD2</i>  | 8.257454902 | 3.045697185  | 0.000247713 | 0.00408258  | Up   |
| A | chr14 | <i>SRP54</i>    | 2.205290019 | 1.140968398  | 4.13E-06    | 0.000204912 | Up   |
| A | chr12 | <i>EP400NL</i>  | Inf         | Inf          | 0.001184737 | 0.012332037 | Up   |
| A | chr3  | <i>SMC4</i>     | 2.20390568  | 1.140062483  | 1.35E-05    | 0.000487856 | Up   |
| A | chrX  | <i>DKC1</i>     | 1.785375139 | 0.836227242  | 0.002518314 | 0.02071301  | Up   |
| A | chr19 | <i>DUS3L</i>    | 0.339066752 | -1.560358771 | 0.000692685 | 0.008501209 | Down |
| A | chr11 | <i>GPR137</i>   | 0.437807345 | -1.191631935 | 0.002705024 | 0.021795483 | Down |
| A | chr4  | <i>ZNF330</i>   | 2.275068257 | 1.18590983   | 0.001772704 | 0.016264797 | Up   |
| A | chr11 | <i>ALG1L9P</i>  | 0           | #NAME?       | 0.007726505 | 0.044693298 | Down |
| A | chr1  | <i>PEAR1</i>    | 0.295411668 | -1.759201286 | 0.000122208 | 0.002464217 | Down |
| A | chr7  | <i>PNPLA8</i>   | 3.132438561 | 1.647286213  | 1.18E-06    | 8.29E-05    | Up   |
| A | chr9  | <i>NOL6</i>     | 0.445597486 | -1.166187003 | 0.000358493 | 0.005366296 | Down |
| A | chr2  | <i>CCT4</i>     | 1.746833549 | 0.804742144  | 0.005363119 | 0.034608905 | Up   |
| A | chr9  | <i>NOL8</i>     | 2.729172802 | 1.448463744  | 0.00223736  | 0.019117077 | Up   |
| A | chr3  | <i>RPL24</i>    | 2.521068669 | 1.334035415  | 4.71E-06    | 0.00022652  | Up   |
| A | chr16 | <i>DUS2L</i>    | 0.403901126 | -1.307925926 | 0.002950908 | 0.023037204 | Down |
| A | chr22 | <i>LDOC1L</i>   | 0.145519371 | -2.780716879 | 0.001401883 | 0.01383128  | Down |
| A | chr17 | <i>TRIM25</i>   | 0.380328424 | -1.394682332 | 0.000232099 | 0.003919268 | Down |
| A | chr20 | <i>DPM1</i>     | 2.092360202 | 1.065131235  | 0.00238701  | 0.019934512 | Up   |
| A | chr10 | <i>MTRNR2L5</i> | 0.264999707 | -1.91593733  | 8.81E-14    | 6.77E-11    | Down |
| A | chr6  | <i>GRM4</i>     | 0           | #NAME?       | 0.006379266 | 0.039019943 | Down |
| A | chr4  | <i>PDE5A</i>    | 3.293312456 | 1.719539395  | 0.000270813 | 0.004348002 | Up   |
| A | chrX  | <i>MAGT1</i>    | 2.07960594  | 1.056310181  | 0.000994073 | 0.010940671 | Up   |

|   |       |           |             |              |             |             |      |
|---|-------|-----------|-------------|--------------|-------------|-------------|------|
| A | chr19 | WIZ       | 0.207478568 | -2.268965775 | 0.000594004 | 0.007693406 | Down |
| A | chr7  | RAPGEF5   | 3.587960027 | 1.843163818  | 0.001574442 | 0.01507791  | Up   |
| A | chr4  | TMEM128   | 4.901670382 | 2.293273472  | 0.000153187 | 0.002897896 | Up   |
| A | chr19 | SUV420H2  | 0.454729826 | -1.13691846  | 0.001399437 | 0.01383128  | Down |
| A | chr16 | TUBB3     | 0.510896956 | -0.968895755 | 2.55E-05    | 0.000790926 | Down |
| A | chr11 | FAU       | 0.563372041 | -0.827840128 | 0.000401229 | 0.005838622 | Down |
| A | chr17 | RABEP1    | 1.73972689  | 0.798860843  | 0.004328768 | 0.030071002 | Up   |
| A | chr9  | PHF2      | 0.482628308 | -1.051015556 | 0.005237768 | 0.034082049 | Down |
| A | chr6  | SNORA29   | 0.251703236 | -1.99020433  | 7.70E-07    | 5.85E-05    | Down |
| A | chr15 | CALML4    | 4.265857364 | 2.092835728  | 0.007224734 | 0.042633116 | Up   |
| A | chr4  | NEK1      | 1.871220535 | 0.903979599  | 0.004177284 | 0.029505458 | Up   |
| A | chr5  | RHOBTB3   | 3.21621548  | 1.685364068  | 1.50E-06    | 9.77E-05    | Up   |
| A | chr7  | SAMD9L    | 3.042774453 | 1.605387397  | 2.18E-07    | 2.31E-05    | Up   |
| A | chr1  | ZZZ3      | 1.910529422 | 0.933972475  | 0.000312424 | 0.004803379 | Up   |
| A | chr17 | TRIM37    | 1.693074121 | 0.759645134  | 0.003823918 | 0.027607083 | Up   |
| A | chr16 | MAZ       | 0.304199721 | -1.716909265 | 1.64E-13    | 1.19E-10    | Down |
| A | chr9  | FBXW5     | 0.487511803 | -1.036490946 | 0.001069094 | 0.011485502 | Down |
| A | chr4  | MYL5      | 9.611761628 | 3.26480087   | 0.007398752 | 0.043346456 | Up   |
| A | chr19 | ZBTB7A    | 0.254317879 | -1.975295207 | 4.59E-08    | 6.81E-06    | Down |
| A | chr6  | RGL2      | 0.599496999 | -0.738175564 | 0.006811372 | 0.040821321 | Down |
| A | chr6  | SNORA38   | 0.145815758 | -2.777781458 | 0.007850042 | 0.045260031 | Down |
| A | chr5  | TNIP1     | 0.464756076 | -1.105454367 | 0.00065614  | 0.008196179 | Down |
| A | chr16 | CDH8      | 3.777520513 | 1.91743959   | 0.000617882 | 0.007900616 | Up   |
| A | chr7  | LOC407835 | 0.411587883 | -1.280727584 | 0.000742285 | 0.008954753 | Down |
| A | chr3  | PIK3CA    | 1.69904287  | 0.764722255  | 0.003288383 | 0.024940882 | Up   |
| A | chr19 | DHX34     | 0.322183105 | -1.634047254 | 4.39E-05    | 0.001192992 | Down |
| A | chr9  | GCNT1     | 3.112360068 | 1.638008975  | 0.000234216 | 0.003934648 | Up   |
| A | chr2  | FKBP7     | Inf         | Inf          | 0.00146536  | 0.014284796 | Up   |
| A | chr1  | KIAA0754  | 1.809389358 | 0.855502892  | 0.007235116 | 0.042675088 | Up   |
| A | chr12 | USP15     | 1.695934495 | 0.762080447  | 0.001853798 | 0.016831651 | Up   |
| A | chr1  | SEMA6C    | 0.164433704 | -2.604422057 | 0.000181981 | 0.003276418 | Down |
| A | chr14 | OSGEP     | 3.057724273 | 1.612458319  | 0.002402358 | 0.020014321 | Up   |
| A | chr12 | ENDOU     | 0.039498115 | -4.662072382 | 0.000175723 | 0.003203513 | Down |
| A | chrX  | XIST      | 61.60827349 | 5.945052201  | 0.00020887  | 0.003606324 | Up   |
| A | chr20 | PLK1S1    | 2.676456259 | 1.420324075  | 0.00024686  | 0.00407365  | Up   |
| A | chr12 | STX2      | 0.375821317 | -1.411881194 | 0.008775181 | 0.048803768 | Down |
| A | chr10 | ACADSB    | 3.345908905 | 1.742398167  | 0.004516328 | 0.030945735 | Up   |
| A | chr21 | GABPA     | 2.507254749 | 1.326108588  | 0.000367968 | 0.005476725 | Up   |
| A | chr2  | EIF2AK2   | 2.995756678 | 1.582920449  | 0.003351836 | 0.025303568 | Up   |
| A | chr15 | DMXL2     | 2.85738423  | 1.514695047  | 0.000433148 | 0.006152209 | Up   |
| A | chr2  | TLK1      | 1.732703754 | 0.793025013  | 0.00476177  | 0.032121648 | Up   |
| A | chr17 | CCL4      | 0.047407894 | -4.39872889  | 0.001533698 | 0.014813909 | Down |
| A | chr12 | MYL2      | Inf         | Inf          | 0.000446596 | 0.006304742 | Up   |
| A | chr11 | ARAP1     | 0.41149395  | -1.281056876 | 0.000783736 | 0.0093001   | Down |

|   |       |                 |             |              |             |             |      |
|---|-------|-----------------|-------------|--------------|-------------|-------------|------|
| A | chr2  | <i>KCNIP3</i>   | 16.58920834 | 4.052173135  | 0.001136291 | 0.011990301 | Up   |
| A | chr2  | <i>HPCAL1</i>   | 0.338298309 | -1.563632129 | 4.13E-05    | 0.001156474 | Down |
| A | chr16 | <i>ST3GAL2</i>  | 0.466853161 | -1.098959243 | 0.003882846 | 0.027878323 | Down |
| A | chr17 | <i>CCDC43</i>   | 3.365217248 | 1.750699644  | 0.001926976 | 0.017239768 | Up   |
| A | chr2  | <i>TYW5</i>     | 3.777520513 | 1.91743959   | 0.002323238 | 0.019560033 | Up   |
| A | chr17 | <i>MYBBP1A</i>  | 0.527051444 | -0.923984309 | 0.001155973 | 0.012119608 | Down |
| A | chr17 | <i>CCDC47</i>   | 1.824935387 | 0.867845386  | 0.001348646 | 0.013520642 | Up   |
| A | chr7  | <i>KDELR2</i>   | 0.552766447 | -0.855258048 | 0.003846999 | 0.027712409 | Down |
| A | chr19 | <i>GLTSCR1</i>  | 0.143169706 | -2.804201837 | 1.02E-08    | 2.18E-06    | Down |
| A | chr15 | <i>SLC28A2</i>  | 2.048571384 | 1.034618166  | 0.001055833 | 0.011427683 | Up   |
| A | chr17 | <i>KSR1</i>     | 0.336748976 | -1.570254535 | 0.000890203 | 0.010160967 | Down |
| A | chr4  | <i>FBXW7</i>    | 1.713929177 | 0.777307496  | 0.005641142 | 0.035831547 | Up   |
| A | chr17 | <i>BRCA1</i>    | 3.167329133 | 1.663266793  | 0.000145545 | 0.002814521 | Up   |
| A | chr2  | <i>IRS1</i>     | 0.068458322 | -3.868630267 | 0.001104017 | 0.011755411 | Down |
| A | chr1  | <i>KIAA2013</i> | 0.31208882  | -1.679971417 | 0.000213339 | 0.003664101 | Down |
| A | chr2  | <i>SPOPL</i>    | 1.927872061 | 0.947009314  | 0.002083129 | 0.018292798 | Up   |
| A | chr1  | <i>HLX</i>      | 0.130967434 | -2.932719972 | 2.78E-06    | 0.000151922 | Down |
| A | chr19 | <i>HIF3A</i>    | 0.216380978 | -2.208354415 | 0.003799516 | 0.02751309  | Down |
| A | chr10 | <i>ARHGAP12</i> | 2.522412581 | 1.334804271  | 8.30E-05    | 0.001915951 | Up   |
| A | chr8  | <i>TMED10P1</i> | 0.24043335  | -2.056291069 | 0.00085457  | 0.009915288 | Down |
| A | chr12 | <i>RAPGEF3</i>  | 0.296663776 | -1.753099316 | 0.001638245 | 0.015506898 | Down |
| A | chr17 | <i>HOXB9</i>    | 0.058678561 | -4.091022688 | 0.001838833 | 0.016749674 | Down |
| A | chr4  | <i>RASGEF1B</i> | 4.635425666 | 2.212701826  | 0.002998801 | 0.023327386 | Up   |
| A | chr2  | <i>LRP1B</i>    | 0.031605263 | -4.983691391 | 7.35E-05    | 0.001760487 | Down |
| A | chr11 | <i>SNORA23</i>  | 0.26704899  | -1.904823667 | 7.39E-11    | 3.22E-08    | Down |
| A | chr2  | <i>CTDSP1</i>   | 0.372909975 | -1.423100707 | 3.01E-06    | 0.000161546 | Down |
| A | chr14 | <i>PNN</i>      | 1.654465456 | 0.72636517   | 0.004258401 | 0.029772312 | Up   |
| A | chr3  | <i>APEH</i>     | 0.543951952 | -0.878448872 | 0.001504476 | 0.014589844 | Down |
| A | chrX  | <i>ATP11C</i>   | 1.693658715 | 0.76014319   | 0.002756712 | 0.021981285 | Up   |
| A | chr14 | <i>HIF1A</i>    | 1.68062441  | 0.748997343  | 0.005281488 | 0.034278091 | Up   |
| A | chr3  | <i>TOPBP1</i>   | 2.447980054 | 1.291591803  | 1.36E-06    | 9.18E-05    | Up   |
| A | chr19 | <i>MARK4</i>    | 0.279684339 | -1.838128623 | 0.002819637 | 0.022332958 | Down |
| A | chr6  | <i>VAR5</i>     | 0.543960638 | -0.878425835 | 0.000190833 | 0.003412253 | Down |
| A | chr4  | <i>SMARCA5</i>  | 2.024255704 | 1.017391543  | 0.002107706 | 0.018427249 | Up   |
| A | chr2  | <i>NRXN1</i>    | 1.916883864 | 0.938762933  | 0.000319176 | 0.004885806 | Up   |
| A | chr17 | <i>NLGN2</i>    | 0.410182796 | -1.285661111 | 0.003660288 | 0.026736082 | Down |
| A | chr12 | <i>ATP2B1</i>   | 1.665442082 | 0.735905183  | 0.004181542 | 0.029506804 | Up   |
| A | chr11 | <i>KCNJ5</i>    | 0.211839678 | -2.238955262 | 0.001511382 | 0.014624213 | Down |
| A | chr3  | <i>DCUN1D1</i>  | 1.896151083 | 0.923073921  | 0.000325908 | 0.004958135 | Up   |
| A | chr11 | <i>TCIRG1</i>   | 0.517897214 | -0.949262297 | 0.001716657 | 0.015948418 | Down |
| A | chr16 | <i>FBXL19</i>   | 0.349569642 | -1.516348194 | 5.10E-07    | 4.37E-05    | Down |
| A | chr5  | <i>RNF44</i>    | 0.480756564 | -1.056621538 | 0.007655026 | 0.044389627 | Down |
| A | chr10 | <i>SLK</i>      | 1.747902261 | 0.805624515  | 0.00142184  | 0.013968558 | Up   |
| A | chr14 | <i>SERPINA1</i> | 0           | #NAME?       | 7.74E-05    | 0.00181448  | Down |

|   |       |                 |             |              |             |             |      |
|---|-------|-----------------|-------------|--------------|-------------|-------------|------|
| A | chr5  | <i>TAF7</i>     | 2.178219774 | 1.123149524  | 0.00100515  | 0.011034667 | Up   |
| A | chr19 | <i>KCNN4</i>    | 0.461985174 | -1.114081541 | 0.005262602 | 0.034192508 | Down |
| A | chr1  | <i>SWT1</i>     | 2.941472352 | 1.556538476  | 0.000108129 | 0.002266196 | Up   |
| A | chr5  | <i>RASA1</i>    | 1.696275106 | 0.762370169  | 0.00212607  | 0.018550532 | Up   |
| A | chr5  | <i>DNAJC21</i>  | 2.281128221 | 1.189747542  | 0.00612763  | 0.03799713  | Up   |
| A | chr1  | <i>CACYBP</i>   | 2.497241053 | 1.320335088  | 0.005364931 | 0.034608905 | Up   |
| A | chr17 | <i>ATP1B2</i>   | 0.091631565 | -3.448011534 | 1.67E-08    | 3.21E-06    | Down |
| A | chr20 | <i>PCIF1</i>    | 0.429560766 | -1.219065864 | 1.68E-06    | 0.000105503 | Down |
| A | chr5  | <i>TTC37</i>    | 2.241313152 | 1.164344234  | 4.98E-05    | 0.001295503 | Up   |
| A | chr6  | <i>HIST1H1E</i> | 0.66433093  | -0.59002601  | 0.008388133 | 0.047357397 | Down |
| A | chr22 | <i>RHBDD3</i>   | 0.19750327  | -2.340051555 | 0.001779562 | 0.016289359 | Down |
| A | chr4  | <i>RNF4</i>     | 1.736144814 | 0.79588729   | 0.003951857 | 0.028234043 | Up   |
| A | chr11 | <i>STARD10</i>  | 0.580458907 | -0.784734159 | 0.004256505 | 0.029772312 | Down |
| A | chr2  | <i>TCF7L1</i>   | 0.080851381 | -3.62858378  | 0.000699238 | 0.008554033 | Down |
| A | chr13 | <i>BRCA2</i>    | 5.062429731 | 2.339829978  | 1.85E-06    | 0.000113067 | Up   |
| A | chr11 | <i>USP47</i>    | 1.617181761 | 0.693481838  | 0.005153653 | 0.033685842 | Up   |
| A | chr12 | <i>DHX37</i>    | 0.278383806 | -1.844852807 | 4.61E-05    | 0.001238024 | Down |
| A | chr5  | <i>MATR3</i>    | 1.808620627 | 0.854889823  | 0.001388195 | 0.013769084 | Up   |
| A | chr5  | <i>SKP1</i>     | 1.726612206 | 0.787944092  | 0.002099807 | 0.018382819 | Up   |
| A | chr20 | <i>TM9SF4</i>   | 0.529433061 | -0.917479807 | 0.001430109 | 0.014024956 | Down |
| A | chr1  | <i>ELTD1</i>    | 1.795930903 | 0.844731845  | 0.000548108 | 0.007295269 | Up   |
| A | chr4  | <i>CENPC1</i>   | Inf         | Inf          | 0.00467732  | 0.031715225 | Up   |
| A | chr22 | <i>DES11</i>    | 0.369015224 | -1.438247756 | 7.43E-06    | 0.000316029 | Down |
| A | chr1  | <i>ZNF362</i>   | 0.204652846 | -2.288749362 | 1.54E-06    | 9.85E-05    | Down |
| A | chr9  | <i>SH2D3C</i>   | 0.208812691 | -2.259718695 | 1.53E-06    | 9.85E-05    | Down |
| A | chr17 | <i>MMD</i>      | 0.469913847 | -1.089531813 | 0.004575842 | 0.031287832 | Down |
| A | chr2  | <i>EPC2</i>     | 1.97661814  | 0.983034186  | 8.53E-05    | 0.001946232 | Up   |
| A | chr19 | <i>TBC1D17</i>  | 0.401878157 | -1.315169928 | 0.000635089 | 0.00805358  | Down |
| A | chr17 | <i>ALKBH5</i>   | 0.446543795 | -1.163126421 | 8.46E-05    | 0.001935778 | Down |
| A | chr16 | <i>PIGQ</i>     | 0.323171012 | -1.629630297 | 0.000178509 | 0.003240729 | Down |
| A | chr16 | <i>PDXDC1</i>   | 2.210472917 | 1.144355058  | 0.000792016 | 0.009381287 | Up   |
| A | chr15 | <i>LYSMD2</i>   | 6.277648337 | 2.650224214  | 0.003650783 | 0.026717553 | Up   |
| A | chr14 | <i>MTA1</i>     | 0.502642096 | -0.992396594 | 4.32E-05    | 0.001184956 | Down |
| A | chr19 | <i>SIRT2</i>    | 0.356438973 | -1.488273003 | 0.003203757 | 0.024483983 | Down |
| A | chr12 | <i>OTOGL</i>    | 0.19976502  | -2.323624111 | 0.007593714 | 0.044220639 | Down |
| A | chr7  | <i>GNB2</i>     | 0.465001975 | -1.10469125  | 2.69E-06    | 0.000148141 | Down |
| A | chr2  | <i>TTC30A</i>   | 6.208656842 | 2.634281195  | 0.006171747 | 0.038234371 | Up   |
| A | chr20 | <i>TPD52L2</i>  | 1.910897157 | 0.934250135  | 0.006323611 | 0.038861626 | Up   |
| A | chr6  | <i>VPS52</i>    | 0.380702306 | -1.393264784 | 9.07E-06    | 0.000364153 | Down |
| A | chr2  | <i>NABP1</i>    | 2.208930701 | 1.143348159  | 0.001452924 | 0.01418476  | Up   |
| A | chr13 | <i>KIAA1704</i> | 1.979740109 | 0.985311053  | 0.005126365 | 0.033649857 | Up   |
| A | chr11 | <i>CWF19L2</i>  | 2.247826486 | 1.168530676  | 0.005851574 | 0.036745505 | Up   |
| A | chr6  | <i>TRMT11</i>   | 2.335968797 | 1.224021003  | 0.001422218 | 0.013968558 | Up   |
| A | chrX  | <i>IGBP1</i>    | 2.19286215  | 1.132815123  | 0.00201543  | 0.017822278 | Up   |

|   |       |                   |             |              |             |             |      |
|---|-------|-------------------|-------------|--------------|-------------|-------------|------|
| A | chr20 | <i>RBM38</i>      | 0.38938836  | -1.360718337 | 0.000364355 | 0.005441558 | Down |
| A | chr20 | <i>RBM39</i>      | 2.079309638 | 1.056104612  | 0.000487285 | 0.006688252 | Up   |
| A | chr7  | <i>SLC12A9</i>    | 0.225010332 | -2.151936844 | 0.00019493  | 0.003443062 | Down |
| A | chr22 | <i>GGA1</i>       | 0.463731485 | -1.108638414 | 0.000392801 | 0.005741579 | Down |
| A | chr1  | <i>HNRNPR</i>     | 1.994005417 | 0.995669329  | 0.000454881 | 0.006384473 | Up   |
| A | chr12 | <i>ERGIC2</i>     | 2.31612747  | 1.211714656  | 0.001358356 | 0.013565889 | Up   |
| A | chr17 | <i>MNT</i>        | 0.394400544 | -1.342266553 | 4.94E-06    | 0.000235233 | Down |
| A | chr1  | <i>LDLRAP1</i>    | 0.399830441 | -1.32253978  | 0.000111185 | 0.002310977 | Down |
| A | chr6  | <i>HIST1H3A</i>   | 0.296592003 | -1.753448398 | 4.34E-08    | 6.58E-06    | Down |
| A | chr8  | <i>RUNX1T1</i>    | 0.164063234 | -2.607676119 | 6.25E-07    | 4.97E-05    | Down |
| A | chr11 | <i>SNORA57</i>    | 0.16945002  | -2.561068284 | 3.95E-08    | 6.23E-06    | Down |
| A | chr6  | <i>HIST1H3C</i>   | 0.070198193 | -3.832422301 | 2.59E-13    | 1.78E-10    | Down |
| A | chr6  | <i>HIST1H3D</i>   | 0.330735685 | -1.596249382 | 4.79E-07    | 4.14E-05    | Down |
| A | chr6  | <i>HIST1H3E</i>   | 0.057933108 | -4.109468132 | 1.76E-05    | 0.000600836 | Down |
| A | chr6  | <i>HIST1H3F</i>   | 0.125770228 | -2.991137645 | 4.54E-14    | 3.95E-11    | Down |
| A | chr3  | <i>STAG1</i>      | 1.99780372  | 0.998414848  | 4.12E-05    | 0.001156155 | Up   |
| A | chr6  | <i>HIST1H3G</i>   | 0.297605233 | -1.748528202 | 0.001242641 | 0.012822287 | Down |
| A | chr6  | <i>HIST1H3H</i>   | 0.195654274 | -2.353621469 | 9.02E-17    | 1.18E-13    | Down |
| A | chr6  | <i>HIST1H3I</i>   | 0.074791222 | -3.740987225 | 0.001070775 | 0.011494104 | Down |
| A | chr6  | <i>HIST1H3J</i>   | 0.226193223 | -2.144372388 | 0.007479102 | 0.043679965 | Down |
| A | chr6  | <i>ATAT1</i>      | 0.426124754 | -1.230652233 | 0.002453987 | 0.020337713 | Down |
| A | chr7  | <i>MIOS</i>       | 1.914022341 | 0.93660767   | 0.001175587 | 0.012256335 | Up   |
| A | chr19 | <i>AP3D1</i>      | 0.616463131 | -0.697913481 | 0.00883444  | 0.049028886 | Down |
| A | chr19 | <i>ZNF317</i>     | 2.780625117 | 1.475409254  | 0.006053111 | 0.03762441  | Up   |
| A | chr17 | <i>SLC16A11</i>   | 0.185916649 | -2.427272128 | 0.000285895 | 0.004534367 | Down |
| A | chr15 | <i>KIAA0101</i>   | 2.105024119 | 1.073836764  | 0.001681682 | 0.015746773 | Up   |
| A | chr1  | <i>SH2D5</i>      | 0.456048356 | -1.132741289 | 0.002205608 | 0.018974443 | Down |
| A | chr6  | <i>PAQR8</i>      | 0.294388556 | -1.764206508 | 0.002724211 | 0.021882542 | Down |
| A | chr5  | <i>HOMER1</i>     | 2.611039981 | 1.384624549  | 0.008345775 | 0.047240853 | Up   |
| A | chr11 | <i>NCAPD3</i>     | 2.345882686 | 1.230130868  | 6.65E-05    | 0.001630643 | Up   |
| A | chr3  | <i>NAT6</i>       | 0.40485568  | -1.304520378 | 0.002744632 | 0.021930886 | Down |
| A | chr17 | <i>MIR21</i>      | 0.338323189 | -1.563526031 | 0.002293914 | 0.019468439 | Down |
| A | chr11 | <i>TRPC6</i>      | 6.729742193 | 2.750551238  | 5.12E-06    | 0.000241193 | Up   |
| A | chr10 | <i>CSGALNACT2</i> | 1.864418914 | 0.898726054  | 0.002760438 | 0.021997554 | Up   |
| A | chr11 | <i>RELA</i>       | 0.42362843  | -1.239128682 | 2.22E-05    | 0.000710384 | Down |
| A | chr6  | <i>HIST1H4A</i>   | 0.305230759 | -1.712027739 | 3.64E-06    | 0.000188399 | Down |
| A | chr6  | <i>HIST1H4B</i>   | 0.195612532 | -2.353929292 | 3.39E-11    | 1.70E-08    | Down |
| A | chr6  | <i>HIST1H4C</i>   | 0.075475131 | -3.727854835 | 0.000170673 | 0.003124531 | Down |
| A | chr11 | <i>MARK2</i>      | 0.372402179 | -1.42506658  | 0.002153122 | 0.018723987 | Down |
| A | chr6  | <i>HIST1H4F</i>   | 0.447926682 | -1.158665489 | 0.00620613  | 0.038338196 | Down |
| A | chr2  | <i>SOX11</i>      | 0.044754375 | -4.481827477 | 0.0012566   | 0.012935646 | Down |
| A | chr16 | <i>TMCS</i>       | 0.050270328 | -4.314149079 | 0.005288013 | 0.034289336 | Down |
| A | chr6  | <i>ZNF292</i>     | 1.989155296 | 0.992155914  | 6.02E-05    | 0.001506362 | Up   |
| A | chr6  | <i>HIST1H4H</i>   | 0.176187378 | -2.504817521 | 0.000105467 | 0.002227611 | Down |

|   |       |                 |             |              |             |             |      |
|---|-------|-----------------|-------------|--------------|-------------|-------------|------|
| A | chr6  | <i>HIST1H4I</i> | 0.256133794 | -1.965030481 | 3.39E-07    | 3.21E-05    | Down |
| A | chr20 | <i>MTRNR2L3</i> | 0.476403347 | -1.069744546 | 0.002694726 | 0.021725918 | Down |
| A | chr2  | <i>PMS1</i>     | 8.203590935 | 3.036255555  | 1.33E-08    | 2.66E-06    | Up   |
| A | chr11 | <i>LRP5</i>     | 0.361952455 | -1.466127891 | 0.000146022 | 0.002815409 | Down |
| A | chr10 | <i>SLC29A3</i>  | 0.313250407 | -1.674611711 | 0.005124517 | 0.033649857 | Down |
| A | chr2  | <i>VPS54</i>    | 1.837984484 | 0.878124588  | 0.000621715 | 0.007940556 | Up   |
| A | chrX  | <i>RPS6KA3</i>  | 1.778156841 | 0.830382582  | 0.000872543 | 0.010025798 | Up   |
| A | chr17 | <i>CCR7</i>     | 0.212563365 | -2.234035125 | 0.00193545  | 0.017291874 | Down |
| A | chr19 | <i>ZNF320</i>   | 3.321821946 | 1.731974745  | 0.008205366 | 0.046770586 | Up   |
| A | chr12 | <i>NCKAP5L</i>  | 0.159693076 | -2.646626333 | 8.67E-06    | 0.000355572 | Down |
| A | chr10 | <i>GHITM</i>    | 2.240286122 | 1.163683001  | 3.13E-05    | 0.000930345 | Up   |
| A | chr19 | <i>PKN1</i>     | 0.597147309 | -0.743841224 | 0.003940667 | 0.028182259 | Down |
| A | chr7  | <i>POLD2</i>    | 0.482484647 | -1.051445058 | 0.000380496 | 0.005586745 | Down |
| A | chr12 | <i>NEDD1</i>    | 2.100132033 | 1.070480032  | 0.001162026 | 0.012173294 | Up   |
| A | chr1  | <i>CRTC2</i>    | 0.305241166 | -1.711978554 | 0.001853311 | 0.016831651 | Down |
| A | chr4  | <i>SMARCAD1</i> | 2.228575717 | 1.156121978  | 1.16E-05    | 0.000441811 | Up   |
| A | chr7  | <i>ZCWPW1</i>   | Inf         | Inf          | 0.000295138 | 0.004648395 | Up   |
| A | chr3  | <i>ZNF717</i>   | 2.286790327 | 1.193324093  | 0.008749224 | 0.048700905 | Up   |
| A | chr10 | <i>KIF20B</i>   | 2.194748247 | 1.134055462  | 0.000375437 | 0.005562008 | Up   |
| A | chr19 | <i>FCGRT</i>    | 0           | #NAME?       | 0.0077236   | 0.044693298 | Down |
| A | chr3  | <i>GOLIM4</i>   | 2.886005765 | 1.529074182  | 0.000124998 | 0.002508703 | Up   |
| A | chr1  | <i>SOX13</i>    | 0.354615456 | -1.495672679 | 0.00426604  | 0.029793804 | Down |
| A | chr17 | <i>MPO</i>      | 0.229849235 | -2.121240232 | 6.59E-16    | 7.17E-13    | Down |
| A | chr10 | <i>PIK3AP1</i>  | 0.383990117 | -1.380858917 | 5.99E-06    | 0.000266834 | Down |
| A | chr15 | <i>MAPKBP1</i>  | 0.531460786 | -0.91196485  | 0.004641568 | 0.03153898  | Down |
| A | chr6  | <i>FGD2</i>     | 0.40861202  | -1.29119645  | 4.50E-05    | 0.0012173   | Down |
| A | chr10 | <i>SEC31B</i>   | 0.344720055 | -1.536502861 | 0.003164161 | 0.024238139 | Down |
| A | chr7  | <i>COG5</i>     | 1.681102509 | 0.749407699  | 0.005097015 | 0.033549428 | Up   |
| A | chr6  | <i>PM20D2</i>   | Inf         | Inf          | 0.003550221 | 0.026240675 | Up   |
| A | chr9  | <i>GSN</i>      | 0.506575662 | -0.981150329 | 0.000835146 | 0.009755501 | Down |
| A | chr8  | <i>RNF5P1</i>   | 0.298924172 | -1.74214853  | 0.008666787 | 0.048510968 | Down |
| A | chr11 | <i>THYN1</i>    | 2.175705667 | 1.1214834    | 0.00557289  | 0.03553636  | Up   |
| A | chr8  | <i>RBM12B</i>   | 1.756197713 | 0.812455273  | 0.002268337 | 0.01930157  | Up   |
| A | chr4  | <i>HELQ</i>     | 5.569005725 | 2.477419776  | 0.007053517 | 0.041906944 | Up   |
| A | chr11 | <i>TRIM44</i>   | 1.695580638 | 0.761779397  | 0.008007066 | 0.045900846 | Up   |
| A | chr6  | <i>HDAC2</i>    | 1.804237691 | 0.851389413  | 0.00191215  | 0.017154157 | Up   |
| A | chr6  | <i>CCND3</i>    | 0.402701949 | -1.312215639 | 3.18E-05    | 0.000938677 | Down |
| A | chr16 | <i>MT1X</i>     | 0.048822954 | -4.356296595 | 0.002685055 | 0.021674717 | Down |
| A | chr1  | <i>RGSL1</i>    | 0.100540657 | -3.314149079 | 0.005104508 | 0.033566317 | Down |
| A | chr19 | <i>SAMD4B</i>   | 0.273251244 | -1.871700031 | 3.71E-11    | 1.73E-08    | Down |
| A | chr19 | <i>REXO1</i>    | 0.313704006 | -1.672524143 | 4.32E-05    | 0.001184956 | Down |
| A | chr19 | <i>PPP1R37</i>  | 0.470848818 | -1.086664188 | 0.001397508 | 0.013829922 | Down |
| A | chr1  | <i>CTPS1</i>    | 2.000802819 | 1.000578995  | 0.003280986 | 0.024933091 | Up   |
| A | chr19 | <i>PPP1R12C</i> | 0.491327925 | -1.025241857 | 0.001655248 | 0.015613262 | Down |

|   |       |                 |             |              |             |             |      |
|---|-------|-----------------|-------------|--------------|-------------|-------------|------|
| A | chr9  | <i>DCAF12</i>   | 0.611451402 | -0.709690257 | 0.004905915 | 0.032738703 | Down |
| A | chr5  | <i>ZFP2</i>     | 2.545164441 | 1.347758871  | 0.000204097 | 0.003561607 | Up   |
| A | chr5  | <i>HARS2</i>    | 2.053543389 | 1.03811543   | 0.005452079 | 0.034961686 | Up   |
| A | chr21 | <i>TSPEAR</i>   | 0           | #NAME?       | 0.000835567 | 0.009755501 | Down |
| A | chr2  | <i>TTC7A</i>    | 0.474714638 | -1.074867558 | 9.72E-05    | 0.002118889 | Down |
| A | chr11 | <i>API5</i>     | 1.932140737 | 0.950200184  | 0.00429156  | 0.029939994 | Up   |
| A | chr1  | <i>PLEKHA6</i>  | 0.413580447 | -1.273760114 | 0.005152876 | 0.033685842 | Down |
| A | chr19 | <i>POU2F2</i>   | 0.237483846 | -2.074098714 | 8.02E-06    | 0.000336678 | Down |
| A | chr3  | <i>PDHB</i>     | 1.82697387  | 0.869456     | 0.002839688 | 0.022396643 | Up   |
| A | chr3  | <i>CAPN7</i>    | 2.394866208 | 1.25994506   | 5.50E-06    | 0.000253554 | Up   |
| A | chr22 | <i>GTPBP1</i>   | 0.430865145 | -1.2146917   | 1.11E-06    | 7.86E-05    | Down |
| A | chr7  | <i>CHPF2</i>    | 0.547600095 | -0.868805399 | 0.002325685 | 0.019560033 | Down |
| A | chr1  | <i>RGL1</i>     | 0.508237392 | -0.976425574 | 0.000565302 | 0.007476075 | Down |
| A | chr1  | <i>VPS72</i>    | 0.48521572  | -1.043301804 | 0.001066659 | 0.011478232 | Down |
| A | chr12 | <i>GAPDH</i>    | 0.504252629 | -0.987781394 | 9.22E-05    | 0.002044009 | Down |
| A | chr19 | <i>PTOV1</i>    | 0.38704226  | -1.369436996 | 4.32E-06    | 0.000211397 | Down |
| A | chr17 | <i>SDK2</i>     | 0.039498115 | -4.662072382 | 0.000945425 | 0.010583735 | Down |
| A | chr4  | <i>LPHN3</i>    | 0.114539456 | -3.126083439 | 0.005328284 | 0.034481949 | Down |
| A | chr15 | <i>CASC5</i>    | 1.891752879 | 0.91972364   | 0.002480687 | 0.020480966 | Up   |
| A | chr19 | <i>SIPR4</i>    | 0.327073919 | -1.612311373 | 0.002829026 | 0.022357624 | Down |
| A | chr20 | <i>PREX1</i>    | 0.450738829 | -1.149636358 | 0.007138423 | 0.042315095 | Down |
| A | chr19 | <i>ZNF358</i>   | 0.179297403 | -2.479573503 | 1.42E-05    | 0.000508389 | Down |
| A | chr18 | <i>DTNA</i>     | 0.044912741 | -4.476731402 | 7.10E-05    | 0.001711938 | Down |
| A | chr20 | <i>DLGAP4</i>   | 0.418912072 | -1.255280635 | 2.89E-05    | 0.000877141 | Down |
| A | chr16 | <i>ZNF319</i>   | 0.263411098 | -1.924611967 | 1.86E-05    | 0.00062082  | Down |
| A | chr7  | <i>MEPCE</i>    | 0.49439997  | -1.016249439 | 0.000769412 | 0.009180193 | Down |
| A | chr15 | <i>MGA</i>      | 1.543478126 | 0.626185037  | 0.008573176 | 0.048069444 | Up   |
| A | chr2  | <i>XPO1</i>     | 1.962757585 | 0.972882001  | 0.0014506   | 0.014172667 | Up   |
| A | chr1  | <i>MPZ</i>      | 0.058678561 | -4.091022688 | 0.001371982 | 0.013644476 | Down |
| A | chr1  | <i>RLF</i>      | 2.022302053 | 1.015998496  | 0.000107704 | 0.00226386  | Up   |
| A | chr17 | <i>ABHD15</i>   | 0.336834604 | -1.569887737 | 0.0030906   | 0.023856652 | Down |
| A | chr11 | <i>DGKZ</i>     | 0.500538654 | -0.998446609 | 0.007918218 | 0.045551565 | Down |
| A | chr5  | <i>SNORA74A</i> | 0.300534552 | -1.73439723  | 6.64E-06    | 0.000287737 | Down |
| A | chr5  | <i>SNORA74B</i> | 0.278042317 | -1.846623624 | 3.77E-06    | 0.000193077 | Down |
| A | chr7  | <i>KRIT1</i>    | 2.363918931 | 1.24118056   | 5.24E-06    | 0.000245201 | Up   |
| A | chr3  | <i>U2SURP</i>   | 1.882922394 | 0.91297354   | 0.00052194  | 0.007023597 | Up   |
| A | chr3  | <i>CNBP</i>     | 1.600285604 | 0.678329407  | 0.005998304 | 0.037319286 | Up   |
| A | chr17 | <i>FAM117A</i>  | 0.419043029 | -1.254829702 | 2.50E-07    | 2.57E-05    | Down |
| A | chr2  | <i>TIA1</i>     | 2.017211337 | 1.012362239  | 8.02E-05    | 0.001865586 | Up   |
| A | chr2  | <i>EMILIN1</i>  | 0.432441831 | -1.209422011 | 0.000160918 | 0.003000652 | Down |
| A | chr11 | <i>DTX4</i>     | 0.515952407 | -0.954690102 | 0.008475876 | 0.047684471 | Down |
| A | chr20 | <i>PPDPF</i>    | 0.092692972 | -3.431396227 | 0.000375295 | 0.005562008 | Down |
| A | chr7  | <i>MOSPD3</i>   | 0.084652621 | -3.562301445 | 5.16E-07    | 4.37E-05    | Down |
| A | chr16 | <i>SALL1</i>    | 0.023703947 | -5.39872889  | 0.000727543 | 0.008842291 | Down |

|   |       |                  |             |              |             |             |      |
|---|-------|------------------|-------------|--------------|-------------|-------------|------|
| A | chr13 | <i>TDRD3</i>     | 2.196911566 | 1.135476797  | 0.000751865 | 0.009053588 | Up   |
| A | chr18 | <i>IMPACT</i>    | 3.553629093 | 1.829293109  | 0.000583894 | 0.007613953 | Up   |
| A | chr10 | <i>ASAH2</i>     | Inf         | Inf          | 0.004482054 | 0.030805434 | Up   |
| A | chr17 | <i>TLK2</i>      | 2.011700565 | 1.008415581  | 0.001547483 | 0.014894026 | Up   |
| A | chr2  | <i>PUS10</i>     | 3.908044672 | 1.966446959  | 2.32E-08    | 4.03E-06    | Up   |
| A | chr2  | <i>GTF3C2</i>    | 0.63565979  | -0.653673264 | 0.007339252 | 0.043081663 | Down |
| A | chr2  | <i>GTF3C3</i>    | 1.792245055 | 0.841767912  | 0.002979517 | 0.023205029 | Up   |
| A | chr19 | <i>NOTCH3</i>    | 0.110594722 | -3.176645555 | 1.56E-05    | 0.000545853 | Down |
| A | chr1  | <i>GSTM1</i>     | 0.342081967 | -1.547586039 | 0.001288683 | 0.013100604 | Down |
| A | chr3  | <i>CP</i>        | 0           | #NAME?       | 0.000212363 | 0.00365696  | Down |
| A | chr1  | <i>STRIP1</i>    | 0.584636355 | -0.774388551 | 0.00407279  | 0.028923901 | Down |
| A | chr7  | <i>PPP1R9A</i>   | 2.044198199 | 1.031535082  | 0.000269269 | 0.004333878 | Up   |
| A | chr1  | <i>PADI2</i>     | 0.265233921 | -1.914662799 | 3.04E-06    | 0.000162564 | Down |
| A | chr10 | <i>ACTA2</i>     | 0.390961811 | -1.354900401 | 1.32E-06    | 9.12E-05    | Down |
| A | chr20 | <i>SPATA2</i>    | 0.21111971  | -2.24386682  | 6.16E-08    | 8.79E-06    | Down |
| A | chr11 | <i>CCDC82</i>    | 5.087499403 | 2.34695672   | 0.000378754 | 0.005582588 | Up   |
| A | chr19 | <i>ZNF836</i>    | 3.054731917 | 1.611045775  | 0.000133899 | 0.002648165 | Up   |
| A | chr6  | <i>DTNBP1</i>    | 1.846863806 | 0.885077481  | 0.008527439 | 0.047865833 | Up   |
| A | chr12 | <i>MLL2</i>      | 0.285367533 | -1.809106888 | 0.006660967 | 0.040262599 | Down |
| A | chr6  | <i>TAPBP</i>     | 0.167246122 | -2.579955333 | 1.12E-10    | 4.50E-08    | Down |
| A | chr21 | <i>RWDD2B</i>    | 3.44603173  | 1.784935986  | 0.003466233 | 0.025883719 | Up   |
| A | chr8  | <i>ZHX1</i>      | 1.900519259 | 0.926393645  | 0.000300781 | 0.004701916 | Up   |
| A | chr2  | <i>STAMBIP</i>   | 0.155026293 | -2.689415169 | 0.004665073 | 0.031665732 | Down |
| A | chr3  | <i>ATP11B</i>    | 1.78725632  | 0.837746554  | 0.000489379 | 0.006702897 | Up   |
| A | chr3  | <i>PIGX</i>      | 4.24993625  | 2.087441201  | 0.008690351 | 0.048548332 | Up   |
| A | chr11 | <i>ATM</i>       | 1.968961455 | 0.977434869  | 0.000122333 | 0.002464217 | Up   |
| A | chrX  | <i>ATRX</i>      | 1.956383416 | 0.96818914   | 4.83E-05    | 0.001272452 | Up   |
| A | chr17 | <i>LLGL1</i>     | 0.295619425 | -1.758187025 | 0.000256374 | 0.004174669 | Down |
| A | chr17 | <i>LLGL2</i>     | 0.37150671  | -1.428539826 | 0.00694256  | 0.041455275 | Down |
| A | chr2  | <i>ALMS1</i>     | 1.917430075 | 0.939173966  | 0.001690828 | 0.015798413 | Up   |
| A | chr20 | <i>RALGAPA2</i>  | 1.745655423 | 0.803768812  | 0.002097779 | 0.018382819 | Up   |
| A | chr11 | <i>PGR</i>       | 61.05951587 | 5.932144246  | 0.004310075 | 0.030005016 | Up   |
| A | chr3  | <i>GPX1</i>      | 0.437604414 | -1.192300804 | 1.83E-05    | 0.00061401  | Down |
| A | chr19 | <i>ZNF844</i>    | 2.887751081 | 1.52994639   | 0.001417039 | 0.013945603 | Up   |
| A | chr3  | <i>CPNE4</i>     | 0.014918125 | -6.066789978 | 2.56E-05    | 0.000790926 | Down |
| A | chr18 | <i>NAPG</i>      | 3.145320072 | 1.653206835  | 0.004187881 | 0.029516419 | Up   |
| A | chr14 | <i>ADCY4</i>     | 0.402365304 | -1.313422189 | 0.001794373 | 0.016405384 | Down |
| A | chr6  | <i>HLA-A</i>     | 0.56638792  | -0.820137599 | 0.002634583 | 0.02139963  | Down |
| A | chr6  | <i>HLA-B</i>     | 0.321614589 | -1.636595245 | 5.17E-07    | 4.37E-05    | Down |
| A | chr6  | <i>SOX4</i>      | 0.659638935 | -0.600251539 | 0.007302875 | 0.042958283 | Down |
| A | chr6  | <i>HLA-C</i>     | 0.557096039 | -0.844002035 | 0.003262312 | 0.024829711 | Down |
| A | chr4  | <i>HSP90AA6P</i> | 2.002173246 | 1.001566814  | 0.000628521 | 0.008003409 | Up   |
| A | chr6  | <i>HLA-E</i>     | 0.330318221 | -1.598071541 | 0.004164354 | 0.029445997 | Down |
| A | chr6  | <i>HLA-F</i>     | 0.544765385 | -0.876293058 | 0.001372191 | 0.013644476 | Down |

|   |       |                 |             |              |             |             |      |
|---|-------|-----------------|-------------|--------------|-------------|-------------|------|
| A | chr6  | <i>HLA-G</i>    | 0.439191565 | -1.187077747 | 0.002857028 | 0.022479075 | Down |
| A | chr15 | <i>CSK</i>      | 0.4997451   | -1.000735674 | 2.71E-05    | 0.000835579 | Down |
| A | chr6  | <i>HLA-H</i>    | 0.349325801 | -1.517354891 | 0.001049254 | 0.011397025 | Down |
| A | chr9  | <i>GFI1B</i>    | 0.382269873 | -1.387336589 | 0.000778762 | 0.009257905 | Down |
| A | chr5  | <i>CLK4</i>     | 2.147940595 | 1.102954094  | 3.65E-05    | 0.001054675 | Up   |
| A | chr9  | <i>RXRA</i>     | 0.307637    | -1.700699068 | 0.000303742 | 0.004731206 | Down |
| A | chr4  | <i>STAP1</i>    | 4.179639503 | 2.063378514  | 8.97E-05    | 0.002003835 | Up   |
| A | chr1  | <i>TMEM39B</i>  | 0.393325875 | -1.346202997 | 0.000158974 | 0.002972904 | Down |
| A | chr17 | <i>RHOT1</i>    | 1.687668174 | 0.755031272  | 0.005627039 | 0.035759366 | Up   |
| A | chr1  | <i>MYSM1</i>    | 2.029657403 | 1.021236227  | 0.00057875  | 0.007571291 | Up   |
| A | chr18 | <i>ALPK2</i>    | 0.033565781 | -4.896864976 | 0.005283653 | 0.034278091 | Down |
| A | chr22 | <i>RAC2</i>     | 0.421001049 | -1.248104267 | 1.70E-07    | 1.90E-05    | Down |
| A | chr19 | <i>ERF</i>      | 0.432568558 | -1.20899929  | 0.001310991 | 0.013234619 | Down |
| A | chr17 | <i>ACTG1</i>    | 0.465591102 | -1.102864607 | 9.96E-07    | 7.18E-05    | Down |
| A | chr15 | <i>TRPM1</i>    | 0           | #NAME?       | 0.007355769 | 0.043113986 | Down |
| A | chr21 | <i>CBR3-AS1</i> | 0.025986411 | -5.266098786 | 3.64E-08    | 5.86E-06    | Down |
| A | chr15 | <i>TRPM7</i>    | 1.921661653 | 0.942354343  | 0.000103817 | 0.002214253 | Up   |
| A | chr11 | <i>BCL9L</i>    | 0.254889311 | -1.972057222 | 0.000674209 | 0.008357507 | Down |
| A | chr11 | <i>FAM160A2</i> | 0.418794949 | -1.255684053 | 8.60E-05    | 0.001955516 | Down |
| A | chr8  | <i>NDRG1</i>    | 0.488382881 | -1.033915463 | 0.003353648 | 0.025303568 | Down |
| A | chr19 | <i>LPAR2</i>    | 0.17437912  | -2.519700788 | 0.000210513 | 0.003629887 | Down |
| A | chr12 | <i>ATN1</i>     | 0.18975896  | -2.397760086 | 0.0009528   | 0.010611686 | Down |
| A | chr1  | <i>TROVE2</i>   | 3.695025816 | 1.885584444  | 0.003304359 | 0.025018993 | Up   |
| A | chr6  | <i>YIPF3</i>    | 0.427636545 | -1.225542947 | 0.000713757 | 0.008690922 | Down |
| A | chr16 | <i>JMJD8</i>    | 0.149582445 | -2.740987225 | 0.002851413 | 0.02245329  | Down |
| A | chr6  | <i>TTK</i>      | 3.677999481 | 1.878921276  | 9.11E-05    | 0.002028384 | Up   |
| A | chr2  | <i>ALS2</i>     | 2.390917884 | 1.257564581  | 0.000125766 | 0.002517823 | Up   |
| A | chr1  | <i>PLEKHG5</i>  | 0.222564617 | -2.167703844 | 2.30E-05    | 0.000729494 | Down |
| A | chr1  | <i>SRRM1</i>    | 0.513811702 | -0.960688346 | 0.000117937 | 0.002412899 | Down |
| A | chr12 | <i>ADCY6</i>    | 0.471725504 | -1.083980491 | 0.000206894 | 0.003581688 | Down |
| A | chr11 | <i>TSPAN18</i>  | 0.031605263 | -4.983691391 | 0.004217686 | 0.029657303 | Down |
| A | chr10 | <i>CHST15</i>   | 0.481240337 | -1.055170523 | 0.001264947 | 0.012962241 | Down |
| A | chr8  | <i>RHOBTB2</i>  | 0.512053968 | -0.965632223 | 0.001106345 | 0.011759876 | Down |
| A | chr5  | <i>GM2A</i>     | 0.171311649 | -2.545304838 | 0.00010628  | 0.002241153 | Down |
| A | chr8  | <i>STC1</i>     | 0.031605263 | -4.983691391 | 0.001668936 | 0.015683671 | Down |
| A | chr8  | <i>CPSF1</i>    | 0.618913923 | -0.692189317 | 0.005576275 | 0.035540582 | Down |
| A | chr19 | <i>SHANK1</i>   | 0.18142103  | -2.462586396 | 0.000616336 | 0.007899307 | Down |
| A | chr19 | <i>PTBP1</i>    | 0.488727071 | -1.032899075 | 1.20E-05    | 0.000452471 | Down |
| A | chr17 | <i>KAT2A</i>    | 0.613671046 | -0.704462578 | 0.006198202 | 0.038307351 | Down |
| A | chr22 | <i>PLXNB2</i>   | 0.480140241 | -1.05847224  | 0.004327991 | 0.030071002 | Down |
| A | chr3  | <i>NKTR</i>     | 1.724391846 | 0.786087646  | 0.002829497 | 0.022357624 | Up   |
| A | chr22 | <i>MICALL1</i>  | 0.325609801 | -1.618783969 | 0.000894277 | 0.010185858 | Down |
| A | chr19 | <i>DYRK1B</i>   | 0.256832517 | -1.961100227 | 4.19E-06    | 0.000206964 | Down |
| A | chr17 | <i>SLC9A3R1</i> | 0.359069512 | -1.477664932 | 4.22E-06    | 0.000207618 | Down |

|   |       |                  |             |              |             |             |      |
|---|-------|------------------|-------------|--------------|-------------|-------------|------|
| A | chr5  | <i>GRIA1</i>     | 0.053333881 | -4.228803889 | 0.000242578 | 0.004037623 | Down |
| A | chr17 | <i>UTP18</i>     | 2.294565216 | 1.198220812  | 0.000403566 | 0.00585305  | Up   |
| A | chr4  | <i>MFSD10</i>    | 0.356635784 | -1.487476627 | 0.000311449 | 0.0047997   | Down |
| A | chr18 | <i>ESCO1</i>     | 2.066980334 | 1.047524662  | 0.000249031 | 0.004097293 | Up   |
| A | chr5  | <i>TARS</i>      | 1.809941103 | 0.855942752  | 0.003555365 | 0.026263826 | Up   |
| A | chr20 | <i>GNAS</i>      | 0.557374394 | -0.843281368 | 0.000157046 | 0.002945292 | Down |
| A | chr10 | <i>EXOC6</i>     | 1.770183527 | 0.823898942  | 0.001372497 | 0.013644476 | Up   |
| A | chr17 | <i>ENGASE</i>    | 0.201741875 | -2.309417524 | 0.000870526 | 0.010011432 | Down |
| A | chr14 | <i>MYH6</i>      | 0.077859008 | -3.682992231 | 0.001619243 | 0.015412774 | Down |
| A | chr17 | <i>DNAH2</i>     | 0.058207749 | -4.102644974 | 8.09E-08    | 1.08E-05    | Down |
| A | chr2  | <i>SIX3</i>      | 0.056093417 | -4.156024725 | 0.000115914 | 0.002386485 | Down |
| A | chr19 | <i>KDELRL1</i>   | 0.459741049 | -1.121106609 | 5.67E-05    | 0.001434457 | Down |
| A | chr1  | <i>RNU11</i>     | 0.177071183 | -2.497598653 | 2.13E-21    | 9.28E-18    | Down |
| A | chr1  | <i>VAV3</i>      | 1.668018596 | 0.738135373  | 0.003514426 | 0.026064663 | Up   |
| A | chr15 | <i>NR2F2</i>     | 0.112442704 | -3.152738042 | 0.001534167 | 0.014813909 | Down |
| A | chr17 | <i>DNAH9</i>     | 0.278204679 | -1.845781409 | 2.94E-05    | 0.000882772 | Down |
| A | chr1  | <i>LOC148709</i> | 0.142167558 | -2.81433581  | 0.001284387 | 0.013092836 | Down |
| A | chr11 | <i>RASGRP2</i>   | 0.548824329 | -0.865583659 | 0.000639921 | 0.008086043 | Down |
| A | chr19 | <i>MKNK2</i>     | 0.473537557 | -1.078449244 | 1.87E-05    | 0.00062082  | Down |
| A | chr11 | <i>KLC2</i>      | 0.383212394 | -1.383783872 | 0.001433598 | 0.014038074 | Down |
| A | chr8  | <i>SLC25A32</i>  | 3.228686122 | 1.690947196  | 0.002847362 | 0.022443606 | Up   |
| A | chr17 | <i>RPS6KB1</i>   | 2.378918321 | 1.250305738  | 1.12E-05    | 0.000433118 | Up   |
| A | chr15 | <i>LOC729739</i> | 0.025858851 | -5.273198008 | 0.001035045 | 0.011277494 | Down |
| A | chr4  | <i>RFC1</i>      | 1.749824246 | 0.807210023  | 0.002355938 | 0.019776242 | Up   |
| A | chr5  | <i>BDP1</i>      | 1.785931393 | 0.83667666   | 0.005598594 | 0.035630643 | Up   |
| A | chr4  | <i>DDX60</i>     | 3.174910616 | 1.666715976  | 0.000127169 | 0.002534263 | Up   |
| A | chr10 | <i>ZSWIM8</i>    | 0.538806041 | -0.892162068 | 0.001686644 | 0.015781719 | Down |
| A | chr19 | <i>GEMIN7</i>    | 0.260453717 | -1.940901071 | 0.001548394 | 0.014894026 | Down |
| A | chr9  | <i>TRIM32</i>    | 0.475697119 | -1.071884806 | 0.004295874 | 0.029954084 | Down |
| A | chr2  | <i>ITGA6</i>     | 1.837250598 | 0.877548421  | 0.001052096 | 0.011397025 | Up   |
| A | chr11 | <i>RAD9A</i>     | 0.434040165 | -1.204099541 | 0.004630463 | 0.031529178 | Down |
| A | chr9  | <i>FAM78A</i>    | 0.391210721 | -1.353982188 | 7.05E-05    | 0.001704356 | Down |
| A | chr19 | <i>GATAD2A</i>   | 0.470492354 | -1.087756816 | 0.000166123 | 0.003080126 | Down |
| A | chr9  | <i>ARRDC1</i>    | 0.562169253 | -0.830923544 | 0.00886169  | 0.049138333 | Down |
| A | chr15 | <i>MESDC1</i>    | 0.223816305 | -2.159612955 | 1.60E-05    | 0.000558463 | Down |
| A | chr11 | <i>GVINP1</i>    | 1.909181613 | 0.932954347  | 7.63E-05    | 0.001803113 | Up   |
| A | chr3  | <i>ITGB5</i>     | 0.358363234 | -1.480505463 | 9.01E-06    | 0.000364153 | Down |
| A | chr16 | <i>PAR6A</i>     | 0.28234402  | -1.824474018 | 8.69E-05    | 0.001966959 | Down |
| A | chr12 | <i>LARP4</i>     | 2.027580215 | 1.019758992  | 0.000104611 | 0.002221189 | Up   |
| A | chr8  | <i>FAM92A1</i>   | 3.990446847 | 1.996550307  | 0.002829602 | 0.022357624 | Up   |
| A | chr3  | <i>TOP2B</i>     | 2.210818155 | 1.144580365  | 1.67E-06    | 0.000105384 | Up   |
| A | chr2  | <i>ZNF638</i>    | 1.782881011 | 0.834210421  | 0.00060431  | 0.007794528 | Up   |
| A | chr19 | <i>ATP4A</i>     | 0.216102411 | -2.21021293  | 0.00083664  | 0.009759304 | Down |
| A | chr2  | <i>TMEM214</i>   | 0.523304904 | -0.934276315 | 0.004561459 | 0.031205827 | Down |

|   |       |                   |             |              |             |             |      |
|---|-------|-------------------|-------------|--------------|-------------|-------------|------|
| A | chr3  | <i>TMF1</i>       | 1.919717203 | 0.940893801  | 0.00154087  | 0.01486547  | Up   |
| A | chr10 | <i>KCNMA1</i>     | 0.032527859 | -4.942180302 | 9.47E-05    | 0.002076376 | Down |
| A | chr1  | <i>MTF2</i>       | 2.113488843 | 1.079626496  | 9.02E-06    | 0.000364153 | Up   |
| A | chr17 | <i>GLOD4</i>      | 2.488204349 | 1.315104975  | 0.000391012 | 0.005721842 | Up   |
| A | chr17 | <i>UTP6</i>       | 1.973537801 | 0.980784153  | 0.006818399 | 0.040844679 | Up   |
| A | chr3  | <i>SLC6A6</i>     | 0.568260954 | -0.815374507 | 0.001699899 | 0.015860463 | Down |
| A | chr10 | <i>SEMA4G</i>     | 0.295980667 | -1.756425151 | 0.004350527 | 0.030190021 | Down |
| A | chr8  | <i>FAM110B</i>    | 2.711162807 | 1.43891175   | 0.007967119 | 0.04577236  | Up   |
| A | chr7  | <i>GPR22</i>      | 3.040426439 | 1.604273685  | 3.97E-05    | 0.001122785 | Up   |
| A | chr14 | <i>SNORA28</i>    | 0.143476156 | -2.8011171   | 1.12E-17    | 1.66E-14    | Down |
| A | chr14 | <i>ZFP36L1</i>    | 0.482725611 | -1.050724724 | 0.003186542 | 0.024376932 | Down |
| A | chr2  | <i>KIAA1841</i>   | 2.712224214 | 1.439476448  | 1.20E-05    | 0.000452471 | Up   |
| A | chr4  | <i>UBA6</i>       | 1.988720474 | 0.991840511  | 0.000386874 | 0.005674002 | Up   |
| A | chr3  | <i>CCNL1</i>      | 1.881104027 | 0.911579634  | 0.000216547 | 0.003690067 | Up   |
| A | chr19 | <i>TYK2</i>       | 0.305713171 | -1.709749386 | 2.68E-07    | 2.71E-05    | Down |
| A | chr19 | <i>TMEM145</i>    | 0.111390778 | -3.166298298 | 0.000978872 | 0.010809824 | Down |
| A | chr17 | <i>ARMC7</i>      | 0.097645909 | -3.356296595 | 0.005692156 | 0.036062607 | Down |
| A | chr3  | <i>OPA1</i>       | 1.731469827 | 0.791997247  | 0.003805064 | 0.02751309  | Up   |
| A | chr1  | <i>IRF2BP2</i>    | 0.468131332 | -1.095014768 | 2.26E-06    | 0.00013031  | Down |
| A | chr2  | <i>STAT4</i>      | 1.629464173 | 0.704397632  | 0.008955336 | 0.049573365 | Up   |
| A | chr2  | <i>CPSF3</i>      | 1.665456445 | 0.735917625  | 0.005783524 | 0.036487353 | Up   |
| A | chr7  | <i>MRPS33</i>     | Inf         | Inf          | 0.002107679 | 0.018427249 | Up   |
| A | chr13 | <i>CLN5</i>       | 3.140804804 | 1.651134285  | 0.00508359  | 0.033513179 | Up   |
| A | chr12 | <i>LPAR5</i>      | 0.160266905 | -2.641451552 | 0.000839394 | 0.009782682 | Down |
| A | chr4  | <i>NAA15</i>      | 1.578322024 | 0.658391588  | 0.006192517 | 0.038307351 | Up   |
| A | chr5  | <i>IQGAP2</i>     | 1.561209644 | 0.64266428   | 0.007629003 | 0.044278068 | Up   |
| A | chr10 | <i>NDST2</i>      | 0.543933864 | -0.878496847 | 0.000867817 | 0.009989112 | Down |
| A | chr18 | <i>SMCHD1</i>     | 1.797649135 | 0.846111463  | 0.000583682 | 0.007613953 | Up   |
| A | chr1  | <i>LYPLA2</i>     | 0.443030783 | -1.174521149 | 0.000692966 | 0.008501209 | Down |
| A | chr18 | <i>NDC80</i>      | 1.930991272 | 0.949341643  | 0.005747447 | 0.036317269 | Up   |
| A | chr9  | <i>SNORA65</i>    | 0.374937866 | -1.415276561 | 0.000147455 | 0.002820645 | Down |
| A | chr18 | <i>RPRD1A</i>     | 2.570305564 | 1.361939881  | 0.00062612  | 0.007981196 | Up   |
| A | chr14 | <i>EIF5</i>       | 1.68090693  | 0.749239846  | 0.006404556 | 0.039154185 | Up   |
| A | chr1  | <i>SHCBP1L</i>    | Inf         | Inf          | 0.003325183 | 0.025126699 | Up   |
| A | chrX  | <i>RP2</i>        | 2.16836079  | 1.116604824  | 0.000900145 | 0.010208926 | Up   |
| A | chrX  | <i>MID1</i>       | 0.152294872 | -2.715060726 | 1.37E-07    | 1.63E-05    | Down |
| A | chr8  | <i>SYBU</i>       | 0.109533315 | -3.190558362 | 0.002223994 | 0.019111122 | Down |
| A | chr10 | <i>SKIDA1</i>     | 0.251810005 | -1.989592491 | 0.001260321 | 0.012962241 | Down |
| A | chr17 | <i>MLLT6</i>      | 0.50412179  | -0.988155781 | 0.0006952   | 0.008513715 | Down |
| A | chr2  | <i>MITD1</i>      | 3.352190882 | 1.745104302  | 0.001944921 | 0.017352733 | Up   |
| A | chr7  | <i>LHFPL3-AS2</i> | 0.299329046 | -1.740195816 | 4.05E-06    | 0.000203272 | Down |
| A | chr6  | <i>PRRC2A</i>     | 0.243101915 | -2.040366838 | 0.001024003 | 0.011194569 | Down |
| A | chr11 | <i>PCNXL3</i>     | 0.273987956 | -1.867815616 | 3.22E-05    | 0.000947677 | Down |
| A | chr17 | <i>GOSR1</i>      | 2.78276635  | 1.476519781  | 0.000895704 | 0.010193217 | Up   |

|   |       |                  |             |              |             |             |      |
|---|-------|------------------|-------------|--------------|-------------|-------------|------|
| A | chr1  | <i>GOLPH3L</i>   | 1.874308081 | 0.906358109  | 0.001855569 | 0.016831651 | Up   |
| A | chr2  | <i>UGP2</i>      | 2.015259732 | 1.010965789  | 0.000509243 | 0.006911658 | Up   |
| A | chr3  | <i>TBC1D23</i>   | 2.202576848 | 1.139192356  | 0.000815332 | 0.00960517  | Up   |
| A | chr10 | <i>PPRC1</i>     | 0.289404826 | -1.788839113 | 0.00032443  | 0.004952958 | Down |
| A | chr14 | <i>TMED10</i>    | 0.549977291 | -0.862556046 | 0.001577905 | 0.0151      | Down |
| A | chr19 | <i>ACTN4</i>     | 0.519461804 | -0.944910424 | 0.006526779 | 0.039715429 | Down |
| A | chr22 | <i>SH3BP1</i>    | 0.32120395  | -1.638438459 | 6.02E-05    | 0.001506362 | Down |
| A | chr1  | <i>BCL9</i>      | 0.318723265 | -1.649623762 | 0.008710187 | 0.048607985 | Down |
| A | chr9  | <i>NAIF1</i>     | 0.295098641 | -1.760730819 | 0.00509766  | 0.033549428 | Down |
| A | chr6  | <i>CUL9</i>      | 0.275909226 | -1.857734397 | 6.26E-07    | 4.97E-05    | Down |
| A | chrX  | <i>ABCD1</i>     | 0.490813205 | -1.026754032 | 0.001679452 | 0.015737931 | Down |
| A | chr8  | <i>RAD54B</i>    | 4.054432005 | 2.019499818  | 1.31E-05    | 0.000476915 | Up   |
| A | chr6  | <i>ABRACL</i>    | 2.678997154 | 1.421693049  | 0.00149872  | 0.014555297 | Up   |
| A | chr2  | <i>7-Mar</i>     | 2.96469576  | 1.567884061  | 7.47E-07    | 5.70E-05    | Up   |
| A | chr3  | <i>PDCD10</i>    | 2.152893094 | 1.106276682  | 0.007224566 | 0.042633116 | Up   |
| A | chr19 | <i>TMEM160</i>   | 0.234714246 | -2.091022688 | 0.006458331 | 0.039337654 | Down |
| A | chr10 | <i>VPS26A</i>    | 1.793564849 | 0.842829909  | 0.008001847 | 0.045891085 | Up   |
| A | chr1  | <i>RNASEL</i>    | 5.549637505 | 2.47239354   | 0.001715852 | 0.015948418 | Up   |
| A | chr14 | <i>MBIP</i>      | 2.135614118 | 1.094650991  | 0.002493738 | 0.020562707 | Up   |
| A | chr16 | <i>SNX29</i>     | 0.501306953 | -0.99623385  | 0.002929577 | 0.022953044 | Down |
| A | chr2  | <i>SNORA75</i>   | 0.349665468 | -1.515952768 | 0.005135781 | 0.033653289 | Down |
| A | chr1  | <i>DNM3</i>      | 0.19433682  | -2.363368831 | 0.002016663 | 0.017822278 | Down |
| A | chrX  | <i>ZNF449</i>    | 4.473009199 | 2.161245725  | 0.000632283 | 0.008036218 | Up   |
| A | chr8  | <i>YTHDF3</i>    | 1.69782731  | 0.763689726  | 0.001469971 | 0.014319055 | Up   |
| A | chr1  | <i>MIER1</i>     | 1.989709933 | 0.992558125  | 0.000173823 | 0.003173305 | Up   |
| A | chr5  | <i>PAIP2</i>     | 1.779543732 | 0.831507387  | 0.002229127 | 0.019117077 | Up   |
| A | chr2  | <i>ADI1</i>      | 0.329509722 | -1.601607064 | 8.72E-05    | 0.00196959  | Down |
| A | chr1  | <i>PLEKHM2</i>   | 0.462739604 | -1.111727517 | 0.00065557  | 0.008196179 | Down |
| A | chr15 | <i>SCARNA14</i>  | 0.180776299 | -2.467722548 | 0.000142553 | 0.002783797 | Down |
| A | chr5  | <i>OXCT1</i>     | 2.825341997 | 1.498425511  | 5.56E-07    | 4.61E-05    | Up   |
| A | chr1  | <i>HIST2H3D</i>  | 0.304529434 | -1.715346417 | 1.82E-07    | 1.99E-05    | Down |
| A | chr6  | <i>MYO6</i>      | 5.503200922 | 2.460271002  | 0.008323187 | 0.047135271 | Up   |
| A | chr10 | <i>GLRX3</i>     | 1.814455409 | 0.859536603  | 0.001667517 | 0.015683671 | Up   |
| A | chrX  | <i>TXLNG</i>     | 2.325276025 | 1.217401984  | 7.61E-05    | 0.001803113 | Up   |
| A | chr11 | <i>CD6</i>       | 0.021880566 | -5.514206108 | 0.000237384 | 0.003967447 | Down |
| A | chr15 | <i>BNIP2</i>     | 2.266613709 | 1.180538539  | 0.001061162 | 0.011447393 | Up   |
| A | chr5  | <i>YTHDC2</i>    | 1.71277844  | 0.776338541  | 0.00552191  | 0.035280223 | Up   |
| A | chr19 | <i>STK11</i>     | 0.52149162  | -0.939284026 | 0.002722755 | 0.021882542 | Down |
| A | chr17 | <i>ATAD5</i>     | 3.392939299 | 1.76253562   | 2.89E-07    | 2.83E-05    | Up   |
| A | chr14 | <i>NEMF</i>      | 1.937551043 | 0.954234317  | 0.000477121 | 0.006597309 | Up   |
| A | chr19 | <i>RNF126</i>    | 0.422669974 | -1.242396467 | 0.002311521 | 0.019516357 | Down |
| A | chr11 | <i>TAF1D</i>     | 2.599680272 | 1.378334201  | 0.006745076 | 0.04057787  | Up   |
| A | chr2  | <i>MPHOSPH10</i> | 2.985279041 | 1.57786579   | 1.01E-05    | 0.000399047 | Up   |
| A | chr18 | <i>CEP192</i>    | 1.70321303  | 0.768258892  | 0.007257994 | 0.042790691 | Up   |

|   |       |                 |             |              |             |             |      |
|---|-------|-----------------|-------------|--------------|-------------|-------------|------|
| A | chr18 | <i>RIOK3</i>    | 2.468604265 | 1.303695581  | 5.33E-06    | 0.000247695 | Up   |
| A | chr2  | <i>RPS7</i>     | 4.812462529 | 2.266775308  | 0.003039541 | 0.023532108 | Up   |
| A | chrX  | <i>ZNF280C</i>  | 2.524438905 | 1.335962762  | 7.73E-05    | 0.001814448 | Up   |
| A | chr19 | <i>POLRMT</i>   | 0.211899355 | -2.2385489   | 0.007298208 | 0.042958283 | Down |
| A | chr2  | <i>UBXN4</i>    | 2.168049376 | 1.116397614  | 0.00167231  | 0.015692788 | Up   |
| A | chr3  | <i>GATA2</i>    | 0.398722294 | -1.326543819 | 0.001721531 | 0.01598232  | Down |
| A | chr18 | <i>SMAD2</i>    | 1.738347451 | 0.797716469  | 0.002787788 | 0.02216139  | Up   |
| A | chr3  | <i>NT5DC2</i>   | 0.515358831 | -0.956350802 | 0.00213933  | 0.01862887  | Down |
| A | chr18 | <i>SMAD7</i>    | 0.364502862 | -1.455997951 | 2.08E-07    | 2.23E-05    | Down |
| A | chr16 | <i>SOLH</i>     | 0.375419682 | -1.413423807 | 0.002859061 | 0.02248152  | Down |
| A | chr1  | <i>CAPZB</i>    | 0.510531073 | -0.969929322 | 5.85E-05    | 0.001475099 | Down |
| A | chr4  | <i>SPATA5</i>   | 2.30511669  | 1.204839785  | 0.001076798 | 0.011539772 | Up   |
| A | chr15 | <i>ZNF710</i>   | 0.358435524 | -1.480214468 | 5.23E-07    | 4.38E-05    | Down |
| A | chr7  | <i>TNS3</i>     | 0.482381038 | -1.051754897 | 0.00449812  | 0.030853369 | Down |
| A | chr11 | <i>CREBZF</i>   | 1.721700998 | 0.783834617  | 0.008830961 | 0.049028886 | Up   |
| A | chr14 | <i>ZFH2</i>     | 0.207741617 | -2.267137833 | 0.000828673 | 0.009701048 | Down |
| A | chr2  | <i>SCN9A</i>    | 0           | #NAME?       | 0.00091782  | 0.010363585 | Down |
| A | chr9  | <i>UBAP2</i>    | 0.360941753 | -1.470162055 | 7.23E-07    | 5.56E-05    | Down |
| A | chr14 | <i>ACTN1</i>    | 0.568003065 | -0.816029379 | 0.005520632 | 0.035280223 | Down |
| A | chr1  | <i>ARL8A</i>    | 0.465377772 | -1.103525789 | 0.002450196 | 0.020319196 | Down |
| A | chr20 | <i>SLC35C2</i>  | 0.476216248 | -1.07031125  | 0.000649784 | 0.008163269 | Down |
| A | chr6  | <i>HMG3</i>     | 2.351767514 | 1.233745448  | 0.003856127 | 0.027747536 | Up   |
| A | chr1  | <i>CYP2J2</i>   | 3.460171984 | 1.790843747  | 0.000168658 | 0.003108893 | Up   |
| A | chr2  | <i>MTIF2</i>    | 3.350714448 | 1.744468744  | 2.02E-06    | 0.000119099 | Up   |
| A | chr17 | <i>EPX</i>      | 0.289395525 | -1.788885482 | 1.81E-05    | 0.00060904  | Down |
| A | chr18 | <i>PIGN</i>     | 2.085779874 | 1.060586909  | 0.000257853 | 0.004186257 | Up   |
| A | chr11 | <i>EIF3M</i>    | 1.991161085 | 0.99360994   | 0.000965655 | 0.010727396 | Up   |
| A | chr3  | <i>NMD3</i>     | 2.173866757 | 1.120263516  | 0.000406521 | 0.005876327 | Up   |
| A | chr19 | <i>JUNB</i>     | 0.435087722 | -1.20062179  | 0.000115455 | 0.002380771 | Down |
| A | chr19 | <i>JUND</i>     | 0.42436167  | -1.236633741 | 0.000313943 | 0.004821057 | Down |
| A | chr10 | <i>HNRNPF</i>   | 1.853642107 | 0.890362721  | 0.003876821 | 0.027865719 | Up   |
| A | chr3  | <i>FAM208A</i>  | 2.098149338 | 1.069117367  | 3.02E-05    | 0.000904362 | Up   |
| A | chr14 | <i>JPH4</i>     | 0.043761133 | -4.514206108 | 0.001346115 | 0.013505644 | Down |
| A | chr14 | <i>ANGEL1</i>   | 0.278152969 | -1.846049591 | 0.000213002 | 0.003663135 | Down |
| A | chr3  | <i>CCDC14</i>   | 7.038472708 | 2.81526241   | 0.007338262 | 0.043081663 | Up   |
| T | chr5  | <i>PRELID1</i>  | 0.31573499  | -1.663213944 | 0.003437469 | 0.024136285 | Down |
| T | chr8  | <i>MTDH</i>     | 1.768891202 | 0.822845316  | 0.000653404 | 0.007570473 | Up   |
| T | chr12 | <i>PXN</i>      | 0.313121658 | -1.675204797 | 1.26E-09    | 2.89E-07    | Down |
| T | chr12 | <i>PIP4K2C</i>  | 0.569549011 | -0.812108101 | 0.00969981  | 0.049508499 | Down |
| T | chr12 | <i>CACNA1C</i>  | 0.11022118  | -3.181526613 | 0.005669342 | 0.034099694 | Down |
| T | chr19 | <i>RAB11B</i>   | 0.367431369 | -1.444453295 | 0.000152868 | 0.002651748 | Down |
| T | chr7  | <i>TMEM178B</i> | 0.066003884 | -3.921305268 | 0.001915861 | 0.016161955 | Down |
| T | chr7  | <i>C7orf26</i>  | 0.46299337  | -1.110936562 | 0.008771331 | 0.046234658 | Down |
| T | chr11 | <i>PPP6R3</i>   | 1.584688646 | 0.664199413  | 0.006074502 | 0.035826378 | Up   |

|   |       |                 |             |              |             |             |      |
|---|-------|-----------------|-------------|--------------|-------------|-------------|------|
| T | chr5  | <i>CAMK2A</i>   | 0.396097798 | -1.336071415 | 0.001271448 | 0.012250596 | Down |
| T | chr12 | <i>FOXJ2</i>    | 0.38645246  | -1.371637145 | 0.000612789 | 0.007254488 | Down |
| T | chr20 | <i>SLC9A8</i>   | 0.54496889  | -0.875754219 | 0.002872446 | 0.02133071  | Down |
| T | chr3  | <i>ETV5</i>     | 0.491786844 | -1.023894955 | 0.006309668 | 0.036653079 | Down |
| T | chr1  | <i>MAP7D1</i>   | 0.373875283 | -1.419370996 | 1.03E-05    | 0.00036955  | Down |
| T | chr4  | <i>G3BP2</i>    | 1.553806519 | 0.635806869  | 0.009166599 | 0.04760647  | Up   |
| T | chr7  | <i>SNORA9</i>   | 0.232833272 | -2.102630863 | 6.32E-15    | 8.25E-12    | Down |
| T | chr8  | <i>ELP3</i>     | 1.744435401 | 0.802760173  | 0.00567649  | 0.034126953 | Up   |
| T | chr16 | <i>1-Sep</i>    | 0.56141805  | -0.832852646 | 0.003305453 | 0.023487442 | Down |
| T | chr7  | <i>TFEC</i>     | 4.712845146 | 2.236598278  | 0.000749987 | 0.008327087 | Up   |
| T | chr2  | <i>CEBPZ</i>    | 2.123435114 | 1.086400024  | 7.60E-05    | 0.001606122 | Up   |
| T | chr16 | <i>SLC7A5</i>   | 0.336457551 | -1.571503594 | 2.36E-05    | 0.000670606 | Down |
| T | chr8  | <i>NACAP1</i>   | 2.372403839 | 1.246349611  | 0.0006378   | 0.007449186 | Up   |
| T | chr3  | <i>RBM5</i>     | 1.631990678 | 0.706632817  | 0.00351466  | 0.024519919 | Up   |
| T | chr20 | <i>KIF16B</i>   | 1.795621323 | 0.844483134  | 0.002381847 | 0.018775575 | Up   |
| T | chr3  | <i>RBM6</i>     | 2.00141485  | 1.001020238  | 5.46E-05    | 0.001266978 | Up   |
| T | chr5  | <i>DBN1</i>     | 0.11022118  | -3.181526613 | 2.25E-05    | 0.000650934 | Down |
| T | chr22 | <i>ELFN2</i>    | 0.082117836 | -3.606160578 | 0.002512729 | 0.019489332 | Down |
| T | chr4  | <i>MAB21L2</i>  | 0.286365729 | -1.804069245 | 0.00652191  | 0.03756505  | Down |
| T | chr12 | <i>SMARCC2</i>  | 0.588583618 | -0.764680708 | 0.006066599 | 0.035796644 | Down |
| T | chr15 | <i>ANXA2</i>    | 3.787752603 | 1.921342104  | 0.006856494 | 0.038840563 | Up   |
| T | chr10 | <i>ATP5C1</i>   | 1.865325322 | 0.899427266  | 0.005942651 | 0.03526888  | Up   |
| T | chr9  | <i>AQP3</i>     | 0.028322564 | -5.141904319 | 0.002187931 | 0.017751085 | Down |
| T | chr17 | <i>LIMD2</i>    | 0.536810862 | -0.89751423  | 0.000755793 | 0.008363084 | Down |
| T | chr12 | <i>TRPV4</i>    | 0.212617306 | -2.233669066 | 0.002517095 | 0.01949111  | Down |
| T | chr6  | <i>PPT2</i>     | 0.368633094 | -1.439742501 | 0.000762157 | 0.008410043 | Down |
| T | chr6  | <i>PNISR</i>    | 1.731458428 | 0.791987749  | 0.001231484 | 0.011971644 | Up   |
| T | chr14 | <i>FBXO33</i>   | 2.201526737 | 1.138504366  | 5.15E-05    | 0.00121234  | Up   |
| T | chr3  | <i>THRB</i>     | Inf         | Inf          | 0.001801838 | 0.015606735 | Up   |
| T | chr1  | <i>MINOS1</i>   | 0.490077978 | -1.028916777 | 0.009537647 | 0.049006119 | Down |
| T | chr10 | <i>ATAD1</i>    | 2.095722611 | 1.067447775  | 0.000323946 | 0.004593695 | Up   |
| T | chr1  | <i>PKN2</i>     | 1.876865653 | 0.908325385  | 0.000362516 | 0.004970198 | Up   |
| T | chr3  | <i>GMPS</i>     | 1.73590935  | 0.795691612  | 0.004938865 | 0.030814172 | Up   |
| T | chr7  | <i>DMTF1</i>    | 1.608292343 | 0.685529673  | 0.008793665 | 0.046314959 | Up   |
| T | chr17 | <i>EPN3</i>     | 0.077243356 | -3.694445342 | 0.009142707 | 0.047501296 | Down |
| T | chr3  | <i>HPS3</i>     | 2.045145237 | 1.0322033    | 0.004558527 | 0.02923822  | Up   |
| T | chr19 | <i>SLC35E1</i>  | 0.447458904 | -1.160172907 | 0.004690589 | 0.029806829 | Down |
| T | chr8  | <i>NBN</i>      | 4.011917141 | 2.00429181   | 0.000122538 | 0.002270786 | Up   |
| T | chr6  | <i>POU3F2</i>   | 0.043573175 | -4.520415942 | 0.00030131  | 0.004334358 | Down |
| T | chr12 | <i>CORO1C</i>   | 0.570652923 | -0.809314544 | 0.001939343 | 0.016318012 | Down |
| T | chr9  | <i>ADAMTSL1</i> | 0           | #NAME?       | 0.000231457 | 0.003573473 | Down |
| T | chr10 | <i>FAM213A</i>  | 5.09424369  | 2.348867974  | 0.003945243 | 0.026469577 | Up   |
| T | chr7  | <i>SLC4A2</i>   | 0.51184088  | -0.966232717 | 0.001156936 | 0.011472639 | Down |
| T | chr7  | <i>C7orf43</i>  | 0.567729808 | -0.816723604 | 0.002729368 | 0.020582278 | Down |

|   |       |                 |             |              |             |             |      |
|---|-------|-----------------|-------------|--------------|-------------|-------------|------|
| T | chr19 | <i>TGFB1</i>    | 0.140967206 | -2.826568515 | 6.34E-14    | 5.91E-11    | Down |
| T | chr16 | <i>SHCBP1</i>   | 3.857218552 | 1.947560892  | 0.001397198 | 0.013132455 | Up   |
| T | chr6  | <i>NOL7</i>     | 2.634435437 | 1.397493824  | 0.000696102 | 0.007959111 | Up   |
| T | chr5  | <i>IPO11</i>    | 1.849755321 | 0.887334449  | 0.000723688 | 0.008131986 | Up   |
| T | chr5  | <i>GNPDA1</i>   | 0.452892308 | -1.142760058 | 0.003988118 | 0.02660813  | Down |
| T | chr19 | <i>NR2C2AP</i>  | 0.39778833  | -1.329927144 | 0.009758913 | 0.049734058 | Down |
| T | chr7  | <i>PARP12</i>   | 2.257894863 | 1.17497831   | 0.003577168 | 0.024796882 | Up   |
| T | chr15 | <i>CTSH</i>     | 5.919168859 | 2.565394614  | 0.003027593 | 0.02202899  | Up   |
| T | chr11 | <i>TAF6L</i>    | 0.445140362 | -1.167667776 | 0.004725632 | 0.029942007 | Down |
| T | chr12 | <i>BTBD11</i>   | 0.335257439 | -1.576658749 | 0.001808901 | 0.015638786 | Down |
| T | chr1  | <i>TAS1R1</i>   | 0.267446508 | -1.90267773  | 0.002685256 | 0.02034111  | Down |
| T | chr12 | <i>YAF2</i>     | 2.655381964 | 1.4089194    | 0.001301192 | 0.012500259 | Up   |
| T | chr7  | <i>CDK13</i>    | 1.707728046 | 0.772078245  | 0.00148867  | 0.013705853 | Up   |
| T | chr17 | <i>TNFAIP1</i>  | 0.494589598 | -1.015696197 | 0.008810755 | 0.04636753  | Down |
| T | chr3  | <i>RSRC1</i>    | 2.440941748 | 1.287437867  | 0.002870321 | 0.02133071  | Up   |
| T | chr19 | <i>RPL28</i>    | 0.514219117 | -0.959544849 | 2.18E-05    | 0.000637285 | Down |
| T | chr19 | <i>PDE4A</i>    | 0.399872466 | -1.32238815  | 0.00462235  | 0.029496186 | Down |
| T | chr16 | <i>RPL13</i>    | 0.466679484 | -1.09949605  | 0.000165052 | 0.002796445 | Down |
| T | chr9  | <i>ZNF484</i>   | 4.069019675 | 2.024681256  | 0.002517212 | 0.01949111  | Up   |
| T | chr8  | <i>OTUD6B</i>   | 3.156655755 | 1.658396938  | 0.002373289 | 0.018742089 | Up   |
| T | chr3  | <i>SETD2</i>    | 1.675018014 | 0.744176611  | 0.001776552 | 0.015451265 | Up   |
| T | chr20 | <i>SNORA71D</i> | 0.121456473 | -3.041488715 | 0.001405292 | 0.013189523 | Down |
| T | chr10 | <i>POLL</i>     | 0.418088597 | -1.2581194   | 0.002195629 | 0.017780368 | Down |
| T | chr3  | <i>NUP210</i>   | 0.569769477 | -0.811549756 | 0.001476876 | 0.013647734 | Down |
| T | chr13 | <i>SUGT1</i>    | 1.991202743 | 0.993640123  | 0.003684494 | 0.025259721 | Up   |
| T | chr18 | <i>LOXHD1</i>   | 0.051495571 | -4.279407843 | 0.004009003 | 0.02668161  | Down |
| T | chr8  | <i>GRINA</i>    | 0.457475866 | -1.128232459 | 0.000152531 | 0.00264969  | Down |
| T | chr6  | <i>PHF1</i>     | 0.365444956 | -1.452273972 | 3.28E-05    | 0.000855333 | Down |
| T | chr17 | <i>RPL23</i>    | 1.843618649 | 0.882540266  | 0.003503349 | 0.024480284 | Up   |
| T | chr2  | <i>SAP130</i>   | 0.343204156 | -1.542861074 | 1.28E-05    | 0.000430075 | Down |
| T | chr1  | <i>H6PD</i>     | 0.369630281 | -1.435845144 | 2.76E-05    | 0.000747777 | Down |
| T | chr12 | <i>FOXM1</i>    | 0.534214446 | -0.904509106 | 0.009457651 | 0.048733941 | Down |
| T | chr6  | <i>NEU1</i>     | 0.407432503 | -1.295367017 | 0.005486321 | 0.033182452 | Down |
| T | chr22 | <i>ZDHHC8</i>   | 0.250631806 | -1.996358587 | 7.10E-06    | 0.000285103 | Down |
| T | chr1  | <i>TTF2</i>     | 2.36948264  | 1.244572091  | 0.001652713 | 0.014724931 | Up   |
| T | chr12 | <i>PPP1R12A</i> | 1.941490963 | 0.957164992  | 0.000103475 | 0.002011824 | Up   |
| T | chr4  | <i>IL15</i>     | 16.25345585 | 4.022674595  | 3.25E-06    | 0.000159432 | Up   |
| T | chr12 | <i>ORAI1</i>    | 0.25540432  | -1.969145167 | 1.22E-05    | 0.00041736  | Down |
| T | chr8  | <i>INTS9</i>    | 0.478230662 | -1.064221464 | 0.000183877 | 0.00302504  | Down |
| T | chr1  | <i>ZCCHC11</i>  | 1.567984926 | 0.64891169   | 0.006879753 | 0.03892162  | Up   |
| T | chr14 | <i>RIN3</i>     | 0.226962102 | -2.139476681 | 0.000262954 | 0.003920574 | Down |
| T | chr11 | <i>DPAGT1</i>   | 0.361718433 | -1.467060977 | 9.54E-06    | 0.000349587 | Down |
| T | chr13 | <i>TPP2</i>     | 1.899597371 | 0.925693664  | 0.000207933 | 0.003288108 | Up   |
| T | chr6  | <i>CUTA</i>     | 0.338860968 | -1.561234629 | 0.001839081 | 0.015745665 | Down |

|   |       |                 |             |              |             |             |      |
|---|-------|-----------------|-------------|--------------|-------------|-------------|------|
| T | chr5  | <i>TCF7</i>     | 0.125111838 | -2.998709794 | 1.21E-08    | 1.83E-06    | Down |
| T | chr1  | <i>SNORD21</i>  | 0.338326875 | -1.563510315 | 0.000329926 | 0.004653212 | Down |
| T | chr1  | <i>PTGER3</i>   | Inf         | Inf          | 0.000772127 | 0.008491096 | Up   |
| T | chr1  | <i>GRIK3</i>    | 0.015734758 | -5.989901226 | 2.15E-05    | 0.000628517 | Down |
| T | chr17 | <i>IGFBP4</i>   | 0.301169106 | -1.73135431  | 1.37E-10    | 4.05E-08    | Down |
| T | chr19 | <i>FKBP8</i>    | 0.469800491 | -1.089879875 | 0.001706674 | 0.015054274 | Down |
| T | chr19 | <i>NKPD1</i>    | 0.037763419 | -4.72686682  | 0.00026396  | 0.003925002 | Down |
| T | chr1  | <i>CTNNBIP1</i> | 12.38804185 | 3.630876256  | 0.00569684  | 0.034202013 | Up   |
| T | chr7  | <i>INTS1</i>    | 0.344274243 | -1.538369847 | 7.27E-07    | 5.10E-05    | Down |
| T | chr1  | <i>LRRC47</i>   | 0.359497617 | -1.475945886 | 0.002901421 | 0.021421581 | Down |
| T | chr7  | <i>C7orf60</i>  | 2.107348912 | 1.0754292    | 0.000421191 | 0.005539172 | Up   |
| T | chr21 | <i>LTN1</i>     | 1.632051022 | 0.706686161  | 0.00763281  | 0.041691444 | Up   |
| T | chr2  | <i>PCBP1</i>    | 0.36699771  | -1.446157034 | 2.21E-09    | 4.64E-07    | Down |
| T | chr19 | <i>UBA52</i>    | 0.314337834 | -1.669612168 | 3.15E-12    | 1.78E-09    | Down |
| T | chr12 | <i>BAZ2A</i>    | 0.399884289 | -1.322345493 | 0.000258439 | 0.003875397 | Down |
| T | chr3  | <i>WDR6</i>     | 0.57351988  | -0.802084599 | 0.007476398 | 0.041092665 | Down |
| T | chr12 | <i>GLTP</i>     | 0.321269786 | -1.638142787 | 0.000156941 | 0.002694023 | Down |
| T | chr18 | <i>RBBP8</i>    | 2.234022262 | 1.159643562  | 0.000478502 | 0.006037266 | Up   |
| T | chr4  | <i>GK2</i>      | 7.301802754 | 2.868252697  | 0.005629151 | 0.033889206 | Up   |
| T | chr11 | <i>PLA2G16</i>  | 2.895550891 | 1.533837853  | 0.000167386 | 0.002818606 | Up   |
| T | chr4  | <i>INPP4B</i>   | 2.271510487 | 1.183651966  | 0.002913185 | 0.021471982 | Up   |
| T | chr13 | <i>SLC7A1</i>   | 0.479300738 | -1.060996935 | 0.003839055 | 0.02604488  | Down |
| T | chr19 | <i>SLC27A1</i>  | 0.257283795 | -1.958567505 | 5.42E-06    | 0.000234827 | Down |
| T | chr3  | <i>CCDC66</i>   | 3.606296693 | 1.850518094  | 0.002981858 | 0.021814929 | Up   |
| T | chr2  | <i>ANKRD39</i>  | 0.02697387  | -5.212293647 | 9.17E-07    | 6.05E-05    | Down |
| T | chr22 | <i>TRABD</i>    | 0.481144225 | -1.055458682 | 0.002394542 | 0.018807462 | Down |
| T | chr17 | <i>COG1</i>     | 0.571107246 | -0.808166407 | 0.008174558 | 0.043868893 | Down |
| T | chr19 | <i>DPP9</i>     | 0.417128885 | -1.261434878 | 0.000157847 | 0.002702457 | Down |
| T | chr1  | <i>ZMYM1</i>    | 3.980920713 | 1.993102138  | 0.003138075 | 0.022630916 | Up   |
| T | chr8  | <i>EPPK1</i>    | 0.376909327 | -1.407710597 | 0.005239084 | 0.032058675 | Down |
| T | chr19 | <i>HSPBP1</i>   | 0.495406542 | -1.013315175 | 0.004936863 | 0.030814172 | Down |
| T | chr7  | <i>GALNT11</i>  | 2.133910005 | 1.093499334  | 0.002401483 | 0.018850627 | Up   |
| T | chr2  | <i>IFIH1</i>    | 2.515023999 | 1.330572166  | 2.64E-05    | 0.000722397 | Up   |
| T | chr1  | <i>ZMYM6</i>    | 1.969688917 | 0.977967795  | 0.005709616 | 0.034246382 | Up   |
| T | chr12 | <i>MDM2</i>     | 2.403033851 | 1.264856971  | 0.000670434 | 0.007719757 | Up   |
| T | chr1  | <i>LRRC52</i>   | 0           | #NAME?       | 0.000902776 | 0.009521113 | Down |
| T | chrX  | <i>SNORA69</i>  | 0.184613839 | -2.437417392 | 0.000935624 | 0.009757116 | Down |
| T | chr3  | <i>IQCB1</i>    | 2.934453764 | 1.553091977  | 0.000228289 | 0.003533426 | Up   |
| T | chr1  | <i>IPO13</i>    | 0.377744506 | -1.404517322 | 8.91E-05    | 0.001796994 | Down |
| T | chr3  | <i>TMEM115</i>  | 0.321377615 | -1.63765865  | 1.21E-05    | 0.000416725 | Down |
| T | chr19 | <i>ZNF507</i>   | 2.234317606 | 1.159834278  | 0.001990966 | 0.01665009  | Up   |
| T | chr11 | <i>TMEM41B</i>  | 2.661465257 | 1.412220733  | 0.003442411 | 0.024141197 | Up   |
| T | chr16 | <i>EDC4</i>     | 0.634430964 | -0.656464911 | 0.009759251 | 0.049734058 | Down |
| T | chr1  | <i>RNPC3</i>    | 2.87700268  | 1.524566565  | 0.000103215 | 0.002009767 | Up   |

|   |       |                 |             |              |             |             |      |
|---|-------|-----------------|-------------|--------------|-------------|-------------|------|
| T | chr4  | <i>SLC4A4</i>   | 0.104894227 | -3.252992821 | 0.0002444   | 0.003716128 | Down |
| T | chr10 | <i>WAPAL</i>    | 2.129781567 | 1.090705473  | 6.02E-06    | 0.000250317 | Up   |
| T | chr16 | <i>RNF166</i>   | 0.398055129 | -1.328959844 | 0.000197995 | 0.003181081 | Down |
| T | chr15 | <i>MEIS2</i>    | 0.05946464  | -4.071824151 | 3.45E-06    | 0.000167384 | Down |
| T | chr6  | <i>TUBB2B</i>   | 0.129134452 | -2.953054144 | 0.000917182 | 0.009626349 | Down |
| T | chr5  | <i>CDK7</i>     | 2.797460715 | 1.484117871  | 0.000339185 | 0.004727567 | Up   |
| T | chr1  | <i>RPS6KA1</i>  | 0.610604658 | -0.711689499 | 0.0021596   | 0.017595063 | Down |
| T | chr17 | <i>SLC38A10</i> | 0.535215014 | -0.901809508 | 0.004852462 | 0.030435202 | Down |
| T | chr3  | <i>ACAA1</i>    | 0.377934896 | -1.403790362 | 6.12E-05    | 0.001365873 | Down |
| T | chr17 | <i>SLC52A1</i>  | 0.157448816 | -2.667045183 | 0.000614667 | 0.007263894 | Down |
| T | chr3  | <i>CHMP2B</i>   | 2.942704632 | 1.557142742  | 1.87E-05    | 0.000565874 | Up   |
| T | chr10 | <i>MCMBP</i>    | 0.596811083 | -0.744653767 | 0.003602388 | 0.02489235  | Down |
| T | chr22 | <i>MED15</i>    | 0.348513503 | -1.520713539 | 6.49E-05    | 0.001427769 | Down |
| T | chr15 | <i>SCAPER</i>   | 2.04515693  | 1.032211549  | 0.000308221 | 0.004404225 | Up   |
| T | chr3  | <i>ZNF445</i>   | 2.010292018 | 1.007405085  | 0.001209632 | 0.011812021 | Up   |
| T | chr2  | <i>SLC39A10</i> | 2.087574707 | 1.061827827  | 0.000217575 | 0.003405887 | Up   |
| T | chr6  | <i>ANKS1A</i>   | 0.54976555  | -0.863111589 | 0.000576952 | 0.006884939 | Down |
| T | chr12 | <i>DNM1L</i>    | 2.17124058  | 1.11851959   | 1.38E-05    | 0.000454026 | Up   |
| T | chr9  | <i>RPS6</i>     | 1.851475709 | 0.888675622  | 0.000512804 | 0.006341273 | Up   |
| T | chr9  | <i>ATP8B5P</i>  | 2.188434109 | 1.129898947  | 0.003163929 | 0.022730093 | Up   |
| T | chr3  | <i>PLXND1</i>   | 0.473922819 | -1.077275968 | 0.000397171 | 0.005303473 | Down |
| T | chrX  | <i>OGT</i>      | 1.606708265 | 0.684107998  | 0.003550524 | 0.024690904 | Up   |
| T | chr14 | <i>ATXN3</i>    | 1.885983755 | 0.91531725   | 0.004809796 | 0.030269462 | Up   |
| T | chr10 | <i>DUSP5</i>    | 0.243649626 | -2.037120089 | 1.42E-05    | 0.000461054 | Down |
| T | chr6  | <i>PHIP</i>     | 2.432275164 | 1.28230645   | 1.30E-07    | 1.36E-05    | Up   |
| T | chr12 | <i>WBP11</i>    | 0.378688484 | -1.400916546 | 7.20E-06    | 0.000288111 | Down |
| T | chr14 | <i>FKBP3</i>    | 1.957795145 | 0.969229816  | 0.002194131 | 0.017779273 | Up   |
| T | chr7  | <i>ESYT2</i>    | 1.732452745 | 0.792816002  | 0.005430743 | 0.032925391 | Up   |
| T | chr13 | <i>UTP14C</i>   | 4.584741257 | 2.196840317  | 2.19E-06    | 0.000117922 | Up   |
| T | chr5  | <i>REEP5</i>    | 0.316428013 | -1.660050768 | 5.79E-08    | 6.99E-06    | Down |
| T | chr5  | <i>TIFAB</i>    | 0.247322147 | -2.015536662 | 1.71E-06    | 9.99E-05    | Down |
| T | chr5  | <i>NPM1</i>     | 4.868032492 | 2.283338798  | 0.000182264 | 0.003006086 | Up   |
| T | chr6  | <i>RING1</i>    | 0.434052818 | -1.204057485 | 0.004120432 | 0.027190267 | Down |
| T | chr8  | <i>COPSS5</i>   | 2.002728875 | 1.001967125  | 0.007046318 | 0.039504197 | Up   |
| T | chr12 | <i>HIST4H4</i>  | 0.050875063 | -4.296897508 | 2.42E-06    | 0.000126291 | Down |
| T | chr13 | <i>CDK8</i>     | 1.818765821 | 0.862959798  | 0.004915766 | 0.030714122 | Up   |
| T | chr10 | <i>LZTS2</i>    | 0.427945643 | -1.224500536 | 0.001531039 | 0.013958023 | Down |
| T | chr11 | <i>PRKRIR</i>   | 5.729974253 | 2.518528656  | 2.80E-06    | 0.000140923 | Up   |
| T | chr19 | <i>ZNF526</i>   | 0.272990658 | -1.873076515 | 7.25E-07    | 5.10E-05    | Down |
| T | chr19 | <i>ZNF527</i>   | 2.248026323 | 1.168658929  | 0.003843984 | 0.026053934 | Up   |
| T | chr13 | <i>NDFIP2</i>   | 3.284037878 | 1.715470767  | 0.003976668 | 0.026562636 | Up   |
| T | chr6  | <i>DEK</i>      | 2.034348566 | 1.024566892  | 0.005367081 | 0.032627649 | Up   |
| T | chr9  | <i>ZDHHC12</i>  | 0.10777966  | -3.213843156 | 0.001778878 | 0.015461189 | Down |
| T | chr5  | <i>FAM114A2</i> | 2.120977102 | 1.084729045  | 0.005363995 | 0.032624647 | Up   |

|   |       |                 |             |              |             |             |      |
|---|-------|-----------------|-------------|--------------|-------------|-------------|------|
| T | chr3  | <i>IRAK2</i>    | 0.286866324 | -1.80154948  | 0.009005454 | 0.046937734 | Down |
| T | chr8  | <i>PCMTD1</i>   | 1.978087913 | 0.984106546  | 0.001408224 | 0.013207545 | Up   |
| T | chr13 | <i>TPT1</i>     | 0.52070235  | -0.941469177 | 2.93E-05    | 0.000779269 | Down |
| T | chr17 | <i>BAHCC1</i>   | 0.270367719 | -1.887005185 | 1.65E-08    | 2.37E-06    | Down |
| T | chr2  | <i>FZD7</i>     | 0.451865717 | -1.14603399  | 0.008445569 | 0.044898489 | Down |
| T | chr1  | <i>RNPEP</i>    | 0.559647396 | -0.837409948 | 0.000998075 | 0.010244601 | Down |
| T | chr6  | <i>EHMT2</i>    | 0.510537519 | -0.969911109 | 5.62E-05    | 0.001295556 | Down |
| T | chr2  | <i>MRPL19</i>   | 3.763644271 | 1.912130275  | 0.001136395 | 0.011351772 | Up   |
| T | chr1  | <i>KIFAP3</i>   | 2.017442036 | 1.012527224  | 0.003825479 | 0.025993334 | Up   |
| T | chr3  | <i>CLASP2</i>   | 1.617242998 | 0.693536466  | 0.005525843 | 0.033377224 | Up   |
| T | chr19 | <i>PRR12</i>    | 0.177657957 | -2.49282579  | 0.00035191  | 0.004858226 | Down |
| T | chr16 | <i>THUMPD1</i>  | 2.321085998 | 1.214799977  | 0.000560637 | 0.006747294 | Up   |
| T | chr6  | <i>RUNX2</i>    | 0.449349979 | -1.154088559 | 0.003382705 | 0.023867369 | Down |
| T | chr12 | <i>ATP6V0A2</i> | 0.501532538 | -0.995584793 | 0.006255839 | 0.036565266 | Down |
| T | chr1  | <i>RNF2</i>     | 2.070847858 | 1.050221565  | 0.000204571 | 0.00324676  | Up   |
| T | chr3  | <i>H1FX</i>     | 0.055672006 | -4.166904112 | 8.09E-09    | 1.32E-06    | Down |
| T | chr1  | <i>LRRC8C</i>   | 0.480520386 | -1.057330457 | 0.003621245 | 0.024945715 | Down |
| T | chr17 | <i>JUP</i>      | 0.329268452 | -1.602663806 | 0.000234967 | 0.003604637 | Down |
| T | chr17 | <i>FAM134C</i>  | 0.389789623 | -1.359232412 | 2.40E-06    | 0.000125664 | Down |
| T | chr11 | <i>ZNF143</i>   | 2.686997118 | 1.425994774  | 8.19E-05    | 0.001704099 | Up   |
| T | chr17 | <i>GAA</i>      | 0.35868585  | -1.479207261 | 0.001064739 | 0.010776245 | Down |
| T | chr11 | <i>NRGN</i>     | 0.190720178 | -2.390470609 | 2.19E-07    | 2.00E-05    | Down |
| T | chr4  | <i>LAP3</i>     | 2.30031439  | 1.201831051  | 0.006313005 | 0.036653079 | Up   |
| T | chr7  | <i>LRCH4</i>    | 0.259973204 | -1.943565163 | 3.27E-12    | 1.78E-09    | Down |
| T | chr1  | <i>SNORD76</i>  | Inf         | Inf          | 0.00624881  | 0.036556941 | Up   |
| T | chr14 | <i>LRP10</i>    | 0.31854333  | -1.650438466 | 2.75E-09    | 5.51E-07    | Down |
| T | chr11 | <i>MEN1</i>     | 0.581392411 | -0.782415855 | 0.008929373 | 0.04669042  | Down |
| T | chr4  | <i>COPS4</i>    | 1.711653442 | 0.775390629  | 0.009474748 | 0.048760377 | Up   |
| T | chr5  | <i>DAP</i>      | 0.255012514 | -1.971360052 | 0.000335832 | 0.004700544 | Down |
| T | chr17 | <i>MAFG</i>     | 0.53792461  | -0.894524102 | 0.00722202  | 0.040281522 | Down |
| T | chr11 | <i>AP5B1</i>    | 0.176225064 | -2.504508963 | 0.008912939 | 0.04664188  | Down |
| T | chrX  | <i>ZXDB</i>     | 0.215210421 | -2.216180158 | 0.001907573 | 0.016118001 | Down |
| T | chr12 | <i>FBRSL1</i>   | 0.17349042  | -2.527072091 | 0.000548974 | 0.006647391 | Down |
| T | chr12 | <i>CAPRIN2</i>  | 2.338962733 | 1.225868875  | 0.009468459 | 0.048759769 | Up   |
| T | chr2  | <i>RNU4ATAC</i> | 0.0966415   | -3.371213348 | 0.001310197 | 0.012549799 | Down |
| T | chr19 | <i>ZNF544</i>   | 3.764574668 | 1.912486874  | 0.001580138 | 0.014261296 | Up   |
| T | chr2  | <i>EML4</i>     | 1.768631101 | 0.822633164  | 0.001147675 | 0.011420723 | Up   |
| T | chr19 | <i>MBOAT7</i>   | 0.362821575 | -1.462667848 | 5.18E-06    | 0.000228336 | Down |
| T | chr7  | <i>TSC22D4</i>  | 0.324191977 | -1.625079708 | 6.78E-09    | 1.16E-06    | Down |
| T | chr10 | <i>SLC18A2</i>  | 1.888477185 | 0.917223354  | 0.00108268  | 0.010903115 | Up   |
| T | chr10 | <i>SUFU</i>     | 0.380234791 | -1.395037551 | 0.005030022 | 0.031189005 | Down |
| T | chr16 | <i>SH2B1</i>    | 0.3461747   | -1.530427806 | 6.21E-08    | 7.24E-06    | Down |
| T | chr11 | <i>CARNS1</i>   | 0.359064132 | -1.477686549 | 0.00659842  | 0.037888835 | Down |
| T | chr19 | <i>LSM4</i>     | 0.412490976 | -1.277565537 | 0.000830071 | 0.00897192  | Down |

|   |       |           |             |              |             |             |      |
|---|-------|-----------|-------------|--------------|-------------|-------------|------|
| T | chr2  | ACADL     | 2.917181391 | 1.544575096  | 0.005801459 | 0.034654685 | Up   |
| T | chr15 | VPS18     | 0.346811449 | -1.527776571 | 4.85E-07    | 3.68E-05    | Down |
| T | chr3  | ARL6      | 8.830728225 | 3.142532414  | 0.000114277 | 0.002157572 | Up   |
| T | chr11 | DYNC2H1   | 2.02093038  | 1.015019622  | 0.000247661 | 0.003752593 | Up   |
| T | chr17 | NFE2L1    | 0.54128075  | -0.885551013 | 0.001398289 | 0.013133247 | Down |
| T | chr1  | CPT2      | 0.486563141 | -1.039301061 | 0.002633202 | 0.020101087 | Down |
| T | chr2  | MRPL35    | Inf         | Inf          | 0.002793167 | 0.020894297 | Up   |
| T | chr13 | RNF17     | 22.75163634 | 4.507898406  | 0.000223109 | 0.003481667 | Up   |
| T | chr10 | CCDC6     | 0.50583336  | -0.983265907 | 0.003256192 | 0.023251385 | Down |
| T | chr9  | ABCA2     | 0.474542473 | -1.075390876 | 0.004735111 | 0.029972953 | Down |
| T | chr19 | B3GNT8    | 0.213465926 | -2.227922293 | 0.008755617 | 0.046189156 | Down |
| T | chr1  | JTB       | 3.058164931 | 1.612666216  | 0.005711284 | 0.034246382 | Up   |
| T | chr2  | ACSL3     | 2.184514161 | 1.127312458  | 0.000653747 | 0.007570473 | Up   |
| T | chr2  | RHOB      | 0.528038786 | -0.921284192 | 0.006777273 | 0.038559225 | Down |
| T | chr9  | GKAP1     | 24.27588306 | 4.601451871  | 1.83E-09    | 3.91E-07    | Up   |
| T | chr19 | MIDN      | 0.17759254  | -2.493357111 | 4.38E-05    | 0.001074288 | Down |
| T | chr19 | ZNF556    | 10.9216722  | 3.449121857  | 0.000256573 | 0.003860731 | Up   |
| T | chr19 | ZNF558    | 4.350017094 | 2.12102107   | 0.002575303 | 0.019798119 | Up   |
| T | chr17 | PAFAH1B1  | 1.835922203 | 0.876504926  | 0.000299063 | 0.00432068  | Up   |
| T | chr11 | PAK1      | 1.615152587 | 0.691670466  | 0.007766363 | 0.042234251 | Up   |
| T | chr19 | CRTC1     | 0.26853556  | -1.896814949 | 0.00724862  | 0.040388601 | Down |
| T | chr1  | IVNS1ABP  | 1.611552222 | 0.688450939  | 0.003243824 | 0.02320117  | Up   |
| T | chr11 | MALAT1    | 1.825949129 | 0.868646572  | 0.002354578 | 0.018605585 | Up   |
| T | chr15 | KATNB1    | 4.032845342 | 2.01179808   | 0.000124168 | 0.002284644 | Up   |
| T | chr1  | RUNX3     | 0.169388078 | -2.56159576  | 7.86E-07    | 5.43E-05    | Down |
| T | chr10 | HELLS     | 1.990968941 | 0.993470715  | 0.003170913 | 0.022730093 | Up   |
| T | chr11 | RDX       | 1.804736672 | 0.85178835   | 0.002385617 | 0.018782592 | Up   |
| T | chr18 | VPS4B     | 1.916585257 | 0.938538176  | 0.000784053 | 0.008573983 | Up   |
| T | chr1  | PHC2      | 0.394529538 | -1.341794776 | 2.29E-05    | 0.000658972 | Down |
| T | chr7  | FLJ40852  | 0.05388983  | -4.213843156 | 8.73E-07    | 5.81E-05    | Down |
| T | chr5  | TMED9     | 0.439489834 | -1.186098302 | 1.07E-05    | 0.000376935 | Down |
| T | chr16 | VPS35     | 2.07608825  | 1.053867771  | 0.000262661 | 0.003920574 | Up   |
| T | chr1  | ARHGAP29  | 8.703646169 | 3.121619908  | 2.53E-05    | 0.000705728 | Up   |
| T | chr14 | RNF31     | 0.389910193 | -1.358786224 | 7.91E-06    | 0.000307269 | Down |
| T | chr7  | MPP6      | 1.99565232  | 0.996860398  | 0.000180067 | 0.002981167 | Up   |
| T | chr5  | RASGRF2   | 0.018224951 | -5.777941265 | 3.06E-05    | 0.000805458 | Down |
| T | chr4  | KIAA1239  | 0           | #NAME?       | 7.67E-05    | 0.001614683 | Down |
| T | chr17 | NAGLU     | 0.403446971 | -1.309549036 | 0.005997105 | 0.035514402 | Down |
| T | chr1  | HIST3H2BB | 0.276621198 | -1.854016378 | 8.82E-05    | 0.00178632  | Down |
| T | chr9  | STRBP     | 1.702944101 | 0.76803108   | 0.001737156 | 0.015237203 | Up   |
| T | chr2  | SEMA4C    | 0.402848859 | -1.311689426 | 0.007838    | 0.04252428  | Down |
| T | chr19 | ZNF569    | 3.58660966  | 1.842620742  | 2.29E-05    | 0.000658972 | Up   |
| T | chr15 | SLC30A4   | 2.465909963 | 1.302120124  | 0.002809882 | 0.020971235 | Up   |
| T | chr3  | PSMD6     | 2.017446758 | 1.0125306    | 0.003730381 | 0.02553334  | Up   |

|   |       |                     |             |              |             |             |      |
|---|-------|---------------------|-------------|--------------|-------------|-------------|------|
| T | chr14 | <i>VRK1</i>         | 2.030233652 | 1.021645771  | 0.001829488 | 0.015733359 | Up   |
| T | chr3  | <i>MECOM</i>        | 2.263701612 | 1.178683803  | 8.06E-06    | 0.000311084 | Up   |
| T | chr7  | <i>ABCB5</i>        | 0.032399913 | -4.947866266 | 0.005778461 | 0.034533123 | Down |
| T | chr20 | <i>XRN2</i>         | 1.620512433 | 0.69645009   | 0.003880133 | 0.02621451  | Up   |
| T | chr16 | <i>PIEZO1</i>       | 0.298113467 | -1.746066546 | 0.000114279 | 0.002157572 | Down |
| T | chr1  | <i>ARHGAP30</i>     | 0.619252404 | -0.691400531 | 0.006408139 | 0.037089877 | Down |
| T | chr9  | <i>SPTAN1</i>       | 1.568031289 | 0.648954348  | 0.006816008 | 0.038704306 | Up   |
| T | chr5  | <i>H2AFY</i>        | 0.661446621 | -0.596303359 | 0.006560507 | 0.037720747 | Down |
| T | chr2  | <i>PSME4</i>        | 1.632570412 | 0.707145216  | 0.003954231 | 0.026489195 | Up   |
| T | chr15 | <i>SERF2</i>        | 0.354886835 | -1.494569038 | 2.18E-10    | 6.04E-08    | Down |
| T | chr11 | <i>RNF26</i>        | 0.232345062 | -2.105659108 | 0.000971238 | 0.010072159 | Down |
| T | chr19 | <i>ZNF571</i>       | 3.023645459 | 1.596288985  | 0.000806323 | 0.00877339  | Up   |
| T | chr19 | <i>ZNF574</i>       | 0.350646137 | -1.511912259 | 8.32E-06    | 0.000317546 | Down |
| T | chr5  | <i>MAP1B</i>        | 0.214512623 | -2.22086555  | 0.008349079 | 0.044544921 | Down |
| T | chr12 | <i>SH2B3</i>        | 0.297540444 | -1.748842312 | 5.22E-06    | 0.000228658 | Down |
| T | chr19 | <i>ZNF579</i>       | 0.171275155 | -2.545612201 | 0.000361358 | 0.004962391 | Down |
| T | chr3  | <i>LRRFIP2</i>      | 2.06614098  | 1.046938698  | 0.000875543 | 0.009331977 | Up   |
| T | chr1  | <i>LOC100130331</i> | 0.369266677 | -1.437265017 | 9.70E-07    | 6.26E-05    | Down |
| T | chr17 | <i>FAM171A2</i>     | 0.125568365 | -2.993455054 | 1.27E-06    | 7.81E-05    | Down |
| T | chr1  | <i>ZBED6</i>        | 1.638715253 | 0.71256519   | 0.004886939 | 0.030592616 | Up   |
| T | chr19 | <i>GPI</i>          | 0.573172801 | -0.802957945 | 0.000488262 | 0.006118988 | Down |
| T | chr6  | <i>PPP1R10</i>      | 0.581491066 | -0.782171068 | 0.001595559 | 0.014335858 | Down |
| T | chr10 | <i>FBXW4</i>        | 0.539509212 | -0.8902805   | 0.006559099 | 0.037720747 | Down |
| T | chr6  | <i>PPP1R18</i>      | 0.28659072  | -1.802936198 | 3.07E-08    | 4.12E-06    | Down |
| T | chr3  | <i>RPL22L1</i>      | 1.88466297  | 0.914306553  | 0.002010991 | 0.016771876 | Up   |
| T | chr10 | <i>TM9SF3</i>       | 1.90460224  | 0.929489735  | 0.001199992 | 0.011766867 | Up   |
| T | chr1  | <i>HIST3H2A</i>     | 0.201461668 | -2.311422731 | 8.58E-07    | 5.80E-05    | Down |
| T | chr7  | <i>FIGNL1</i>       | 2.809816969 | 1.490476156  | 0.000173357 | 0.002888403 | Up   |
| T | chr1  | <i>VCAM1</i>        | 3.403893754 | 1.767186007  | 0.000125798 | 0.002305002 | Up   |
| T | chr8  | <i>PHF20L1</i>      | 2.480470652 | 1.310613888  | 1.81E-07    | 1.74E-05    | Up   |
| T | chr21 | <i>USP16</i>        | 1.831244776 | 0.872824644  | 0.006389511 | 0.037014902 | Up   |
| T | chr11 | <i>SCYL1</i>        | 0.473008159 | -1.080063025 | 0.000264455 | 0.003925002 | Down |
| T | chr6  | <i>ARHGAP18</i>     | 1.956947585 | 0.968605115  | 0.000683493 | 0.00783554  | Up   |
| T | chr15 | <i>CLN6</i>         | 0.364739984 | -1.455059735 | 7.83E-05    | 0.001642703 | Down |
| T | chr20 | <i>CRNKL1</i>       | 1.730986033 | 0.791594084  | 0.006495449 | 0.037495412 | Up   |
| T | chr12 | <i>RNF41</i>        | 0.592992975 | -0.75391308  | 0.00835516  | 0.044544921 | Down |
| T | chr1  | <i>SF3A3</i>        | 2.043448016 | 1.031005543  | 0.000782491 | 0.008564075 | Up   |
| T | chr5  | <i>MCTP1</i>        | 3.008526999 | 1.589057304  | 3.58E-09    | 6.98E-07    | Up   |
| T | chr17 | <i>BLMH</i>         | 1.731277827 | 0.79183726   | 0.003136496 | 0.022630916 | Up   |
| T | chr11 | <i>ZNF195</i>       | 7.210431384 | 2.850085575  | 0.007243128 | 0.040381987 | Up   |
| T | chr1  | <i>VAMP4</i>        | 2.170476876 | 1.118012052  | 0.003902164 | 0.02630387  | Up   |
| T | chr9  | <i>TOR1B</i>        | 2.298601613 | 1.200756444  | 0.007160159 | 0.039970661 | Up   |
| T | chr19 | <i>BBC3</i>         | 0.23667809  | -2.079001939 | 0.004560859 | 0.029238801 | Down |
| T | chr2  | <i>SF3B1</i>        | 1.750394364 | 0.807679998  | 0.000551847 | 0.006659936 | Up   |

|   |       |                |             |              |             |             |      |
|---|-------|----------------|-------------|--------------|-------------|-------------|------|
| T | chr9  | <i>CDC37L1</i> | 2.520832753 | 1.333900404  | 0.000379719 | 0.005128175 | Up   |
| T | chr18 | <i>ZNF407</i>  | 1.797025035 | 0.845610508  | 0.0028274   | 0.021068212 | Up   |
| T | chr1  | <i>SLC9A1</i>  | 0.250785348 | -1.995475031 | 0.000506543 | 0.006287694 | Down |
| T | chr4  | <i>C4orf27</i> | 2.168546267 | 1.116728224  | 0.001178792 | 0.011627038 | Up   |
| T | chr20 | <i>MKKS</i>    | 3.125262672 | 1.64397745   | 0.001375786 | 0.013002562 | Up   |
| T | chr1  | <i>LAPTM5</i>  | 0.369934876 | -1.434656777 | 1.49E-06    | 8.84E-05    | Down |
| T | chr15 | <i>KLF13</i>   | 0.575060282 | -0.798214897 | 0.009574261 | 0.049078905 | Down |
| T | chr20 | <i>TUBB1</i>   | 0.325558333 | -1.619012028 | 1.49E-05    | 0.000476085 | Down |
| T | chr16 | <i>FBRS</i>    | 0.255311847 | -1.969667612 | 2.92E-06    | 0.000146009 | Down |
| T | chr20 | <i>KCNG1</i>   | 0.056080473 | -4.156357661 | 1.26E-09    | 2.89E-07    | Down |
| T | chr19 | <i>LTBP4</i>   | 0.082117836 | -3.606160578 | 0.001748165 | 0.015285903 | Down |
| T | chr3  | <i>CACNA1D</i> | 0.287285554 | -1.799442645 | 0.001654093 | 0.014724931 | Down |
| T | chr11 | <i>MRE11A</i>  | 2.524055151 | 1.335743434  | 0.0002064   | 0.003267838 | Up   |
| T | chr21 | <i>USP25</i>   | 1.74509346  | 0.803304303  | 0.001427255 | 0.013309484 | Up   |
| T | chr3  | <i>BSN</i>     | 0.361123037 | -1.469437638 | 1.13E-06    | 7.10E-05    | Down |
| T | chr11 | <i>UCP2</i>    | 0.294492366 | -1.763697857 | 7.27E-06    | 0.000290013 | Down |
| T | chr11 | <i>UCP3</i>    | 0.32347981  | -1.628252424 | 0.000815483 | 0.008850907 | Down |
| T | chr10 | <i>PCDH15</i>  | 0.022430709 | -5.478380983 | 0.000410007 | 0.005435929 | Down |
| T | chr2  | <i>EPHA4</i>   | 0.229929941 | -2.120733751 | 0.00116553  | 0.011536801 | Down |
| T | chr1  | <i>SF3B4</i>   | 0.320580312 | -1.641242268 | 2.92E-06    | 0.000146009 | Down |
| T | chr21 | <i>PFKL</i>    | 0.552560858 | -0.855794725 | 0.001599039 | 0.014347357 | Down |
| T | chrX  | <i>DRP2</i>    | 0.071504208 | -3.805828051 | 0.001834883 | 0.015745665 | Down |
| T | chrX  | <i>FRMD8P1</i> | 0.376269337 | -1.410162367 | 0.001930037 | 0.016255172 | Down |
| T | chr17 | <i>GIT1</i>    | 0.511667338 | -0.966721953 | 0.008245212 | 0.044121018 | Down |
| T | chr8  | <i>HOOK3</i>   | 2.585515269 | 1.370451825  | 2.27E-06    | 0.000120724 | Up   |
| T | chr3  | <i>EPHB3</i>   | 0.120801875 | -3.049285253 | 0.007140956 | 0.039918082 | Down |
| T | chr4  | <i>C4orf33</i> | Inf         | Inf          | 0.005929639 | 0.035237286 | Up   |
| T | chr12 | <i>RFX4</i>    | 0.1115389   | -3.164381149 | 0.001595403 | 0.014335858 | Down |
| T | chr17 | <i>TP53</i>    | 0.40378191  | -1.308351818 | 1.36E-05    | 0.000447834 | Down |
| T | chr7  | <i>CCT6P3</i>  | 8.364267877 | 3.064239267  | 0.002594056 | 0.019895387 | Up   |
| T | chr2  | <i>IKZF2</i>   | 1.759336342 | 0.815031317  | 0.001073903 | 0.010835377 | Up   |
| T | chr1  | <i>TPR</i>     | 1.898987091 | 0.925230098  | 0.000110633 | 0.002113201 | Up   |
| T | chr9  | <i>GLIS3</i>   | 0.321232032 | -1.638312337 | 0.008312398 | 0.044407676 | Down |
| T | chr17 | <i>G6PC3</i>   | 0.361245137 | -1.468949928 | 3.52E-05    | 0.000902841 | Down |
| T | chr9  | <i>ERCC6L2</i> | 2.713362915 | 1.440082022  | 7.85E-05    | 0.001643193 | Up   |
| T | chr3  | <i>PFN2</i>    | 4.656967861 | 2.219390926  | 0.001306287 | 0.012530752 | Up   |
| T | chr19 | <i>LPHN1</i>   | 0.513615956 | -0.961238072 | 0.001719362 | 0.015115095 | Down |
| T | chr6  | <i>REV3L</i>   | 1.684797854 | 0.752575504  | 0.002438108 | 0.019069279 | Up   |
| T | chr11 | <i>VPS51</i>   | 0.465649597 | -1.102683365 | 0.001474699 | 0.013644623 | Down |
| T | chr12 | <i>ACVRL1</i>  | 0.082516578 | -3.599172201 | 8.41E-05    | 0.001726799 | Down |
| T | chr14 | <i>RAD51B</i>  | 2.724176709 | 1.44582029   | 0.004627494 | 0.029499097 | Up   |
| T | chr16 | <i>E2F4</i>    | 0.508050109 | -0.976957299 | 0.000478017 | 0.006036992 | Down |
| T | chrX  | <i>WDR44</i>   | 1.89652944  | 0.923361767  | 0.005625678 | 0.033883931 | Up   |
| T | chrX  | <i>WDR45</i>   | 0.468749668 | -1.093110426 | 0.004466328 | 0.028841639 | Down |

|   |       |                     |             |              |             |             |      |
|---|-------|---------------------|-------------|--------------|-------------|-------------|------|
| T | chr10 | <i>CALHM2</i>       | 0.382435035 | -1.3867134   | 0.000344003 | 0.004769242 | Down |
| T | chr17 | <i>HDAC5</i>        | 0.422140679 | -1.244204234 | 1.84E-05    | 0.000560103 | Down |
| T | chr1  | <i>SLC26A9</i>      | 0.056645128 | -4.141904319 | 0.00513735  | 0.031569414 | Down |
| T | chr1  | <i>FNBP1L</i>       | 2.151428704 | 1.105295032  | 0.00011944  | 0.002222836 | Up   |
| T | chr15 | <i>CLPX</i>         | 2.180493844 | 1.124654917  | 6.92E-05    | 0.001513938 | Up   |
| T | chr8  | <i>GSDMD</i>        | 6.425855501 | 2.683888539  | 0.002695932 | 0.020400885 | Up   |
| T | chr9  | <i>CTNNA1</i>       | 14.70408841 | 3.878145441  | 0.001261986 | 0.012200628 | Up   |
| T | chr19 | <i>PIP5K1C</i>      | 0.505286412 | -0.984826711 | 0.001994212 | 0.016655883 | Down |
| T | chr7  | <i>GATAD1</i>       | 2.184619404 | 1.127381961  | 0.000880225 | 0.009374216 | Up   |
| T | chr7  | <i>SAMD9</i>        | 3.315973169 | 1.729432333  | 6.25E-05    | 0.001391091 | Up   |
| T | chr19 | <i>MYADM</i>        | 0.015734758 | -5.989901226 | 6.61E-06    | 0.000270338 | Down |
| T | chr1  | <i>EPHB2</i>        | 0.303520347 | -1.720134862 | 2.00E-06    | 0.000112423 | Down |
| T | chr2  | <i>CWC22</i>        | 1.784562156 | 0.835570151  | 0.006930977 | 0.039109658 | Up   |
| T | chr6  | <i>ABCF1</i>        | 0.431457644 | -1.212709158 | 7.40E-06    | 0.00029354  | Down |
| T | chr1  | <i>HIST3H3</i>      | 0.165455755 | -2.595482623 | 1.87E-14    | 1.88E-11    | Down |
| T | chr3  | <i>PPP2R3A</i>      | 2.130284938 | 1.091046412  | 0.000199342 | 0.003190947 | Up   |
| T | chr9  | <i>TOR4A</i>        | 0.183279434 | -2.447883188 | 0.000753267 | 0.008353895 | Down |
| T | chr8  | <i>LOC100500773</i> | 2.04679897  | 1.033369412  | 0.004459831 | 0.028841639 | Up   |
| T | chr3  | <i>CELSR3</i>       | 0.095804142 | -3.383768157 | 0.001356124 | 0.012895037 | Down |
| T | chr11 | <i>FGF3</i>         | 0           | #NAME?       | 0.009710678 | 0.049544587 | Down |
| T | chr5  | <i>SLC36A1</i>      | 0.409153711 | -1.289285159 | 0.006900949 | 0.038990811 | Down |
| T | chr5  | <i>SLC36A2</i>      | 0.21555932  | -2.213843156 | 0.008875357 | 0.046538548 | Down |
| T | chr1  | <i>HIST2H2AB</i>    | 0.481337545 | -1.054879134 | 0.000544065 | 0.006602669 | Down |
| T | chr9  | <i>STXBP1</i>       | 0.509565686 | -0.972659966 | 0.006808589 | 0.03870364  | Down |
| T | chr1  | <i>ABCD3</i>        | 2.093704675 | 1.066057959  | 0.000638435 | 0.007449929 | Up   |
| T | chr19 | <i>UQCR11</i>       | 0.186168647 | -2.425317968 | 0.000894427 | 0.009479034 | Down |
| T | chr8  | <i>ATP6V1H</i>      | 2.145344661 | 1.101209443  | 0.000102879 | 0.00200885  | Up   |
| T | chr8  | <i>VDAC3</i>        | 1.754719295 | 0.811240259  | 0.009789805 | 0.049817506 | Up   |
| T | chr12 | <i>RECQL</i>        | 3.162374047 | 1.661008021  | 0.004768586 | 0.030082519 | Up   |
| T | chr2  | <i>GLS</i>          | 2.282076107 | 1.190346906  | 2.16E-06    | 0.000117588 | Up   |
| T | chr3  | <i>CMTM7</i>        | 0.375543667 | -1.412947427 | 4.76E-09    | 8.58E-07    | Down |
| T | chr16 | <i>UBALD1</i>       | 0.182699633 | -2.452454362 | 6.34E-07    | 4.62E-05    | Down |
| T | chr19 | <i>IER2</i>         | 0.191840884 | -2.382017887 | 5.85E-05    | 0.001333889 | Down |
| T | chr12 | <i>RAP1B</i>        | 3.073412525 | 1.619841424  | 3.73E-06    | 0.000177708 | Up   |
| T | chr12 | <i>KDM2B</i>        | 0.538689308 | -0.892474664 | 0.000950603 | 0.009896453 | Down |
| T | chr8  | <i>MTSS1</i>        | 0.493596787 | -1.01859509  | 0.000214603 | 0.003376627 | Down |
| T | chr6  | <i>TFAP2A</i>       | 0           | #NAME?       | 1.47E-07    | 1.48E-05    | Down |
| T | chr11 | <i>IPO7</i>         | 1.824365377 | 0.867394696  | 0.000933716 | 0.009745012 | Up   |
| T | chr3  | <i>ZDHC3</i>        | 0.500461031 | -0.998670359 | 0.000117368 | 0.002196822 | Down |
| T | chr4  | <i>LCORL</i>        | 1.839971283 | 0.87968325   | 0.001145709 | 0.011418582 | Up   |
| T | chr1  | <i>RIT1</i>         | 3.69143942  | 1.884183483  | 0.00288648  | 0.021371745 | Up   |
| T | chr1  | <i>HIST2H2BF</i>    | 2.292152181 | 1.196702831  | 0.00084271  | 0.009062579 | Up   |
| T | chr11 | <i>ZBTB16</i>       | 0.444091136 | -1.17107232  | 0.000701091 | 0.007980915 | Down |
| T | chr9  | <i>MPDZ</i>         | 3.049061086 | 1.608365054  | 0.004177132 | 0.027453331 | Up   |

|   |       |          |             |              |             |             |      |
|---|-------|----------|-------------|--------------|-------------|-------------|------|
| T | chr7  | ZNF273   | 4.013711479 | 2.004936914  | 9.94E-05    | 0.00195496  | Up   |
| T | chr9  | TMEM2    | 1.99529847  | 0.996604571  | 0.006290688 | 0.036647452 | Up   |
| T | chr19 | ZIK1     | 5.179006058 | 2.372675246  | 3.22E-05    | 0.000843825 | Up   |
| T | chr5  | ZNF879   | 5.741549667 | 2.521440179  | 0.000483577 | 0.006083652 | Up   |
| T | chr1  | LCK      | 0.416319658 | -1.264236414 | 0.00013257  | 0.002412146 | Down |
| T | chr2  | TUBA3D   | 0.159208372 | -2.651011896 | 0.002612665 | 0.019979383 | Down |
| T | chr12 | HDAC7    | 0.288338459 | -1.794164814 | 0.000747639 | 0.008308822 | Down |
| T | chr2  | CLK1     | 2.012973135 | 1.009327918  | 3.61E-05    | 0.000922461 | Up   |
| T | chr11 | CASP12   | 6.39387979  | 2.67669162   | 0.000793555 | 0.008663363 | Up   |
| T | chr11 | POLD3    | 1.730337972 | 0.791053855  | 0.00890301  | 0.046627169 | Up   |
| T | chr22 | SREBF2   | 0.366437665 | -1.448360293 | 0.000333839 | 0.004678044 | Down |
| T | chr12 | NCAPD2   | 0.636037231 | -0.652816878 | 0.004742555 | 0.029980833 | Down |
| T | chr11 | UNC93B1  | 0.397603345 | -1.330598199 | 2.18E-06    | 0.000117911 | Down |
| T | chr1  | GBP2     | 10.20523453 | 3.351237433  | 0.000803409 | 0.008763607 | Up   |
| T | chr8  | SLC52A2  | 0.103752375 | -3.268783726 | 0.005248646 | 0.032101202 | Down |
| T | chr4  | ABCG2    | 2.035884808 | 1.025655935  | 0.004245263 | 0.027775173 | Up   |
| T | chr11 | CAPN1    | 0.401135539 | -1.317838307 | 3.01E-05    | 0.000793724 | Down |
| T | chr1  | GBP3     | 3.45104251  | 1.787032245  | 0.008636336 | 0.045726316 | Up   |
| T | chr11 | APLNR    | 0.029159921 | -5.09986936  | 0.004005868 | 0.026677157 | Down |
| T | chr1  | GBP5     | 5.872023394 | 2.553857716  | 4.63E-05    | 0.001114532 | Up   |
| T | chr17 | FZD2     | 0.143407157 | -2.801811069 | 0.006066716 | 0.035796644 | Down |
| T | chr1  | HOOK1    | 3.476052542 | 1.797449889  | 5.13E-07    | 3.85E-05    | Up   |
| T | chr2  | PTPN4    | 2.412438094 | 1.270491921  | 5.80E-06    | 0.00024659  | Up   |
| T | chr19 | SAE1     | 0.47375803  | -1.077777698 | 0.000916352 | 0.009625388 | Down |
| T | chr9  | UHRF2    | 1.684317436 | 0.752164063  | 0.00373469  | 0.025549433 | Up   |
| T | chr7  | ZNF282   | 0.453452591 | -1.140976371 | 0.000363045 | 0.004970198 | Down |
| T | chr17 | KDM6B    | 0.286937937 | -1.801189371 | 0.003957968 | 0.026489346 | Down |
| T | chr1  | OBSCN    | 0.143473614 | -2.801142659 | 0.001477784 | 0.013647734 | Down |
| T | chr9  | PTPRD    | 0.143090509 | -2.80500011  | 9.59E-06    | 0.00035041  | Down |
| T | chr6  | FBXO30   | 3.084460088 | 1.625017978  | 6.85E-06    | 0.000278271 | Up   |
| T | chr17 | ADAM11   | 0.211998837 | -2.237871747 | 1.96E-06    | 0.000110473 | Down |
| T | chr9  | PLAA     | 1.895393166 | 0.922497141  | 0.000396433 | 0.005299042 | Up   |
| T | chr9  | ZBTB6    | 3.488255866 | 1.802505867  | 9.41E-07    | 6.17E-05    | Up   |
| T | chr1  | TOR1AIP1 | 0.444239452 | -1.170590574 | 0.000926496 | 0.009685145 | Down |
| T | chr10 | MRPS16   | 0.430365018 | -1.216367282 | 0.007267667 | 0.040432404 | Down |
| T | chr5  | PTCD2    | 10.6579849  | 3.41386279   | 1.08E-05    | 0.000380699 | Up   |
| T | chr12 | CCND2    | 0.554158822 | -0.851628583 | 0.000467371 | 0.005942807 | Down |
| T | chr12 | OSBPL8   | 2.142266214 | 1.099137772  | 8.94E-06    | 0.000333367 | Up   |
| T | chr1  | KIRREL   | 0.151269698 | -2.724805075 | 0.00245867  | 0.019172627 | Down |
| T | chr13 | OLFM4    | 0           | #NAME?       | 0.000303901 | 0.004356801 | Down |
| T | chr6  | RXRB     | 0.424802975 | -1.235134225 | 5.91E-06    | 0.000248573 | Down |
| T | chrX  | MST4     | 1.820890869 | 0.86464446   | 0.005196774 | 0.031904526 | Up   |
| T | chr12 | MFSD5    | 0.341077169 | -1.551829908 | 0.00015094  | 0.002637183 | Down |
| T | chr1  | DHRS3    | 0.370132779 | -1.433885189 | 9.86E-06    | 0.000356372 | Down |

|   |       |                  |             |              |             |             |      |
|---|-------|------------------|-------------|--------------|-------------|-------------|------|
| T | chr17 | <i>MRPL12</i>    | 0.342734482 | -1.54483675  | 0.001855026 | 0.015829846 | Down |
| T | chr17 | <i>ARHGDI1A</i>  | 0.529064919 | -0.918483335 | 0.000185776 | 0.003044763 | Down |
| T | chr6  | <i>SHPRH</i>     | 1.762115696 | 0.817308651  | 0.00195497  | 0.016401632 | Up   |
| T | chr13 | <i>EXOSC8</i>    | 2.038699712 | 1.027649291  | 0.004354123 | 0.028359405 | Up   |
| T | chr5  | <i>NADKD1</i>    | 2.020278992 | 1.014554537  | 0.002110037 | 0.017334727 | Up   |
| T | chr2  | <i>HNMT</i>      | 44.00340874 | 5.459543382  | 3.92E-09    | 7.51E-07    | Up   |
| T | chr10 | <i>ZMYND11</i>   | 1.803941409 | 0.851152481  | 0.000869826 | 0.009282515 | Up   |
| T | chr8  | <i>UBE2W</i>     | 1.92067124  | 0.941610595  | 0.001414159 | 0.013253675 | Up   |
| T | chr11 | <i>SOX6</i>      | 2.631609573 | 1.395945466  | 0.000141966 | 0.002530174 | Up   |
| T | chrX  | <i>ZNF630</i>    | 3.659626719 | 1.871696501  | 0.006015783 | 0.035592703 | Up   |
| T | chr1  | <i>LIN9</i>      | 1.88044042  | 0.911070597  | 0.007585914 | 0.041509702 | Up   |
| T | chr5  | <i>SRFBP1</i>    | 2.690331316 | 1.427783852  | 0.008257289 | 0.044167525 | Up   |
| T | chr11 | <i>MTRNR2L8</i>  | 0.283395458 | -1.819111461 | 4.31E-07    | 3.42E-05    | Down |
| T | chr5  | <i>RANBP17</i>   | 2.316698587 | 1.212070355  | 0.002214608 | 0.017889642 | Up   |
| T | chrX  | <i>MTRNR2L10</i> | 0.188711865 | -2.405742964 | 3.56E-21    | 1.55E-17    | Down |
| T | chr9  | <i>FKTN</i>      | 5.049247771 | 2.336068474  | 0.000227018 | 0.003530006 | Up   |
| T | chr7  | <i>UBE2H</i>     | 0.401584235 | -1.316225459 | 0.001967184 | 0.016490442 | Down |
| T | chr14 | <i>CYP46A1</i>   | 0.021786588 | -5.520415942 | 0.000569371 | 0.00682095  | Down |
| T | chr2  | <i>ARID5A</i>    | 0.515058232 | -0.957192543 | 0.006278669 | 0.036647452 | Down |
| T | chr9  | <i>PTCH1</i>     | 0.590654644 | -0.759613263 | 0.008231245 | 0.044064353 | Down |
| T | chr2  | <i>SMC6</i>      | 1.922616396 | 0.943070942  | 0.004598627 | 0.029408674 | Up   |
| T | chr2  | <i>PTCD3</i>     | 4.151129622 | 2.053503982  | 0.005069505 | 0.031374206 | Up   |
| T | chrX  | <i>ZNF182</i>    | 2.736388099 | 1.452272861  | 0.001916491 | 0.016161955 | Up   |
| T | chr2  | <i>ALS2CR8</i>   | 3.580409561 | 1.840124626  | 0.002605895 | 0.019950998 | Up   |
| T | chr7  | <i>ING3</i>      | 2.376610579 | 1.248905529  | 0.000105392 | 0.002036964 | Up   |
| T | chr5  | <i>COL4A3BP</i>  | 1.799235459 | 0.847383999  | 0.001902104 | 0.016092641 | Up   |
| T | chr21 | <i>TTC3</i>      | 1.901982747 | 0.92750416   | 0.000823323 | 0.008921153 | Up   |
| T | chr12 | <i>KDM5A</i>     | 1.708427359 | 0.772668907  | 0.001362642 | 0.012928752 | Up   |
| T | chrX  | <i>CYSLTR1</i>   | 0.151913238 | -2.718680498 | 0.007129043 | 0.039916522 | Down |
| T | chr19 | <i>ARHGEF1</i>   | 0.312773855 | -1.676808174 | 0.000702682 | 0.007980915 | Down |
| T | chr12 | <i>CCDC38</i>    | 0.078765824 | -3.666286396 | 0.008905597 | 0.046627169 | Down |
| T | chr15 | <i>CA12</i>      | 0.133291956 | -2.907338382 | 4.50E-05    | 0.001091773 | Down |
| T | chr19 | <i>ISYNA1</i>    | 0.296929515 | -1.751807588 | 5.32E-06    | 0.000231947 | Down |
| T | chr4  | <i>PCDH7</i>     | 3.777448025 | 1.917411905  | 1.43E-09    | 3.17E-07    | Up   |
| T | chr7  | <i>YWHAG</i>     | 0.496022214 | -1.011523362 | 3.74E-05    | 0.000947254 | Down |
| T | chr1  | <i>DPM3</i>      | 0.287031809 | -1.800717467 | 0.00802675  | 0.043289367 | Down |
| T | chr5  | <i>CTNND2</i>    | 0.342982316 | -1.543793901 | 0.001663484 | 0.014773188 | Down |
| T | chr8  | <i>FAM83H</i>    | 0.179109418 | -2.481086895 | 0.00623153  | 0.036504955 | Down |
| T | chr19 | <i>EPN1</i>      | 0.533391243 | -0.906733955 | 0.000546295 | 0.006623576 | Down |
| T | chr5  | <i>ANKRD32</i>   | 2.233988029 | 1.159621455  | 0.000100354 | 0.001971714 | Up   |
| T | chr7  | <i>JHDM1D</i>    | 1.735412682 | 0.795278777  | 0.002944854 | 0.021656027 | Up   |
| T | chr11 | <i>DDX10</i>     | 2.325445893 | 1.217507373  | 0.000124011 | 0.002284644 | Up   |
| T | chr1  | <i>CCT3</i>      | 1.943546641 | 0.958691729  | 0.004696766 | 0.029831553 | Up   |
| T | chr6  | <i>DST</i>       | 1.983379257 | 0.987960573  | 0.000157612 | 0.002701985 | Up   |

|   |       |           |             |              |             |             |      |
|---|-------|-----------|-------------|--------------|-------------|-------------|------|
| T | chr16 | COX6A2    | 0.036449902 | -4.777941265 | 0.000161206 | 0.002745552 | Down |
| T | chr12 | CCDC41    | 2.130822405 | 1.091410355  | 0.000241931 | 0.003687185 | Up   |
| T | chr17 | SAMD14    | 0.199932662 | -2.322413916 | 0.000391795 | 0.005258605 | Down |
| T | chr12 | COPS7A    | 0.504930588 | -0.985843017 | 0.000833066 | 0.008996838 | Down |
| T | chr17 | PTRF      | 0.325799318 | -1.617944512 | 0.002847729 | 0.021193082 | Down |
| T | chrX  | TAF1      | 1.837761717 | 0.87794972   | 0.000594609 | 0.00706491  | Up   |
| T | chr1  | FAM132A   | 0.286947228 | -1.801142659 | 0.001622276 | 0.014515917 | Down |
| T | chr13 | UBAC2     | 0.49902972  | -1.002802355 | 0.001755464 | 0.015318914 | Down |
| T | chr3  | XXYL1     | 0.420834338 | -1.248675667 | 0.002097907 | 0.017283491 | Down |
| T | chr14 | SYNJ2BP   | Inf         | Inf          | 0.005934739 | 0.035241061 | Up   |
| T | chr17 | DDX52     | 2.64128817  | 1.401241711  | 1.73E-05    | 0.000537558 | Up   |
| T | chr18 | DSEL      | 2.600460199 | 1.378766957  | 0.000408363 | 0.005419642 | Up   |
| T | chr1  | PRPF38A   | 3.352841836 | 1.745384428  | 3.60E-05    | 0.000921919 | Up   |
| T | chr10 | SMC3      | 1.93769336  | 0.954340282  | 0.000124337 | 0.002284644 | Up   |
| T | chr9  | COL5A1    | 0.089031361 | -3.489542586 | 0.000454986 | 0.005836525 | Down |
| T | chr18 | TMX3      | 1.82853737  | 0.870690112  | 0.009573395 | 0.049078905 | Up   |
| T | chr3  | PTPRG     | 0           | #NAME?       | 0.003858085 | 0.026119654 | Down |
| T | chr19 | EPOR      | 0.078765824 | -3.666286396 | 0.000102045 | 0.001995918 | Down |
| T | chr4  | NUP54     | 2.381345889 | 1.251777187  | 7.95E-05    | 0.001663065 | Up   |
| T | chr19 | PSENFEN   | 0.393603029 | -1.34518677  | 1.06E-05    | 0.000376935 | Down |
| T | chr1  | APH1A     | 0.336268097 | -1.572316185 | 2.37E-10    | 6.43E-08    | Down |
| T | chrX  | KLHL15    | 2.039676608 | 1.02834043   | 0.002245709 | 0.018073729 | Up   |
| T | chr9  | RAPGEF1   | 0.495301296 | -1.013621699 | 5.86E-05    | 0.0013346   | Down |
| T | chr3  | EIF4A2    | 2.041537182 | 1.029655843  | 0.001792269 | 0.015546505 | Up   |
| T | chr17 | SCN4A     | 0.026128402 | -5.258237275 | 8.91E-06    | 0.000332887 | Down |
| T | chr7  | DTX2      | 0.142729296 | -2.808646607 | 2.93E-05    | 0.000779425 | Down |
| T | chr10 | MPP7      | 2.39210567  | 1.258281121  | 0.00265675  | 0.020233485 | Up   |
| T | chr8  | KHDRBS3   | 4.012543438 | 2.00451701   | 2.90E-05    | 0.000775651 | Up   |
| T | chr8  | SDC2      | 8.793293122 | 3.136403561  | 0.002875687 | 0.02133071  | Up   |
| T | chr9  | CD72      | 0           | #NAME?       | 0.003057975 | 0.022146029 | Down |
| T | chr2  | PABPC1P2  | 0.105067407 | -3.250612893 | 4.57E-08    | 5.79E-06    | Down |
| T | chr2  | FHL2      | 0.102424806 | -3.28736293  | 0.000365431 | 0.00498845  | Down |
| T | chr12 | KIAA1033  | 2.939689173 | 1.55566362   | 2.27E-07    | 2.05E-05    | Up   |
| T | chr6  | UTRN      | 1.978694377 | 0.984548796  | 8.34E-05    | 0.001719865 | Up   |
| T | chr11 | EED       | 1.656848105 | 0.728441346  | 0.0060899   | 0.035880818 | Up   |
| T | chr12 | SUDS3     | 7.642001836 | 2.933950604  | 0.000503036 | 0.006262032 | Up   |
| T | chr2  | AFTPH     | 2.157518189 | 1.109372722  | 2.22E-05    | 0.000647284 | Up   |
| T | chr2  | RNPEPL1   | 0.323429063 | -1.628478771 | 6.97E-06    | 0.000281467 | Down |
| T | chr17 | LINC00672 | 0.053018039 | -4.237372883 | 0.00304387  | 0.02211569  | Down |
| T | chr7  | PLOD3     | 0.429207363 | -1.220253271 | 0.000125551 | 0.002303712 | Down |
| T | chr16 | MTRNR2L4  | 0.394459723 | -1.342050096 | 0.004173355 | 0.027442616 | Down |
| T | chr2  | LRPPRC    | 2.403939893 | 1.265400824  | 7.67E-05    | 0.001614683 | Up   |
| T | chr6  | SKIV2L    | 0.499841116 | -1.000458514 | 0.000181959 | 0.003006086 | Down |
| T | chr17 | ITGB3     | 0.399652735 | -1.323181132 | 0.000615811 | 0.007263894 | Down |

|   |       |                 |             |              |             |             |      |
|---|-------|-----------------|-------------|--------------|-------------|-------------|------|
| T | chr16 | <i>ITGAL</i>    | 0.258947169 | -1.94927031  | 2.68E-05    | 0.000731415 | Down |
| T | chr19 | <i>TOMM40</i>   | 0.342403224 | -1.54623181  | 1.11E-05    | 0.000387479 | Down |
| T | chr5  | <i>EFNA5</i>    | 0.053104807 | -4.235013723 | 0.000755268 | 0.008363084 | Down |
| T | chr13 | <i>NUFIP1</i>   | 4.022936612 | 2.008249006  | 0.000331127 | 0.004660068 | Up   |
| T | chr6  | <i>CDC5L</i>    | 1.819109585 | 0.863232455  | 0.000701992 | 0.007980915 | Up   |
| T | chr17 | <i>SLC39A11</i> | 0.454976444 | -1.136136242 | 0.002646073 | 0.020187523 | Down |
| T | chr16 | <i>IRF8</i>     | 0.482560824 | -1.051217299 | 0.00048414  | 0.006084859 | Down |
| T | chr5  | <i>ANKHD1</i>   | 3.624746002 | 1.857879904  | 0.001346055 | 0.012817984 | Up   |
| T | chr1  | <i>PTPRC</i>    | 1.695842551 | 0.76200223   | 0.002291131 | 0.018259071 | Up   |
| T | chr8  | <i>PTPA43</i>   | 0.285471426 | -1.808581748 | 2.79E-09    | 5.51E-07    | Down |
| T | chr6  | <i>VTA1</i>     | 2.633050366 | 1.396735118  | 0.00031831  | 0.004523602 | Up   |
| T | chr1  | <i>PTPRF</i>    | 0.419021578 | -1.254903557 | 0.000301339 | 0.004334358 | Down |
| T | chr1  | <i>UBE2T</i>    | 3.265714407 | 1.70739863   | 0.006186137 | 0.036304246 | Up   |
| T | chr19 | <i>AP2A1</i>    | 0.439296027 | -1.186734644 | 2.69E-06    | 0.000136694 | Down |
| T | chr10 | <i>NCOA4</i>    | 2.107032912 | 1.075212849  | 0.000230433 | 0.003561884 | Up   |
| T | chrX  | <i>ZNF674</i>   | 5.439039955 | 2.443352024  | 3.43E-07    | 2.83E-05    | Up   |
| T | chr22 | <i>TAB1</i>     | 0.465138548 | -1.104267588 | 0.005769733 | 0.034527666 | Down |
| T | chr17 | <i>TOP2A</i>    | 1.987813652 | 0.991182518  | 2.95E-05    | 0.000782791 | Up   |
| T | chr12 | <i>GRIN2B</i>   | 0           | #NAME?       | 0.002573173 | 0.019793408 | Down |
| T | chr10 | <i>EMX2</i>     | 0           | #NAME?       | 0.003423599 | 0.02408582  | Down |
| T | chr1  | <i>PTPRU</i>    | 0.171275155 | -2.545612201 | 0.000198682 | 0.003188194 | Down |
| T | chr3  | <i>MASP1</i>    | 0           | #NAME?       | 4.64E-06    | 0.000211052 | Down |
| T | chr19 | <i>MIER2</i>    | 7.49784381  | 2.906475773  | 0.004776667 | 0.030104537 | Up   |
| T | chr4  | <i>ATP10D</i>   | 1.694796619 | 0.761112156  | 0.008010387 | 0.043236869 | Up   |
| T | chr19 | <i>RFX1</i>     | 0.323813081 | -1.626766829 | 9.19E-05    | 0.001842422 | Down |
| T | chr7  | <i>MYO1G</i>    | 0.559627221 | -0.837461956 | 0.000986368 | 0.010171693 | Down |
| T | chr4  | <i>TRMT44</i>   | 11.52161778 | 3.526271398  | 0.009330489 | 0.048246355 | Up   |
| T | chr22 | <i>LGALS1</i>   | 0.496476416 | -1.010202907 | 0.002909622 | 0.021465449 | Down |
| T | chr12 | <i>DDX54</i>    | 0.525041802 | -0.929495805 | 0.001632962 | 0.014591525 | Down |
| T | chr11 | <i>SLC25A22</i> | 0.358055477 | -1.48174496  | 0.001157931 | 0.011472639 | Down |
| T | chr14 | <i>MIS18BP1</i> | 3.413545911 | 1.771271156  | 0.000237201 | 0.003627811 | Up   |
| T | chr4  | <i>RBM47</i>    | 0.317076292 | -1.657098087 | 8.31E-05    | 0.001717938 | Down |
| T | chr9  | <i>ZNF658</i>   | Inf         | Inf          | 9.65E-09    | 1.54E-06    | Up   |
| T | chr8  | <i>PCM1</i>     | 2.344650614 | 1.229372957  | 6.80E-07    | 4.82E-05    | Up   |
| T | chr2  | <i>NCKAP1</i>   | 2.416686913 | 1.273030581  | 0.007374952 | 0.040828347 | Up   |
| T | chrX  | <i>TFE3</i>     | 0.289580795 | -1.78796217  | 2.50E-06    | 0.000129633 | Down |
| T | chr3  | <i>MYNN</i>     | 1.932847896 | 0.95072811   | 0.002480227 | 0.019283099 | Up   |
| T | chr5  | <i>MYO10</i>    | 0.474579678 | -1.075277771 | 0.002052567 | 0.017001768 | Down |
| T | chr16 | <i>ATXN2L</i>   | 0.344649309 | -1.536798974 | 5.77E-05    | 0.001324732 | Down |
| T | chr6  | <i>BEND3</i>    | 0.401300794 | -1.317244083 | 0.009763406 | 0.049735806 | Down |
| T | chr2  | <i>RNF103</i>   | 1.823201393 | 0.866473932  | 0.00367931  | 0.025250016 | Up   |
| T | chr19 | <i>SHKBP1</i>   | 0.407140402 | -1.296401703 | 0.002163623 | 0.017595063 | Down |
| T | chrX  | <i>THOC2</i>    | 1.964093485 | 0.973863599  | 5.78E-05    | 0.001324732 | Up   |
| T | chr1  | <i>TRMT13</i>   | 2.49092466  | 1.316681387  | 0.001497498 | 0.013741559 | Up   |

|   |       |                 |             |              |             |             |      |
|---|-------|-----------------|-------------|--------------|-------------|-------------|------|
| T | chr2  | <i>SMEK2</i>    | 1.640837844 | 0.714432671  | 0.003618195 | 0.024945715 | Up   |
| T | chr6  | <i>IER3</i>     | 0.215768659 | -2.212442769 | 0.002275657 | 0.018207089 | Down |
| T | chr9  | <i>BNC2</i>     | 0.124434565 | -3.006540802 | 0.002282795 | 0.018226038 | Down |
| T | chr1  | <i>CEP170</i>   | 2.035003793 | 1.025031483  | 0.003920632 | 0.026365237 | Up   |
| T | chr7  | <i>ZC3HAV1</i>  | 0.503328292 | -0.990428401 | 0.005317961 | 0.032433202 | Down |
| T | chr7  | <i>ARPC1B</i>   | 0.623943178 | -0.680513445 | 0.003705052 | 0.025386608 | Down |
| T | chr17 | <i>GRN</i>      | 0.381381629 | -1.390692745 | 0.000151366 | 0.002637183 | Down |
| T | chr5  | <i>MGAT1</i>    | 0.413777643 | -1.273072398 | 3.14E-07    | 2.67E-05    | Down |
| T | chr10 | <i>DDX50</i>    | 1.80194841  | 0.849557707  | 0.000897588 | 0.009497112 | Up   |
| T | chr19 | <i>MYH14</i>    | 0.50801944  | -0.97704439  | 0.004608786 | 0.029444845 | Down |
| T | chr10 | <i>IDI1</i>     | 10.64961133 | 3.412728873  | 1.29E-05    | 0.000432088 | Up   |
| T | chr9  | <i>RMRP</i>     | 0.586412312 | -0.7700127   | 0.004581632 | 0.029357549 | Down |
| T | chr11 | <i>TBC1D10C</i> | 0.279294682 | -1.84013999  | 1.13E-08    | 1.74E-06    | Down |
| T | chr9  | <i>AGTPBP1</i>  | 2.583945244 | 1.369575498  | 3.37E-05    | 0.000871538 | Up   |
| T | chr4  | <i>SH3TC1</i>   | 0.092532094 | -3.433902354 | 6.19E-06    | 0.000255819 | Down |
| T | chr6  | <i>ZNF184</i>   | 2.197568739 | 1.135908293  | 0.001574536 | 0.014235198 | Up   |
| T | chrX  | <i>KIF4A</i>    | 2.235984941 | 1.160910472  | 0.000987074 | 0.010171693 | Up   |
| T | chr8  | <i>RNF19A</i>   | 2.582956781 | 1.369023504  | 8.42E-06    | 0.000319141 | Up   |
| T | chr13 | <i>NAA16</i>    | 2.033869061 | 1.024226803  | 0.000723677 | 0.008131986 | Up   |
| T | chr12 | <i>CCDC91</i>   | Inf         | Inf          | 0.00014084  | 0.002516987 | Up   |
| T | chr3  | <i>ZNF148</i>   | 1.873783111 | 0.905953972  | 0.000187264 | 0.003061462 | Up   |
| T | chr19 | <i>CYP4F2</i>   | 0.297904094 | -1.747080143 | 0.006869539 | 0.038880695 | Down |
| T | chr11 | <i>MRPL11</i>   | 6.114840938 | 2.612314971  | 0.000695955 | 0.007959111 | Up   |
| T | chr12 | <i>STAT6</i>    | 0.552113182 | -0.856964049 | 0.001499922 | 0.013741559 | Down |
| T | chr20 | <i>BLCAP</i>    | 0.507417907 | -0.978753661 | 0.004209285 | 0.027567436 | Down |
| T | chr8  | <i>PREX2</i>    | 22.57652923 | 4.496751807  | 6.46E-08    | 7.32E-06    | Up   |
| T | chr3  | <i>GBE1</i>     | 2.078397906 | 1.055471882  | 0.000673732 | 0.00775089  | Up   |
| T | chr20 | <i>OSBPL2</i>   | 0.490499909 | -1.027675226 | 0.004410692 | 0.028627803 | Down |
| T | chr17 | <i>COASY</i>    | 0.466795869 | -1.099136301 | 0.001676836 | 0.014861414 | Down |
| T | chr3  | <i>POC1A</i>    | 0.451298189 | -1.147847105 | 0.000598736 | 0.007094557 | Down |
| T | chr14 | <i>ACTR10</i>   | 1.9094518   | 0.933158503  | 0.001576214 | 0.014240501 | Up   |
| T | chr17 | <i>PHF12</i>    | 0.59891354  | -0.739580346 | 0.006690958 | 0.038234885 | Down |
| T | chr1  | <i>ZNF281</i>   | 1.842821672 | 0.881916469  | 0.0008131   | 0.008839749 | Up   |
| T | chr11 | <i>CUL5</i>     | 2.251638047 | 1.170974931  | 2.35E-05    | 0.000668336 | Up   |
| T | chr4  | <i>SYNPO2</i>   | 0.285535591 | -1.808257513 | 0.002610098 | 0.019971462 | Down |
| T | chr2  | <i>MGAT5</i>    | 0.558214824 | -0.841107659 | 0.004716589 | 0.029899235 | Down |
| T | chrX  | <i>GLA</i>      | 14.97894047 | 3.904863674  | 0.00114235  | 0.011393805 | Up   |
| T | chr7  | <i>RBAK</i>     | 2.483978913 | 1.312652926  | 0.001375468 | 0.013002562 | Up   |
| T | chr1  | <i>C1orf27</i>  | 2.910538075 | 1.541285891  | 0.000858424 | 0.009194577 | Up   |
| T | chr19 | <i>SYMPK</i>    | 0.569945911 | -0.811103085 | 0.006288899 | 0.036647452 | Down |
| T | chr10 | <i>ITGB1</i>    | 1.725611368 | 0.787107586  | 0.002198    | 0.017788529 | Up   |
| T | chr15 | <i>BLM</i>      | 1.902020473 | 0.927532776  | 0.001308202 | 0.012539904 | Up   |
| T | chr11 | <i>TMEM134</i>  | 0.321153215 | -1.638666354 | 0.000169229 | 0.002837832 | Down |
| T | chr2  | <i>GCC2</i>     | 2.04096317  | 1.029250149  | 0.000625474 | 0.007326292 | Up   |

|   |       |                 |             |              |             |             |      |
|---|-------|-----------------|-------------|--------------|-------------|-------------|------|
| T | chr2  | <i>SNORA80B</i> | 0.057761604 | -4.113745373 | 0.000516736 | 0.006363919 | Down |
| T | chr19 | <i>PLEKHJ1</i>  | 0.392795402 | -1.348150054 | 0.00314745  | 0.022671402 | Down |
| T | chr13 | <i>SNORA31</i>  | 0.27699158  | -1.852085974 | 0.002030471 | 0.016872151 | Down |
| T | chr7  | <i>CEP41</i>    | 2.261815112 | 1.177481003  | 0.004628595 | 0.029499097 | Up   |
| T | chr18 | <i>MALT1</i>    | 2.15282533  | 1.106231271  | 0.0008379   | 0.009034086 | Up   |
| T | chr3  | <i>ZNF619</i>   | Inf         | Inf          | 0.001088722 | 0.010943444 | Up   |
| T | chr7  | <i>LRRN3</i>    | 2.694144032 | 1.429826981  | 0.000567972 | 0.006816712 | Up   |
| T | chr14 | <i>TINF2</i>    | Inf         | Inf          | 0.000458793 | 0.005879576 | Up   |
| T | chr19 | <i>RPS9</i>     | 0.62633097  | -0.675002878 | 0.003769009 | 0.025663099 | Down |
| T | chr6  | <i>TMEM63B</i>  | 0.400166902 | -1.321326249 | 9.65E-05    | 0.001919072 | Down |
| T | chr17 | <i>LPO</i>      | 0.230504329 | -2.11713425  | 6.50E-10    | 1.63E-07    | Down |
| T | chr15 | <i>BAHD1</i>    | 0.431583527 | -1.212288295 | 0.000174775 | 0.002908306 | Down |
| T | chr7  | <i>HEATR2</i>   | 0.180808313 | -2.467467082 | 0.000365932 | 0.00498845  | Down |
| T | chr17 | <i>MIR5047</i>  | 1.993705473 | 0.995452298  | 0.002983124 | 0.021814929 | Up   |
| T | chr9  | <i>POLR1E</i>   | 4.418615148 | 2.143594281  | 0.003844383 | 0.026053934 | Up   |
| T | chr3  | <i>ZNF167</i>   | 4.108187438 | 2.038502007  | 0.001205273 | 0.011787104 | Up   |
| T | chr1  | <i>ATP13A2</i>  | 0.287770496 | -1.797009411 | 1.20E-11    | 4.67E-09    | Down |
| T | chrX  | <i>MTCP1</i>    | 3.977607037 | 1.991900754  | 0.000329843 | 0.004653212 | Up   |
| T | chr6  | <i>SLC35A1</i>  | 2.184766536 | 1.127479122  | 0.002277631 | 0.018207089 | Up   |
| T | chr14 | <i>NAA30</i>    | 1.89285673  | 0.920565217  | 0.002309598 | 0.018368799 | Up   |
| T | chr9  | <i>SMC2</i>     | 2.011503452 | 1.008274214  | 0.000423675 | 0.005566224 | Up   |
| T | chrX  | <i>DDX26B</i>   | 1.942303892 | 0.957768942  | 0.00013851  | 0.002488978 | Up   |
| T | chr2  | <i>MYO3B</i>    | 0.090078057 | -3.472680474 | 0.000753682 | 0.008353895 | Down |
| T | chr9  | <i>SMC5</i>     | 2.056151557 | 1.039946608  | 8.48E-05    | 0.001739168 | Up   |
| T | chr14 | <i>SAMD4A</i>   | 0.028741243 | -5.120733751 | 5.11E-06    | 0.000227871 | Down |
| T | chr7  | <i>DNAJB9</i>   | 1.817692706 | 0.862108322  | 0.008821419 | 0.046386227 | Up   |
| T | chr2  | <i>SPC25</i>    | 3.481349029 | 1.799646461  | 0.00278054  | 0.020843917 | Up   |
| T | chr9  | <i>ALDH1A1</i>  | 3.942424709 | 1.979083203  | 0.003959392 | 0.026489346 | Up   |
| T | chr5  | <i>FTMT</i>     | 0.021786588 | -5.520415942 | 0.000366704 | 0.004993754 | Down |
| T | chr17 | <i>BZRAP1</i>   | 0.470463029 | -1.087846741 | 0.003738844 | 0.025564441 | Down |
| T | chr2  | <i>SCARNAS</i>  | 0.261121697 | -1.937205757 | 0.00175539  | 0.015318914 | Down |
| T | chr6  | <i>NRM</i>      | 0.265746554 | -1.911877113 | 4.41E-06    | 0.000204976 | Down |
| T | chr1  | <i>RXRG</i>     | 0.174218557 | -2.52102979  | 0.000623045 | 0.007322741 | Down |
| T | chr3  | <i>CHDH</i>     | 0.150917127 | -2.728171559 | 1.58E-12    | 1.03E-09    | Down |
| T | chr5  | <i>RNF180</i>   | 5.424562083 | 2.439506676  | 0.008588096 | 0.045563361 | Up   |
| T | chr12 | <i>KIAA1551</i> | 2.672455641 | 1.418166001  | 0.00316909  | 0.022730093 | Up   |
| T | chr2  | <i>EEF1B2</i>   | 0.203881638 | -2.294196244 | 3.97E-12    | 2.07E-09    | Down |
| T | chr3  | <i>ATG3</i>     | 2.151988858 | 1.105670608  | 0.003170993 | 0.022730093 | Up   |
| T | chr2  | <i>MCM6</i>     | 1.610693649 | 0.687682123  | 0.003643799 | 0.025059039 | Up   |
| T | chr6  | <i>SLC35B2</i>  | 0.528955343 | -0.918782166 | 0.001685044 | 0.014903786 | Down |
| T | chr1  | <i>IGSF3</i>    | 0.119406279 | -3.066049396 | 0.000133705 | 0.002422659 | Down |
| T | chr7  | <i>DNAJC2</i>   | 2.154701059 | 1.107487725  | 0.002873914 | 0.02133071  | Up   |
| T | chr1  | <i>IGSF8</i>    | 0.247754095 | -2.013019193 | 1.77E-06    | 0.000102003 | Down |
| T | chr20 | <i>ADRM1</i>    | 0.550808002 | -0.860378577 | 0.004185031 | 0.027484181 | Down |

|   |       |                   |             |              |             |             |      |
|---|-------|-------------------|-------------|--------------|-------------|-------------|------|
| T | chr10 | <i>NSMCE4A</i>    | 2.513586391 | 1.329747275  | 5.89E-05    | 0.001338096 | Up   |
| T | chr16 | <i>GPR56</i>      | 0.346853862 | -1.527600145 | 0.005976736 | 0.035409852 | Down |
| T | chr9  | <i>ALDH1B1</i>    | 0.409094848 | -1.289492727 | 0.000266543 | 0.003942546 | Down |
| T | chr2  | <i>HIBCH</i>      | 4.150461944 | 2.053271917  | 0.000122095 | 0.002265787 | Up   |
| T | chr12 | <i>HVCN1</i>      | 0.183025689 | -2.449881938 | 3.14E-05    | 0.000825177 | Down |
| T | chr19 | <i>ZNF700</i>     | 2.490442496 | 1.3164021    | 0.00735609  | 0.040750554 | Up   |
| T | chr12 | <i>SCN8A</i>      | 0           | #NAME?       | 9.95E-12    | 4.33E-09    | Down |
| T | chr15 | <i>LEO1</i>       | 2.315005243 | 1.211015461  | 0.001712751 | 0.015087478 | Up   |
| T | chr2  | <i>PIKFYVE</i>    | 2.130479806 | 1.091178377  | 3.50E-05    | 0.000899611 | Up   |
| T | chr19 | <i>TBXA2R</i>     | 0.025747785 | -5.279407843 | 0.000915695 | 0.009625388 | Down |
| T | chr9  | <i>KLHL9</i>      | 1.918226473 | 0.93977306   | 0.000170013 | 0.002847223 | Up   |
| T | chr19 | <i>ZNF780B</i>    | 2.856286311 | 1.514140601  | 0.00485912  | 0.030462316 | Up   |
| T | chr5  | <i>LSP1P3</i>     | 17.80282328 | 4.154034146  | 0.000552822 | 0.006665545 | Up   |
| T | chr15 | <i>FURIN</i>      | 0.318781165 | -1.649361703 | 2.99E-07    | 2.59E-05    | Down |
| T | chr3  | <i>MLH1</i>       | 1.812387371 | 0.857891343  | 0.004814041 | 0.030281569 | Up   |
| T | chr22 | <i>MFNG</i>       | 0.486411426 | -1.039750976 | 0.001886317 | 0.016014885 | Down |
| T | chr2  | <i>DES</i>        | 0.122578642 | -3.028220472 | 0.007454513 | 0.04106908  | Down |
| T | chr2  | <i>SNRNP27</i>    | 2.487582864 | 1.314744584  | 0.004960672 | 0.030882793 | Up   |
| T | chr19 | <i>RPS16</i>      | 0.183169193 | -2.448751215 | 1.32E-12    | 9.06E-10    | Down |
| T | chr10 | <i>PANK1</i>      | 2.308822377 | 1.207157188  | 0.000190673 | 0.003086894 | Up   |
| T | chr2  | <i>ATG9A</i>      | 0.436546784 | -1.195791822 | 0.00025013  | 0.003781225 | Down |
| T | chr21 | <i>MORC3</i>      | 2.339978218 | 1.226495101  | 5.13E-06    | 0.000227871 | Up   |
| T | chr7  | <i>KEL</i>        | 0.2230778   | -2.164381149 | 0.00965049  | 0.049344776 | Down |
| T | chr7  | <i>ACHE</i>       | 0.191608284 | -2.383768157 | 0.0081357   | 0.043742072 | Down |
| T | chr1  | <i>FAAH</i>       | 0.398041622 | -1.329008799 | 0.006091983 | 0.035880818 | Down |
| T | chr8  | <i>NUDCD1</i>     | 1.945890543 | 0.96043056   | 0.003761441 | 0.025651733 | Up   |
| T | chr14 | <i>ARHGAP5</i>    | 2.503423333 | 1.323902274  | 4.63E-05    | 0.001114532 | Up   |
| T | chr11 | <i>LRFN4</i>      | 0.231919272 | -2.108305382 | 0.000478011 | 0.006036992 | Down |
| T | chr2  | <i>MYT1L</i>      | 0           | #NAME?       | 8.68E-05    | 0.001764576 | Down |
| T | chr9  | <i>CNTLN</i>      | 3.223553618 | 1.68865198   | 8.71E-08    | 9.62E-06    | Up   |
| T | chr10 | <i>YME1L1</i>     | 2.197977268 | 1.136176466  | 0.000386407 | 0.00520204  | Up   |
| T | chrX  | <i>MIR223</i>     | 0.057482485 | -4.120733751 | 0.004333448 | 0.028267079 | Down |
| T | chr5  | <i>ZFP62</i>      | 2.002809336 | 1.002025086  | 0.000275399 | 0.004036921 | Up   |
| T | chr5  | <i>UIMC1</i>      | 1.805720406 | 0.852574527  | 0.003334827 | 0.023644649 | Up   |
| T | chr9  | <i>ST6GALNAC4</i> | 0.383740585 | -1.381796742 | 0.002161921 | 0.017595063 | Down |
| T | chr14 | <i>G2E3</i>       | 2.277756856 | 1.187613752  | 0.00275509  | 0.020728322 | Up   |
| T | chr3  | <i>ZNF197</i>     | 2.564814034 | 1.358854225  | 0.002472635 | 0.019258506 | Up   |
| T | chr10 | <i>HNRNPA3P1</i>  | 0.379047351 | -1.399550011 | 0.001452151 | 0.013512673 | Down |
| T | chr6  | <i>ZBTB12</i>     | 0.383209    | -1.383796652 | 0.001841223 | 0.015751209 | Down |
| T | chr1  | <i>EGLN1</i>      | 0.450685987 | -1.149805502 | 0.001536845 | 0.014001175 | Down |
| T | chr19 | <i>ZNF260</i>     | 2.488754989 | 1.315424208  | 2.15E-05    | 0.000628517 | Up   |
| T | chr2  | <i>KANSL1L</i>    | 2.087769783 | 1.061962636  | 6.03E-05    | 0.00135951  | Up   |
| T | chr6  | <i>BCKDHB</i>     | 2.480823049 | 1.310818835  | 0.006622749 | 0.037961503 | Up   |
| T | chr7  | <i>KLHL7</i>      | 1.914683933 | 0.937106259  | 0.002011957 | 0.016771876 | Up   |

|   |       |                     |             |              |             |             |      |
|---|-------|---------------------|-------------|--------------|-------------|-------------|------|
| T | chr3  | <i>APPL1</i>        | 1.681938827 | 0.750125235  | 0.005516551 | 0.033349828 | Up   |
| T | chr19 | <i>GRIK5</i>        | 0.245692623 | -2.025073553 | 0.000453669 | 0.005825359 | Down |
| T | chr11 | <i>DSCAML1</i>      | 0.043321203 | -4.528782873 | 6.39E-05    | 0.001409725 | Down |
| T | chr17 | <i>CTDNBP1</i>      | 0.39745251  | -1.331145606 | 0.002250033 | 0.018090924 | Down |
| T | chr2  | <i>NOP58</i>        | 2.244144668 | 1.166165682  | 0.000425609 | 0.005580402 | Up   |
| T | chr3  | <i>ZNF654</i>       | 2.746737756 | 1.457719176  | 1.39E-06    | 8.41E-05    | Up   |
| T | chr4  | <i>SLC26A1</i>      | Inf         | Inf          | 0.008017842 | 0.043259207 | Up   |
| T | chr15 | <i>CTDSPL2</i>      | 2.0273005   | 1.019559951  | 4.15E-05    | 0.001033183 | Up   |
| T | chr12 | <i>TMEM194A</i>     | 2.273254982 | 1.184759514  | 0.007484365 | 0.041092665 | Up   |
| T | chr19 | <i>ZNF728</i>       | Inf         | Inf          | 0.001468484 | 0.013616091 | Up   |
| T | chr4  | <i>PDS5A</i>        | 1.860780484 | 0.895907871  | 0.000163383 | 0.002779004 | Up   |
| T | chr9  | <i>FAM122A</i>      | 0.461374111 | -1.115991042 | 0.001716015 | 0.01510603  | Down |
| T | chr20 | <i>SULF2</i>        | 0.296853281 | -1.752178036 | 0.003510926 | 0.02451982  | Down |
| T | chr8  | <i>UBE2V2</i>       | 2.169668259 | 1.117474472  | 0.004344854 | 0.02832732  | Up   |
| T | chr14 | <i>CEBPE</i>        | 0.187871577 | -2.412181275 | 0.009561913 | 0.049054155 | Down |
| T | chr9  | <i>VLDLR</i>        | 2.157664904 | 1.109470825  | 0.000951261 | 0.009896453 | Up   |
| T | chr5  | <i>PDLIM7</i>       | 0.351591581 | -1.508027569 | 0.002153152 | 0.017567245 | Down |
| T | chr6  | <i>ZBTB22</i>       | 0.475873759 | -1.071349192 | 0.002504846 | 0.019439748 | Down |
| T | chr22 | <i>MKL1</i>         | 0.36084229  | -1.470559665 | 0.000436775 | 0.005669824 | Down |
| T | chr1  | <i>CDC42BPA</i>     | 2.135701157 | 1.094709788  | 7.12E-05    | 0.00154519  | Up   |
| T | chr2  | <i>PNPT1</i>        | 2.09659053  | 1.068045127  | 0.001027543 | 0.010472914 | Up   |
| T | chr10 | <i>LOC100192204</i> | 0.093253917 | -3.422691872 | 1.06E-05    | 0.000376935 | Down |
| T | chr10 | <i>PCGF5</i>        | 1.810285711 | 0.856217411  | 0.003834195 | 0.026025446 | Up   |
| T | chr7  | <i>BLVRA</i>        | 4.900665004 | 2.292977532  | 0.008366722 | 0.044571995 | Up   |
| T | chr5  | <i>HSPA9</i>        | 1.89666299  | 0.923463355  | 0.003940075 | 0.02645508  | Up   |
| T | chr22 | <i>TXN2</i>         | 0.248613147 | -2.008025507 | 1.02E-07    | 1.09E-05    | Down |
| T | chr11 | <i>VWA5A</i>        | 2.05025583  | 1.03580394   | 0.004186231 | 0.027484181 | Up   |
| T | chr2  | <i>TEX261</i>       | 0.523705186 | -0.933173203 | 0.00207951  | 0.017182418 | Down |
| T | chr7  | <i>FKBP9L</i>       | Inf         | Inf          | 0.00475984  | 0.03004203  | Up   |
| T | chr1  | <i>FAM189B</i>      | 0.315693951 | -1.663401479 | 0.00073695  | 0.008231814 | Down |
| T | chr2  | <i>MFSD2B</i>       | 0.269441114 | -1.891958088 | 7.92E-06    | 0.000307269 | Down |
| T | chr6  | <i>SRF</i>          | 0.407754449 | -1.294227476 | 1.85E-06    | 0.000105451 | Down |
| T | chr4  | <i>CENPE</i>        | 2.427239981 | 1.279316754  | 6.05E-05    | 0.00135951  | Up   |
| T | chr20 | <i>SLX4IP</i>       | 5.516643871 | 2.46379085   | 0.000536253 | 0.006526084 | Up   |
| T | chr17 | <i>CBX4</i>         | 0.504596496 | -0.986797906 | 0.000747705 | 0.008308822 | Down |
| T | chr12 | <i>NACA</i>         | 2.161309612 | 1.111905756  | 0.000382919 | 0.00516604  | Up   |
| T | chr10 | <i>C10orf118</i>    | 2.665240998 | 1.414265991  | 0.009684995 | 0.049463689 | Up   |
| T | chr16 | <i>ZC3H7A</i>       | 1.765670179 | 0.820215878  | 0.002105833 | 0.017311088 | Up   |
| T | chr12 | <i>CHPT1</i>        | 3.132795447 | 1.647450573  | 0.000257402 | 0.003868741 | Up   |
| T | chr2  | <i>WDR12</i>        | 1.676256534 | 0.745242956  | 0.006588868 | 0.037867124 | Up   |
| T | chr16 | <i>GPR97</i>        | 0.208660467 | -2.260770801 | 7.90E-08    | 8.81E-06    | Down |
| T | chr17 | <i>PGS1</i>         | 0.55103441  | -0.859785684 | 0.009794719 | 0.049817506 | Down |
| T | chr22 | <i>TFIP11</i>       | 0.484901486 | -1.044236421 | 0.004611404 | 0.029447073 | Down |
| T | chr8  | <i>EPHX2</i>        | 0.078765824 | -3.666286396 | 0.007267205 | 0.040432404 | Down |

|   |       |                 |             |              |             |             |      |
|---|-------|-----------------|-------------|--------------|-------------|-------------|------|
| T | chr3  | <i>TRA2B</i>    | 1.698692064 | 0.764424347  | 0.003851406 | 0.026087976 | Up   |
| T | chr11 | <i>CCDC88B</i>  | 0.256286593 | -1.964170086 | 8.38E-06    | 0.000318817 | Down |
| T | chr5  | <i>ERAP1</i>    | 2.007686043 | 1.005533682  | 7.35E-05    | 0.001569715 | Up   |
| T | chr14 | <i>PPP1R36</i>  | 0.048599869 | -4.362903766 | 0.002660264 | 0.020236619 | Down |
| T | chr12 | <i>CD69</i>     | 0.175674831 | -2.509020582 | 0.000461911 | 0.005900721 | Down |
| T | chr5  | <i>CAST</i>     | 3.625287841 | 1.858095547  | 4.79E-05    | 0.001139665 | Up   |
| T | chr2  | <i>NBEAL1</i>   | 2.083630444 | 1.059099422  | 0.000248872 | 0.003766573 | Up   |
| T | chr3  | <i>KLHL24</i>   | 1.637358167 | 0.711369941  | 0.003794162 | 0.025807424 | Up   |
| T | chr6  | <i>RHAG</i>     | 0.152898365 | -2.709355118 | 0.00217056  | 0.017621109 | Down |
| T | chr17 | <i>SCO1</i>     | 6.344007317 | 2.665394435  | 0.000453646 | 0.005825359 | Up   |
| T | chr15 | <i>RPLP1</i>    | 0.219037193 | -2.190752228 | 4.01E-10    | 1.05E-07    | Down |
| T | chr11 | <i>SLC35C1</i>  | 0.303726712 | -1.719154299 | 0.003251972 | 0.023233967 | Down |
| T | chr1  | <i>CSDE1</i>    | 1.838142378 | 0.878248519  | 0.000860944 | 0.009214006 | Up   |
| T | chr6  | <i>TDP2</i>     | 3.238739187 | 1.695432294  | 4.97E-07    | 3.75E-05    | Up   |
| T | chr11 | <i>RPS13</i>    | 1.679098312 | 0.747686704  | 0.006763888 | 0.038528153 | Up   |
| T | chr7  | <i>GNA12</i>    | 0.508634807 | -0.975297901 | 0.001985512 | 0.016615135 | Down |
| T | chr1  | <i>CENPF</i>    | 2.32847969  | 1.219388298  | 0.00026971  | 0.003975866 | Up   |
| T | chr19 | <i>ZNF296</i>   | 0.298239037 | -1.745458986 | 0.008703521 | 0.045970092 | Down |
| T | chr12 | <i>EMP1</i>     | 0.36031223  | -1.472680474 | 0.003946292 | 0.026469577 | Down |
| T | chr14 | <i>SNW1</i>     | 2.299282329 | 1.201183626  | 0.000233269 | 0.003588707 | Up   |
| T | chr9  | <i>PPP6C</i>    | 1.73258662  | 0.792927481  | 0.002403284 | 0.018853427 | Up   |
| T | chr12 | <i>CCNT1</i>    | 1.764499419 | 0.819258955  | 0.004425588 | 0.028710207 | Up   |
| T | chr1  | <i>CEP85</i>    | 2.253571158 | 1.172213005  | 0.001213399 | 0.011836165 | Up   |
| T | chr9  | <i>FAM125B</i>  | 0.317905626 | -1.653329547 | 1.87E-06    | 0.00010592  | Down |
| T | chr8  | <i>CNOT7</i>    | 1.917768408 | 0.939428509  | 0.001558392 | 0.014124474 | Up   |
| T | chr22 | <i>SUN2</i>     | 0.378642607 | -1.401091334 | 1.55E-08    | 2.29E-06    | Down |
| T | chrX  | <i>CD99L2</i>   | Inf         | Inf          | 0.002218408 | 0.01790925  | Up   |
| T | chr16 | <i>ATP6VOC</i>  | 0.207518811 | -2.268685977 | 5.18E-12    | 2.50E-09    | Down |
| T | chr19 | <i>MAP4K1</i>   | 0.549593755 | -0.863562485 | 0.004841911 | 0.030398253 | Down |
| T | chr3  | <i>PHLDB2</i>   | 5.384796207 | 2.428891745  | 5.38E-05    | 0.00125078  | Up   |
| T | chr1  | <i>FAF1</i>     | 1.968436041 | 0.977049837  | 0.000133245 | 0.002421043 | Up   |
| T | chr19 | <i>DEDD2</i>    | 0.227254153 | -2.137621434 | 1.12E-06    | 7.07E-05    | Down |
| T | chr11 | <i>PUS3</i>     | 1.942092743 | 0.957612097  | 0.00231175  | 0.018368799 | Up   |
| T | chr12 | <i>RSRC2</i>    | 2.266835507 | 1.180679705  | 0.000131348 | 0.002399956 | Up   |
| T | chr12 | <i>EEA1</i>     | 2.116862612 | 1.081927639  | 0.000356061 | 0.004905145 | Up   |
| T | chr1  | <i>DENND4B</i>  | 0.375414451 | -1.413443908 | 7.09E-06    | 0.000285103 | Down |
| T | chr1  | <i>DNAJB4</i>   | 2.133065516 | 1.092928278  | 0.000839289 | 0.009041588 | Up   |
| T | chr14 | <i>SNX6</i>     | 1.743218786 | 0.801753649  | 0.009058906 | 0.047159812 | Up   |
| T | chr3  | <i>CSRNP1</i>   | 0.294727704 | -1.762545416 | 0.000722798 | 0.008131986 | Down |
| T | chr19 | <i>PRSS57</i>   | 0.081519724 | -3.61670703  | 0.000378041 | 0.005110795 | Down |
| T | chr3  | <i>CRBN</i>     | 2.686191718 | 1.425562276  | 0.000203446 | 0.003236777 | Up   |
| T | chr2  | <i>APOB</i>     | 0.142450177 | -2.811470681 | 0.006516855 | 0.03756505  | Down |
| T | chr6  | <i>SLC16A10</i> | 0.350073897 | -1.514268601 | 2.87E-05    | 0.000771048 | Down |
| T | chr19 | <i>DOCK6</i>    | 0.306532957 | -1.705885901 | 0.008008252 | 0.043236869 | Down |

|   |       |                 |              |              |             |             |      |
|---|-------|-----------------|--------------|--------------|-------------|-------------|------|
| T | chr2  | <i>PIGF</i>     | 17.54471837  | 4.132964885  | 0.00043075  | 0.005613951 | Up   |
| T | chr9  | <i>LHX2</i>     | 0            | #NAME?       | 0.000842379 | 0.009062579 | Down |
| T | chr12 | <i>ST8SIA1</i>  | 0.174173726  | -2.521401081 | 1.41E-05    | 0.000458666 | Down |
| T | chr10 | <i>TACC2</i>    | 0.462766035  | -1.111645114 | 0.006182928 | 0.036301746 | Down |
| T | chr20 | <i>SNORD12</i>  | 0.324124002  | -1.625382235 | 0.00436146  | 0.028393018 | Down |
| T | chr3  | <i>MUC13</i>    | Inf          | Inf          | 0.000585919 | 0.00696935  | Up   |
| T | chr2  | <i>ZNF513</i>   | 0.292161468  | -1.775162173 | 1.58E-06    | 9.32E-05    | Down |
| T | chr17 | <i>MYO18A</i>   | 0.469600492  | -1.090494173 | 0.001946219 | 0.016359775 | Down |
| T | chr14 | <i>ALDH6A1</i>  | 2.750349397  | 1.459614906  | 0.001213919 | 0.011836165 | Up   |
| T | chr11 | <i>RPLP2</i>    | 0.5111717227 | -0.966581291 | 0.009547152 | 0.049016982 | Down |
| T | chr11 | <i>GRIK4</i>    | 0.120104077  | -3.057642975 | 0.008567741 | 0.045473859 | Down |
| T | chr14 | <i>PRPF39</i>   | 2.193943681  | 1.133526492  | 1.09E-05    | 0.000381439 | Up   |
| T | chr1  | <i>B3GALT2</i>  | 2.369904883  | 1.244829157  | 0.001110131 | 0.011114942 | Up   |
| T | chr11 | <i>PNPLA2</i>   | 0.23772041   | -2.072662318 | 7.81E-09    | 1.29E-06    | Down |
| T | chr20 | <i>SNX21</i>    | 0.185064187  | -2.433902354 | 0.008661265 | 0.04580254  | Down |
| T | chr12 | <i>PCBP2</i>    | 0.595523027  | -0.747770801 | 0.00573484  | 0.034351113 | Down |
| T | chr15 | <i>SCAMP2</i>   | 0.376952002  | -1.40754726  | 2.47E-06    | 0.000128498 | Down |
| T | chr2  | <i>RFTN2</i>    | 0.237609691  | -2.073334418 | 0.002250619 | 0.018090924 | Down |
| T | chr14 | <i>TDP1</i>     | 0.465736822  | -1.102413147 | 0.001455364 | 0.013532917 | Down |
| T | chr9  | <i>CNTRL</i>    | 1.720672055  | 0.782972158  | 0.002098048 | 0.017283491 | Up   |
| T | chr13 | <i>DIS3</i>     | 2.34442259   | 1.229232643  | 1.82E-05    | 0.000558991 | Up   |
| T | chr20 | <i>PPP1R16B</i> | 0.388256778  | -1.364916984 | 0.004553763 | 0.029222031 | Down |
| T | chr12 | <i>SUOX</i>     | 0.438374132  | -1.189765427 | 0.007899411 | 0.042779459 | Down |
| T | chr19 | <i>PIK3R2</i>   | 0.491837035  | -1.023747722 | 0.005322665 | 0.032433202 | Down |
| T | chr7  | <i>GIGYF1</i>   | 0.326448313  | -1.615073508 | 0.003334335 | 0.023644649 | Down |
| T | chr5  | <i>TTC1</i>     | 2.682541872  | 1.423600691  | 0.002629601 | 0.020085347 | Up   |
| T | chr18 | <i>TTC39C</i>   | 3.576312658  | 1.838472869  | 0.005815907 | 0.034693333 | Up   |
| T | chr2  | <i>HAT1</i>     | 1.92668392   | 0.946119912  | 0.001328628 | 0.012717007 | Up   |
| T | chr5  | <i>FER</i>      | 3.286308411  | 1.716467879  | 0.000110905 | 0.002115296 | Up   |
| T | chr1  | <i>IL6R</i>     | 0.092306919  | -3.437417392 | 4.74E-05    | 0.001135863 | Down |
| T | chr21 | <i>BRWD1</i>    | 1.664142648  | 0.734779104  | 0.006601358 | 0.037888835 | Up   |
| T | chr1  | <i>SH3BGRL3</i> | 0.211084064  | -2.244110431 | 7.67E-19    | 1.67E-15    | Down |
| T | chr19 | <i>ZNF787</i>   | 0.242844479  | -2.041895409 | 2.58E-05    | 0.000713194 | Down |
| T | chr1  | <i>GNB1</i>     | 0.481718897  | -1.053736575 | 2.00E-05    | 0.000595991 | Down |
| T | chr5  | <i>MAPK9</i>    | 1.705913546  | 0.770544534  | 0.004030958 | 0.02676228  | Up   |
| T | chr10 | <i>TNKS2</i>    | 1.581698824  | 0.661474918  | 0.007471446 | 0.041092665 | Up   |
| T | chr20 | <i>PIGT</i>     | 0.323255886  | -1.629251454 | 5.84E-06    | 0.00024659  | Down |
| T | chr20 | <i>HM13</i>     | 0.640377475  | -0.643005532 | 0.006854205 | 0.038840563 | Down |
| T | chr8  | <i>FAM91A1</i>  | 1.855395282  | 0.891726578  | 0.002228691 | 0.017970027 | Up   |
| T | chr6  | <i>GNL1</i>     | 0.489927539  | -1.029359708 | 0.001130235 | 0.011307547 | Down |
| T | chr14 | <i>DNAAF2</i>   | 3.253203242  | 1.701860957  | 0.004021743 | 0.026719436 | Up   |
| T | chr2  | <i>HNRPLL</i>   | 1.791811973  | 0.841419254  | 0.001690521 | 0.014931982 | Up   |
| T | chr21 | <i>SAMSN1</i>   | 2.356610311  | 1.236713215  | 0.001148903 | 0.011424228 | Up   |
| T | chr19 | <i>PRMT1</i>    | 0.471829566  | -1.083662272 | 1.16E-05    | 0.000402145 | Down |

|   |       |                 |             |              |             |             |      |
|---|-------|-----------------|-------------|--------------|-------------|-------------|------|
| T | chr1  | <i>C1orf112</i> | 2.965784398 | 1.568413723  | 0.00030306  | 0.004349523 | Up   |
| T | chr1  | <i>C1orf114</i> | Inf         | Inf          | 0.000642844 | 0.007487987 | Up   |
| T | chr6  | <i>POLH</i>     | 2.450584422 | 1.293125848  | 0.00033175  | 0.004663151 | Up   |
| T | chr4  | <i>PLK4</i>     | 2.031124423 | 1.022278619  | 0.000625593 | 0.007326292 | Up   |
| T | chr12 | <i>RASAL1</i>   | 0.132602943 | -2.914815302 | 0.000146305 | 0.002589826 | Down |
| T | chr7  | <i>ETV1</i>     | 0.244367609 | -2.032875027 | 0.001555929 | 0.014115892 | Down |
| T | chr12 | <i>CDK17</i>    | 1.917021249 | 0.938866329  | 0.000149703 | 0.002621519 | Up   |
| T | chrX  | <i>TTC3P1</i>   | Inf         | Inf          | 0.000123477 | 0.002281695 | Up   |
| T | chr3  | <i>SACM1L</i>   | 1.99892325  | 0.99922308   | 0.000747614 | 0.008308822 | Up   |
| T | chr11 | <i>PGAP2</i>    | 0.440794672 | -1.181821308 | 7.26E-05    | 0.001558692 | Down |
| T | chr5  | <i>LYSMD3</i>   | Inf         | Inf          | 3.02E-07    | 2.59E-05    | Up   |
| T | chr10 | <i>DCLRE1A</i>  | 5.983695087 | 2.581036661  | 0.003751129 | 0.025612886 | Up   |
| T | chr12 | <i>GCN1L1</i>   | 0.347780626 | -1.523750529 | 1.35E-05    | 0.000447402 | Down |
| T | chr19 | <i>FKRP</i>     | 0.278781073 | -1.842795476 | 0.000268466 | 0.003966484 | Down |
| T | chr2  | <i>ITSN2</i>    | 1.693711967 | 0.76018855   | 0.002031745 | 0.016872151 | Up   |
| T | chr21 | <i>UBASH3A</i>  | 0.441944198 | -1.178063874 | 0.00126317  | 0.012200628 | Down |
| T | chr19 | <i>ZNF791</i>   | 2.217712502 | 1.149072351  | 0.001739568 | 0.015237203 | Up   |
| T | chr6  | <i>TOMM6</i>    | 0.347553044 | -1.524694916 | 0.000339913 | 0.004732658 | Down |
| T | chr19 | <i>SNORD33</i>  | 0.222052664 | -2.171026218 | 0.002392877 | 0.018805705 | Down |
| T | chr10 | <i>AKR1C3</i>   | 9.3597444   | 3.226469133  | 0.001635702 | 0.014596014 | Up   |
| T | chr7  | <i>WDR91</i>    | 0.461741712 | -1.11484203  | 0.000155082 | 0.002676196 | Down |
| T | chr15 | <i>SPRED1</i>   | 1.693310206 | 0.759846292  | 0.003260982 | 0.023260128 | Up   |
| T | chrX  | <i>PLP2</i>     | 0.504301964 | -0.987640252 | 0.006598537 | 0.037888835 | Down |
| T | chr2  | <i>STEAP3</i>   | 0.336422788 | -1.571652665 | 0.003781977 | 0.02573796  | Down |
| T | chr1  | <i>FUBP1</i>    | 2.28301502  | 1.190940351  | 2.52E-05    | 0.00070524  | Up   |
| T | chr6  | <i>MICAL1</i>   | 0.519268557 | -0.945447226 | 0.002484361 | 0.019303735 | Down |
| T | chr12 | <i>NCOR2</i>    | 0.296373819 | -1.754510088 | 0.004368315 | 0.028423463 | Down |
| T | chr7  | <i>SSBP1</i>    | 2.498758562 | 1.32121151   | 0.001837458 | 0.015745665 | Up   |
| T | chrX  | <i>MTMR1</i>    | 2.513993338 | 1.329980826  | 9.65E-06    | 0.000351703 | Up   |
| T | chr19 | <i>EML2</i>     | 0.512698174 | -0.963818334 | 0.001745264 | 0.015270765 | Down |
| T | chr14 | <i>GOLGA5</i>   | 1.98619708  | 0.990008781  | 0.005123805 | 0.031569414 | Up   |
| T | chr8  | <i>RAB2A</i>    | 1.766817597 | 0.821153106  | 0.001384511 | 0.013050818 | Up   |
| T | chr4  | <i>AP1AR</i>    | 2.509585788 | 1.327449264  | 0.002152402 | 0.017567245 | Up   |
| T | chr20 | <i>FER1L4</i>   | 0           | #NAME?       | 0.004464939 | 0.028841639 | Down |
| T | chr17 | <i>KIAA0753</i> | 2.89077302  | 1.531455334  | 0.002925128 | 0.021535674 | Up   |
| T | chr5  | <i>LMBRD2</i>   | 2.271054941 | 1.183362608  | 0.001544419 | 0.014050555 | Up   |
| T | chr15 | <i>PSMA4</i>    | 2.67656193  | 1.420381034  | 0.005123123 | 0.031569414 | Up   |
| T | chr6  | <i>DEF6</i>     | 0.609248913 | -0.714896324 | 0.007487143 | 0.041092665 | Down |
| T | chr17 | <i>CLUH</i>     | 0.611158739 | -0.710380948 | 0.003894777 | 0.026297921 | Down |
| T | chr2  | <i>ST3GAL5</i>  | 0.342635465 | -1.545253608 | 0.007482943 | 0.041092665 | Down |
| T | chr20 | <i>CSE1L</i>    | 1.619411544 | 0.695469667  | 0.004836884 | 0.030394262 | Up   |
| T | chr3  | <i>IL1RAP</i>   | 5.848239457 | 2.548002384  | 2.58E-06    | 0.000132011 | Up   |
| T | chr2  | <i>WDR75</i>    | 1.918614995 | 0.940065238  | 0.000955977 | 0.00992968  | Up   |
| T | chr9  | <i>AKNA</i>     | 0.470756097 | -1.086948315 | 0.006251815 | 0.036558124 | Down |

|   |       |                |             |              |             |             |      |
|---|-------|----------------|-------------|--------------|-------------|-------------|------|
| T | chr11 | <i>INTS4</i>   | 2.718292954 | 1.442700946  | 4.34E-06    | 0.000203082 | Up   |
| T | chr11 | <i>INTS5</i>   | 0.371355698 | -1.429126382 | 6.46E-08    | 7.32E-06    | Down |
| T | chr10 | <i>ZNF518A</i> | 1.864122682 | 0.89849681   | 0.004022457 | 0.026719436 | Up   |
| T | chr5  | <i>SKIV2L2</i> | 1.72566592  | 0.787153194  | 0.002686473 | 0.02034111  | Up   |
| T | chr14 | <i>PSMA3</i>   | 1.890836778 | 0.919024831  | 0.001588125 | 0.014298604 | Up   |
| T | chr4  | <i>HERC3</i>   | 1.829397832 | 0.871368847  | 0.007908062 | 0.042808536 | Up   |
| T | chr2  | <i>WDFY1</i>   | 0.511772434 | -0.966425655 | 0.001855269 | 0.015829846 | Down |
| T | chr4  | <i>HERC6</i>   | 2.97331771  | 1.572073629  | 0.000566739 | 0.006808173 | Up   |
| T | chr1  | <i>TRIM11</i>  | 0.38049675  | -1.394043964 | 0.002772415 | 0.020809097 | Down |
| T | chr1  | <i>RPAP2</i>   | 3.530222495 | 1.819759113  | 0.006883881 | 0.038928094 | Up   |
| T | chr7  | <i>MACC1</i>   | 0.115634857 | -3.112351751 | 7.24E-05    | 0.001558692 | Down |
| T | chr3  | <i>RFC4</i>    | 1.840544755 | 0.880132831  | 0.0062899   | 0.036647452 | Up   |
| T | chr18 | <i>SLC14A1</i> | 0.439768971 | -1.185182278 | 0.000997476 | 0.010244601 | Down |
| T | chr13 | <i>AKAP11</i>  | 1.956078576 | 0.967964325  | 0.000508445 | 0.006305293 | Up   |
| T | chr1  | <i>ZRANB2</i>  | 2.760884357 | 1.46513046   | 0.000100935 | 0.001977166 | Up   |
| T | chr19 | <i>CD37</i>    | 0.449989854 | -1.152035621 | 0.000227432 | 0.003532231 | Down |
| T | chr1  | <i>CCDC18</i>  | 5.152424739 | 2.365251527  | 2.97E-08    | 4.03E-06    | Up   |
| T | chr10 | <i>UPF2</i>    | 1.601432087 | 0.679362618  | 0.007534564 | 0.041318166 | Up   |
| T | chr7  | <i>CAPZA2</i>  | 2.420144913 | 1.275093435  | 0.000620729 | 0.007302098 | Up   |
| T | chr4  | <i>SNORA26</i> | 0.09840551  | -3.345117088 | 3.49E-06    | 0.000168714 | Down |
| T | chr7  | <i>AGBL3</i>   | 5.373405534 | 2.425836723  | 0.009827835 | 0.04990811  | Up   |
| T | chr20 | <i>CASS4</i>   | 0.125481262 | -2.994456147 | 0.001047289 | 0.010643935 | Down |
| T | chr1  | <i>WDR78</i>   | Inf         | Inf          | 0.00921424  | 0.047775829 | Up   |
| T | chr8  | <i>KIF13B</i>  | 1.938775802 | 0.955145981  | 0.000899625 | 0.00951081  | Up   |
| T | chr15 | <i>COPS2</i>   | 1.856812182 | 0.892827893  | 0.007325387 | 0.040638767 | Up   |
| T | chr19 | <i>DCAF15</i>  | 0.546512305 | -0.871674117 | 0.005926169 | 0.035237286 | Down |
| T | chr11 | <i>SIDT2</i>   | 0.449021202 | -1.155144528 | 5.59E-06    | 0.000239809 | Down |
| T | chr2  | <i>GULP1</i>   | 4.129347282 | 2.045913756  | 0.005223567 | 0.031993737 | Up   |
| T | chr8  | <i>XKR6</i>    | 0.032399913 | -4.947866266 | 8.60E-09    | 1.38E-06    | Down |
| T | chr7  | <i>TTYH3</i>   | 0.248302672 | -2.009828308 | 0.000404881 | 0.005384374 | Down |
| T | chr2  | <i>DOCK10</i>  | 1.563554128 | 0.644829164  | 0.006505868 | 0.037522351 | Up   |
| T | chr17 | <i>PSMD3</i>   | 0.450822176 | -1.14936961  | 1.57E-05    | 0.000496649 | Down |
| T | chr9  | <i>ANP32B</i>  | 0.387187223 | -1.368896749 | 0.000262502 | 0.003920574 | Down |
| T | chr4  | <i>HADH</i>    | 0.364134556 | -1.457456437 | 3.64E-05    | 0.00092989  | Down |
| T | chr1  | <i>OSBPL9</i>  | 1.726280141 | 0.787666604  | 0.002013279 | 0.016772179 | Up   |
| T | chr1  | <i>PNRC2</i>   | 3.137819592 | 1.649762407  | 0.000264048 | 0.003925002 | Up   |
| T | chr6  | <i>DOPEY1</i>  | 1.723756293 | 0.785555819  | 0.002320895 | 0.018410972 | Up   |
| T | chr19 | <i>SF3A2</i>   | 0.245750745 | -2.024732306 | 1.74E-06    | 0.000100812 | Down |
| T | chr2  | <i>AUP1</i>    | 0.473564443 | -1.078367334 | 2.48E-05    | 0.000694959 | Down |
| T | chr22 | <i>PATZ1</i>   | 0.53198247  | -0.910549388 | 0.000428821 | 0.005600005 | Down |
| T | chr10 | <i>DOCK1</i>   | 2.34729556  | 1.23099951   | 0.000111592 | 0.002125304 | Up   |
| T | chr14 | <i>SLC7A8</i>  | 0.194809973 | -2.359860557 | 6.36E-08    | 7.32E-06    | Down |
| T | chr6  | <i>PEX6</i>    | 0.284843583 | -1.811758189 | 1.56E-08    | 2.29E-06    | Down |
| T | chr1  | <i>RCC2</i>    | 0.399207685 | -1.324788601 | 1.77E-07    | 1.71E-05    | Down |

|   |       |                   |             |              |             |             |      |
|---|-------|-------------------|-------------|--------------|-------------|-------------|------|
| T | chr1  | <i>PPFIA4</i>     | 0.37336525  | -1.421340437 | 0.006106193 | 0.03593207  | Down |
| T | chr2  | <i>PSD4</i>       | 0.410684935 | -1.283896068 | 2.47E-05    | 0.000694622 | Down |
| T | chr6  | <i>PTK7</i>       | 0.437598753 | -1.192319468 | 0.000725134 | 0.008136813 | Down |
| T | chr12 | <i>ESYT1</i>      | 0.491611342 | -1.024409895 | 0.001871413 | 0.015915549 | Down |
| T | chr3  | <i>UBA3</i>       | 1.826431999 | 0.869028041  | 0.002572894 | 0.019793408 | Up   |
| T | chr1  | <i>CTBS</i>       | 3.424922779 | 1.77607146   | 0.004005538 | 0.026677157 | Up   |
| T | chr10 | <i>ZNF248</i>     | 2.006349326 | 1.004572816  | 0.003380957 | 0.023867369 | Up   |
| T | chr11 | <i>CHORDC1</i>    | 2.899628192 | 1.535867921  | 0.003593491 | 0.024857201 | Up   |
| T | chr7  | <i>ARF5</i>       | 0.384954649 | -1.377239602 | 2.36E-07    | 2.11E-05    | Down |
| T | chr14 | <i>TMEM121</i>    | 0.0912591   | -3.453887766 | 4.25E-05    | 0.001050873 | Down |
| T | chr1  | <i>COG2</i>       | 6.43283348  | 2.685454344  | 1.84E-05    | 0.000560103 | Up   |
| T | chr20 | <i>EIF2S2</i>     | 2.523716857 | 1.335550059  | 0.002348163 | 0.018568202 | Up   |
| T | chr6  | <i>WTAP</i>       | 1.598316897 | 0.676553479  | 0.006952757 | 0.039181712 | Up   |
| T | chr2  | <i>EHBP1</i>      | 2.04248014  | 1.030322051  | 0.006898768 | 0.038990811 | Up   |
| T | chr1  | <i>FCER1G</i>     | 0.41598864  | -1.265383964 | 0.007144621 | 0.039918082 | Down |
| T | chr1  | <i>FAM102B</i>    | 0.434250568 | -1.203400358 | 5.93E-05    | 0.001346021 | Down |
| T | chr2  | <i>ROCK2</i>      | 2.200643065 | 1.137925165  | 4.81E-06    | 0.000217722 | Up   |
| T | chr10 | <i>EBF3</i>       | 0.017152895 | -5.865404106 | 4.61E-05    | 0.001114427 | Down |
| T | chr1  | <i>TRIM33</i>     | 1.704003711 | 0.768928478  | 0.00194     | 0.016318012 | Up   |
| T | chr1  | <i>ALDH4A1</i>    | 0.241402259 | -2.050488916 | 3.77E-05    | 0.0009486   | Down |
| T | chr11 | <i>ALDH3B1</i>    | 0.096269341 | -3.376779779 | 0.009034561 | 0.047070639 | Down |
| T | chr4  | <i>GUF1</i>       | 1.868830605 | 0.902135806  | 0.002958964 | 0.021688645 | Up   |
| T | chr16 | <i>CDIPT</i>      | 0.482446781 | -1.051558287 | 0.002476555 | 0.019266032 | Down |
| T | chr11 | <i>RAG2</i>       | 0.490354048 | -1.028104307 | 0.009370982 | 0.048417359 | Down |
| T | chr5  | <i>PAM</i>        | 1.964217513 | 0.973954699  | 0.000992261 | 0.010209015 | Up   |
| T | chr12 | <i>ATF7IP</i>     | 0.451418535 | -1.147462438 | 0.002556326 | 0.019687031 | Down |
| T | chr19 | <i>PLD3</i>       | 0.3922435   | -1.350178554 | 0.000196189 | 0.00315985  | Down |
| T | chr6  | <i>RAB44</i>      | 0.380507456 | -1.394003372 | 0.003159048 | 0.022730093 | Down |
| T | chr15 | <i>ZNF609</i>     | 0.431875631 | -1.211312182 | 0.006690877 | 0.038234885 | Down |
| T | chr12 | <i>ASUN</i>       | 1.846800293 | 0.885027866  | 0.001523142 | 0.013905463 | Up   |
| T | chr11 | <i>ACAD8</i>      | 3.128053863 | 1.645265355  | 0.000243301 | 0.003703746 | Up   |
| T | chr8  | <i>CSGALNACT1</i> | 2.571842529 | 1.362802311  | 0.001737995 | 0.015237203 | Up   |
| T | chr17 | <i>VAMP2</i>      | 0.340098936 | -1.555973604 | 0.000396358 | 0.005299042 | Down |
| T | chr9  | <i>CDK9</i>       | 0.348191279 | -1.522048027 | 5.38E-05    | 0.00125078  | Down |
| T | chrX  | <i>BCORL1</i>     | 0.399706839 | -1.322985837 | 0.008678874 | 0.045877062 | Down |
| T | chr1  | <i>EPB41</i>      | 1.779382748 | 0.83137687   | 0.001718907 | 0.015115095 | Up   |
| T | chr7  | <i>ACTB</i>       | 0.522792889 | -0.935688577 | 2.80E-05    | 0.000756677 | Down |
| T | chr7  | <i>ELFN1</i>      | 0.028322564 | -5.141904319 | 0.003305015 | 0.023487442 | Down |
| T | chr15 | <i>TMEM87A</i>    | 1.749138518 | 0.806644544  | 0.004094566 | 0.027046938 | Up   |
| T | chr2  | <i>SGOL2</i>      | 6.525846431 | 2.706165038  | 0.002152784 | 0.017567245 | Up   |
| T | chr6  | <i>ABHD16A</i>    | 0.57439386  | -0.799887768 | 0.008389653 | 0.044655817 | Down |
| T | chr22 | <i>ASCC2</i>      | 0.609790099 | -0.71361537  | 0.009634388 | 0.049290286 | Down |
| T | chrX  | <i>SUPT20HL2</i>  | 0.02985157  | -5.066049396 | 1.02E-10    | 3.11E-08    | Down |
| T | chr1  | <i>ELAVL4</i>     | 0.087479764 | -3.514906859 | 0.000843321 | 0.009062579 | Down |

|   |       |                 |             |              |             |             |      |
|---|-------|-----------------|-------------|--------------|-------------|-------------|------|
| T | chr3  | <i>DNAJC13</i>  | 1.554043732 | 0.636027103  | 0.009794574 | 0.049817506 | Up   |
| T | chr16 | <i>ABCA3</i>    | 0.425220949 | -1.233715419 | 9.11E-05    | 0.001831829 | Down |
| T | chr13 | <i>RCBTB1</i>   | 2.29343339  | 1.197509007  | 0.000979647 | 0.010135195 | Up   |
| T | chr19 | <i>FBL</i>      | 0.459159386 | -1.122933059 | 3.44E-06    | 0.000167384 | Down |
| T | chr3  | <i>KIF15</i>    | 2.336434464 | 1.224308571  | 0.000105002 | 0.002034676 | Up   |
| T | chr18 | <i>KCTD1</i>    | 0.550395408 | -0.861459661 | 0.003518694 | 0.024521841 | Down |
| T | chr1  | <i>AGBL4</i>    | 0.041657031 | -4.585296187 | 0.009073675 | 0.047217858 | Down |
| T | chr10 | <i>ACSL5</i>    | 1.8569459   | 0.892931784  | 0.007031093 | 0.039435787 | Up   |
| T | chrX  | <i>LONRF3</i>   | 3.045671656 | 1.606760418  | 0.000259043 | 0.003880001 | Up   |
| T | chr1  | <i>SNX7</i>     | 14.62872623 | 3.87073225   | 0.002284389 | 0.018227606 | Up   |
| T | chr6  | <i>C6orf170</i> | 6.829185217 | 2.771713462  | 7.92E-07    | 5.44E-05    | Up   |
| T | chr7  | <i>AIMP2</i>    | 0.416535165 | -1.263489799 | 0.006865544 | 0.03887495  | Down |
| T | chr1  | <i>EPRS</i>     | 1.752195589 | 0.809163825  | 0.00102619  | 0.010467297 | Up   |
| T | chr11 | <i>PRG2</i>     | Inf         | Inf          | 0.002998291 | 0.021876789 | Up   |
| T | chr22 | <i>PLA2G6</i>   | 0.354832445 | -1.494790161 | 4.19E-05    | 0.001040258 | Down |
| T | chrX  | <i>IQSEC2</i>   | 0.385710192 | -1.374410826 | 0.001898282 | 0.016076821 | Down |
| T | chr3  | <i>CLDND1</i>   | 0.496679215 | -1.00961372  | 0.002745788 | 0.020675597 | Down |
| T | chr2  | <i>KIF1A</i>    | 0.246054452 | -2.022950474 | 0.001763335 | 0.015346545 | Down |
| T | chr1  | <i>ATP1A1</i>   | 0.625526892 | -0.676856185 | 0.002769107 | 0.020797793 | Down |
| T | chr1  | <i>ATP1A2</i>   | 0.502002582 | -0.994233309 | 0.00219315  | 0.017779273 | Down |
| T | chr2  | <i>CNTNAP5</i>  | 0.121456473 | -3.041488715 | 0.001304947 | 0.012527105 | Down |
| T | chr1  | <i>ATP1A4</i>   | 0.342465671 | -1.545968715 | 4.33E-07    | 3.42E-05    | Down |
| T | chr3  | <i>RAB5A</i>    | 1.801124021 | 0.848897525  | 0.007751923 | 0.042190899 | Up   |
| T | chr16 | <i>SNORA46</i>  | 0.069421995 | -3.848463364 | 1.35E-06    | 8.19E-05    | Down |
| T | chr1  | <i>PIAS3</i>    | 0.390383008 | -1.357037835 | 0.000154968 | 0.002676196 | Down |
| T | chr5  | <i>FAM53C</i>   | 0.380472279 | -1.394136751 | 1.48E-06    | 8.80E-05    | Down |
| T | chr19 | <i>CLPTM1</i>   | 0.539753586 | -0.889627171 | 0.000487292 | 0.006117336 | Down |
| T | chr2  | <i>BUB1</i>     | 3.329470411 | 1.735292719  | 1.05E-06    | 6.71E-05    | Up   |
| T | chr1  | <i>INADL</i>    | 2.243529961 | 1.16577045   | 0.003283631 | 0.023396093 | Up   |
| T | chrX  | <i>USP9X</i>    | 1.665105327 | 0.735613438  | 0.00167012  | 0.014811953 | Up   |
| T | chr3  | <i>ALG3</i>     | 0.245226365 | -2.027813996 | 9.43E-06    | 0.000346628 | Down |
| T | chr14 | <i>TM9SF1</i>   | 0.54684984  | -0.870783359 | 0.000511584 | 0.006332184 | Down |
| T | chrX  | <i>RRAGB</i>    | 2.845994717 | 1.508932984  | 4.96E-05    | 0.001172676 | Up   |
| T | chr7  | <i>CALU</i>     | 1.991349009 | 0.993746094  | 0.000211745 | 0.003344337 | Up   |
| T | chr9  | <i>PIGO</i>     | 0.301768146 | -1.72848757  | 1.32E-05    | 0.00043963  | Down |
| T | chr11 | <i>CYBASC3</i>  | 0.360637971 | -1.471376789 | 0.000437606 | 0.005674957 | Down |
| T | chr18 | <i>RNMT</i>     | 1.932756564 | 0.950659938  | 0.004881548 | 0.030573533 | Up   |
| T | chr5  | <i>TENM2</i>    | 0.014906613 | -6.067903738 | 1.41E-05    | 0.000459643 | Down |
| T | chr9  | <i>ZNF367</i>   | 2.25829607  | 1.175234641  | 0.00038387  | 0.00517352  | Up   |
| T | chr9  | <i>TESK1</i>    | 0.354932172 | -1.494384746 | 0.000176159 | 0.002923876 | Down |
| T | chr5  | <i>SLC12A2</i>  | 1.836411664 | 0.8768895    | 0.005132293 | 0.031569414 | Up   |
| T | chr17 | <i>PKD2</i>     | 0.267424754 | -1.902795078 | 5.82E-06    | 0.00024659  | Down |
| T | chr16 | <i>INO80E</i>   | 0.474542012 | -1.075392278 | 0.002800126 | 0.02093271  | Down |
| T | chr4  | <i>TENM3</i>    | 0.031469515 | -4.989901226 | 6.40E-05    | 0.001409725 | Down |

|   |       |                  |             |              |             |             |      |
|---|-------|------------------|-------------|--------------|-------------|-------------|------|
| T | chr12 | <i>H2AFJ</i>     | 0.162882812 | -2.618093722 | 4.91E-17    | 9.15E-14    | Down |
| T | chr11 | <i>H2AFX</i>     | 0.365700314 | -1.45126623  | 4.04E-05    | 0.001007792 | Down |
| T | chr8  | <i>LOXL2</i>     | 0.321245586 | -1.638251464 | 0.001722056 | 0.015128585 | Down |
| T | chr8  | <i>HEATR7A</i>   | 0.157347577 | -2.667973131 | 0.001179103 | 0.011627038 | Down |
| T | chr19 | <i>PGLS</i>      | 0.403235344 | -1.310305995 | 0.007678456 | 0.041843414 | Down |
| T | chr16 | <i>SIAH1</i>     | 3.605215692 | 1.850085575  | 0.001787565 | 0.015516015 | Up   |
| T | chr9  | <i>SMU1</i>      | 1.710714821 | 0.77459928   | 0.00655097  | 0.037699141 | Up   |
| T | chr7  | <i>ZMIZ2</i>     | 0.281013774 | -1.83128725  | 6.72E-05    | 0.001473011 | Down |
| T | chr7  | <i>AKAP9</i>     | 1.849490528 | 0.887127912  | 0.001602897 | 0.01437209  | Up   |
| T | chr21 | <i>SIK1</i>      | 0.342181607 | -1.547165882 | 2.26E-05    | 0.000652849 | Down |
| T | chr7  | <i>LANCL2</i>    | 2.216634452 | 1.148370873  | 0.003766844 | 0.025661744 | Up   |
| T | chr1  | <i>TRNAU1AP</i>  | 1.86833017  | 0.90174943   | 0.005152534 | 0.031647813 | Up   |
| T | chr9  | <i>NOTCH1</i>    | 0.269606898 | -1.891070688 | 9.21E-06    | 0.000340555 | Down |
| T | chr3  | <i>RAB7A</i>     | 0.5243487   | -0.931401549 | 0.001088808 | 0.010943444 | Down |
| T | chr7  | <i>TBXAS1</i>    | 2.076544733 | 1.054184951  | 0.001207889 | 0.011803838 | Up   |
| T | chr2  | <i>XDH</i>       | 0.358785274 | -1.478807418 | 0.001515804 | 0.013848166 | Down |
| T | chr2  | <i>CCDC88A</i>   | 2.76460421  | 1.467072954  | 1.85E-07    | 1.76E-05    | Up   |
| T | chr2  | <i>SLC4A5</i>    | 0           | #NAME?       | 0.000128491 | 0.002351041 | Down |
| T | chr1  | <i>RSBN1</i>     | 1.728757482 | 0.789735495  | 0.001552299 | 0.014112401 | Up   |
| T | chr15 | <i>MAN2A2</i>    | 0.418142218 | -1.257934382 | 0.002841026 | 0.021155268 | Down |
| T | chr1  | <i>SLC41A1</i>   | 0.540078866 | -0.888757999 | 0.004193822 | 0.027507592 | Down |
| T | chr9  | <i>NUP188</i>    | 0.618388098 | -0.693415543 | 0.004713623 | 0.029899235 | Down |
| T | chr12 | <i>LOC400027</i> | 0.239510355 | -2.061840062 | 0.003036554 | 0.022081878 | Down |
| T | chr17 | <i>PIGS</i>      | 0.453899842 | -1.13955411  | 0.002670264 | 0.020282226 | Down |
| T | chr19 | <i>SPPL2B</i>    | 0.423900659 | -1.238201884 | 0.00415388  | 0.027355637 | Down |
| T | chr11 | <i>ADRBK1</i>    | 0.566168398 | -0.82069687  | 0.000476021 | 0.006035157 | Down |
| T | chr17 | <i>CASKIN2</i>   | 0.249253321 | -2.004315366 | 1.51E-07    | 1.51E-05    | Down |
| T | chr8  | <i>FNTA</i>      | 1.905057355 | 0.929834433  | 0.002940576 | 0.021637201 | Up   |
| T | chr4  | <i>KDR</i>       | Inf         | Inf          | 0.009187574 | 0.047696415 | Up   |
| T | chr12 | <i>ABCB9</i>     | 0.262238007 | -1.931051299 | 0.00568466  | 0.034160327 | Down |
| T | chr8  | <i>LRRCC1</i>    | 1.898704741 | 0.925015576  | 0.002781639 | 0.020843917 | Up   |
| T | chr1  | <i>POU3F1</i>    | 0           | #NAME?       | 0.008595179 | 0.045582398 | Down |
| T | chr3  | <i>ZIC1</i>      | 0.029159921 | -5.09986936  | 0.002376741 | 0.018752262 | Down |
| T | chr22 | <i>SGSM1</i>     | 0.443724448 | -1.172264052 | 0.00543939  | 0.032959719 | Down |
| T | chr5  | <i>CHD1</i>      | 1.68457035  | 0.752380679  | 0.002391338 | 0.018804941 | Up   |
| T | chrX  | <i>FMR1</i>      | 2.22444314  | 1.153444222  | 2.70E-05    | 0.000733026 | Up   |
| T | chr7  | <i>KIAA1324L</i> | 8.322400002 | 3.056999631  | 0.000214202 | 0.003374978 | Up   |
| T | chr8  | <i>RPL8</i>      | 0.55088792  | -0.860169269 | 0.002916902 | 0.021487244 | Down |
| T | chr4  | <i>LEF1</i>      | 0.075956619 | -3.718680498 | 1.29E-07    | 1.36E-05    | Down |
| T | chr12 | <i>LRP1</i>      | 0.262990061 | -1.926919815 | 0.000336165 | 0.004700544 | Down |
| T | chr21 | <i>GCFC1</i>     | 2.297000113 | 1.199750928  | 4.52E-06    | 0.000208663 | Up   |
| T | chr1  | <i>CEP350</i>    | 1.776381393 | 0.828941365  | 0.000757583 | 0.008375789 | Up   |
| T | chr2  | <i>ACVR2A</i>    | 2.453203524 | 1.294666929  | 1.51E-05    | 0.000481504 | Up   |
| T | chr2  | <i>KCTD18</i>    | 2.64611793  | 1.40387736   | 0.003433835 | 0.024123751 | Up   |

|   |       |                 |             |              |             |             |      |
|---|-------|-----------------|-------------|--------------|-------------|-------------|------|
| T | chr19 | <i>SIPA1L3</i>  | 0.368023233 | -1.442131248 | 0.006942842 | 0.03914275  | Down |
| T | chr5  | <i>CSNK1A1</i>  | 1.55289534  | 0.634960601  | 0.007588582 | 0.041509702 | Up   |
| T | chr14 | <i>CCNB1IP1</i> | 0           | #NAME?       | 0.008647818 | 0.045749973 | Down |
| T | chr1  | <i>ODF2L</i>    | 4.669405231 | 2.223238797  | 0.000201958 | 0.003220954 | Up   |
| T | chr16 | <i>XYLT1</i>    | 0.429277462 | -1.220017665 | 0.003741364 | 0.025568271 | Down |
| T | chr8  | <i>VPS13B</i>   | 1.826938929 | 0.869428408  | 0.000288894 | 0.004201688 | Up   |
| T | chr2  | <i>KIF5C</i>    | 0.13297395  | -2.910784453 | 0.000284822 | 0.004165685 | Down |
| T | chr1  | <i>CHD1L</i>    | 2.089958749 | 1.063474467  | 0.003060654 | 0.022146029 | Up   |
| T | chr8  | <i>EIF4EBP1</i> | 0.344655667 | -1.536772359 | 0.004330509 | 0.02826204  | Down |
| T | chr19 | <i>MPND</i>     | 0.389324392 | -1.360955359 | 0.000147071 | 0.002593933 | Down |
| T | chr4  | <i>BOD1L1</i>   | 1.784925338 | 0.835863729  | 0.002518934 | 0.01949111  | Up   |
| T | chr19 | <i>FCHO1</i>    | 0.507684071 | -0.977997099 | 0.007475043 | 0.041092665 | Down |
| T | chr17 | <i>TMC6</i>     | 0.235953742 | -2.083424046 | 0.000337298 | 0.004711332 | Down |
| T | chr19 | <i>EEF2</i>     | 0.465129234 | -1.104296478 | 3.94E-07    | 3.21E-05    | Down |
| T | chr17 | <i>TMC8</i>     | 0.294264903 | -1.764812615 | 0.002155207 | 0.017573022 | Down |
| T | chr16 | <i>LOC81691</i> | 3.082939542 | 1.624306598  | 0.001496692 | 0.013741559 | Up   |
| T | chr20 | <i>RBL1</i>     | 2.054834279 | 1.039022047  | 8.95E-05    | 0.001802667 | Up   |
| T | chr6  | <i>PAK1IP1</i>  | 2.921813664 | 1.546864174  | 0.006817292 | 0.038704306 | Up   |
| T | chr5  | <i>C5orf43</i>  | 2.187125632 | 1.129036093  | 0.007001685 | 0.039327438 | Up   |
| T | chrX  | <i>LAMP2</i>    | 2.072222795 | 1.051179123  | 0.002279377 | 0.018209889 | Up   |
| T | chr9  | <i>GRHPR</i>    | 0.171610098 | -2.542793645 | 1.65E-05    | 0.000517537 | Down |
| T | chr10 | <i>FAM21C</i>   | Inf         | Inf          | 0.001802938 | 0.015606735 | Up   |
| T | chrX  | <i>OFD1</i>     | 2.993276022 | 1.581725321  | 0.008642687 | 0.045741376 | Up   |
| T | chr2  | <i>MZT2A</i>    | 0           | #NAME?       | 0.006833939 | 0.03876329  | Down |
| T | chr10 | <i>IFIT2</i>    | 7.176937084 | 2.843368273  | 0.000167298 | 0.002818606 | Up   |
| T | chr19 | <i>ELAVL3</i>   | 0.037763419 | -4.72686682  | 0.000171019 | 0.002860407 | Down |
| T | chr6  | <i>SYNCRIP</i>  | 1.715172445 | 0.778353634  | 0.000963921 | 0.010004226 | Up   |
| T | chr2  | <i>METTL5</i>   | 4.587532449 | 2.197718363  | 3.11E-06    | 0.000153613 | Up   |
| T | chr4  | <i>MMRN1</i>    | 3.998367889 | 1.99941122   | 1.67E-05    | 0.00052004  | Up   |
| T | chr11 | <i>EXT2</i>     | 0.505260925 | -0.984899483 | 0.0001722   | 0.002872789 | Down |
| T | chr14 | <i>GPR137C</i>  | 0.086642407 | -3.528782873 | 0.004995877 | 0.031036294 | Down |
| T | chr2  | <i>PRPF40A</i>  | 2.003089665 | 1.002227002  | 6.05E-05    | 0.00135951  | Up   |
| T | chr19 | <i>GSK3A</i>    | 0.593359941 | -0.753020563 | 0.003142771 | 0.022652258 | Down |
| T | chr7  | <i>ANKIB1</i>   | 1.615077795 | 0.691603658  | 0.006703227 | 0.038288224 | Up   |
| T | chr7  | <i>ICA1</i>     | 2.553536594 | 1.352496734  | 6.35E-05    | 0.001405045 | Up   |
| T | chr11 | <i>RPUSD4</i>   | 0.41083676  | -1.283362819 | 0.002673618 | 0.020282226 | Down |
| T | chr1  | <i>15-Sep</i>   | 2.096380185 | 1.067900378  | 0.001480436 | 0.013649308 | Up   |
| T | chr1  | <i>DTL</i>      | 1.701596797 | 0.766889223  | 0.004164737 | 0.027413298 | Up   |
| T | chr1  | <i>QSOX1</i>    | 0.356569352 | -1.48774539  | 0.000431475 | 0.005617786 | Down |
| T | chr5  | <i>TBC1D9B</i>  | 0.601812911 | -0.732613038 | 0.001839368 | 0.015745665 | Down |
| T | chr13 | <i>HS6ST3</i>   | 0.072899803 | -3.777941265 | 0.005776403 | 0.034533123 | Down |
| T | chr5  | <i>XRCC4</i>    | 7.036027799 | 2.814761183  | 1.30E-06    | 7.94E-05    | Up   |
| T | chr17 | <i>ACAP1</i>    | 0.632173759 | -0.661606943 | 0.005633192 | 0.033897891 | Down |
| T | chr14 | <i>RALGAPA1</i> | 1.858222125 | 0.893922966  | 0.002650968 | 0.020213047 | Up   |

|   |       |                |             |              |             |             |      |
|---|-------|----------------|-------------|--------------|-------------|-------------|------|
| T | chr22 | <i>LRP5L</i>   | 0.17858607  | -2.485308546 | 0.004730063 | 0.029955533 | Down |
| T | chr19 | <i>SCAF1</i>   | 0.288132542 | -1.795195485 | 2.35E-05    | 0.000668336 | Down |
| T | chr10 | <i>HPS1</i>    | 0.520741946 | -0.941359474 | 0.003905796 | 0.02630387  | Down |
| T | chr2  | <i>DNMT3A</i>  | 0.619207289 | -0.691505641 | 0.005557598 | 0.033520305 | Down |
| T | chr3  | <i>TOMM70A</i> | 1.989476354 | 0.992388752  | 0.002040862 | 0.016937075 | Up   |
| T | chr5  | <i>PURA</i>    | 1.557345737 | 0.639089264  | 0.008752329 | 0.046189156 | Up   |
| T | chr19 | <i>FZR1</i>    | 0.31183511  | -1.681144721 | 1.14E-08    | 1.74E-06    | Down |
| T | chr5  | <i>FST</i>     | 0.017701602 | -5.819976224 | 7.24E-05    | 0.001558692 | Down |
| T | chr14 | <i>GALC</i>    | 2.986921928 | 1.578659529  | 0.004470849 | 0.028841639 | Up   |
| T | chr6  | <i>PPARD</i>   | 0.248799222 | -2.00694612  | 0.000973956 | 0.010084306 | Down |
| T | chr5  | <i>PCDHGA4</i> | 0.277697919 | -1.848411729 | 0.00513432  | 0.031569414 | Down |
| T | chr13 | <i>GPR183</i>  | 0.297437066 | -1.749343649 | 0.005944831 | 0.03526888  | Down |
| T | chr8  | <i>ZNF703</i>  | 0.019759928 | -5.661278478 | 3.43E-11    | 1.21E-08    | Down |
| T | chr11 | <i>PTPN5</i>   | 0.056645128 | -4.141904319 | 0.006050189 | 0.035763825 | Down |
| T | chr8  | <i>ZNF707</i>  | 0.124957914 | -3.000485821 | 0.000866654 | 0.009259924 | Down |
| T | chr2  | <i>ITM2C</i>   | 0.522678138 | -0.936005278 | 0.001150084 | 0.011427262 | Down |
| T | chr17 | <i>CDC27</i>   | 1.711335578 | 0.775122688  | 0.00189853  | 0.016076821 | Up   |
| T | chr15 | <i>TMOD3</i>   | 1.79976554  | 0.847808976  | 0.004282351 | 0.027975741 | Up   |
| T | chr6  | <i>ZNF391</i>  | Inf         | Inf          | 0.00057589  | 0.006880093 | Up   |
| T | chr3  | <i>DZIP3</i>   | 2.465348224 | 1.301791438  | 4.25E-05    | 0.001050873 | Up   |
| T | chr13 | <i>N6AMT2</i>  | Inf         | Inf          | 0.009733153 | 0.049639842 | Up   |
| T | chr17 | <i>P2RX1</i>   | 4.968202626 | 2.312724014  | 1.48E-05    | 0.00047574  | Up   |
| T | chr10 | <i>FAM208B</i> | 2.801852478 | 1.486380998  | 4.79E-05    | 0.001139665 | Up   |
| T | chr1  | <i>DEPDC1</i>  | 2.415380858 | 1.272250692  | 0.002124868 | 0.017412706 | Up   |
| T | chr19 | <i>ZNF420</i>  | 2.445564216 | 1.290167348  | 0.00978698  | 0.049817506 | Up   |
| T | chr19 | <i>ATP1A3</i>  | 0.250543846 | -1.996864994 | 5.18E-06    | 0.000228336 | Down |
| T | chr8  | <i>CPQ</i>     | 1.858578269 | 0.894199444  | 0.001592932 | 0.014331991 | Up   |
| T | chr19 | <i>ZNF426</i>  | 3.085435185 | 1.625473989  | 0.000200374 | 0.003203524 | Up   |
| T | chr3  | <i>GPD1L</i>   | 0.362630201 | -1.463429014 | 0.007569007 | 0.041454773 | Down |
| T | chr19 | <i>CDC34</i>   | 0.348686154 | -1.519999016 | 2.10E-05    | 0.000619463 | Down |
| T | chr19 | <i>CDC37</i>   | 0.45986395  | -1.120720989 | 0.000647144 | 0.007524632 | Down |
| T | chr13 | <i>DNAJC3</i>  | 2.062999393 | 1.044743396  | 0.000870191 | 0.009282515 | Up   |
| T | chr19 | <i>LIN37</i>   | 0.465325619 | -1.103687475 | 0.009389798 | 0.048476181 | Down |
| T | chr18 | <i>CXXC1</i>   | 0.481437544 | -1.054579442 | 0.001052603 | 0.010686579 | Down |
| T | chr1  | <i>SUCO</i>    | 1.885294594 | 0.914789975  | 0.000312917 | 0.004461541 | Up   |
| T | chr1  | <i>ZNF496</i>  | 0.35198589  | -1.5064105   | 0.001448131 | 0.013484881 | Down |
| T | chr2  | <i>SRSF7</i>   | 1.661227688 | 0.732249823  | 0.003426589 | 0.02408582  | Up   |
| T | chr20 | <i>SOX12</i>   | 0.345484142 | -1.533308603 | 0.000462252 | 0.005900721 | Down |
| T | chr3  | <i>KPNA1</i>   | 1.63518702  | 0.709455649  | 0.006301324 | 0.036647452 | Up   |
| T | chr3  | <i>KPNA4</i>   | 1.715576626 | 0.778693565  | 0.001470987 | 0.013629614 | Up   |
| T | chr5  | <i>PCDHGB6</i> | 8.743051673 | 3.128136926  | 0.002018526 | 0.016794444 | Up   |
| T | chr16 | <i>COG7</i>    | 0.406655211 | -1.298121996 | 8.37E-05    | 0.001721688 | Down |
| T | chr12 | <i>BICD1</i>   | 2.291513677 | 1.196300896  | 0.000332418 | 0.004663151 | Up   |
| T | chr7  | <i>MKLN1</i>   | 1.887321123 | 0.916339915  | 0.00029977  | 0.004321319 | Up   |

|   |       |          |             |              |             |             |      |
|---|-------|----------|-------------|--------------|-------------|-------------|------|
| T | chr7  | HGF      | 1.708825841 | 0.773005369  | 0.00697916  | 0.039245741 | Up   |
| T | chr17 | YWHAE    | 0.630852122 | -0.664626233 | 0.007335711 | 0.0406722   | Down |
| T | chr1  | DNTTIP2  | 2.628656897 | 1.394325848  | 0.000325879 | 0.004616093 | Up   |
| T | chr4  | KIAA1109 | 1.703552374 | 0.768546302  | 0.001151269 | 0.011430328 | Up   |
| T | chr16 | CBFA2T3  | 0.139442785 | -2.842254806 | 8.64E-05    | 0.001764354 | Down |
| T | chr19 | ZNF431   | 3.134888841 | 1.648414288  | 0.006234809 | 0.036507774 | Up   |
| T | chr19 | ZNF433   | 2.189722352 | 1.130747953  | 0.003007962 | 0.021898367 | Up   |
| T | chr12 | SETD1B   | 0.234618672 | -2.091610258 | 0.00740497  | 0.040953367 | Down |
| T | chrX  | TMEM164  | 0.491182411 | -1.025669194 | 6.12E-05    | 0.001365873 | Down |
| T | chr5  | FAM172A  | 2.133637267 | 1.093314929  | 0.00018448  | 0.003027322 | Up   |
| T | chr16 | CTCF     | 1.596609044 | 0.675011089  | 0.005108758 | 0.031557222 | Up   |
| T | chr2  | ZC3H15   | 2.184351285 | 1.127204888  | 0.000523144 | 0.006402374 | Up   |
| T | chr19 | NFIX     | 0.499096916 | -1.002608106 | 0.002897676 | 0.021418174 | Down |
| T | chr1  | PLA2G4A  | 2.566856223 | 1.360002489  | 5.50E-06    | 0.000237624 | Up   |
| T | chr16 | PHKG2    | 0.56887802  | -0.813808754 | 0.005446269 | 0.032986082 | Down |
| T | chr10 | HHEX     | 0.242060355 | -2.046561282 | 7.51E-07    | 5.24E-05    | Down |
| T | chr5  | NUDT12   | 5.638307702 | 2.495262213  | 0.000596653 | 0.007081317 | Up   |
| T | chr19 | ARHGAP33 | 0.308662246 | -1.695899063 | 2.81E-05    | 0.000758564 | Down |
| T | chr19 | ARHGAP35 | 1.634967286 | 0.709261769  | 0.007647208 | 0.041742877 | Up   |
| T | chr15 | EDC3     | 0.31632979  | -1.660498667 | 8.23E-06    | 0.000316583 | Down |
| T | chr2  | SP3      | 1.672134171 | 0.741690613  | 0.001838985 | 0.015745665 | Up   |
| T | chr3  | IFRD2    | 0.487224576 | -1.037341188 | 0.003481846 | 0.024395364 | Down |
| T | chr19 | ZNF440   | 14.94963296 | 3.902038159  | 5.84E-06    | 0.00024659  | Up   |
| T | chr12 | NUP37    | 4.069617787 | 2.024893305  | 0.000155741 | 0.002680466 | Up   |
| T | chr19 | SMG9     | 0.52182354  | -0.938366067 | 0.008959316 | 0.046772002 | Down |
| T | chr2  | PPM1G    | 0.589928255 | -0.761388586 | 0.001479219 | 0.013647734 | Down |
| T | chr6  | SENP6    | 2.159729452 | 1.110850598  | 1.17E-05    | 0.000402145 | Up   |
| T | chr19 | RBM42    | 0.424495501 | -1.236178832 | 4.71E-05    | 0.001132166 | Down |
| T | chr5  | SLU7     | 2.160833543 | 1.11158794   | 0.002139349 | 0.017498398 | Up   |
| T | chr7  | HOXA11   | 0           | #NAME?       | 0.001867785 | 0.015895054 | Down |
| T | chr17 | GALK1    | 0.417570017 | -1.259909971 | 0.000100825 | 0.001977166 | Down |
| T | chr20 | TASP1    | 1.982558323 | 0.987363308  | 0.006756405 | 0.038507674 | Up   |
| T | chr1  | ADSS     | 1.757164372 | 0.813249153  | 0.006082764 | 0.035858895 | Up   |
| T | chr9  | INVS     | 2.390177894 | 1.257117998  | 0.006230315 | 0.036504955 | Up   |
| T | chr1  | ABCB10   | 0.193687208 | -2.368199418 | 1.70E-06    | 9.95E-05    | Down |
| T | chr17 | SPAG5    | 2.583510176 | 1.369332566  | 0.005690583 | 0.034180181 | Up   |
| T | chr11 | MAP3K11  | 0.496722986 | -1.009486586 | 0.008870798 | 0.046538548 | Down |
| T | chr1  | ERMAP    | 0.286751355 | -1.802127793 | 0.008906554 | 0.046627169 | Down |
| T | chr9  | CCL27    | 0.102348239 | -3.288441817 | 0.002987072 | 0.021831564 | Down |
| T | chr3  | COL7A1   | 0.025747785 | -5.279407843 | 0.001188713 | 0.011695288 | Down |
| T | chr6  | TAP2     | 0.498246523 | -1.005068358 | 0.000997967 | 0.010244601 | Down |
| T | chr16 | DHODH    | 0.376479998 | -1.409354876 | 0.000376554 | 0.005095978 | Down |
| T | chr17 | SPAG9    | 1.610032611 | 0.68708991   | 0.005128952 | 0.031569414 | Up   |
| T | chr15 | UBE3A    | 2.208249806 | 1.142903385  | 6.12E-05    | 0.001365873 | Up   |

|   |       |                     |             |              |             |             |      |
|---|-------|---------------------|-------------|--------------|-------------|-------------|------|
| T | chr8  | <i>CYC1</i>         | 0.590257592 | -0.760583403 | 0.008287851 | 0.044312827 | Down |
| T | chr12 | <i>LOC100335030</i> | 2.126217076 | 1.088288896  | 0.006177211 | 0.036284507 | Up   |
| T | chr6  | <i>PGM3</i>         | 2.438747498 | 1.286140393  | 0.007350872 | 0.040738943 | Up   |
| T | chr1  | <i>ADC</i>          | 0.25992722  | -1.943820372 | 0.006669337 | 0.038144746 | Down |
| T | chr17 | <i>SPNS2</i>        | 0.543611175 | -0.879352982 | 0.000449873 | 0.005799453 | Down |
| T | chr17 | <i>SPNS3</i>        | 0.339062927 | -1.560375044 | 0.000577351 | 0.006884939 | Down |
| T | chr8  | <i>WWP1</i>         | 2.239613024 | 1.163249475  | 7.26E-05    | 0.001558692 | Up   |
| T | chr19 | <i>STRN4</i>        | 0.537389819 | -0.895959104 | 0.001186204 | 0.011679405 | Down |
| T | chr11 | <i>SIPA1</i>        | 0.431079873 | -1.21397289  | 2.09E-05    | 0.000618141 | Down |
| T | chr5  | <i>FAM174A</i>      | 7.496169095 | 2.906153497  | 3.76E-05    | 0.000948065 | Up   |
| T | chr6  | <i>PRPF4B</i>       | 1.719201149 | 0.781738352  | 0.001220634 | 0.011875007 | Up   |
| T | chr3  | <i>IQSEC1</i>       | 0.462476285 | -1.112548707 | 0.000120153 | 0.002232926 | Down |
| T | chr1  | <i>PYGO2</i>        | 0.333909681 | -1.582470173 | 0.000910758 | 0.009595799 | Down |
| T | chr5  | <i>FNIP1</i>        | 2.005018047 | 1.003615222  | 9.90E-05    | 0.001950258 | Up   |
| T | chr19 | <i>TIMM13</i>       | 0.452699854 | -1.143373254 | 0.000927395 | 0.009686787 | Down |
| T | chr4  | <i>IDUA</i>         | 0.347120296 | -1.526492373 | 0.003169316 | 0.022730093 | Down |
| T | chr12 | <i>RBM19</i>        | 0.483741138 | -1.047692863 | 0.008413193 | 0.044756321 | Down |
| T | chr15 | <i>LOC100507217</i> | 2.485260767 | 1.313397235  | 0.001609878 | 0.014424772 | Up   |
| T | chr11 | <i>PITPNM1</i>      | 0.4433019   | -1.17363855  | 0.000322856 | 0.004583224 | Down |
| T | chr16 | <i>RANBP10</i>      | 0.442151844 | -1.177386188 | 8.83E-05    | 0.00178632  | Down |
| T | chr18 | <i>MIB1</i>         | 1.613519977 | 0.69021144   | 0.004865697 | 0.030488897 | Up   |
| T | chr8  | <i>SGK223</i>       | 0.143706213 | -2.798805656 | 0.004960839 | 0.030882793 | Down |
| T | chr7  | <i>MET</i>          | 3.157349902 | 1.658714151  | 0.000286889 | 0.004186528 | Up   |
| T | chr7  | <i>KCNH2</i>        | 0.393480281 | -1.345636758 | 0.006765905 | 0.038528153 | Down |
| T | chr19 | <i>NAPA</i>         | 0.572271554 | -0.805228199 | 0.00726526  | 0.040432404 | Down |
| T | chr16 | <i>SPNS1</i>        | 0.419346312 | -1.253785928 | 0.000946427 | 0.009861893 | Down |
| T | chr7  | <i>SNORA22</i>      | 0.159123531 | -2.651780896 | 0.002264382 | 0.018179152 | Down |
| T | chr3  | <i>TRNT1</i>        | 3.461856552 | 1.791545946  | 0.001107601 | 0.011098132 | Up   |
| T | chr19 | <i>ZFP14</i>        | 3.551731238 | 1.828522416  | 0.003329529 | 0.023632774 | Up   |
| T | chr1  | <i>KCNAB2</i>       | 0.489254818 | -1.031342036 | 0.000419882 | 0.005527525 | Down |
| T | chrX  | <i>PDZD4</i>        | 0.357110559 | -1.485557303 | 0.001849703 | 0.015813383 | Down |
| T | chr11 | <i>ZBTB3</i>        | 0.372636647 | -1.424158533 | 0.002433422 | 0.019044044 | Down |
| T | chr11 | <i>PCF11</i>        | 1.540052281 | 0.622979328  | 0.009819235 | 0.049883853 | Up   |
| T | chr4  | <i>PCNAP1</i>       | 2.109306725 | 1.0767689    | 0.004063673 | 0.02689735  | Up   |
| T | chr12 | <i>UBE3B</i>        | 0.371343829 | -1.42917249  | 5.20E-05    | 0.001222245 | Down |
| T | chr2  | <i>ARHGAP15</i>     | 2.042555643 | 1.03037538   | 4.00E-05    | 0.001001067 | Up   |
| T | chr17 | <i>TMEM104</i>      | 0.271492439 | -1.881016076 | 0.000332268 | 0.004663151 | Down |
| T | chr2  | <i>ETAA1</i>        | 3.042944861 | 1.605468192  | 0.000510683 | 0.006327041 | Up   |
| T | chr11 | <i>RBM14</i>        | 0.294447922 | -1.763915603 | 5.48E-08    | 6.75E-06    | Down |
| T | chr1  | <i>LPGAT1</i>       | 3.134808466 | 1.648377298  | 5.93E-06    | 0.00024894  | Up   |
| T | chr11 | <i>GTF2H1</i>       | 1.901830991 | 0.927389045  | 0.002347764 | 0.018568202 | Up   |
| T | chr19 | <i>TRAPPC5</i>      | 0.410095024 | -1.285969857 | 0.006042133 | 0.035732397 | Down |
| T | chr14 | <i>SCFD1</i>        | 2.535889124 | 1.342491668  | 0.000436389 | 0.005669824 | Up   |
| T | chr16 | <i>GSE1</i>         | 0.503130269 | -0.990996107 | 0.007970755 | 0.043094267 | Down |

|   |       |                 |             |              |             |             |      |
|---|-------|-----------------|-------------|--------------|-------------|-------------|------|
| T | chr4  | <i>NPNT</i>     | 0.048599869 | -4.362903766 | 0.000991619 | 0.010209015 | Down |
| T | chr14 | <i>SMEK1</i>    | 1.664924899 | 0.735457102  | 0.002099826 | 0.017283491 | Up   |
| T | chrX  | <i>BHLHB9</i>   | 4.421729636 | 2.144610815  | 3.97E-08    | 5.18E-06    | Up   |
| T | chr22 | <i>DGCR2</i>    | 0.558495716 | -0.840381881 | 0.004012672 | 0.02668161  | Down |
| T | chr12 | <i>TMTC3</i>    | 3.221469173 | 1.687718789  | 7.55E-05    | 0.001604102 | Up   |
| T | chrX  | <i>CLCN5</i>    | 2.241351727 | 1.164369063  | 0.001390155 | 0.013085112 | Up   |
| T | chr16 | <i>RPS2</i>     | 0.154403104 | -2.695226339 | 0.004597007 | 0.029408674 | Down |
| T | chr6  | <i>PHACTR2</i>  | 1.898496401 | 0.924857264  | 0.003564073 | 0.024734629 | Up   |
| T | chr1  | <i>RALGPS2</i>  | 2.049283114 | 1.035119311  | 0.001348633 | 0.012833167 | Up   |
| T | chrX  | <i>SRPK3</i>    | 2.971324002 | 1.571105929  | 0.000845373 | 0.009077148 | Up   |
| T | chr18 | <i>ADNP2</i>    | 0.503518645 | -0.989882894 | 0.00356122  | 0.024734629 | Down |
| T | chr5  | <i>GPBP1</i>    | 1.794375344 | 0.843481702  | 0.000522856 | 0.006402374 | Up   |
| T | chr17 | <i>SP2</i>      | 0.252650025 | -1.984787772 | 6.28E-06    | 0.000258317 | Down |
| T | chr14 | <i>SPTB</i>     | 0.365846196 | -1.450690836 | 0.000522345 | 0.006402374 | Down |
| T | chr17 | <i>DVL2</i>     | 0.412880402 | -1.276204153 | 7.16E-05    | 0.001551772 | Down |
| T | chr7  | <i>ZNF117</i>   | 3.113466673 | 1.638521836  | 0.00016744  | 0.002818606 | Up   |
| T | chr10 | <i>PLXDC2</i>   | 5.561536936 | 2.475483628  | 1.48E-06    | 8.80E-05    | Up   |
| T | chr17 | <i>NUFIP2</i>   | 1.697765735 | 0.763637404  | 0.00139213  | 0.013094257 | Up   |
| T | chr11 | <i>ATG2A</i>    | 0.327275119 | -1.611424167 | 0.000151407 | 0.002637183 | Down |
| T | chr19 | <i>ZFP28</i>    | 3.960294437 | 1.985607695  | 0.001541842 | 0.014036892 | Up   |
| T | chr12 | <i>CMKLR1</i>   | 0           | #NAME?       | 4.08E-08    | 5.27E-06    | Down |
| T | chr5  | <i>ARAP3</i>    | 0.276655424 | -1.853837889 | 1.28E-05    | 0.000430075 | Down |
| T | chr19 | <i>C19orf47</i> | 0.337186253 | -1.568382378 | 0.001817185 | 0.015672786 | Down |
| T | chr1  | <i>PIN1P1</i>   | 0.058319843 | -4.09986936  | 0.001782111 | 0.015478976 | Down |
| T | chr19 | <i>MAST3</i>    | 0.27702554  | -1.851909103 | 0.000363698 | 0.004973594 | Down |
| T | chr17 | <i>DYNLL2</i>   | 0.255945575 | -1.966091029 | 7.26E-11    | 2.43E-08    | Down |
| T | chr1  | <i>ITPKB</i>    | 0.440146657 | -1.183943784 | 0.001200832 | 0.011766867 | Down |
| T | chr7  | <i>SKAP2</i>    | 2.050307137 | 1.035840042  | 9.89E-05    | 0.001950258 | Up   |
| T | chr19 | <i>ZNF470</i>   | 2.55549542  | 1.353603006  | 0.002345695 | 0.018568202 | Up   |
| T | chr8  | <i>MTMR9</i>    | 0.149592524 | -2.740890015 | 0.003716348 | 0.025450642 | Down |
| T | chr2  | <i>SSB</i>      | 3.284665896 | 1.715746632  | 0.000625074 | 0.007326292 | Up   |
| T | chr2  | <i>MOGS</i>     | 0.474104763 | -1.076722209 | 0.000428047 | 0.005595493 | Down |
| T | chr3  | <i>SNRK</i>     | 2.073016745 | 1.05173177   | 0.004739203 | 0.029980833 | Up   |
| T | chr8  | <i>EMC2</i>     | 2.47571225  | 1.307843641  | 0.003050625 | 0.022130939 | Up   |
| T | chr20 | <i>TRMT6</i>    | 2.058695258 | 1.041730288  | 0.003002394 | 0.021894484 | Up   |
| T | chr3  | <i>USP19</i>    | 0.515253647 | -0.956645284 | 0.002540644 | 0.019612566 | Down |
| T | chr13 | <i>NBEA</i>     | 3.099831546 | 1.632189817  | 5.33E-06    | 0.000231947 | Up   |
| T | chr10 | <i>MTPAP</i>    | 2.14159327  | 1.09868451   | 0.008992393 | 0.046888394 | Up   |
| T | chr22 | <i>SMTN</i>     | 0.326226658 | -1.616053415 | 0.005226709 | 0.031997954 | Down |
| T | chr17 | <i>SLC4A1</i>   | 0.069231041 | -3.852437142 | 1.70E-10    | 4.83E-08    | Down |
| T | chr1  | <i>CACHD1</i>   | 0.061887433 | -4.0142097   | 0.000911329 | 0.009595799 | Down |
| T | chr8  | <i>SDCBP</i>    | 1.972415139 | 0.979963231  | 0.002783633 | 0.020846884 | Up   |
| T | chr20 | <i>NFATC2</i>   | 0.215542263 | -2.213957315 | 1.41E-07    | 1.45E-05    | Down |
| T | chr16 | <i>ACD</i>      | 0.132272074 | -2.918419596 | 8.70E-07    | 5.81E-05    | Down |

|   |       |                 |             |              |             |             |      |
|---|-------|-----------------|-------------|--------------|-------------|-------------|------|
| T | chr14 | <i>STRN3</i>    | 1.917858855 | 0.939496549  | 0.000190896 | 0.003086894 | Up   |
| T | chr17 | <i>ANKRD13B</i> | 0.355565698 | -1.491811944 | 0.000212753 | 0.00335619  | Down |
| T | chr8  | <i>EFR3A</i>    | 2.247378224 | 1.168242945  | 1.16E-05    | 0.000402145 | Up   |
| T | chr1  | <i>MFN2</i>     | 0.583931918 | -0.776127922 | 0.006461531 | 0.037332657 | Down |
| T | chr19 | <i>ZFP36</i>    | 0.259242331 | -1.947626784 | 1.25E-05    | 0.000425295 | Down |
| T | chr4  | <i>TMA16</i>    | 3.600610226 | 1.848241433  | 0.004051318 | 0.026870103 | Up   |
| T | chr7  | <i>FGL2</i>     | 2.248287997 | 1.168826851  | 0.003103647 | 0.022419813 | Up   |
| T | chr14 | <i>REC8</i>     | 0.237416962 | -2.074505087 | 0.0026534   | 0.020219775 | Down |
| T | chr6  | <i>SERPINB1</i> | 2.035116059 | 1.025111071  | 0.003113683 | 0.022479864 | Up   |
| T | chr10 | <i>SGMS1</i>    | 2.219409309 | 1.150175757  | 1.11E-05    | 0.000385963 | Up   |
| T | chrX  | <i>MOSPD1</i>   | 3.012895304 | 1.591150541  | 0.0004175   | 0.005507282 | Up   |
| T | chrX  | <i>MOSPD2</i>   | 5.200363231 | 2.378612395  | 9.50E-07    | 6.20E-05    | Up   |
| T | chr11 | <i>PGM2L1</i>   | 1.718902802 | 0.781487967  | 0.005250955 | 0.032101202 | Up   |
| T | chr11 | <i>ACAT1</i>    | 1.715338132 | 0.778492993  | 0.005951638 | 0.035293214 | Up   |
| T | chr1  | <i>RRP15</i>    | 3.372812405 | 1.753952078  | 0.009607991 | 0.04917822  | Up   |
| T | chr4  | <i>DHX15</i>    | 1.690368405 | 0.757337707  | 0.001299785 | 0.01249594  | Up   |
| T | chr3  | <i>TRAK1</i>    | 0.416855063 | -1.262382238 | 0.000147134 | 0.002593933 | Down |
| T | chr5  | <i>DMXL1</i>    | 1.875032832 | 0.906915857  | 0.00018207  | 0.003006086 | Up   |
| T | chr6  | <i>TUBB</i>     | 0.629752307 | -0.667143592 | 0.002662003 | 0.020238048 | Down |
| T | chr5  | <i>RICTOR</i>   | 1.897041528 | 0.923751261  | 0.000358723 | 0.004931404 | Up   |
| T | chr1  | <i>PDIK1L</i>   | 1.914692913 | 0.937113025  | 0.001826299 | 0.015716292 | Up   |
| T | chr1  | <i>GABPB2</i>   | 2.059195768 | 1.042080994  | 0.009678277 | 0.049456639 | Up   |
| T | chr5  | <i>BOD1</i>     | 4.25705334  | 2.089855167  | 0.007667992 | 0.041830568 | Up   |
| T | chr14 | <i>FUT8</i>     | 2.942739434 | 1.557159804  | 3.41E-10    | 9.08E-08    | Up   |
| T | chr7  | <i>SNORA5C</i>  | 0.330066311 | -1.599172201 | 0.002085975 | 0.017223815 | Down |
| T | chr16 | <i>KATNB1</i>   | 0.520163811 | -0.942962063 | 0.00406698  | 0.02690559  | Down |
| T | chr7  | <i>HOXA3</i>    | 0.357482718 | -1.484054597 | 0.00282772  | 0.021068212 | Down |
| T | chr16 | <i>EMC8</i>     | 0.368034981 | -1.442085196 | 0.008945012 | 0.046753457 | Down |
| T | chr3  | <i>TFDP2</i>    | 1.965168969 | 0.974653363  | 0.000655219 | 0.007574948 | Up   |
| T | chr1  | <i>NCSTN</i>    | 0.598164922 | -0.741384785 | 0.004786301 | 0.030136138 | Down |
| T | chr7  | <i>HOXA9</i>    | 0.26765417  | -1.901557964 | 0.001803998 | 0.015606735 | Down |
| T | chr19 | <i>ZNF493</i>   | 3.169072907 | 1.664060851  | 0.006223078 | 0.036488212 | Up   |
| T | chr17 | <i>SMURF2</i>   | 1.860269284 | 0.895511474  | 0.001140395 | 0.011383007 | Up   |
| T | chr11 | <i>RBM4B</i>    | 0.576644005 | -0.794247158 | 0.00207127  | 0.01713493  | Down |
| T | chr19 | <i>TIMM50</i>   | 0.490485332 | -1.027718103 | 0.002789316 | 0.020877459 | Down |
| T | chr2  | <i>FTH1P3</i>   | 0.165912754 | -2.591503302 | 0.008919504 | 0.046657519 | Down |
| T | chr1  | <i>RNF220</i>   | 0.376789173 | -1.408170586 | 7.77E-05    | 0.001633009 | Down |
| T | chr15 | <i>ATPBD4</i>   | 2.697292972 | 1.431512231  | 0.000286583 | 0.004186528 | Up   |
| T | chr8  | <i>SCRIB</i>    | 0.53430731  | -0.904258338 | 0.00454616  | 0.029222031 | Down |
| T | chr8  | <i>GFRA2</i>    | 0.115523209 | -3.113745373 | 0.003440266 | 0.024141197 | Down |
| T | chr18 | <i>C18orf54</i> | 28.3910284  | 4.827363203  | 2.12E-06    | 0.000116017 | Up   |
| T | chr1  | <i>USP21</i>    | 0.418122768 | -1.258001492 | 1.43E-05    | 0.000462721 | Down |
| T | chr5  | <i>TMEM161B</i> | 2.274122551 | 1.185310002  | 0.001168351 | 0.011547205 | Up   |
| T | chr17 | <i>THRA</i>     | 0.612070053 | -0.708231313 | 0.004960328 | 0.030882793 | Down |

|   |       |                 |             |              |             |             |      |
|---|-------|-----------------|-------------|--------------|-------------|-------------|------|
| T | chr11 | <i>PIK3C2A</i>  | 1.983908054 | 0.988345164  | 0.000550349 | 0.006654172 | Up   |
| T | chr12 | <i>NFYB</i>     | 2.521721714 | 1.334409075  | 0.000204235 | 0.003245378 | Up   |
| T | chr10 | <i>ZRANB1</i>   | 2.395696264 | 1.260445009  | 2.29E-06    | 0.0001209   | Up   |
| T | chr6  | <i>TMEM170B</i> | 2.794597205 | 1.482640358  | 0.000777001 | 0.008532627 | Up   |
| T | chr17 | <i>CORO6</i>    | 0.437184702 | -1.193685177 | 0.008156626 | 0.043790678 | Down |
| T | chr2  | <i>USP34</i>    | 1.584181499 | 0.663737633  | 0.004670558 | 0.029708483 | Up   |
| T | chr12 | <i>FBXL14</i>   | 0.212571235 | -2.233981708 | 2.00E-07    | 1.84E-05    | Down |
| T | chr19 | <i>NOSIP</i>    | 0.457450678 | -1.128311894 | 0.002518526 | 0.01949111  | Down |
| T | chr2  | <i>USP37</i>    | 1.976525965 | 0.982966907  | 0.000190755 | 0.003086894 | Up   |
| T | chr22 | <i>RNU12</i>    | 0.235077686 | -2.088790491 | 3.78E-16    | 5.48E-13    | Down |
| T | chr14 | <i>BCL11B</i>   | 0.128984425 | -2.954731224 | 1.56E-05    | 0.000493218 | Down |
| T | chr3  | <i>ATR</i>      | 2.230512227 | 1.157375056  | 1.49E-05    | 0.000476085 | Up   |
| T | chr4  | <i>NCAPG</i>    | 2.228650096 | 1.156170128  | 0.000583387 | 0.00695056  | Up   |
| T | chr3  | <i>GNAI2</i>    | 0.391338629 | -1.35351057  | 1.68E-09    | 3.65E-07    | Down |
| T | chr8  | <i>PEX2</i>     | 2.258170096 | 1.175154161  | 0.004117526 | 0.027184837 | Up   |
| T | chr7  | <i>GRB10</i>    | 7.243263029 | 2.856639766  | 8.08E-10    | 1.95E-07    | Up   |
| T | chr2  | <i>WTH3DI</i>   | 3.008064395 | 1.588835452  | 0.003375055 | 0.02383918  | Up   |
| T | chr20 | <i>SNORA51</i>  | 0.2230778   | -2.164381149 | 0.001569431 | 0.014198888 | Down |
| T | chr5  | <i>TMEM173</i>  | 0.441405558 | -1.179823299 | 0.002276842 | 0.018207089 | Down |
| T | chr14 | <i>MPP5</i>     | 2.054395429 | 1.038713897  | 0.001504519 | 0.013774004 | Up   |
| T | chr19 | <i>PIH1D1</i>   | 0.418930459 | -1.255217314 | 0.000614751 | 0.007263894 | Down |
| T | chr19 | <i>C19orf6</i>  | 0.420017474 | -1.251478745 | 5.20E-06    | 0.000228555 | Down |
| T | chr15 | <i>CHST14</i>   | 0.155158383 | -2.688186454 | 1.01E-06    | 6.44E-05    | Down |
| T | chr10 | <i>ABLIM1</i>   | 0.56921668  | -0.812950158 | 0.006432499 | 0.037197863 | Down |
| T | chr6  | <i>ME1</i>      | 0.119406279 | -3.066049396 | 0.000224914 | 0.003505649 | Down |
| T | chr16 | <i>MC1R</i>     | 0.022430709 | -5.478380983 | 0.000722326 | 0.008131986 | Down |
| T | chr1  | <i>EBNA1BP2</i> | 2.952306368 | 1.561842441  | 0.006259565 | 0.036570663 | Up   |
| T | chr12 | <i>LRRK2</i>    | 2.317893776 | 1.212814452  | 0.000493281 | 0.006170036 | Up   |
| T | chr19 | <i>SLC44A2</i>  | 0.528028179 | -0.921313172 | 0.000329846 | 0.004653212 | Down |
| T | chr1  | <i>TAGLN2</i>   | 0.555720067 | -0.847569757 | 0.000710161 | 0.008035353 | Down |
| T | chr3  | <i>DHX36</i>    | 2.371577958 | 1.245847293  | 9.06E-06    | 0.000335907 | Up   |
| T | chr8  | <i>POP1</i>     | 2.257014478 | 1.174415673  | 0.006219958 | 0.036486321 | Up   |
| T | chr7  | <i>GBAS</i>     | 2.538560304 | 1.344010532  | 0.000344599 | 0.004772439 | Up   |
| T | chr4  | <i>CDS1</i>     | 0.350816656 | -1.51121085  | 0.00404157  | 0.026819083 | Down |
| T | chr11 | <i>LIN7C</i>    | 1.757486049 | 0.813513237  | 0.007060202 | 0.039548045 | Up   |
| T | chr10 | <i>PPA1</i>     | 3.724940121 | 1.897217234  | 0.00490539  | 0.030663979 | Up   |
| T | chr19 | <i>RAVER1</i>   | 0.306727042 | -1.704972729 | 1.14E-06    | 7.10E-05    | Down |
| T | chr17 | <i>PFAS</i>     | 0.598122122 | -0.741488017 | 0.005117619 | 0.031569414 | Down |
| T | chr19 | <i>TCF3</i>     | 0.467028626 | -1.098417112 | 0.000517741 | 0.006363919 | Down |
| T | chr8  | <i>MYBL1</i>    | 2.220043881 | 1.150588193  | 0.006099631 | 0.035909651 | Up   |
| T | chr1  | <i>NVL</i>      | 1.670457297 | 0.740243103  | 0.006303609 | 0.036647452 | Up   |
| T | chr2  | <i>CYBRD1</i>   | 0           | #NAME?       | 0.000257867 | 0.003871272 | Down |
| T | chr16 | <i>SNN</i>      | 0.431537318 | -1.212442769 | 0.003904478 | 0.02630387  | Down |
| T | chr19 | <i>FTL</i>      | 0.540684608 | -0.887140807 | 0.00168764  | 0.014916631 | Down |

|   |       |                  |             |              |             |             |      |
|---|-------|------------------|-------------|--------------|-------------|-------------|------|
| T | chr11 | <i>FNBP4</i>     | 1.840776101 | 0.880314158  | 0.000653988 | 0.007570473 | Up   |
| T | chr5  | <i>SLC35A4</i>   | 0.439079383 | -1.187446301 | 0.000985314 | 0.010171693 | Down |
| T | chr7  | <i>SLC25A40</i>  | 2.778041002 | 1.474067893  | 0.005121745 | 0.031569414 | Up   |
| T | chr7  | <i>PTPN12</i>    | 1.691492861 | 0.758297088  | 0.004645798 | 0.029579836 | Up   |
| T | chr20 | <i>PLCB4</i>     | 1.92968998  | 0.948369086  | 0.001000229 | 0.010250583 | Up   |
| T | chr11 | <i>CHEK1</i>     | 2.613244725 | 1.385842236  | 2.55E-05    | 0.000707107 | Up   |
| T | chr15 | <i>MYO5A</i>     | 2.065156698 | 1.046251253  | 2.44E-05    | 0.000690042 | Up   |
| T | chr15 | <i>C15orf39</i>  | 0.280095086 | -1.83601142  | 2.31E-06    | 0.000121335 | Down |
| T | chr15 | <i>BTBD1</i>     | 1.764364661 | 0.81914877   | 0.004551778 | 0.029222031 | Up   |
| T | chr1  | <i>SRM</i>       | 0.459759518 | -1.121048655 | 0.000148378 | 0.002608809 | Down |
| T | chr9  | <i>SETX</i>      | 2.159850852 | 1.110931691  | 1.65E-05    | 0.000516202 | Up   |
| T | chr3  | <i>GOLGB1</i>    | 1.955321985 | 0.967406197  | 0.001979477 | 0.016575257 | Up   |
| T | chr16 | <i>C16orf54</i>  | 0.031469515 | -4.989901226 | 0.002714383 | 0.020492965 | Down |
| T | chr1  | <i>SCARNA3</i>   | 0.199266896 | -2.327226039 | 2.27E-06    | 0.000120724 | Down |
| T | chr1  | <i>SCARNA4</i>   | 0.057315014 | -4.124943085 | 1.39E-05    | 0.000455033 | Down |
| T | chr16 | <i>C16orf58</i>  | 0.322027947 | -1.634742198 | 0.0002716   | 0.003994696 | Down |
| T | chr1  | <i>RABGGTB</i>   | 3.572287662 | 1.836848259  | 0.007148538 | 0.039922872 | Up   |
| T | chr10 | <i>OBFC1</i>     | 0.274157917 | -1.866920961 | 0.00784158  | 0.04252428  | Down |
| T | chrX  | <i>NRK</i>       | Inf         | Inf          | 0.000197661 | 0.00317963  | Up   |
| T | chr17 | <i>CACNB1</i>    | 0.327142206 | -1.612010197 | 0.000816241 | 0.008851769 | Down |
| T | chr19 | <i>WDR18</i>     | 0.331869875 | -1.591310418 | 0.002993065 | 0.021850879 | Down |
| T | chr1  | <i>NSL1</i>      | 0.114964971 | -3.120733751 | 0.00921752  | 0.047775829 | Down |
| T | chr7  | <i>CUL1</i>      | 2.247493913 | 1.168317209  | 3.24E-06    | 0.000159432 | Up   |
| T | chr1  | <i>ELOVL1</i>    | 0.540835468 | -0.886738328 | 0.001483669 | 0.013669456 | Down |
| T | chr5  | <i>HEXB</i>      | 1.862621016 | 0.897334162  | 0.007376392 | 0.040828347 | Up   |
| T | chr11 | <i>CYP2R1</i>    | 2.599999402 | 1.378511291  | 0.003394013 | 0.023921282 | Up   |
| T | chr6  | <i>AGPAT1</i>    | 0.205306169 | -2.284151119 | 1.22E-11    | 4.67E-09    | Down |
| T | chr8  | <i>DCAF13</i>    | 2.525899175 | 1.336797053  | 0.006066169 | 0.035796644 | Up   |
| T | chr9  | <i>IFT74</i>     | 2.15233872  | 1.105905137  | 0.003365927 | 0.02380048  | Up   |
| T | chr10 | <i>OPTN</i>      | 14.68734126 | 3.876501354  | 0.00224202  | 0.01806633  | Up   |
| T | chr14 | <i>EGLN3</i>     | 0.426893125 | -1.228053166 | 0.001336791 | 0.012767933 | Down |
| T | chr1  | <i>SCAMP3</i>    | 0.143033337 | -2.805576661 | 2.63E-13    | 2.15E-10    | Down |
| T | chr2  | <i>C2orf44</i>   | 0.177513307 | -2.49400092  | 0.000526456 | 0.00643085  | Down |
| T | chr1  | <i>CEPT1</i>     | 1.847189029 | 0.88533151   | 0.003906728 | 0.02630387  | Up   |
| T | chr8  | <i>DECR1</i>     | 2.925426893 | 1.548647165  | 0.001555855 | 0.014115892 | Up   |
| T | chr14 | <i>SNORD8</i>    | 0.302992118 | -1.722647831 | 0.000214824 | 0.003376627 | Down |
| T | chr3  | <i>SNX4</i>      | 1.919102346 | 0.940431653  | 0.000641774 | 0.007482206 | Up   |
| T | chrX  | <i>GUCY2F</i>    | 0           | #NAME?       | 0.00065958  | 0.0076082   | Down |
| T | chr6  | <i>HIST1H2AG</i> | 0.185977056 | -2.426803446 | 9.67E-05    | 0.001920161 | Down |
| T | chr6  | <i>KLHDC3</i>    | 0.479361142 | -1.060815128 | 0.00595775  | 0.035313409 | Down |
| T | chr6  | <i>HIST1H2AH</i> | 0.568700834 | -0.814258174 | 0.001661531 | 0.014765891 | Down |
| T | chr6  | <i>HIST1H2AI</i> | 0.26225411  | -1.930962712 | 5.68E-08    | 6.93E-06    | Down |
| T | chr6  | <i>CASP8AP2</i>  | 2.082511594 | 1.058324527  | 0.00021773  | 0.003405887 | Up   |
| T | chr6  | <i>HIST1H2AL</i> | 0.454297061 | -1.138292123 | 0.004207456 | 0.027567436 | Down |

|   |       |                  |             |              |             |             |      |
|---|-------|------------------|-------------|--------------|-------------|-------------|------|
| T | chr1  | <i>CD84</i>      | 2.497933233 | 1.320734916  | 0.006520323 | 0.03756505  | Up   |
| T | chr17 | <i>MIR142</i>    | 0.157636487 | -2.665326587 | 2.48E-11    | 8.98E-09    | Down |
| T | chr10 | <i>FAM178A</i>   | 1.890132061 | 0.918487037  | 0.000317238 | 0.004518224 | Up   |
| T | chr1  | <i>EDEM3</i>     | 1.795508193 | 0.844392236  | 0.001758809 | 0.015331757 | Up   |
| T | chr8  | <i>ANGPT1</i>    | 2.706351755 | 1.436349364  | 3.30E-08    | 4.34E-06    | Up   |
| T | chr19 | <i>ATP13A1</i>   | 0.514133166 | -0.959786013 | 0.000115964 | 0.002179931 | Down |
| T | chr16 | <i>SPN</i>       | 0.36785466  | -1.442792228 | 0.007138491 | 0.039918082 | Down |
| T | chr9  | <i>ZFAND5</i>    | 1.819229652 | 0.863327674  | 0.000406123 | 0.005395392 | Up   |
| T | chr6  | <i>CMAHP</i>     | 0.476639965 | -1.069028173 | 0.004623616 | 0.029496186 | Down |
| T | chr3  | <i>FXR1</i>      | 1.684439513 | 0.752268623  | 0.002166003 | 0.017595063 | Up   |
| T | chr11 | <i>FAM111A</i>   | 5.196703862 | 2.377596848  | 4.89E-06    | 0.000220704 | Up   |
| T | chr3  | <i>RNF123</i>    | 0.420759694 | -1.248931586 | 3.65E-06    | 0.000175059 | Down |
| T | chr3  | <i>TTC21A</i>    | 0.128204055 | -2.963486203 | 0.000890479 | 0.009452556 | Down |
| T | chr8  | <i>TAF2</i>      | 1.746251173 | 0.804261085  | 0.00344372  | 0.024141197 | Up   |
| T | chr11 | <i>SNORA3</i>    | 0.255304185 | -1.969710909 | 6.46E-12    | 2.91E-09    | Down |
| T | chr7  | <i>ZYX</i>       | 0.35782452  | -1.482675842 | 0.004759139 | 0.03004203  | Down |
| T | chr6  | <i>HIST1H2BE</i> | 0.441205054 | -1.180478779 | 0.002543516 | 0.019623126 | Down |
| T | chr6  | <i>HIST1H2BF</i> | 0.343849898 | -1.540149177 | 0.000635457 | 0.007428472 | Down |
| T | chr20 | <i>WISP2</i>     | 0.094408546 | -3.404938725 | 0.007955854 | 0.043031539 | Down |
| T | chr6  | <i>HIST1H2BM</i> | 1.86030617  | 0.895540081  | 0.004978774 | 0.030974293 | Up   |
| T | chr8  | <i>ANK1</i>      | 0.215518037 | -2.214119482 | 6.15E-08    | 7.24E-06    | Down |
| T | chr6  | <i>HIST1H2BO</i> | 0.369264346 | -1.437274125 | 4.46E-05    | 0.001085791 | Down |
| T | chr2  | <i>DCTN1</i>     | 0.396362095 | -1.335109094 | 1.89E-07    | 1.79E-05    | Down |
| T | chr22 | <i>CABIN1</i>    | 0.520129727 | -0.9430566   | 0.001368016 | 0.012960885 | Down |
| T | chr19 | <i>CHERP</i>     | 0.402696185 | -1.312236291 | 0.008078932 | 0.043534797 | Down |
| T | chr1  | <i>FBXO42</i>    | 0.456933536 | -1.129943764 | 0.001009406 | 0.010312227 | Down |
| T | chr1  | <i>ZFYVE9</i>    | 5.333877037 | 2.415184567  | 0.006842687 | 0.038796041 | Up   |
| T | chr1  | <i>ASPM</i>      | 1.887368565 | 0.91637618   | 0.002207021 | 0.017850463 | Up   |
| T | chr12 | <i>CHST11</i>    | 0.492986414 | -1.020380206 | 0.002263688 | 0.018179152 | Down |
| T | chr11 | <i>DNAJC24</i>   | 13.5209444  | 3.757124018  | 0.003188874 | 0.022845718 | Up   |
| T | chr10 | <i>NMT2</i>      | 1.870397306 | 0.903344757  | 0.006266749 | 0.036596243 | Up   |
| T | chr12 | <i>IFFO1</i>     | 0.3158684   | -1.662604479 | 4.48E-05    | 0.00108793  | Down |
| T | chr5  | <i>RAD17</i>     | 2.652232954 | 1.407207498  | 0.002893082 | 0.021396346 | Up   |
| T | chr12 | <i>NUAK1</i>     | 0.180505014 | -2.469889184 | 0.000785633 | 0.008584062 | Down |
| T | chr2  | <i>C2orf69</i>   | 2.787709645 | 1.479080305  | 0.003362122 | 0.023786463 | Up   |
| T | chr3  | <i>CADM2</i>     | 0.024299934 | -5.362903766 | 0.001336461 | 0.012767933 | Down |
| T | chr1  | <i>KCNN3</i>     | 0.053628156 | -4.22086555  | 0.00042967  | 0.005605479 | Down |
| T | chrX  | <i>UPRT</i>      | 2.394215447 | 1.259552981  | 0.001336885 | 0.012767933 | Up   |
| T | chr2  | <i>DDX1</i>      | 2.010121275 | 1.007282545  | 0.008501768 | 0.045160449 | Up   |
| T | chr17 | <i>CACNA1G</i>   | 0.016199956 | -5.947866266 | 6.01E-06    | 0.000250317 | Down |
| T | chr16 | <i>C16orf88</i>  | Inf         | Inf          | 2.23E-05    | 0.00064861  | Up   |
| T | chr13 | <i>IRS2</i>      | 0.358466896 | -1.480088201 | 0.000294124 | 0.00426424  | Down |
| T | chr16 | <i>WDR24</i>     | 0.515485698 | -0.955995693 | 0.004648545 | 0.029582888 | Down |
| T | chr18 | <i>IMPA2</i>     | 0.56222237  | -0.830787238 | 0.008686055 | 0.045896424 | Down |

|   |       |                 |             |              |             |             |      |
|---|-------|-----------------|-------------|--------------|-------------|-------------|------|
| T | chr13 | <i>N4BP2L2</i>  | 2.134001074 | 1.093560902  | 0.000135014 | 0.002442985 | Up   |
| T | chr11 | <i>PTDSS2</i>   | 0.348140663 | -1.522257764 | 9.80E-05    | 0.00193953  | Down |
| T | chr10 | <i>TMEM180</i>  | 0.239815184 | -2.060005088 | 8.90E-06    | 0.000332887 | Down |
| T | chr6  | <i>PRIM2</i>    | 2.984869565 | 1.577667889  | 0.000169234 | 0.002837832 | Up   |
| T | chr19 | <i>NACC1</i>    | 0.485022357 | -1.043876845 | 0.000137603 | 0.002480457 | Down |
| T | chr15 | <i>MYO9A</i>    | 2.568658969 | 1.361015362  | 6.60E-07    | 4.70E-05    | Up   |
| T | chr4  | <i>METAP1</i>   | 2.357061015 | 1.236989105  | 0.000190949 | 0.003086894 | Up   |
| T | chr1  | <i>RPRD2</i>    | 0.544365459 | -0.877352566 | 0.008864517 | 0.046537821 | Down |
| T | chr7  | <i>FASTK</i>    | 0.409853042 | -1.286821389 | 0.000338958 | 0.004727567 | Down |
| T | chr20 | <i>NAA20</i>    | 2.087286709 | 1.061628782  | 0.00879815  | 0.046319881 | Up   |
| T | chr19 | <i>SARS2</i>    | 0.363497502 | -1.459982646 | 0.000565647 | 0.006801323 | Down |
| T | chr1  | <i>HSP90B3P</i> | 2.26124086  | 1.177114671  | 0.005016605 | 0.031138374 | Up   |
| T | chr19 | <i>PPP6R1</i>   | 0.526511026 | -0.925464351 | 7.29E-05    | 0.001560701 | Down |
| T | chr19 | <i>PPP5C</i>    | 0.530119761 | -0.915609775 | 0.000586032 | 0.00696935  | Down |
| T | chr11 | <i>EHD1</i>     | 0.515465022 | -0.956053562 | 0.006327636 | 0.036721684 | Down |
| T | chrX  | <i>FOXO4</i>    | 0.379052143 | -1.399531772 | 6.51E-06    | 0.000267219 | Down |
| T | chr17 | <i>SSTR2</i>    | 0.287192069 | -1.799912186 | 1.26E-05    | 0.000426392 | Down |
| T | chr3  | <i>PBRM1</i>    | 1.581794681 | 0.661562349  | 0.00535004  | 0.032569584 | Up   |
| T | chr7  | <i>CADPS2</i>   | 4.043758027 | 2.015696671  | 3.72E-05    | 0.00094332  | Up   |
| T | chrX  | <i>HCFC1</i>    | 0.547144038 | -0.870007418 | 0.00665335  | 0.038086704 | Down |
| T | chr17 | <i>BRIP1</i>    | 2.21302677  | 1.146020903  | 0.000688725 | 0.00788859  | Up   |
| T | chr17 | <i>SMARCD2</i>  | 0.58115837  | -0.782996734 | 0.001180051 | 0.011627604 | Down |
| T | chr16 | <i>CYLD</i>     | 2.244984857 | 1.166705714  | 7.86E-06    | 0.000307269 | Up   |
| T | chr6  | <i>BCLAF1</i>   | 1.977454726 | 0.983644665  | 0.000246558 | 0.003740225 | Up   |
| T | chr19 | <i>CNOT3</i>    | 0.519806662 | -0.94395297  | 0.008830099 | 0.046413164 | Down |
| T | chr5  | <i>ACTBL2</i>   | 0.601308068 | -0.73382378  | 0.003498168 | 0.024469041 | Down |
| T | chr3  | <i>GNL3</i>     | 2.749742777 | 1.459296669  | 1.17E-06    | 7.30E-05    | Up   |
| T | chr19 | <i>KLC3</i>     | 0.335314497 | -1.576413235 | 0.003051657 | 0.022130939 | Down |
| T | chr3  | <i>POLQ</i>     | 1.797573732 | 0.846050948  | 0.007326566 | 0.040638767 | Up   |
| T | chrX  | <i>DOCK11</i>   | 2.124384371 | 1.087044821  | 7.82E-06    | 0.000307269 | Up   |
| T | chr3  | <i>CX3CR1</i>   | 0.153844866 | -2.700451798 | 0.002580947 | 0.019818147 | Down |
| T | chr17 | <i>VAT1</i>     | 0.509943696 | -0.971590131 | 0.000814414 | 0.008846663 | Down |
| T | chr6  | <i>MCM9</i>     | 2.142671385 | 1.099410606  | 0.001067956 | 0.010800426 | Up   |
| T | chr5  | <i>HNRNPA0</i>  | 0.587143169 | -0.768215762 | 0.001684534 | 0.014903786 | Down |
| T | chr10 | <i>TIMM23</i>   | 4.350564287 | 2.121202537  | 0.000164481 | 0.00279215  | Up   |
| T | chr18 | <i>ZNF397</i>   | 1.740040829 | 0.799121158  | 0.004062289 | 0.02689735  | Up   |
| T | chr12 | <i>HNF1A</i>    | 0           | #NAME?       | 0.001924739 | 0.016221027 | Down |
| T | chr17 | <i>UBB</i>      | 0.65464289  | -0.611219969 | 0.007953489 | 0.043031539 | Down |
| T | chr9  | <i>S1PR3</i>    | 0.188990646 | -2.403613268 | 2.60E-05    | 0.000716779 | Down |
| T | chr12 | <i>ANP32D</i>   | 6.153794629 | 2.621476297  | 0.003610659 | 0.024918224 | Up   |
| T | chr5  | <i>HK3</i>      | 0.55273896  | -0.855329791 | 0.001427147 | 0.013309484 | Down |
| T | chr19 | <i>DENND1C</i>  | 0.322561784 | -1.63235257  | 0.00781564  | 0.04244914  | Down |
| T | chr8  | <i>DSCC1</i>    | Inf         | Inf          | 2.31E-05    | 0.000661859 | Up   |
| T | chr3  | <i>TNK2</i>     | 0.313578854 | -1.673099818 | 0.000232197 | 0.003580659 | Down |

|   |       |                  |             |              |             |             |      |
|---|-------|------------------|-------------|--------------|-------------|-------------|------|
| T | chrX  | <i>ELK1</i>      | 0.422299574 | -1.243661302 | 0.000889615 | 0.009451069 | Down |
| T | chr14 | <i>C14orf159</i> | 0.306090221 | -1.70797114  | 0.002900305 | 0.021421581 | Down |
| T | chr1  | <i>PLK3</i>      | 0.185352702 | -2.431654952 | 0.001906819 | 0.016118001 | Down |
| T | chr20 | <i>PANK2</i>     | 1.7663452   | 0.820767319  | 0.002442049 | 0.019081009 | Up   |
| T | chr17 | <i>FBF1</i>      | 0.36411937  | -1.457516604 | 0.00187482  | 0.015934137 | Down |
| T | chr9  | <i>ENG</i>       | 0.399329521 | -1.324348365 | 0.004838945 | 0.030394262 | Down |
| T | chr13 | <i>ZIC5</i>      | 0.017701602 | -5.819976224 | 0.000113448 | 0.002148108 | Down |
| T | chrX  | <i>RLIM</i>      | 1.978213908 | 0.984198436  | 9.48E-05    | 0.001887277 | Up   |
| T | chr5  | <i>SLC27A6</i>   | Inf         | Inf          | 0.004462637 | 0.028841639 | Up   |
| T | chr14 | <i>SUPT16H</i>   | 1.589423313 | 0.668503411  | 0.007056235 | 0.039542804 | Up   |
| T | chr3  | <i>HLTF</i>      | 1.707278448 | 0.771698373  | 0.005364086 | 0.032624647 | Up   |
| T | chr2  | <i>ORC4</i>      | 2.393698271 | 1.25924131   | 4.35E-05    | 0.001071805 | Up   |
| T | chr17 | <i>TP53I13</i>   | 0.13800422  | -2.857215715 | 0.000427873 | 0.005595493 | Down |
| T | chr11 | <i>ZFP91</i>     | 2.244619311 | 1.166470784  | 0.000104198 | 0.002022865 | Up   |
| T | chr12 | <i>B4GALNT1</i>  | 0.414922408 | -1.269086523 | 5.81E-06    | 0.00024659  | Down |
| T | chr5  | <i>RAD50</i>     | 1.721205033 | 0.783418964  | 0.002624356 | 0.020057032 | Up   |
| T | chr8  | <i>RAD21-AS1</i> | 0.070886335 | -3.81834864  | 8.93E-11    | 2.77E-08    | Down |
| T | chr10 | <i>PPP2R2D</i>   | 2.374076268 | 1.247366283  | 0.003765997 | 0.025661744 | Up   |
| T | chr8  | <i>RB1CC1</i>    | 2.072188774 | 1.051155437  | 2.55E-05    | 0.000707107 | Up   |
| T | chr18 | <i>TXNL1</i>     | 1.816797733 | 0.861397811  | 0.00981157  | 0.049864334 | Up   |
| T | chr16 | <i>ZDHHC7</i>    | 0.438126511 | -1.190580579 | 0.009505251 | 0.048898068 | Down |
| T | chr14 | <i>C14orf166</i> | 1.765002777 | 0.819670453  | 0.002973244 | 0.021779303 | Up   |
| T | chr17 | <i>MAPK7</i>     | 0.449857396 | -1.152460352 | 0.004895309 | 0.030615628 | Down |
| T | chr6  | <i>BRD7P3</i>    | 4.881824461 | 2.28742042   | 0.005456393 | 0.033032069 | Up   |
| T | chr2  | <i>INPP1</i>     | 3.539440527 | 1.823521334  | 0.007986938 | 0.04314811  | Up   |
| T | chr8  | <i>CRISPLD1</i>  | 2.373803576 | 1.247200562  | 0.001598108 | 0.014347357 | Up   |
| T | chr11 | <i>FAR1</i>      | 1.746184031 | 0.804205614  | 0.002955133 | 0.021687073 | Up   |
| T | chr1  | <i>LMNA</i>      | 0.143867243 | -2.797189947 | 0.000107117 | 0.002064184 | Down |
| T | chr17 | <i>MTRNR2L1</i>  | 2.701359157 | 1.433685465  | 0.002269886 | 0.018189762 | Up   |
| T | chr19 | <i>ZC3H4</i>     | 0.480770622 | -1.056579354 | 4.38E-05    | 0.001074288 | Down |
| T | chr9  | <i>ZER1</i>      | 0.458691741 | -1.124403162 | 0.00280269  | 0.02093271  | Down |
| T | chrX  | <i>KIAA2022</i>  | 0.031469515 | -4.989901226 | 0.003080758 | 0.022279139 | Down |
| T | chr17 | <i>FAM222B</i>   | 0.259685432 | -1.94516301  | 4.99E-06    | 0.000223747 | Down |
| T | chr17 | <i>RAB11FIP4</i> | 0.361555967 | -1.467709109 | 1.42E-05    | 0.000461044 | Down |
| T | chr1  | <i>ACTA1</i>     | 0.151739392 | -2.720332429 | 4.92E-20    | 1.28E-16    | Down |
| T | chr11 | <i>IGF2</i>      | 0           | #NAME?       | 4.44E-05    | 0.001083561 | Down |
| T | chr3  | <i>TEX264</i>    | 0.298475269 | -1.744316695 | 2.08E-06    | 0.000114732 | Down |
| T | chr1  | <i>S100A11</i>   | 0.334892034 | -1.578232034 | 0.000166019 | 0.002805545 | Down |
| T | chr8  | <i>ADCY8</i>     | 0.028322564 | -5.141904319 | 0.002536324 | 0.019590815 | Down |
| T | chr17 | <i>COL1A1</i>    | 0.096083261 | -3.37957107  | 0.002678325 | 0.020302983 | Down |
| T | chr12 | <i>CKAP4</i>     | 0.387664709 | -1.367118688 | 1.56E-05    | 0.000493218 | Down |
| T | chr16 | <i>MAPK3</i>     | 0.43386881  | -1.204669219 | 2.47E-05    | 0.000694622 | Down |
| T | chr8  | <i>MYC</i>       | 0.318239548 | -1.651814961 | 0.000172116 | 0.002872789 | Down |
| T | chr6  | <i>EYA4</i>      | 0.068119016 | -3.875798584 | 0.000551826 | 0.006659936 | Down |

|   |       |                 |             |              |             |             |      |
|---|-------|-----------------|-------------|--------------|-------------|-------------|------|
| T | chr15 | <i>FES</i>      | 0.52587024  | -0.92722124  | 0.000461161 | 0.005898341 | Down |
| T | chr1  | <i>EFHD2</i>    | 0.408210333 | -1.292615392 | 0.001507062 | 0.013787609 | Down |
| T | chr12 | <i>SLC6A15</i>  | 3.457322691 | 1.789655265  | 0.008608684 | 0.045616935 | Up   |
| T | chr22 | <i>UQCR10</i>   | 0.37145293  | -1.42874869  | 0.00630046  | 0.036647452 | Down |
| T | chr19 | <i>PRKCSH</i>   | 0.480761537 | -1.056606616 | 0.00101586  | 0.010370037 | Down |
| T | chr9  | <i>TMEM8B</i>   | 0.156382756 | -2.676846656 | 2.30E-05    | 0.00065977  | Down |
| T | chr3  | <i>FYTTD1</i>   | 2.955679128 | 1.563489657  | 5.84E-05    | 0.001333889 | Up   |
| T | chr3  | <i>TADA3</i>    | 0.448371476 | -1.157233593 | 0.000330492 | 0.004656151 | Down |
| T | chr19 | <i>NAPSA</i>    | 0.44491507  | -1.16839813  | 0.004991331 | 0.031036294 | Down |
| T | chr9  | <i>TGFBR1</i>   | 2.478748057 | 1.309611641  | 9.04E-06    | 0.000335907 | Up   |
| T | chr9  | <i>OGN</i>      | 7.789443024 | 2.961520174  | 0.003627777 | 0.024967505 | Up   |
| T | chr19 | <i>SCAMP4</i>   | 0.339732211 | -1.557530084 | 0.006769975 | 0.038534507 | Down |
| T | chr11 | <i>CKAP5</i>    | 1.534273535 | 0.617555713  | 0.009590849 | 0.049144628 | Up   |
| T | chr11 | <i>TBRG1</i>    | 1.913671859 | 0.93634347   | 0.003542695 | 0.024662756 | Up   |
| T | chrX  | <i>PAK3</i>     | 2.189688031 | 1.130725341  | 0.005087074 | 0.031467977 | Up   |
| T | chr6  | <i>EXOC2</i>    | 2.13963715  | 1.097366158  | 6.02E-05    | 0.00135951  | Up   |
| T | chr17 | <i>WDR81</i>    | 0.401652634 | -1.315979758 | 0.003546474 | 0.024675892 | Down |
| T | chr11 | <i>C11orf68</i> | 0.463658802 | -1.108864552 | 0.001233461 | 0.011981931 | Down |
| T | chr22 | <i>KCTD17</i>   | 0.239510355 | -2.061840062 | 0.000235409 | 0.003604637 | Down |
| T | chr2  | <i>RIF1</i>     | 2.407254094 | 1.267388431  | 9.94E-07    | 6.39E-05    | Up   |
| T | chr15 | <i>RPAP1</i>    | 0.365499703 | -1.452057861 | 1.07E-05    | 0.000376935 | Down |
| T | chr5  | <i>PJA2</i>     | 2.151099949 | 1.10507456   | 0.000349273 | 0.004826923 | Up   |
| T | chr14 | <i>DDHD1</i>    | 2.120092853 | 1.084127452  | 0.003007311 | 0.021898367 | Up   |
| T | chr12 | <i>PLBD2</i>    | 0.409243427 | -1.288968848 | 0.007987328 | 0.04314811  | Down |
| T | chr6  | <i>BAG6</i>     | 0.358727438 | -1.479039998 | 8.18E-05    | 0.001704099 | Down |
| T | chr19 | <i>ELANE</i>    | 0.284324768 | -1.814388314 | 3.70E-05    | 0.000941841 | Down |
| T | chr11 | <i>FAM118B</i>  | 2.17355198  | 1.120054598  | 0.00574357  | 0.034387614 | Up   |
| T | chr19 | <i>CIC</i>      | 0.377434536 | -1.405701658 | 0.001490824 | 0.013716002 | Down |
| T | chr9  | <i>PTGES2</i>   | 0.301023669 | -1.732051164 | 0.000326935 | 0.004626018 | Down |
| T | chr1  | <i>SNORA14B</i> | 0.522958063 | -0.935232837 | 0.004847153 | 0.030416528 | Down |
| T | chr6  | <i>ATF6B</i>    | 0.215090111 | -2.216986899 | 7.30E-10    | 1.80E-07    | Down |
| T | chr10 | <i>METTL10</i>  | 2.137934679 | 1.096217774  | 0.005772255 | 0.034527666 | Up   |
| T | chr1  | <i>LUZP1</i>    | 2.696335964 | 1.431000268  | 0.000200869 | 0.003207516 | Up   |
| T | chr2  | <i>TET3</i>     | 0.430997585 | -1.214248311 | 0.00231194  | 0.018368799 | Down |
| T | chr14 | <i>TRIP11</i>   | 1.987779649 | 0.991157839  | 0.000887867 | 0.009440192 | Up   |
| T | chr19 | <i>SSBP4</i>    | 0.174536662 | -2.518397983 | 7.54E-06    | 0.000298092 | Down |
| T | chr12 | <i>ALDH2</i>    | 0.439479005 | -1.186133849 | 1.34E-06    | 8.17E-05    | Down |
| T | chr5  | <i>GALNT10</i>  | 0.425108387 | -1.234097374 | 0.000274442 | 0.004027418 | Down |
| T | chr17 | <i>UNC13D</i>   | 0.458315927 | -1.125585674 | 1.06E-05    | 0.000376935 | Down |
| T | chr6  | <i>HACE1</i>    | 1.790134217 | 0.840067759  | 0.008415396 | 0.044756321 | Up   |
| T | chr7  | <i>PUS7</i>     | 2.020039988 | 1.014383852  | 0.000739747 | 0.008241455 | Up   |
| T | chr20 | <i>SYS1</i>     | 0.180670935 | -2.468563659 | 2.55E-09    | 5.20E-07    | Down |
| T | chr4  | <i>ARFIP1</i>   | 2.175911542 | 1.121619908  | 0.000697188 | 0.00796455  | Up   |
| T | chr7  | <i>RPS2P32</i>  | 0.50703942  | -0.979830181 | 0.00099945  | 0.010250583 | Down |

|   |       |                 |             |              |             |             |      |
|---|-------|-----------------|-------------|--------------|-------------|-------------|------|
| T | chr19 | <i>SPRED3</i>   | 0.224567396 | -2.154779613 | 0.003425898 | 0.02408582  | Down |
| T | chr3  | <i>NBEAL2</i>   | 0.347816272 | -1.523602665 | 0.000517158 | 0.006363919 | Down |
| T | chr1  | <i>RGS18</i>    | 3.313237923 | 1.728241807  | 0.000292065 | 0.004243074 | Up   |
| T | chr19 | <i>RAB3A</i>    | 0.307941885 | -1.699269983 | 0.004931814 | 0.030799639 | Down |
| T | chr16 | <i>LMF1</i>     | 0.317005294 | -1.65742116  | 0.001166737 | 0.011539992 | Down |
| T | chr22 | <i>TTL12</i>    | 0.229511262 | -2.123363145 | 2.31E-09    | 4.77E-07    | Down |
| T | chr14 | <i>KTN1</i>     | 3.078827868 | 1.622381211  | 1.04E-08    | 1.64E-06    | Up   |
| T | chr8  | <i>DOK2</i>     | 0.395275957 | -1.33906789  | 0.00746162  | 0.041090882 | Down |
| T | chr1  | <i>SMG5</i>     | 0.621252424 | -0.68674852  | 0.006647943 | 0.03807246  | Down |
| T | chr1  | <i>WASF2</i>    | 0.4129996   | -1.27578771  | 0.000766962 | 0.008443704 | Down |
| T | chr19 | <i>FBXO46</i>   | 0.306656485 | -1.705304634 | 9.32E-05    | 0.001865857 | Down |
| T | chr19 | <i>QTRT1</i>    | 0.243207619 | -2.039739669 | 0.000252831 | 0.003817637 | Down |
| T | chr12 | <i>TMPO</i>     | 1.664862849 | 0.735403334  | 0.002267652 | 0.018189762 | Up   |
| T | chr12 | <i>ARF3</i>     | 0.405953722 | -1.300612822 | 0.000110618 | 0.002113201 | Down |
| T | chr16 | <i>WDR90</i>    | 0.378164037 | -1.402915924 | 0.000516186 | 0.006363919 | Down |
| T | chr1  | <i>ZNF644</i>   | 2.121663616 | 1.085195939  | 1.74E-05    | 0.000538763 | Up   |
| T | chr17 | <i>SLFN11</i>   | 2.886123175 | 1.529132873  | 0.000368382 | 0.005011376 | Up   |
| T | chr12 | <i>TUBA1A</i>   | 0.607836123 | -0.718245679 | 0.00474325  | 0.029980833 | Down |
| T | chr12 | <i>TUBA1B</i>   | 0.531902365 | -0.910766644 | 9.18E-05    | 0.001842422 | Down |
| T | chr10 | <i>JMJD1C</i>   | 1.609765734 | 0.686850751  | 0.003872368 | 0.026175604 | Up   |
| T | chr9  | <i>LPAR1</i>    | 0.201607377 | -2.310379664 | 0.002244267 | 0.018073274 | Down |
| T | chr11 | <i>KIF18A</i>   | 1.970168531 | 0.978319045  | 0.005927237 | 0.035237286 | Up   |
| T | chr5  | <i>DCP2</i>     | 1.802095793 | 0.849675702  | 0.003358    | 0.023770194 | Up   |
| T | chr12 | <i>DENND5B</i>  | 1.960264281 | 0.97104817   | 0.006300019 | 0.036647452 | Up   |
| T | chr19 | <i>GMIP</i>     | 0.391416359 | -1.353224042 | 0.002722565 | 0.020542845 | Down |
| T | chr19 | <i>ZNF121</i>   | 4.366107519 | 2.126347658  | 8.34E-05    | 0.001719865 | Up   |
| T | chr9  | <i>TEK</i>      | 3.648672439 | 1.867371638  | 3.23E-07    | 2.72E-05    | Up   |
| T | chr15 | <i>HERC1</i>    | 1.521286248 | 0.605291638  | 0.009652604 | 0.049344776 | Up   |
| T | chr10 | <i>TET1</i>     | 3.831057492 | 1.937742676  | 0.002138751 | 0.017498398 | Up   |
| T | chr14 | <i>TECPR2</i>   | 0.447704018 | -1.15938283  | 0.001096022 | 0.011007473 | Down |
| T | chr22 | <i>C22orf28</i> | 1.66249599  | 0.733350861  | 0.004011673 | 0.02668161  | Up   |
| T | chr10 | <i>LDB1</i>     | 0.44252913  | -1.176155669 | 4.12E-07    | 3.30E-05    | Down |
| T | chr11 | <i>GANAB</i>    | 0.622325749 | -0.684258154 | 0.003531021 | 0.024594609 | Down |
| T | chr9  | <i>JAK2</i>     | 1.998441581 | 0.9988754    | 0.000109132 | 0.002096816 | Up   |
| T | chr1  | <i>SNORA16A</i> | 0.09018545  | -3.470961489 | 1.20E-11    | 4.67E-09    | Down |
| T | chr19 | <i>CKM</i>      | 0.016199956 | -5.947866266 | 1.87E-05    | 0.000564804 | Down |
| T | chr2  | <i>CUL3</i>     | 1.538476326 | 0.621502244  | 0.00896314  | 0.046773247 | Up   |
| T | chr10 | <i>MAPK8</i>    | 1.78853315  | 0.838776859  | 0.003286225 | 0.023401793 | Up   |
| T | chr14 | <i>PELI2</i>    | 0.35238896  | -1.504759367 | 0.000226102 | 0.003519956 | Down |
| T | chr1  | <i>EXOC8</i>    | 0.377719984 | -1.404610982 | 0.002889398 | 0.021381216 | Down |
| T | chrX  | <i>SHROOM4</i>  | 5.393305326 | 2.43116971   | 0.0012014   | 0.011766867 | Up   |
| T | chr20 | <i>E2F1</i>     | 0.335279542 | -1.576563637 | 0.001244487 | 0.012071065 | Down |
| T | chr15 | <i>GLCE</i>     | 1.898780229 | 0.925072933  | 0.00204538  | 0.016961751 | Up   |
| T | chr9  | <i>LRRC8A</i>   | 0.375002309 | -1.415028618 | 4.06E-07    | 3.27E-05    | Down |

|   |       |                 |             |              |             |             |      |
|---|-------|-----------------|-------------|--------------|-------------|-------------|------|
| T | chr7  | <i>PHTF2</i>    | 2.125747778 | 1.08797043   | 0.000176614 | 0.002927703 | Up   |
| T | chr17 | <i>TAOK1</i>    | 1.642362039 | 0.715772187  | 0.002955666 | 0.021687073 | Up   |
| T | chr16 | <i>NAE1</i>     | 4.203735392 | 2.07167186   | 1.95E-07    | 1.82E-05    | Up   |
| T | chr8  | <i>ESCO2</i>    | 2.490277167 | 1.316306323  | 0.005321958 | 0.032433202 | Up   |
| T | chr2  | <i>TMEM87B</i>  | 2.671737467 | 1.417778251  | 0.0049617   | 0.030882793 | Up   |
| T | chr17 | <i>KIF1C</i>    | 0.508274998 | -0.976318827 | 0.006370476 | 0.03695386  | Down |
| T | chr11 | <i>PYGM</i>     | 0.478339819 | -1.063892203 | 0.000713799 | 0.008055558 | Down |
| T | chr22 | <i>C22orf32</i> | 0.528203983 | -0.920832915 | 0.007142359 | 0.039918082 | Down |
| T | chrX  | <i>GPRASP1</i>  | 4.039817584 | 2.01429015   | 7.41E-05    | 0.001578662 | Up   |
| T | chr13 | <i>LNX2</i>     | 0.15967357  | -2.646802563 | 0.001273102 | 0.012257486 | Down |
| T | chr1  | <i>THBS3</i>    | 0.051495571 | -4.279407843 | 0.001463262 | 0.013577326 | Down |
| T | chr9  | <i>C9orf89</i>  | 0.453258201 | -1.141594971 | 0.002674033 | 0.020282226 | Down |
| T | chr7  | <i>FBXL18</i>   | 0.27768798  | -1.848463364 | 0.001358317 | 0.012906489 | Down |
| T | chr17 | <i>PFN1</i>     | 0.616732063 | -0.697284244 | 0.002146216 | 0.017543569 | Down |
| T | chr5  | <i>NDST1</i>    | 0.418990928 | -1.255009089 | 4.42E-06    | 0.000204976 | Down |
| T | chr4  | <i>BBS12</i>    | 5.32620126  | 2.413106945  | 0.00037112  | 0.005038119 | Up   |
| T | chr19 | <i>SNORD32A</i> | 0.342755763 | -1.544747172 | 0.002079644 | 0.017182418 | Down |
| T | chr5  | <i>MEGF10</i>   | 0.023602137 | -5.404938725 | 0.000846118 | 0.009077673 | Down |
| T | chr4  | <i>POLR2B</i>   | 1.664517455 | 0.735103999  | 0.004472377 | 0.028841639 | Up   |
| T | chr11 | <i>ZNF202</i>   | 5.265041029 | 2.396444774  | 0.009252503 | 0.047938105 | Up   |
| T | chr11 | <i>RPS6KA4</i>  | 0.356646554 | -1.487433063 | 0.000189533 | 0.003084282 | Down |
| T | chr11 | <i>SPI1</i>     | 0.451708673 | -1.146535481 | 6.33E-05    | 0.001401491 | Down |
| T | chr17 | <i>ARHGAP23</i> | 0.356420382 | -1.488348253 | 0.000256569 | 0.003860731 | Down |
| T | chr17 | <i>ARHGAP27</i> | 0.274916702 | -1.862933536 | 3.15E-08    | 4.19E-06    | Down |
| T | chr10 | <i>VTI1A</i>    | 2.005905203 | 1.004253427  | 0.00356537  | 0.024734629 | Up   |
| T | chr5  | <i>HNRNPH1</i>  | 1.782682146 | 0.834049492  | 0.000412319 | 0.005454353 | Up   |
| T | chr17 | <i>FLCN</i>     | 0.485312999 | -1.043012591 | 0.000571002 | 0.006834213 | Down |
| T | chr3  | <i>MAP4</i>     | 0.500980215 | -0.997174465 | 0.002910653 | 0.021465449 | Down |
| T | chr10 | <i>CUL2</i>     | 1.738077853 | 0.797492705  | 0.0055262   | 0.033377224 | Up   |
| T | chr12 | <i>ZNF384</i>   | 0.591551644 | -0.757423969 | 0.002885893 | 0.021371745 | Down |
| T | chr18 | <i>THOC1</i>    | 2.231465521 | 1.157991515  | 0.001005234 | 0.010277649 | Up   |
| T | chr1  | <i>GGPS1</i>    | 2.174700218 | 1.12081654   | 0.003083084 | 0.022283606 | Up   |
| T | chr13 | <i>SACS</i>     | 2.202533694 | 1.13916409   | 4.54E-06    | 0.000208663 | Up   |
| T | chr16 | <i>YPEL3</i>    | 0.346379257 | -1.52957556  | 5.84E-07    | 4.28E-05    | Down |
| T | chr12 | <i>ELK3</i>     | 0.505362612 | -0.98460916  | 0.000116982 | 0.002192739 | Down |
| T | chr1  | <i>KLHL21</i>   | 0.386358355 | -1.371988497 | 0.006637786 | 0.038030989 | Down |
| T | chr19 | <i>ZNF600</i>   | Inf         | Inf          | 0.003344285 | 0.023698829 | Up   |
| T | chr16 | <i>PGP</i>      | 0.381792933 | -1.389137695 | 0.000189606 | 0.003084282 | Down |
| T | chr19 | <i>ZNF606</i>   | 3.106946894 | 1.635497582  | 8.38E-07    | 5.70E-05    | Up   |
| T | chr16 | <i>FBXO31</i>   | 0.290808544 | -1.78185844  | 1.02E-05    | 0.00036609  | Down |
| T | chr11 | <i>FAM168A</i>  | 0.309568063 | -1.691671453 | 4.58E-06    | 0.000208898 | Down |
| T | chr11 | <i>ZNF214</i>   | 4.865241301 | 2.28251136   | 8.27E-05    | 0.001714797 | Up   |
| T | chr1  | <i>ZNF678</i>   | Inf         | Inf          | 0.009388892 | 0.048476181 | Up   |
| T | chr20 | <i>NCOR1P1</i>  | 0.394064484 | -1.343496368 | 0.006976989 | 0.039245741 | Down |

|   |       |                 |             |              |             |             |      |
|---|-------|-----------------|-------------|--------------|-------------|-------------|------|
| T | chr12 | <i>ANKRD52</i>  | 0.386201717 | -1.372573516 | 0.004004712 | 0.026677157 | Down |
| T | chr10 | <i>DPYSL4</i>   | 0.064494407 | -3.954682132 | 4.83E-07    | 3.68E-05    | Down |
| T | chr9  | <i>PPP2R4</i>   | 0.502994095 | -0.991386632 | 8.02E-05    | 0.001674609 | Down |
| T | chr12 | <i>CEP290</i>   | 2.196493766 | 1.135202405  | 0.000477048 | 0.006036434 | Up   |
| T | chrX  | <i>STAG2</i>    | 2.066252803 | 1.047016777  | 0.000106189 | 0.002049319 | Up   |
| T | chr12 | <i>SPPL3</i>    | 0.507411592 | -0.978771616 | 0.000255428 | 0.00385239  | Down |
| T | chr6  | <i>COL9A1</i>   | 0.035403205 | -4.819976224 | 0.008351944 | 0.044544921 | Down |
| T | chr16 | <i>ALDOA</i>    | 0.567987096 | -0.81606994  | 0.000476884 | 0.006036434 | Down |
| T | chrX  | <i>POLA1</i>    | 2.103449566 | 1.072757228  | 1.83E-05    | 0.000560103 | Up   |
| T | chr3  | <i>ATP2C1</i>   | 2.261460907 | 1.177255057  | 1.17E-05    | 0.00040418  | Up   |
| T | chr8  | <i>RRM2B</i>    | 2.151359671 | 1.105248739  | 0.009551532 | 0.049020178 | Up   |
| T | chr14 | <i>WDHD1</i>    | 1.874909924 | 0.906821286  | 0.00092501  | 0.009684595 | Up   |
| T | chr4  | <i>FAM114A1</i> | 0.394883348 | -1.340501562 | 0.009197203 | 0.047708434 | Down |
| T | chr3  | <i>ADAMTS9</i>  | 0.079604186 | -3.651011896 | 0.000504184 | 0.006270338 | Down |
| T | chr7  | <i>CHN2</i>     | 2.159385326 | 1.110620704  | 0.003652698 | 0.025107006 | Up   |
| T | chr9  | <i>TOPORS</i>   | 1.964442283 | 0.974119781  | 0.000399075 | 0.005323445 | Up   |
| T | chr9  | <i>TAF1L</i>    | 2.555077867 | 1.353367259  | 4.58E-06    | 0.000208898 | Up   |
| T | chr20 | <i>TSHZ2</i>    | 0.081918465 | -3.609667503 | 6.22E-08    | 7.24E-06    | Down |
| T | chr9  | <i>OMD</i>      | 4.193709352 | 2.068226878  | 0.007135799 | 0.039918082 | Up   |
| T | chr16 | <i>THOC6</i>    | 0.358067806 | -1.481695284 | 0.000736858 | 0.008231814 | Down |
| T | chr1  | <i>USP1</i>     | 1.916039222 | 0.938127094  | 0.000615531 | 0.007263894 | Up   |
| T | chr1  | <i>MCL1</i>     | 1.633393185 | 0.707872114  | 0.007852358 | 0.042542302 | Up   |
| T | chr1  | <i>ZNF684</i>   | 14.64547338 | 3.872382921  | 0.002102334 | 0.017293225 | Up   |
| T | chr19 | <i>ERCC2</i>    | 0.563429095 | -0.827694029 | 0.005386672 | 0.032731494 | Down |
| T | chr11 | <i>CPT1A</i>    | 0.522972117 | -0.935194065 | 0.008056687 | 0.043432866 | Down |
| T | chr3  | <i>LRRC33</i>   | 0.55748006  | -0.843007891 | 0.000865829 | 0.009258688 | Down |
| T | chr1  | <i>ZNF687</i>   | 0.377580937 | -1.405142166 | 2.28E-07    | 2.05E-05    | Down |
| T | chr7  | <i>SNX10</i>    | 2.618092001 | 1.388515795  | 4.86E-05    | 0.001151867 | Up   |
| T | chr3  | <i>B3GNT5</i>   | 2.288805595 | 1.194594929  | 0.009415383 | 0.048569826 | Up   |
| T | chr2  | <i>CNNM3</i>    | 0.329327727 | -1.602404115 | 1.26E-05    | 0.000426824 | Down |
| T | chr7  | <i>SNX13</i>    | 2.06927094  | 1.049122557  | 0.000140713 | 0.002516987 | Up   |
| T | chr14 | <i>RPPH1</i>    | 0.242130875 | -2.046141041 | 9.72E-05    | 0.001926812 | Down |
| T | chr5  | <i>MOCS2</i>    | 3.315653106 | 1.729293075  | 0.001147426 | 0.011420723 | Up   |
| T | chr19 | <i>ZNF160</i>   | 3.379538302 | 1.756826165  | 0.001177547 | 0.011627038 | Up   |
| T | chr11 | <i>RAB38</i>    | 1.778511965 | 0.83067068   | 0.00213046  | 0.017447575 | Up   |
| T | chr3  | <i>ALCAM</i>    | 1.784753442 | 0.835724784  | 0.006407936 | 0.037089877 | Up   |
| T | chr19 | <i>KHSRP</i>    | 0.356433841 | -1.488293777 | 0.000670085 | 0.007719757 | Down |
| T | chr19 | <i>NCLN</i>     | 0.451076591 | -1.148555677 | 0.001513449 | 0.013836335 | Down |
| T | chr12 | <i>SHMT2</i>    | 0.448792907 | -1.155878219 | 5.21E-05    | 0.001222469 | Down |
| T | chr6  | <i>KIAA1009</i> | 3.793425349 | 1.923501147  | 1.32E-05    | 0.00043963  | Up   |
| T | chr2  | <i>SLC4A1AP</i> | 2.16912443  | 1.117112814  | 0.002321482 | 0.018410972 | Up   |
| T | chr3  | <i>SCAP</i>     | 0.51537663  | -0.956300975 | 0.000138442 | 0.002488978 | Down |
| T | chr15 | <i>IMP3</i>     | 0.338136635 | -1.564321762 | 9.46E-05    | 0.001887277 | Down |
| T | chrX  | <i>PGRMC1</i>   | 2.000493443 | 1.0003559    | 0.001378395 | 0.013002562 | Up   |

|   |       |                |             |              |             |             |      |
|---|-------|----------------|-------------|--------------|-------------|-------------|------|
| T | chr19 | <i>ZNF625</i>  | 2.669040758 | 1.416321336  | 6.48E-07    | 4.65E-05    | Up   |
| T | chr4  | <i>WHSC1</i>   | 1.689924555 | 0.75695884   | 0.002163127 | 0.017595063 | Up   |
| T | chr22 | <i>MN1</i>     | 0.289658532 | -1.787574932 | 0.000452724 | 0.005824696 | Down |
| T | chr19 | <i>ZNF628</i>  | 0.108892336 | -3.199025681 | 1.49E-07    | 1.50E-05    | Down |
| T | chr16 | <i>SLC38A7</i> | 0.31071428  | -1.686339548 | 0.000464013 | 0.0059141   | Down |
| T | chr7  | <i>REPIN1</i>  | 0.496878983 | -1.009033575 | 0.004444416 | 0.028803703 | Down |
| T | chr1  | <i>WDTG1</i>   | 0.436026302 | -1.197512932 | 0.002122169 | 0.017401517 | Down |
| T | chr15 | <i>TLE3</i>    | 0.404640065 | -1.305288921 | 1.50E-05    | 0.000478046 | Down |
| T | chr5  | <i>PCYOX1L</i> | 0.401195253 | -1.31762356  | 0.00205489  | 0.017010216 | Down |
| T | chr3  | <i>CLCN2</i>   | 0.355682948 | -1.491336285 | 0.00076326  | 0.008410043 | Down |
| T | chr6  | <i>SNX14</i>   | 1.884613327 | 0.914268551  | 0.003896511 | 0.026297921 | Up   |
| T | chr14 | <i>AP1G2</i>   | 0.488772607 | -1.032764661 | 0.000549279 | 0.006647391 | Down |
| T | chr8  | <i>TIGD5</i>   | 0           | #NAME?       | 0.002470651 | 0.019254547 | Down |
| T | chr20 | <i>ZNF335</i>  | 0.559773878 | -0.837083929 | 0.004551429 | 0.029222031 | Down |
| T | chr10 | <i>KIF11</i>   | 2.029137568 | 1.020866677  | 7.31E-05    | 0.001562673 | Up   |
| T | chr7  | <i>CCDC132</i> | 2.005890923 | 1.004243157  | 0.000760128 | 0.008396805 | Up   |
| T | chr1  | <i>AHDC1</i>   | 0.291825427 | -1.776822502 | 0.004141328 | 0.027286753 | Down |
| T | chr3  | <i>SNORA62</i> | 0.169312415 | -2.562240333 | 5.62E-05    | 0.001295556 | Down |
| T | chr2  | <i>DNAH6</i>   | 0           | #NAME?       | 2.87E-05    | 0.000771707 | Down |
| T | chr2  | <i>DNAH7</i>   | 0.254857448 | -1.972237582 | 0.004682625 | 0.029770726 | Down |
| T | chr12 | <i>ZDHC17</i>  | 1.720152488 | 0.782536463  | 0.004780168 | 0.030112056 | Up   |
| T | chr2  | <i>DNAJC27</i> | 2.28771339  | 1.193906319  | 0.009290722 | 0.04805978  | Up   |
| T | chrX  | <i>CASK</i>    | 1.770601633 | 0.824239657  | 0.007553875 | 0.041389272 | Up   |
| T | chr6  | <i>MLLT4</i>   | 3.369655063 | 1.752600916  | 1.42E-07    | 1.45E-05    | Up   |
| T | chrX  | <i>MAGEE1</i>  | 12.62102603 | 3.657757295  | 0.006717056 | 0.038316886 | Up   |
| T | chr1  | <i>PTBP2</i>   | 2.337886125 | 1.22520466   | 1.09E-05    | 0.000381777 | Up   |
| T | chr1  | <i>TMEM63A</i> | 0.532814796 | -0.908293948 | 0.004715709 | 0.029899235 | Down |
| T | chr6  | <i>SLC39A7</i> | 0.546392304 | -0.871990931 | 0.001654664 | 0.014724931 | Down |
| T | chr17 | <i>ASPSR1</i>  | 0.463422784 | -1.109599121 | 0.002553127 | 0.019677311 | Down |
| T | chr17 | <i>MIF4GD</i>  | 0.32372705  | -1.627150177 | 8.23E-05    | 0.001708978 | Down |
| T | chrX  | <i>HTATSF1</i> | 1.886474121 | 0.915692309  | 0.006310438 | 0.036653079 | Up   |
| T | chrX  | <i>ARHGEF6</i> | 1.839267362 | 0.87913121   | 0.000450732 | 0.005804781 | Up   |
| T | chr16 | <i>PLK1</i>    | 0.348109648 | -1.522386296 | 8.27E-06    | 0.000317463 | Down |
| T | chr12 | <i>LPCAT3</i>  | 0.510109637 | -0.971120739 | 0.000702903 | 0.007980915 | Down |
| T | chr1  | <i>NOS1AP</i>  | 0.324890407 | -1.62197495  | 0.005307778 | 0.03238787  | Down |
| T | chr1  | <i>MEF2D</i>   | 0.281678994 | -1.827876117 | 2.71E-07    | 2.36E-05    | Down |
| T | chr20 | <i>TRPC4AP</i> | 0.56539564  | -0.822667336 | 0.002097439 | 0.017283491 | Down |
| T | chr10 | <i>TRIM8</i>   | 0.395655431 | -1.337683533 | 2.09E-06    | 0.000114846 | Down |
| T | chr18 | <i>CTIF</i>    | 0.271732412 | -1.879741436 | 0.000912568 | 0.009601095 | Down |
| T | chrY  | <i>ZFY</i>     | 2.522100586 | 1.334625814  | 7.43E-05    | 0.001580736 | Up   |
| T | chr5  | <i>MSH3</i>    | 2.643292126 | 1.402335875  | 0.000139292 | 0.002496164 | Up   |
| T | chr7  | <i>CHST12</i>  | 0.358030747 | -1.481844607 | 0.000554287 | 0.00667703  | Down |
| T | chr19 | <i>ZNF180</i>  | 3.296922039 | 1.721119773  | 1.94E-05    | 0.000582207 | Up   |
| T | chr10 | <i>ANXA11</i>  | 0.506022203 | -0.982727406 | 0.000446223 | 0.005769495 | Down |

|   |       |                |             |              |             |             |      |
|---|-------|----------------|-------------|--------------|-------------|-------------|------|
| T | chr15 | <i>FANCI</i>   | 2.46465242  | 1.301384204  | 0.000900341 | 0.00951081  | Up   |
| T | chr22 | <i>FBXW4P1</i> | 0.276779793 | -1.853189475 | 3.91E-05    | 0.000980346 | Down |
| T | chr11 | <i>EML3</i>    | 0.465445634 | -1.10331543  | 8.88E-05    | 0.001792761 | Down |
| T | chr3  | <i>SNORA7B</i> | 0.37002869  | -1.434290963 | 0.00020518  | 0.003252467 | Down |
| T | chr17 | <i>PELP1</i>   | 0.390228859 | -1.357607621 | 3.43E-05    | 0.000885191 | Down |
| T | chr8  | <i>ATAD2</i>   | 1.995308596 | 0.996611892  | 8.53E-05    | 0.001746459 | Up   |
| T | chr6  | <i>ABCC10</i>  | 0.326622404 | -1.614304343 | 0.000288777 | 0.004201688 | Down |
| T | chr6  | <i>TULP4</i>   | 0.286761148 | -1.80207852  | 0.000354879 | 0.004894024 | Down |
| T | chr1  | <i>ZBTB41</i>  | 2.186097298 | 1.128357613  | 0.000183275 | 0.003018941 | Up   |
| T | chr4  | <i>TIGD2</i>   | 2.947090618 | 1.559291421  | 3.22E-05    | 0.000843825 | Up   |
| T | chr11 | <i>CD3E</i>    | 0.035403205 | -4.819976224 | 0.008351944 | 0.044544921 | Down |
| T | chr16 | <i>ZNF48</i>   | 0.469900548 | -1.089572644 | 0.005910316 | 0.03518341  | Down |
| T | chr14 | <i>IRF2BPL</i> | 0.418915901 | -1.255267448 | 0.002111511 | 0.017335921 | Down |
| T | chr8  | <i>FBXL6</i>   | 0.448727883 | -1.156087262 | 0.003512766 | 0.02451982  | Down |
| T | chr1  | <i>LGALS8</i>  | 3.452670705 | 1.787712745  | 0.004055981 | 0.026882534 | Up   |
| T | chr1  | <i>NAV1</i>    | 0.354526505 | -1.496034604 | 0.003684597 | 0.025259721 | Down |
| T | chr22 | <i>SBF1</i>    | 0.443597464 | -1.172676976 | 4.78E-05    | 0.001139665 | Down |
| T | chr3  | <i>SNORA81</i> | 0.089491893 | -3.482099199 | 1.07E-41    | 1.39E-37    | Down |
| T | chr4  | <i>HAUS3</i>   | 2.454030158 | 1.295152979  | 1.92E-05    | 0.000578068 | Up   |
| T | chr17 | <i>EIF1</i>    | 0.518457739 | -0.947701699 | 0.001950001 | 0.016370469 | Down |
| T | chr5  | <i>GDNF</i>    | 0           | #NAME?       | 0.000189206 | 0.003084282 | Down |
| T | chr1  | <i>SEPN1</i>   | 0.359272667 | -1.476848914 | 8.31E-05    | 0.001717938 | Down |
| T | chr4  | <i>SNX25</i>   | 2.780565595 | 1.475378372  | 0.004057313 | 0.026882534 | Up   |
| T | chr11 | <i>RHOG</i>    | 0.267605866 | -1.901818355 | 4.31E-12    | 2.16E-09    | Down |
| T | chr11 | <i>RAB6A</i>   | 1.781224356 | 0.832869244  | 0.008872815 | 0.046538548 | Up   |
| T | chr1  | <i>ACBD6</i>   | 0.487624208 | -1.036158346 | 0.003560799 | 0.024734629 | Down |
| T | chr17 | <i>UNK</i>     | 0.485869118 | -1.041360358 | 0.000506007 | 0.00628702  | Down |
| T | chr10 | <i>FAM190B</i> | 1.781040628 | 0.832720427  | 0.009120407 | 0.047423206 | Up   |
| T | chr19 | <i>MED16</i>   | 0.180535668 | -2.469644203 | 1.74E-08    | 2.46E-06    | Down |
| T | chr6  | <i>RNGTT</i>   | 1.779934953 | 0.831824519  | 0.00475278  | 0.030026521 | Up   |
| T | chr11 | <i>CTTN</i>    | 3.14828218  | 1.654564855  | 0.000245564 | 0.003729492 | Up   |
| T | chr22 | <i>SMCR7L</i>  | 0.569332599 | -0.812656385 | 0.005135566 | 0.031569414 | Down |
| T | chr2  | <i>FOSL2</i>   | 0.361306494 | -1.468704908 | 0.000825403 | 0.008933793 | Down |
| T | chr9  | <i>ANXA1</i>   | 2.517465181 | 1.331971825  | 0.004188146 | 0.027484181 | Up   |
| T | chr1  | <i>CACNA1E</i> | 0.423816595 | -1.238488016 | 0.007250506 | 0.040388601 | Down |
| T | chr16 | <i>RSPRY1</i>  | 1.766587079 | 0.820964865  | 0.004485063 | 0.028902423 | Up   |
| T | chr9  | <i>PTGS1</i>   | 2.054208418 | 1.038582564  | 0.001759286 | 0.015331757 | Up   |
| T | chr10 | <i>CPEB3</i>   | 0.242228948 | -2.045556806 | 0.002046435 | 0.016961751 | Down |
| T | chr19 | <i>MEGF8</i>   | 0.358095698 | -1.481582906 | 0.003391826 | 0.023918793 | Down |
| T | chr16 | <i>HCFC1R1</i> | 0.334151501 | -1.581425741 | 0.004608798 | 0.029444845 | Down |
| T | chr19 | <i>KCNA7</i>   | 0.079527058 | -3.652410383 | 0.004828306 | 0.030356665 | Down |
| T | chr11 | <i>MUC6</i>    | 0.029159921 | -5.09986936  | 0.003976759 | 0.026562636 | Down |
| T | chr19 | <i>ZNF667</i>  | 3.345957975 | 1.742419325  | 0.001831903 | 0.015743746 | Up   |
| T | chr8  | <i>PRKDC</i>   | 1.937428147 | 0.954142806  | 0.000340794 | 0.004738551 | Up   |

|   |       |                     |             |              |             |             |      |
|---|-------|---------------------|-------------|--------------|-------------|-------------|------|
| T | chr7  | <i>FO XK1</i>       | 0.449071758 | -1.154982102 | 0.007289495 | 0.040519279 | Down |
| T | chr20 | <i>SLCO4A1</i>      | 0.294582007 | -1.76325878  | 0.001220414 | 0.011875007 | Down |
| T | chr13 | <i>MYCBP2</i>       | 1.663968233 | 0.734627891  | 0.001706188 | 0.015054274 | Up   |
| T | chr19 | <i>MED25</i>        | 0.261082236 | -1.937423795 | 4.80E-09    | 8.58E-07    | Down |
| T | chr12 | <i>LMBR1L</i>       | 0.463571577 | -1.109135981 | 0.002210672 | 0.017868913 | Down |
| T | chr22 | <i>FOXRED2</i>      | 0.483093462 | -1.049625767 | 0.002384113 | 0.018782084 | Down |
| T | chr19 | <i>ZNF77</i>        | 2.79978189  | 1.485314442  | 0.006456804 | 0.037321873 | Up   |
| T | chr12 | <i>NDUFA4L2</i>     | 4.384801567 | 2.132511555  | 0.000617699 | 0.007279588 | Up   |
| T | chr2  | <i>LOC100129726</i> | 0           | #NAME?       | 0.002119995 | 0.017394625 | Down |
| T | chr4  | <i>FBXL5</i>        | 1.914671982 | 0.937097253  | 0.002991646 | 0.021850879 | Up   |
| T | chr2  | <i>RSAD2</i>        | 4.791602702 | 2.260508291  | 0.003860863 | 0.026124904 | Up   |
| T | chr2  | <i>SESTD1</i>       | 2.276975614 | 1.187118841  | 0.000481139 | 0.006058824 | Up   |
| T | chr12 | <i>FGD4</i>         | 2.39727448  | 1.261395102  | 0.000239956 | 0.003661371 | Up   |
| T | chr1  | <i>CYB5R1</i>       | 2.325019933 | 1.217243085  | 0.007438172 | 0.041048391 | Up   |
| T | chr10 | <i>KIF5B</i>        | 2.355725227 | 1.236171272  | 5.55E-06    | 0.000238755 | Up   |
| T | chr1  | <i>PFDN2</i>        | 0.438351589 | -1.189839619 | 0.001580702 | 0.014261296 | Down |
| T | chr13 | <i>COG6</i>         | 2.357955853 | 1.237536708  | 0.0054312   | 0.032925391 | Up   |
| T | chr1  | <i>PPAP2B</i>       | 0.242912946 | -2.041488715 | 0.009799711 | 0.049823471 | Down |
| T | chr11 | <i>SF1</i>          | 0.439515133 | -1.186015254 | 0.000520853 | 0.006392337 | Down |
| T | chr7  | <i>POM121</i>       | 0.200237328 | -2.320217148 | 0.000883155 | 0.009397748 | Down |
| T | chr3  | <i>SNORA6</i>       | 0.20062465  | -2.317429218 | 4.89E-08    | 6.07E-06    | Down |
| T | chr22 | <i>TOB2</i>         | 0.44326936  | -1.173744453 | 0.006727036 | 0.03835704  | Down |
| T | chr1  | <i>CMPK1</i>        | 1.703099373 | 0.768162617  | 0.00745067  | 0.041065247 | Up   |
| T | chrX  | <i>MTM1</i>         | 2.027067855 | 1.019394383  | 0.004486234 | 0.028902423 | Up   |
| T | chr5  | <i>SNX2</i>         | 1.734155237 | 0.794233051  | 0.004238403 | 0.027744205 | Up   |
| T | chr20 | <i>NDUFAF5</i>      | 2.429829459 | 1.28085506   | 0.008110062 | 0.043648461 | Up   |
| T | chr1  | <i>ZBTB7B</i>       | 0.318356143 | -1.651286492 | 0.000138846 | 0.002491592 | Down |
| T | chr7  | <i>7-Sep</i>        | 2.376543994 | 1.248865109  | 0.00181261  | 0.015650104 | Up   |
| T | chr16 | <i>COTL1</i>        | 0.370877473 | -1.430985455 | 0.000159874 | 0.002726427 | Down |
| T | chr5  | <i>CREBRF</i>       | 1.91995854  | 0.941075158  | 0.001420625 | 0.01328564  | Up   |
| T | chr11 | <i>SYVN1</i>        | 0.214303284 | -2.22227414  | 3.16E-07    | 2.67E-05    | Down |
| T | chr17 | <i>MED24</i>        | 0.45562507  | -1.134080964 | 7.87E-06    | 0.000307269 | Down |
| T | chr2  | <i>IMMT</i>         | 1.659904588 | 0.731100317  | 0.005812851 | 0.034690969 | Up   |
| T | chr19 | <i>KLHL26</i>       | 0.235536239 | -2.085979051 | 0.003374258 | 0.02383918  | Down |
| T | chr15 | <i>DPP8</i>         | 1.597202919 | 0.675547613  | 0.006923556 | 0.039101608 | Up   |
| T | chrX  | <i>ARMCX2</i>       | 2.013195356 | 1.009487175  | 0.002315158 | 0.01838317  | Up   |
| T | chr19 | <i>OAZ1</i>         | 0.464238528 | -1.107061836 | 1.82E-06    | 0.000104394 | Down |
| T | chr19 | <i>LYL1</i>         | 0.378681056 | -1.400944845 | 6.98E-05    | 0.001523034 | Down |
| T | chr1  | <i>AGTRAP</i>       | 0.209407836 | -2.255612665 | 0.002535159 | 0.019590815 | Down |
| T | chr15 | <i>NTRK3</i>        | 0.020230403 | -5.627331146 | 0.000312062 | 0.004454223 | Down |
| T | chr2  | <i>RANBP2</i>       | 2.065976561 | 1.046823887  | 2.62E-05    | 0.00071892  | Up   |
| T | chr2  | <i>EIF5B</i>        | 1.674434105 | 0.743673602  | 0.005344311 | 0.032549896 | Up   |
| T | chr8  | <i>EBAG9</i>        | 2.908384971 | 1.540218245  | 0.000176154 | 0.002923876 | Up   |
| T | chr12 | <i>ZFC3H1</i>       | 1.71989341  | 0.782319157  | 0.001478218 | 0.013647734 | Up   |

|   |       |                 |             |              |             |             |      |
|---|-------|-----------------|-------------|--------------|-------------|-------------|------|
| T | chr19 | <i>BCKDHA</i>   | 0.471497884 | -1.084676798 | 0.000304831 | 0.004360548 | Down |
| T | chr11 | <i>SORL1</i>    | 0.486831412 | -1.038505836 | 6.28E-05    | 0.001395408 | Down |
| T | chr8  | <i>PLAG1</i>    | 2.985742184 | 1.578089595  | 1.32E-05    | 0.00043963  | Up   |
| T | chr16 | <i>SMG1</i>     | 1.552541618 | 0.634631943  | 0.006962393 | 0.039202148 | Up   |
| T | chr7  | <i>RALA</i>     | 2.385395878 | 1.254228715  | 0.004128883 | 0.027232257 | Up   |
| T | chr10 | <i>ZMIZ1</i>    | 0.348986402 | -1.518757271 | 0.005111203 | 0.031557384 | Down |
| T | chr16 | <i>ZNF646</i>   | 0.62567285  | -0.676519594 | 0.009457535 | 0.048733941 | Down |
| T | chr19 | <i>ZNF93</i>    | Inf         | Inf          | 0.000141594 | 0.002527    | Up   |
| T | chr14 | <i>FRMD6</i>    | 0.457116148 | -1.12936731  | 0.000780412 | 0.008555674 | Down |
| T | chr7  | <i>BAZ1B</i>    | 1.55895122  | 0.640575786  | 0.008154238 | 0.043790678 | Up   |
| T | chr7  | <i>ORAI2</i>    | 0.218592351 | -2.193685177 | 1.61E-08    | 2.34E-06    | Down |
| T | chr14 | <i>PARP2</i>    | 1.905355309 | 0.930060056  | 0.001857006 | 0.015834313 | Up   |
| T | chr5  | <i>ERBB2IP</i>  | 1.944950364 | 0.959733338  | 7.03E-05    | 0.001527663 | Up   |
| T | chr17 | <i>TRAF4</i>    | 0.349765529 | -1.515539981 | 0.000186064 | 0.003045655 | Down |
| T | chr1  | <i>LEPROT</i>   | 0.370487242 | -1.43250423  | 0.000296168 | 0.004283606 | Down |
| T | chr8  | <i>CSMD1</i>    | 0           | #NAME?       | 0.001736602 | 0.015237203 | Down |
| T | chr15 | <i>RPUSD2</i>   | 0.447838098 | -1.158950829 | 0.004135131 | 0.027259689 | Down |
| T | chrX  | <i>KDM6A</i>    | 2.325199828 | 1.217354707  | 2.06E-06    | 0.000114405 | Up   |
| T | chr11 | <i>PRDM11</i>   | 0.538402764 | -0.893242278 | 0.007624851 | 0.04167315  | Down |
| T | chr2  | <i>PAPOLG</i>   | 2.099158496 | 1.069811101  | 0.000118043 | 0.002206283 | Up   |
| T | chr17 | <i>MED31</i>    | Inf         | Inf          | 5.48E-05    | 0.00126917  | Up   |
| T | chr11 | <i>TEAD1</i>    | 0           | #NAME?       | 2.68E-08    | 3.68E-06    | Down |
| T | chr1  | <i>CASQ1</i>    | 0.057482485 | -4.120733751 | 0.003044595 | 0.02211569  | Down |
| T | chr12 | <i>TPCN1</i>    | 0.364492313 | -1.456039708 | 0.000365701 | 0.00498845  | Down |
| T | chr20 | <i>PSMF1</i>    | 0.455838322 | -1.13340588  | 0.000426293 | 0.005583757 | Down |
| T | chr17 | <i>FAM195B</i>  | 0.280198134 | -1.835480749 | 0.000343712 | 0.004769242 | Down |
| T | chr17 | <i>RHBDF2</i>   | 0.183903807 | -2.442976749 | 9.18E-07    | 6.05E-05    | Down |
| T | chr19 | <i>TECR</i>     | 0.535010779 | -0.902360137 | 0.001418159 | 0.013272099 | Down |
| T | chr1  | <i>VANGL2</i>   | 0.316760217 | -1.65853694  | 1.99E-05    | 0.000595991 | Down |
| T | chr14 | <i>SRSF5</i>    | 1.545581859 | 0.628150066  | 0.007580818 | 0.041502038 | Up   |
| T | chr6  | <i>AHI1</i>     | 2.380729554 | 1.251403743  | 0.007308049 | 0.040570555 | Up   |
| T | chr4  | <i>ANXA5</i>    | 1.870051933 | 0.903078335  | 0.004447004 | 0.028806163 | Up   |
| T | chr11 | <i>CD81</i>     | 0.531192117 | -0.912694359 | 0.001377253 | 0.013002562 | Down |
| T | chr11 | <i>CD82</i>     | 0.259760074 | -1.944748392 | 2.00E-05    | 0.000596039 | Down |
| T | chr1  | <i>KIF26B</i>   | 0.119406279 | -3.066049396 | 0.006502838 | 0.037521463 | Down |
| T | chr8  | <i>SHARPIN</i>  | 0.384537547 | -1.378803622 | 0.003955308 | 0.026489195 | Down |
| T | chr17 | <i>RND2</i>     | 0.166610552 | -2.585448322 | 0.009194307 | 0.047708434 | Down |
| T | chr17 | <i>KIAA0195</i> | 0.244682627 | -2.031016425 | 5.61E-09    | 9.76E-07    | Down |
| T | chr9  | <i>RPL12</i>    | 1.942432288 | 0.957864308  | 0.006388489 | 0.037014902 | Up   |
| T | chrX  | <i>ZFX</i>      | 2.125242436 | 1.087627425  | 2.13E-05    | 0.000626505 | Up   |
| T | chr7  | <i>TMEM106B</i> | 2.395103553 | 1.260088033  | 0.000386784 | 0.00520204  | Up   |
| T | chr19 | <i>ZNF699</i>   | 2.539887211 | 1.344764433  | 0.009603181 | 0.04917822  | Up   |
| T | chrX  | <i>DDX3X</i>    | 1.831928503 | 0.873363199  | 0.000216303 | 0.003391695 | Up   |
| T | chr2  | <i>PRKD3</i>    | 1.701814823 | 0.767074064  | 0.002959205 | 0.021688645 | Up   |

|   |       |                  |             |              |             |             |      |
|---|-------|------------------|-------------|--------------|-------------|-------------|------|
| T | chr7  | <i>PRKAR2B</i>   | 1.683986253 | 0.751880362  | 0.00763459  | 0.041691444 | Up   |
| T | chr19 | <i>EMC10</i>     | 0.38649496  | -1.371478495 | 0.00103274  | 0.010517668 | Down |
| T | chr6  | <i>GFOD1</i>     | 0.200909579 | -2.315381742 | 1.08E-06    | 6.81E-05    | Down |
| T | chr7  | <i>MDH2</i>      | 0.31413979  | -1.670521403 | 4.14E-09    | 7.82E-07    | Down |
| T | chr17 | <i>CAMTA2</i>    | 0.361726299 | -1.467029604 | 0.002492368 | 0.019354424 | Down |
| T | chr8  | <i>DLC1</i>      | 0.095525023 | -3.387977491 | 0.000834363 | 0.009003386 | Down |
| T | chrX  | <i>OCLR</i>      | 1.76953471  | 0.823370061  | 0.005430344 | 0.032925391 | Up   |
| T | chr11 | <i>KCNA4</i>     | 0.066003884 | -3.921305268 | 0.001053829 | 0.010690711 | Down |
| T | chr21 | <i>PSMG1</i>     | 5.829170138 | 2.543290511  | 2.08E-05    | 0.00061637  | Up   |
| T | chr8  | <i>GPAA1</i>     | 0.435286007 | -1.199964451 | 0.001338334 | 0.012772426 | Down |
| T | chr12 | <i>KCNA1</i>     | 0.169558696 | -2.560143315 | 0.005722862 | 0.034295113 | Down |
| T | chrX  | <i>Cxorf21</i>   | 2.236086719 | 1.160976139  | 0.002377452 | 0.018752262 | Up   |
| T | chrX  | <i>Cxorf23</i>   | 2.325241206 | 1.21738038   | 0.004598037 | 0.029408674 | Up   |
| T | chr6  | <i>FOXO3</i>     | 0.263045329 | -1.926616665 | 2.62E-07    | 2.29E-05    | Down |
| T | chr12 | <i>KCNA6</i>     | 0.016199956 | -5.947866266 | 2.91E-05    | 0.000777452 | Down |
| T | chr8  | <i>CYHR1</i>     | 0.558624896 | -0.840048223 | 0.00729953  | 0.040540516 | Down |
| T | chr12 | <i>MTERFD3</i>   | 23.31808762 | 4.543377569  | 2.69E-05    | 0.000731415 | Up   |
| T | chr7  | <i>ZNF800</i>    | 1.685249715 | 0.752962381  | 0.002446363 | 0.01908807  | Up   |
| T | chr7  | <i>AGFG2</i>     | 0.319712694 | -1.645152067 | 0.000392766 | 0.005264078 | Down |
| T | chr14 | <i>MED6</i>      | 2.292803678 | 1.197112829  | 0.003060252 | 0.022146029 | Up   |
| T | chr9  | <i>CAAP1</i>     | 2.325916907 | 1.217799558  | 0.005105112 | 0.031549643 | Up   |
| T | chr1  | <i>PIGV</i>      | 0.420269629 | -1.250612893 | 0.005546842 | 0.033470908 | Down |
| T | chr11 | <i>ABTB2</i>     | 0.265947899 | -1.910784453 | 0.002708073 | 0.020469015 | Down |
| T | chr18 | <i>LAMA3</i>     | 0.136547946 | -2.872520485 | 0.000655536 | 0.007574948 | Down |
| T | chr9  | <i>VPS13A</i>    | 2.233861526 | 1.159539758  | 4.24E-06    | 0.000198769 | Up   |
| T | chr15 | <i>FSD2</i>      | 0.111509423 | -3.164762471 | 0.003518219 | 0.024521841 | Down |
| T | chr1  | <i>LRIG2</i>     | 1.826195703 | 0.868841379  | 0.003161479 | 0.022730093 | Up   |
| T | chr8  | <i>RAB11FIP1</i> | 0.260637927 | -1.939881061 | 0.008137514 | 0.043742072 | Down |
| T | chr9  | <i>PSIP1</i>     | 1.836621698 | 0.877054495  | 0.002948115 | 0.021656027 | Up   |
| T | chr1  | <i>SLC27A3</i>   | 0.040460806 | -4.627331146 | 0.009125385 | 0.047430191 | Down |
| T | chr2  | <i>POTEF</i>     | 0.584835549 | -0.773897087 | 0.006473339 | 0.037384323 | Down |
| T | chr2  | <i>KCNK12</i>    | 0.096040957 | -3.380206409 | 8.51E-15    | 9.92E-12    | Down |
| T | chr4  | <i>STIM2</i>     | 1.922090538 | 0.942676294  | 0.005616876 | 0.033862185 | Up   |
| T | chr14 | <i>OXA1L</i>     | 0.386375788 | -1.371923405 | 0.001473868 | 0.013644623 | Down |
| T | chr8  | <i>INTS10</i>    | 1.800868798 | 0.848693077  | 0.004497907 | 0.028963324 | Up   |
| T | chr1  | <i>ADAM15</i>    | 0.296231717 | -1.755201978 | 8.71E-05    | 0.001766851 | Down |
| T | chr2  | <i>VRK2</i>      | 2.600376282 | 1.378720401  | 0.000708835 | 0.008027307 | Up   |
| T | chr22 | <i>TMEM184B</i>  | 0.47871732  | -1.062754091 | 0.006709511 | 0.038290588 | Down |
| T | chr15 | <i>NARG2</i>     | 2.569640492 | 1.361566532  | 0.000287497 | 0.004190704 | Up   |
| T | chr1  | <i>ST7L</i>      | 1.853996038 | 0.890638161  | 0.005102274 | 0.031547045 | Up   |
| T | chr20 | <i>SUMO1P1</i>   | 3.175621738 | 1.667039077  | 0.00014573  | 0.002583135 | Up   |
| T | chr2  | <i>ACTR3</i>     | 1.552605362 | 0.634691176  | 0.007715353 | 0.042009388 | Up   |
| T | chr9  | <i>PTENP1</i>    | 2.038267589 | 1.027343465  | 0.000168206 | 0.002827856 | Up   |
| T | chr6  | <i>FOXP4</i>     | 0.233024533 | -2.101446245 | 0.000515194 | 0.006363919 | Down |

|   |       |           |             |              |             |             |      |
|---|-------|-----------|-------------|--------------|-------------|-------------|------|
| T | chr16 | ZFPM1     | 0.241482923 | -2.050006925 | 6.49E-07    | 4.65E-05    | Down |
| T | chr14 | NFKBIA    | 0.579675183 | -0.786683372 | 0.007405258 | 0.040953367 | Down |
| T | chr5  | LOC644936 | 0.336482841 | -1.57139516  | 9.18E-08    | 1.01E-05    | Down |
| T | chr6  | TBC1D22B  | 0.510810752 | -0.969139202 | 0.005215185 | 0.031987448 | Down |
| T | chr12 | KLHDC5    | 0.46054316  | -1.118591728 | 0.002475322 | 0.019266032 | Down |
| T | chr18 | GALNT1    | 1.707388749 | 0.771791578  | 0.001458555 | 0.01355293  | Up   |
| T | chr10 | MKI67     | 2.031275415 | 1.022385864  | 0.002600183 | 0.019930659 | Up   |
| T | chr19 | VASP      | 0.538511924 | -0.892949805 | 0.001754395 | 0.015318914 | Down |
| T | chr15 | TLN2      | 0.319747963 | -1.644992925 | 0.001886776 | 0.016014885 | Down |
| T | chr6  | ASCC3     | 1.874221559 | 0.90629151   | 0.000284681 | 0.004165685 | Up   |
| T | chr17 | SENP3     | 7.01184512  | 2.80979413   | 0.001562201 | 0.014143284 | Up   |
| T | chr2  | HES6      | 0.211777577 | -2.239378248 | 0.003907473 | 0.02630387  | Down |
| T | chr22 | CARD10    | 0.04367421  | -4.517074593 | 1.66E-07    | 1.61E-05    | Down |
| T | chr7  | CROT      | 1.913595368 | 0.936285803  | 0.003211936 | 0.022998306 | Up   |
| T | chr18 | OSBPL1A   | 2.332108386 | 1.22163484   | 5.98E-06    | 0.000249913 | Up   |
| T | chr5  | KIAA0141  | 0.491067401 | -1.026007041 | 0.003148902 | 0.022671402 | Down |
| T | chr1  | GMEB1     | 0.504381087 | -0.987413916 | 0.00126889  | 0.012234986 | Down |
| T | chr12 | MBD6      | 0.257272472 | -1.958630997 | 1.80E-05    | 0.000555925 | Down |
| T | chr11 | RPLPOP2   | 0.094378293 | -3.405401106 | 6.11E-12    | 2.85E-09    | Down |
| T | chr12 | SP7       | 0           | #NAME?       | 0.00110311  | 0.011061627 | Down |
| T | chr17 | PLXDC1    | 0           | #NAME?       | 0.000424501 | 0.005571469 | Down |
| T | chr17 | TOM1L2    | 2.621591694 | 1.390443007  | 0.006619956 | 0.037961503 | Up   |
| T | chr19 | SPHK2     | 0.388395171 | -1.364402832 | 0.008194662 | 0.043922581 | Down |
| T | chr12 | SCARNA11  | 0.238500592 | -2.067935246 | 3.65E-06    | 0.000175059 | Down |
| T | chr12 | SOX5      | 0.271586972 | -1.880513822 | 0.001341574 | 0.012793985 | Down |
| T | chr11 | KCNC1     | 0           | #NAME?       | 4.53E-05    | 0.00109609  | Down |
| T | chr2  | CHN1      | 0.118010683 | -3.08301063  | 0.004584574 | 0.029361977 | Down |
| T | chr11 | TRAF6     | 1.969615362 | 0.977913919  | 0.007842512 | 0.04252428  | Up   |
| T | chr1  | NCDN      | 0.35921702  | -1.477072385 | 3.42E-07    | 2.83E-05    | Down |
| T | chr15 | UBE2Q2    | 2.412806795 | 1.270712397  | 2.33E-05    | 0.000666535 | Up   |
| T | chr17 | SRP68     | 0.546199053 | -0.872501283 | 0.000804444 | 0.008767564 | Down |
| T | chr19 | PALM      | 0.177191246 | -2.496620764 | 0.000113163 | 0.002145823 | Down |
| T | chr11 | ARHGEF12  | 1.866192108 | 0.900097506  | 0.004395392 | 0.028571146 | Up   |
| T | chr2  | FASTKD2   | 7.383896922 | 2.884382413  | 0.000650239 | 0.007547164 | Up   |
| T | chr14 | SRP54     | 2.050908333 | 1.036263011  | 2.68E-05    | 0.000731415 | Up   |
| T | chr12 | EP400NL   | Inf         | Inf          | 0.001158168 | 0.011472639 | Up   |
| T | chr3  | SMC4      | 2.265815411 | 1.180030334  | 6.78E-06    | 0.000276502 | Up   |
| T | chr2  | DNPEP     | 0.548966949 | -0.865208801 | 0.00454178  | 0.029216992 | Down |
| T | chr16 | USP7      | 1.549799897 | 0.632081953  | 0.008499352 | 0.045160449 | Up   |
| T | chr7  | MPLKIP    | 2.097894512 | 1.068942137  | 0.003918719 | 0.026365237 | Up   |
| T | chr19 | DUS3L     | 0.303913397 | -1.718267821 | 0.00020243  | 0.003224546 | Down |
| T | chr11 | FADS3     | 0.402377397 | -1.313378829 | 0.005540767 | 0.033449722 | Down |
| T | chrX  | ZNF711    | 16.41181581 | 4.036662963  | 0.001344109 | 0.0128088   | Up   |
| T | chr11 | ZFPL1     | 0.398891774 | -1.325930724 | 0.002017501 | 0.016794444 | Down |

|   |       |                 |             |              |             |             |      |
|---|-------|-----------------|-------------|--------------|-------------|-------------|------|
| T | chr11 | <i>GPR137</i>   | 0.362692971 | -1.463179307 | 0.000273491 | 0.004017982 | Down |
| T | chr4  | <i>ZNF330</i>   | 2.195721705 | 1.134695213  | 0.002803115 | 0.02093271  | Up   |
| T | chr2  | <i>PREB</i>     | 0.529111021 | -0.918357626 | 0.001246632 | 0.012082882 | Down |
| T | chr1  | <i>MRPL37</i>   | 0.343879674 | -1.54002425  | 0.002977289 | 0.021796699 | Down |
| T | chr3  | <i>SLC9A9</i>   | 0.478148463 | -1.064469456 | 0.000487661 | 0.006117336 | Down |
| T | chr1  | <i>PEAR1</i>    | 0.342679375 | -1.545068732 | 0.000705354 | 0.008001787 | Down |
| T | chr7  | <i>PNPLA8</i>   | 3.395423544 | 1.763591547  | 1.98E-07    | 1.84E-05    | Up   |
| T | chr6  | <i>ZUFSP</i>    | 1.878155228 | 0.909316306  | 0.001894242 | 0.016067806 | Up   |
| T | chr22 | <i>PRODH</i>    | 2.81941418  | 1.49539543   | 0.00512667  | 0.031569414 | Up   |
| T | chr9  | <i>NOL6</i>     | 0.523863725 | -0.932736528 | 0.004090255 | 0.027032154 | Down |
| T | chr2  | <i>CCT4</i>     | 1.707978573 | 0.772289876  | 0.007484344 | 0.041092665 | Up   |
| T | chr9  | <i>NOL8</i>     | 2.589576481 | 1.372716168  | 0.003829358 | 0.026006143 | Up   |
| T | chr3  | <i>RPL24</i>    | 2.276046716 | 1.186530169  | 4.46E-05    | 0.001085791 | Up   |
| T | chr3  | <i>RPL29</i>    | 0.153794356 | -2.700925539 | 0.008984462 | 0.046865769 | Down |
| T | chr16 | <i>DUS2L</i>    | 0.368755566 | -1.43926327  | 0.001061149 | 0.010756601 | Down |
| T | chr22 | <i>LDOC1L</i>   | 0.166176311 | -2.589213362 | 0.002605666 | 0.019950998 | Down |
| T | chr17 | <i>TRIM25</i>   | 0.328108495 | -1.607755146 | 2.71E-05    | 0.000735821 | Down |
| T | chr1  | <i>SEMA4A</i>   | 0.42361932  | -1.239159708 | 0.008100479 | 0.043614878 | Down |
| T | chr20 | <i>DPM1</i>     | 1.896138533 | 0.923064372  | 0.008818337 | 0.046386227 | Up   |
| T | chr10 | <i>MTRNR2L5</i> | 0.25255155  | -1.985350198 | 9.13E-15    | 9.92E-12    | Down |
| T | chr17 | <i>ANAPC11</i>  | 0.417580763 | -1.259872841 | 0.001615938 | 0.014469137 | Down |
| T | chrX  | <i>CHM</i>      | 2.488736335 | 1.315413395  | 0.005210437 | 0.031973358 | Up   |
| T | chr4  | <i>PDE5A</i>    | 3.034728231 | 1.601567325  | 0.000725989 | 0.008136813 | Up   |
| T | chr3  | <i>KBTBD12</i>  | Inf         | Inf          | 0.004325965 | 0.028246516 | Up   |
| T | chrX  | <i>MAGT1</i>    | 2.05107932  | 1.036383286  | 0.001265208 | 0.012208504 | Up   |
| T | chr19 | <i>WIZ</i>      | 0.251119797 | -1.993552328 | 0.002391327 | 0.018804941 | Down |
| T | chr7  | <i>RAPGEF5</i>  | 3.169072907 | 1.664060851  | 0.004994784 | 0.031036294 | Up   |
| T | chr4  | <i>TMEM128</i>  | 5.578559381 | 2.479892606  | 3.40E-05    | 0.00087853  | Up   |
| T | chr16 | <i>TUBB3</i>    | 0.569808092 | -0.811451986 | 0.00040253  | 0.005364047 | Down |
| T | chr11 | <i>FAU</i>      | 0.533821031 | -0.905571951 | 0.000103014 | 0.00200885  | Down |
| T | chr17 | <i>CPD</i>      | 1.672392728 | 0.741913675  | 0.009277213 | 0.048027986 | Up   |
| T | chr1  | <i>ADAMTSL4</i> | 0.047204273 | -4.404938725 | 0.000847393 | 0.009083882 | Down |
| T | chr17 | <i>RABEP1</i>   | 1.818567252 | 0.862802279  | 0.002021817 | 0.016811103 | Up   |
| T | chr6  | <i>SNORA29</i>  | 0.303930382 | -1.718187196 | 1.58E-05    | 0.000497495 | Down |
| T | chr4  | <i>NEK1</i>     | 1.947282699 | 0.961462344  | 0.00228985  | 0.018259071 | Up   |
| T | chr5  | <i>RHOBTB3</i>  | 3.384199036 | 1.758814421  | 4.75E-07    | 3.65E-05    | Up   |
| T | chr7  | <i>SAMD9L</i>   | 4.034936565 | 2.012545992  | 8.62E-11    | 2.74E-08    | Up   |
| T | chr18 | <i>TRAPPC8</i>  | 1.683819402 | 0.75173741   | 0.00358679  | 0.024837185 | Up   |
| T | chr1  | <i>ZZZ3</i>     | 2.005396278 | 1.00388735   | 0.000105118 | 0.002034676 | Up   |
| T | chr5  | <i>IGIP</i>     | 1.713149382 | 0.776650956  | 0.00785093  | 0.042542302 | Up   |
| T | chr16 | <i>MAZ</i>      | 0.29962342  | -1.738777697 | 7.34E-14    | 6.38E-11    | Down |
| T | chr7  | <i>ZNF394</i>   | 9.605288952 | 3.263829015  | 0.001215671 | 0.011844395 | Up   |
| T | chr9  | <i>FBXW5</i>    | 0.455057181 | -1.135880253 | 0.000341062 | 0.004738551 | Down |
| T | chr9  | <i>RNF20</i>    | 1.677883095 | 0.746642201  | 0.004700799 | 0.029842641 | Up   |

|   |       |           |             |              |             |             |      |
|---|-------|-----------|-------------|--------------|-------------|-------------|------|
| T | chr17 | SCARNA16  | 0.288249784 | -1.794608569 | 0.000986231 | 0.010171693 | Down |
| T | chr19 | ZBTB7A    | 0.31851164  | -1.650581999 | 3.91E-06    | 0.000185312 | Down |
| T | chr6  | RGL2      | 0.54847677  | -0.866497576 | 0.001527502 | 0.013935517 | Down |
| T | chr5  | TNIP1     | 0.521713896 | -0.938669235 | 0.003599342 | 0.02488448  | Down |
| T | chr16 | CDH8      | 5.354244705 | 2.420683076  | 7.94E-06    | 0.000307269 | Up   |
| T | chr7  | LOC407835 | 0.441306991 | -1.180145491 | 0.001712727 | 0.015087478 | Down |
| T | chr3  | PIK3CA    | 1.842754792 | 0.88186411   | 0.000701624 | 0.007980915 | Up   |
| T | chr19 | DHX34     | 0.356191993 | -1.489273009 | 0.000188253 | 0.00307378  | Down |
| T | chr9  | GCNT1     | 3.623071287 | 1.857213192  | 2.53E-05    | 0.000705728 | Up   |
| T | chr2  | FKBP7     | Inf         | Inf          | 0.000472481 | 0.006001933 | Up   |
| T | chr12 | USP15     | 1.589830933 | 0.668873353  | 0.006012547 | 0.035589694 | Up   |
| T | chr1  | SEMA6C    | 0.297126934 | -1.750848707 | 0.008205567 | 0.043962969 | Down |
| T | chr14 | OSGEP     | 3.251581586 | 1.701141623  | 0.001263456 | 0.012200628 | Up   |
| T | chr8  | GEM       | 0.390287071 | -1.357392425 | 0.000403701 | 0.005374173 | Down |
| T | chrX  | XIST      | 67.38118069 | 6.074273803  | 0.000158597 | 0.002711742 | Up   |
| T | chr20 | PLK1S1    | 2.654415054 | 1.408393973  | 0.000265221 | 0.003931905 | Up   |
| T | chr10 | ACADSB    | 3.67388771  | 1.877307532  | 0.001949628 | 0.016370469 | Up   |
| T | chr21 | GABPA     | 2.462073619 | 1.299873901  | 0.000464207 | 0.0059141   | Up   |
| T | chr2  | EIF2AK2   | 3.302240093 | 1.723445017  | 0.001261998 | 0.012200628 | Up   |
| T | chr15 | DMXL2     | 2.892379963 | 1.532257087  | 0.000363069 | 0.004970198 | Up   |
| T | chr7  | SH2B2     | 0.287213056 | -1.799806765 | 0.008599233 | 0.04558537  | Down |
| T | chr2  | TLK1      | 1.836128427 | 0.876666971  | 0.001762803 | 0.015346545 | Up   |
| T | chr17 | CCL4      | 0.07080641  | -3.819976224 | 0.003974418 | 0.026562636 | Down |
| T | chr11 | ARAP1     | 0.441234034 | -1.18038402  | 0.001968084 | 0.016490442 | Down |
| T | chr2  | KCNIP3    | 15.53701817 | 3.957637747  | 0.001667441 | 0.014798257 | Up   |
| T | chr2  | HPCAL1    | 0.469957495 | -1.089397815 | 0.003611863 | 0.024918224 | Down |
| T | chr16 | DHX38     | 0.600559402 | -0.735621144 | 0.004409873 | 0.028627803 | Down |
| T | chr16 | ST3GAL2   | 0.476374042 | -1.069833293 | 0.004950852 | 0.030874193 | Down |
| T | chr17 | CCDC43    | 3.377795633 | 1.756082043  | 0.001866151 | 0.015891517 | Up   |
| T | chr17 | MYBBP1A   | 0.522847393 | -0.935538176 | 0.001004268 | 0.010275831 | Down |
| T | chr17 | CCDC47    | 1.735465088 | 0.795322343  | 0.003250537 | 0.023233967 | Up   |
| T | chr11 | LMO1      | 0.306684074 | -1.705174845 | 0.001634204 | 0.014592621 | Down |
| T | chr7  | KDELRL2   | 0.487352288 | -1.036963077 | 0.000442211 | 0.005723298 | Down |
| T | chr19 | GLTSCR1   | 0.12637953  | -2.984165292 | 1.43E-09    | 3.17E-07    | Down |
| T | chr15 | SLC28A2   | 1.799362423 | 0.8474858    | 0.007468879 | 0.041092665 | Up   |
| T | chr17 | KSR1      | 0.391845613 | -1.351642752 | 0.003939157 | 0.02645508  | Down |
| T | chr4  | FBXW7     | 1.857111885 | 0.893060736  | 0.001462775 | 0.013577326 | Up   |
| T | chr17 | BRCA1     | 3.036366227 | 1.60234581   | 0.000260129 | 0.003891791 | Up   |
| T | chr1  | KIAA2013  | 0.360265848 | -1.472866198 | 0.001100194 | 0.011040869 | Down |
| T | chr2  | SPOPL     | 1.790255475 | 0.840165479  | 0.006240104 | 0.036522386 | Up   |
| T | chr1  | HLX       | 0.121015758 | -3.04673317  | 1.44E-06    | 8.66E-05    | Down |
| T | chr11 | AIP       | 0.505283453 | -0.984835159 | 0.001823946 | 0.015706402 | Down |
| T | chr19 | HIF3A     | 0.149226172 | -2.744427506 | 0.00054135  | 0.006575837 | Down |
| T | chr10 | MAP3K8    | 2.721718462 | 1.44451784   | 0.003989384 | 0.02660813  | Up   |

|   |       |                 |             |              |             |             |      |
|---|-------|-----------------|-------------|--------------|-------------|-------------|------|
| T | chr10 | <i>ARHGAP12</i> | 2.783868185 | 1.477090902  | 1.24E-05    | 0.000423021 | Up   |
| T | chr8  | <i>TMED10P1</i> | 0.11715381  | -3.093524227 | 3.04E-06    | 0.000150694 | Down |
| T | chr12 | <i>RAPGEF3</i>  | 0.204696478 | -2.288441817 | 6.93E-05    | 0.001513938 | Down |
| T | chr17 | <i>HOXB9</i>    | 0           | #NAME?       | 4.88E-05    | 0.00115634  | Down |
| T | chr4  | <i>RASGEF1B</i> | 5.973154323 | 2.578492996  | 0.000345901 | 0.004785391 | Up   |
| T | chr2  | <i>LRP1B</i>    | 0           | #NAME?       | 3.37E-06    | 0.000164473 | Down |
| T | chr11 | <i>NPAT</i>     | 1.725479387 | 0.786997239  | 0.009687239 | 0.049463689 | Up   |
| T | chr11 | <i>SNORA23</i>  | 0.228950603 | -2.126891733 | 5.45E-13    | 3.95E-10    | Down |
| T | chr2  | <i>CTDSP1</i>   | 0.321945613 | -1.635111103 | 9.41E-08    | 1.02E-05    | Down |
| T | chr10 | <i>ADO</i>      | 0.262806492 | -1.92792718  | 0.000619767 | 0.007297361 | Down |
| T | chr3  | <i>APEH</i>     | 0.467257971 | -1.09770882  | 7.58E-05    | 0.001605345 | Down |
| T | chrX  | <i>ATP11C</i>   | 1.811303739 | 0.857028494  | 0.000738251 | 0.008231814 | Up   |
| T | chr14 | <i>HIF1A</i>    | 1.698231577 | 0.764033203  | 0.004471662 | 0.028841639 | Up   |
| T | chr3  | <i>TOPBP1</i>   | 2.564647316 | 1.358760444  | 3.78E-07    | 3.10E-05    | Up   |
| T | chr19 | <i>MARK4</i>    | 0.329003115 | -1.603826851 | 0.008958555 | 0.046772002 | Down |
| T | chr6  | <i>VAR5</i>     | 0.603153997 | -0.729401696 | 0.00191649  | 0.016161955 | Down |
| T | chr4  | <i>SMARCA5</i>  | 2.012489686 | 1.008981389  | 0.002299268 | 0.018312731 | Up   |
| T | chr2  | <i>NRXN1</i>    | 2.029618482 | 1.021208562  | 8.67E-05    | 0.001764576 | Up   |
| T | chr12 | <i>ATP2B1</i>   | 1.585226702 | 0.664689174  | 0.009470892 | 0.048759769 | Up   |
| T | chr7  | <i>HBP1</i>     | 1.699222542 | 0.76487481   | 0.002223374 | 0.017938243 | Up   |
| T | chr20 | <i>PTPRT</i>    | 0.072899803 | -3.777941265 | 0.009519966 | 0.048954466 | Down |
| T | chr20 | <i>GPCPD1</i>   | 2.718344281 | 1.442728187  | 0.000232951 | 0.003588051 | Up   |
| T | chr16 | <i>FBXL16</i>   | 0.036449902 | -4.777941265 | 0.007270856 | 0.0404329   | Down |
| T | chr3  | <i>DCUN1D1</i>  | 1.846595339 | 0.884867751  | 0.000533603 | 0.006499892 | Up   |
| T | chr11 | <i>TCIRG1</i>   | 0.541897653 | -0.883907695 | 0.003592381 | 0.024857201 | Down |
| T | chr16 | <i>FBXL19</i>   | 0.377993207 | -1.403567787 | 2.93E-06    | 0.000146107 | Down |
| T | chr10 | <i>SLK</i>      | 1.806025302 | 0.852818105  | 0.000725739 | 0.008136813 | Up   |
| T | chr14 | <i>SERPINA1</i> | 0           | #NAME?       | 8.68E-05    | 0.001764576 | Down |
| T | chr5  | <i>TAF7</i>     | 2.44366609  | 1.289047165  | 0.00015495  | 0.002676196 | Up   |
| T | chr1  | <i>SWT1</i>     | 3.525138538 | 1.817679957  | 4.91E-06    | 0.000220827 | Up   |
| T | chrX  | <i>DIAPH2</i>   | 2.392080979 | 1.25826623   | 0.00050078  | 0.006239895 | Up   |
| T | chr5  | <i>RASA1</i>    | 1.721858636 | 0.783966703  | 0.001584897 | 0.014279399 | Up   |
| T | chr5  | <i>DNAJC21</i>  | 2.272094559 | 1.184022878  | 0.006530205 | 0.037596228 | Up   |
| T | chr1  | <i>CACYBP</i>   | 2.727082502 | 1.447358347  | 0.002274108 | 0.018207089 | Up   |
| T | chr17 | <i>ATP1B2</i>   | 0.114592812 | -3.125411547 | 1.57E-07    | 1.55E-05    | Down |
| T | chr20 | <i>PCIF1</i>    | 0.41139064  | -1.281419125 | 4.75E-07    | 3.65E-05    | Down |
| T | chr6  | <i>HIST1H1B</i> | 0.642516761 | -0.638194005 | 0.009281683 | 0.048032063 | Down |
| T | chr5  | <i>TTC37</i>    | 2.219098477 | 1.149973692  | 6.07E-05    | 0.001360885 | Up   |
| T | chr6  | <i>HIST1H1E</i> | 0.626763827 | -0.674006177 | 0.002580095 | 0.019818147 | Down |
| T | chr22 | <i>RHBDD3</i>   | 0.095804142 | -3.383768157 | 3.34E-05    | 0.000865632 | Down |
| T | chr4  | <i>RNF4</i>     | 1.657783975 | 0.729256022  | 0.008181012 | 0.043871687 | Up   |
| T | chr2  | <i>TCF7L1</i>   | 0.049980995 | -4.322476565 | 0.000165465 | 0.00279982  | Down |
| T | chr13 | <i>BRCA2</i>    | 5.498059999 | 2.458922651  | 5.43E-07    | 4.03E-05    | Up   |
| T | chr7  | <i>GCK</i>      | 0.026509019 | -5.237372883 | 0.00064788  | 0.007526482 | Down |

|   |       |                 |             |              |             |             |      |
|---|-------|-----------------|-------------|--------------|-------------|-------------|------|
| T | chr12 | <i>DHX37</i>    | 0.316278514 | -1.660732541 | 0.00021523  | 0.003378929 | Down |
| T | chr5  | <i>MATR3</i>    | 1.843887277 | 0.882750462  | 0.000954938 | 0.009926788 | Up   |
| T | chr5  | <i>SKP1</i>     | 1.660890265 | 0.731956758  | 0.004203766 | 0.02755896  | Up   |
| T | chr1  | <i>ELTD1</i>    | 1.716526889 | 0.779492457  | 0.00137652  | 0.013002562 | Up   |
| T | chr4  | <i>CENPC1</i>   | Inf         | Inf          | 0.003951639 | 0.026489195 | Up   |
| T | chr22 | <i>DESI1</i>    | 0.280621561 | -1.833302235 | 1.78E-08    | 2.50E-06    | Down |
| T | chr1  | <i>ZNF362</i>   | 0.282554054 | -1.823401205 | 0.00011305  | 0.002145823 | Down |
| T | chrX  | <i>PHF6</i>     | 1.578281663 | 0.658354695  | 0.009119156 | 0.047423206 | Up   |
| T | chr19 | <i>MIR27A</i>   | 0.084967692 | -3.556941818 | 0.008089785 | 0.043575283 | Down |
| T | chr9  | <i>SH2D3C</i>   | 0.294116809 | -1.765538859 | 0.00014702  | 0.002593933 | Down |
| T | chr17 | <i>MMD</i>      | 0.48080802  | -1.056467134 | 0.005820716 | 0.034706153 | Down |
| T | chr2  | <i>EPC2</i>     | 1.96868868  | 0.977234987  | 9.35E-05    | 0.001868295 | Up   |
| T | chr19 | <i>TBC1D17</i>  | 0.349463152 | -1.516787752 | 9.83E-05    | 0.001943454 | Down |
| T | chr2  | <i>TXNDC9</i>   | 1.928004932 | 0.947108742  | 0.00861979  | 0.045657237 | Up   |
| T | chr16 | <i>DCTN5</i>    | 2.01948137  | 1.013984837  | 0.002713446 | 0.020492965 | Up   |
| T | chr17 | <i>ALKBH5</i>   | 0.479830336 | -1.059403723 | 0.000317978 | 0.004523602 | Down |
| T | chr16 | <i>PIGQ</i>     | 0.186555753 | -2.422321247 | 1.02E-07    | 1.09E-05    | Down |
| T | chr16 | <i>PDXDC1</i>   | 2.253781005 | 1.172347339  | 0.00056885  | 0.00682095  | Up   |
| T | chr15 | <i>LYSMD2</i>   | 5.567805009 | 2.477108687  | 0.007669686 | 0.041830568 | Up   |
| T | chr14 | <i>MTA1</i>     | 0.527918039 | -0.92161413  | 0.000135413 | 0.002446812 | Down |
| T | chr19 | <i>SIRT2</i>    | 0.258861606 | -1.949747093 | 0.000164584 | 0.00279215  | Down |
| T | chr3  | <i>CHST2</i>    | 0.084967692 | -3.556941818 | 0.00743523  | 0.041048391 | Down |
| T | chr7  | <i>GNB2</i>     | 0.389393928 | -1.360697706 | 7.06E-09    | 1.20E-06    | Down |
| T | chr2  | <i>TTC30A</i>   | 5.862195415 | 2.551441061  | 0.008845959 | 0.046459091 | Up   |
| T | chr20 | <i>TPD52L2</i>  | 1.87288727  | 0.905264066  | 0.008181804 | 0.043871687 | Up   |
| T | chr6  | <i>VPS52</i>    | 0.399644508 | -1.323210832 | 2.34E-05    | 0.000668336 | Down |
| T | chr4  | <i>DAPP1</i>    | 1.599157482 | 0.67731202   | 0.007421835 | 0.040992912 | Up   |
| T | chr13 | <i>KIAA1704</i> | 2.020554237 | 1.014751078  | 0.003934419 | 0.02644432  | Up   |
| T | chr11 | <i>TSPAN4</i>   | 0.539662856 | -0.889869703 | 0.007002732 | 0.039327438 | Down |
| T | chr6  | <i>TRMT11</i>   | 2.403871208 | 1.265359603  | 0.000920209 | 0.009650359 | Up   |
| T | chrX  | <i>IGBP1</i>    | 2.089891575 | 1.063428096  | 0.003757395 | 0.025637539 | Up   |
| T | chr19 | <i>MBD3</i>     | 0.309465967 | -1.692147334 | 4.19E-06    | 0.000197305 | Down |
| T | chr20 | <i>RBM38</i>    | 0.42043339  | -1.250050844 | 0.001062634 | 0.010763295 | Down |
| T | chr20 | <i>RBM39</i>    | 2.21445991  | 1.146954879  | 0.000156689 | 0.002693227 | Up   |
| T | chr7  | <i>SLC12A9</i>  | 0.354677591 | -1.495419911 | 0.007298155 | 0.040540516 | Down |
| T | chr4  | <i>TMEM192</i>  | 0.299271902 | -1.740471262 | 0.004550729 | 0.029222031 | Down |
| T | chr20 | <i>GGT7</i>     | 0.057482485 | -4.120733751 | 0.007443651 | 0.041061255 | Down |
| T | chr22 | <i>GGA1</i>     | 0.451723722 | -1.146487418 | 0.00026433  | 0.003925002 | Down |
| T | chr1  | <i>HNRNPR</i>   | 1.956074142 | 0.967961055  | 0.000624565 | 0.007326292 | Up   |
| T | chr12 | <i>ERGIC2</i>   | 2.54193653  | 1.345928008  | 0.000372055 | 0.005045554 | Up   |
| T | chr17 | <i>MNT</i>      | 0.422233948 | -1.243885519 | 2.11E-05    | 0.000621076 | Down |
| T | chr1  | <i>LDLRAP1</i>  | 0.351164266 | -1.50978205  | 1.26E-05    | 0.000426824 | Down |
| T | chr6  | <i>HIST1H3A</i> | 0.221521704 | -2.174480039 | 1.21E-11    | 4.67E-09    | Down |
| T | chr8  | <i>RUNX1T1</i>  | 0.293020104 | -1.770928446 | 0.000373187 | 0.005055663 | Down |

|   |       |                 |             |              |             |             |      |
|---|-------|-----------------|-------------|--------------|-------------|-------------|------|
| T | chr11 | <i>SNORA57</i>  | 0.208998011 | -2.258438882 | 8.39E-07    | 5.70E-05    | Down |
| T | chr6  | <i>HIST1H3C</i> | 0.079402936 | -3.65466384  | 1.85E-12    | 1.10E-09    | Down |
| T | chr6  | <i>HIST1H3D</i> | 0.221398095 | -2.175285287 | 1.88E-11    | 7.01E-09    | Down |
| T | chr6  | <i>HIST1H3E</i> | 0.047204273 | -4.404938725 | 8.76E-06    | 0.000329439 | Down |
| T | chr6  | <i>HIST1H3F</i> | 0.144765037 | -2.788214883 | 1.69E-12    | 1.05E-09    | Down |
| T | chr3  | <i>STAG1</i>    | 2.103094744 | 1.072513845  | 1.07E-05    | 0.000376935 | Up   |
| T | chr6  | <i>HIST1H3G</i> | 0.281869379 | -1.826901338 | 0.000825859 | 0.008933793 | Down |
| T | chr6  | <i>HIST1H3H</i> | 0.153544211 | -2.703273978 | 2.11E-21    | 1.38E-17    | Down |
| T | chr6  | <i>HIST1H3I</i> | 0.077201552 | -3.695226339 | 0.001234676 | 0.011984812 | Down |
| T | chr6  | <i>HIST1H3J</i> | 0.229451451 | -2.123739164 | 0.008761142 | 0.046199618 | Down |
| T | chr6  | <i>ATAT1</i>    | 0.302759391 | -1.723756384 | 3.29E-05    | 0.000855333 | Down |
| T | chr7  | <i>MIOS</i>     | 1.831572864 | 0.873083096  | 0.002444192 | 0.019082545 | Up   |
| T | chr19 | <i>ZNF317</i>   | 3.91419691  | 1.968716335  | 0.000148633 | 0.002609782 | Up   |
| T | chr17 | <i>SLC16A11</i> | 0.123847587 | -3.013362337 | 1.82E-05    | 0.000560095 | Down |
| T | chr15 | <i>KIAA0101</i> | 2.020005355 | 1.014359117  | 0.003051783 | 0.022130939 | Up   |
| T | chr19 | <i>SPINT2</i>   | 0.133288441 | -2.907376417 | 0.001495652 | 0.013741559 | Down |
| T | chr1  | <i>SH2D5</i>    | 0.310803253 | -1.685926493 | 9.79E-06    | 0.000354916 | Down |
| T | chr5  | <i>HOMER1</i>   | 2.645310799 | 1.403437235  | 0.007447413 | 0.041064647 | Up   |
| T | chr11 | <i>NCAPD3</i>   | 2.3579148   | 1.23751159   | 5.82E-05    | 0.001331798 | Up   |
| T | chr3  | <i>NAT6</i>     | 0.353011707 | -1.502212065 | 0.000645115 | 0.007507738 | Down |
| T | chr16 | <i>GNAO1</i>    | 0.177191246 | -2.496620764 | 0.000304479 | 0.004360303 | Down |
| T | chr3  | <i>KLF15</i>    | 0.031469515 | -4.989901226 | 0.003493539 | 0.024463578 | Down |
| T | chr11 | <i>TRPC6</i>    | 4.913614902 | 2.296784793  | 0.000114795 | 0.002164191 | Up   |
| T | chr6  | <i>HLA-DQB1</i> | 0.373176901 | -1.422068406 | 0.007772606 | 0.042250589 | Down |
| T | chr11 | <i>RELA</i>     | 0.469594788 | -1.0905117   | 0.000184262 | 0.003027322 | Down |
| T | chr12 | <i>MLF2</i>     | 0.594097249 | -0.751228987 | 0.009608714 | 0.04917822  | Down |
| T | chr6  | <i>HIST1H4A</i> | 0.202053115 | -2.307193499 | 1.08E-09    | 2.55E-07    | Down |
| T | chr6  | <i>HIST1H4B</i> | 0.165704667 | -2.593313858 | 4.66E-13    | 3.58E-10    | Down |
| T | chr6  | <i>HIST1H4C</i> | 0.175408328 | -2.51121085  | 0.00506951  | 0.031374206 | Down |
| T | chr11 | <i>MARK2</i>    | 0.420084802 | -1.251247502 | 0.006817607 | 0.038704306 | Down |
| T | chr6  | <i>HIST1H4F</i> | 0.432906813 | -1.207871588 | 0.004281356 | 0.027975741 | Down |
| T | chr16 | <i>TMCS</i>     | 0           | #NAME?       | 0.000481052 | 0.006058824 | Down |
| T | chr6  | <i>ZNF292</i>   | 2.157178666 | 1.109145671  | 7.38E-06    | 0.000293489 | Up   |
| T | chr6  | <i>HIST1H4H</i> | 0.182771944 | -2.451883462 | 0.000142906 | 0.002543453 | Down |
| T | chr6  | <i>HIST1H4I</i> | 0.230639162 | -2.116290595 | 4.14E-08    | 5.30E-06    | Down |
| T | chr20 | <i>MTRNR2L3</i> | 0.45160209  | -1.146875932 | 0.001298951 | 0.01249594  | Down |
| T | chr2  | <i>PMS1</i>     | 8.633886456 | 3.11001012   | 5.08E-09    | 8.96E-07    | Up   |
| T | chr11 | <i>LRP5</i>     | 0.387627903 | -1.36725567  | 0.000387539 | 0.005206835 | Down |
| T | chr10 | <i>SLC29A3</i>  | 0.327199892 | -1.611755824 | 0.006707624 | 0.038290588 | Down |
| T | chr2  | <i>VP54</i>     | 2.044167722 | 1.031513573  | 6.01E-05    | 0.00135951  | Up   |
| T | chrX  | <i>RPS6KA3</i>  | 2.02888539  | 1.020687371  | 4.41E-05    | 0.001078195 | Up   |
| T | chr17 | <i>CCR7</i>     | 0.209788453 | -2.252992821 | 0.00174026  | 0.015237203 | Down |
| T | chr19 | <i>ZNF320</i>   | 3.772811444 | 1.91564      | 0.002879991 | 0.021347937 | Up   |
| T | chr9  | <i>ZNF782</i>   | 13.56281228 | 3.76158445   | 0.003872314 | 0.026175604 | Up   |

|   |       |                 |             |              |             |             |      |
|---|-------|-----------------|-------------|--------------|-------------|-------------|------|
| T | chr12 | <i>NCKAP5L</i>  | 0.181583901 | -2.461291797 | 2.96E-05    | 0.000783763 | Down |
| T | chr10 | <i>GHITM</i>    | 2.09791139  | 1.068953744  | 0.00012318  | 0.002279439 | Up   |
| T | chr19 | <i>PKN1</i>     | 0.591589147 | -0.757332508 | 0.003357734 | 0.023770194 | Down |
| T | chr7  | <i>POLD2</i>    | 0.499792562 | -1.000598665 | 0.00069907  | 0.007972087 | Down |
| T | chr12 | <i>NEDD1</i>    | 1.835175288 | 0.875917869  | 0.008332492 | 0.044496803 | Up   |
| T | chr1  | <i>CRTC2</i>    | 0.294726606 | -1.762550792 | 0.001388378 | 0.013077821 | Down |
| T | chr4  | <i>LIMCH1</i>   | 0           | #NAME?       | 0.004437836 | 0.028775355 | Down |
| T | chr4  | <i>SMARCAD1</i> | 2.403252019 | 1.264987946  | 1.61E-06    | 9.43E-05    | Up   |
| T | chr7  | <i>ZCWPW1</i>   | Inf         | Inf          | 2.54E-05    | 0.000706318 | Up   |
| T | chr10 | <i>KIF20B</i>   | 2.421330441 | 1.275799979  | 6.50E-05    | 0.001427769 | Up   |
| T | chr3  | <i>GOLIM4</i>   | 2.38510446  | 1.254052453  | 0.001836929 | 0.015745665 | Up   |
| T | chr17 | <i>MPO</i>      | 0.31370327  | -1.672527526 | 1.42E-10    | 4.12E-08    | Down |
| T | chr10 | <i>PIK3AP1</i>  | 0.32547591  | -1.619377328 | 1.24E-07    | 1.32E-05    | Down |
| T | chr6  | <i>FGD2</i>     | 0.375962735 | -1.411338425 | 8.31E-06    | 0.000317546 | Down |
| T | chr7  | <i>COG5</i>     | 1.703310017 | 0.768341041  | 0.003978491 | 0.026562636 | Up   |
| T | chr6  | <i>PM20D2</i>   | Inf         | Inf          | 0.004349032 | 0.028340395 | Up   |
| T | chr9  | <i>GSN</i>      | 0.54886775  | -0.865469521 | 0.002948056 | 0.021656027 | Down |
| T | chr19 | <i>LILRB4</i>   | 0           | #NAME?       | 0.008712651 | 0.045999694 | Down |
| T | chr8  | <i>RNF5P1</i>   | 0.147947218 | -2.756845524 | 0.000115546 | 0.002175198 | Down |
| T | chr8  | <i>RBM12B</i>   | 1.82836962  | 0.870557753  | 0.001047586 | 0.010643935 | Up   |
| T | chr6  | <i>HDAC2</i>    | 1.761861636 | 0.81710063   | 0.002818398 | 0.02102277  | Up   |
| T | chr6  | <i>CCND3</i>    | 0.387164196 | -1.368982554 | 1.46E-05    | 0.000471867 | Down |
| T | chr8  | <i>PSD3</i>     | 1.898843019 | 0.92512064   | 0.003824596 | 0.025993334 | Up   |
| T | chr16 | <i>MT1X</i>     | 0.052256805 | -4.258237275 | 0.003005425 | 0.021898367 | Down |
| T | chr19 | <i>SAMD4B</i>   | 0.296361331 | -1.754570877 | 5.22E-10    | 1.34E-07    | Down |
| T | chr19 | <i>REXO1</i>    | 0.35363404  | -1.499670945 | 0.000228051 | 0.003533426 | Down |
| T | chr19 | <i>PPP1R37</i>  | 0.482188263 | -1.052331561 | 0.002003199 | 0.016720236 | Down |
| T | chr19 | <i>PPP1R12C</i> | 0.398654322 | -1.326789784 | 5.78E-05    | 0.001324732 | Down |
| T | chr5  | <i>ZFP2</i>     | 2.808085183 | 1.489586701  | 3.71E-05    | 0.000942834 | Up   |
| T | chr5  | <i>HARS2</i>    | 2.425072009 | 1.278027587  | 0.00051804  | 0.006363919 | Up   |
| T | chr12 | <i>CMAS</i>     | 1.786937461 | 0.837489144  | 0.003239863 | 0.023185547 | Up   |
| T | chr4  | <i>CLOCK</i>    | 2.200861374 | 1.138068277  | 0.006974988 | 0.039245741 | Up   |
| T | chr2  | <i>TTC7A</i>    | 0.482321758 | -1.051932202 | 0.000132205 | 0.002412146 | Down |
| T | chr11 | <i>API5</i>     | 1.924501645 | 0.944484904  | 0.004472295 | 0.028841639 | Up   |
| T | chr1  | <i>PLEKHA6</i>  | 0.320979371 | -1.639447513 | 0.000418083 | 0.005509409 | Down |
| T | chr19 | <i>POU2F2</i>   | 0.280505407 | -1.833899513 | 7.01E-05    | 0.001527301 | Down |
| T | chr11 | <i>NARS2</i>    | 2.194024567 | 1.13357968   | 0.005025469 | 0.031175591 | Up   |
| T | chr13 | <i>IFT88</i>    | 2.559822201 | 1.356043607  | 0.002767586 | 0.020797793 | Up   |
| T | chr3  | <i>PDHB</i>     | 1.799381886 | 0.847501405  | 0.003611093 | 0.024918224 | Up   |
| T | chr3  | <i>CAPN7</i>    | 2.572596416 | 1.363225147  | 8.72E-07    | 5.81E-05    | Up   |
| T | chr22 | <i>GTPBP1</i>   | 0.570882181 | -0.808735062 | 0.001080164 | 0.010890122 | Down |
| T | chr7  | <i>CHPF2</i>    | 0.579923306 | -0.786065976 | 0.005876514 | 0.035006851 | Down |
| T | chr10 | <i>SLIT1</i>    | 0.142310617 | -2.812884794 | 0.007711905 | 0.042008145 | Down |
| T | chr14 | <i>CFL2</i>     | 2.111312579 | 1.078140185  | 0.003628575 | 0.024967505 | Up   |

|   |       |                 |             |              |             |             |      |
|---|-------|-----------------|-------------|--------------|-------------|-------------|------|
| T | chr1  | <i>VPS72</i>    | 0.556363469 | -0.8459004   | 0.007417248 | 0.040984927 | Down |
| T | chr1  | <i>IFI44</i>    | 6.33025073  | 2.662262643  | 4.03E-05    | 0.001006097 | Up   |
| T | chr12 | <i>GAPDH</i>    | 0.418816331 | -1.255610397 | 6.46E-07    | 4.65E-05    | Down |
| T | chr3  | <i>RAP2B</i>    | 0.420313687 | -1.250461656 | 0.000524543 | 0.006413489 | Down |
| T | chr19 | <i>PTOV1</i>    | 0.432968488 | -1.207666068 | 4.78E-05    | 0.001139665 | Down |
| T | chr17 | <i>SDK2</i>     | 0           | #NAME?       | 6.32E-05    | 0.001401491 | Down |
| T | chr15 | <i>CASC5</i>    | 2.080541068 | 1.056958766  | 0.000499799 | 0.006238363 | Up   |
| T | chr19 | <i>SIPR4</i>    | 0.270179273 | -1.888011092 | 0.000575523 | 0.006880093 | Down |
| T | chr14 | <i>JAG2</i>     | 0.247441345 | -2.014841514 | 0.000294176 | 0.00426424  | Down |
| T | chr20 | <i>PREX1</i>    | 0.429047836 | -1.220789586 | 0.004173398 | 0.027442616 | Down |
| T | chr19 | <i>ZNF358</i>   | 0.19237578  | -2.378000917 | 2.90E-05    | 0.000776135 | Down |
| T | chr18 | <i>DTNA</i>     | 0.075414492 | -3.729014408 | 0.0004341   | 0.005646333 | Down |
| T | chr20 | <i>DLGAP4</i>   | 0.447567048 | -1.159824272 | 0.000109672 | 0.002104096 | Down |
| T | chr16 | <i>ZNF319</i>   | 0.309598105 | -1.691531455 | 0.000149322 | 0.002618357 | Down |
| T | chr17 | <i>RAI1</i>     | 0.393665076 | -1.344959364 | 0.003054372 | 0.022137411 | Down |
| T | chr15 | <i>MGA</i>      | 1.746817202 | 0.804728644  | 0.000737127 | 0.008231814 | Up   |
| T | chr2  | <i>XPO1</i>     | 1.955036224 | 0.967195339  | 0.001497903 | 0.013741559 | Up   |
| T | chr19 | <i>RABAC1</i>   | 0.397571358 | -1.330714268 | 7.21E-05    | 0.001558692 | Down |
| T | chr11 | <i>DLG2</i>     | 2.554870952 | 1.353250422  | 0.00155904  | 0.014124474 | Up   |
| T | chr1  | <i>MPZ</i>      | 0.041058918 | -4.606160578 | 0.000630656 | 0.007378953 | Down |
| T | chr6  | <i>COL11A2</i>  | 0.381947845 | -1.388552443 | 0.009268341 | 0.048001104 | Down |
| T | chr6  | <i>HMGA1</i>    | 0.43568448  | -1.198644374 | 0.000923245 | 0.009674416 | Down |
| T | chr1  | <i>RLF</i>      | 1.861968421 | 0.896828605  | 0.000597076 | 0.007081317 | Up   |
| T | chr5  | <i>SNORA74A</i> | 0.416727678 | -1.262823171 | 0.00080593  | 0.00877339  | Down |
| T | chr5  | <i>SNORA74B</i> | 0.301252403 | -1.730955347 | 1.36E-05    | 0.000447834 | Down |
| T | chr7  | <i>KRIT1</i>    | 2.496111991 | 1.319682664  | 1.27E-06    | 7.81E-05    | Up   |
| T | chr3  | <i>U2SURP</i>   | 2.020531309 | 1.014734707  | 0.000119239 | 0.002222269 | Up   |
| T | chr17 | <i>FAM117A</i>  | 0.469584117 | -1.090544484 | 6.93E-06    | 0.000280829 | Down |
| T | chr2  | <i>TIA1</i>     | 1.962556994 | 0.972734551  | 0.000144361 | 0.002565845 | Up   |
| T | chr2  | <i>EMILIN1</i>  | 0.368316449 | -1.440982265 | 7.79E-06    | 0.000307056 | Down |
| T | chr2  | <i>STAM2</i>    | 2.767301593 | 1.468479884  | 0.000893631 | 0.009478296 | Up   |
| T | chr7  | <i>MOSPD3</i>   | 0.128902011 | -2.95565332  | 1.98E-05    | 0.000592983 | Down |
| T | chr16 | <i>SALL1</i>    | 0           | #NAME?       | 0.000159526 | 0.00272406  | Down |
| T | chr13 | <i>TDRD3</i>    | 2.068950791 | 1.048899332  | 0.00181764  | 0.015672786 | Up   |
| T | chr18 | <i>IMPACT</i>   | 2.783113186 | 1.476699583  | 0.006658369 | 0.038098721 | Up   |
| T | chr10 | <i>ASAH2</i>    | Inf         | Inf          | 0.003751819 | 0.025612886 | Up   |
| T | chr17 | <i>TLK2</i>     | 2.145955739 | 1.10162032   | 0.00051805  | 0.006363919 | Up   |
| T | chr2  | <i>PUS10</i>    | 3.750387011 | 1.907039478  | 6.15E-08    | 7.24E-06    | Up   |
| T | chr2  | <i>GTF3C2</i>   | 0.554718224 | -0.850172972 | 0.000500178 | 0.006238363 | Down |
| T | chr2  | <i>GTF3C3</i>   | 1.782507811 | 0.833908399  | 0.003278043 | 0.023369043 | Up   |
| T | chr1  | <i>GSTM1</i>    | 0.319469336 | -1.646250634 | 0.000711029 | 0.008038203 | Down |
| T | chr20 | <i>ITCH</i>     | 1.748792336 | 0.806358984  | 0.001422034 | 0.013289295 | Up   |
| T | chr7  | <i>PPP1R9A</i>  | 2.101017862 | 1.071088427  | 0.000144632 | 0.002567172 | Up   |
| T | chr1  | <i>PADI2</i>    | 0.184309676 | -2.439796281 | 4.63E-09    | 8.50E-07    | Down |

|   |       |                |             |              |             |             |      |
|---|-------|----------------|-------------|--------------|-------------|-------------|------|
| T | chr1  | <i>PADI4</i>   | 0.409677521 | -1.287439361 | 0.000902599 | 0.009521113 | Down |
| T | chr10 | <i>ACTA2</i>   | 0.362948308 | -1.462164004 | 1.91E-07    | 1.80E-05    | Down |
| T | chr20 | <i>SPATA2</i>  | 0.307293643 | -1.702310171 | 2.60E-05    | 0.000716779 | Down |
| T | chr12 | <i>PUS1</i>    | 0.505897569 | -0.983082789 | 0.006960933 | 0.039202148 | Down |
| T | chr11 | <i>CCDC82</i>  | 6.338890133 | 2.664230263  | 4.31E-05    | 0.00106224  | Up   |
| T | chr19 | <i>ZNF836</i>  | 3.029860091 | 1.599251176  | 0.000147487 | 0.002596651 | Up   |
| T | chr9  | <i>DDX58</i>   | 2.399015119 | 1.26244225   | 0.001584514 | 0.014279399 | Up   |
| T | chr22 | <i>BCR</i>     | 0.400567624 | -1.319882274 | 0.006139064 | 0.03610921  | Down |
| T | chr6  | <i>TAPBP</i>   | 0.216679417 | -2.20636598  | 1.85E-08    | 2.57E-06    | Down |
| T | chr21 | <i>RWDD2B</i>  | 3.296253525 | 1.720827209  | 0.005038349 | 0.031225798 | Up   |
| T | chr8  | <i>ZHX1</i>    | 1.899105187 | 0.925319815  | 0.000302939 | 0.004349523 | Up   |
| T | chr2  | <i>STAMPB</i>  | 0.10777966  | -3.213843156 | 0.001200841 | 0.011766867 | Down |
| T | chr7  | <i>MAFK</i>    | 0.378275506 | -1.402490731 | 0.006935893 | 0.039120473 | Down |
| T | chr3  | <i>ATP11B</i>  | 1.773992298 | 0.826999746  | 0.000540207 | 0.006568072 | Up   |
| T | chr19 | <i>ZNF383</i>  | 4.320158083 | 2.111084104  | 0.001554056 | 0.014115892 | Up   |
| T | chr11 | <i>ATM</i>     | 2.141755732 | 1.098793949  | 1.60E-05    | 0.000501576 | Up   |
| T | chrX  | <i>ATRX</i>    | 2.005205127 | 1.003749828  | 2.44E-05    | 0.000690042 | Up   |
| T | chr17 | <i>LLGL1</i>   | 0.324017886 | -1.625854641 | 0.000711919 | 0.008041296 | Down |
| T | chr17 | <i>LLGL2</i>   | 0.278539928 | -1.844043948 | 0.000718764 | 0.00810458  | Down |
| T | chr2  | <i>ALMS1</i>   | 1.916641081 | 0.938580196  | 0.001651315 | 0.014724931 | Up   |
| T | chr1  | <i>B4GALT2</i> | 0.209931755 | -2.252007684 | 0.008902089 | 0.046627169 | Down |
| T | chr1  | <i>B4GALT3</i> | 0.549276469 | -0.864395607 | 0.008839054 | 0.04644152  | Down |
| T | chrX  | <i>ACSL4</i>   | 1.628353169 | 0.703413636  | 0.007790567 | 0.042330588 | Up   |
| T | chr3  | <i>GPX1</i>    | 0.328138823 | -1.607621801 | 7.59E-09    | 1.27E-06    | Down |
| T | chr12 | <i>KCTD10</i>  | 0.423933329 | -1.238090702 | 0.000737931 | 0.008231814 | Down |
| T | chr19 | <i>ZNF844</i>  | 2.713055098 | 1.439918347  | 0.002762983 | 0.020775721 | Up   |
| T | chr3  | <i>CPNE4</i>   | 0           | #NAME?       | 4.54E-06    | 0.000208663 | Down |
| T | chr14 | <i>ADCY4</i>   | 0.377658784 | -1.404844753 | 0.000925701 | 0.009684595 | Down |
| T | chr6  | <i>HLA-A</i>   | 0.559524259 | -0.837727413 | 0.002165058 | 0.017595063 | Down |
| T | chr6  | <i>HLA-B</i>   | 0.402478034 | -1.313018049 | 5.13E-05    | 0.001209788 | Down |
| T | chr15 | <i>CSK</i>     | 0.560060369 | -0.836345752 | 0.000440725 | 0.005709731 | Down |
| T | chr6  | <i>HLA-H</i>   | 0.421681527 | -1.245774273 | 0.006987645 | 0.039276526 | Down |
| T | chr9  | <i>SIGMAR1</i> | 0.47622277  | -1.07029149  | 0.006780395 | 0.03856017  | Down |
| T | chr11 | <i>VPS37C</i>  | 0.359003859 | -1.477928744 | 0.007024394 | 0.03943212  | Down |
| T | chr5  | <i>ZFYVE16</i> | 1.809323663 | 0.855450509  | 0.007755549 | 0.042193031 | Up   |
| T | chr9  | <i>GFI1B</i>   | 0.413890013 | -1.272680657 | 0.001801899 | 0.015606735 | Down |
| T | chr5  | <i>CLK4</i>    | 2.38562455  | 1.254367009  | 2.73E-06    | 0.000138067 | Up   |
| T | chr20 | <i>CENPB</i>   | 0.50602539  | -0.98271832  | 0.000370401 | 0.005033602 | Down |
| T | chr9  | <i>RXRA</i>    | 0.336376302 | -1.571852025 | 0.000772569 | 0.008491096 | Down |
| T | chr4  | <i>STAP1</i>   | 4.017926652 | 2.006451228  | 0.000137655 | 0.002480457 | Up   |
| T | chr5  | <i>CAPSL</i>   | Inf         | Inf          | 0.006170388 | 0.036260756 | Up   |
| T | chr1  | <i>TMEM39B</i> | 0.331928107 | -1.591057297 | 9.34E-06    | 0.000344029 | Down |
| T | chr20 | <i>ERGIC3</i>  | 0.615659673 | -0.699795022 | 0.007619453 | 0.0416611   | Down |
| T | chr17 | <i>RHOT1</i>   | 1.734619331 | 0.794619092  | 0.003425293 | 0.02408582  | Up   |

|   |       |                 |             |              |             |             |      |
|---|-------|-----------------|-------------|--------------|-------------|-------------|------|
| T | chr1  | <i>MYSM1</i>    | 1.84929532  | 0.886975632  | 0.002746323 | 0.020675597 | Up   |
| T | chr18 | <i>ALPK2</i>    | 0.036449902 | -4.777941265 | 0.005809524 | 0.034686976 | Down |
| T | chr14 | <i>EXOC5</i>    | 1.919272776 | 0.940559768  | 0.001197827 | 0.011766867 | Up   |
| T | chr1  | <i>DDX20</i>    | 1.735462559 | 0.79532024   | 0.008367072 | 0.044571995 | Up   |
| T | chr22 | <i>RAC2</i>     | 0.378895925 | -1.400126472 | 4.24E-09    | 7.90E-07    | Down |
| T | chr19 | <i>ERF</i>      | 0.363813198 | -1.458730215 | 0.000116483 | 0.002186526 | Down |
| T | chr17 | <i>ACTG1</i>    | 0.413569993 | -1.273796581 | 1.44E-08    | 2.16E-06    | Down |
| T | chr15 | <i>TRPM1</i>    | 0           | #NAME?       | 0.007835611 | 0.04252428  | Down |
| T | chr17 | <i>RUNDC1</i>   | 0.347038877 | -1.526830807 | 0.002430617 | 0.019039087 | Down |
| T | chr21 | <i>CBR3-AS1</i> | 0.046221785 | -4.435283205 | 4.70E-07    | 3.65E-05    | Down |
| T | chr15 | <i>TRPM7</i>    | 2.048962311 | 1.034893447  | 2.06E-05    | 0.000613332 | Up   |
| T | chr11 | <i>BCL9L</i>    | 0.255972237 | -1.965940751 | 0.000680001 | 0.007809239 | Down |
| T | chr11 | <i>FAM160A2</i> | 0.407662851 | -1.294551601 | 5.24E-05    | 0.001226873 | Down |
| T | chr19 | <i>LPAR2</i>    | 0.157967842 | -2.662297201 | 0.000118425 | 0.002210257 | Down |
| T | chr12 | <i>ATN1</i>     | 0.274679733 | -1.864177627 | 0.0094113   | 0.048567966 | Down |
| T | chr1  | <i>TROVE2</i>   | 3.951920862 | 1.982554057  | 0.001822771 | 0.015706402 | Up   |
| T | chr6  | <i>YIPF3</i>    | 0.40315167  | -1.310605397 | 0.000299658 | 0.004321319 | Down |
| T | chr6  | <i>TTK</i>      | 4.319839089 | 2.110977574  | 8.62E-06    | 0.000325878 | Up   |
| T | chr2  | <i>ALS2</i>     | 3.360679717 | 1.748753056  | 7.40E-08    | 8.32E-06    | Up   |
| T | chr1  | <i>PLEKHG5</i>  | 0.2924773   | -1.773603437 | 0.000412651 | 0.005454353 | Down |
| T | chr14 | <i>DAD1</i>     | 0.547729105 | -0.868465551 | 0.007678434 | 0.041843414 | Down |
| T | chr1  | <i>SRRM1</i>    | 0.533413385 | -0.906674067 | 0.000269394 | 0.003975698 | Down |
| T | chr12 | <i>ADCY6</i>    | 0.429538654 | -1.219140132 | 3.25E-05    | 0.000850085 | Down |
| T | chr10 | <i>CHST15</i>   | 0.461636682 | -1.115170228 | 0.000706551 | 0.008008393 | Down |
| T | chr8  | <i>RHOBTB2</i>  | 0.499251113 | -1.00216245  | 0.000681568 | 0.007820349 | Down |
| T | chr5  | <i>GM2A</i>     | 0.134332064 | -2.896124394 | 1.67E-05    | 0.000520332 | Down |
| T | chr1  | <i>WLS</i>      | 1.949671156 | 0.963230811  | 0.000295424 | 0.004277578 | Up   |
| T | chr8  | <i>CPSF1</i>    | 0.596240185 | -0.746034482 | 0.002876032 | 0.02133071  | Down |
| T | chr19 | <i>SHANK1</i>   | 0.098818989 | -3.33906789  | 1.39E-05    | 0.000455557 | Down |
| T | chr19 | <i>PTBP1</i>    | 0.524804846 | -0.930147054 | 7.61E-05    | 0.001606122 | Down |
| T | chr17 | <i>KAT2A</i>    | 0.580828197 | -0.783816603 | 0.002268888 | 0.018189762 | Down |
| T | chr22 | <i>PLXNB2</i>   | 0.495143672 | -1.014080893 | 0.006375742 | 0.036967969 | Down |
| T | chr3  | <i>NKTR</i>     | 1.635659691 | 0.709872618  | 0.006926772 | 0.039102842 | Up   |
| T | chr22 | <i>MICALL1</i>  | 0.329601809 | -1.601203935 | 0.001072831 | 0.010832932 | Down |
| T | chr19 | <i>DYRK1B</i>   | 0.294695379 | -1.762703659 | 3.28E-05    | 0.000855333 | Down |
| T | chr17 | <i>SLC9A3R1</i> | 0.347503792 | -1.524899374 | 2.03E-06    | 0.000113144 | Down |
| T | chr5  | <i>GRIA1</i>    | 0.10777966  | -3.213843156 | 0.002411009 | 0.018902659 | Down |
| T | chr17 | <i>UTP18</i>    | 2.185704662 | 1.128098473  | 0.000897516 | 0.009497112 | Up   |
| T | chr4  | <i>MFSD10</i>   | 0.311417797 | -1.683076698 | 5.27E-05    | 0.001231502 | Down |
| T | chr18 | <i>ESCO1</i>    | 2.227571807 | 1.155471939  | 5.36E-05    | 0.001249809 | Up   |
| T | chr8  | <i>LPL</i>      | 13.23771876 | 3.726582621  | 0.005274049 | 0.032212194 | Up   |
| T | chr5  | <i>TARS</i>     | 1.764581135 | 0.819325766  | 0.005222037 | 0.031993737 | Up   |
| T | chr2  | <i>ADD2</i>     | 0.233567638 | -2.098087699 | 0.002860732 | 0.021277713 | Down |
| T | chr15 | <i>BBS4</i>     | 2.509468481 | 1.327381826  | 0.004272231 | 0.027937608 | Up   |

|   |       |                  |             |              |             |             |      |
|---|-------|------------------|-------------|--------------|-------------|-------------|------|
| T | chr13 | <i>ALOX5AP</i>   | 0.553212345 | -0.854094745 | 0.009038583 | 0.047072795 | Down |
| T | chr20 | <i>GNAS</i>      | 0.611919992 | -0.708585061 | 0.001443777 | 0.013453936 | Down |
| T | chr10 | <i>EXOC6</i>     | 1.753568909 | 0.810294124  | 0.001627029 | 0.014548468 | Up   |
| T | chr19 | <i>CSNK1G2</i>   | 0.588429402 | -0.765058759 | 0.005481292 | 0.033167409 | Down |
| T | chr17 | <i>ENGASE</i>    | 0.109254999 | -3.194228808 | 1.86E-05    | 0.000564003 | Down |
| T | chr14 | <i>MYH6</i>      | 0.080921611 | -3.627331146 | 0.001861204 | 0.015859742 | Down |
| T | chr17 | <i>DNAH2</i>     | 0.052834216 | -4.242383661 | 4.68E-08    | 5.87E-06    | Down |
| T | chr2  | <i>SIX3</i>      | 0.029159921 | -5.09986936  | 1.80E-05    | 0.000555994 | Down |
| T | chr19 | <i>KDELR1</i>    | 0.453959348 | -1.139364985 | 3.80E-05    | 0.000955    | Down |
| T | chr1  | <i>RNU11</i>     | 0.187780934 | -2.412877505 | 2.58E-20    | 8.42E-17    | Down |
| T | chr15 | <i>NR2F2</i>     | 0.083794222 | -3.577005428 | 0.000532568 | 0.006498241 | Down |
| T | chr17 | <i>DNAH9</i>     | 0.407778103 | -1.294143789 | 0.002534495 | 0.019590815 | Down |
| T | chr1  | <i>LOC148709</i> | 0.166617025 | -2.58539227  | 0.002431329 | 0.019039087 | Down |
| T | chr11 | <i>RASGRP2</i>   | 0.410766784 | -1.283608571 | 4.04E-07    | 3.27E-05    | Down |
| T | chr19 | <i>MKMK2</i>     | 0.410225813 | -1.285509819 | 3.38E-07    | 2.83E-05    | Down |
| T | chr11 | <i>KLC2</i>      | 0.427440072 | -1.226205931 | 0.004638515 | 0.029547881 | Down |
| T | chr8  | <i>SLC25A32</i>  | 3.114227907 | 1.638874528  | 0.004080782 | 0.026983214 | Up   |
| T | chr17 | <i>RPS6KB1</i>   | 2.184520177 | 1.127316431  | 7.24E-05    | 0.001558692 | Up   |
| T | chr4  | <i>RFC1</i>      | 1.800307775 | 0.848243567  | 0.001365706 | 0.012948402 | Up   |
| T | chr5  | <i>BDP1</i>      | 1.788682008 | 0.838896928  | 0.005412406 | 0.03285726  | Up   |
| T | chr4  | <i>DDX60</i>     | 4.693804851 | 2.230757862  | 1.44E-07    | 1.47E-05    | Up   |
| T | chr10 | <i>ZSWIM8</i>    | 0.473343495 | -1.079040598 | 0.000151126 | 0.002637183 | Down |
| T | chr2  | <i>ITGA4</i>     | 1.659337114 | 0.730607017  | 0.003495333 | 0.024463578 | Up   |
| T | chr19 | <i>GEMIN7</i>    | 0.11284246  | -3.147618072 | 2.56E-06    | 0.000131657 | Down |
| T | chr9  | <i>TRIM32</i>    | 0.511027403 | -0.96852744  | 0.009458404 | 0.048733941 | Down |
| T | chr2  | <i>ITGA6</i>     | 2.02040103  | 1.014641682  | 0.000152081 | 0.002645397 | Up   |
| T | chr11 | <i>RAD9A</i>     | 0.411664598 | -1.28045871  | 0.002773802 | 0.020809097 | Down |
| T | chr9  | <i>FAM78A</i>    | 0.522936512 | -0.93529229  | 0.005223282 | 0.031993737 | Down |
| T | chr19 | <i>GATAD2A</i>   | 0.409335485 | -1.288644356 | 8.66E-06    | 0.000326497 | Down |
| T | chr15 | <i>MESDC1</i>    | 0.321768934 | -1.635903049 | 0.000781422 | 0.008559555 | Down |
| T | chr11 | <i>GVINP1</i>    | 3.034496272 | 1.601457048  | 3.90E-11    | 1.34E-08    | Up   |
| T | chr3  | <i>ITGB5</i>     | 0.412538285 | -1.277400082 | 0.000111792 | 0.002125996 | Down |
| T | chr8  | <i>ARHGAP39</i>  | 0.426897097 | -1.228039742 | 0.006053991 | 0.035770091 | Down |
| T | chr15 | <i>NEIL1</i>     | 0.350707193 | -1.511661076 | 0.002442533 | 0.019081009 | Down |
| T | chr14 | <i>KIAA0586</i>  | 1.867622533 | 0.9012029    | 0.008566075 | 0.045473859 | Up   |
| T | chr10 | <i>MRPL43</i>    | 0.277501653 | -1.849431729 | 1.84E-05    | 0.000560103 | Down |
| T | chr16 | <i>PARD6A</i>    | 0.31934714  | -1.646802563 | 0.000357874 | 0.00492492  | Down |
| T | chr12 | <i>LARP4</i>     | 2.042371476 | 1.030245294  | 8.59E-05    | 0.001756783 | Up   |
| T | chr12 | <i>COX14</i>     | 0.181082923 | -2.465277594 | 0.002306454 | 0.018358751 | Down |
| T | chr15 | <i>MEF2A</i>     | 1.605476327 | 0.683001393  | 0.007409024 | 0.040956834 | Up   |
| T | chr8  | <i>FAM92A1</i>   | 4.030951319 | 2.01112036   | 0.002586422 | 0.019848503 | Up   |
| T | chr3  | <i>TOP2B</i>     | 2.30962498  | 1.207658616  | 4.54E-07    | 3.56E-05    | Up   |
| T | chr15 | <i>VPS13C</i>    | 1.704752554 | 0.769562346  | 0.003581077 | 0.024810794 | Up   |
| T | chr2  | <i>ZNF638</i>    | 1.893278807 | 0.92088688   | 0.000155616 | 0.002680466 | Up   |

|   |       |                 |             |              |             |             |      |
|---|-------|-----------------|-------------|--------------|-------------|-------------|------|
| T | chr19 | <i>ATP4A</i>    | 0.163338503 | -2.61406318  | 0.000123723 | 0.00228301  | Down |
| T | chr2  | <i>TMEM214</i>  | 0.442306114 | -1.176882909 | 0.000410866 | 0.005441782 | Down |
| T | chr3  | <i>TMF1</i>     | 1.929372829 | 0.948131954  | 0.001426757 | 0.013309484 | Up   |
| T | chr10 | <i>KCNMA1</i>   | 0.03430579  | -4.865404106 | 0.000110432 | 0.002113201 | Down |
| T | chr1  | <i>MTF2</i>     | 2.23741452  | 1.161832566  | 1.84E-06    | 0.000105432 | Up   |
| T | chr17 | <i>GLOD4</i>    | 2.387167733 | 1.25529994   | 0.000698162 | 0.007968696 | Up   |
| T | chr17 | <i>UTP6</i>     | 2.171326496 | 1.118576676  | 0.001899002 | 0.016076821 | Up   |
| T | chr3  | <i>SLC6A6</i>   | 0.545983474 | -0.873070812 | 0.000763044 | 0.008410043 | Down |
| T | chr19 | <i>BAX</i>      | 0.439525004 | -1.185982853 | 0.001070967 | 0.010822494 | Down |
| T | chr10 | <i>SEMA4G</i>   | 0.295178566 | -1.760340129 | 0.004525446 | 0.029126277 | Down |
| T | chr7  | <i>GPR22</i>    | 2.749689698 | 1.45926882   | 0.000190499 | 0.003086894 | Up   |
| T | chr14 | <i>SNORA28</i>  | 0.15693561  | -2.671755347 | 1.92E-16    | 3.13E-13    | Down |
| T | chr2  | <i>KIAA1841</i> | 2.557436955 | 1.354698675  | 3.76E-05    | 0.000948065 | Up   |
| T | chr5  | <i>SRA1</i>     | 2.721090023 | 1.444184687  | 0.00878936  | 0.046310981 | Up   |
| T | chr7  | <i>GNG11</i>    | 4.25705334  | 2.089855167  | 0.008300818 | 0.044363979 | Up   |
| T | chr4  | <i>UBA6</i>     | 1.979228535 | 0.984938205  | 0.000415359 | 0.005484588 | Up   |
| T | chr3  | <i>CCNL1</i>    | 1.888926134 | 0.917566287  | 0.000195344 | 0.003152364 | Up   |
| T | chr19 | <i>TYK2</i>     | 0.306171293 | -1.707589076 | 2.52E-07    | 2.23E-05    | Down |
| T | chr19 | <i>TMEM145</i>  | 0.014579961 | -6.09986936  | 2.28E-06    | 0.0001209   | Down |
| T | chr3  | <i>OPA1</i>     | 1.833452724 | 0.874563066  | 0.001416106 | 0.013262398 | Up   |
| T | chr1  | <i>IRF2BP2</i>  | 0.571561421 | -0.807019555 | 0.000475009 | 0.006028183 | Down |
| T | chr2  | <i>STAT1</i>    | 1.776090571 | 0.828705153  | 0.006827731 | 0.038744922 | Up   |
| T | chr2  | <i>STAT4</i>    | 1.658108686 | 0.729538576  | 0.006613676 | 0.037942838 | Up   |
| T | chr7  | <i>NAA38</i>    | 0.461597045 | -1.115294107 | 0.003661069 | 0.025151295 | Down |
| T | chr2  | <i>CPSF3</i>    | 1.819735469 | 0.863728745  | 0.001204024 | 0.011783717 | Up   |
| T | chr19 | <i>MLLT1</i>    | 0.534214446 | -0.904509106 | 0.005848885 | 0.034858182 | Down |
| T | chr7  | <i>MRPS33</i>   | Inf         | Inf          | 0.000779312 | 0.008550807 | Up   |
| T | chr13 | <i>CLN5</i>     | 3.853838586 | 1.946296147  | 0.000730674 | 0.008182295 | Up   |
| T | chr12 | <i>LPAR5</i>    | 0.149552512 | -2.741275951 | 0.000659531 | 0.0076082   | Down |
| T | chr4  | <i>NAA15</i>    | 1.55778158  | 0.639492964  | 0.007532422 | 0.041318166 | Up   |
| T | chr5  | <i>IQGAP2</i>   | 1.978880009 | 0.984684136  | 4.80E-05    | 0.001141234 | Up   |
| T | chr10 | <i>NDST2</i>    | 0.600778407 | -0.735095133 | 0.005067244 | 0.031374206 | Down |
| T | chr18 | <i>SMCHD1</i>   | 1.909364752 | 0.933092732  | 0.000153056 | 0.002651748 | Up   |
| T | chr1  | <i>LYPLA2</i>   | 0.382370753 | -1.386955918 | 7.58E-05    | 0.001605345 | Down |
| T | chr18 | <i>NDC80</i>    | 1.858344041 | 0.894017617  | 0.009355731 | 0.048357712 | Up   |
| T | chr9  | <i>SNORA65</i>  | 0.351764276 | -1.507319121 | 6.05E-05    | 0.00135951  | Down |
| T | chr18 | <i>RPRD1A</i>   | 2.207651308 | 1.142512321  | 0.004461129 | 0.028841639 | Up   |
| T | chr14 | <i>EIF5</i>     | 1.655335993 | 0.727124079  | 0.008146645 | 0.043773117 | Up   |
| T | chrX  | <i>RP2</i>      | 2.110993713 | 1.077922282  | 0.001377752 | 0.013002562 | Up   |
| T | chr8  | <i>SYBU</i>     | 0.134963156 | -2.889362475 | 0.004406149 | 0.028626802 | Down |
| T | chr10 | <i>CNNM2</i>    | 0.481438978 | -1.054575144 | 0.001660315 | 0.01476515  | Down |
| T | chr10 | <i>SKIDA1</i>   | 0.278823299 | -1.842576972 | 0.002658517 | 0.020235127 | Down |
| T | chr17 | <i>MLLT6</i>    | 0.491650755 | -1.024294237 | 0.000447344 | 0.005776835 | Down |
| T | chr2  | <i>MITD1</i>    | 3.297507341 | 1.721375871  | 0.002348424 | 0.018568202 | Up   |

|   |       |                   |             |              |             |             |      |
|---|-------|-------------------|-------------|--------------|-------------|-------------|------|
| T | chr7  | <i>LHFPL3-AS2</i> | 0.373630065 | -1.420317544 | 0.000133684 | 0.002422659 | Down |
| T | chr22 | <i>KIAA1671</i>   | 0.16363756  | -2.611424167 | 0.006283203 | 0.036647452 | Down |
| T | chr6  | <i>PRRC2A</i>     | 0.307564794 | -1.701037722 | 0.005931403 | 0.035237286 | Down |
| T | chr14 | <i>HECTD1</i>     | 1.567651522 | 0.648604894  | 0.005712105 | 0.034246382 | Up   |
| T | chr11 | <i>PCNXL3</i>     | 0.236829704 | -2.078078055 | 3.96E-06    | 0.00018712  | Down |
| T | chr17 | <i>GOSR1</i>      | 2.723063105 | 1.445230416  | 0.001194964 | 0.011747926 | Up   |
| T | chr1  | <i>GOLPH3L</i>    | 2.104645414 | 1.073577192  | 0.000219207 | 0.003424873 | Up   |
| T | chr2  | <i>UGP2</i>       | 2.024039043 | 1.01723712   | 0.000466977 | 0.005942807 | Up   |
| T | chr11 | <i>MMP8</i>       | 0.157531648 | -2.666286396 | 0.009526356 | 0.048968024 | Down |
| T | chr13 | <i>SPG20</i>      | 3.600390892 | 1.848153548  | 0.001083124 | 0.010903115 | Up   |
| T | chr3  | <i>TBC1D23</i>    | 2.298927104 | 1.200960721  | 0.00039301  | 0.005264078 | Up   |
| T | chr10 | <i>PPRC1</i>      | 0.343425388 | -1.541931398 | 0.001853737 | 0.015829846 | Down |
| T | chr14 | <i>TMED10</i>     | 0.405568538 | -1.301982355 | 2.03E-06    | 0.000113144 | Down |
| T | chr17 | <i>RFNG</i>       | 0.206267061 | -2.277414641 | 0.003499864 | 0.024469041 | Down |
| T | chr19 | <i>ACTN4</i>      | 0.522881232 | -0.935444807 | 0.007191852 | 0.040130413 | Down |
| T | chr4  | <i>GPM6A</i>      | 0.203371923 | -2.297807577 | 0.005017083 | 0.031138374 | Down |
| T | chr22 | <i>SH3BP1</i>     | 0.290317836 | -1.784294889 | 1.31E-05    | 0.00043963  | Down |
| T | chr9  | <i>NAIF1</i>      | 0.257066822 | -1.959784671 | 0.00199358  | 0.016655883 | Down |
| T | chr6  | <i>CUL9</i>       | 0.274569194 | -1.864758325 | 5.41E-07    | 4.03E-05    | Down |
| T | chrX  | <i>ABCD1</i>      | 0.51466658  | -0.958289992 | 0.003258603 | 0.023255876 | Down |
| T | chr8  | <i>RAD54B</i>     | 4.80273672  | 2.263856724  | 7.70E-07    | 5.34E-05    | Up   |
| T | chr6  | <i>ABRA1</i>      | 2.539671713 | 1.344642021  | 0.002672397 | 0.020282226 | Up   |
| T | chr5  | <i>FAM13B</i>     | 1.626934986 | 0.7021566    | 0.006422453 | 0.037156239 | Up   |
| T | chr2  | <i>7-Mar</i>      | 2.925580987 | 1.548723156  | 9.60E-07    | 6.23E-05    | Up   |
| T | chr5  | <i>PANK3</i>      | 1.928792657 | 0.947698064  | 0.00526923  | 0.032197835 | Up   |
| T | chr3  | <i>PDCD10</i>     | 2.310777434 | 1.208378311  | 0.003402025 | 0.023964805 | Up   |
| T | chr19 | <i>TMEM160</i>    | 0.218582155 | -2.193752473 | 0.004388942 | 0.028543436 | Down |
| T | chr10 | <i>VPS26A</i>     | 2.110589672 | 1.077646126  | 0.000675618 | 0.007765743 | Up   |
| T | chr1  | <i>RNASL</i>      | 5.806494574 | 2.53766746   | 0.001134358 | 0.011340103 | Up   |
| T | chr14 | <i>MBIP</i>       | 2.398904882 | 1.262375955  | 0.000447676 | 0.005776835 | Up   |
| T | chr16 | <i>SNX29</i>      | 0.498219957 | -1.005145282 | 0.002707957 | 0.020469015 | Down |
| T | chr8  | <i>ARFGF1</i>     | 1.718246989 | 0.780937431  | 0.001038055 | 0.010563548 | Up   |
| T | chr2  | <i>SNORA75</i>    | 0.265272865 | -1.914450988 | 0.000532969 | 0.006498241 | Down |
| T | chrX  | <i>ZNF449</i>     | 4.287296856 | 2.100068314  | 0.000973117 | 0.010083629 | Up   |
| T | chr8  | <i>YTHDF3</i>     | 1.849155318 | 0.886866408  | 0.000228321 | 0.003533426 | Up   |
| T | chr20 | <i>CHRNA4</i>     | 0.028322564 | -5.141904319 | 0.003170071 | 0.022730093 | Down |
| T | chr1  | <i>MIER1</i>      | 1.946848481 | 0.961140606  | 0.000266357 | 0.003942546 | Up   |
| T | chr5  | <i>PAIP2</i>      | 1.78506337  | 0.835975291  | 0.002099542 | 0.017283491 | Up   |
| T | chr2  | <i>ADI1</i>       | 0.356913531 | -1.486353499 | 0.000235176 | 0.003604637 | Down |
| T | chr1  | <i>PLEKHM2</i>    | 0.455090544 | -1.135774485 | 0.000493195 | 0.006170036 | Down |
| T | chr22 | <i>IL17RA</i>     | 0.46683354  | -1.099019879 | 0.007028308 | 0.039435787 | Down |
| T | chr15 | <i>SCARNA14</i>   | 0.152405801 | -2.714010274 | 4.20E-05    | 0.001041433 | Down |
| T | chr5  | <i>OXCT1</i>      | 2.915604969 | 1.543795264  | 2.50E-07    | 2.22E-05    | Up   |
| T | chr14 | <i>STYX</i>       | 1.949633445 | 0.963202905  | 0.002553556 | 0.019677311 | Up   |

|   |       |                  |             |              |             |             |      |
|---|-------|------------------|-------------|--------------|-------------|-------------|------|
| T | chr1  | <i>HIST2H3D</i>  | 0.224113002 | -2.157701745 | 8.23E-11    | 2.68E-08    | Down |
| T | chr12 | <i>SLC48A1</i>   | 0.473277683 | -1.0792412   | 0.004895188 | 0.030615628 | Down |
| T | chr10 | <i>GLRX3</i>     | 1.695992787 | 0.762130034  | 0.005281189 | 0.032240707 | Up   |
| T | chrX  | <i>TXLNG</i>     | 2.187229117 | 1.129104354  | 0.000234584 | 0.003604637 | Up   |
| T | chr11 | <i>CD6</i>       | 0.022430709 | -5.478380983 | 0.000270208 | 0.00397871  | Down |
| T | chr8  | <i>CEBPD</i>     | 0.024299934 | -5.362903766 | 0.000199136 | 0.003190947 | Down |
| T | chr15 | <i>BNIP2</i>     | 2.185450917 | 1.127930977  | 0.001810776 | 0.015644624 | Up   |
| T | chr5  | <i>YTHDC2</i>    | 1.71497686  | 0.778189111  | 0.00540795  | 0.032845493 | Up   |
| T | chr19 | <i>STK11</i>     | 0.433510184 | -1.20586221  | 0.000132524 | 0.002412146 | Down |
| T | chr17 | <i>ATAD5</i>     | 3.475985523 | 1.797422074  | 1.60E-07    | 1.57E-05    | Up   |
| T | chr14 | <i>NEMF</i>      | 1.841633768 | 0.880986192  | 0.001256474 | 0.012169233 | Up   |
| T | chr19 | <i>RNF126</i>    | 0.278118082 | -1.846230548 | 9.75E-06    | 0.000354165 | Down |
| T | chr2  | <i>MPHOSPH10</i> | 2.501239838 | 1.322643401  | 0.000237746 | 0.003631886 | Up   |
| T | chr13 | <i>SPRY2</i>     | 0.480130209 | -1.058502385 | 0.001679736 | 0.014877008 | Down |
| T | chr18 | <i>CEP192</i>    | 1.782229794 | 0.833683364  | 0.003566291 | 0.024734629 | Up   |
| T | chr18 | <i>RIOK3</i>     | 2.701282727 | 1.433644646  | 5.65E-07    | 4.17E-05    | Up   |
| T | chrX  | <i>ZNF280C</i>   | 2.476390395 | 1.308238768  | 0.000107532 | 0.002069118 | Up   |
| T | chr19 | <i>POLRMT</i>    | 0.202386797 | -2.304812921 | 0.006150175 | 0.03615826  | Down |
| T | chr2  | <i>UBXN4</i>     | 2.047043019 | 1.033541421  | 0.003621584 | 0.024945715 | Up   |
| T | chr3  | <i>GATA2</i>     | 0.444628224 | -1.169328565 | 0.005621055 | 0.033871724 | Down |
| T | chr18 | <i>SMAD2</i>     | 1.910178847 | 0.933707722  | 0.00045937  | 0.0058812   | Up   |
| T | chr3  | <i>NT5DC2</i>    | 0.492616732 | -1.021462464 | 0.000986601 | 0.010171693 | Down |
| T | chr18 | <i>SMAD7</i>     | 0.400567365 | -1.31988321  | 2.24E-06    | 0.000120316 | Down |
| T | chr16 | <i>SOLH</i>      | 0.425275586 | -1.233530059 | 0.008957558 | 0.046772002 | Down |
| T | chr8  | <i>EGR3</i>      | 0.235536239 | -2.085979051 | 0.004770867 | 0.030082519 | Down |
| T | chr1  | <i>CAPZB</i>     | 0.467776767 | -1.096107886 | 5.14E-06    | 0.000227871 | Down |
| T | chr4  | <i>SPATA5</i>    | 2.171281818 | 1.11854699   | 0.002333395 | 0.01849421  | Up   |
| T | chr1  | <i>FAM58BP</i>   | 0.35321929  | -1.501363963 | 0.008130433 | 0.043740052 | Down |
| T | chr15 | <i>ZNF710</i>    | 0.382120029 | -1.387902216 | 2.54E-06    | 0.000130785 | Down |
| T | chr7  | <i>TNS3</i>      | 0.508261084 | -0.976358322 | 0.008225415 | 0.044051216 | Down |
| T | chr11 | <i>CREBZF</i>    | 1.739336206 | 0.798536826  | 0.007544509 | 0.041355319 | Up   |
| T | chr14 | <i>ZFHX2</i>     | 0.252446889 | -1.985948198 | 0.003302067 | 0.023487442 | Down |
| T | chr12 | <i>TARBP2</i>    | 0.537618699 | -0.895344777 | 0.008376202 | 0.044602422 | Down |
| T | chr2  | <i>SCN9A</i>     | 0           | #NAME?       | 0.001002003 | 0.010260695 | Down |
| T | chr9  | <i>UBAP2</i>     | 0.438929528 | -1.187938766 | 5.60E-05    | 0.001295556 | Down |
| T | chr20 | <i>SLC35C2</i>   | 0.352195376 | -1.505552129 | 2.13E-06    | 0.000116432 | Down |
| T | chr4  | <i>SCLT1</i>     | 3.612009891 | 1.852801843  | 0.003300354 | 0.023487442 | Up   |
| T | chr1  | <i>CYP2J2</i>    | 4.207451956 | 2.072946798  | 9.97E-06    | 0.000359194 | Up   |
| T | chr2  | <i>MTIF2</i>     | 3.30202751  | 1.72335214   | 2.69E-06    | 0.000136694 | Up   |
| T | chr17 | <i>EPX</i>       | 0.344953273 | -1.535527145 | 0.000195482 | 0.003152364 | Down |
| T | chr18 | <i>PIGN</i>      | 1.899009869 | 0.925247403  | 0.001362499 | 0.012928752 | Up   |
| T | chr3  | <i>GTPBP8</i>    | 5.523268936 | 2.465522376  | 0.002746498 | 0.020675597 | Up   |
| T | chr11 | <i>EIF3M</i>     | 1.937412287 | 0.954130996  | 0.001499429 | 0.013741559 | Up   |
| T | chr3  | <i>NMD3</i>      | 1.907320339 | 0.931547168  | 0.003323921 | 0.023605808 | Up   |

|   |       |                 |             |              |             |             |      |
|---|-------|-----------------|-------------|--------------|-------------|-------------|------|
| T | chr12 | <i>GLIPR1</i>   | 2.769563343 | 1.469658535  | 0.006301317 | 0.036647452 | Up   |
| T | chr19 | <i>JUNB</i>     | 0.33201462  | -1.590681322 | 4.70E-07    | 3.65E-05    | Down |
| T | chr19 | <i>JUND</i>     | 0.336880778 | -1.569689984 | 6.20E-06    | 0.000255819 | Down |
| T | chr10 | <i>HNRNPF</i>   | 1.73754729  | 0.797052243  | 0.00954128  | 0.049006119 | Up   |
| T | chr3  | <i>FAM208A</i>  | 2.2747248   | 1.185692016  | 3.72E-06    | 0.000177708 | Up   |
| T | chr14 | <i>JPH4</i>     | 0.022430709 | -5.478380983 | 0.000494094 | 0.006174279 | Down |
| T | chr14 | <i>ANGEL1</i>   | 0.394843421 | -1.340647444 | 0.005911546 | 0.03518341  | Down |
| T | chr3  | <i>CCDC14</i>   | 7.914308693 | 2.984463338  | 0.003672625 | 0.025217401 | Up   |
| D | chr10 | <i>EIF3A</i>    | 1.659276163 | 0.730554022  | 0.002638502 | 0.035710093 | Up   |
| D | chr12 | <i>PXN</i>      | 0.405728994 | -1.301411691 | 3.09E-06    | 0.000335461 | Down |
| D | chr7  | <i>C7orf23</i>  | 0.403550976 | -1.309177172 | 0.001359878 | 0.023530934 | Down |
| D | chr12 | <i>CACNA1C</i>  | 0.083732634 | -3.578066188 | 0.00238593  | 0.033157536 | Down |
| D | chr7  | <i>TMEM178B</i> | 0.049967053 | -4.322879068 | 0.000820947 | 0.016709663 | Down |
| D | chr5  | <i>CAMK2A</i>   | 0.335255832 | -1.576665665 | 0.000192199 | 0.006770462 | Down |
| D | chr12 | <i>FOXJ2</i>    | 0.381185333 | -1.391435486 | 0.000545647 | 0.013039603 | Down |
| D | chr20 | <i>SLC9A8</i>   | 0.550577029 | -0.860983676 | 0.003887064 | 0.046254261 | Down |
| D | chr3  | <i>ETV5</i>     | 0.40847478  | -1.291681089 | 0.000727802 | 0.015627214 | Down |
| D | chr1  | <i>MAP7D1</i>   | 0.5278793   | -0.92172     | 0.004136181 | 0.047629971 | Down |
| D | chr4  | <i>G3BP2</i>    | 1.705173037 | 0.769918148  | 0.001956966 | 0.029334612 | Up   |
| D | chr7  | <i>SNORA9</i>   | 0.157777881 | -2.664033128 | 3.50E-21    | 6.52E-18    | Down |
| D | chr8  | <i>ELP3</i>     | 1.819180435 | 0.863288644  | 0.003347767 | 0.041646614 | Up   |
| D | chr2  | <i>CEBPZ</i>    | 2.168437306 | 1.116655733  | 6.35E-05    | 0.00306807  | Up   |
| D | chr8  | <i>NACAP1</i>   | 2.504259092 | 1.324383832  | 0.00034895  | 0.009918833 | Up   |
| D | chr3  | <i>RBM6</i>     | 1.698340391 | 0.764125641  | 0.002392885 | 0.033211458 | Up   |
| D | chr5  | <i>DBN1</i>     | 0.219476276 | -2.187863092 | 0.001720519 | 0.026883361 | Down |
| D | chr22 | <i>ELFN2</i>    | 0.031353754 | -4.995218014 | 0.000190062 | 0.006767101 | Down |
| D | chr15 | <i>ANXA2</i>    | 5.009573393 | 2.324687751  | 0.000734596 | 0.015627214 | Up   |
| D | chr9  | <i>ZNF462</i>   | 0.420085518 | -1.251245043 | 0.002734226 | 0.036438662 | Down |
| D | chr14 | <i>FBXO33</i>   | 1.971874126 | 0.979567461  | 0.000581199 | 0.013662883 | Up   |
| D | chr10 | <i>ATAD1</i>    | 1.938837435 | 0.955191843  | 0.001497316 | 0.024822729 | Up   |
| D | chr19 | <i>LENG8</i>    | 0.548641648 | -0.866063951 | 0.003356679 | 0.041646614 | Down |
| D | chr3  | <i>GMPS</i>     | 1.885510965 | 0.914955541  | 0.001454152 | 0.024388751 | Up   |
| D | chr17 | <i>EPN3</i>     | 0.019147194 | -5.70672322  | 0.000783914 | 0.01626029  | Down |
| D | chr6  | <i>IRF4</i>     | 17.97738803 | 4.168111519  | 0.003204657 | 0.040345194 | Up   |
| D | chr2  | <i>SLC5A7</i>   | 0           | #NAME?       | 0.002740449 | 0.036447268 | Down |
| D | chr8  | <i>NBN</i>      | 4.712767155 | 2.236574403  | 1.78E-05    | 0.001239292 | Up   |
| D | chr9  | <i>ADAMTSL1</i> | 0.054130974 | -4.20740185  | 0.003554832 | 0.043386247 | Down |
| D | chr7  | <i>SLC4A2</i>   | 0.493833242 | -1.017904141 | 0.000735091 | 0.015627214 | Down |
| D | chr2  | <i>SPEG</i>     | 0           | #NAME?       | 1.99E-06    | 0.00024397  | Down |
| D | chr19 | <i>TGFB1</i>    | 0.32284943  | -1.631066615 | 1.14E-05    | 0.000885662 | Down |
| D | chr16 | <i>SHCBP1</i>   | 3.448362602 | 1.785911485  | 0.00373213  | 0.044631625 | Up   |
| D | chr6  | <i>NOL7</i>     | 2.503560746 | 1.323981461  | 0.001534821 | 0.025283845 | Up   |
| D | chr5  | <i>IPO11</i>    | 1.802881658 | 0.850304701  | 0.001398404 | 0.023818513 | Up   |
| D | chr15 | <i>CTSH</i>     | 8.120134135 | 3.021503559  | 0.000348865 | 0.009918833 | Up   |

|   |       |                 |             |              |             |             |      |
|---|-------|-----------------|-------------|--------------|-------------|-------------|------|
| D | chr1  | <i>TAS1R1</i>   | 0.099913011 | -3.323183632 | 1.71E-06    | 0.000214905 | Down |
| D | chr20 | <i>SNORA71D</i> | 0.059155411 | -4.079346047 | 6.79E-05    | 0.003247209 | Down |
| D | chr18 | <i>LOXHD1</i>   | 0.060662361 | -4.043054538 | 0.004467697 | 0.049991459 | Down |
| D | chr8  | <i>GRINA</i>    | 0.481998555 | -1.052899273 | 0.000498369 | 0.012222216 | Down |
| D | chr6  | <i>PHF1</i>     | 0.277352405 | -1.850207859 | 2.71E-07    | 5.35E-05    | Down |
| D | chr1  | <i>TTF2</i>     | 2.334579558 | 1.223162754  | 0.002248632 | 0.031993356 | Up   |
| D | chr5  | <i>ETF1</i>     | 1.701187949 | 0.76654254   | 0.002674255 | 0.036044429 | Up   |
| D | chr12 | <i>ORAI1</i>    | 0.407365424 | -1.29560456  | 0.003590434 | 0.04369813  | Down |
| D | chr11 | <i>DPAGT1</i>   | 0.481034749 | -1.05578698  | 0.001415659 | 0.024007286 | Down |
| D | chr13 | <i>TPP2</i>     | 1.842457043 | 0.881630983  | 0.000501546 | 0.012277045 | Up   |
| D | chr5  | <i>TCF7</i>     | 0.350553383 | -1.512293939 | 0.001805285 | 0.027742701 | Down |
| D | chr1  | <i>SYT2</i>     | 0           | #NAME?       | 0.001410593 | 0.023963554 | Down |
| D | chr1  | <i>SNORD21</i>  | 0.152506812 | -2.713054412 | 6.21E-09    | 2.71E-06    | Down |
| D | chr1  | <i>PTGER3</i>   | Inf         | Inf          | 0.002251709 | 0.032002225 | Up   |
| D | chr1  | <i>GRIK3</i>    | 0           | #NAME?       | 1.13E-06    | 0.000161961 | Down |
| D | chr17 | <i>IGFBP4</i>   | 0.494881363 | -1.014845384 | 0.00019139  | 0.006767101 | Down |
| D | chr19 | <i>NKPD1</i>    | 0.059707959 | -4.065932925 | 0.000611662 | 0.013976093 | Down |
| D | chr7  | <i>C7orf63</i>  | 0           | #NAME?       | 0.000180503 | 0.006545855 | Down |
| D | chr19 | <i>UBA52</i>    | 0.459948121 | -1.12045695  | 5.26E-06    | 0.000508422 | Down |
| D | chr18 | <i>RBBP8</i>    | 2.003506641 | 1.002527292  | 0.002938505 | 0.038139954 | Up   |
| D | chr19 | <i>SLC27A1</i>  | 0.292635035 | -1.772825593 | 3.79E-05    | 0.002121862 | Down |
| D | chr2  | <i>ANKRD39</i>  | 0.154659925 | -2.692828678 | 0.001245219 | 0.021954557 | Down |
| D | chr19 | <i>UBA2</i>     | 2.024536698 | 1.017591794  | 0.003016017 | 0.03884499  | Up   |
| D | chr8  | <i>EPPK1</i>    | 0.361896772 | -1.466349855 | 0.003667726 | 0.044221597 | Down |
| D | chr12 | <i>DUSP6</i>    | 0.482314705 | -1.051953297 | 0.000253982 | 0.008141768 | Down |
| D | chrX  | <i>SNORA69</i>  | 0.165739113 | -2.593013992 | 0.000525425 | 0.012676406 | Down |
| D | chr16 | <i>RPL3L</i>    | 0.054130974 | -4.20740185  | 0.001643723 | 0.026113344 | Down |
| D | chr3  | <i>TMEM115</i>  | 0.459795948 | -1.120934344 | 0.002752043 | 0.036489745 | Down |
| D | chrX  | <i>EFNB1</i>    | 0.327390885 | -1.610913941 | 0.003021819 | 0.03888133  | Down |
| D | chr4  | <i>SLC4A4</i>   | 0.098956749 | -3.337058088 | 0.000180617 | 0.006545855 | Down |
| D | chr10 | <i>WAPAL</i>    | 1.917782344 | 0.939438993  | 0.0001157   | 0.004761954 | Up   |
| D | chr16 | <i>RNF166</i>   | 0.428885088 | -1.221336939 | 0.000732057 | 0.015627214 | Down |
| D | chr15 | <i>MEIS2</i>    | 0.045408885 | -4.460881587 | 6.65E-07    | 0.000106609 | Down |
| D | chr6  | <i>TUBB2B</i>   | 0.172672024 | -2.533893732 | 0.003206712 | 0.040345194 | Down |
| D | chr5  | <i>CDK7</i>     | 2.574109679 | 1.364073526  | 0.001151803 | 0.021047016 | Up   |
| D | chr19 | <i>GTF2F1</i>   | 2.323497101 | 1.216297845  | 0.000578271 | 0.013618595 | Up   |
| D | chr3  | <i>CHMP2B</i>   | 2.814606717 | 1.49293335   | 5.22E-05    | 0.002682987 | Up   |
| D | chr22 | <i>MED15</i>    | 0.409385775 | -1.288467122 | 0.000820119 | 0.016709663 | Down |
| D | chr2  | <i>SLC39A10</i> | 1.940320378 | 0.956294884  | 0.001039349 | 0.019624287 | Up   |
| D | chr12 | <i>DNM1L</i>    | 1.963520189 | 0.973442432  | 0.000191359 | 0.006767101 | Up   |
| D | chr6  | <i>LTB</i>      | 0.091448448 | -3.450897498 | 1.03E-05    | 0.000835388 | Down |
| D | chr9  | <i>RPS6</i>     | 1.751097303 | 0.808259252  | 0.001810606 | 0.027759073 | Up   |
| D | chr2  | <i>ARHGEF33</i> | 0.035103189 | -4.832254102 | 0.000315652 | 0.009245079 | Down |
| D | chr10 | <i>DUSP5</i>    | 0.314144394 | -1.670500261 | 0.000394026 | 0.010667311 | Down |

|   |       |                 |             |              |             |             |      |
|---|-------|-----------------|-------------|--------------|-------------|-------------|------|
| D | chr6  | <i>PHIP</i>     | 1.842113866 | 0.881362241  | 0.000305831 | 0.009172816 | Up   |
| D | chr13 | <i>UTP14C</i>   | 4.486503343 | 2.165591486  | 3.90E-06    | 0.000404329 | Up   |
| D | chr5  | <i>REEP5</i>    | 0.458728308 | -1.124288155 | 0.000281875 | 0.008677571 | Down |
| D | chr3  | <i>DOCK3</i>    | 0.293745536 | -1.767361166 | 0.003092998 | 0.039563084 | Down |
| D | chr12 | <i>HIST4H4</i>  | 0.038875866 | -4.684981392 | 4.81E-07    | 8.26E-05    | Down |
| D | chr13 | <i>CDK8</i>     | 2.053860562 | 1.03833824   | 0.000835649 | 0.016929686 | Up   |
| D | chr11 | <i>STIP1</i>    | 1.921838848 | 0.942487367  | 0.000584096 | 0.013706298 | Up   |
| D | chr11 | <i>PRKRIR</i>   | 5.688473659 | 2.508041598  | 3.74E-06    | 0.000390566 | Up   |
| D | chr19 | <i>ZNF526</i>   | 0.237702932 | -2.072768398 | 8.17E-08    | 2.09E-05    | Down |
| D | chr9  | <i>ZDHC12</i>   | 0.138279816 | -2.854337511 | 0.004074249 | 0.047376763 | Down |
| D | chr7  | <i>PSMC2</i>    | 1.894802421 | 0.92204742   | 0.00395454  | 0.046543849 | Up   |
| D | chr13 | <i>TPT1</i>     | 0.57591329  | -0.79607648  | 0.000593867 | 0.01381138  | Down |
| D | chr17 | <i>BAHCC1</i>   | 0.311960954 | -1.680562627 | 6.70E-07    | 0.000106609 | Down |
| D | chr2  | <i>MRPL19</i>   | 4.888626256 | 2.289429113  | 7.12E-05    | 0.003315112 | Up   |
| D | chr1  | <i>RNF2</i>     | 1.818303554 | 0.862593068  | 0.002701582 | 0.036254777 | Up   |
| D | chr3  | <i>H1FX</i>     | 0.081376338 | -3.619246829 | 1.11E-07    | 2.58E-05    | Down |
| D | chr17 | <i>JUP</i>      | 0.38745136  | -1.367912885 | 0.001612239 | 0.025841374 | Down |
| D | chr17 | <i>FAM134C</i>  | 0.468845934 | -1.092814174 | 0.000189909 | 0.006767101 | Down |
| D | chr11 | <i>ZNF143</i>   | 2.561316912 | 1.356885769  | 0.000226441 | 0.007479427 | Up   |
| D | chr11 | <i>NRGN</i>     | 0.278826226 | -1.842561828 | 4.05E-05    | 0.002192926 | Down |
| D | chr4  | <i>LAP3</i>     | 2.927724093 | 1.549779601  | 0.000435018 | 0.011306124 | Up   |
| D | chr7  | <i>LRCH4</i>    | 0.325645048 | -1.618627808 | 1.01E-08    | 4.10E-06    | Down |
| D | chr14 | <i>LRP10</i>    | 0.441862625 | -1.178330189 | 2.62E-05    | 0.001620193 | Down |
| D | chrX  | <i>ZXDB</i>     | 0.245065572 | -2.028760271 | 0.004282823 | 0.04867421  | Down |
| D | chr2  | <i>RNU4ATAC</i> | 0.115873061 | -3.109382893 | 0.002375225 | 0.033073171 | Down |
| D | chr2  | <i>EML4</i>     | 1.798156105 | 0.846518272  | 0.001024325 | 0.019453237 | Up   |
| D | chr19 | <i>MBOAT7</i>   | 0.479848339 | -1.059349596 | 0.000995683 | 0.019132063 | Down |
| D | chr7  | <i>TSC22D4</i>  | 0.46123333  | -1.116431324 | 8.15E-05    | 0.003730261 | Down |
| D | chr16 | <i>SH2B1</i>    | 0.352182868 | -1.505603365 | 1.68E-07    | 3.53E-05    | Down |
| D | chr11 | <i>CARNS1</i>   | 0.260728914 | -1.939377512 | 0.000475282 | 0.011924997 | Down |
| D | chr15 | <i>VPS18</i>    | 0.487446618 | -1.036683861 | 0.000659176 | 0.014713904 | Down |
| D | chr9  | <i>GKAP1</i>    | 15.36236317 | 3.941328255  | 1.61E-06    | 0.000203935 | Up   |
| D | chr19 | <i>MIDN</i>     | 0.230153047 | -2.119334553 | 0.000464407 | 0.011788157 | Down |
| D | chr19 | <i>ZNF556</i>   | 7.585217241 | 2.9231905    | 0.00396869  | 0.046648192 | Up   |
| D | chr10 | <i>FZD8</i>     | 0.098288928 | -3.346827274 | 0.000220884 | 0.00737051  | Down |
| D | chr2  | <i>ODC1</i>     | 1.843529156 | 0.882470233  | 0.002728881 | 0.036423816 | Up   |
| D | chr15 | <i>KATNBL1</i>  | 3.154521075 | 1.657420989  | 0.002244414 | 0.031968204 | Up   |
| D | chr1  | <i>RUNX3</i>    | 0.292015104 | -1.775885102 | 0.000529144 | 0.012714068 | Down |
| D | chr10 | <i>HELLS</i>    | 2.094023002 | 1.06627729   | 0.001808879 | 0.027759073 | Up   |
| D | chr18 | <i>VPS4B</i>    | 1.827630873 | 0.869974719  | 0.00219935  | 0.031602331 | Up   |
| D | chr1  | <i>PHC2</i>     | 0.494951883 | -1.014639814 | 0.001582438 | 0.025622886 | Down |
| D | chr7  | <i>FLJ40852</i> | 0.026327392 | -5.247291601 | 1.95E-08    | 6.19E-06    | Down |
| D | chr16 | <i>VPS35</i>    | 1.89030023  | 0.918615391  | 0.0016445   | 0.026113344 | Up   |
| D | chr14 | <i>RNF31</i>    | 0.434371201 | -1.202999641 | 9.08E-05    | 0.004043132 | Down |

|   |       |                  |             |              |             |             |      |
|---|-------|------------------|-------------|--------------|-------------|-------------|------|
| D | chr7  | <i>MPP6</i>      | 2.181738152 | 1.125477962  | 3.17E-05    | 0.001860143 | Up   |
| D | chr5  | <i>RASGRF2</i>   | 0.081196461 | -3.62243935  | 0.001010108 | 0.019323873 | Down |
| D | chr4  | <i>KIAA1239</i>  | 0.015044224 | -6.054646523 | 0.000191188 | 0.006767101 | Down |
| D | chr1  | <i>HIST3H2BB</i> | 0.359373319 | -1.476444792 | 0.001759664 | 0.027304571 | Down |
| D | chr1  | <i>JUN</i>       | 0.474145527 | -1.07659817  | 0.003798937 | 0.045347423 | Down |
| D | chr2  | <i>SEMA4C</i>    | 0.33987655  | -1.55691727  | 0.001912594 | 0.0288815   | Down |
| D | chr19 | <i>ZNF569</i>    | 2.620218713 | 1.38968724   | 0.00201773  | 0.02988118  | Up   |
| D | chr15 | <i>SLC30A4</i>   | 2.427280713 | 1.279340964  | 0.003716746 | 0.044529282 | Up   |
| D | chr3  | <i>PSMD6</i>     | 2.11263375  | 1.07904268   | 0.002278757 | 0.032281155 | Up   |
| D | chr14 | <i>VRK1</i>      | 2.366964803 | 1.243038253  | 0.000175795 | 0.006458144 | Up   |
| D | chr9  | <i>SPTAN1</i>    | 1.713178818 | 0.776675745  | 0.001620234 | 0.025886259 | Up   |
| D | chr11 | <i>NRXN2</i>     | 0.019147194 | -5.70672322  | 0.000335989 | 0.00969834  | Down |
| D | chr15 | <i>SERF2</i>     | 0.552782925 | -0.855215041 | 0.000411983 | 0.010960444 | Down |
| D | chr19 | <i>ZNF574</i>    | 0.42982622  | -1.218174603 | 0.000337959 | 0.009733661 | Down |
| D | chr19 | <i>ZNF579</i>    | 0.258489624 | -1.951821727 | 0.004153711 | 0.047708039 | Down |
| D | chr17 | <i>FAM171A2</i>  | 0.165297393 | -2.596864121 | 1.64E-05    | 0.00118566  | Down |
| D | chr6  | <i>PPP1R10</i>   | 0.58726192  | -0.767924003 | 0.002360565 | 0.032920652 | Down |
| D | chr6  | <i>PPP1R18</i>   | 0.394415151 | -1.342213122 | 4.24E-05    | 0.002249598 | Down |
| D | chrX  | <i>CYBB</i>      | 2.253952153 | 1.17245689   | 0.002561656 | 0.035107067 | Up   |
| D | chr10 | <i>TM9SF3</i>    | 1.811463025 | 0.857155359  | 0.003162583 | 0.040060403 | Up   |
| D | chr21 | <i>RRP1B</i>     | 2.293478277 | 1.197537243  | 0.002042342 | 0.030143028 | Up   |
| D | chr1  | <i>HIST3H2A</i>  | 0.20613649  | -2.278328184 | 2.71E-06    | 0.000301916 | Down |
| D | chr7  | <i>FIGNL1</i>    | 2.822427915 | 1.496936735  | 0.000192523 | 0.006770462 | Up   |
| D | chr8  | <i>PHF20L1</i>   | 1.761966846 | 0.817186778  | 0.001194367 | 0.021493665 | Up   |
| D | chr15 | <i>CLN6</i>      | 0.41700068  | -1.261878357 | 0.00067008  | 0.014792784 | Down |
| D | chr11 | <i>SBF2</i>      | 0.374104643 | -1.418486225 | 0.003283132 | 0.041069055 | Down |
| D | chr1  | <i>SF3A3</i>     | 2.047111366 | 1.033589589  | 0.000873622 | 0.017401744 | Up   |
| D | chr2  | <i>TTN</i>       | 0.415519437 | -1.26701213  | 0.000490965 | 0.012101672 | Down |
| D | chr5  | <i>MCTP1</i>     | 1.923354734 | 0.943624871  | 0.0005156   | 0.012519552 | Up   |
| D | chr17 | <i>BLMH</i>      | 1.951189119 | 0.964353618  | 0.000396651 | 0.010714102 | Up   |
| D | chr19 | <i>BBC3</i>      | 0.189145096 | -2.402434727 | 0.001391331 | 0.023791215 | Down |
| D | chr4  | <i>C4orf27</i>   | 2.252998186 | 1.171846152  | 0.000751735 | 0.015793703 | Up   |
| D | chr20 | <i>MKKS</i>      | 2.92700795  | 1.549426664  | 0.002939887 | 0.038139954 | Up   |
| D | chr16 | <i>FBRS</i>      | 0.328696875 | -1.605170352 | 0.000176217 | 0.006458144 | Down |
| D | chr19 | <i>LTBP4</i>     | 0.046397977 | -4.429794272 | 0.000304903 | 0.009166072 | Down |
| D | chr21 | <i>USP25</i>     | 1.659925137 | 0.731118177  | 0.004352643 | 0.048955976 | Up   |
| D | chr3  | <i>BSN</i>       | 0.452189314 | -1.145001195 | 0.000162537 | 0.006058916 | Down |
| D | chr13 | <i>KLF5</i>      | 0.135327434 | -2.885473756 | 0.003430294 | 0.042283084 | Down |
| D | chr10 | <i>PCDH15</i>    | 0.05132969  | -4.284062638 | 0.001395845 | 0.023818513 | Down |
| D | chr2  | <i>EPHA4</i>     | 0.238176284 | -2.069898327 | 0.001698    | 0.026723523 | Down |
| D | chr1  | <i>SF3B4</i>     | 0.492238963 | -1.022569236 | 0.003680893 | 0.04426232  | Down |
| D | chr8  | <i>HOOK3</i>     | 2.198177006 | 1.136307563  | 0.000114268 | 0.004717899 | Up   |
| D | chr12 | <i>RFX4</i>      | 0.048772506 | -4.357788094 | 7.14E-05    | 0.003315112 | Down |
| D | chr17 | <i>TP53</i>      | 0.505711255 | -0.983614209 | 0.001221193 | 0.021706959 | Down |

|   |       |                     |             |              |             |             |      |
|---|-------|---------------------|-------------|--------------|-------------|-------------|------|
| D | chr7  | <i>CCT6P3</i>       | 7.795836373 | 2.96270381   | 0.004320129 | 0.048758406 | Up   |
| D | chr5  | <i>NSUN2</i>        | 2.026816026 | 1.019215141  | 0.000126724 | 0.005056174 | Up   |
| D | chr1  | <i>TPR</i>          | 1.963355887 | 0.973321706  | 6.60E-05    | 0.003167826 | Up   |
| D | chr7  | <i>TPK1</i>         | 0.358301297 | -1.480754827 | 0.002757826 | 0.03652929  | Down |
| D | chr9  | <i>ERCC6L2</i>      | 2.281127084 | 1.189746823  | 0.001374262 | 0.023654343 | Up   |
| D | chr19 | <i>LPHN1</i>        | 0.485310199 | -1.043020917 | 0.000805784 | 0.016556014 | Down |
| D | chr12 | <i>ACVRL1</i>       | 0.175562427 | -2.509943973 | 0.003025829 | 0.038894577 | Down |
| D | chr17 | <i>HDAC5</i>        | 0.513592507 | -0.961303939 | 0.001068206 | 0.019938315 | Down |
| D | chr15 | <i>CLPX</i>         | 1.847247855 | 0.885377454  | 0.002020326 | 0.02988571  | Up   |
| D | chr7  | <i>GATAD1</i>       | 2.09915473  | 1.069808512  | 0.001937396 | 0.029154792 | Up   |
| D | chr19 | <i>MYADM</i>        | 0.124883646 | -3.001343535 | 0.002091073 | 0.030619785 | Down |
| D | chr1  | <i>HIST3H3</i>      | 0.194783939 | -2.360053372 | 4.57E-12    | 3.31E-09    | Down |
| D | chr8  | <i>LOC100500773</i> | 2.337844302 | 1.225178851  | 0.000776595 | 0.016134126 | Up   |
| D | chr1  | <i>HIST2H2AB</i>    | 0.31310477  | -1.675282608 | 1.06E-07    | 2.51E-05    | Down |
| D | chr1  | <i>ABCD3</i>        | 2.00961219  | 1.006917121  | 0.00152587  | 0.025200026 | Up   |
| D | chr8  | <i>ATP6V1H</i>      | 1.973281832 | 0.980597023  | 0.000648552 | 0.01456396  | Up   |
| D | chr12 | <i>RECQL</i>        | 3.643110951 | 1.865170933  | 0.00138937  | 0.023791215 | Up   |
| D | chr2  | <i>GLS</i>          | 1.929855728 | 0.948492999  | 0.000184239 | 0.006621933 | Up   |
| D | chr3  | <i>CMTM7</i>        | 0.479999598 | -1.058894897 | 1.99E-05    | 0.001345047 | Down |
| D | chr16 | <i>UBALD1</i>       | 0.248527191 | -2.008524392 | 3.43E-05    | 0.00194604  | Down |
| D | chr14 | <i>LRRC16B</i>      | 0.245824585 | -2.024298886 | 0.002166089 | 0.031366226 | Down |
| D | chr19 | <i>IER2</i>         | 0.252173378 | -1.987512116 | 0.000599265 | 0.013862774 | Down |
| D | chr12 | <i>RAP1B</i>        | 2.927770826 | 1.54980263   | 1.24E-05    | 0.000929414 | Up   |
| D | chr6  | <i>TFAP2A</i>       | 0.01985508  | -5.654348016 | 1.54E-06    | 0.000199433 | Down |
| D | chr11 | <i>IPO7</i>         | 1.944412827 | 0.959334556  | 0.000316743 | 0.009245079 | Up   |
| D | chr1  | <i>HIST2H2BE</i>    | 0.342332788 | -1.546528616 | 0.000339704 | 0.009762382 | Down |
| D | chr11 | <i>ZBTB16</i>       | 0.486572534 | -1.03927321  | 0.002834925 | 0.037210531 | Down |
| D | chr9  | <i>TMEM2</i>        | 2.454504665 | 1.295431909  | 0.000400003 | 0.010738348 | Up   |
| D | chr14 | <i>UNC79</i>        | 0.069139908 | -3.854337511 | 0.000125181 | 0.005021883 | Down |
| D | chr2  | <i>TUBA3D</i>       | 0.168735516 | -2.567164425 | 0.003418566 | 0.042229338 | Down |
| D | chr11 | <i>APLNR</i>        | 0           | #NAME?       | 0.000530793 | 0.012730242 | Down |
| D | chr1  | <i>HOOK1</i>        | 2.156478225 | 1.108677149  | 0.002710594 | 0.036271911 | Up   |
| D | chr2  | <i>PTPN4</i>        | 1.919725029 | 0.940899682  | 0.000901531 | 0.017848677 | Up   |
| D | chrX  | <i>ZDHHC15</i>      | 0.457691607 | -1.127552259 | 0.002624357 | 0.035666652 | Down |
| D | chr9  | <i>PTPRD</i>        | 0.252533712 | -1.985452103 | 0.000955078 | 0.018710069 | Down |
| D | chr6  | <i>FBXO30</i>       | 2.380958173 | 1.251542277  | 0.000663124 | 0.014713904 | Up   |
| D | chr17 | <i>ADAM11</i>       | 0.158642508 | -2.656148704 | 3.84E-08    | 1.09E-05    | Down |
| D | chr9  | <i>PLAA</i>         | 1.827634849 | 0.869977857  | 0.00098514  | 0.019041663 | Up   |
| D | chr9  | <i>ZBTB6</i>        | 2.756543935 | 1.462860596  | 9.89E-05    | 0.004287108 | Up   |
| D | chr10 | <i>MRPS16</i>       | 0.362382047 | -1.464416613 | 0.001574188 | 0.025609012 | Down |
| D | chr5  | <i>PTCD2</i>        | 8.655701803 | 3.113650798  | 0.000106061 | 0.004522161 | Up   |
| D | chr17 | <i>MAPT</i>         | 0.074634949 | -3.74400483  | 0.001002363 | 0.019232099 | Down |
| D | chr3  | <i>SLC35G2</i>      | 0.241894275 | -2.047551471 | 0.001762125 | 0.027304571 | Down |
| D | chr12 | <i>OSBPL8</i>       | 1.813962134 | 0.85914434   | 0.000598856 | 0.013862774 | Up   |

|   |       |                  |             |              |             |             |      |
|---|-------|------------------|-------------|--------------|-------------|-------------|------|
| D | chr1  | <i>KIRREL</i>    | 0.05822308  | -4.102265024 | 3.81E-05    | 0.002126658 | Down |
| D | chr6  | <i>RXR8</i>      | 0.51224551  | -0.965092661 | 0.000488835 | 0.012079226 | Down |
| D | chr12 | <i>MFSD5</i>     | 0.422378358 | -1.243392181 | 0.002561297 | 0.035107067 | Down |
| D | chr13 | <i>EXOSC8</i>    | 2.206873535 | 1.142003958  | 0.001645219 | 0.026113344 | Up   |
| D | chr2  | <i>HNMT</i>      | 17.57386406 | 4.135359534  | 0.000151551 | 0.005798504 | Up   |
| D | chr8  | <i>UBE2W</i>     | 1.889608202 | 0.918087132  | 0.002211675 | 0.031709588 | Up   |
| D | chr11 | <i>MTRNR2L8</i>  | 0.22536462  | -2.149667048 | 7.59E-09    | 3.19E-06    | Down |
| D | chrX  | <i>MTRNR2L10</i> | 0.147699935 | -2.759258907 | 1.71E-25    | 5.58E-22    | Down |
| D | chr9  | <i>FKTN</i>      | 3.871444371 | 1.952871912  | 0.002797287 | 0.036939474 | Up   |
| D | chr14 | <i>CYP46A1</i>   | 0.016201472 | -5.947731319 | 0.000271183 | 0.008464399 | Down |
| D | chr7  | <i>ING3</i>      | 2.125782343 | 1.087993888  | 0.000909391 | 0.017973878 | Up   |
| D | chr12 | <i>CCDC38</i>    | 0           | #NAME?       | 0.000154593 | 0.00583473  | Down |
| D | chr4  | <i>FAT1</i>      | 0.062707507 | -3.995218014 | 0.000683363 | 0.015035145 | Down |
| D | chr8  | <i>FAM83H</i>    | 0.096574442 | -3.372214749 | 0.000453613 | 0.011604493 | Down |
| D | chr2  | <i>MPP4</i>      | 0           | #NAME?       | 0.001766948 | 0.027332254 | Down |
| D | chr5  | <i>ANKRD32</i>   | 1.82304786  | 0.866352437  | 0.004342468 | 0.048925891 | Up   |
| D | chr11 | <i>DDX10</i>     | 1.993662879 | 0.995421476  | 0.002097447 | 0.030678692 | Up   |
| D | chr1  | <i>CCT3</i>      | 2.383857828 | 1.253298197  | 0.000304857 | 0.009166072 | Up   |
| D | chr16 | <i>COX6A2</i>    | 0.09214587  | -3.439936679 | 0.002195554 | 0.031582571 | Down |
| D | chr7  | <i>RBM28</i>     | 2.275467556 | 1.186163016  | 0.000661803 | 0.014713904 | Up   |
| D | chr17 | <i>SAMD14</i>    | 0.234698504 | -2.091119448 | 0.00120489  | 0.021617888 | Down |
| D | chr17 | <i>PTRF</i>      | 0.309410674 | -1.692405128 | 0.001958819 | 0.029334612 | Down |
| D | chrX  | <i>TRO</i>       | 0.155503462 | -2.684981392 | 0.002318085 | 0.032625732 | Down |
| D | chr17 | <i>DDX52</i>     | 2.780493152 | 1.475340784  | 7.70E-06    | 0.00065248  | Up   |
| D | chr1  | <i>PRPF38A</i>   | 3.167001242 | 1.663117433  | 0.000101175 | 0.004370956 | Up   |
| D | chr10 | <i>SMC3</i>      | 1.920639905 | 0.941587057  | 0.000194851 | 0.006833913 | Up   |
| D | chr19 | <i>EPOR</i>      | 0.173935134 | -2.523378713 | 0.004244789 | 0.048495408 | Down |
| D | chr4  | <i>NUP54</i>     | 2.332442051 | 1.221841238  | 0.000144124 | 0.005596391 | Up   |
| D | chr19 | <i>PSENFEN</i>   | 0.472232988 | -1.082429269 | 0.000447419 | 0.01155936  | Down |
| D | chr17 | <i>MRPL45</i>    | 3.460279132 | 1.790888421  | 0.001349163 | 0.023407614 | Up   |
| D | chr1  | <i>APH1A</i>     | 0.428764832 | -1.221741517 | 1.56E-06    | 0.00019953  | Down |
| D | chr12 | <i>PITPNM2</i>   | 0.457238749 | -1.128980424 | 0.002324295 | 0.032659254 | Down |
| D | chr17 | <i>SCN4A</i>     | 0           | #NAME?       | 7.88E-08    | 2.06E-05    | Down |
| D | chr2  | <i>PABPC1P2</i>  | 0.130797913 | -2.934588576 | 4.14E-07    | 7.30E-05    | Down |
| D | chr12 | <i>KIAA1033</i>  | 2.103399247 | 1.072722715  | 0.00037682  | 0.010375857 | Up   |
| D | chr12 | <i>SUDS3</i>     | 6.373018377 | 2.671976821  | 0.002204434 | 0.031640544 | Up   |
| D | chr2  | <i>AFTPH</i>     | 1.790027613 | 0.839981843  | 0.001573703 | 0.025609012 | Up   |
| D | chr2  | <i>RNPEPL1</i>   | 0.418730762 | -1.255905184 | 0.000608081 | 0.013967653 | Down |
| D | chr19 | <i>SPTBN4</i>    | 0.175581021 | -2.509791187 | 0.00436405  | 0.049042001 | Down |
| D | chr17 | <i>LINC00672</i> | 0.060662361 | -4.043054538 | 0.003331968 | 0.041560404 | Down |
| D | chr16 | <i>MTRNR2L4</i>  | 0.254158248 | -1.976201046 | 5.71E-05    | 0.002841875 | Down |
| D | chr2  | <i>LRPPRC</i>    | 3.186716253 | 1.672070566  | 2.29E-07    | 4.75E-05    | Up   |
| D | chr17 | <i>ITGB3</i>     | 0.43804591  | -1.190846015 | 0.002089809 | 0.030619785 | Down |
| D | chr11 | <i>PAX6</i>      | 0.324785842 | -1.62243935  | 0.002181767 | 0.031473683 | Down |

|   |       |                 |             |              |             |             |      |
|---|-------|-----------------|-------------|--------------|-------------|-------------|------|
| D | chr5  | <i>EFNA5</i>    | 0           | #NAME?       | 5.64E-06    | 0.000525975 | Down |
| D | chr13 | <i>NUFIP1</i>   | 4.022225389 | 2.007993927  | 0.000364584 | 0.010154526 | Up   |
| D | chr6  | <i>CDC5L</i>    | 1.856400468 | 0.892507966  | 0.000569353 | 0.013454204 | Up   |
| D | chr2  | <i>CNRIP1</i>   | 0.301645619 | -1.729073465 | 0.000711575 | 0.015473202 | Down |
| D | chr8  | <i>PTP4A3</i>   | 0.29752039  | -1.748939551 | 1.69E-08    | 5.90E-06    | Down |
| D | chr6  | <i>VTA1</i>     | 2.405441054 | 1.266301446  | 0.00136817  | 0.023601179 | Up   |
| D | chr10 | <i>NCOA4</i>    | 2.092981011 | 1.065559222  | 0.000334331 | 0.009671884 | Up   |
| D | chrX  | <i>ZNF674</i>   | 3.070429175 | 1.618440325  | 0.000647637 | 0.01456396  | Up   |
| D | chr17 | <i>TOP2A</i>    | 2.199255312 | 1.137015096  | 2.68E-06    | 0.000301681 | Up   |
| D | chr12 | <i>GRIN2B</i>   | 0           | #NAME?       | 0.001587347 | 0.025663092 | Down |
| D | chr3  | <i>HYAL3</i>    | 0.064957168 | -3.944367445 | 0.003398975 | 0.042074405 | Down |
| D | chr3  | <i>MASP1</i>    | 0.024386253 | -5.357788094 | 4.27E-05    | 0.002254949 | Down |
| D | chr19 | <i>MIER2</i>    | 8.015312649 | 3.002758796  | 0.003383353 | 0.041920807 | Up   |
| D | chr19 | <i>RFX1</i>     | 0.414229208 | -1.27149881  | 0.002223799 | 0.03181349  | Down |
| D | chr11 | <i>EIF1AD</i>   | 2.075060336 | 1.053153286  | 0.004166996 | 0.047773988 | Up   |
| D | chr14 | <i>NDRG2</i>    | 0.321525423 | -1.636995278 | 0.003114121 | 0.03960033  | Down |
| D | chr14 | <i>MIS18BP1</i> | 2.851962426 | 1.511954975  | 0.002238239 | 0.031915089 | Up   |
| D | chr9  | <i>ZNF658</i>   | Inf         | Inf          | 9.97E-08    | 2.41E-05    | Up   |
| D | chr8  | <i>PCM1</i>     | 1.912760563 | 0.93565629   | 0.000177159 | 0.0064745   | Up   |
| D | chr12 | <i>PA2G4</i>    | 1.89264926  | 0.92040708   | 0.002832437 | 0.037210531 | Up   |
| D | chr3  | <i>ABHD14B</i>  | 0.205030802 | -2.286087431 | 0.000135237 | 0.005330608 | Down |
| D | chrX  | <i>TFE3</i>     | 0.384757396 | -1.377979035 | 0.000263848 | 0.008365973 | Down |
| D | chr5  | <i>MYO10</i>    | 0.484458458 | -1.045555134 | 0.002971425 | 0.03849869  | Down |
| D | chr3  | <i>TMPRSS7</i>  | 0.11622907  | -3.10495715  | 6.10E-05    | 0.002968578 | Down |
| D | chr16 | <i>ATXN2L</i>   | 0.450114841 | -1.151634962 | 0.003097661 | 0.039583923 | Down |
| D | chr5  | <i>NOP16</i>    | 2.532814657 | 1.340741509  | 0.00323637  | 0.040626274 | Up   |
| D | chr1  | <i>C1QB</i>     | 0.136424961 | -2.873820461 | 0.002303535 | 0.032517898 | Down |
| D | chr10 | <i>IDI1</i>     | 7.409701297 | 2.889415385  | 0.000513413 | 0.0124972   | Up   |
| D | chr9  | <i>RMRP</i>     | 0.467186645 | -1.097929062 | 9.35E-05    | 0.004133141 | Down |
| D | chr11 | <i>TBC1D10C</i> | 0.374314926 | -1.417675516 | 1.09E-05    | 0.00087256  | Down |
| D | chr4  | <i>ANK2</i>     | 0.129103692 | -2.953397839 | 0.001130108 | 0.020796213 | Down |
| D | chr9  | <i>AGTPBP1</i>  | 2.043919056 | 1.031338063  | 0.002162577 | 0.031366226 | Up   |
| D | chr4  | <i>SH3TC1</i>   | 0.20000348  | -2.321902989 | 0.001022166 | 0.019453237 | Down |
| D | chrX  | <i>KIF4A</i>    | 2.134963693 | 1.094211536  | 0.002216442 | 0.031743044 | Up   |
| D | chr8  | <i>RNF19A</i>   | 2.276463558 | 1.186794364  | 0.000148926 | 0.005731676 | Up   |
| D | chr13 | <i>NAA16</i>    | 2.007597541 | 1.005470084  | 0.001115925 | 0.020597941 | Up   |
| D | chr12 | <i>CCDC91</i>   | Inf         | Inf          | 0.000639807 | 0.014442137 | Up   |
| D | chr3  | <i>ZNF148</i>   | 1.634833874 | 0.709144041  | 0.003936175 | 0.046436296 | Up   |
| D | chr11 | <i>MRPL11</i>   | 6.302812    | 2.655995631  | 0.000570259 | 0.013454204 | Up   |
| D | chr20 | <i>BLCAP</i>    | 0.467146407 | -1.098053325 | 0.001614557 | 0.025846784 | Down |
| D | chr8  | <i>PREX2</i>    | 8.094050784 | 3.016861901  | 0.0019525   | 0.029314457 | Up   |
| D | chr7  | <i>GUSB</i>     | 2.730167735 | 1.44898959   | 0.000810185 | 0.016594175 | Up   |
| D | chr2  | <i>GPN1</i>     | 2.364180582 | 1.241340236  | 0.002139966 | 0.031230577 | Up   |
| D | chr11 | <i>CUL5</i>     | 2.090336917 | 1.063735492  | 0.000149448 | 0.005734865 | Up   |

|   |       |                  |             |              |             |             |      |
|---|-------|------------------|-------------|--------------|-------------|-------------|------|
| D | chr5  | <i>EGR1</i>      | 0.166961647 | -2.582411359 | 3.22E-05    | 0.001874149 | Down |
| D | chrX  | <i>GLA</i>       | 24.42191433 | 4.610104387  | 3.03E-05    | 0.001806261 | Up   |
| D | chr15 | <i>BLM</i>       | 2.250040304 | 1.169950844  | 6.21E-05    | 0.003013037 | Up   |
| D | chr11 | <i>TMEM134</i>   | 0.408508096 | -1.291563424 | 0.003015518 | 0.03884499  | Down |
| D | chr2  | <i>SNORA80B</i>  | 0.029263503 | -5.094753688 | 6.96E-05    | 0.003290883 | Down |
| D | chr13 | <i>SNORA31</i>   | 0.145415235 | -2.781749669 | 1.10E-05    | 0.00087256  | Down |
| D | chr8  | <i>RBPMS</i>     | 0.463336429 | -1.109867979 | 0.000289552 | 0.008847277 | Down |
| D | chr6  | <i>TMEM63B</i>   | 0.385823041 | -1.373988793 | 6.41E-05    | 0.003083854 | Down |
| D | chr7  | <i>HEATR2</i>    | 0.258151777 | -1.953708567 | 0.003859432 | 0.045985391 | Down |
| D | chr9  | <i>POLR1E</i>    | 5.622135526 | 2.491118231  | 0.0005922   | 0.013797191 | Up   |
| D | chr1  | <i>ATP13A2</i>   | 0.37446173  | -1.417109812 | 1.35E-07    | 3.03E-05    | Down |
| D | chr9  | <i>SMC2</i>      | 1.923488255 | 0.94372502   | 0.001132524 | 0.020811321 | Up   |
| D | chr2  | <i>MYO3B</i>     | 0.098788728 | -3.33950975  | 0.000851512 | 0.017144565 | Down |
| D | chr14 | <i>SAMD4A</i>    | 0.100092896 | -3.320588514 | 0.000364555 | 0.010154526 | Down |
| D | chr5  | <i>FTMT</i>      | 0.05132969  | -4.284062638 | 0.001258611 | 0.022130863 | Down |
| D | chr2  | <i>SCARNA5</i>   | 0.128376539 | -2.961546526 | 8.69E-06    | 0.00071757  | Down |
| D | chr5  | <i>CANX</i>      | 2.009095961 | 1.006546474  | 0.000209736 | 0.007135938 | Up   |
| D | chr2  | <i>EEF1B2</i>    | 0.241647037 | -2.049026787 | 7.91E-10    | 3.97E-07    | Down |
| D | chr2  | <i>MCM6</i>      | 1.791907828 | 0.84149643   | 0.000486531 | 0.01207305  | Up   |
| D | chr1  | <i>IGSF3</i>     | 0.193148885 | -2.372214749 | 0.001870744 | 0.028315079 | Down |
| D | chr7  | <i>DNAJC2</i>    | 2.117189251 | 1.082150235  | 0.004019081 | 0.047079066 | Up   |
| D | chr1  | <i>IGSF8</i>     | 0.382192582 | -1.387628317 | 0.000809496 | 0.016594175 | Down |
| D | chr10 | <i>NSMCE4A</i>   | 2.303755483 | 1.203987599  | 0.000318978 | 0.00928951  | Up   |
| D | chr2  | <i>HIBCH</i>     | 3.311369549 | 1.727428024  | 0.001620991 | 0.025886259 | Up   |
| D | chr12 | <i>SCN8A</i>     | 0.006008774 | -7.378713574 | 1.73E-11    | 1.13E-08    | Down |
| D | chr15 | <i>LEO1</i>      | 2.591986048 | 1.374057953  | 0.000404998 | 0.010805736 | Up   |
| D | chr2  | <i>PIKFYVE</i>   | 1.94921836  | 0.962895717  | 0.000322695 | 0.009376838 | Up   |
| D | chr15 | <i>TMC3</i>      | 0.052692328 | -4.246263278 | 0.000561803 | 0.013326983 | Down |
| D | chr9  | <i>KLHL9</i>     | 1.654321327 | 0.726239483  | 0.004081376 | 0.047402629 | Up   |
| D | chr5  | <i>LSP1P3</i>    | 14.85548194 | 3.892923505  | 0.002003512 | 0.029772009 | Up   |
| D | chr15 | <i>FURIN</i>     | 0.343488121 | -1.541667889 | 2.56E-06    | 0.000290989 | Down |
| D | chr22 | <i>MFNG</i>      | 0.449237841 | -1.154448637 | 0.00069689  | 0.015281206 | Down |
| D | chr2  | <i>DES</i>       | 0.062707507 | -3.995218014 | 0.000981323 | 0.019017784 | Down |
| D | chr19 | <i>RPS16</i>     | 0.321284634 | -1.638076114 | 1.33E-06    | 0.000184706 | Down |
| D | chr2  | <i>ATG9A</i>     | 0.518695057 | -0.947041475 | 0.004011175 | 0.047062767 | Down |
| D | chr21 | <i>MORC3</i>     | 2.020534221 | 1.014736786  | 0.000200805 | 0.00698948  | Up   |
| D | chr8  | <i>NUDCD1</i>    | 2.076003699 | 1.053809014  | 0.001611949 | 0.025841374 | Up   |
| D | chr6  | <i>COL10A1</i>   | 0.316754409 | -1.658563394 | 0.000313422 | 0.009245079 | Down |
| D | chr11 | <i>LRFN4</i>     | 0.309229    | -1.693252471 | 0.004444308 | 0.049815197 | Down |
| D | chr2  | <i>MYT1L</i>     | 0           | #NAME?       | 4.12E-05    | 0.002213021 | Down |
| D | chr9  | <i>CNTLN</i>     | 2.073920063 | 1.052360288  | 0.001147202 | 0.021021839 | Up   |
| D | chr10 | <i>YME1L1</i>    | 1.900079792 | 0.926060004  | 0.004131829 | 0.047621886 | Up   |
| D | chr10 | <i>HNRNPA3P1</i> | 0.39821359  | -1.328385637 | 0.002547177 | 0.03498213  | Down |
| D | chr19 | <i>GRIK5</i>     | 0.236008895 | -2.083086863 | 0.000399371 | 0.010738348 | Down |

|   |       |                     |             |              |             |             |      |
|---|-------|---------------------|-------------|--------------|-------------|-------------|------|
| D | chr11 | <i>DSCAML1</i>      | 0.033364299 | -4.905551014 | 2.09E-05    | 0.001387281 | Down |
| D | chr2  | <i>NOP58</i>        | 2.207027525 | 1.142104623  | 0.000655469 | 0.014681234 | Up   |
| D | chr3  | <i>ZNF654</i>       | 2.049344834 | 1.035162761  | 0.000773238 | 0.016098458 | Up   |
| D | chr15 | <i>CTDSP2</i>       | 1.711397325 | 0.77517474   | 0.002065882 | 0.030456001 | Up   |
| D | chr15 | <i>CILP</i>         | 0.02537038  | -5.300711062 | 0.002325473 | 0.032659254 | Down |
| D | chrX  | <i>GABRA3</i>       | 0.039904777 | -4.647294711 | 0.00143215  | 0.024235104 | Down |
| D | chr19 | <i>ZNF728</i>       | Inf         | Inf          | 0.004300013 | 0.048712664 | Up   |
| D | chr4  | <i>PDS5A</i>        | 1.805264111 | 0.85220992   | 0.000417253 | 0.010997779 | Up   |
| D | chr5  | <i>PDLIM7</i>       | 0.341606193 | -1.549593964 | 0.001668384 | 0.026448853 | Down |
| D | chr6  | <i>SSR1</i>         | 1.892653587 | 0.920410379  | 0.000481433 | 0.012033069 | Up   |
| D | chr5  | <i>HSPA4</i>        | 1.824327237 | 0.867364535  | 0.001499582 | 0.024828738 | Up   |
| D | chr10 | <i>LOC100192204</i> | 0.084958558 | -3.557096902 | 5.60E-06    | 0.000525553 | Down |
| D | chr5  | <i>HSPA9</i>        | 2.12699548  | 1.088816967  | 0.000841866 | 0.017002817 | Up   |
| D | chr22 | <i>TXN2</i>         | 0.470933302 | -1.086405347 | 0.002997759 | 0.038724511 | Down |
| D | chr1  | <i>FAM189B</i>      | 0.325933659 | -1.617349751 | 0.001045749 | 0.019688156 | Down |
| D | chr9  | <i>GNA14</i>        | Inf         | Inf          | 0.002170135 | 0.031389966 | Up   |
| D | chr9  | <i>PCSK5</i>        | 0.060662361 | -4.043054538 | 0.002745175 | 0.036447268 | Down |
| D | chr4  | <i>CENPE</i>        | 2.388930863 | 1.256365102  | 0.00010866  | 0.00456634  | Up   |
| D | chr20 | <i>SLX4IP</i>       | 4.617468478 | 2.207102112  | 0.002649385 | 0.035820234 | Up   |
| D | chr12 | <i>NACA</i>         | 2.160589487 | 1.111424985  | 0.000449477 | 0.011589566 | Up   |
| D | chr16 | <i>GPR97</i>        | 0.39837632  | -1.3277962   | 0.001579373 | 0.025622886 | Down |
| D | chr8  | <i>EPHX2</i>        | 0.060662361 | -4.043054538 | 0.003636706 | 0.044055806 | Down |
| D | chr11 | <i>CCDC88B</i>      | 0.337232624 | -1.568183985 | 0.000316238 | 0.009245079 | Down |
| D | chr5  | <i>ERAP1</i>        | 1.999632656 | 0.999734993  | 0.000102863 | 0.004400188 | Up   |
| D | chr14 | <i>NOVA1</i>        | 0.098956749 | -3.337058088 | 0.002703994 | 0.036254777 | Down |
| D | chr14 | <i>PPP1R36</i>      | 0.019027785 | -5.715748561 | 0.000451177 | 0.011604378 | Down |
| D | chr5  | <i>CAST</i>         | 3.05910701  | 1.613110575  | 0.000602736 | 0.01390562  | Up   |
| D | chr17 | <i>SCO1</i>         | 6.935157477 | 2.793928642  | 0.000216994 | 0.007315565 | Up   |
| D | chr15 | <i>RPLP1</i>        | 0.264595002 | -1.918142284 | 5.98E-08    | 1.59E-05    | Down |
| D | chr1  | <i>CSDE1</i>        | 1.773114791 | 0.826285939  | 0.001974286 | 0.029471978 | Up   |
| D | chr6  | <i>TDP2</i>         | 2.379175535 | 1.250461717  | 0.000279138 | 0.008630118 | Up   |
| D | chr1  | <i>CENPF</i>        | 2.308013215 | 1.206651484  | 0.000390224 | 0.01060677  | Up   |
| D | chr19 | <i>ZNF296</i>       | 0.22471247  | -2.153847911 | 0.001723796 | 0.026902358 | Down |
| D | chr4  | <i>NAF1</i>         | 2.365094573 | 1.241897874  | 0.003128882 | 0.039749291 | Up   |
| D | chr14 | <i>SNW1</i>         | 1.975044683 | 0.981885293  | 0.002862519 | 0.037497274 | Up   |
| D | chr12 | <i>CCNT1</i>        | 1.902347839 | 0.927781063  | 0.001582896 | 0.025622886 | Up   |
| D | chr9  | <i>FAM125B</i>      | 0.360983999 | -1.469993206 | 2.53E-05    | 0.001587891 | Down |
| D | chr1  | <i>SLC6A17</i>      | 0           | #NAME?       | 0.001688248 | 0.026636169 | Down |
| D | chr7  | <i>LOC100216545</i> | 0.296748084 | -1.75268938  | 0.001456423 | 0.024388751 | Down |
| D | chrX  | <i>CD99L2</i>       | Inf         | Inf          | 0.003468921 | 0.042576682 | Up   |
| D | chr16 | <i>ATP6VOC</i>      | 0.505903434 | -0.983066064 | 0.002229425 | 0.031859049 | Down |
| D | chr12 | <i>LTA4H</i>        | 1.787202505 | 0.837703113  | 0.001705556 | 0.026794934 | Up   |
| D | chr1  | <i>FAF1</i>         | 1.867896697 | 0.90141467   | 0.000507765 | 0.012406017 | Up   |
| D | chr19 | <i>DEDD2</i>        | 0.315001524 | -1.666569287 | 0.000121495 | 0.004938136 | Down |

|   |       |                 |             |              |             |             |      |
|---|-------|-----------------|-------------|--------------|-------------|-------------|------|
| D | chr1  | <i>DENND4B</i>  | 0.438750476 | -1.188527405 | 0.000207271 | 0.007109575 | Down |
| D | chr9  | <i>LHX2</i>     | 0.022833342 | -5.452714155 | 0.002023954 | 0.029905473 | Down |
| D | chr12 | <i>ST8SIA1</i>  | 0.175187222 | -2.513030547 | 1.53E-05    | 0.001115151 | Down |
| D | chr20 | <i>SNORD12</i>  | 0.297351308 | -1.749759674 | 0.002699793 | 0.036254777 | Down |
| D | chr2  | <i>ZNF513</i>   | 0.342123269 | -1.547411863 | 2.90E-05    | 0.001746174 | Down |
| D | chr3  | <i>ZBTB20</i>   | 0.529678196 | -0.916811974 | 0.000466462 | 0.011790233 | Down |
| D | chr2  | <i>PDIA6</i>    | 3.110184108 | 1.636999983  | 0.004019781 | 0.047079066 | Up   |
| D | chr15 | <i>HSP90B2P</i> | 1.965815756 | 0.975128113  | 0.003261218 | 0.040834086 | Up   |
| D | chr13 | <i>IPO5</i>     | 1.748785301 | 0.80635318   | 0.000980085 | 0.019017784 | Up   |
| D | chr11 | <i>PNPLA2</i>   | 0.455736572 | -1.133727946 | 0.00121557  | 0.021666032 | Down |
| D | chr15 | <i>SCAMP2</i>   | 0.494143839 | -1.016997041 | 0.00074564  | 0.015786445 | Down |
| D | chr7  | <i>PLXNA4</i>   | 0.286773657 | -1.80201559  | 0.000141926 | 0.005560679 | Down |
| D | chr5  | <i>CSF1R</i>    | 2.059122014 | 1.04202932   | 0.003110932 | 0.03960033  | Up   |
| D | chr7  | <i>PTPRZ1</i>   | 0.092795955 | -3.429794272 | 0.001435041 | 0.024252562 | Down |
| D | chr13 | <i>DIS3</i>     | 2.379694981 | 1.250776667  | 1.67E-05    | 0.001194728 | Up   |
| D | chr4  | <i>SDAD1</i>    | 1.919015632 | 0.940366464  | 0.003562763 | 0.043442402 | Up   |
| D | chr7  | <i>GIGYF1</i>   | 0.309155887 | -1.693593615 | 0.002498962 | 0.034428673 | Down |
| D | chr18 | <i>TTC39C</i>   | 4.878253616 | 2.286364764  | 0.000386821 | 0.010558259 | Up   |
| D | chr2  | <i>HAT1</i>     | 2.009889599 | 1.007116258  | 0.000751467 | 0.015793703 | Up   |
| D | chr1  | <i>IL6R</i>     | 0.078657174 | -3.668277842 | 1.84E-05    | 0.001274354 | Down |
| D | chr2  | <i>CDCA7</i>    | 1.941012477 | 0.956809392  | 0.001567659 | 0.025609012 | Up   |
| D | chr1  | <i>SH3BGRL3</i> | 0.367397358 | -1.444586843 | 1.69E-08    | 5.90E-06    | Down |
| D | chr19 | <i>ZNF787</i>   | 0.351154675 | -1.509821455 | 0.001558749 | 0.025548994 | Down |
| D | chr8  | <i>FAM91A1</i>  | 1.927892378 | 0.947024517  | 0.001416848 | 0.024007286 | Up   |
| D | chr2  | <i>HNRPLL</i>   | 1.843755194 | 0.882647114  | 0.001169822 | 0.02122763  | Up   |
| D | chr17 | <i>ACACA</i>    | 1.803674523 | 0.850939024  | 0.000671926 | 0.014808487 | Up   |
| D | chr17 | <i>CLTC</i>     | 1.603436874 | 0.681167557  | 0.004215164 | 0.048199161 | Up   |
| D | chr1  | <i>C1orf114</i> | Inf         | Inf          | 0.001942039 | 0.029190993 | Up   |
| D | chr6  | <i>POLH</i>     | 2.28240241  | 1.190553176  | 0.001116176 | 0.020597941 | Up   |
| D | chr4  | <i>PLK4</i>     | 2.153048941 | 1.106381114  | 0.000264823 | 0.008365973 | Up   |
| D | chr7  | <i>ETV1</i>     | 0.178832521 | -2.483318976 | 0.000170271 | 0.006311149 | Down |
| D | chrX  | <i>TTC3P1</i>   | Inf         | Inf          | 0.000419287 | 0.011029111 | Up   |
| D | chr5  | <i>LYSMD3</i>   | Inf         | Inf          | 5.59E-06    | 0.000525553 | Up   |
| D | chr19 | <i>FKRP</i>     | 0.295213847 | -1.7601677   | 0.000494253 | 0.012144096 | Down |
| D | chr19 | <i>SNORD33</i>  | 0.16004585  | -2.643442826 | 0.000354146 | 0.010022866 | Down |
| D | chr7  | <i>WDR91</i>    | 0.521245063 | -0.939966281 | 0.001712951 | 0.026797211 | Down |
| D | chrX  | <i>PLP2</i>     | 0.333391603 | -1.584710326 | 2.58E-05    | 0.001602081 | Down |
| D | chr1  | <i>FUBP1</i>    | 2.074876878 | 1.05302573   | 0.000224402 | 0.00744638  | Up   |
| D | chrX  | <i>MTMR1</i>    | 2.532895287 | 1.340787436  | 1.07E-05    | 0.000860404 | Up   |
| D | chr16 | <i>MON1B</i>    | 0.367383537 | -1.444641115 | 0.004312342 | 0.048712664 | Down |
| D | chr2  | <i>ST3GAL5</i>  | 0.29506924  | -1.760874562 | 0.002820247 | 0.037129928 | Down |
| D | chr20 | <i>TPX2</i>     | 1.893144514 | 0.920784544  | 0.003892633 | 0.046254261 | Up   |
| D | chr20 | <i>CSE1L</i>    | 1.653315813 | 0.725362331  | 0.003809133 | 0.045427565 | Up   |
| D | chr3  | <i>IL1RAP</i>   | 5.885727168 | 2.557220668  | 2.92E-06    | 0.000320281 | Up   |

|   |       |                  |             |              |             |             |      |
|---|-------|------------------|-------------|--------------|-------------|-------------|------|
| D | chr11 | <i>INTS4</i>     | 2.740508113 | 1.454443405  | 5.10E-06    | 0.000496239 | Up   |
| D | chr11 | <i>INTS5</i>     | 0.574475976 | -0.799681533 | 0.002730321 | 0.036423816 | Down |
| D | chr17 | <i>PSMC5</i>     | 2.149804794 | 1.104205667  | 0.000358686 | 0.010085738 | Up   |
| D | chr5  | <i>SKIV2L2</i>   | 1.733598434 | 0.793769755  | 0.002849213 | 0.037360484 | Up   |
| D | chr14 | <i>PSMA3</i>     | 1.838644747 | 0.878642757  | 0.002905381 | 0.037906511 | Up   |
| D | chr22 | <i>3-Sep</i>     | 0.195090023 | -2.357788094 | 0.00137651  | 0.023661834 | Down |
| D | chr7  | <i>MACC1</i>     | 0.141173388 | -2.824459935 | 0.000223722 | 0.007446182 | Down |
| D | chr3  | <i>RFC4</i>      | 1.950304743 | 0.963699568  | 0.003050069 | 0.039129055 | Up   |
| D | chr13 | <i>AKAP11</i>    | 1.911496173 | 0.934702312  | 0.000986881 | 0.019047095 | Up   |
| D | chr1  | <i>ZRANB2</i>    | 2.279908362 | 1.188975838  | 0.001710497 | 0.026797211 | Up   |
| D | chr19 | <i>CD37</i>      | 0.510849348 | -0.9690302   | 0.002259104 | 0.032072398 | Down |
| D | chr1  | <i>CCDC18</i>    | 4.141613152 | 2.050192805  | 2.54E-06    | 0.000290339 | Up   |
| D | chr4  | <i>SNORA26</i>   | 0.109738138 | -3.187863092 | 6.74E-06    | 0.000591621 | Down |
| D | chr11 | <i>SIDT2</i>     | 0.543964916 | -0.878414489 | 0.000668837 | 0.014790363 | Down |
| D | chr8  | <i>XKR6</i>      | 0.070206377 | -3.832254102 | 8.92E-07    | 0.000133711 | Down |
| D | chr19 | <i>SF3A2</i>     | 0.393259607 | -1.346446085 | 0.001471127 | 0.024544499 | Down |
| D | chr14 | <i>SLC7A8</i>    | 0.198954389 | -2.329490369 | 1.47E-07    | 3.15E-05    | Down |
| D | chr6  | <i>PEX6</i>      | 0.459900841 | -1.120605259 | 0.000416244 | 0.010993391 | Down |
| D | chr2  | <i>PSD4</i>      | 0.524640048 | -0.930600157 | 0.002395339 | 0.033211458 | Down |
| D | chr14 | <i>TMEM121</i>   | 0.169192707 | -2.563260714 | 0.001066517 | 0.019935308 | Down |
| D | chr1  | <i>COG2</i>      | 6.010502352 | 2.587485575  | 4.79E-05    | 0.002489964 | Up   |
| D | chrX  | <i>MPC1L</i>     | 0.054130974 | -4.20740185  | 0.000980187 | 0.019017784 | Down |
| D | chr20 | <i>EIF2S2</i>    | 2.508723552 | 1.326953502  | 0.002803419 | 0.036983016 | Up   |
| D | chr2  | <i>ROCK2</i>     | 1.688668314 | 0.755885983  | 0.002636348 | 0.035710093 | Up   |
| D | chr10 | <i>EBF3</i>      | 0           | #NAME?       | 2.76E-06    | 0.000305069 | Down |
| D | chr5  | <i>PAM</i>       | 1.902529405 | 0.927918751  | 0.001993254 | 0.0296872   | Up   |
| D | chr19 | <i>PLD3</i>      | 0.330110404 | -1.598979487 | 1.44E-05    | 0.001060995 | Down |
| D | chr12 | <i>HSP90B1</i>   | 2.782609634 | 1.476438531  | 0.000210025 | 0.007135938 | Up   |
| D | chr11 | <i>ACAD8</i>     | 3.089445648 | 1.627347993  | 0.000346053 | 0.009879557 | Up   |
| D | chr17 | <i>ABCA5</i>     | 0.153928631 | -2.699666491 | 7.14E-06    | 0.000620973 | Down |
| D | chr2  | <i>SGOL2</i>     | 6.156494482 | 2.622109112  | 0.003356497 | 0.041646614 | Up   |
| D | chrX  | <i>SUPT20HL2</i> | 0.009513892 | -6.715748561 | 9.45E-14    | 1.12E-10    | Down |
| D | chr1  | <i>ELAVL4</i>    | 0.06318574  | -3.984257195 | 0.00023015  | 0.007563629 | Down |
| D | chr16 | <i>ABCA3</i>     | 0.533616891 | -0.906123761 | 0.004126836 | 0.047621886 | Down |
| D | chr2  | <i>SOCS5</i>     | 0.463027286 | -1.110830882 | 0.004401978 | 0.049425647 | Down |
| D | chr3  | <i>KIF15</i>     | 2.386985367 | 1.255189723  | 8.76E-05    | 0.003939338 | Up   |
| D | chr1  | <i>AGBL4</i>     | 0           | #NAME?       | 0.001183929 | 0.021437632 | Down |
| D | chr10 | <i>ACSL5</i>     | 1.949860428 | 0.963370859  | 0.004131341 | 0.047621886 | Up   |
| D | chr6  | <i>C6orf170</i>  | 4.907460249 | 2.294976582  | 8.96E-05    | 0.004018689 | Up   |
| D | chr1  | <i>EPRS</i>      | 2.145199879 | 1.101112077  | 1.24E-05    | 0.000929414 | Up   |
| D | chr22 | <i>PLA2G6</i>    | 0.373113737 | -1.422312619 | 0.000109285 | 0.004570006 | Down |
| D | chr1  | <i>C1orf174</i>  | Inf         | Inf          | 0.004034393 | 0.0471233   | Up   |
| D | chrX  | <i>IQSEC2</i>    | 0.407605515 | -1.294754523 | 0.003925289 | 0.046395625 | Down |
| D | chr2  | <i>KIF1A</i>     | 0.226998388 | -2.139246043 | 0.001058806 | 0.01984804  | Down |

|   |       |                  |             |              |             |             |      |
|---|-------|------------------|-------------|--------------|-------------|-------------|------|
| D | chr2  | <i>CNTNAP5</i>   | 0.092411064 | -3.435790606 | 0.00040388  | 0.010805736 | Down |
| D | chr17 | <i>ABCC3</i>     | 0.252724735 | -1.984361222 | 0.004029528 | 0.047108644 | Down |
| D | chr16 | <i>SNORA46</i>   | 0.027139982 | -5.203436448 | 4.29E-09    | 2.07E-06    | Down |
| D | chr1  | <i>PIAS3</i>     | 0.410345983 | -1.285087266 | 0.000376957 | 0.010375857 | Down |
| D | chr5  | <i>FAM53C</i>    | 0.464710385 | -1.105596209 | 0.00015614  | 0.00585764  | Down |
| D | chr2  | <i>BUB1</i>      | 3.335539835 | 1.737920271  | 1.34E-06    | 0.000184706 | Up   |
| D | chrX  | <i>RRAGB</i>     | 2.198540112 | 1.136545854  | 0.002981761 | 0.038594276 | Up   |
| D | chr9  | <i>PIGO</i>      | 0.444987015 | -1.168164858 | 0.00272047  | 0.03636678  | Down |
| D | chr5  | <i>TENM2</i>     | 0.023102766 | -5.435790606 | 1.95E-05    | 0.001333045 | Down |
| D | chr16 | <i>SNORA50</i>   | 0.271487285 | -1.881043463 | 0.002386367 | 0.033157536 | Down |
| D | chr11 | <i>HBE1</i>      | 0.098956749 | -3.337058088 | 0.001196513 | 0.02150262  | Down |
| D | chr17 | <i>PKD2</i>      | 0.329098041 | -1.603410658 | 0.00012548  | 0.005021883 | Down |
| D | chr4  | <i>TENM3</i>     | 0.047788379 | -4.387196367 | 0.000153756 | 0.00583473  | Down |
| D | chr12 | <i>H2AFJ</i>     | 0.202745049 | -2.302261412 | 2.49E-13    | 2.71E-10    | Down |
| D | chr21 | <i>SIK1</i>      | 0.449066537 | -1.154998874 | 0.001458054 | 0.024388751 | Down |
| D | chr2  | <i>CCDC88A</i>   | 1.770289957 | 0.82398568   | 0.00346164  | 0.042567411 | Up   |
| D | chr2  | <i>SLC4A5</i>    | 0.036579379 | -4.772825593 | 0.000959396 | 0.018766486 | Down |
| D | chr9  | <i>HNRNPK</i>    | 1.675555239 | 0.744639249  | 0.002680834 | 0.036058593 | Up   |
| D | chr12 | <i>LOC400027</i> | 0.193148885 | -2.372214749 | 0.000804654 | 0.016556014 | Down |
| D | chr6  | <i>TTBK1</i>     | 0.26763393  | -1.901667068 | 0.003169472 | 0.040108728 | Down |
| D | chr17 | <i>CASKIN2</i>   | 0.281461062 | -1.828992745 | 1.76E-06    | 0.000218792 | Down |
| D | chr1  | <i>DHX9</i>      | 1.642891375 | 0.716237095  | 0.003296844 | 0.041201073 | Up   |
| D | chrX  | <i>FMR1</i>      | 1.929798375 | 0.948450123  | 0.000620253 | 0.01414763  | Up   |
| D | chr6  | <i>IBTK</i>      | 1.768356632 | 0.822409258  | 0.002781581 | 0.036769286 | Up   |
| D | chr2  | <i>PNO1</i>      | 3.620277609 | 1.85610033   | 3.29E-05    | 0.001905088 | Up   |
| D | chr7  | <i>KIAA1324L</i> | 6.999621785 | 2.80727697   | 0.001022985 | 0.019453237 | Up   |
| D | chr4  | <i>LEF1</i>      | 0.197766184 | -2.338132332 | 0.000242929 | 0.007864747 | Down |
| D | chr1  | <i>CEP350</i>    | 1.857089799 | 0.893043578  | 0.000394086 | 0.010667311 | Up   |
| D | chr1  | <i>ODF2L</i>     | 3.720269304 | 1.895407059  | 0.002361011 | 0.032920652 | Up   |
| D | chr12 | <i>RHEBL1</i>    | 0.326446557 | -1.615081271 | 0.002267107 | 0.032151032 | Down |
| D | chr2  | <i>KIF5C</i>     | 0.050648371 | -4.30334031  | 1.40E-06    | 0.000185762 | Down |
| D | chr15 | <i>ATP8B4</i>    | 2.346752714 | 1.230665828  | 2.00E-06    | 0.00024397  | Up   |
| D | chr1  | <i>CHD1L</i>     | 2.057185203 | 1.040671682  | 0.004250546 | 0.048518698 | Up   |
| D | chr17 | <i>TMC8</i>      | 0.254617746 | -1.973595123 | 0.000656025 | 0.014681234 | Down |
| D | chr20 | <i>RBL1</i>      | 1.8889726   | 0.917601775  | 0.000659786 | 0.014713904 | Up   |
| D | chr6  | <i>PAK1IP1</i>   | 3.787555597 | 1.921267066  | 0.000610722 | 0.013976093 | Up   |
| D | chr22 | <i>TTC28</i>     | 0.402293414 | -1.313679975 | 0.00018281  | 0.006588731 | Down |
| D | chr9  | <i>GRHPR</i>     | 0.309038215 | -1.694142844 | 0.002450559 | 0.033869109 | Down |
| D | chr10 | <i>IFIT2</i>     | 5.512990254 | 2.462835051  | 0.001819946 | 0.027804256 | Up   |
| D | chr19 | <i>ELAVL3</i>    | 0.072568282 | -3.784517065 | 0.000792686 | 0.0163642   | Down |
| D | chr6  | <i>SYNCRIP</i>   | 1.677567447 | 0.746370771  | 0.001801327 | 0.027714516 | Up   |
| D | chr2  | <i>METTL5</i>    | 3.841655469 | 1.94172814   | 5.75E-05    | 0.002851842 | Up   |
| D | chr2  | <i>PRPF40A</i>   | 2.034862269 | 1.024931148  | 5.33E-05    | 0.002708253 | Up   |
| D | chr1  | <i>DTL</i>       | 1.819368592 | 0.863437853  | 0.001544561 | 0.025348281 | Up   |

|   |       |                  |             |              |             |             |      |
|---|-------|------------------|-------------|--------------|-------------|-------------|------|
| D | chr1  | <i>QSOX1</i>     | 0.394529842 | -1.341793666 | 0.001572976 | 0.025609012 | Down |
| D | chrX  | <i>CNKSR2</i>    | 0.03805557  | -4.715748561 | 0.000313863 | 0.009245079 | Down |
| D | chr13 | <i>HS6ST3</i>    | 0           | #NAME?       | 8.65E-05    | 0.003909833 | Down |
| D | chr5  | <i>XRCC4</i>     | 5.046689044 | 2.335337196  | 0.000124296 | 0.005005201 | Up   |
| D | chr19 | <i>SCAF1</i>     | 0.359018255 | -1.477870892 | 0.000569866 | 0.013454204 | Down |
| D | chr3  | <i>TOMM70A</i>   | 2.14304757  | 1.099663874  | 0.000773644 | 0.016098458 | Up   |
| D | chr19 | <i>FZR1</i>      | 0.514305794 | -0.959301687 | 0.001127604 | 0.020779441 | Down |
| D | chr5  | <i>FST</i>       | 0.039491087 | -4.6623291   | 0.000267963 | 0.008408185 | Down |
| D | chr5  | <i>PCDHGA4</i>   | 0.178832521 | -2.483318976 | 0.000312662 | 0.009245079 | Down |
| D | chr8  | <i>ZNF703</i>    | 0.062073114 | -4.009887674 | 2.50E-08    | 7.58E-06    | Down |
| D | chr17 | <i>CDC27</i>     | 1.679897333 | 0.748373065  | 0.003190538 | 0.040258171 | Up   |
| D | chr19 | <i>ZNF426</i>    | 2.83484959  | 1.503272192  | 0.000748981 | 0.01578668  | Up   |
| D | chr12 | <i>SOAT2</i>     | 0.248017954 | -2.011483536 | 0.002741782 | 0.036447268 | Down |
| D | chr13 | <i>DNAJC3</i>    | 2.322973077 | 1.215972433  | 0.000134205 | 0.005324632 | Up   |
| D | chr19 | <i>LIN37</i>     | 0.427036731 | -1.227567927 | 0.004302044 | 0.048712664 | Down |
| D | chr3  | <i>KPNA1</i>     | 1.726141099 | 0.787550399  | 0.00282848  | 0.03720078  | Up   |
| D | chr17 | <i>ZBTB4</i>     | 0.449727597 | -1.15287668  | 0.000385867 | 0.01055432  | Down |
| D | chr1  | <i>DNTTIP2</i>   | 3.124154495 | 1.643465799  | 2.34E-05    | 0.001520336 | Up   |
| D | chr16 | <i>CBFA2T3</i>   | 0.2362948   | -2.081340214 | 0.003956245 | 0.046543849 | Down |
| D | chrX  | <i>TMEM164</i>   | 0.473967179 | -1.077140934 | 3.95E-05    | 0.002173266 | Down |
| D | chr16 | <i>CTCF</i>      | 1.718582337 | 0.781218972  | 0.001518636 | 0.025112354 | Up   |
| D | chr11 | <i>NUDT8</i>     | 0.209280082 | -2.256493083 | 0.001189475 | 0.021493665 | Down |
| D | chr2  | <i>ZC3H15</i>    | 2.068594725 | 1.048651023  | 0.001441028 | 0.024290822 | Up   |
| D | chr1  | <i>PLA2G4A</i>   | 1.88104234  | 0.911532323  | 0.002765815 | 0.036597957 | Up   |
| D | chr10 | <i>HHEX</i>      | 0.333233944 | -1.58539273  | 0.000108847 | 0.00456634  | Down |
| D | chr19 | <i>ARHGAP33</i>  | 0.303233939 | -1.721496859 | 2.42E-05    | 0.001539584 | Down |
| D | chr15 | <i>EDC3</i>      | 0.431032288 | -1.214132153 | 0.001225285 | 0.021750056 | Down |
| D | chr19 | <i>ZNF440</i>    | 10.00733726 | 3.32298625   | 0.000313063 | 0.009245079 | Up   |
| D | chr12 | <i>NUP37</i>     | 5.245641517 | 2.391119218  | 7.32E-06    | 0.000628076 | Up   |
| D | chr6  | <i>SENP6</i>     | 1.768163094 | 0.822251354  | 0.001342062 | 0.023315426 | Up   |
| D | chr5  | <i>SLU7</i>      | 2.0976114   | 1.068747432  | 0.003722836 | 0.044561319 | Up   |
| D | chr7  | <i>HOXA11</i>    | 0           | #NAME?       | 0.001102898 | 0.020439643 | Down |
| D | chr15 | <i>SNORD16</i>   | 0.249613997 | -2.002229261 | 0.000139275 | 0.005473272 | Down |
| D | chr9  | <i>CCL27</i>     | 0.063972814 | -3.966397251 | 0.000589329 | 0.013754868 | Down |
| D | chr15 | <i>UBE3A</i>     | 1.898930652 | 0.92518722   | 0.001292792 | 0.022559327 | Up   |
| D | chr4  | <i>HSP90AB2P</i> | 1.714820898 | 0.778057904  | 0.003611877 | 0.043836429 | Up   |
| D | chr1  | <i>SKI</i>       | 0.444554752 | -1.169566982 | 0.000937663 | 0.018396516 | Down |
| D | chr2  | <i>UGGT1</i>     | 1.68162778  | 0.749858407  | 0.003109398 | 0.03960033  | Up   |
| D | chr17 | <i>SPNS2</i>     | 0.414349771 | -1.27107897  | 6.89E-07    | 0.000108349 | Down |
| D | chr11 | <i>SIPA1</i>     | 0.454645019 | -1.137187549 | 9.03E-05    | 0.004034111 | Down |
| D | chr5  | <i>FAM174A</i>   | 5.944954707 | 2.571665819  | 0.000415977 | 0.010993391 | Up   |
| D | chr1  | <i>PYGO2</i>     | 0.333583221 | -1.58388137  | 0.00105282  | 0.019792718 | Down |
| D | chr4  | <i>IDUA</i>      | 0.351636278 | -1.507844175 | 0.003663159 | 0.044221597 | Down |
| D | chr11 | <i>PITPNM1</i>   | 0.388657444 | -1.363428948 | 3.86E-05    | 0.002145254 | Down |

|   |       |                 |             |              |             |             |      |
|---|-------|-----------------|-------------|--------------|-------------|-------------|------|
| D | chr16 | <i>RANBP10</i>  | 0.462166026 | -1.113516885 | 0.000261168 | 0.008310874 | Down |
| D | chr7  | <i>MET</i>      | 4.882611438 | 2.287652972  | 4.20E-07    | 7.30E-05    | Up   |
| D | chr7  | <i>KCNH2</i>    | 0.234376614 | -2.093099468 | 5.45E-05    | 0.002744137 | Down |
| D | chr16 | <i>SPNS1</i>    | 0.398772775 | -1.326361177 | 0.000586458 | 0.013737015 | Down |
| D | chr7  | <i>SNORA22</i>  | 0.06318574  | -3.984257195 | 3.97E-05    | 0.002175426 | Down |
| D | chr3  | <i>TRNT1</i>    | 3.50965506  | 1.811329245  | 0.00111041  | 0.020549672 | Up   |
| D | chr11 | <i>ZBTB3</i>    | 0.342747158 | -1.544783393 | 0.001239609 | 0.021914883 | Down |
| D | chr11 | <i>RBM14</i>    | 0.438633731 | -1.188911336 | 0.000307773 | 0.009209886 | Down |
| D | chr1  | <i>LPGAT1</i>   | 3.168602745 | 1.663846797  | 6.06E-06    | 0.000553295 | Up   |
| D | chr6  | <i>F13A1</i>    | 3.997776804 | 1.999197929  | 4.26E-06    | 0.000428023 | Up   |
| D | chrX  | <i>BHLHB9</i>   | 3.771600373 | 1.915176821  | 1.53E-06    | 0.000199433 | Up   |
| D | chr12 | <i>TMTC3</i>    | 2.79101558  | 1.480790178  | 0.000711455 | 0.015473202 | Up   |
| D | chr4  | <i>SRP72</i>    | 1.752269768 | 0.8092249    | 0.002927248 | 0.038139954 | Up   |
| D | chrX  | <i>SRPK3</i>    | 2.673630675 | 1.418800191  | 0.003155282 | 0.04004568  | Up   |
| D | chr17 | <i>SP2</i>      | 0.376359431 | -1.409816973 | 0.001448227 | 0.024380666 | Down |
| D | chr17 | <i>DVL2</i>     | 0.391342735 | -1.353495431 | 3.37E-05    | 0.001933714 | Down |
| D | chr1  | <i>PPP1R12B</i> | 0.416656756 | -1.263068721 | 0.002898014 | 0.037886156 | Down |
| D | chr11 | <i>ATG2A</i>    | 0.348325694 | -1.5214912   | 0.000420877 | 0.011048651 | Down |
| D | chr12 | <i>CMKLR1</i>   | 0.057083355 | -4.13078606  | 2.26E-05    | 0.001479909 | Down |
| D | chr17 | <i>DYNLL2</i>   | 0.332257642 | -1.589625714 | 1.45E-07    | 3.15E-05    | Down |
| D | chr22 | <i>SEC14L2</i>  | 0.206288176 | -2.277266961 | 0.003175244 | 0.040142839 | Down |
| D | chr2  | <i>SSB</i>      | 3.071538111 | 1.618961284  | 0.001409146 | 0.023963554 | Up   |
| D | chr20 | <i>TRMT6</i>    | 2.051070832 | 1.036377315  | 0.003476036 | 0.042623909 | Up   |
| D | chr17 | <i>SLC4A1</i>   | 0.062954869 | -3.989538229 | 5.79E-11    | 3.43E-08    | Down |
| D | chr1  | <i>CACHD1</i>   | 0.091530649 | -3.449601285 | 0.002636476 | 0.035710093 | Down |
| D | chr20 | <i>NFATC2</i>   | 0.248480303 | -2.008796602 | 2.21E-06    | 0.000262514 | Down |
| D | chr16 | <i>ACD</i>      | 0.305773638 | -1.709464062 | 0.001987543 | 0.029635975 | Down |
| D | chr8  | <i>EFR3A</i>    | 2.052467016 | 1.037359038  | 0.000122351 | 0.004957491 | Up   |
| D | chr19 | <i>ZFP36</i>    | 0.241597032 | -2.049325364 | 6.35E-06    | 0.000575613 | Down |
| D | chr7  | <i>FGL2</i>     | 2.735088869 | 1.45158771   | 0.000229317 | 0.007555314 | Up   |
| D | chr14 | <i>REC8</i>     | 0.220657229 | -2.180121085 | 0.001688366 | 0.026636169 | Down |
| D | chr6  | <i>SERPINB1</i> | 2.028920732 | 1.020712501  | 0.003654483 | 0.044189106 | Up   |
| D | chrX  | <i>MOSPD2</i>   | 4.440855212 | 2.150837535  | 1.50E-05    | 0.001098723 | Up   |
| D | chr1  | <i>RRP15</i>    | 4.050681859 | 2.01816478   | 0.002361748 | 0.032920652 | Up   |
| D | chr4  | <i>DHX15</i>    | 1.65289553  | 0.724995543  | 0.002406095 | 0.033325187 | Up   |
| D | chr10 | <i>GTPBP4</i>   | 1.898621433 | 0.924952274  | 0.004214324 | 0.048199161 | Up   |
| D | chr1  | <i>PDIK1L</i>   | 1.869840899 | 0.90291552   | 0.003161821 | 0.040060403 | Up   |
| D | chr14 | <i>FUT8</i>     | 2.297880711 | 1.200303906  | 1.37E-06    | 0.000185762 | Up   |
| D | chr7  | <i>SNORA5C</i>  | 0.16722002  | -2.580180515 | 3.14E-06    | 0.000338064 | Down |
| D | chr7  | <i>HOXA2</i>    | 0.314746551 | -1.667737527 | 0.000867313 | 0.017302487 | Down |
| D | chr7  | <i>HOXA3</i>    | 0.275881588 | -1.857878917 | 0.000247621 | 0.007977062 | Down |
| D | chr7  | <i>HOXA9</i>    | 0.171059974 | -2.547425867 | 5.51E-05    | 0.00276164  | Down |
| D | chr11 | <i>RBM4B</i>    | 0.461284208 | -1.116272191 | 2.38E-05    | 0.001536355 | Down |
| D | chr15 | <i>FAM169B</i>  | 0.117498215 | -3.089289261 | 0.003410425 | 0.042176127 | Down |

|   |       |                 |             |              |             |             |      |
|---|-------|-----------------|-------------|--------------|-------------|-------------|------|
| D | chr8  | <i>GFRA2</i>    | 0.074930187 | -3.738309129 | 0.000719844 | 0.015575135 | Down |
| D | chr18 | <i>C18orf54</i> | 17.76872122 | 4.151267952  | 0.000204434 | 0.007074941 | Up   |
| D | chr17 | <i>CHRN1</i>    | 0.279977598 | -1.836616697 | 3.60E-05    | 0.002022222 | Down |
| D | chr12 | <i>NFYB</i>     | 2.230973189 | 1.157673176  | 0.001530865 | 0.02525056  | Up   |
| D | chr10 | <i>ZRAN1</i>    | 1.968294003 | 0.976945731  | 0.000292541 | 0.008896942 | Up   |
| D | chr6  | <i>TMEM170B</i> | 2.846661288 | 1.509270843  | 0.000698723 | 0.015295696 | Up   |
| D | chr12 | <i>FBXL14</i>   | 0.309852995 | -1.690344182 | 9.45E-05    | 0.004133141 | Down |
| D | chr2  | <i>USP37</i>    | 1.716124074 | 0.779153862  | 0.003670543 | 0.044221597 | Up   |
| D | chr22 | <i>RNU12</i>    | 0.113913268 | -3.133992297 | 4.80E-31    | 2.09E-27    | Down |
| D | chr3  | <i>ATR</i>      | 1.750529    | 0.807790962  | 0.002634146 | 0.035710093 | Up   |
| D | chrX  | <i>PDHA1</i>    | 1.873162078 | 0.905475736  | 0.001184681 | 0.021437632 | Up   |
| D | chr4  | <i>NCAPG</i>    | 2.104879314 | 1.073737517  | 0.001605876 | 0.025841374 | Up   |
| D | chr3  | <i>GNAI2</i>    | 0.583053848 | -0.778298966 | 0.000725298 | 0.015627214 | Down |
| D | chr7  | <i>GRB10</i>    | 3.576426304 | 1.838518714  | 0.000217613 | 0.007317519 | Up   |
| D | chr20 | <i>SNORA51</i>  | 0.15608648  | -2.679582515 | 0.00014253  | 0.005567632 | Down |
| D | chr11 | <i>LRRC56</i>   | 0.071682568 | -3.802233866 | 0.001065798 | 0.019935308 | Down |
| D | chr7  | <i>BZW2</i>     | 1.881291238 | 0.911723206  | 0.00036924  | 0.010228177 | Up   |
| D | chr19 | <i>PIH1D1</i>   | 0.425807501 | -1.231726729 | 0.000961307 | 0.018775699 | Down |
| D | chr19 | <i>C19orf6</i>  | 0.462999618 | -1.11091709  | 7.50E-05    | 0.003458593 | Down |
| D | chr15 | <i>CHST14</i>   | 0.297761029 | -1.74777315  | 0.000864219 | 0.017267166 | Down |
| D | chr6  | <i>ME1</i>      | 0.083410747 | -3.583622919 | 2.86E-05    | 0.00174562  | Down |
| D | chr16 | <i>MC1R</i>     | 0           | #NAME?       | 7.02E-05    | 0.003305413 | Down |
| D | chr1  | <i>EBNA1BP2</i> | 3.439267361 | 1.782101272  | 0.002009363 | 0.029824982 | Up   |
| D | chr3  | <i>OGG1</i>     | 0.302281971 | -1.726033159 | 0.001164995 | 0.021199009 | Down |
| D | chr3  | <i>DHX36</i>    | 2.04747913  | 1.033848746  | 0.00026646  | 0.00839735  | Up   |
| D | chr2  | <i>TSSC1</i>    | 2.74653084  | 1.457610492  | 0.004306551 | 0.048712664 | Up   |
| D | chr16 | <i>SNN</i>      | 0.393876344 | -1.344185321 | 0.001706644 | 0.026794934 | Down |
| D | chr11 | <i>CHEK1</i>    | 2.118521466 | 1.083057747  | 0.001206993 | 0.021617888 | Up   |
| D | chr15 | <i>MYO5A</i>    | 1.935118321 | 0.952421782  | 0.00015624  | 0.00585764  | Up   |
| D | chr15 | <i>C15orf39</i> | 0.370495911 | -1.432470474 | 0.000201053 | 0.00698948  | Down |
| D | chr12 | <i>SNORA49</i>  | 0.117498215 | -3.089289261 | 0.002588066 | 0.035357585 | Down |
| D | chr15 | <i>BTBD1</i>    | 1.81507945  | 0.860032699  | 0.003358032 | 0.041646614 | Up   |
| D | chr9  | <i>SETX</i>     | 1.933377631 | 0.951123455  | 0.00027279  | 0.008494242 | Up   |
| D | chr1  | <i>SCARNA3</i>  | 0.046733505 | -4.419398948 | 9.94E-15    | 1.30E-11    | Down |
| D | chr1  | <i>SCARNA4</i>  | 0.043540969 | -4.521482659 | 3.28E-06    | 0.000347436 | Down |
| D | chr16 | <i>C16orf58</i> | 0.312703735 | -1.677131644 | 0.000232565 | 0.007596818 | Down |
| D | chr17 | <i>CACNB1</i>   | 0.221866299 | -2.172237553 | 1.15E-05    | 0.000885662 | Down |
| D | chr7  | <i>CUL1</i>     | 2.062442935 | 1.044354203  | 3.90E-05    | 0.00215357  | Up   |
| D | chr9  | <i>IARS</i>     | 1.974394307 | 0.98141014   | 0.000382995 | 0.010519878 | Up   |
| D | chr4  | <i>PPARGC1A</i> | 0.325457735 | -1.619457894 | 0.000861193 | 0.017233116 | Down |
| D | chr6  | <i>AGPAT1</i>   | 0.344819056 | -1.536088587 | 3.63E-06    | 0.000382191 | Down |
| D | chr1  | <i>SCAMP3</i>   | 0.31070803  | -1.686368569 | 4.41E-06    | 0.000439468 | Down |
| D | chr12 | <i>SNORA53</i>  | 0.327501266 | -1.61042761  | 0.000766266 | 0.016021596 | Down |
| D | chr2  | <i>C2orf44</i>  | 0.16004585  | -2.643442826 | 0.000283958 | 0.0086967   | Down |

|   |       |                  |             |              |             |             |      |
|---|-------|------------------|-------------|--------------|-------------|-------------|------|
| D | chr14 | <i>SNORD8</i>    | 0.229245239 | -2.125036324 | 8.26E-06    | 0.000686348 | Down |
| D | chrX  | <i>GUCY2F</i>    | 0           | #NAME?       | 0.000366089 | 0.010162485 | Down |
| D | chr6  | <i>HIST1H2AG</i> | 0.169388741 | -2.561590109 | 5.27E-05    | 0.002685809 | Down |
| D | chr6  | <i>HIST1H2AI</i> | 0.228507519 | -2.12968646  | 6.22E-09    | 2.71E-06    | Down |
| D | chr6  | <i>CASP8AP2</i>  | 2.086111172 | 1.060816043  | 0.00025532  | 0.008164241 | Up   |
| D | chr17 | <i>MIR142</i>    | 0.131912934 | -2.922342071 | 5.79E-13    | 5.81E-10    | Down |
| D | chr1  | <i>EDEM3</i>     | 1.880996809 | 0.911497401  | 0.00088166  | 0.017481781 | Up   |
| D | chr14 | <i>NIN</i>       | 2.081986597 | 1.057960782  | 0.000108132 | 0.00456568  | Up   |
| D | chr9  | <i>UCK1</i>      | 0.400195559 | -1.321222938 | 0.001644406 | 0.026113344 | Down |
| D | chr11 | <i>FAM111A</i>   | 5.348345458 | 2.419092654  | 4.13E-06    | 0.000417796 | Up   |
| D | chr3  | <i>RNF123</i>    | 0.536912166 | -0.897242    | 0.001036772 | 0.019604008 | Down |
| D | chr3  | <i>TTC21A</i>    | 0.1326482   | -2.914322993 | 0.001018315 | 0.01945236  | Down |
| D | chr8  | <i>TAF2</i>      | 1.764397793 | 0.819175861  | 0.003421201 | 0.042229338 | Up   |
| D | chr11 | <i>SNORA3</i>    | 0.122429097 | -3.029981617 | 2.63E-23    | 5.72E-20    | Down |
| D | chr11 | <i>SNORA8</i>    | 0.378481876 | -1.401703876 | 0.002144468 | 0.031250042 | Down |
| D | chr20 | <i>WISP2</i>     | 0.019027785 | -5.715748561 | 0.000268093 | 0.008408185 | Down |
| D | chr6  | <i>HIST1H2BM</i> | 2.436073636 | 1.284557742  | 6.04E-05    | 0.00294959  | Up   |
| D | chr8  | <i>ANK1</i>      | 0.375709391 | -1.412310916 | 0.000447279 | 0.01155936  | Down |
| D | chr6  | <i>HIST1H2BO</i> | 0.420123458 | -1.251114752 | 0.000511552 | 0.01247518  | Down |
| D | chr2  | <i>DCTN1</i>     | 0.528164939 | -0.92093956  | 0.000412476 | 0.010960444 | Down |
| D | chr17 | <i>EFCAB5</i>    | 0.042123826 | -4.569219696 | 0.001682185 | 0.026602989 | Down |
| D | chr12 | <i>IFFO1</i>     | 0.337456976 | -1.567224515 | 0.000134677 | 0.005324632 | Down |
| D | chr12 | <i>NUAK1</i>     | 0.192410789 | -2.377738396 | 0.001168316 | 0.02122763  | Down |
| D | chr3  | <i>CADM2</i>     | 0           | #NAME?       | 0.000145448 | 0.005631022 | Down |
| D | chr1  | <i>KCNN3</i>     | 0.027434535 | -5.187863092 | 5.91E-05    | 0.002907885 | Down |
| D | chrX  | <i>UPRT</i>      | 2.367146667 | 1.243149097  | 0.001837557 | 0.0279582   | Up   |
| D | chr16 | <i>C16orf88</i>  | Inf         | Inf          | 2.00E-05    | 0.001345047 | Up   |
| D | chr13 | <i>IRS2</i>      | 0.349404552 | -1.51702969  | 0.000232906 | 0.007596818 | Down |
| D | chr13 | <i>N4BP2L2</i>   | 1.783445267 | 0.834666941  | 0.004103403 | 0.047461968 | Up   |
| D | chr11 | <i>PTDSS2</i>    | 0.433668715 | -1.205334726 | 0.001921855 | 0.0289878   | Down |
| D | chr10 | <i>TMEM180</i>   | 0.290741721 | -1.782189985 | 0.000102627 | 0.004400188 | Down |
| D | chr6  | <i>PRIM2</i>     | 3.234898093 | 1.693720265  | 5.80E-05    | 0.002868728 | Up   |
| D | chr15 | <i>MYO9A</i>     | 2.081532942 | 1.057646391  | 0.0001345   | 0.005324632 | Up   |
| D | chr4  | <i>METAP1</i>    | 2.200242131 | 1.137662297  | 0.000733151 | 0.015627214 | Up   |
| D | chr12 | <i>NUP107</i>    | 1.979876108 | 0.985410156  | 0.001744956 | 0.027135206 | Up   |
| D | chr7  | <i>FASTK</i>     | 0.444165532 | -1.170830655 | 0.001214896 | 0.021666032 | Down |
| D | chr1  | <i>HSP90B3P</i>  | 3.052188661 | 1.60984414   | 0.000161289 | 0.006029626 | Up   |
| D | chrX  | <i>FOXO4</i>     | 0.450583973 | -1.150132097 | 0.000248373 | 0.007981592 | Down |
| D | chr1  | <i>CADM3</i>     | 0.043895255 | -4.509791187 | 0.002463467 | 0.034011481 | Down |
| D | chr16 | <i>CYLD</i>      | 1.809546936 | 0.855628529  | 0.001208521 | 0.021617888 | Up   |
| D | chr6  | <i>BCLAF1</i>    | 1.722447812 | 0.784460272  | 0.003747269 | 0.044771627 | Up   |
| D | chr10 | <i>ATRNL1</i>    | 2.070007377 | 1.049635909  | 0.000926634 | 0.018234973 | Up   |
| D | chr1  | <i>HMCN1</i>     | 0.109105485 | -3.196204465 | 0.00081604  | 0.016687889 | Down |
| D | chr3  | <i>GNL3</i>      | 2.882187227 | 1.527164056  | 5.08E-07    | 8.42E-05    | Up   |

|   |       |                  |             |              |             |             |      |
|---|-------|------------------|-------------|--------------|-------------|-------------|------|
| D | chr18 | <i>GNAL</i>      | 0.159986834 | -2.643974906 | 0.001397067 | 0.023818513 | Down |
| D | chrX  | <i>DOCK11</i>    | 1.877908805 | 0.909127005  | 0.00022487  | 0.00744638  | Up   |
| D | chr19 | <i>CLIP3</i>     | 0.09193561  | -3.443232417 | 0.000282515 | 0.008677571 | Down |
| D | chr10 | <i>TIMM23</i>    | 6.665870336 | 2.736793255  | 5.06E-07    | 8.42E-05    | Up   |
| D | chr19 | <i>DENND1C</i>   | 0.286522249 | -1.803280924 | 0.003706702 | 0.044529282 | Down |
| D | chr8  | <i>DSCC1</i>     | Inf         | Inf          | 0.00015236  | 0.00581241  | Up   |
| D | chrX  | <i>ELK1</i>      | 0.442646263 | -1.175773853 | 0.001852724 | 0.028074897 | Down |
| D | chr13 | <i>ZIC5</i>      | 0           | #NAME?       | 8.06E-06    | 0.000674414 | Down |
| D | chrX  | <i>RLIM</i>      | 2.094077573 | 1.066314886  | 3.39E-05    | 0.001933714 | Up   |
| D | chr14 | <i>SUPT16H</i>   | 1.806111503 | 0.852886963  | 0.00073327  | 0.015627214 | Up   |
| D | chr17 | <i>TP53I13</i>   | 0.077879947 | -3.682604285 | 1.72E-05    | 0.001221473 | Down |
| D | chr2  | <i>ZAK</i>       | 1.844810245 | 0.88347243   | 0.002310597 | 0.032555464 | Up   |
| D | chr11 | <i>ZFP91</i>     | 2.133617349 | 1.093301461  | 0.000342561 | 0.009822839 | Up   |
| D | chr11 | <i>C11orf48</i>  | 7.467447376 | 2.900615166  | 0.000838962 | 0.016970438 | Up   |
| D | chr22 | <i>RBFOX2</i>    | 0.349819428 | -1.51531768  | 0.001293353 | 0.022559327 | Down |
| D | chr8  | <i>RAD21-AS1</i> | 0.115203053 | -3.11774915  | 2.42E-08    | 7.53E-06    | Down |
| D | chr6  | <i>BRD7P3</i>    | 5.135549629 | 2.360518688  | 0.004162793 | 0.047767772 | Up   |
| D | chr17 | <i>FAM222B</i>   | 0.39251617  | -1.349176007 | 0.001485305 | 0.024671455 | Down |
| D | chr17 | <i>RAB11FIP4</i> | 0.348848945 | -1.519325625 | 8.79E-06    | 0.000720944 | Down |
| D | chr1  | <i>ACTA1</i>     | 0.238284983 | -2.06924006  | 2.25E-12    | 1.73E-09    | Down |
| D | chr11 | <i>IGF2</i>      | 0           | #NAME?       | 2.00E-05    | 0.001345047 | Down |
| D | chr3  | <i>TEX264</i>    | 0.400479232 | -1.320200664 | 0.000304808 | 0.009166072 | Down |
| D | chr17 | <i>COL1A1</i>    | 0.059707959 | -4.065932925 | 0.000549755 | 0.013088775 | Down |
| D | chr16 | <i>MAPK3</i>     | 0.524737166 | -0.930333118 | 0.001287092 | 0.022540523 | Down |
| D | chr6  | <i>EYA4</i>      | 0.013431378 | -6.218248902 | 7.63E-06    | 0.000650307 | Down |
| D | chr9  | <i>TMEM8B</i>    | 0.120915693 | -3.047926599 | 2.33E-06    | 0.000273317 | Down |
| D | chr3  | <i>FYTTD1</i>    | 2.468464686 | 1.303614006  | 0.000982447 | 0.019017784 | Up   |
| D | chr9  | <i>TGFBR1</i>    | 2.122955077 | 1.086073844  | 0.000295073 | 0.008953066 | Up   |
| D | chrX  | <i>PAK3</i>      | 2.332981566 | 1.222174908  | 0.002706534 | 0.036254777 | Up   |
| D | chr22 | <i>KCTD17</i>    | 0.318989542 | -1.648418969 | 0.002673936 | 0.036044429 | Down |
| D | chr2  | <i>RIF1</i>      | 1.88303254  | 0.913057931  | 0.000473038 | 0.011891579 | Up   |
| D | chr15 | <i>RPAP1</i>     | 0.484318524 | -1.045971913 | 0.001484855 | 0.024671455 | Down |
| D | chr11 | <i>FAM118B</i>   | 2.416176059 | 1.272725583  | 0.001760269 | 0.027304571 | Up   |
| D | chr1  | <i>SNORA14B</i>  | 0.258008733 | -1.954508198 | 1.54E-08    | 5.76E-06    | Down |
| D | chr6  | <i>ATF6B</i>     | 0.441090483 | -1.18085346  | 0.000723324 | 0.015624508 | Down |
| D | chr15 | <i>WDR76</i>     | 3.211861798 | 1.683409817  | 0.001567207 | 0.025609012 | Up   |
| D | chr19 | <i>SSBP4</i>     | 0.29074692  | -1.782164184 | 0.001074681 | 0.020001949 | Down |
| D | chr12 | <i>ALDH2</i>     | 0.580933974 | -0.78355389  | 0.001780316 | 0.027488494 | Down |
| D | chr17 | <i>UNC13D</i>    | 0.476684268 | -1.068894082 | 3.99E-05    | 0.002179932 | Down |
| D | chr7  | <i>PUS7</i>      | 2.271859024 | 1.183873314  | 0.000102094 | 0.004396094 | Up   |
| D | chr20 | <i>SYS1</i>      | 0.347125781 | -1.526469575 | 0.000148567 | 0.005731676 | Down |
| D | chr3  | <i>NBEAL2</i>    | 0.386931592 | -1.369849567 | 0.002165081 | 0.031366226 | Down |
| D | chr7  | <i>PCLO</i>      | 0.186079439 | -2.426009444 | 0.00409409  | 0.047438539 | Down |
| D | chr22 | <i>TTL12</i>     | 0.4276835   | -1.225384545 | 0.000447042 | 0.01155936  | Down |

|   |       |                 |             |              |             |             |      |
|---|-------|-----------------|-------------|--------------|-------------|-------------|------|
| D | chr14 | <i>KTN1</i>     | 2.08773147  | 1.061936161  | 0.000213409 | 0.007213345 | Up   |
| D | chr12 | <i>TMPO</i>     | 1.623925574 | 0.699485514  | 0.004271947 | 0.048674095 | Up   |
| D | chr1  | <i>PBX1</i>     | 0.539742997 | -0.889655476 | 0.002234607 | 0.03189816  | Down |
| D | chr5  | <i>DCP2</i>     | 1.835842762 | 0.876442499  | 0.002902159 | 0.037902372 | Up   |
| D | chr2  | <i>SNORA70B</i> | 0.145603699 | -2.779881087 | 0.000106826 | 0.004539912 | Down |
| D | chr11 | <i>SNORD22</i>  | 0.328415339 | -1.606406582 | 2.09E-05    | 0.001387281 | Down |
| D | chr22 | <i>C22orf28</i> | 1.668714677 | 0.738737299  | 0.004276333 | 0.048674095 | Up   |
| D | chr10 | <i>LDB1</i>     | 0.475100356 | -1.073695807 | 6.43E-06    | 0.000578426 | Down |
| D | chr1  | <i>SNORA16A</i> | 0.079422512 | -3.654308207 | 1.91E-12    | 1.60E-09    | Down |
| D | chr19 | <i>CKM</i>      | 0.048772506 | -4.357788094 | 0.000171865 | 0.006352202 | Down |
| D | chr14 | <i>PELI2</i>    | 0.370705587 | -1.431654235 | 0.000528348 | 0.012714068 | Down |
| D | chr6  | <i>UFL1</i>     | 1.997201574 | 0.997979949  | 0.00361138  | 0.043836429 | Up   |
| D | chr17 | <i>SHMT1</i>    | 2.185701665 | 1.128096495  | 0.001542229 | 0.02534684  | Up   |
| D | chr15 | <i>GLCE</i>     | 1.872930706 | 0.905297524  | 0.00286723  | 0.037521316 | Up   |
| D | chr9  | <i>LRRC8A</i>   | 0.425600656 | -1.232427721 | 1.35E-05    | 0.001003271 | Down |
| D | chr17 | <i>KIF19</i>    | 0.109738138 | -3.187863092 | 0.003111873 | 0.03960033  | Down |
| D | chr16 | <i>NAE1</i>     | 3.077876014 | 1.621935117  | 5.14E-05    | 0.002651298 | Up   |
| D | chr9  | <i>C9orf89</i>  | 0.401501411 | -1.316523039 | 0.000716454 | 0.015527533 | Down |
| D | chr5  | <i>NDST1</i>    | 0.553324946 | -0.853801127 | 0.00214609  | 0.031250042 | Down |
| D | chr19 | <i>SNORD32A</i> | 0.244971751 | -2.029312701 | 9.25E-05    | 0.004106242 | Down |
| D | chr5  | <i>MEGF10</i>   | 0.036579379 | -4.772825593 | 0.001219069 | 0.021698766 | Down |
| D | chr1  | <i>PTGFRN</i>   | 0.015222228 | -6.037676656 | 1.15E-05    | 0.000885662 | Down |
| D | chr4  | <i>POLR2B</i>   | 1.765208042 | 0.819838225  | 0.001796101 | 0.027666749 | Up   |
| D | chr19 | <i>GRAMD1A</i>  | 0.550859437 | -0.860243862 | 0.004341348 | 0.048925891 | Down |
| D | chr17 | <i>ARHGAP23</i> | 0.374101371 | -1.41849884  | 0.000595699 | 0.013829322 | Down |
| D | chr17 | <i>ARHGAP27</i> | 0.306825632 | -1.704509085 | 5.17E-07    | 8.44E-05    | Down |
| D | chr10 | <i>CUL2</i>     | 1.913744053 | 0.936397894  | 0.001301172 | 0.022665405 | Up   |
| D | chr13 | <i>SACS</i>     | 1.878705128 | 0.909738646  | 0.000290603 | 0.008858649 | Up   |
| D | chr16 | <i>YPEL3</i>    | 0.334704785 | -1.579038919 | 3.72E-07    | 6.92E-05    | Down |
| D | chr12 | <i>ELK3</i>     | 0.466302229 | -1.100662768 | 2.41E-05    | 0.001539584 | Down |
| D | chr19 | <i>ZNF606</i>   | 2.313475363 | 1.210061735  | 0.000362965 | 0.010154526 | Up   |
| D | chr16 | <i>FBXO31</i>   | 0.422091643 | -1.244371828 | 0.001839211 | 0.0279582   | Down |
| D | chr11 | <i>FAM168A</i>  | 0.302877261 | -1.723194825 | 4.07E-06    | 0.000416047 | Down |
| D | chr20 | <i>NCOR1P1</i>  | 0.267472972 | -1.90253498  | 0.000206586 | 0.007109575 | Down |
| D | chr10 | <i>DPYSL4</i>   | 0.184648305 | -2.437148073 | 0.000484966 | 0.01207305  | Down |
| D | chrX  | <i>POLA1</i>    | 1.802537743 | 0.850029468  | 0.000755729 | 0.015843458 | Up   |
| D | chr3  | <i>ATP2C1</i>   | 1.861273281 | 0.896289895  | 0.000988808 | 0.019056092 | Up   |
| D | chr9  | <i>HINT2</i>    | 0.236680092 | -2.078989731 | 0.001960587 | 0.029334612 | Down |
| D | chr14 | <i>WDHD1</i>    | 1.84542358  | 0.883951996  | 0.00146139  | 0.024413258 | Up   |
| D | chr3  | <i>ADAMTS9</i>  | 0.037071443 | -4.753547921 | 3.11E-05    | 0.001844369 | Down |
| D | chr9  | <i>TAF1L</i>    | 2.263929691 | 1.178829154  | 8.66E-05    | 0.003909833 | Up   |
| D | chr20 | <i>TSHZ2</i>    | 0.126258552 | -2.985546979 | 2.51E-06    | 0.000289397 | Down |
| D | chr1  | <i>USP1</i>     | 1.881562368 | 0.911931111  | 0.001022142 | 0.019453237 | Up   |
| D | chr1  | <i>ZNF687</i>   | 0.42079573  | -1.248808028 | 5.97E-06    | 0.000548074 | Down |

|   |       |                 |             |              |             |             |      |
|---|-------|-----------------|-------------|--------------|-------------|-------------|------|
| D | chr14 | <i>RPPH1</i>    | 0.287753314 | -1.797095553 | 0.000971491 | 0.018917982 | Down |
| D | chr19 | <i>ZNF160</i>   | 3.068239293 | 1.617411004  | 0.003466609 | 0.042576682 | Up   |
| D | chr12 | <i>AMN1</i>     | 0.228248536 | -2.131322485 | 0.00252443  | 0.034706258 | Down |
| D | chr2  | <i>SLC4A1AP</i> | 2.210281039 | 1.144229821  | 0.002086096 | 0.030619785 | Up   |
| D | chr15 | <i>IMP3</i>     | 0.431267617 | -1.213344703 | 0.002348984 | 0.032848004 | Down |
| D | chr1  | <i>NASP</i>     | 2.895776932 | 1.533950473  | 0.003715685 | 0.044529282 | Up   |
| D | chr19 | <i>ZNF625</i>   | 2.010718475 | 1.007711101  | 0.000466618 | 0.011790233 | Up   |
| D | chr4  | <i>WHSC1</i>    | 1.7642865   | 0.819084857  | 0.001159308 | 0.021154525 | Up   |
| D | chr22 | <i>MN1</i>      | 0.355590614 | -1.491710852 | 0.003595126 | 0.043714459 | Down |
| D | chr19 | <i>ZNF628</i>   | 0.18352955  | -2.445915726 | 2.21E-05    | 0.001456399 | Down |
| D | chr16 | <i>SLC38A7</i>  | 0.320675981 | -1.640811796 | 0.000693645 | 0.015235667 | Down |
| D | chr11 | <i>FZD4</i>     | 0.278528247 | -1.844104447 | 0.004461989 | 0.049970451 | Down |
| D | chr3  | <i>CLCN2</i>    | 0.198207502 | -2.334916524 | 5.10E-07    | 8.42E-05    | Down |
| D | chr10 | <i>KIF11</i>    | 1.919936457 | 0.941058563  | 0.000315498 | 0.009245079 | Up   |
| D | chr3  | <i>SNORA62</i>  | 0.135819381 | -2.880238736 | 9.30E-06    | 0.000758101 | Down |
| D | chr3  | <i>SNORA63</i>  | 0.236593511 | -2.079517588 | 1.52E-08    | 5.76E-06    | Down |
| D | chr2  | <i>DNAH6</i>    | 0.014041275 | -6.154182197 | 7.14E-05    | 0.003315112 | Down |
| D | chr2  | <i>DNAH7</i>    | 0.115114683 | -3.118856233 | 2.98E-05    | 0.001786481 | Down |
| D | chr3  | <i>ATP13A3</i>  | 1.683358087 | 0.751342102  | 0.002605095 | 0.035511641 | Up   |
| D | chr17 | <i>MIF4GD</i>   | 0.403826449 | -1.308192691 | 0.001582667 | 0.025622886 | Down |
| D | chr5  | <i>LARS</i>     | 1.908400589 | 0.932364037  | 0.002015898 | 0.02988118  | Up   |
| D | chr1  | <i>MEF2D</i>    | 0.457974581 | -1.12666057  | 0.001819771 | 0.027804256 | Down |
| D | chr10 | <i>TRIM8</i>    | 0.434226611 | -1.203479954 | 2.51E-05    | 0.001581441 | Down |
| D | chr18 | <i>CTIF</i>     | 0.262968356 | -1.92703889  | 0.000710052 | 0.015473202 | Down |
| D | chrY  | <i>ZFY</i>      | 2.241038104 | 1.164167179  | 0.00071097  | 0.015473202 | Up   |
| D | chr5  | <i>MSH3</i>     | 2.827240454 | 1.499394588  | 5.42E-05    | 0.002740337 | Up   |
| D | chr15 | <i>FANCI</i>    | 2.220710827 | 1.151021542  | 0.003919397 | 0.046395625 | Up   |
| D | chr11 | <i>EML3</i>     | 0.528138015 | -0.921013105 | 0.001209555 | 0.021617888 | Down |
| D | chr3  | <i>SNORA7B</i>  | 0.250385019 | -1.997779848 | 7.36E-07    | 0.000114222 | Down |
| D | chr17 | <i>PELP1</i>    | 0.52106732  | -0.940458319 | 0.004275771 | 0.048674095 | Down |
| D | chr8  | <i>ATAD2</i>    | 1.838652284 | 0.878648671  | 0.000623855 | 0.014204955 | Up   |
| D | chr8  | <i>ZFHX4</i>    | 0.060662361 | -4.043054538 | 0.001837657 | 0.0279582   | Down |
| D | chr6  | <i>ABCC10</i>   | 0.340905715 | -1.552555311 | 0.0004789   | 0.011992711 | Down |
| D | chr5  | <i>FAM193B</i>  | 0.52971663  | -0.916707293 | 0.002160558 | 0.031366226 | Down |
| D | chr22 | <i>SBF1</i>     | 0.516699289 | -0.952603196 | 0.001193552 | 0.021493665 | Down |
| D | chr3  | <i>SNORA81</i>  | 0.046372109 | -4.430598856 | 7.35E-59    | 9.59E-55    | Down |
| D | chr4  | <i>HAUS3</i>    | 1.961021699 | 0.971605499  | 0.00160682  | 0.025841374 | Up   |
| D | chr5  | <i>GDNF</i>     | 0.017551594 | -5.832254102 | 0.000463976 | 0.011788157 | Down |
| D | chr1  | <i>SEPN1</i>    | 0.424199663 | -1.237184619 | 0.000963936 | 0.018798908 | Down |
| D | chr11 | <i>SNORD97</i>  | 0.3149676   | -1.666724663 | 6.60E-06    | 0.00058544  | Down |
| D | chr11 | <i>RHOG</i>     | 0.496474169 | -1.010209437 | 0.000240479 | 0.007804815 | Down |
| D | chr9  | <i>NELF</i>     | 0.447111285 | -1.161294135 | 0.002597733 | 0.035452538 | Down |
| D | chr19 | <i>MED16</i>    | 0.363452196 | -1.460162473 | 0.000487336 | 0.01207305  | Down |
| D | chr1  | <i>CACNA1E</i>  | 0.388151114 | -1.365309668 | 0.003634886 | 0.044055806 | Down |

|   |       |          |             |              |             |             |      |
|---|-------|----------|-------------|--------------|-------------|-------------|------|
| D | chr11 | TENM4    | 0.220460403 | -2.181408538 | 0.003999451 | 0.046967446 | Down |
| D | chr11 | MUC6     | 0           | #NAME?       | 0.000525633 | 0.012676406 | Down |
| D | chr18 | ME2      | 3.004739738 | 1.587240034  | 4.87E-06    | 0.000481143 | Up   |
| D | chr8  | PRKDC    | 1.811761265 | 0.857392865  | 0.00154253  | 0.02534684  | Up   |
| D | chr19 | MED25    | 0.282843517 | -1.821923992 | 5.24E-08    | 1.42E-05    | Down |
| D | chr12 | LMBR1L   | 0.40733498  | -1.295712385 | 0.000426689 | 0.011166763 | Down |
| D | chr9  | TNC      | 0.035103189 | -4.832254102 | 0.000383941 | 0.010523696 | Down |
| D | chr10 | KIF5B    | 2.269850438 | 1.18259724   | 1.77E-05    | 0.001239292 | Up   |
| D | chr1  | PPAP2B   | 0.139548926 | -2.84115707  | 0.000635404 | 0.014392559 | Down |
| D | chr3  | SNORA6   | 0.121404519 | -3.042105971 | 7.39E-12    | 5.08E-09    | Down |
| D | chr17 | FTSJ3    | 2.208279659 | 1.142922889  | 0.00129201  | 0.022559327 | Up   |
| D | chr20 | NDUFA5   | 3.055937705 | 1.611615134  | 0.000733017 | 0.015627214 | Up   |
| D | chr11 | SYVN1    | 0.414308018 | -1.271224354 | 0.003432037 | 0.042283084 | Down |
| D | chr2  | IMMT     | 1.727229883 | 0.788460109  | 0.003353779 | 0.041646614 | Up   |
| D | chr19 | LYL1     | 0.43234576  | -1.209742553 | 0.000667307 | 0.014781576 | Down |
| D | chr15 | NTRK3    | 0.03261906  | -4.938140982 | 0.000452719 | 0.011604378 | Down |
| D | chr2  | RANBP2   | 2.118111152 | 1.0827783    | 1.85E-05    | 0.001274354 | Up   |
| D | chr2  | EIF5B    | 1.958451315 | 0.969713265  | 0.000375372 | 0.010375857 | Up   |
| D | chr8  | EBAG9    | 2.312357167 | 1.209364254  | 0.004142236 | 0.047657632 | Up   |
| D | chr16 | ZNF646   | 0.579965984 | -0.785959807 | 0.00303444  | 0.038966867 | Down |
| D | chr19 | ZNF93    | Inf         | Inf          | 0.002154686 | 0.031340226 | Up   |
| D | chr7  | ORAI2    | 0.393550878 | -1.345377938 | 0.000365024 | 0.010154526 | Down |
| D | chr17 | TRAF4    | 0.416750162 | -1.262745333 | 0.00181282  | 0.027760405 | Down |
| D | chr1  | LEPROT   | 0.452478408 | -1.144079144 | 0.004124482 | 0.047621886 | Down |
| D | chr11 | PRDM11   | 0.442365379 | -1.176689613 | 0.000548345 | 0.013079074 | Down |
| D | chr17 | MED31    | Inf         | Inf          | 0.000467199 | 0.011790233 | Up   |
| D | chr11 | TEAD1    | 0.025274296 | -5.30618529  | 1.02E-06    | 0.000149367 | Down |
| D | chr1  | VANGL2   | 0.272371091 | -1.876354507 | 2.04E-06    | 0.000244325 | Down |
| D | chr11 | CD81     | 0.53479525  | -0.902941442 | 0.001882509 | 0.028460127 | Down |
| D | chr11 | CD82     | 0.274607445 | -1.864557356 | 4.70E-05    | 0.002453796 | Down |
| D | chr17 | KIAA0195 | 0.362629702 | -1.463430999 | 3.39E-05    | 0.001933714 | Down |
| D | chrX  | ZFX      | 1.685389621 | 0.753082146  | 0.003670728 | 0.044221597 | Up   |
| D | chrX  | DDX3X    | 1.862331348 | 0.897109781  | 0.000182655 | 0.006588731 | Up   |
| D | chr8  | DUSP4    | 0.219476276 | -2.187863092 | 0.004048463 | 0.04716098  | Down |
| D | chr17 | KPNB1    | 1.613187926 | 0.689914513  | 0.004054681 | 0.047191281 | Up   |
| D | chr6  | GFOD1    | 0.311958058 | -1.68057602  | 0.000282668 | 0.008677571 | Down |
| D | chr21 | PSMG1    | 4.727811379 | 2.241172479  | 0.000276309 | 0.008583356 | Up   |
| D | chr12 | KCNA1    | 0.13327176  | -2.907556991 | 0.00192854  | 0.029055031 | Down |
| D | chr6  | FOXO3    | 0.400837097 | -1.318912062 | 0.000344733 | 0.009863446 | Down |
| D | chr12 | KCNA6    | 0.01268519  | -6.300711062 | 1.10E-05    | 0.00087256  | Down |
| D | chr12 | MTERFD3  | 14.78267247 | 3.885835204  | 0.001032348 | 0.019548678 | Up   |
| D | chr7  | AGFG2    | 0.36344758  | -1.460180794 | 0.001569183 | 0.025609012 | Down |
| D | chr18 | LAMA3    | 0.056484494 | -4.146001306 | 7.81E-06    | 0.000657304 | Down |
| D | chr9  | VPS13A   | 1.815631509 | 0.86047143   | 0.000735426 | 0.015627214 | Up   |

|   |       |                  |             |              |             |             |      |
|---|-------|------------------|-------------|--------------|-------------|-------------|------|
| D | chr2  | <i>KCNK12</i>    | 0.201760609 | -2.309283556 | 1.87E-08    | 6.09E-06    | Down |
| D | chr14 | <i>OXA1L</i>     | 0.422289164 | -1.243696869 | 0.004279082 | 0.048674095 | Down |
| D | chr8  | <i>INTS10</i>    | 1.830071697 | 0.87190017   | 0.003925866 | 0.046395625 | Up   |
| D | chr2  | <i>VRK2</i>      | 2.33221109  | 1.221698374  | 0.003340159 | 0.041622778 | Up   |
| D | chr15 | <i>NARG2</i>     | 2.20258482  | 1.139197578  | 0.002989586 | 0.038657209 | Up   |
| D | chr20 | <i>SUMO1P1</i>   | 2.774128068 | 1.472034391  | 0.001044182 | 0.01968706  | Up   |
| D | chr2  | <i>ACTR3</i>     | 1.768690589 | 0.822681688  | 0.000712826 | 0.015474613 | Up   |
| D | chr9  | <i>PTENP1</i>    | 1.877658917 | 0.908935016  | 0.001056712 | 0.019837296 | Up   |
| D | chr16 | <i>ZFPM1</i>     | 0.224886216 | -2.15273286  | 2.90E-07    | 5.54E-05    | Down |
| D | chr14 | <i>NFKBIA</i>    | 0.49534137  | -1.013504978 | 0.000747728 | 0.015786445 | Down |
| D | chr5  | <i>LOC644936</i> | 0.451550234 | -1.147041602 | 0.000110419 | 0.004602654 | Down |
| D | chr18 | <i>GALNT1</i>    | 1.77007451  | 0.823810091  | 0.000833812 | 0.016918727 | Up   |
| D | chr10 | <i>MKI67</i>     | 2.370289925 | 1.245063535  | 0.000278767 | 0.008630118 | Up   |
| D | chr17 | <i>SENP3</i>     | 6.981907497 | 2.803621243  | 0.001732543 | 0.026974333 | Up   |
| D | chr22 | <i>CARD10</i>    | 0.034059176 | -4.875812653 | 2.61E-08    | 7.74E-06    | Down |
| D | chr12 | <i>MBD6</i>      | 0.295449375 | -1.759017146 | 0.000154372 | 0.00583473  | Down |
| D | chr11 | <i>RPLPOP2</i>   | 0.164490666 | -2.603922377 | 3.50E-08    | 1.01E-05    | Down |
| D | chr12 | <i>SP7</i>       | 0           | #NAME?       | 0.000631247 | 0.014323263 | Down |
| D | chr18 | <i>ZNF532</i>    | 0.418396761 | -1.25705641  | 0.001031082 | 0.019548678 | Down |
| D | chr12 | <i>SCARNA11</i>  | 0.119903448 | -3.06005495  | 1.21E-10    | 6.60E-08    | Down |
| D | chr8  | <i>MCM4</i>      | 1.822187179 | 0.865671164  | 0.000743614 | 0.015775506 | Up   |
| D | chr12 | <i>SOX5</i>      | 0.145492573 | -2.780982581 | 7.24E-06    | 0.00062534  | Down |
| D | chr1  | <i>NCDN</i>      | 0.469122632 | -1.091962991 | 0.000196847 | 0.006885432 | Down |
| D | chr15 | <i>UBE2Q2</i>    | 2.121192332 | 1.084875438  | 0.00036467  | 0.010154526 | Up   |
| D | chrX  | <i>GRIA3</i>     | 1.955376624 | 0.967446511  | 0.000116841 | 0.004784166 | Up   |
| D | chr19 | <i>THOP1</i>     | 3.012829751 | 1.591119151  | 0.000245018 | 0.007912757 | Up   |
| D | chr14 | <i>SRP54</i>     | 1.952291458 | 0.965168449  | 0.000112538 | 0.004676077 | Up   |
| D | chr12 | <i>EP400NL</i>   | Inf         | Inf          | 0.000859933 | 0.017233116 | Up   |
| D | chr3  | <i>SMC4</i>      | 2.169517025 | 1.117373908  | 2.56E-05    | 0.001597519 | Up   |
| D | chr11 | <i>ARHGEF17</i>  | 0.252840575 | -1.983700096 | 0.003713618 | 0.044529282 | Down |
| D | chr16 | <i>USP7</i>      | 1.652728445 | 0.724849699  | 0.003084236 | 0.039489729 | Up   |
| D | chr11 | <i>GPR137</i>    | 0.426999476 | -1.227693795 | 0.002305438 | 0.032517898 | Down |
| D | chr1  | <i>PEAR1</i>     | 0.340090511 | -1.556009344 | 0.000789584 | 0.016351914 | Down |
| D | chr7  | <i>PNPLA8</i>    | 2.229288097 | 1.156583072  | 0.000824028 | 0.016746259 | Up   |
| D | chr3  | <i>RPL24</i>     | 2.331008635 | 1.220954349  | 3.39E-05    | 0.001933714 | Up   |
| D | chr22 | <i>LDOC1L</i>    | 0.152498806 | -2.713130151 | 0.001609898 | 0.025841374 | Down |
| D | chr17 | <i>TRIM25</i>    | 0.431339812 | -1.213103213 | 0.001476879 | 0.024608985 | Down |
| D | chr10 | <i>MTRNR2L5</i>  | 0.187074903 | -2.418312064 | 1.20E-19    | 1.95E-16    | Down |
| D | chr6  | <i>GRM1</i>      | 0.086457909 | -3.531858251 | 0.000413863 | 0.01097494  | Down |
| D | chrX  | <i>MAGT1</i>     | 2.392417335 | 1.258469076  | 0.000116973 | 0.004784166 | Up   |
| D | chr4  | <i>TMEM128</i>   | 4.452763655 | 2.154701038  | 0.000462181 | 0.011777499 | Up   |
| D | chr11 | <i>FAU</i>       | 0.605551506 | -0.72367842  | 0.002577953 | 0.035292353 | Down |
| D | chr19 | <i>FOSB</i>      | 0.229405152 | -2.124030306 | 0.000356581 | 0.010048193 | Down |
| D | chr6  | <i>SNORA29</i>   | 0.165277569 | -2.597037156 | 6.79E-10    | 3.54E-07    | Down |

|   |       |                 |             |              |             |             |      |
|---|-------|-----------------|-------------|--------------|-------------|-------------|------|
| D | chr5  | <i>RHOBTB3</i>  | 2.154052789 | 1.107053606  | 0.002179442 | 0.031473683 | Up   |
| D | chr17 | <i>HLF</i>      | 0.431958521 | -1.211035311 | 9.86E-07    | 0.000146181 | Down |
| D | chr16 | <i>MAZ</i>      | 0.390835565 | -1.355366339 | 1.25E-08    | 4.93E-06    | Down |
| D | chr9  | <i>FBXW5</i>    | 0.528448112 | -0.920166274 | 0.004153931 | 0.047708039 | Down |
| D | chr17 | <i>SCARNA16</i> | 0.289972902 | -1.786010009 | 0.001074304 | 0.020001949 | Down |
| D | chr19 | <i>ZBTB7A</i>   | 0.408664522 | -1.291011095 | 0.000309844 | 0.009229521 | Down |
| D | chr6  | <i>SNORA38</i>  | 0.085095271 | -3.554777229 | 0.001151538 | 0.021047016 | Down |
| D | chr16 | <i>CDH8</i>     | 3.511425185 | 1.812056697  | 0.001457637 | 0.024388751 | Up   |
| D | chr19 | <i>DHX34</i>    | 0.421396561 | -1.246749555 | 0.001785401 | 0.027534423 | Down |
| D | chr9  | <i>GCNT1</i>    | 2.915393998 | 1.543690868  | 0.000647304 | 0.01456396  | Up   |
| D | chr2  | <i>FKBP7</i>    | Inf         | Inf          | 0.003196846 | 0.040298794 | Up   |
| D | chr1  | <i>SEMA6C</i>   | 0.171031813 | -2.547663397 | 0.000240412 | 0.007804815 | Down |
| D | chr14 | <i>OSGEP</i>    | 3.092807071 | 1.628916841  | 0.002348722 | 0.032848004 | Up   |
| D | chr8  | <i>GEM</i>      | 0.226714374 | -2.141052234 | 9.37E-08    | 2.35E-05    | Down |
| D | chrX  | <i>XIST</i>     | 28.29612248 | 4.822532464  | 0.001838416 | 0.0279582   | Up   |
| D | chr21 | <i>GABPA</i>    | 2.350518622 | 1.23297911   | 0.00110214  | 0.020439643 | Up   |
| D | chr9  | <i>NR4A3</i>    | 0.017551594 | -5.832254102 | 8.30E-05    | 0.003772726 | Down |
| D | chr15 | <i>LRRC28</i>   | 0.393338982 | -1.346154922 | 0.002580586 | 0.035292353 | Down |
| D | chr2  | <i>TLK1</i>     | 1.865234989 | 0.899357398  | 0.001605393 | 0.025841374 | Up   |
| D | chr17 | <i>CCL4</i>     | 0.073158759 | -3.772825593 | 0.003679128 | 0.04426232  | Down |
| D | chr19 | <i>GLTSCR1</i>  | 0.20214958  | -2.306504891 | 2.04E-06    | 0.000244325 | Down |
| D | chr17 | <i>BRCA1</i>    | 3.35930517  | 1.748162861  | 7.23E-05    | 0.003343981 | Up   |
| D | chr1  | <i>HLX</i>      | 0.255528921 | -1.968441507 | 0.000877253 | 0.017447432 | Down |
| D | chr19 | <i>HIF3A</i>    | 0.094654281 | -3.401188426 | 4.16E-05    | 0.00222353  | Down |
| D | chr17 | <i>HOXB6</i>    | 0.112395281 | -3.153346628 | 0.004039237 | 0.047137675 | Down |
| D | chr12 | <i>RAPGEF3</i>  | 0.293491853 | -1.768607637 | 0.001768102 | 0.027332254 | Down |
| D | chr17 | <i>HOXB9</i>    | 0.015044224 | -6.054646523 | 0.000120857 | 0.004927578 | Down |
| D | chr2  | <i>LRP1B</i>    | 0.02537038  | -5.300711062 | 3.16E-05    | 0.001860143 | Down |
| D | chr11 | <i>SNORA23</i>  | 0.179834431 | -2.47525883  | 5.32E-16    | 7.72E-13    | Down |
| D | chr2  | <i>CTDSP1</i>   | 0.488419149 | -1.033808331 | 0.000857651 | 0.017215034 | Down |
| D | chr3  | <i>TOPBP1</i>   | 2.422969997 | 1.27677654   | 2.38E-06    | 0.000277565 | Up   |
| D | chr4  | <i>SMARCA5</i>  | 2.180140045 | 1.124420812  | 0.000845376 | 0.017047331 | Up   |
| D | chr16 | <i>FBXL19</i>   | 0.460961718 | -1.117281153 | 0.000220506 | 0.00737051  | Down |
| D | chr14 | <i>SERPINA1</i> | 0           | #NAME?       | 4.12E-05    | 0.002213021 | Down |
| D | chr1  | <i>SWT1</i>     | 2.352233908 | 1.23403153   | 0.002940814 | 0.038139954 | Up   |
| D | chrX  | <i>DIAPH2</i>   | 2.4609436   | 1.299211595  | 0.000397457 | 0.010714102 | Up   |
| D | chr1  | <i>CACYBP</i>   | 3.171646173 | 1.665231834  | 0.000524725 | 0.012676406 | Up   |
| D | chr17 | <i>ATP1B2</i>   | 0.257116503 | -1.959505884 | 0.000455737 | 0.011636015 | Down |
| D | chr20 | <i>PCIF1</i>    | 0.515435308 | -0.956136727 | 0.000218913 | 0.007342312 | Down |
| D | chr5  | <i>TTC37</i>    | 1.969969281 | 0.978173133  | 0.000770102 | 0.016076023 | Up   |
| D | chr22 | <i>RHBDD3</i>   | 0.17559729  | -2.509657513 | 0.000936125 | 0.018394008 | Down |
| D | chr4  | <i>RNF4</i>     | 1.762375759 | 0.817521556  | 0.003526895 | 0.043085585 | Up   |
| D | chr11 | <i>STARD10</i>  | 0.564188842 | -0.825749961 | 0.003255695 | 0.04080408  | Down |
| D | chr2  | <i>TCF7L1</i>   | 0.079546249 | -3.652062289 | 0.00054569  | 0.013039603 | Down |

|   |       |                   |             |              |             |             |      |
|---|-------|-------------------|-------------|--------------|-------------|-------------|------|
| D | chr13 | <i>BRCA2</i>      | 4.076834937 | 2.027449546  | 4.21E-05    | 0.002242059 | Up   |
| D | chr22 | <i>DES1</i>       | 0.496063463 | -1.011403394 | 0.001639919 | 0.026113344 | Down |
| D | chr1  | <i>ZNF362</i>     | 0.341146303 | -1.551537513 | 0.001231888 | 0.02183755  | Down |
| D | chr9  | <i>SH2D3C</i>     | 0.332363621 | -1.589165616 | 0.00074776  | 0.015786445 | Down |
| D | chr19 | <i>TBC1D17</i>    | 0.396657053 | -1.334035894 | 0.000605384 | 0.013930227 | Down |
| D | chr16 | <i>PIGQ</i>       | 0.274531854 | -1.864954542 | 2.89E-05    | 0.001745652 | Down |
| D | chr14 | <i>MTA1</i>       | 0.595096204 | -0.748805181 | 0.002328423 | 0.032665524 | Down |
| D | chr2  | <i>TTC30A</i>     | 7.46809815  | 2.900740888  | 0.002347528 | 0.032848004 | Up   |
| D | chr11 | <i>TSPAN4</i>     | 0.512252712 | -0.965072379 | 0.003917285 | 0.046395625 | Down |
| D | chr20 | <i>RBM38</i>      | 0.406287078 | -1.299428614 | 0.000756532 | 0.015843458 | Down |
| D | chr20 | <i>GGT7</i>       | 0           | #NAME?       | 0.000331078 | 0.009599047 | Down |
| D | chr1  | <i>HNRNPR</i>     | 1.857408877 | 0.893291435  | 0.001842332 | 0.0279582   | Up   |
| D | chr1  | <i>HNRNPU</i>     | 1.736916111 | 0.796528077  | 0.00079198  | 0.0163642   | Up   |
| D | chr11 | <i>SNORA54</i>    | 0.100224246 | -3.318696537 | 1.15E-05    | 0.000885662 | Down |
| D | chr17 | <i>MNT</i>        | 0.4901919   | -1.028581449 | 0.000491599 | 0.012101672 | Down |
| D | chr1  | <i>LDLRAP1</i>    | 0.424091971 | -1.237550924 | 0.000356568 | 0.010048193 | Down |
| D | chr6  | <i>HIST1H3A</i>   | 0.347077983 | -1.526668246 | 4.08E-06    | 0.000416047 | Down |
| D | chr8  | <i>RUNX1T1</i>    | 0.146569653 | -2.770341664 | 1.32E-07    | 3.02E-05    | Down |
| D | chr11 | <i>SNORA57</i>    | 0.179124294 | -2.480967076 | 1.38E-07    | 3.06E-05    | Down |
| D | chr6  | <i>HIST1H3C</i>   | 0.080230893 | -3.639698328 | 1.96E-12    | 1.60E-09    | Down |
| D | chr6  | <i>HIST1H3D</i>   | 0.32857935  | -1.605686281 | 7.53E-07    | 0.000114222 | Down |
| D | chr6  | <i>HIST1H3E</i>   | 0.045355177 | -4.46258897  | 5.31E-06    | 0.00050894  | Down |
| D | chr6  | <i>HIST1H3F</i>   | 0.162594441 | -2.620650159 | 7.34E-11    | 4.17E-08    | Down |
| D | chr3  | <i>STAG1</i>      | 1.72881776  | 0.789785798  | 0.001318358 | 0.022934156 | Up   |
| D | chr6  | <i>HIST1H3H</i>   | 0.239703982 | -2.060674218 | 1.52E-12    | 1.42E-09    | Down |
| D | chr6  | <i>HIST1H3I</i>   | 0.070206377 | -3.832254102 | 0.000926556 | 0.018234973 | Down |
| D | chr12 | <i>B3GNT4</i>     | 0           | #NAME?       | 0.001391288 | 0.023791215 | Down |
| D | chr6  | <i>ATAT1</i>      | 0.289719841 | -1.787269608 | 1.95E-05    | 0.001333045 | Down |
| D | chr17 | <i>SLC16A11</i>   | 0.208977858 | -2.258578002 | 0.000639099 | 0.014442137 | Down |
| D | chr15 | <i>KIAA0101</i>   | 2.631962936 | 1.396139173  | 4.59E-05    | 0.00241407  | Up   |
| D | chr11 | <i>NCAPD3</i>     | 2.095940004 | 1.06759742   | 0.000662033 | 0.014713904 | Up   |
| D | chr3  | <i>NAT6</i>       | 0.399127707 | -1.325077663 | 0.002660466 | 0.035932811 | Down |
| D | chr16 | <i>GNAO1</i>      | 0.13710628  | -2.866633441 | 4.68E-05    | 0.002452858 | Down |
| D | chr17 | <i>MIR21</i>      | 0.338221663 | -1.563959029 | 0.002426332 | 0.033569832 | Down |
| D | chr10 | <i>CSGALNACT2</i> | 1.980133703 | 0.985597847  | 0.001235618 | 0.021873954 | Up   |
| D | chr11 | <i>RELA</i>       | 0.535403824 | -0.901300651 | 0.002187328 | 0.031498973 | Down |
| D | chr6  | <i>HIST1H4A</i>   | 0.29456608  | -1.763336784 | 3.22E-06    | 0.000343995 | Down |
| D | chr6  | <i>HIST1H4B</i>   | 0.255696942 | -1.96749319  | 4.49E-08    | 1.25E-05    | Down |
| D | chr6  | <i>HIST1H4C</i>   | 0.143365136 | -2.802233866 | 0.002297514 | 0.032476338 | Down |
| D | chr2  | <i>SOX11</i>      | 0.074634949 | -3.74400483  | 0.00308253  | 0.039489729 | Down |
| D | chr16 | <i>TMCS</i>       | 0           | #NAME?       | 0.000255934 | 0.008164241 | Down |
| D | chr6  | <i>HIST1H4H</i>   | 0.156935127 | -2.671759787 | 5.06E-05    | 0.002617861 | Down |
| D | chr6  | <i>HIST1H4I</i>   | 0.310949299 | -1.68524873  | 2.42E-05    | 0.001539584 | Down |
| D | chr20 | <i>MTRNR2L3</i>   | 0.452623411 | -1.143616887 | 0.001678987 | 0.026584638 | Down |

|   |       |                 |             |              |             |             |      |
|---|-------|-----------------|-------------|--------------|-------------|-------------|------|
| D | chr2  | <i>PMS1</i>     | 6.331597717 | 2.662569596  | 1.38E-06    | 0.000185762 | Up   |
| D | chrX  | <i>RPS6KA3</i>  | 1.918619642 | 0.940068732  | 0.000201429 | 0.00698948  | Up   |
| D | chr12 | <i>NCKAP5L</i>  | 0.190561849 | -2.391668775 | 5.27E-05    | 0.002685809 | Down |
| D | chr10 | <i>GHITM</i>    | 2.118774641 | 1.083230146  | 0.000122921 | 0.004965157 | Up   |
| D | chr4  | <i>SMARCAD1</i> | 2.020428952 | 1.01466162   | 0.000143838 | 0.005596391 | Up   |
| D | chr7  | <i>ZCWPW1</i>   | Inf         | Inf          | 0.000316287 | 0.009245079 | Up   |
| D | chr10 | <i>KIF20B</i>   | 1.95307955  | 0.965750712  | 0.002934841 | 0.038139954 | Up   |
| D | chr3  | <i>GOLIM4</i>   | 2.507343834 | 1.326159848  | 0.001142976 | 0.020973845 | Up   |
| D | chr12 | <i>PTGES3</i>   | 1.80387209  | 0.851097043  | 0.00408374  | 0.047402629 | Up   |
| D | chr10 | <i>PIK3AP1</i>  | 0.412831578 | -1.276374766 | 3.45E-05    | 0.001947133 | Down |
| D | chr15 | <i>MAPKBP1</i>  | 0.460075409 | -1.120057749 | 0.000603248 | 0.01390562  | Down |
| D | chr19 | <i>SAMD4B</i>   | 0.362772529 | -1.462862883 | 2.93E-07    | 5.54E-05    | Down |
| D | chr1  | <i>CTPS1</i>    | 2.426085329 | 1.278630293  | 0.000209474 | 0.007135938 | Up   |
| D | chr19 | <i>PPP1R12C</i> | 0.405409759 | -1.302547276 | 9.68E-05    | 0.004209605 | Down |
| D | chr5  | <i>HARS2</i>    | 2.363805804 | 1.241111517  | 0.000880846 | 0.017481781 | Up   |
| D | chr11 | <i>API5</i>     | 2.119874576 | 1.083978909  | 0.001263407 | 0.022185286 | Up   |
| D | chr1  | <i>PLEKHA6</i>  | 0.318803112 | -1.649262382 | 0.000428259 | 0.011166763 | Down |
| D | chr3  | <i>PDHB</i>     | 1.950483757 | 0.963831984  | 0.001090556 | 0.020268495 | Up   |
| D | chr3  | <i>CAPN7</i>    | 1.978972762 | 0.984751756  | 0.000452532 | 0.011604378 | Up   |
| D | chr7  | <i>CHPF2</i>    | 0.553212383 | -0.854094646 | 0.003323789 | 0.041498058 | Down |
| D | chr1  | <i>S100BPB</i>  | 0.535981479 | -0.899744946 | 0.003238394 | 0.040626274 | Down |
| D | chr19 | <i>PTOV1</i>    | 0.461474791 | -1.115676254 | 0.000206791 | 0.007109575 | Down |
| D | chr17 | <i>SDK2</i>     | 0           | #NAME?       | 2.88E-05    | 0.00174562  | Down |
| D | chr15 | <i>CASC5</i>    | 2.360729184 | 1.239232549  | 5.52E-05    | 0.00276164  | Up   |
| D | chr14 | <i>JAG2</i>     | 0.306112088 | -1.707868081 | 0.001730526 | 0.026974333 | Down |
| D | chr19 | <i>ZNF358</i>   | 0.163331182 | -2.614127847 | 5.92E-06    | 0.000548074 | Down |
| D | chr18 | <i>DTNA</i>     | 0           | #NAME?       | 2.87E-07    | 5.54E-05    | Down |
| D | chr20 | <i>DLGAP4</i>   | 0.487333523 | -1.037018628 | 0.000610328 | 0.013976093 | Down |
| D | chr16 | <i>ZNF319</i>   | 0.288999332 | -1.790861938 | 6.96E-05    | 0.003290883 | Down |
| D | chr2  | <i>XPO1</i>     | 1.958660794 | 0.969867569  | 0.001690659 | 0.026640128 | Up   |
| D | chr19 | <i>RABAC1</i>   | 0.46714304  | -1.098063721 | 0.001242111 | 0.021929388 | Down |
| D | chr1  | <i>MPZ</i>      | 0.031353754 | -4.995218014 | 0.000269878 | 0.008443882 | Down |
| D | chr5  | <i>SNORA74A</i> | 0.212078199 | -2.237331769 | 1.80E-08    | 6.03E-06    | Down |
| D | chr5  | <i>SNORA74B</i> | 0.138240339 | -2.854749438 | 2.17E-11    | 1.35E-08    | Down |
| D | chr7  | <i>KRIT1</i>    | 1.946171646 | 0.960638957  | 0.00048766  | 0.01207305  | Up   |
| D | chr3  | <i>U2SURP</i>   | 1.965138294 | 0.974630844  | 0.000264676 | 0.008365973 | Up   |
| D | chr7  | <i>MOSPD3</i>   | 0.260263258 | -1.941956436 | 0.004296061 | 0.048712664 | Down |
| D | chr2  | <i>PUS10</i>    | 4.013461888 | 2.004847198  | 1.72E-08    | 5.90E-06    | Up   |
| D | chr2  | <i>GTF3C2</i>   | 0.608930879 | -0.715649621 | 0.003936426 | 0.046436296 | Down |
| D | chr20 | <i>SPATA2</i>   | 0.422934689 | -1.241493201 | 0.002000913 | 0.029767287 | Down |
| D | chr6  | <i>TAPBP</i>    | 0.299037153 | -1.741603355 | 6.76E-06    | 0.000591621 | Down |
| D | chr21 | <i>RWDD2B</i>   | 3.499810892 | 1.80727697   | 0.003233571 | 0.040626274 | Up   |
| D | chr8  | <i>ZHX1</i>     | 1.774878882 | 0.827720578  | 0.001437717 | 0.024266352 | Up   |
| D | chr11 | <i>ATM</i>      | 1.710663726 | 0.77455619   | 0.002615327 | 0.035580989 | Up   |

|   |       |                  |             |              |             |             |      |
|---|-------|------------------|-------------|--------------|-------------|-------------|------|
| D | chr3  | <i>DCBLD2</i>    | 0.199710396 | -2.324018662 | 0.000630017 | 0.014320267 | Down |
| D | chr17 | <i>LLGL2</i>     | 0.34487315  | -1.535862282 | 0.00431004  | 0.048712664 | Down |
| D | chr3  | <i>CPNE4</i>     | 0.011701063 | -6.417216602 | 1.12E-05    | 0.000880814 | Down |
| D | chr14 | <i>ADCY4</i>     | 0.429865248 | -1.218043615 | 0.004298014 | 0.048712664 | Down |
| D | chr6  | <i>HLA-A</i>     | 0.559314545 | -0.838268247 | 0.002813    | 0.037071929 | Down |
| D | chr6  | <i>HLA-B</i>     | 0.370855827 | -1.431069656 | 1.63E-05    | 0.001178315 | Down |
| D | chr4  | <i>HSP90AA6P</i> | 2.393004369 | 1.258823031  | 2.27E-05    | 0.001479909 | Up   |
| D | chr6  | <i>HLA-E</i>     | 0.328660843 | -1.605328514 | 0.004430415 | 0.049702169 | Down |
| D | chr6  | <i>HLA-H</i>     | 0.313476313 | -1.67357166  | 0.0004288   | 0.011166763 | Down |
| D | chr19 | <i>ADAMTS10</i>  | 0.561782495 | -0.831916423 | 0.001161958 | 0.021173272 | Down |
| D | chr9  | <i>GFI1B</i>     | 0.376143005 | -1.410646835 | 0.000726821 | 0.015627214 | Down |
| D | chr9  | <i>RXRA</i>      | 0.218343301 | -2.195329827 | 5.49E-06    | 0.00052299  | Down |
| D | chr4  | <i>STAP1</i>     | 2.896019561 | 1.534071347  | 0.004170872 | 0.047776447 | Up   |
| D | chr21 | <i>CBR3-AS1</i>  | 0.057210468 | -4.127577053 | 1.04E-06    | 0.000150074 | Down |
| D | chr15 | <i>TRPM7</i>     | 1.630473385 | 0.705290892  | 0.00404584  | 0.04716098  | Up   |
| D | chr11 | <i>FAM160A2</i>  | 0.41464716  | -1.270043884 | 9.45E-05    | 0.004133141 | Down |
| D | chr6  | <i>TTK</i>       | 3.706887167 | 1.890208202  | 9.42E-05    | 0.004133141 | Up   |
| D | chr1  | <i>PLEKHG5</i>   | 0.34545355  | -1.533436356 | 0.002070991 | 0.030475718 | Down |
| D | chr2  | <i>SCN1A</i>     | 0           | #NAME?       | 0.00125658  | 0.022124969 | Down |
| D | chr12 | <i>ADCY6</i>     | 0.428089862 | -1.224014425 | 4.05E-05    | 0.002192926 | Down |
| D | chr5  | <i>GM2A</i>      | 0.230486696 | -2.117244617 | 0.000855179 | 0.017191866 | Down |
| D | chr5  | <i>MAN2A1</i>    | 1.965284266 | 0.974738004  | 0.00218316  | 0.031473683 | Up   |
| D | chr19 | <i>SHANK1</i>    | 0.053893288 | -4.213750571 | 2.43E-07    | 4.90E-05    | Down |
| D | chr22 | <i>MICALL1</i>   | 0.32675375  | -1.613724302 | 0.000991957 | 0.019088587 | Down |
| D | chr19 | <i>DYRK1B</i>    | 0.258586268 | -1.951282431 | 6.51E-06    | 0.000581577 | Down |
| D | chr17 | <i>SLC9A3R1</i>  | 0.453570939 | -1.140599886 | 0.000404366 | 0.010805736 | Down |
| D | chr5  | <i>GRIA1</i>     | 0.069139908 | -3.854337511 | 0.000483731 | 0.012067375 | Down |
| D | chr17 | <i>UTP18</i>     | 2.553763771 | 1.352625079  | 7.57E-05    | 0.003478124 | Up   |
| D | chr4  | <i>MFSD10</i>    | 0.410034474 | -1.286182885 | 0.00184288  | 0.0279582   | Down |
| D | chr5  | <i>TARS</i>      | 2.158765576 | 1.110206587  | 0.000179344 | 0.006536053 | Up   |
| D | chr14 | <i>MYH6</i>      | 0.110370791 | -3.179569671 | 0.004094106 | 0.047438539 | Down |
| D | chr17 | <i>DNAH2</i>     | 0.040662923 | -4.620142262 | 5.48E-09    | 2.55E-06    | Down |
| D | chr2  | <i>SIX3</i>      | 0.010530957 | -6.569219696 | 1.33E-06    | 0.000184706 | Down |
| D | chr19 | <i>KDELRL1</i>   | 0.497258131 | -1.007933134 | 0.000350703 | 0.009947006 | Down |
| D | chr1  | <i>RNU11</i>     | 0.101763258 | -3.296711336 | 4.85E-33    | 3.16E-29    | Down |
| D | chr15 | <i>NR2F2</i>     | 0.114630297 | -3.12493969  | 0.00159576  | 0.025767179 | Down |
| D | chr1  | <i>LOC148709</i> | 0.182957465 | -2.45041981  | 0.003890089 | 0.046254261 | Down |
| D | chr4  | <i>GRIA2</i>     | 0.269670366 | -1.890731104 | 2.83E-05    | 0.001742909 | Down |
| D | chr3  | <i>ITGA9</i>     | 0.403876479 | -1.308013966 | 0.002474237 | 0.034124065 | Down |
| D | chr19 | <i>MKNK2</i>     | 0.513224439 | -0.962338223 | 0.000189615 | 0.006767101 | Down |
| D | chr17 | <i>RPS6KB1</i>   | 1.825020344 | 0.867912546  | 0.002607508 | 0.035511641 | Up   |
| D | chr15 | <i>LOC729739</i> | 0.057441582 | -4.121760719 | 0.003640949 | 0.044066287 | Down |
| D | chr4  | <i>RFC1</i>      | 1.820846587 | 0.864609375  | 0.001359129 | 0.023530934 | Up   |
| D | chr4  | <i>DDX60</i>     | 2.492551988 | 1.317623596  | 0.00351458  | 0.043056075 | Up   |

|   |       |            |             |              |             |             |      |
|---|-------|------------|-------------|--------------|-------------|-------------|------|
| D | chr10 | ZSWIM8     | 0.557856285 | -0.842034593 | 0.003520585 | 0.043085585 | Down |
| D | chr19 | GEMIN7     | 0.217597488 | -2.200266193 | 0.000470106 | 0.011840687 | Down |
| D | chr9  | ARRDC1     | 0.511202385 | -0.968033527 | 0.002746046 | 0.036447268 | Down |
| D | chr15 | MESDC1     | 0.3606678   | -1.47125747  | 0.002522018 | 0.034706258 | Down |
| D | chr11 | GVINP1     | 2.001696808 | 1.00122347   | 3.18E-05    | 0.001860143 | Up   |
| D | chr3  | ITGB5      | 0.478512381 | -1.063371841 | 0.001362758 | 0.023549538 | Down |
| D | chr16 | PAR6A      | 0.327082139 | -1.612275116 | 0.000559079 | 0.013286528 | Down |
| D | chr12 | LARP4      | 2.069123743 | 1.049019927  | 8.25E-05    | 0.003761327 | Up   |
| D | chr12 | GLI1       | 0.135062324 | -2.88830281  | 0.003588035 | 0.04369813  | Down |
| D | chr3  | TOP2B      | 2.051717048 | 1.036831783  | 1.75E-05    | 0.001233113 | Up   |
| D | chr15 | VPS13C     | 1.930507928 | 0.948980479  | 0.000427372 | 0.011166763 | Up   |
| D | chr3  | TMF1       | 1.832002062 | 0.873421128  | 0.003944219 | 0.046486207 | Up   |
| D | chr10 | KCNMA1     | 0.039252116 | -4.671085761 | 0.000113889 | 0.004717156 | Down |
| D | chr1  | MTF2       | 1.677777712 | 0.746551587  | 0.002289004 | 0.032391146 | Up   |
| D | chr17 | GLOD4      | 2.295480265 | 1.198796029  | 0.001379932 | 0.023689433 | Up   |
| D | chr10 | SEMA4G     | 0.138115927 | -2.856048398 | 1.68E-05    | 0.001196013 | Down |
| D | chr14 | SNORA28    | 0.087150399 | -3.520348922 | 1.59E-24    | 4.15E-21    | Down |
| D | chr2  | KIAA1841   | 2.380514423 | 1.25127337   | 0.000175933 | 0.006458144 | Up   |
| D | chr21 | ITSN1      | 0.519110334 | -0.945886887 | 0.00210546  | 0.030761404 | Down |
| D | chr19 | TYK2       | 0.400389103 | -1.320525386 | 6.84E-05    | 0.003256223 | Down |
| D | chr19 | TMEM145    | 0.043895255 | -4.509791187 | 2.47E-05    | 0.001561681 | Down |
| D | chr3  | OPA1       | 1.818900302 | 0.863066468  | 0.001965495 | 0.029374358 | Up   |
| D | chr2  | CPSF3      | 2.038685464 | 1.027639208  | 0.000154734 | 0.00583473  | Up   |
| D | chr4  | NAA15      | 1.881011476 | 0.911508651  | 0.000207615 | 0.007109575 | Up   |
| D | chr18 | SMCHD1     | 1.785046517 | 0.835961671  | 0.000819944 | 0.016709663 | Up   |
| D | chr17 | MIR3064    | 0.493434238 | -1.019070272 | 0.003187204 | 0.040255032 | Down |
| D | chr9  | SNORA65    | 0.312488619 | -1.67812445  | 1.22E-05    | 0.000925485 | Down |
| D | chr8  | SYBU       | 0.129914337 | -2.944367445 | 0.003922775 | 0.046395625 | Down |
| D | chr10 | SKIDA1     | 0.103709862 | -3.26937501  | 1.17E-06    | 0.000165303 | Down |
| D | chr17 | MLLT6      | 0.451672018 | -1.146652556 | 0.000107557 | 0.004556176 | Down |
| D | chr7  | LHFPL3-AS2 | 0.298286343 | -1.745230169 | 5.06E-06    | 0.000496156 | Down |
| D | chr14 | HECTD1     | 1.616536706 | 0.692906267  | 0.003916701 | 0.046395625 | Up   |
| D | chr11 | PCNXL3     | 0.332089449 | -1.590356207 | 0.00051625  | 0.012519552 | Down |
| D | chr2  | UGP2       | 1.982916935 | 0.987624244  | 0.000799969 | 0.016488453 | Up   |
| D | chr2  | ARL4C      | 0.504552188 | -0.986924593 | 0.004024246 | 0.047089089 | Down |
| D | chr22 | SH3BP1     | 0.375208882 | -1.414234115 | 0.000588022 | 0.013748967 | Down |
| D | chr9  | NAIF1      | 0.26713956  | -1.904334459 | 0.002677671 | 0.036053222 | Down |
| D | chr6  | CUL9       | 0.282778388 | -1.822256231 | 1.53E-06    | 0.000199433 | Down |
| D | chr8  | RAD54B     | 3.297557836 | 1.721397963  | 0.000300685 | 0.009102187 | Up   |
| D | chr6  | ABRA1      | 2.809461119 | 1.490293435  | 0.001006482 | 0.019282773 | Up   |
| D | chr2  | 7-Mar      | 2.21728182  | 1.14879215   | 0.000309737 | 0.009229521 | Up   |
| D | chr10 | VPS26A     | 1.920954354 | 0.941823238  | 0.003439486 | 0.042334877 | Up   |
| D | chr1  | RNASEL     | 5.798407029 | 2.535656609  | 0.001281113 | 0.02246597  | Up   |
| D | chr3  | SCARNA7    | 0.344940384 | -1.535581051 | 1.21E-05    | 0.000919737 | Down |

|   |       |                  |             |              |             |             |      |
|---|-------|------------------|-------------|--------------|-------------|-------------|------|
| D | chr2  | <i>SNORA75</i>   | 0.182957465 | -2.45041981  | 2.08E-05    | 0.001387281 | Down |
| D | chr1  | <i>DNM3</i>      | 0.206288176 | -2.277266961 | 0.002940066 | 0.038139954 | Down |
| D | chr20 | <i>CHRNA4</i>    | 0           | #NAME?       | 0.000388842 | 0.010591264 | Down |
| D | chr15 | <i>SCARNA14</i>  | 0.085740929 | -3.543872136 | 3.91E-07    | 7.18E-05    | Down |
| D | chr3  | <i>TMIE</i>      | 0.048772506 | -4.357788094 | 0.001192838 | 0.021493665 | Down |
| D | chr5  | <i>OXCT1</i>     | 2.963521757 | 1.567312649  | 2.44E-07    | 4.90E-05    | Up   |
| D | chr1  | <i>HIST2H3D</i>  | 0.359608373 | -1.475501482 | 1.26E-05    | 0.000940803 | Down |
| D | chrX  | <i>TXLNG</i>     | 1.994261022 | 0.995854252  | 0.001451198 | 0.024388751 | Up   |
| D | chr15 | <i>BNIP2</i>     | 2.124032578 | 1.086805894  | 0.003004112 | 0.038768203 | Up   |
| D | chr17 | <i>ATAD5</i>     | 3.384638363 | 1.759001695  | 4.05E-07    | 7.30E-05    | Up   |
| D | chr2  | <i>MPHOSPH10</i> | 2.6653049   | 1.414300581  | 9.47E-05    | 0.004133141 | Up   |
| D | chr18 | <i>RIOK3</i>     | 2.32275805  | 1.215838884  | 2.87E-05    | 0.00174562  | Up   |
| D | chrX  | <i>ZNF280C</i>   | 2.207861467 | 1.142649653  | 0.00091061  | 0.017973878 | Up   |
| D | chr3  | <i>GATA2</i>     | 0.400311071 | -1.320806581 | 0.002089565 | 0.030619785 | Down |
| D | chr18 | <i>SMAD7</i>     | 0.368945937 | -1.438518668 | 4.20E-07    | 7.30E-05    | Down |
| D | chr8  | <i>EGR3</i>      | 0.130093124 | -2.942383381 | 0.000166948 | 0.006205624 | Down |
| D | chr15 | <i>ZNF710</i>    | 0.438827457 | -1.188274298 | 7.04E-05    | 0.003305413 | Down |
| D | chr14 | <i>ZFH2</i>      | 0.216776145 | -2.205722087 | 0.001369364 | 0.023601179 | Down |
| D | chr9  | <i>UBAP2</i>     | 0.547030764 | -0.870306125 | 0.00352649  | 0.043085585 | Down |
| D | chr20 | <i>SLC35C2</i>   | 0.533589198 | -0.906198633 | 0.004351109 | 0.048955976 | Down |
| D | chr7  | <i>KIAA0087</i>  | 0.023402126 | -5.417216602 | 0.001712307 | 0.026797211 | Down |
| D | chr2  | <i>MTIF2</i>     | 2.831157192 | 1.501391853  | 5.96E-05    | 0.00292258  | Up   |
| D | chr11 | <i>EIF3M</i>     | 1.866016919 | 0.899962067  | 0.003102471 | 0.03960033  | Up   |
| D | chr3  | <i>NMD3</i>      | 2.275571065 | 1.186228642  | 0.000212724 | 0.007208862 | Up   |
| D | chr19 | <i>JUNB</i>      | 0.304491077 | -1.715528143 | 9.66E-08    | 2.38E-05    | Down |
| D | chr19 | <i>JUND</i>      | 0.298350158 | -1.744921556 | 7.48E-07    | 0.000114222 | Down |
| D | chr11 | <i>HBB</i>       | 0.498963229 | -1.002994595 | 0.004099504 | 0.04745894  | Down |
| D | chr10 | <i>HNRNPF</i>    | 1.952352418 | 0.965213497  | 0.002071891 | 0.030475718 | Up   |
| D | chr14 | <i>JPH4</i>      | 0.017564109 | -5.831225778 | 0.000231054 | 0.007574259 | Down |
| D | chr19 | <i>CACNA1A</i>   | 0.300246149 | -1.735782354 | 0.001486301 | 0.024671455 | Down |
