# Supplementary material for: Deletion of Asxl1 results in myelodysplasia and severe developmental defects in vivo
Source: PubMed Central journal article supplement — J Exp Med. 2013 Nov 18;210(12):2641–59. doi: 10.1084/jem.20131141 (PMC3832937; doi:10.1084/jem.20131141), 2013-11-18
Supplement: supp_jem.20131141_JEM_20131141_TableS4.pdf [file supp_jem.20131141_JEM_20131141_TableS4.pdf]

**Table S4.** Regions with significant Asx1 binding by anti-Asx1 ChIP-Seq

| Chr  | Start    | End      | Length    | Summit | Tags | -10*Log10 (p-value) | Fold enrichment | FDR  |
|------|----------|----------|-----------|--------|------|---------------------|-----------------|------|
|      |          |          | <i>bp</i> |        |      |                     |                 | %    |
| chr1 | 4797505  | 4798435  | 931       | 475    | 39   | 124.27              | 9.52            | 0.07 |
| chr1 | 4847475  | 4848084  | 610       | 238    | 38   | 134.15              | 8.46            | 0.08 |
| chr1 | 6204183  | 6205467  | 1285      | 478    | 59   | 118.18              | 7.78            | 0.07 |
| chr1 | 7387875  | 7388809  | 935       | 480    | 35   | 114.56              | 7.55            | 0.06 |
| chr1 | 9737285  | 9739035  | 1751      | 1316   | 72   | 119.52              | 5.69            | 0.07 |
| chr1 | 9787479  | 9788421  | 943       | 499    | 34   | 86.95               | 8.09            | 0.07 |
| chr1 | 9933706  | 9934596  | 891       | 523    | 34   | 81.74               | 7.69            | 0.1  |
| chr1 | 10027268 | 10028648 | 1381      | 805    | 55   | 115.13              | 5.15            | 0.06 |
| chr1 | 10029448 | 10030430 | 983       | 460    | 39   | 125.93              | 9.16            | 0.07 |
| chr1 | 13362319 | 13364679 | 2361      | 722    | 104  | 236.36              | 8.09            | 0    |
| chr1 | 13649909 | 13651068 | 1160      | 695    | 48   | 79.27               | 6.89            | 0.1  |
| chr1 | 14299570 | 14300391 | 822       | 361    | 30   | 99.21               | 8.74            | 0.08 |
| chr1 | 16094110 | 16096357 | 2248      | 1756   | 95   | 180.63              | 5.73            | 0    |
| chr1 | 16608703 | 16609871 | 1169      | 688    | 55   | 97.67               | 5.3             | 0.08 |
| chr1 | 16654930 | 16655941 | 1012      | 465    | 49   | 114.11              | 6.15            | 0.06 |
| chr1 | 21068741 | 21069957 | 1217      | 772    | 58   | 208.36              | 10.62           | 0    |
| chr1 | 33870803 | 33871585 | 783       | 509    | 31   | 84.41               | 6.81            | 0.06 |
| chr1 | 34489627 | 34490278 | 652       | 458    | 23   | 70.41               | 5.56            | 0.16 |
| chr1 | 34491020 | 34492119 | 1100      | 736    | 56   | 168.74              | 10.02           | 0.06 |
| chr1 | 34495745 | 34497174 | 1430      | 499    | 72   | 137.61              | 7.53            | 0.09 |
| chr1 | 34529257 | 34530327 | 1071      | 499    | 47   | 90.66               | 6.22            | 0.07 |
| chr1 | 34898944 | 34900448 | 1505      | 831    | 65   | 140.64              | 6.68            | 0.09 |
| chr1 | 34906313 | 34907891 | 1579      | 543    | 72   | 131.9               | 8.09            | 0.08 |
| chr1 | 36320604 | 36321477 | 874       | 504    | 39   | 98.72               | 7.32            | 0.08 |
| chr1 | 36327465 | 36330716 | 3252      | 2784   | 164  | 356.91              | 7.29            | 0    |
| chr1 | 36363925 | 36365096 | 1172      | 713    | 59   | 109.46              | 6.47            | 0.06 |
| chr1 | 36425537 | 36426241 | 705       | 446    | 28   | 77.83               | 7.66            | 0.12 |
| chr1 | 36501693 | 36502367 | 675       | 272    | 27   | 92.46               | 8.14            | 0.07 |
| chr1 | 36568198 | 36569096 | 899       | 536    | 43   | 129.71              | 9.61            | 0.08 |
| chr1 | 36613219 | 36614195 | 977       | 339    | 43   | 141                 | 7.53            | 0.09 |
| chr1 | 36765829 | 36767150 | 1322      | 845    | 62   | 96.55               | 4.96            | 0.08 |
| chr1 | 36996043 | 36997421 | 1379      | 845    | 62   | 100.65              | 5.3             | 0.08 |
| chr1 | 37486512 | 37487676 | 1165      | 480    | 66   | 150.51              | 6.97            | 0.1  |
| chr1 | 37921206 | 37922581 | 1376      | 507    | 66   | 131.71              | 5.39            | 0.08 |
| chr1 | 37946858 | 37947795 | 938       | 416    | 37   | 106.19              | 9.14            | 0.06 |
| chr1 | 38053501 | 38054932 | 1432      | 407    | 61   | 142.05              | 8.09            | 0.09 |
| chr1 | 39424244 | 39425718 | 1475      | 539    | 57   | 99.54               | 5.73            | 0.08 |
| chr1 | 39535050 | 39536169 | 1120      | 574    | 46   | 109.36              | 7.32            | 0.06 |
| chr1 | 39592092 | 39593268 | 1177      | 563    | 61   | 96.44               | 6.19            | 0.08 |
| chr1 | 39632048 | 39634852 | 2805      | 2361   | 141  | 146.58              | 4.15            | 0.09 |
| chr1 | 40847281 | 40848009 | 729       | 301    | 25   | 78.42               | 5.93            | 0.12 |

|      |          |          |      |      |     |        |       |      |
|------|----------|----------|------|------|-----|--------|-------|------|
| chr1 | 43154899 | 43156050 | 1152 | 771  | 47  | 103.77 | 6.62  | 0.06 |
| chr1 | 43884127 | 43885229 | 1103 | 765  | 58  | 120.94 | 6.42  | 0.07 |
| chr1 | 43990200 | 43991512 | 1313 | 453  | 58  | 81.98  | 5.22  | 0.1  |
| chr1 | 44158857 | 44159551 | 695  | 356  | 23  | 70.46  | 8.09  | 0.16 |
| chr1 | 44175231 | 44177296 | 2066 | 618  | 100 | 147.6  | 5.31  | 0.1  |
| chr1 | 46909355 | 46911335 | 1981 | 878  | 99  | 213.46 | 6.85  | 0    |
| chr1 | 51534589 | 51535860 | 1272 | 646  | 82  | 191.16 | 10.37 | 0    |
| chr1 | 52289047 | 52290653 | 1607 | 1039 | 88  | 177.87 | 11.06 | 0.07 |
| chr1 | 52556389 | 52558012 | 1624 | 442  | 60  | 169.91 | 9.1   | 0.06 |
| chr1 | 52783265 | 52784142 | 878  | 466  | 29  | 72.77  | 6.62  | 0.15 |
| chr1 | 52901416 | 52902347 | 932  | 556  | 46  | 77.29  | 5.06  | 0.12 |
| chr1 | 53353384 | 53354411 | 1028 | 576  | 43  | 99.37  | 6.62  | 0.08 |
| chr1 | 53409040 | 53409899 | 860  | 418  | 32  | 113.01 | 8.09  | 0.06 |
| chr1 | 53840843 | 53842377 | 1535 | 1139 | 75  | 169.14 | 7.77  | 0.06 |
| chr1 | 54982328 | 54983485 | 1158 | 827  | 47  | 141.68 | 7.61  | 0.09 |
| chr1 | 55083495 | 55084934 | 1440 | 865  | 82  | 193.56 | 8.96  | 0    |
| chr1 | 55144077 | 55145797 | 1721 | 1166 | 84  | 159.16 | 5.78  | 0.11 |
| chr1 | 55187562 | 55188672 | 1111 | 395  | 52  | 216.31 | 11.56 | 0    |
| chr1 | 57029723 | 57030650 | 928  | 408  | 36  | 114.63 | 8.65  | 0.06 |
| chr1 | 57434085 | 57435293 | 1209 | 424  | 55  | 145.72 | 7.32  | 0.09 |
| chr1 | 57463008 | 57464081 | 1074 | 514  | 44  | 104.87 | 6.93  | 0.06 |
| chr1 | 58026279 | 58027280 | 1002 | 533  | 52  | 153.05 | 9.93  | 0.1  |
| chr1 | 58449097 | 58450486 | 1390 | 677  | 80  | 220.72 | 7.77  | 0    |
| chr1 | 58479684 | 58481342 | 1659 | 1202 | 87  | 192.17 | 5.39  | 0    |
| chr1 | 58501921 | 58502702 | 782  | 587  | 31  | 90.04  | 5.84  | 0.07 |
| chr1 | 58709276 | 58710034 | 759  | 386  | 27  | 94.15  | 7.57  | 0.07 |
| chr1 | 58767910 | 58768843 | 934  | 549  | 32  | 77.47  | 7.64  | 0.12 |
| chr1 | 58768933 | 58769563 | 631  | 245  | 23  | 81.37  | 6.18  | 0.1  |
| chr1 | 58769937 | 58770968 | 1032 | 284  | 37  | 78.8   | 4.37  | 0.12 |
| chr1 | 58851707 | 58852953 | 1247 | 816  | 44  | 102.2  | 5.26  | 0.05 |
| chr1 | 59176573 | 59177430 | 858  | 193  | 37  | 122.33 | 7.14  | 0.07 |
| chr1 | 59293468 | 59294493 | 1026 | 529  | 54  | 125.39 | 8.39  | 0.07 |
| chr1 | 59371667 | 59372454 | 788  | 266  | 31  | 84.3   | 6.42  | 0.06 |
| chr1 | 59538237 | 59539513 | 1277 | 747  | 64  | 177.51 | 9.19  | 0.07 |
| chr1 | 59727071 | 59728197 | 1127 | 547  | 46  | 133.83 | 9.52  | 0.08 |
| chr1 | 59819395 | 59820946 | 1552 | 719  | 63  | 179.92 | 7.44  | 0    |
| chr1 | 59969272 | 59970279 | 1008 | 521  | 49  | 177.37 | 9.04  | 0.07 |
| chr1 | 60236779 | 60237810 | 1032 | 697  | 42  | 93.85  | 5.52  | 0.07 |
| chr1 | 60623041 | 60624596 | 1556 | 998  | 65  | 205.46 | 7.94  | 0    |
| chr1 | 62749167 | 62750701 | 1535 | 977  | 66  | 125.5  | 4.53  | 0.07 |
| chr1 | 63159539 | 63161785 | 2247 | 447  | 103 | 326.26 | 12.14 | 0    |
| chr1 | 63222888 | 63223964 | 1077 | 650  | 46  | 80.52  | 4.49  | 0.1  |
| chr1 | 64167792 | 64169357 | 1566 | 1057 | 98  | 293.7  | 8.74  | 0    |
| chr1 | 64578974 | 64579955 | 982  | 480  | 48  | 174.02 | 12.3  | 0.07 |

|      |          |          |      |      |     |        |       |      |
|------|----------|----------|------|------|-----|--------|-------|------|
| chr1 | 64663236 | 64664366 | 1131 | 498  | 60  | 98.87  | 6.42  | 0.08 |
| chr1 | 64737009 | 64737653 | 645  | 465  | 23  | 73.71  | 6.78  | 0.13 |
| chr1 | 64783612 | 64784648 | 1037 | 197  | 38  | 120.35 | 8.09  | 0.07 |
| chr1 | 65002528 | 65003716 | 1189 | 757  | 50  | 146.15 | 8.09  | 0.09 |
| chr1 | 65224335 | 65226303 | 1969 | 607  | 110 | 260.23 | 7.19  | 0    |
| chr1 | 65232482 | 65233812 | 1331 | 814  | 66  | 224.67 | 8.99  | 0    |
| chr1 | 66862579 | 66864607 | 2029 | 1507 | 93  | 236.66 | 8.05  | 0    |
| chr1 | 71148640 | 71150238 | 1599 | 400  | 67  | 188.18 | 8.48  | 0    |
| chr1 | 72757547 | 72758433 | 887  | 537  | 34  | 93.66  | 6.29  | 0.07 |
| chr1 | 74282534 | 74284264 | 1731 | 539  | 100 | 196.87 | 6.57  | 0    |
| chr1 | 74330690 | 74331898 | 1209 | 691  | 68  | 224.39 | 9.63  | 0    |
| chr1 | 74341757 | 74342764 | 1008 | 471  | 48  | 93.37  | 5.2   | 0.07 |
| chr1 | 74421495 | 74422967 | 1473 | 344  | 61  | 96.46  | 5.11  | 0.08 |
| chr1 | 74432948 | 74434146 | 1199 | 647  | 51  | 111.02 | 5.98  | 0.06 |
| chr1 | 74437650 | 74439848 | 2199 | 1134 | 100 | 167.8  | 5.22  | 0.06 |
| chr1 | 74441878 | 74445312 | 3435 | 2168 | 201 | 259.16 | 5.36  | 0    |
| chr1 | 74633792 | 74635152 | 1361 | 498  | 60  | 100.36 | 4.62  | 0.08 |
| chr1 | 74708152 | 74708831 | 680  | 243  | 29  | 73.1   | 6.99  | 0.13 |
| chr1 | 74759281 | 74760330 | 1050 | 312  | 46  | 83.81  | 4.49  | 0.06 |
| chr1 | 74863052 | 74864083 | 1032 | 587  | 46  | 163.28 | 9.61  | 0.06 |
| chr1 | 75121064 | 75122183 | 1120 | 653  | 52  | 73.04  | 5.64  | 0.13 |
| chr1 | 75137373 | 75140071 | 2699 | 804  | 171 | 356.68 | 8.09  | 0    |
| chr1 | 75164717 | 75165768 | 1052 | 472  | 46  | 118.43 | 8.09  | 0.07 |
| chr1 | 75188079 | 75189388 | 1310 | 534  | 67  | 153.99 | 6.53  | 0.1  |
| chr1 | 75206759 | 75207927 | 1169 | 646  | 57  | 95.83  | 6.26  | 0.08 |
| chr1 | 75313366 | 75314824 | 1459 | 979  | 78  | 72.19  | 3.42  | 0.15 |
| chr1 | 75396294 | 75397487 | 1194 | 206  | 45  | 79.14  | 4.57  | 0.1  |
| chr1 | 75517583 | 75518832 | 1250 | 485  | 55  | 98.36  | 5.99  | 0.08 |
| chr1 | 80337051 | 80338097 | 1047 | 216  | 44  | 121.7  | 6.78  | 0.07 |
| chr1 | 82279346 | 82280467 | 1122 | 569  | 48  | 88.8   | 5.29  | 0.07 |
| chr1 | 82312784 | 82313613 | 830  | 616  | 43  | 116.61 | 7.42  | 0.07 |
| chr1 | 82720958 | 82722114 | 1157 | 442  | 58  | 112.79 | 7.25  | 0.06 |
| chr1 | 84835658 | 84836778 | 1121 | 529  | 46  | 109.24 | 6.16  | 0.06 |
| chr1 | 87599897 | 87600765 | 869  | 480  | 38  | 71.21  | 6.89  | 0.15 |
| chr1 | 87631645 | 87632990 | 1346 | 863  | 53  | 124.96 | 7.28  | 0.07 |
| chr1 | 87689804 | 87690545 | 742  | 240  | 34  | 120.8  | 10.47 | 0.07 |
| chr1 | 87960621 | 87961785 | 1165 | 993  | 43  | 109.53 | 6.29  | 0.06 |
| chr1 | 88050715 | 88051718 | 1004 | 577  | 47  | 105.15 | 7.12  | 0.06 |
| chr1 | 88255053 | 88256511 | 1459 | 852  | 78  | 114.29 | 4.94  | 0.06 |
| chr1 | 88330449 | 88331993 | 1545 | 887  | 75  | 218.47 | 7.21  | 0    |
| chr1 | 88337053 | 88340178 | 3126 | 1141 | 180 | 412.03 | 6.65  | 0    |
| chr1 | 88400396 | 88401695 | 1300 | 468  | 66  | 175.84 | 8.79  | 0.07 |
| chr1 | 88421144 | 88425295 | 4152 | 1122 | 225 | 541.46 | 7.78  | 0    |
| chr1 | 89109988 | 89111145 | 1158 | 579  | 54  | 89.71  | 6.2   | 0.07 |

|      |           |           |      |      |     |        |       |      |
|------|-----------|-----------|------|------|-----|--------|-------|------|
| chr1 | 89223118  | 89224032  | 915  | 455  | 46  | 141.14 | 8.18  | 0.09 |
| chr1 | 89516477  | 89518572  | 2096 | 1558 | 108 | 172.42 | 4.99  | 0.07 |
| chr1 | 89652067  | 89653314  | 1248 | 475  | 55  | 78.04  | 4.7   | 0.12 |
| chr1 | 89749345  | 89750473  | 1129 | 660  | 45  | 108.53 | 6.01  | 0.06 |
| chr1 | 89904445  | 89905485  | 1041 | 561  | 47  | 100.02 | 6.15  | 0.08 |
| chr1 | 90597837  | 90599295  | 1459 | 834  | 76  | 137.37 | 6.52  | 0.08 |
| chr1 | 90965797  | 90967393  | 1597 | 394  | 78  | 200.37 | 6.1   | 0    |
| chr1 | 92499573  | 92500513  | 941  | 424  | 54  | 127.9  | 9.76  | 0.08 |
| chr1 | 92934181  | 92934857  | 677  | 457  | 25  | 71.7   | 5.55  | 0.15 |
| chr1 | 92949124  | 92950564  | 1441 | 540  | 65  | 132.9  | 5.83  | 0.08 |
| chr1 | 93146150  | 93147910  | 1761 | 438  | 74  | 75.63  | 3.57  | 0.13 |
| chr1 | 93294787  | 93296020  | 1234 | 691  | 58  | 142.13 | 8.44  | 0.09 |
| chr1 | 93309321  | 93310407  | 1087 | 558  | 54  | 76.61  | 4.85  | 0.12 |
| chr1 | 93436705  | 93437864  | 1160 | 580  | 57  | 107.79 | 6.14  | 0.06 |
| chr1 | 94076615  | 94077983  | 1369 | 337  | 57  | 110.95 | 5.37  | 0.06 |
| chr1 | 94369899  | 94371019  | 1121 | 488  | 85  | 241.51 | 11.88 | 0    |
| chr1 | 95202303  | 95203046  | 744  | 271  | 34  | 81.53  | 7.08  | 0.1  |
| chr1 | 95239187  | 95240608  | 1422 | 401  | 63  | 105.59 | 6.07  | 0.06 |
| chr1 | 95341763  | 95342662  | 900  | 453  | 32  | 107.94 | 8.67  | 0.06 |
| chr1 | 95374469  | 95376251  | 1783 | 734  | 108 | 90.91  | 4.2   | 0.07 |
| chr1 | 95650773  | 95652013  | 1241 | 806  | 50  | 139.12 | 7.19  | 0.09 |
| chr1 | 95699859  | 95701157  | 1299 | 554  | 69  | 183.73 | 7.08  | 0    |
| chr1 | 97209815  | 97211466  | 1652 | 725  | 76  | 148.65 | 5.91  | 0.1  |
| chr1 | 99558058  | 99559677  | 1620 | 1123 | 70  | 159.9  | 6.99  | 0.11 |
| chr1 | 99665790  | 99667389  | 1600 | 914  | 86  | 153.51 | 7.59  | 0.1  |
| chr1 | 107559396 | 107560974 | 1579 | 1100 | 73  | 102.56 | 4.3   | 0.06 |
| chr1 | 107677985 | 107678912 | 928  | 422  | 37  | 77.01  | 6.68  | 0.12 |
| chr1 | 107886130 | 107887390 | 1261 | 787  | 64  | 87.43  | 6.07  | 0.07 |
| chr1 | 107890084 | 107891084 | 1001 | 425  | 38  | 90.37  | 5.72  | 0.07 |
| chr1 | 108655842 | 108656976 | 1135 | 573  | 54  | 70.67  | 3.93  | 0.16 |
| chr1 | 108692653 | 108693599 | 947  | 661  | 45  | 109.01 | 5.06  | 0.06 |
| chr1 | 120207012 | 120208236 | 1225 | 669  | 47  | 95.15  | 6.25  | 0.07 |
| chr1 | 120285095 | 120286420 | 1326 | 327  | 49  | 99.93  | 5.39  | 0.08 |
| chr1 | 120355342 | 120356298 | 957  | 413  | 45  | 141.73 | 8.94  | 0.09 |
| chr1 | 121400632 | 121401830 | 1199 | 562  | 73  | 152.34 | 6.13  | 0.1  |
| chr1 | 122017290 | 122018420 | 1131 | 515  | 50  | 129.22 | 5.78  | 0.08 |
| chr1 | 123224017 | 123225113 | 1097 | 377  | 54  | 97.44  | 4.84  | 0.08 |
| chr1 | 123327111 | 123328214 | 1104 | 568  | 48  | 108.49 | 8.44  | 0.06 |
| chr1 | 127330360 | 127333145 | 2786 | 1094 | 153 | 484.6  | 7.91  | 0    |
| chr1 | 127456283 | 127458036 | 1754 | 757  | 86  | 124.78 | 4.41  | 0.07 |
| chr1 | 129670044 | 129671701 | 1658 | 477  | 70  | 77.79  | 3.92  | 0.12 |
| chr1 | 130140449 | 130141588 | 1140 | 605  | 55  | 113    | 5.69  | 0.06 |
| chr1 | 130313016 | 130314436 | 1421 | 782  | 67  | 123.14 | 5.78  | 0.07 |
| chr1 | 130482893 | 130484717 | 1825 | 659  | 80  | 269.16 | 9.16  | 0    |

|      |           |           |      |      |     |        |       |      |
|------|-----------|-----------|------|------|-----|--------|-------|------|
| chr1 | 130485503 | 130486972 | 1470 | 433  | 61  | 161.59 | 7.66  | 0.11 |
| chr1 | 130486975 | 130489585 | 2611 | 631  | 209 | 805.4  | 12.14 | 0    |
| chr1 | 130618275 | 130619551 | 1277 | 330  | 53  | 92.18  | 4.67  | 0.07 |
| chr1 | 133007130 | 133008214 | 1085 | 628  | 41  | 72.58  | 6.07  | 0.15 |
| chr1 | 133034503 | 133035659 | 1157 | 458  | 62  | 174.06 | 8.67  | 0.07 |
| chr1 | 133095354 | 133097255 | 1902 | 731  | 84  | 135.61 | 4.33  | 0.08 |
| chr1 | 133173092 | 133174132 | 1041 | 567  | 46  | 93.07  | 6.69  | 0.07 |
| chr1 | 133423545 | 133425186 | 1642 | 580  | 80  | 109.48 | 5     | 0.06 |
| chr1 | 133585001 | 133585904 | 904  | 337  | 47  | 163.55 | 10.65 | 0.06 |
| chr1 | 133586107 | 133588680 | 2574 | 1089 | 127 | 262.81 | 6.94  | 0    |
| chr1 | 133806551 | 133808124 | 1574 | 242  | 79  | 268.93 | 9.89  | 0    |
| chr1 | 133903562 | 133905325 | 1764 | 576  | 118 | 410.28 | 9.5   | 0    |
| chr1 | 134007929 | 134008807 | 879  | 588  | 31  | 79.38  | 6.36  | 0.1  |
| chr1 | 134029794 | 134030904 | 1111 | 677  | 44  | 82.83  | 4.38  | 0.11 |
| chr1 | 134034275 | 134034921 | 647  | 385  | 24  | 73.48  | 6.3   | 0.13 |
| chr1 | 134035685 | 134036721 | 1037 | 497  | 40  | 111.45 | 6.44  | 0.06 |
| chr1 | 134212319 | 134213930 | 1612 | 401  | 60  | 96.46  | 5.14  | 0.08 |
| chr1 | 134313529 | 134314735 | 1207 | 378  | 46  | 129.4  | 7.61  | 0.08 |
| chr1 | 134921320 | 134922275 | 956  | 565  | 39  | 99.98  | 7.28  | 0.08 |
| chr1 | 134930194 | 134931019 | 826  | 345  | 35  | 71.2   | 6.47  | 0.15 |
| chr1 | 135506294 | 135507335 | 1042 | 562  | 38  | 78.94  | 6.93  | 0.1  |
| chr1 | 135975174 | 135976332 | 1159 | 510  | 71  | 212.26 | 13.27 | 0    |
| chr1 | 136258006 | 136259177 | 1172 | 615  | 77  | 293.61 | 15.8  | 0    |
| chr1 | 136302352 | 136303216 | 865  | 403  | 33  | 85.05  | 8.52  | 0.07 |
| chr1 | 136311323 | 136312891 | 1569 | 472  | 88  | 221.44 | 8.05  | 0    |
| chr1 | 136351616 | 136352477 | 862  | 534  | 31  | 71.33  | 5.33  | 0.15 |
| chr1 | 136453249 | 136454090 | 842  | 339  | 33  | 123.04 | 10.49 | 0.07 |
| chr1 | 137042785 | 137045006 | 2222 | 1299 | 117 | 330.06 | 8.83  | 0    |
| chr1 | 137555917 | 137556974 | 1058 | 508  | 49  | 86.25  | 4.46  | 0.07 |
| chr1 | 137584224 | 137585737 | 1514 | 385  | 57  | 150.61 | 6.78  | 0.1  |
| chr1 | 138027524 | 138028690 | 1167 | 501  | 53  | 153.47 | 6.64  | 0.1  |
| chr1 | 138036528 | 138037431 | 904  | 386  | 40  | 90.12  | 6.77  | 0.07 |
| chr1 | 138311428 | 138312722 | 1295 | 554  | 73  | 149.2  | 6.52  | 0.1  |
| chr1 | 138520998 | 138522005 | 1008 | 577  | 37  | 95.53  | 8.54  | 0.08 |
| chr1 | 140070600 | 140071434 | 835  | 269  | 33  | 107.69 | 7.08  | 0.06 |
| chr1 | 140514126 | 140515208 | 1083 | 570  | 45  | 96.38  | 7.74  | 0.08 |
| chr1 | 140515732 | 140516961 | 1230 | 514  | 50  | 74.79  | 5.78  | 0.13 |
| chr1 | 140858994 | 140861184 | 2191 | 1171 | 77  | 137.63 | 6.28  | 0.09 |
| chr1 | 145623976 | 145624610 | 635  | 399  | 30  | 105.56 | 8.54  | 0.06 |
| chr1 | 145764251 | 145765185 | 935  | 618  | 37  | 98.04  | 5.54  | 0.08 |
| chr1 | 145849198 | 145852066 | 2869 | 2013 | 185 | 292.35 | 9.51  | 0    |
| chr1 | 146095358 | 146096356 | 999  | 808  | 37  | 73.81  | 5.15  | 0.13 |
| chr1 | 152239393 | 152241028 | 1636 | 1149 | 99  | 216.41 | 6.23  | 0    |
| chr1 | 153189914 | 153191128 | 1215 | 391  | 41  | 74.94  | 5.01  | 0.13 |

|      |           |           |      |      |     |        |       |      |
|------|-----------|-----------|------|------|-----|--------|-------|------|
| chr1 | 153275016 | 153276394 | 1379 | 607  | 66  | 124.33 | 5.78  | 0.07 |
| chr1 | 153347603 | 153348418 | 816  | 371  | 28  | 81.36  | 7.17  | 0.1  |
| chr1 | 153601694 | 153603084 | 1391 | 682  | 65  | 118.21 | 4.33  | 0.07 |
| chr1 | 154613054 | 154614611 | 1558 | 647  | 78  | 72.76  | 4.82  | 0.15 |
| chr1 | 154749147 | 154751506 | 2360 | 930  | 99  | 359.36 | 10.83 | 0    |
| chr1 | 155179431 | 155180798 | 1368 | 959  | 47  | 88.92  | 4.78  | 0.07 |
| chr1 | 155334208 | 155335186 | 979  | 531  | 41  | 101.48 | 10.02 | 0.08 |
| chr1 | 155746448 | 155748484 | 2037 | 669  | 128 | 318.63 | 9.76  | 0    |
| chr1 | 156946335 | 156947270 | 936  | 418  | 43  | 112.02 | 11.03 | 0.06 |
| chr1 | 157882047 | 157884069 | 2023 | 1249 | 140 | 183.74 | 5.56  | 0    |
| chr1 | 157887448 | 157888447 | 1000 | 471  | 41  | 86.82  | 5.95  | 0.07 |
| chr1 | 158403824 | 158404829 | 1006 | 510  | 41  | 76.62  | 7.77  | 0.12 |
| chr1 | 158488448 | 158489445 | 998  | 420  | 40  | 82.83  | 5.28  | 0.11 |
| chr1 | 158604076 | 158605051 | 976  | 462  | 38  | 76.08  | 5.98  | 0.12 |
| chr1 | 159342211 | 159343092 | 882  | 543  | 33  | 116.71 | 10.4  | 0.07 |
| chr1 | 162141910 | 162143725 | 1816 | 412  | 79  | 179.9  | 5.88  | 0    |
| chr1 | 162835832 | 162837302 | 1471 | 499  | 70  | 122.92 | 5.3   | 0.07 |
| chr1 | 162964277 | 162965761 | 1485 | 1054 | 79  | 126.61 | 4.76  | 0.07 |
| chr1 | 163806298 | 163807446 | 1149 | 729  | 48  | 80.53  | 5.09  | 0.1  |
| chr1 | 163898860 | 163899918 | 1059 | 541  | 47  | 103.37 | 9.78  | 0.06 |
| chr1 | 164500406 | 164501927 | 1522 | 540  | 75  | 162.15 | 5.29  | 0.11 |
| chr1 | 164669978 | 164671143 | 1166 | 736  | 53  | 112.95 | 5.53  | 0.06 |
| chr1 | 165333498 | 165334327 | 830  | 273  | 32  | 89.56  | 6.29  | 0.07 |
| chr1 | 165859571 | 165860733 | 1163 | 472  | 59  | 176.25 | 10.79 | 0.07 |
| chr1 | 166178388 | 166179449 | 1062 | 494  | 47  | 97.22  | 8.09  | 0.08 |
| chr1 | 167390072 | 167391886 | 1815 | 552  | 88  | 202.07 | 6.34  | 0    |
| chr1 | 167571518 | 167573259 | 1742 | 976  | 108 | 401.12 | 12.95 | 0    |
| chr1 | 167693349 | 167694504 | 1156 | 574  | 65  | 106.21 | 6.97  | 0.06 |
| chr1 | 167695261 | 167696919 | 1659 | 1397 | 61  | 142.93 | 6.44  | 0.09 |
| chr1 | 167932176 | 167933230 | 1055 | 562  | 48  | 144.85 | 8.52  | 0.09 |
| chr1 | 168067553 | 168069002 | 1450 | 936  | 63  | 146.44 | 8.09  | 0.09 |
| chr1 | 168308801 | 168310174 | 1374 | 643  | 69  | 112.83 | 6.07  | 0.06 |
| chr1 | 169238222 | 169239355 | 1134 | 519  | 55  | 148.83 | 9.19  | 0.1  |
| chr1 | 172797426 | 172798589 | 1164 | 599  | 62  | 210.23 | 11.62 | 0    |
| chr1 | 172966731 | 172967548 | 818  | 506  | 41  | 128.11 | 12.96 | 0.08 |
| chr1 | 172967692 | 172969236 | 1545 | 1042 | 68  | 150.35 | 9.85  | 0.1  |
| chr1 | 172974172 | 172975622 | 1451 | 958  | 70  | 118.98 | 7.82  | 0.07 |
| chr1 | 172980690 | 172981616 | 927  | 595  | 35  | 72.49  | 5.15  | 0.15 |
| chr1 | 173032383 | 173033407 | 1025 | 790  | 54  | 131.89 | 8.09  | 0.08 |
| chr1 | 173040830 | 173042126 | 1297 | 726  | 74  | 146.76 | 7.59  | 0.09 |
| chr1 | 173080189 | 173081289 | 1101 | 653  | 45  | 88.52  | 5.39  | 0.07 |
| chr1 | 173162945 | 173165157 | 2213 | 1619 | 105 | 89.89  | 3.64  | 0.07 |
| chr1 | 173176818 | 173177863 | 1046 | 480  | 44  | 71.3   | 4.91  | 0.15 |
| chr1 | 173200057 | 173201036 | 980  | 495  | 37  | 71.1   | 7.04  | 0.16 |

|      |           |           |      |      |     |        |       |      |
|------|-----------|-----------|------|------|-----|--------|-------|------|
| chr1 | 173210661 | 173211675 | 1015 | 423  | 38  | 71.76  | 4.57  | 0.15 |
| chr1 | 173217494 | 173218507 | 1014 | 535  | 50  | 82.8   | 8.09  | 0.11 |
| chr1 | 173224123 | 173225487 | 1365 | 694  | 70  | 308.52 | 14.45 | 0    |
| chr1 | 173258652 | 173260467 | 1816 | 1371 | 75  | 177.56 | 5.96  | 0.07 |
| chr1 | 173318411 | 173321009 | 2599 | 1920 | 137 | 149.92 | 4.65  | 0.1  |
| chr1 | 173340824 | 173342801 | 1978 | 644  | 111 | 171.21 | 6.97  | 0.06 |
| chr1 | 173432062 | 173434415 | 2354 | 1132 | 112 | 314.45 | 7.69  | 0    |
| chr1 | 173576991 | 173578034 | 1044 | 605  | 39  | 102.14 | 7.19  | 0.05 |
| chr1 | 174012116 | 174013341 | 1226 | 696  | 63  | 211.21 | 9.79  | 0    |
| chr1 | 174056797 | 174057411 | 615  | 194  | 22  | 76.99  | 7.87  | 0.12 |
| chr1 | 174077585 | 174079410 | 1826 | 732  | 104 | 253.16 | 7.19  | 0    |
| chr1 | 174240855 | 174242834 | 1980 | 706  | 95  | 138.7  | 5.06  | 0.09 |
| chr1 | 174306045 | 174307170 | 1126 | 405  | 62  | 165.67 | 7.77  | 0.06 |
| chr1 | 174431454 | 174432493 | 1040 | 388  | 39  | 94.01  | 5.45  | 0.07 |
| chr1 | 174562567 | 174563685 | 1119 | 530  | 47  | 129.75 | 7.66  | 0.08 |
| chr1 | 177622273 | 177623386 | 1114 | 522  | 50  | 70.29  | 6.07  | 0.16 |
| chr1 | 178742927 | 178745302 | 2376 | 926  | 134 | 274.58 | 5.39  | 0    |
| chr1 | 179641085 | 179641908 | 824  | 382  | 29  | 72.37  | 5.31  | 0.15 |
| chr1 | 180247969 | 180249848 | 1880 | 824  | 120 | 357.51 | 7.77  | 0    |
| chr1 | 180266143 | 180268652 | 2510 | 1920 | 149 | 326.41 | 8.09  | 0    |
| chr1 | 180335579 | 180337136 | 1558 | 778  | 105 | 403.38 | 9.63  | 0    |
| chr1 | 181476129 | 181477340 | 1212 | 301  | 46  | 112.4  | 5.96  | 0.06 |
| chr1 | 181732839 | 181734200 | 1362 | 463  | 49  | 128.8  | 5.75  | 0.08 |
| chr1 | 182185815 | 182187130 | 1316 | 560  | 66  | 173.25 | 7.39  | 0.07 |
| chr1 | 182571229 | 182572097 | 869  | 300  | 38  | 116.73 | 7.03  | 0.07 |
| chr1 | 182707471 | 182708990 | 1520 | 947  | 68  | 153.73 | 10.55 | 0.1  |
| chr1 | 182742836 | 182744765 | 1930 | 763  | 94  | 323.65 | 8.99  | 0    |
| chr1 | 182780502 | 182781899 | 1398 | 735  | 108 | 202.72 | 8.09  | 0    |
| chr1 | 183073796 | 183074989 | 1194 | 479  | 55  | 156.67 | 7.28  | 0.11 |
| chr1 | 183140587 | 183143314 | 2728 | 1570 | 137 | 428.68 | 9.79  | 0    |
| chr1 | 183186008 | 183188167 | 2160 | 549  | 107 | 293.33 | 6.84  | 0    |
| chr1 | 183771921 | 183772946 | 1026 | 562  | 49  | 77.14  | 5.31  | 0.12 |
| chr1 | 184054520 | 184055642 | 1123 | 757  | 46  | 90.65  | 5.94  | 0.07 |
| chr1 | 184212104 | 184213425 | 1322 | 774  | 68  | 193.41 | 8.09  | 0    |
| chr1 | 184338497 | 184339883 | 1387 | 833  | 61  | 211.09 | 8.71  | 0    |
| chr1 | 185857047 | 185857865 | 819  | 493  | 34  | 90.83  | 6.88  | 0.07 |
| chr1 | 186553029 | 186553780 | 752  | 312  | 31  | 87.11  | 8     | 0.07 |
| chr1 | 186555132 | 186557136 | 2005 | 1599 | 90  | 269.95 | 8.54  | 0    |
| chr1 | 186675954 | 186676961 | 1008 | 431  | 40  | 86.95  | 5.52  | 0.07 |
| chr1 | 187186206 | 187187377 | 1172 | 652  | 78  | 133.06 | 7.5   | 0.08 |
| chr1 | 192751723 | 192753600 | 1878 | 708  | 88  | 294.13 | 9.52  | 0    |
| chr1 | 192849272 | 192850522 | 1251 | 789  | 58  | 147.76 | 8.83  | 0.1  |
| chr1 | 193005980 | 193008513 | 2534 | 1128 | 139 | 272.89 | 8.09  | 0    |
| chr1 | 193047858 | 193049134 | 1277 | 573  | 89  | 227.9  | 8.09  | 0    |

|       |           |           |      |      |     |        |       |      |
|-------|-----------|-----------|------|------|-----|--------|-------|------|
| chr1  | 193092909 | 193094376 | 1468 | 870  | 66  | 106.31 | 5.3   | 0.06 |
| chr1  | 193136226 | 193137213 | 988  | 455  | 46  | 73.95  | 5.22  | 0.13 |
| chr1  | 193141262 | 193142105 | 844  | 561  | 40  | 83.69  | 5.99  | 0.06 |
| chr1  | 193220641 | 193222275 | 1635 | 660  | 89  | 146.49 | 5.71  | 0.09 |
| chr1  | 193729816 | 193731194 | 1379 | 898  | 53  | 86.68  | 6.47  | 0.07 |
| chr1  | 193778479 | 193779635 | 1157 | 528  | 50  | 111.51 | 7.04  | 0.06 |
| chr1  | 193813474 | 193814532 | 1059 | 493  | 45  | 126.55 | 8.09  | 0.07 |
| chr1  | 193902146 | 193902994 | 849  | 469  | 31  | 71.44  | 6.07  | 0.15 |
| chr1  | 193915899 | 193916904 | 1006 | 470  | 50  | 102.98 | 6.65  | 0.06 |
| chr1  | 194998992 | 195000293 | 1302 | 575  | 70  | 77.88  | 5.59  | 0.12 |
| chr10 | 4521646   | 4522932   | 1287 | 452  | 59  | 88.91  | 5.22  | 0.07 |
| chr10 | 4539966   | 4541300   | 1335 | 895  | 51  | 77.66  | 5.29  | 0.12 |
| chr10 | 5151313   | 5152624   | 1312 | 809  | 53  | 93.99  | 5.5   | 0.07 |
| chr10 | 5915543   | 5916490   | 948  | 527  | 36  | 74.81  | 6.99  | 0.13 |
| chr10 | 5958127   | 5959600   | 1474 | 1236 | 59  | 225.62 | 10.49 | 0    |
| chr10 | 7382161   | 7383668   | 1508 | 1049 | 68  | 123.18 | 5.39  | 0.07 |
| chr10 | 7386943   | 7387694   | 752  | 350  | 30  | 73.26  | 6.16  | 0.13 |
| chr10 | 7400490   | 7401533   | 1044 | 512  | 44  | 102.39 | 6.25  | 0.06 |
| chr10 | 7512166   | 7513246   | 1081 | 462  | 93  | 333.54 | 15.07 | 0    |
| chr10 | 7560995   | 7562306   | 1312 | 432  | 57  | 106.37 | 5.15  | 0.06 |
| chr10 | 7674620   | 7676830   | 2211 | 459  | 102 | 277.62 | 7.28  | 0    |
| chr10 | 8238045   | 8238791   | 747  | 186  | 28  | 101.47 | 7.51  | 0.08 |
| chr10 | 8601280   | 8603480   | 2201 | 1203 | 88  | 206.04 | 7.39  | 0    |
| chr10 | 8605302   | 8606286   | 985  | 346  | 39  | 99.42  | 5.39  | 0.08 |
| chr10 | 10277324  | 10278386  | 1063 | 509  | 54  | 83.91  | 5.71  | 0.06 |
| chr10 | 11000298  | 11001395  | 1098 | 706  | 49  | 84.84  | 4.3   | 0.06 |
| chr10 | 12588688  | 12589602  | 915  | 466  | 37  | 134.54 | 8.37  | 0.08 |
| chr10 | 12641911  | 12643021  | 1111 | 554  | 57  | 155.86 | 10.2  | 0.11 |
| chr10 | 12727567  | 12728909  | 1343 | 702  | 67  | 108.74 | 5.31  | 0.06 |
| chr10 | 12912197  | 12913294  | 1098 | 404  | 49  | 85.98  | 4.05  | 0.07 |
| chr10 | 13272422  | 13273437  | 1016 | 523  | 40  | 143.37 | 10.26 | 0.09 |
| chr10 | 13684036  | 13684997  | 962  | 417  | 37  | 101.1  | 6.74  | 0.08 |
| chr10 | 14424830  | 14425715  | 886  | 460  | 35  | 130.55 | 11.65 | 0.08 |
| chr10 | 17441602  | 17444682  | 3081 | 1468 | 207 | 428.19 | 8.09  | 0    |
| chr10 | 17667453  | 17668380  | 928  | 485  | 37  | 105.45 | 7.64  | 0.06 |
| chr10 | 17741900  | 17743389  | 1490 | 947  | 59  | 106.62 | 5.39  | 0.06 |
| chr10 | 19311342  | 19312395  | 1054 | 548  | 70  | 219.24 | 12.45 | 0    |
| chr10 | 19824079  | 19824930  | 852  | 366  | 29  | 76.09  | 6.19  | 0.12 |
| chr10 | 20031260  | 20033220  | 1961 | 1380 | 133 | 284.69 | 6.47  | 0    |
| chr10 | 20444430  | 20445329  | 900  | 437  | 33  | 70.76  | 8.09  | 0.16 |
| chr10 | 20671666  | 20673092  | 1427 | 801  | 64  | 129.99 | 4.85  | 0.08 |
| chr10 | 21710977  | 21715034  | 4058 | 3289 | 251 | 569.75 | 8.09  | 0    |
| chr10 | 21868194  | 21868803  | 610  | 373  | 23  | 70.87  | 7.61  | 0.16 |
| chr10 | 22021405  | 22022712  | 1308 | 357  | 51  | 80.45  | 4.36  | 0.1  |

|       |          |          |      |      |     |        |       |      |
|-------|----------|----------|------|------|-----|--------|-------|------|
| chr10 | 22450662 | 22452229 | 1568 | 707  | 81  | 210.15 | 6.86  | 0    |
| chr10 | 23868699 | 23870224 | 1526 | 453  | 62  | 85.88  | 4.91  | 0.07 |
| chr10 | 29081370 | 29082342 | 973  | 529  | 43  | 119.88 | 7.69  | 0.07 |
| chr10 | 30337528 | 30338784 | 1257 | 818  | 63  | 165.93 | 9.85  | 0.06 |
| chr10 | 30530475 | 30531428 | 954  | 441  | 43  | 103.4  | 11.26 | 0.06 |
| chr10 | 33670511 | 33671485 | 975  | 474  | 36  | 82.11  | 6.47  | 0.1  |
| chr10 | 33739088 | 33740167 | 1080 | 579  | 44  | 86.43  | 6.41  | 0.07 |
| chr10 | 33926030 | 33927543 | 1514 | 914  | 76  | 259.4  | 11.24 | 0    |
| chr10 | 34000225 | 34000903 | 679  | 300  | 26  | 79.7   | 8.09  | 0.1  |
| chr10 | 34001651 | 34002868 | 1218 | 397  | 60  | 125.73 | 5.09  | 0.07 |
| chr10 | 36856413 | 36861174 | 4762 | 2749 | 266 | 859.15 | 9.63  | 0    |
| chr10 | 39450772 | 39451795 | 1024 | 485  | 41  | 132.9  | 9.67  | 0.08 |
| chr10 | 39618217 | 39619644 | 1428 | 1027 | 70  | 187.68 | 6.99  | 0    |
| chr10 | 39977040 | 39978992 | 1953 | 1371 | 85  | 140.93 | 6.26  | 0.09 |
| chr10 | 40021802 | 40022619 | 818  | 214  | 55  | 148.46 | 7.68  | 0.1  |
| chr10 | 40068160 | 40069694 | 1535 | 721  | 73  | 250.61 | 7.61  | 0    |
| chr10 | 40602545 | 40603708 | 1164 | 648  | 51  | 97.03  | 5.91  | 0.08 |
| chr10 | 41022548 | 41023517 | 970  | 465  | 37  | 93.69  | 6.39  | 0.07 |
| chr10 | 41104938 | 41106077 | 1140 | 316  | 38  | 77.94  | 4.81  | 0.12 |
| chr10 | 41169698 | 41170769 | 1072 | 537  | 50  | 130.35 | 9.19  | 0.08 |
| chr10 | 41195680 | 41197922 | 2243 | 516  | 91  | 179.01 | 5.63  | 0    |
| chr10 | 41238584 | 41239677 | 1094 | 585  | 52  | 89.6   | 5.93  | 0.07 |
| chr10 | 41529387 | 41530325 | 939  | 477  | 39  | 80.28  | 5.73  | 0.1  |
| chr10 | 41606743 | 41607848 | 1106 | 589  | 56  | 116.79 | 7.22  | 0.07 |
| chr10 | 41994736 | 41995891 | 1156 | 696  | 45  | 90.6   | 5.75  | 0.07 |
| chr10 | 41995977 | 41998518 | 2542 | 2087 | 116 | 149.04 | 5.02  | 0.1  |
| chr10 | 42197701 | 42198961 | 1261 | 578  | 66  | 156.62 | 7.16  | 0.11 |
| chr10 | 42221161 | 42222569 | 1409 | 819  | 75  | 162.84 | 5.49  | 0.06 |
| chr10 | 42398366 | 42399216 | 851  | 400  | 39  | 144.66 | 12.14 | 0.09 |
| chr10 | 42940584 | 42941790 | 1207 | 513  | 56  | 121.14 | 8.09  | 0.07 |
| chr10 | 43260168 | 43261115 | 948  | 553  | 35  | 85.76  | 5.96  | 0.07 |
| chr10 | 43621058 | 43622153 | 1096 | 621  | 44  | 123.67 | 8.54  | 0.07 |
| chr10 | 43722885 | 43724007 | 1123 | 689  | 46  | 75.79  | 5.29  | 0.14 |
| chr10 | 43987708 | 43988787 | 1080 | 506  | 54  | 168.84 | 10.92 | 0.06 |
| chr10 | 44308989 | 44309742 | 754  | 357  | 27  | 76.21  | 6.66  | 0.12 |
| chr10 | 50311853 | 50312996 | 1144 | 504  | 52  | 146.68 | 8.09  | 0.09 |
| chr10 | 52136798 | 52137879 | 1082 | 522  | 42  | 130.46 | 8.6   | 0.08 |
| chr10 | 53316167 | 53317212 | 1046 | 568  | 44  | 122.61 | 8.94  | 0.07 |
| chr10 | 53348987 | 53350192 | 1206 | 333  | 41  | 76.75  | 4.18  | 0.12 |
| chr10 | 53795017 | 53796229 | 1213 | 790  | 54  | 148.07 | 7.69  | 0.1  |
| chr10 | 57205801 | 57206782 | 982  | 441  | 35  | 87.83  | 6.29  | 0.07 |
| chr10 | 57251617 | 57252771 | 1155 | 612  | 61  | 155.11 | 8.09  | 0.1  |
| chr10 | 57514016 | 57515288 | 1273 | 558  | 65  | 128.23 | 6.42  | 0.08 |
| chr10 | 57717180 | 57718883 | 1704 | 916  | 84  | 189.92 | 7.77  | 0    |

|       |          |          |      |      |     |        |       |      |
|-------|----------|----------|------|------|-----|--------|-------|------|
| chr10 | 57785255 | 57786914 | 1660 | 944  | 81  | 117.27 | 4.41  | 0.07 |
| chr10 | 57908786 | 57910593 | 1808 | 814  | 91  | 137.55 | 6.86  | 0.09 |
| chr10 | 58683767 | 58685292 | 1526 | 774  | 71  | 159.15 | 6.74  | 0.11 |
| chr10 | 58785618 | 58786580 | 963  | 520  | 41  | 124.22 | 11.24 | 0.07 |
| chr10 | 59341825 | 59343042 | 1218 | 546  | 68  | 151.59 | 6.97  | 0.1  |
| chr10 | 59681159 | 59682140 | 982  | 463  | 38  | 111.34 | 8.57  | 0.06 |
| chr10 | 59739994 | 59743538 | 3545 | 495  | 255 | 554.2  | 8.54  | 0    |
| chr10 | 59743547 | 59744417 | 871  | 559  | 38  | 78.6   | 5.46  | 0.12 |
| chr10 | 59744454 | 59746176 | 1723 | 886  | 91  | 205.37 | 5.76  | 0    |
| chr10 | 59746506 | 59748391 | 1886 | 728  | 81  | 149.67 | 6.12  | 0.1  |
| chr10 | 59765886 | 59768631 | 2746 | 2192 | 149 | 406.57 | 7.36  | 0    |
| chr10 | 59809126 | 59810465 | 1340 | 447  | 61  | 95.69  | 5.66  | 0.08 |
| chr10 | 59810532 | 59812441 | 1910 | 1488 | 80  | 200.21 | 6.55  | 0    |
| chr10 | 59824772 | 59825767 | 996  | 520  | 43  | 82.01  | 4.98  | 0.1  |
| chr10 | 60214859 | 60215831 | 973  | 601  | 53  | 128.99 | 8.69  | 0.08 |
| chr10 | 60608333 | 60611204 | 2872 | 1951 | 199 | 727.33 | 11.77 | 0    |
| chr10 | 60914394 | 60915944 | 1551 | 1170 | 70  | 100.26 | 5.22  | 0.08 |
| chr10 | 61911925 | 61913139 | 1215 | 627  | 80  | 118.5  | 7.54  | 0.07 |
| chr10 | 62254186 | 62255702 | 1517 | 970  | 75  | 154.43 | 7.19  | 0.1  |
| chr10 | 62382558 | 62383959 | 1402 | 811  | 76  | 169.01 | 8.67  | 0.06 |
| chr10 | 62442850 | 62443560 | 711  | 199  | 27  | 87.03  | 6.57  | 0.07 |
| chr10 | 62485697 | 62487932 | 2236 | 771  | 105 | 195.42 | 6.42  | 0    |
| chr10 | 62705937 | 62707411 | 1475 | 899  | 70  | 98.03  | 5.15  | 0.08 |
| chr10 | 62801560 | 62802200 | 641  | 208  | 25  | 78.72  | 7.14  | 0.12 |
| chr10 | 66559042 | 66560363 | 1322 | 860  | 51  | 139.07 | 6.93  | 0.09 |
| chr10 | 67011671 | 67012688 | 1018 | 574  | 41  | 90.64  | 5.88  | 0.07 |
| chr10 | 67738719 | 67741117 | 2399 | 1921 | 84  | 115.65 | 5.29  | 0.06 |
| chr10 | 67742185 | 67743280 | 1096 | 686  | 42  | 70.92  | 4.53  | 0.16 |
| chr10 | 70807024 | 70807935 | 912  | 471  | 37  | 83.9   | 5.88  | 0.06 |
| chr10 | 70810075 | 70810920 | 846  | 501  | 34  | 77.18  | 5.15  | 0.12 |
| chr10 | 72117034 | 72117922 | 889  | 410  | 43  | 113    | 8.44  | 0.06 |
| chr10 | 74979317 | 74981191 | 1875 | 732  | 108 | 388.7  | 11.8  | 0    |
| chr10 | 75129905 | 75130901 | 997  | 514  | 40  | 82.95  | 5.28  | 0.11 |
| chr10 | 75299505 | 75301131 | 1627 | 685  | 69  | 93.77  | 4.05  | 0.07 |
| chr10 | 75383503 | 75384842 | 1340 | 779  | 61  | 200.92 | 10.84 | 0    |
| chr10 | 75904711 | 75906025 | 1315 | 768  | 61  | 118.85 | 5.91  | 0.07 |
| chr10 | 75931201 | 75932229 | 1029 | 514  | 46  | 145.09 | 8.54  | 0.09 |
| chr10 | 76721367 | 76722535 | 1169 | 743  | 63  | 122.38 | 5.74  | 0.07 |
| chr10 | 77068510 | 77069826 | 1317 | 895  | 55  | 115.62 | 5.28  | 0.06 |
| chr10 | 77075834 | 77076685 | 852  | 358  | 26  | 72.64  | 9.36  | 0.15 |
| chr10 | 77084438 | 77085790 | 1353 | 500  | 57  | 94.58  | 4.79  | 0.07 |
| chr10 | 77471814 | 77473048 | 1235 | 716  | 79  | 161.46 | 6.7   | 0.11 |
| chr10 | 77647298 | 77648345 | 1048 | 529  | 44  | 71.07  | 5.49  | 0.16 |
| chr10 | 77875203 | 77876167 | 965  | 584  | 81  | 219.42 | 10.71 | 0    |

|       |          |          |      |      |     |        |       |      |
|-------|----------|----------|------|------|-----|--------|-------|------|
| chr10 | 77887931 | 77889621 | 1691 | 566  | 96  | 207.14 | 7.39  | 0    |
| chr10 | 79131412 | 79133160 | 1749 | 1138 | 94  | 136.32 | 4.72  | 0.08 |
| chr10 | 79144044 | 79145227 | 1184 | 658  | 58  | 177.18 | 8.94  | 0.07 |
| chr10 | 79229541 | 79230545 | 1005 | 535  | 46  | 100.07 | 6.47  | 0.08 |
| chr10 | 79303640 | 79304638 | 999  | 540  | 43  | 165.46 | 11.88 | 0.06 |
| chr10 | 79316178 | 79318375 | 2198 | 1150 | 134 | 214.14 | 4.68  | 0    |
| chr10 | 79371099 | 79372112 | 1014 | 438  | 57  | 130.59 | 7.25  | 0.08 |
| chr10 | 79379110 | 79380175 | 1066 | 617  | 45  | 125.59 | 7.66  | 0.07 |
| chr10 | 79389136 | 79391545 | 2410 | 544  | 103 | 271.67 | 7.71  | 0    |
| chr10 | 79422356 | 79423396 | 1041 | 566  | 47  | 79.91  | 7.53  | 0.1  |
| chr10 | 79446189 | 79448498 | 2310 | 1618 | 114 | 207.5  | 6.7   | 0    |
| chr10 | 79458918 | 79459502 | 585  | 335  | 28  | 73.57  | 7.42  | 0.13 |
| chr10 | 79478879 | 79481044 | 2166 | 1377 | 121 | 301.03 | 8.14  | 0    |
| chr10 | 79515858 | 79517540 | 1683 | 570  | 106 | 240.14 | 9.13  | 0    |
| chr10 | 79537493 | 79538569 | 1077 | 628  | 47  | 80.06  | 4.91  | 0.1  |
| chr10 | 79564957 | 79565832 | 876  | 392  | 45  | 120.14 | 11.12 | 0.07 |
| chr10 | 79577168 | 79579167 | 2000 | 1162 | 124 | 244.14 | 6.9   | 0    |
| chr10 | 79603719 | 79605523 | 1805 | 495  | 80  | 75.2   | 4.15  | 0.13 |
| chr10 | 79610532 | 79612900 | 2369 | 1841 | 150 | 342.99 | 7.57  | 0    |
| chr10 | 79620906 | 79623185 | 2280 | 1831 | 101 | 193.21 | 7.12  | 0    |
| chr10 | 79629859 | 79631592 | 1734 | 754  | 114 | 250.7  | 7.85  | 0    |
| chr10 | 79635267 | 79636317 | 1051 | 510  | 49  | 121.06 | 9.85  | 0.07 |
| chr10 | 79688849 | 79689803 | 955  | 528  | 42  | 98.11  | 5.98  | 0.08 |
| chr10 | 79711397 | 79712710 | 1314 | 480  | 87  | 170.95 | 6.34  | 0.06 |
| chr10 | 79723166 | 79724908 | 1743 | 578  | 95  | 242.5  | 7.77  | 0    |
| chr10 | 79727082 | 79728360 | 1279 | 525  | 74  | 238.14 | 8.46  | 0    |
| chr10 | 79754844 | 79755915 | 1072 | 355  | 49  | 94.39  | 5.39  | 0.07 |
| chr10 | 79782746 | 79783724 | 979  | 557  | 47  | 79.23  | 5.74  | 0.1  |
| chr10 | 79861112 | 79863063 | 1952 | 1415 | 126 | 311.12 | 7.55  | 0    |
| chr10 | 79896002 | 79897350 | 1349 | 532  | 61  | 133.48 | 6.74  | 0.08 |
| chr10 | 80023839 | 80024965 | 1127 | 602  | 52  | 125.91 | 6.33  | 0.07 |
| chr10 | 80039710 | 80041094 | 1385 | 509  | 73  | 156.72 | 6.07  | 0.11 |
| chr10 | 80052626 | 80053622 | 997  | 495  | 40  | 141.16 | 12.66 | 0.09 |
| chr10 | 80084265 | 80085905 | 1641 | 550  | 99  | 100.95 | 4.89  | 0.08 |
| chr10 | 80118838 | 80119815 | 978  | 517  | 37  | 71.32  | 5.63  | 0.15 |
| chr10 | 80126674 | 80128109 | 1436 | 419  | 56  | 106.24 | 4.57  | 0.06 |
| chr10 | 80138421 | 80141454 | 3034 | 1111 | 178 | 186.26 | 6.83  | 0    |
| chr10 | 80154656 | 80156253 | 1598 | 649  | 78  | 76.83  | 4.45  | 0.12 |
| chr10 | 80157582 | 80158792 | 1211 | 491  | 53  | 75.36  | 4.85  | 0.13 |
| chr10 | 80164057 | 80165772 | 1716 | 658  | 108 | 260.43 | 8.09  | 0    |
| chr10 | 80203486 | 80204494 | 1009 | 431  | 38  | 88.25  | 6.47  | 0.07 |
| chr10 | 80260032 | 80262083 | 2052 | 1273 | 134 | 260.52 | 5.84  | 0    |
| chr10 | 80288394 | 80289921 | 1528 | 664  | 71  | 119.77 | 5.58  | 0.07 |
| chr10 | 80392319 | 80393658 | 1340 | 265  | 70  | 134.77 | 5.12  | 0.08 |

|       |          |          |      |      |     |        |       |      |
|-------|----------|----------|------|------|-----|--------|-------|------|
| chr10 | 80499523 | 80500382 | 860  | 404  | 33  | 85.66  | 7.24  | 0.07 |
| chr10 | 80591743 | 80592759 | 1017 | 476  | 38  | 76.45  | 5.52  | 0.12 |
| chr10 | 80596694 | 80601676 | 4983 | 2618 | 292 | 933.44 | 11.03 | 0    |
| chr10 | 80629940 | 80631088 | 1149 | 504  | 58  | 132.91 | 8.4   | 0.08 |
| chr10 | 80645014 | 80646262 | 1249 | 563  | 64  | 85.26  | 5.84  | 0.07 |
| chr10 | 80653978 | 80656020 | 2043 | 1298 | 97  | 130.97 | 5.39  | 0.08 |
| chr10 | 80728649 | 80730085 | 1437 | 937  | 79  | 127.45 | 5.78  | 0.07 |
| chr10 | 80730715 | 80731397 | 683  | 331  | 30  | 77.12  | 6.2   | 0.12 |
| chr10 | 80748113 | 80749105 | 993  | 537  | 36  | 89.4   | 7.04  | 0.07 |
| chr10 | 80754912 | 80756488 | 1577 | 818  | 94  | 129.84 | 4.34  | 0.08 |
| chr10 | 80759850 | 80761819 | 1970 | 256  | 84  | 99.22  | 4.05  | 0.08 |
| chr10 | 80782743 | 80784470 | 1728 | 1111 | 106 | 207.6  | 5.47  | 0    |
| chr10 | 80812588 | 80813953 | 1366 | 733  | 95  | 394.09 | 14.16 | 0    |
| chr10 | 80818780 | 80820818 | 2039 | 1502 | 92  | 135.29 | 6.07  | 0.08 |
| chr10 | 80820967 | 80822315 | 1349 | 641  | 77  | 203.14 | 8.15  | 0    |
| chr10 | 80827298 | 80831390 | 4093 | 1748 | 339 | 547.55 | 6.47  | 0    |
| chr10 | 80892413 | 80893642 | 1230 | 717  | 54  | 140.51 | 5.5   | 0.09 |
| chr10 | 80895434 | 80897531 | 2098 | 450  | 81  | 101.93 | 4.6   | 0.05 |
| chr10 | 81007064 | 81008080 | 1017 | 197  | 38  | 81.7   | 5.01  | 0.1  |
| chr10 | 81033962 | 81034907 | 946  | 647  | 41  | 79.25  | 4.36  | 0.1  |
| chr10 | 81068315 | 81069907 | 1593 | 436  | 68  | 119.9  | 4.67  | 0.07 |
| chr10 | 82321448 | 82322416 | 969  | 514  | 37  | 87.29  | 8.05  | 0.07 |
| chr10 | 82799956 | 82800794 | 839  | 544  | 30  | 79.66  | 5.52  | 0.1  |
| chr10 | 83006057 | 83007592 | 1536 | 706  | 82  | 216.74 | 8.43  | 0    |
| chr10 | 83110885 | 83112013 | 1129 | 709  | 56  | 139.72 | 8.43  | 0.09 |
| chr10 | 83902889 | 83904165 | 1277 | 492  | 76  | 276.57 | 11.73 | 0    |
| chr10 | 84038821 | 84039801 | 981  | 533  | 38  | 99.65  | 5.19  | 0.08 |
| chr10 | 84379424 | 84380793 | 1370 | 787  | 62  | 128.01 | 5.5   | 0.08 |
| chr10 | 85379017 | 85380431 | 1415 | 799  | 61  | 92.34  | 5.02  | 0.07 |
| chr10 | 85484416 | 85485535 | 1120 | 715  | 42  | 89.38  | 5.01  | 0.07 |
| chr10 | 86167448 | 86169517 | 2070 | 722  | 109 | 175.27 | 6.62  | 0.07 |
| chr10 | 86240879 | 86242340 | 1462 | 595  | 75  | 82.93  | 4.45  | 0.11 |
| chr10 | 87293254 | 87294194 | 941  | 540  | 34  | 76.02  | 4.85  | 0.14 |
| chr10 | 87321454 | 87323884 | 2431 | 504  | 128 | 379.09 | 7.32  | 0    |
| chr10 | 88193471 | 88194778 | 1308 | 464  | 67  | 200.18 | 7.32  | 0    |
| chr10 | 88288938 | 88290010 | 1073 | 469  | 44  | 98.69  | 5.88  | 0.08 |
| chr10 | 88905609 | 88907019 | 1411 | 1014 | 60  | 98.56  | 4.91  | 0.08 |
| chr10 | 89206719 | 89208706 | 1988 | 1141 | 76  | 125.82 | 4.85  | 0.07 |
| chr10 | 90585847 | 90587467 | 1621 | 907  | 106 | 185.36 | 9.75  | 0    |
| chr10 | 90633736 | 90635142 | 1407 | 882  | 70  | 225.12 | 8.94  | 0    |
| chr10 | 90643781 | 90645400 | 1620 | 1099 | 96  | 188.1  | 7.11  | 0    |
| chr10 | 92623429 | 92624644 | 1216 | 560  | 55  | 199.77 | 8.3   | 0    |
| chr10 | 92772818 | 92773969 | 1152 | 420  | 50  | 166.16 | 8.34  | 0.06 |
| chr10 | 93150900 | 93152146 | 1247 | 822  | 46  | 155.65 | 8.16  | 0.11 |

|       |           |           |      |      |     |        |       |      |
|-------|-----------|-----------|------|------|-----|--------|-------|------|
| chr10 | 93661359  | 93662154  | 796  | 456  | 38  | 94.75  | 7.75  | 0.07 |
| chr10 | 93967739  | 93968689  | 951  | 735  | 44  | 144.6  | 7.19  | 0.09 |
| chr10 | 94150568  | 94151857  | 1290 | 723  | 55  | 82.87  | 4.46  | 0.11 |
| chr10 | 94405146  | 94407211  | 2066 | 1577 | 89  | 113.43 | 4.18  | 0.06 |
| chr10 | 94785796  | 94787026  | 1231 | 504  | 55  | 111.85 | 6.75  | 0.06 |
| chr10 | 94964129  | 94964865  | 737  | 456  | 32  | 90.57  | 8.52  | 0.07 |
| chr10 | 94976986  | 94978767  | 1782 | 771  | 80  | 249.38 | 7.4   | 0    |
| chr10 | 95026083  | 95027242  | 1160 | 636  | 53  | 159.09 | 8.94  | 0.11 |
| chr10 | 95402760  | 95403874  | 1115 | 423  | 69  | 239.11 | 10.3  | 0    |
| chr10 | 95795005  | 95796046  | 1042 | 538  | 40  | 106.48 | 6.22  | 0.06 |
| chr10 | 96078843  | 96081135  | 2293 | 828  | 175 | 680.55 | 12.31 | 0    |
| chr10 | 96082672  | 96083632  | 961  | 373  | 34  | 84.92  | 6.29  | 0.07 |
| chr10 | 98376103  | 98378259  | 2157 | 558  | 108 | 208.43 | 7.22  | 0    |
| chr10 | 98570384  | 98571293  | 910  | 451  | 34  | 84.97  | 8.09  | 0.07 |
| chr10 | 98723777  | 98726362  | 2586 | 584  | 115 | 290.55 | 8.86  | 0    |
| chr10 | 99949618  | 99950613  | 996  | 416  | 47  | 118.49 | 7.04  | 0.07 |
| chr10 | 107598554 | 107600050 | 1497 | 663  | 88  | 259.07 | 10.79 | 0    |
| chr10 | 110446294 | 110447715 | 1422 | 720  | 63  | 203.21 | 9.04  | 0    |
| chr10 | 110600780 | 110603584 | 2805 | 959  | 158 | 336.29 | 7.81  | 0    |
| chr10 | 110735160 | 110736246 | 1087 | 621  | 72  | 190.49 | 6.47  | 0    |
| chr10 | 111431613 | 111434511 | 2899 | 405  | 139 | 301.1  | 5.95  | 0    |
| chr10 | 112365463 | 112366560 | 1098 | 411  | 41  | 142.15 | 8.74  | 0.09 |
| chr10 | 114687926 | 114688986 | 1061 | 682  | 58  | 179    | 9.19  | 0    |
| chr10 | 114798764 | 114799910 | 1147 | 512  | 46  | 82.33  | 6.15  | 0.11 |
| chr10 | 114820792 | 114823027 | 2236 | 910  | 120 | 230.06 | 6.74  | 0    |
| chr10 | 116018030 | 116019159 | 1130 | 443  | 37  | 108.65 | 7.3   | 0.06 |
| chr10 | 116712006 | 116714240 | 2235 | 1125 | 249 | 1192.3 | 14.31 | 0    |
| chr10 | 116716501 | 116717758 | 1258 | 727  | 72  | 240.92 | 9.63  | 0    |
| chr10 | 116718059 | 116720243 | 2185 | 342  | 96  | 358.22 | 12.55 | 0    |
| chr10 | 116813539 | 116814477 | 939  | 475  | 51  | 215.32 | 15.68 | 0    |
| chr10 | 117146577 | 117148257 | 1681 | 1109 | 99  | 368.51 | 11.05 | 0    |
| chr10 | 117183209 | 117183986 | 778  | 378  | 25  | 79.43  | 8.74  | 0.1  |
| chr10 | 117229281 | 117230422 | 1142 | 725  | 53  | 70.45  | 5.39  | 0.16 |
| chr10 | 117281793 | 117283762 | 1970 | 1390 | 113 | 334.67 | 8.79  | 0    |
| chr10 | 117534653 | 117535518 | 866  | 298  | 31  | 73.96  | 5.51  | 0.13 |
| chr10 | 118305094 | 118306391 | 1298 | 974  | 42  | 115.46 | 8.04  | 0.06 |
| chr10 | 118676415 | 118678171 | 1757 | 628  | 86  | 163.31 | 5.49  | 0.06 |
| chr10 | 119645442 | 119646411 | 970  | 416  | 39  | 76.56  | 6.41  | 0.12 |
| chr10 | 119865410 | 119866638 | 1229 | 558  | 57  | 116.33 | 5.29  | 0.07 |
| chr10 | 120415863 | 120416895 | 1033 | 534  | 44  | 132.28 | 8.54  | 0.08 |
| chr10 | 120801659 | 120803550 | 1892 | 1489 | 81  | 74.71  | 3.6   | 0.13 |
| chr10 | 120912569 | 120913855 | 1287 | 791  | 44  | 87.33  | 5.66  | 0.07 |
| chr10 | 121022844 | 121024457 | 1614 | 1182 | 72  | 171.13 | 7.36  | 0.06 |
| chr10 | 121062845 | 121064005 | 1161 | 695  | 51  | 72.81  | 4.44  | 0.15 |

|       |           |           |      |      |     |        |       |      |
|-------|-----------|-----------|------|------|-----|--------|-------|------|
| chr10 | 122115325 | 122116647 | 1323 | 804  | 61  | 97.8   | 5.39  | 0.08 |
| chr10 | 122422149 | 122423773 | 1625 | 561  | 105 | 370.63 | 9.93  | 0    |
| chr10 | 122512982 | 122513818 | 837  | 419  | 31  | 95.2   | 7.59  | 0.07 |
| chr10 | 122633563 | 122634472 | 910  | 383  | 34  | 90.83  | 7.64  | 0.07 |
| chr10 | 124825195 | 124826986 | 1792 | 881  | 88  | 219.98 | 6.33  | 0    |
| chr10 | 126365156 | 126366047 | 892  | 374  | 33  | 87.51  | 7.64  | 0.07 |
| chr10 | 126415070 | 126416186 | 1117 | 444  | 47  | 147.37 | 8.09  | 0.1  |
| chr10 | 126500070 | 126501273 | 1204 | 533  | 66  | 77.15  | 5.78  | 0.12 |
| chr10 | 126557451 | 126558758 | 1308 | 739  | 71  | 159.15 | 9.54  | 0.11 |
| chr10 | 126601523 | 126603128 | 1606 | 751  | 85  | 272.86 | 9.71  | 0    |
| chr10 | 126648091 | 126649184 | 1094 | 531  | 55  | 139.83 | 8.43  | 0.09 |
| chr10 | 126702837 | 126703970 | 1134 | 579  | 49  | 97.35  | 6.8   | 0.08 |
| chr10 | 126726135 | 126728520 | 2386 | 1660 | 127 | 309.26 | 8.41  | 0    |
| chr10 | 126760125 | 126761257 | 1133 | 743  | 43  | 92.74  | 5.39  | 0.07 |
| chr10 | 126817035 | 126818016 | 982  | 533  | 44  | 179.91 | 15.15 | 0    |
| chr10 | 127033526 | 127035089 | 1564 | 910  | 78  | 111.77 | 5.24  | 0.06 |
| chr10 | 127057195 | 127059680 | 2486 | 2072 | 126 | 401.84 | 8.99  | 0    |
| chr10 | 127078733 | 127081084 | 2352 | 1434 | 128 | 225.89 | 6.32  | 0    |
| chr10 | 127098454 | 127099559 | 1106 | 544  | 51  | 75.04  | 5.31  | 0.13 |
| chr10 | 127102856 | 127105937 | 3082 | 1346 | 160 | 158.03 | 4.74  | 0.11 |
| chr10 | 127472082 | 127473324 | 1243 | 491  | 71  | 141.62 | 6.57  | 0.09 |
| chr10 | 127495409 | 127496929 | 1521 | 696  | 67  | 98     | 4.58  | 0.08 |
| chr10 | 127519833 | 127520949 | 1117 | 636  | 61  | 217.9  | 8.09  | 0    |
| chr10 | 127527694 | 127528681 | 988  | 436  | 36  | 86.35  | 6.39  | 0.07 |
| chr10 | 127528852 | 127530717 | 1866 | 734  | 88  | 166.57 | 6.89  | 0.06 |
| chr10 | 127613422 | 127613912 | 491  | 216  | 20  | 83.28  | 9.32  | 0.06 |
| chr10 | 127706939 | 127708061 | 1123 | 477  | 50  | 87.15  | 4.91  | 0.07 |
| chr10 | 127739501 | 127741703 | 2203 | 236  | 88  | 97.35  | 4.13  | 0.08 |
| chr10 | 127774702 | 127775619 | 918  | 459  | 32  | 93.36  | 8.76  | 0.07 |
| chr10 | 127810134 | 127810962 | 829  | 375  | 34  | 93.42  | 8.38  | 0.07 |
| chr10 | 127813507 | 127814460 | 954  | 537  | 36  | 128.02 | 7.57  | 0.08 |
| chr10 | 127846431 | 127847601 | 1171 | 436  | 62  | 150.24 | 7.16  | 0.1  |
| chr10 | 127848009 | 127849274 | 1266 | 521  | 61  | 105.18 | 5.66  | 0.06 |
| chr10 | 127895044 | 127896202 | 1159 | 572  | 63  | 150.18 | 10.19 | 0.1  |
| chr10 | 127930607 | 127931649 | 1043 | 609  | 56  | 115.07 | 5.66  | 0.06 |
| chr10 | 127935416 | 127937023 | 1608 | 345  | 82  | 157.78 | 4.74  | 0.11 |
| chr10 | 127961705 | 127963645 | 1941 | 1139 | 91  | 151.83 | 6.74  | 0.1  |
| chr10 | 127985623 | 127986539 | 917  | 672  | 61  | 158.14 | 8.61  | 0.11 |
| chr10 | 128002047 | 128003737 | 1691 | 1139 | 68  | 146.32 | 5.28  | 0.09 |
| chr10 | 128063108 | 128064240 | 1133 | 405  | 52  | 176.83 | 9.04  | 0.07 |
| chr10 | 128132542 | 128134011 | 1470 | 991  | 67  | 82.5   | 4.52  | 0.11 |
| chr10 | 128141429 | 128142741 | 1313 | 830  | 53  | 151.78 | 8.32  | 0.1  |
| chr10 | 128184429 | 128185921 | 1493 | 566  | 59  | 147.6  | 5.96  | 0.1  |
| chr10 | 128241427 | 128243240 | 1814 | 1353 | 72  | 111.78 | 5.6   | 0.06 |

|       |           |           |      |      |     |        |       |      |
|-------|-----------|-----------|------|------|-----|--------|-------|------|
| chr10 | 128258166 | 128259508 | 1343 | 883  | 59  | 117.33 | 6.15  | 0.07 |
| chr10 | 128346099 | 128347996 | 1898 | 868  | 96  | 247.53 | 7.04  | 0    |
| chr10 | 128359773 | 128360869 | 1097 | 510  | 50  | 72.28  | 6.07  | 0.15 |
| chr11 | 3189202   | 3190726   | 1525 | 594  | 68  | 153.05 | 5.63  | 0.1  |
| chr11 | 3813102   | 3814266   | 1165 | 331  | 42  | 73.52  | 4.57  | 0.13 |
| chr11 | 3863272   | 3864514   | 1243 | 447  | 60  | 189.12 | 8.94  | 0    |
| chr11 | 4086406   | 4087368   | 963  | 383  | 50  | 147.83 | 7.72  | 0.1  |
| chr11 | 4604257   | 4605218   | 962  | 465  | 36  | 78.24  | 7.32  | 0.12 |
| chr11 | 4749024   | 4750081   | 1058 | 544  | 46  | 104.54 | 7.04  | 0.06 |
| chr11 | 4911320   | 4913018   | 1699 | 1061 | 65  | 95.81  | 4.98  | 0.08 |
| chr11 | 4998195   | 5000343   | 2149 | 1262 | 132 | 304.78 | 7.55  | 0    |
| chr11 | 5344666   | 5345737   | 1072 | 384  | 36  | 88.57  | 4.13  | 0.07 |
| chr11 | 5385513   | 5386400   | 888  | 532  | 32  | 101.83 | 8.09  | 0.05 |
| chr11 | 5420398   | 5422340   | 1943 | 517  | 94  | 229.49 | 9.15  | 0    |
| chr11 | 5441692   | 5442763   | 1072 | 598  | 46  | 96.8   | 6.74  | 0.08 |
| chr11 | 5661698   | 5662851   | 1154 | 640  | 55  | 84.77  | 6.32  | 0.06 |
| chr11 | 5687727   | 5689055   | 1329 | 806  | 64  | 74.74  | 4.15  | 0.13 |
| chr11 | 5855112   | 5856255   | 1144 | 580  | 60  | 97     | 5.95  | 0.08 |
| chr11 | 6099777   | 6100754   | 978  | 363  | 55  | 80.07  | 5.6   | 0.1  |
| chr11 | 6191214   | 6192293   | 1080 | 475  | 55  | 77.33  | 6.07  | 0.12 |
| chr11 | 6288642   | 6289482   | 841  | 621  | 32  | 109.79 | 7.57  | 0.06 |
| chr11 | 6314808   | 6316781   | 1974 | 1401 | 115 | 286.4  | 7.79  | 0    |
| chr11 | 6343833   | 6344740   | 908  | 424  | 35  | 103.23 | 7.61  | 0.06 |
| chr11 | 6375917   | 6376652   | 736  | 266  | 25  | 77.92  | 9.74  | 0.12 |
| chr11 | 6428317   | 6429418   | 1102 | 530  | 48  | 108.76 | 7.04  | 0.06 |
| chr11 | 6446008   | 6447501   | 1494 | 778  | 93  | 366.22 | 9.37  | 0    |
| chr11 | 8466240   | 8467724   | 1485 | 410  | 50  | 76.6   | 5.01  | 0.12 |
| chr11 | 8523589   | 8524983   | 1395 | 470  | 68  | 171.88 | 5.63  | 0.06 |
| chr11 | 8563084   | 8564999   | 1916 | 1413 | 79  | 107.81 | 4.96  | 0.06 |
| chr11 | 8588923   | 8589886   | 964  | 309  | 39  | 105.36 | 6.81  | 0.06 |
| chr11 | 11585792  | 11586764  | 973  | 537  | 40  | 85.86  | 6.33  | 0.07 |
| chr11 | 16907657  | 16909076  | 1420 | 957  | 71  | 250.82 | 11.62 | 0    |
| chr11 | 17058656  | 17059814  | 1159 | 828  | 50  | 109.31 | 5.21  | 0.06 |
| chr11 | 17111199  | 17112724  | 1526 | 1082 | 67  | 112.96 | 5     | 0.06 |
| chr11 | 17157228  | 17158336  | 1109 | 443  | 43  | 95.52  | 5.78  | 0.08 |
| chr11 | 17852842  | 17854158  | 1317 | 998  | 50  | 105.7  | 5.78  | 0.06 |
| chr11 | 19819695  | 19820668  | 974  | 608  | 41  | 108.51 | 6.47  | 0.06 |
| chr11 | 19824178  | 19825066  | 889  | 443  | 30  | 83.92  | 7.12  | 0.06 |
| chr11 | 19825306  | 19826664  | 1359 | 934  | 47  | 89.91  | 6.28  | 0.07 |
| chr11 | 20011418  | 20013970  | 2553 | 1615 | 163 | 375.45 | 8.09  | 0    |
| chr11 | 20100431  | 20102184  | 1754 | 587  | 94  | 142.61 | 4.85  | 0.09 |
| chr11 | 20432188  | 20433062  | 875  | 532  | 31  | 84.42  | 6.66  | 0.06 |
| chr11 | 20442106  | 20443526  | 1421 | 777  | 70  | 152.24 | 7.47  | 0.1  |
| chr11 | 20640434  | 20642776  | 2343 | 1166 | 130 | 287.4  | 8.38  | 0    |

|       |          |          |      |      |     |        |       |      |
|-------|----------|----------|------|------|-----|--------|-------|------|
| chr11 | 20990738 | 20992003 | 1266 | 650  | 69  | 171.8  | 9.02  | 0.06 |
| chr11 | 21138264 | 21140063 | 1800 | 519  | 84  | 248.81 | 9.37  | 0    |
| chr11 | 21270296 | 21271617 | 1322 | 902  | 65  | 176.01 | 8.09  | 0.07 |
| chr11 | 21471682 | 21472635 | 954  | 211  | 55  | 130.8  | 5.02  | 0.08 |
| chr11 | 22186689 | 22187608 | 920  | 475  | 36  | 114.93 | 7.59  | 0.06 |
| chr11 | 22758687 | 22761088 | 2402 | 440  | 104 | 264.95 | 7.36  | 0    |
| chr11 | 22890120 | 22891068 | 949  | 357  | 49  | 106.77 | 6.65  | 0.06 |
| chr11 | 22908074 | 22909020 | 947  | 440  | 43  | 104.39 | 7.04  | 0.06 |
| chr11 | 23154914 | 23156866 | 1953 | 630  | 99  | 158.52 | 5.31  | 0.11 |
| chr11 | 23205871 | 23206781 | 911  | 563  | 48  | 182.23 | 8.29  | 0    |
| chr11 | 23565376 | 23566719 | 1344 | 485  | 71  | 317.89 | 16.02 | 0    |
| chr11 | 23669452 | 23671997 | 2546 | 1723 | 118 | 301.88 | 7.32  | 0    |
| chr11 | 23794634 | 23795691 | 1058 | 540  | 44  | 113.71 | 6.88  | 0.06 |
| chr11 | 29072290 | 29073581 | 1292 | 717  | 69  | 130.91 | 6.26  | 0.08 |
| chr11 | 29273203 | 29274269 | 1067 | 514  | 48  | 143.04 | 9.79  | 0.09 |
| chr11 | 29414559 | 29415521 | 963  | 420  | 43  | 96.52  | 7.42  | 0.08 |
| chr11 | 29447401 | 29448725 | 1325 | 885  | 54  | 184.2  | 8.63  | 0    |
| chr11 | 29591890 | 29595722 | 3833 | 976  | 163 | 374.55 | 7.72  | 0    |
| chr11 | 30548782 | 30549835 | 1054 | 515  | 48  | 136.84 | 9.3   | 0.08 |
| chr11 | 30671245 | 30672850 | 1606 | 445  | 59  | 181.61 | 10.39 | 0    |
| chr11 | 31571480 | 31572460 | 981  | 486  | 35  | 89.81  | 8.23  | 0.07 |
| chr11 | 32126195 | 32127005 | 811  | 362  | 44  | 139.07 | 11.08 | 0.09 |
| chr11 | 32432641 | 32433872 | 1232 | 794  | 44  | 99.83  | 6.81  | 0.08 |
| chr11 | 34495041 | 34495900 | 860  | 329  | 55  | 88.54  | 6.76  | 0.07 |
| chr11 | 35582550 | 35583622 | 1073 | 502  | 47  | 71.73  | 4.85  | 0.15 |
| chr11 | 35647315 | 35648019 | 705  | 453  | 26  | 84.55  | 6.26  | 0.06 |
| chr11 | 40505566 | 40506495 | 930  | 485  | 35  | 93.92  | 8.54  | 0.07 |
| chr11 | 40507558 | 40508914 | 1357 | 996  | 48  | 144.54 | 7.65  | 0.09 |
| chr11 | 43198134 | 43199288 | 1155 | 339  | 43  | 81.52  | 5.03  | 0.1  |
| chr11 | 43239317 | 43240333 | 1017 | 405  | 36  | 83.12  | 5.96  | 0.11 |
| chr11 | 43494967 | 43496078 | 1112 | 614  | 56  | 166.71 | 9.63  | 0.06 |
| chr11 | 44283281 | 44284616 | 1336 | 851  | 55  | 99.98  | 6.15  | 0.08 |
| chr11 | 46250092 | 46250987 | 896  | 436  | 32  | 95.26  | 9.73  | 0.07 |
| chr11 | 46293726 | 46294563 | 838  | 443  | 35  | 105.92 | 8.54  | 0.06 |
| chr11 | 48613028 | 48614043 | 1016 | 474  | 43  | 121.01 | 7.24  | 0.07 |
| chr11 | 48630003 | 48632548 | 2546 | 2028 | 145 | 351.45 | 10    | 0    |
| chr11 | 48646983 | 48648484 | 1502 | 996  | 87  | 286.88 | 17.09 | 0    |
| chr11 | 48666661 | 48667792 | 1132 | 496  | 54  | 71.03  | 6.24  | 0.16 |
| chr11 | 48669683 | 48670660 | 978  | 460  | 42  | 95.04  | 6.68  | 0.07 |
| chr11 | 48684228 | 48686342 | 2115 | 1604 | 92  | 216.42 | 8.95  | 0    |
| chr11 | 49016118 | 49018109 | 1992 | 1176 | 113 | 247.45 | 6.7   | 0    |
| chr11 | 49056883 | 49058283 | 1401 | 544  | 68  | 142.1  | 7.05  | 0.09 |
| chr11 | 49063669 | 49064771 | 1103 | 544  | 53  | 121.04 | 6.47  | 0.07 |
| chr11 | 49659813 | 49660726 | 914  | 488  | 46  | 79.78  | 5.06  | 0.1  |

|       |          |          |      |      |     |        |       |      |
|-------|----------|----------|------|------|-----|--------|-------|------|
| chr11 | 49944162 | 49945886 | 1725 | 646  | 84  | 127.49 | 4.8   | 0.07 |
| chr11 | 50022884 | 50024774 | 1891 | 1330 | 101 | 151.31 | 6.01  | 0.1  |
| chr11 | 50038027 | 50039194 | 1168 | 502  | 48  | 120.94 | 6.07  | 0.07 |
| chr11 | 50049734 | 50050791 | 1058 | 478  | 49  | 86.25  | 5.58  | 0.07 |
| chr11 | 50138504 | 50139885 | 1382 | 636  | 85  | 149.4  | 6.56  | 0.1  |
| chr11 | 50190341 | 50192472 | 2132 | 1021 | 116 | 494.6  | 11.32 | 0    |
| chr11 | 50243983 | 50245068 | 1086 | 510  | 62  | 199.34 | 11.03 | 0    |
| chr11 | 51075644 | 51077281 | 1638 | 944  | 78  | 98.48  | 6.07  | 0.08 |
| chr11 | 51419247 | 51421026 | 1780 | 493  | 96  | 208.06 | 6.65  | 0    |
| chr11 | 51432555 | 51433692 | 1138 | 577  | 47  | 125.59 | 6.32  | 0.07 |
| chr11 | 51501858 | 51503124 | 1267 | 706  | 66  | 99.08  | 4.62  | 0.08 |
| chr11 | 51569486 | 51570642 | 1157 | 582  | 63  | 165.83 | 8.74  | 0.06 |
| chr11 | 51576697 | 51577627 | 931  | 459  | 36  | 99.37  | 7.19  | 0.08 |
| chr11 | 51669476 | 51672686 | 3211 | 2056 | 166 | 476.38 | 11.17 | 0    |
| chr11 | 51729184 | 51730566 | 1383 | 520  | 59  | 77.93  | 5.48  | 0.12 |
| chr11 | 51809378 | 51809958 | 581  | 378  | 22  | 71.86  | 6.95  | 0.15 |
| chr11 | 51813462 | 51814628 | 1167 | 648  | 63  | 116.93 | 5.31  | 0.07 |
| chr11 | 51911452 | 51913220 | 1769 | 905  | 92  | 190.01 | 6.36  | 0    |
| chr11 | 52044909 | 52045992 | 1084 | 657  | 54  | 151.09 | 8.83  | 0.1  |
| chr11 | 52173701 | 52175160 | 1460 | 513  | 77  | 191.5  | 6.47  | 0    |
| chr11 | 52209559 | 52210499 | 941  | 382  | 38  | 80.18  | 6.33  | 0.1  |
| chr11 | 53113121 | 53115123 | 2003 | 1086 | 97  | 211.73 | 7.44  | 0    |
| chr11 | 53163446 | 53165452 | 2007 | 912  | 116 | 236.95 | 8.35  | 0    |
| chr11 | 53243675 | 53244966 | 1292 | 517  | 55  | 105.25 | 4.85  | 0.06 |
| chr11 | 53380362 | 53381447 | 1086 | 401  | 43  | 119.25 | 7.64  | 0.07 |
| chr11 | 53520126 | 53521348 | 1223 | 187  | 45  | 89.91  | 4.24  | 0.07 |
| chr11 | 53576796 | 53578003 | 1208 | 563  | 86  | 218.15 | 8.34  | 0    |
| chr11 | 53582882 | 53584351 | 1470 | 695  | 89  | 101.62 | 5.28  | 0.08 |
| chr11 | 53704791 | 53705937 | 1147 | 384  | 57  | 128.14 | 7.16  | 0.08 |
| chr11 | 53841368 | 53842883 | 1516 | 442  | 77  | 164.36 | 5.39  | 0.06 |
| chr11 | 54251217 | 54252255 | 1039 | 521  | 48  | 158.86 | 11.88 | 0.11 |
| chr11 | 54335551 | 54336784 | 1234 | 522  | 58  | 96.66  | 5.12  | 0.08 |
| chr11 | 54599771 | 54601690 | 1920 | 1381 | 81  | 93.91  | 5.06  | 0.07 |
| chr11 | 54679431 | 54680833 | 1403 | 1055 | 56  | 152.32 | 7.19  | 0.1  |
| chr11 | 54910937 | 54912129 | 1193 | 696  | 54  | 85.33  | 5.12  | 0.07 |
| chr11 | 55273880 | 55275403 | 1524 | 853  | 78  | 159.63 | 5.2   | 0.11 |
| chr11 | 55281611 | 55283721 | 2111 | 1678 | 107 | 104.1  | 4.14  | 0.06 |
| chr11 | 57331627 | 57332670 | 1044 | 467  | 47  | 105.41 | 8.43  | 0.06 |
| chr11 | 57457612 | 57459066 | 1455 | 972  | 55  | 95.31  | 5.98  | 0.07 |
| chr11 | 57822847 | 57824282 | 1436 | 1005 | 59  | 73.64  | 4.32  | 0.13 |
| chr11 | 57916958 | 57918382 | 1425 | 733  | 95  | 179.87 | 5.54  | 0    |
| chr11 | 57981387 | 57982380 | 994  | 434  | 37  | 79.47  | 4.62  | 0.1  |
| chr11 | 57984665 | 57985577 | 913  | 445  | 44  | 92.95  | 6.59  | 0.07 |
| chr11 | 58115095 | 58116473 | 1379 | 664  | 84  | 122.17 | 6.12  | 0.07 |

|       |          |          |      |      |     |        |       |      |
|-------|----------|----------|------|------|-----|--------|-------|------|
| chr11 | 58136087 | 58137502 | 1416 | 731  | 78  | 160.67 | 5.93  | 0.11 |
| chr11 | 58976333 | 58977883 | 1551 | 641  | 95  | 195.53 | 8.09  | 0    |
| chr11 | 59015396 | 59016485 | 1090 | 584  | 53  | 89.6   | 5.74  | 0.07 |
| chr11 | 59021331 | 59023190 | 1860 | 510  | 94  | 108.97 | 5.75  | 0.06 |
| chr11 | 59041101 | 59042428 | 1328 | 565  | 75  | 184.91 | 6.59  | 0    |
| chr11 | 59319113 | 59320318 | 1206 | 531  | 49  | 181.31 | 11.07 | 0    |
| chr11 | 59622499 | 59624018 | 1520 | 869  | 89  | 157.37 | 6.24  | 0.11 |
| chr11 | 59661171 | 59662142 | 972  | 428  | 42  | 144.08 | 7.49  | 0.09 |
| chr11 | 59761209 | 59762219 | 1011 | 557  | 38  | 77.11  | 5.15  | 0.12 |
| chr11 | 59928261 | 59929496 | 1236 | 705  | 55  | 84.17  | 5.93  | 0.06 |
| chr11 | 60023540 | 60024343 | 804  | 462  | 31  | 89.5   | 7.81  | 0.07 |
| chr11 | 60033684 | 60034545 | 862  | 436  | 35  | 102.63 | 8.09  | 0.06 |
| chr11 | 60229931 | 60231955 | 2025 | 556  | 108 | 196.44 | 6     | 0    |
| chr11 | 60350314 | 60352638 | 2325 | 859  | 120 | 107.42 | 4.52  | 0.06 |
| chr11 | 60540066 | 60541066 | 1001 | 576  | 53  | 124.31 | 6.59  | 0.07 |
| chr11 | 60589888 | 60591620 | 1733 | 550  | 96  | 185.29 | 8.31  | 0    |
| chr11 | 60643668 | 60644566 | 899  | 508  | 34  | 70.94  | 6.62  | 0.16 |
| chr11 | 60691829 | 60692850 | 1022 | 471  | 46  | 137.78 | 8.52  | 0.09 |
| chr11 | 60726833 | 60727637 | 805  | 395  | 30  | 76.29  | 6.39  | 0.12 |
| chr11 | 60744978 | 60746017 | 1040 | 634  | 55  | 134.72 | 7.16  | 0.08 |
| chr11 | 61220954 | 61222295 | 1342 | 531  | 64  | 96.69  | 6.83  | 0.08 |
| chr11 | 61307415 | 61308371 | 957  | 448  | 36  | 86.43  | 8.26  | 0.07 |
| chr11 | 61667380 | 61669306 | 1927 | 1291 | 136 | 611.18 | 15.15 | 0    |
| chr11 | 61743177 | 61744218 | 1042 | 491  | 54  | 184.93 | 9.79  | 0    |
| chr11 | 61818217 | 61820636 | 2420 | 752  | 127 | 246.84 | 7.53  | 0    |
| chr11 | 62094490 | 62095440 | 951  | 435  | 41  | 74.2   | 8.69  | 0.13 |
| chr11 | 62270445 | 62272565 | 2121 | 424  | 107 | 352.2  | 7.48  | 0    |
| chr11 | 62362891 | 62365739 | 2849 | 2128 | 225 | 968.56 | 12.68 | 0    |
| chr11 | 62366529 | 62367216 | 688  | 192  | 25  | 73.26  | 6.22  | 0.13 |
| chr11 | 62388812 | 62390805 | 1994 | 499  | 91  | 107.92 | 4.05  | 0.06 |
| chr11 | 62415699 | 62417439 | 1741 | 714  | 106 | 137.59 | 6.21  | 0.09 |
| chr11 | 62692546 | 62693609 | 1064 | 340  | 55  | 134.98 | 6.06  | 0.08 |
| chr11 | 62944637 | 62945541 | 905  | 425  | 35  | 79.42  | 6.9   | 0.1  |
| chr11 | 68244111 | 68246033 | 1923 | 1356 | 94  | 127.15 | 4.76  | 0.07 |
| chr11 | 68281359 | 68282453 | 1095 | 643  | 41  | 72.09  | 4.92  | 0.15 |
| chr11 | 68665967 | 68667271 | 1305 | 556  | 75  | 130.87 | 6.93  | 0.08 |
| chr11 | 68714788 | 68715796 | 1009 | 450  | 45  | 75.52  | 5.3   | 0.13 |
| chr11 | 68850015 | 68851705 | 1691 | 949  | 94  | 212.68 | 8.38  | 0    |
| chr11 | 68853529 | 68855676 | 2148 | 956  | 115 | 162.57 | 6.74  | 0.12 |
| chr11 | 68858696 | 68860005 | 1310 | 721  | 58  | 92.57  | 4.46  | 0.07 |
| chr11 | 68872520 | 68873799 | 1280 | 647  | 76  | 285.49 | 13.41 | 0    |
| chr11 | 68875551 | 68877582 | 2032 | 285  | 102 | 244.37 | 8.72  | 0    |
| chr11 | 68883700 | 68884709 | 1010 | 503  | 41  | 76.16  | 6.47  | 0.12 |
| chr11 | 68886284 | 68887420 | 1137 | 643  | 47  | 112.38 | 6.16  | 0.06 |

|       |          |          |      |      |     |        |       |      |
|-------|----------|----------|------|------|-----|--------|-------|------|
| chr11 | 68911948 | 68914048 | 2101 | 569  | 97  | 97.56  | 4.59  | 0.08 |
| chr11 | 68931884 | 68932864 | 981  | 486  | 59  | 175.44 | 11.65 | 0.07 |
| chr11 | 68936774 | 68939225 | 2452 | 1374 | 103 | 236.01 | 8.39  | 0    |
| chr11 | 69179346 | 69180634 | 1289 | 721  | 60  | 129.38 | 6.47  | 0.08 |
| chr11 | 69181114 | 69182577 | 1464 | 409  | 58  | 112.19 | 5.28  | 0.06 |
| chr11 | 69222691 | 69225748 | 3058 | 648  | 141 | 266.7  | 5.01  | 0    |
| chr11 | 69231088 | 69232531 | 1444 | 854  | 52  | 105.94 | 5.01  | 0.06 |
| chr11 | 69393292 | 69395435 | 2144 | 467  | 84  | 116.66 | 4.91  | 0.07 |
| chr11 | 69475387 | 69480468 | 5082 | 4246 | 326 | 440.37 | 7.34  | 0    |
| chr11 | 69483990 | 69486608 | 2619 | 937  | 205 | 502.33 | 9.66  | 0    |
| chr11 | 69494657 | 69496336 | 1680 | 761  | 98  | 135.58 | 6.67  | 0.08 |
| chr11 | 69498516 | 69499686 | 1171 | 411  | 46  | 93.55  | 5.39  | 0.07 |
| chr11 | 69508376 | 69510010 | 1635 | 1124 | 90  | 225.65 | 9.13  | 0    |
| chr11 | 69570818 | 69573229 | 2412 | 1272 | 216 | 684.53 | 18.88 | 0    |
| chr11 | 69579424 | 69580372 | 949  | 574  | 39  | 138.54 | 10.25 | 0.09 |
| chr11 | 69650721 | 69652530 | 1810 | 1201 | 85  | 169.67 | 6.53  | 0.06 |
| chr11 | 69659571 | 69660599 | 1029 | 414  | 45  | 92.06  | 6.8   | 0.07 |
| chr11 | 69714264 | 69715644 | 1381 | 953  | 62  | 126.55 | 6.15  | 0.07 |
| chr11 | 69726954 | 69728345 | 1392 | 746  | 86  | 267.84 | 9.1   | 0    |
| chr11 | 69733042 | 69735860 | 2819 | 1818 | 149 | 181.29 | 4.9   | 0    |
| chr11 | 69793324 | 69795485 | 2162 | 985  | 111 | 251.66 | 7.16  | 0    |
| chr11 | 69803972 | 69805751 | 1780 | 542  | 108 | 190.16 | 6.52  | 0    |
| chr11 | 69808621 | 69811335 | 2715 | 2139 | 170 | 414    | 8.34  | 0    |
| chr11 | 70033784 | 70035322 | 1539 | 995  | 74  | 124.33 | 6.74  | 0.07 |
| chr11 | 70050522 | 70052064 | 1543 | 885  | 82  | 118.2  | 4.94  | 0.07 |
| chr11 | 70245341 | 70247988 | 2648 | 767  | 195 | 458.7  | 7.17  | 0    |
| chr11 | 70265012 | 70268209 | 3198 | 766  | 154 | 220.14 | 6.19  | 0    |
| chr11 | 70272277 | 70273860 | 1584 | 883  | 80  | 208.53 | 8.09  | 0    |
| chr11 | 70338361 | 70339508 | 1148 | 519  | 45  | 107.58 | 6.47  | 0.06 |
| chr11 | 70353100 | 70354435 | 1336 | 510  | 68  | 212.59 | 8.09  | 0    |
| chr11 | 70375929 | 70376917 | 989  | 533  | 41  | 113.28 | 8.52  | 0.06 |
| chr11 | 70428365 | 70429203 | 839  | 416  | 30  | 77.5   | 8.09  | 0.12 |
| chr11 | 70459697 | 70461973 | 2277 | 737  | 117 | 299.56 | 7.99  | 0    |
| chr11 | 70466318 | 70469996 | 3679 | 1771 | 249 | 635.36 | 9.71  | 0    |
| chr11 | 70481652 | 70483410 | 1759 | 1100 | 100 | 131.5  | 4.45  | 0.08 |
| chr11 | 70493146 | 70493896 | 751  | 551  | 35  | 74.52  | 6.99  | 0.13 |
| chr11 | 70500602 | 70501954 | 1353 | 547  | 70  | 199.97 | 7.36  | 0    |
| chr11 | 70513405 | 70514573 | 1169 | 312  | 45  | 86.26  | 4.57  | 0.07 |
| chr11 | 70577511 | 70578646 | 1136 | 515  | 55  | 87.09  | 5.06  | 0.07 |
| chr11 | 70782505 | 70783994 | 1490 | 924  | 71  | 147.15 | 6.22  | 0.09 |
| chr11 | 70796012 | 70796836 | 825  | 464  | 32  | 79.35  | 8.09  | 0.1  |
| chr11 | 70817436 | 70818450 | 1015 | 633  | 49  | 82.82  | 6.26  | 0.11 |
| chr11 | 70832243 | 70834002 | 1760 | 1192 | 96  | 142.67 | 5.39  | 0.09 |
| chr11 | 70957849 | 70958502 | 654  | 194  | 24  | 81.43  | 7.01  | 0.1  |

|       |          |          |      |      |     |         |       |      |
|-------|----------|----------|------|------|-----|---------|-------|------|
| chr11 | 72254308 | 72255256 | 949  | 485  | 40  | 74.42   | 7.47  | 0.13 |
| chr11 | 72419992 | 72422336 | 2345 | 741  | 108 | 82.75   | 3.75  | 0.11 |
| chr11 | 72503049 | 72504397 | 1349 | 463  | 62  | 110.46  | 5.2   | 0.06 |
| chr11 | 72608537 | 72610212 | 1676 | 1161 | 97  | 237.07  | 5.9   | 0    |
| chr11 | 72860951 | 72861889 | 939  | 447  | 42  | 89.62   | 7.77  | 0.07 |
| chr11 | 72990160 | 72991117 | 958  | 347  | 44  | 86.7    | 5.39  | 0.07 |
| chr11 | 74537341 | 74538615 | 1275 | 728  | 81  | 254.5   | 11.12 | 0    |
| chr11 | 74642932 | 74644992 | 2061 | 495  | 124 | 233.33  | 5.24  | 0    |
| chr11 | 74651074 | 74652769 | 1696 | 1165 | 91  | 217.86  | 6.24  | 0    |
| chr11 | 74738805 | 74740068 | 1264 | 805  | 64  | 118.26  | 6.19  | 0.07 |
| chr11 | 74991749 | 74992851 | 1103 | 549  | 55  | 106.8   | 8.37  | 0.06 |
| chr11 | 75003439 | 75004437 | 999  | 518  | 41  | 117.71  | 8     | 0.07 |
| chr11 | 75267491 | 75268591 | 1101 | 579  | 46  | 98.98   | 6.68  | 0.08 |
| chr11 | 75271779 | 75277096 | 5318 | 3314 | 286 | 406.83  | 6.47  | 0    |
| chr11 | 75322081 | 75324762 | 2682 | 2084 | 154 | 265.68  | 5.95  | 0    |
| chr11 | 75343489 | 75348982 | 5494 | 1742 | 423 | 1032.67 | 9.25  | 0    |
| chr11 | 75349803 | 75350792 | 990  | 264  | 38  | 78.96   | 4.39  | 0.1  |
| chr11 | 75384087 | 75385570 | 1484 | 734  | 68  | 89.5    | 4.41  | 0.07 |
| chr11 | 75386093 | 75388005 | 1913 | 778  | 83  | 130.16  | 4.33  | 0.08 |
| chr11 | 75401097 | 75402226 | 1130 | 504  | 59  | 81.7    | 6.12  | 0.1  |
| chr11 | 75443766 | 75445128 | 1363 | 812  | 82  | 173.93  | 7.59  | 0.07 |
| chr11 | 75464586 | 75465933 | 1348 | 847  | 52  | 112.62  | 6.19  | 0.06 |
| chr11 | 75466955 | 75468121 | 1167 | 547  | 51  | 131.98  | 7.82  | 0.08 |
| chr11 | 75469007 | 75470043 | 1037 | 461  | 47  | 126.82  | 8.9   | 0.07 |
| chr11 | 75492424 | 75493824 | 1401 | 981  | 63  | 85.74   | 5.06  | 0.07 |
| chr11 | 75545822 | 75547604 | 1783 | 470  | 78  | 214.02  | 7.69  | 0    |
| chr11 | 76056871 | 76057786 | 916  | 384  | 50  | 164.11  | 12.33 | 0.06 |
| chr11 | 76307572 | 76309399 | 1828 | 705  | 82  | 150.97  | 6.78  | 0.1  |
| chr11 | 76435531 | 76436793 | 1263 | 738  | 47  | 86.44   | 5.15  | 0.07 |
| chr11 | 76659079 | 76661020 | 1942 | 1447 | 85  | 186.7   | 6.43  | 0    |
| chr11 | 76758648 | 76759752 | 1105 | 557  | 51  | 185.52  | 11.63 | 0    |
| chr11 | 76891354 | 76892577 | 1224 | 527  | 87  | 175.62  | 8.09  | 0.07 |
| chr11 | 77161516 | 77162263 | 748  | 280  | 28  | 94.78   | 9.82  | 0.07 |
| chr11 | 77304255 | 77305159 | 905  | 465  | 34  | 70.27   | 5.88  | 0.16 |
| chr11 | 77420298 | 77422006 | 1709 | 1047 | 97  | 272.69  | 8.09  | 0    |
| chr11 | 77498976 | 77501165 | 2190 | 703  | 119 | 181.24  | 8.55  | 0    |
| chr11 | 77599146 | 77600332 | 1187 | 670  | 57  | 93.44   | 5.74  | 0.07 |
| chr11 | 77606536 | 77607428 | 893  | 414  | 49  | 140.03  | 8.43  | 0.09 |
| chr11 | 77794903 | 77798759 | 3857 | 423  | 204 | 301.28  | 5.24  | 0    |
| chr11 | 77893424 | 77894441 | 1018 | 461  | 56  | 192.8   | 12.54 | 0    |
| chr11 | 77996373 | 77997506 | 1134 | 562  | 46  | 130.19  | 7.19  | 0.08 |
| chr11 | 78058786 | 78060031 | 1246 | 367  | 59  | 88.51   | 5.29  | 0.07 |
| chr11 | 78074731 | 78076139 | 1409 | 884  | 68  | 239.45  | 10.53 | 0    |
| chr11 | 78141587 | 78142503 | 917  | 367  | 44  | 120.46  | 7.72  | 0.07 |

|       |          |          |      |      |     |        |       |      |
|-------|----------|----------|------|------|-----|--------|-------|------|
| chr11 | 78325131 | 78326212 | 1082 | 661  | 45  | 149.26 | 8.6   | 0.1  |
| chr11 | 78348725 | 78350371 | 1647 | 1297 | 74  | 98.38  | 5.56  | 0.08 |
| chr11 | 78363921 | 78364893 | 973  | 408  | 37  | 76.69  | 5.88  | 0.12 |
| chr11 | 78510538 | 78511578 | 1041 | 466  | 44  | 123.3  | 9.79  | 0.07 |
| chr11 | 79067186 | 79068653 | 1468 | 917  | 87  | 131.24 | 7.68  | 0.08 |
| chr11 | 79091758 | 79092621 | 864  | 472  | 33  | 70.2   | 5.52  | 0.16 |
| chr11 | 79118891 | 79120047 | 1157 | 712  | 43  | 84.15  | 4.78  | 0.06 |
| chr11 | 79152563 | 79153690 | 1128 | 340  | 51  | 120.54 | 5.98  | 0.07 |
| chr11 | 79336496 | 79337750 | 1255 | 724  | 64  | 164.03 | 8.8   | 0.06 |
| chr11 | 79517200 | 79518660 | 1461 | 922  | 79  | 117.96 | 4.94  | 0.07 |
| chr11 | 79775559 | 79776400 | 842  | 324  | 33  | 72.76  | 5.52  | 0.15 |
| chr11 | 79806979 | 79807751 | 773  | 451  | 27  | 79.41  | 6.07  | 0.1  |
| chr11 | 79894014 | 79895170 | 1157 | 378  | 63  | 124.27 | 6.79  | 0.07 |
| chr11 | 79955026 | 79956219 | 1194 | 787  | 49  | 95.81  | 5.73  | 0.08 |
| chr11 | 79967192 | 79969575 | 2384 | 455  | 106 | 215.84 | 7.75  | 0    |
| chr11 | 80191089 | 80191985 | 897  | 358  | 47  | 164.82 | 12.77 | 0.06 |
| chr11 | 80196263 | 80197392 | 1130 | 578  | 59  | 141.11 | 8.4   | 0.09 |
| chr11 | 82577425 | 82578563 | 1139 | 492  | 51  | 119.01 | 7.04  | 0.07 |
| chr11 | 82594131 | 82595491 | 1361 | 386  | 56  | 101.48 | 5.5   | 0.08 |
| chr11 | 82703544 | 82704442 | 899  | 566  | 33  | 86.68  | 7.64  | 0.07 |
| chr11 | 82877373 | 82881072 | 3700 | 2873 | 180 | 415.38 | 8.6   | 0    |
| chr11 | 83037628 | 83038522 | 895  | 338  | 41  | 95.88  | 7.08  | 0.08 |
| chr11 | 83084369 | 83086274 | 1906 | 486  | 78  | 215.38 | 9.34  | 0    |
| chr11 | 83115671 | 83116869 | 1199 | 485  | 57  | 108.12 | 7.22  | 0.06 |
| chr11 | 83431835 | 83432408 | 574  | 330  | 22  | 85.24  | 8.16  | 0.07 |
| chr11 | 83462520 | 83463514 | 995  | 586  | 44  | 97.15  | 5.39  | 0.08 |
| chr11 | 83566899 | 83567794 | 896  | 539  | 38  | 71.99  | 4.36  | 0.15 |
| chr11 | 83942724 | 83943568 | 845  | 571  | 28  | 71.52  | 6.19  | 0.15 |
| chr11 | 84326565 | 84327633 | 1069 | 550  | 57  | 74.76  | 5.19  | 0.13 |
| chr11 | 84631136 | 84633548 | 2413 | 1904 | 108 | 120.66 | 5.47  | 0.07 |
| chr11 | 84642300 | 84643024 | 725  | 307  | 39  | 111.9  | 7.42  | 0.06 |
| chr11 | 84682844 | 84684985 | 2142 | 1171 | 110 | 372.16 | 8.89  | 0    |
| chr11 | 84692958 | 84693919 | 962  | 375  | 39  | 105.62 | 7.24  | 0.06 |
| chr11 | 84729290 | 84730199 | 910  | 534  | 34  | 84.97  | 8.09  | 0.07 |
| chr11 | 84952887 | 84954285 | 1399 | 838  | 63  | 114.88 | 4.79  | 0.06 |
| chr11 | 85047786 | 85049254 | 1469 | 946  | 73  | 187.87 | 8.09  | 0    |
| chr11 | 85123934 | 85125192 | 1259 | 731  | 57  | 158.59 | 6.88  | 0.11 |
| chr11 | 85165674 | 85167158 | 1485 | 422  | 77  | 181.81 | 8.22  | 0    |
| chr11 | 86070577 | 86071523 | 947  | 535  | 35  | 105.39 | 9.1   | 0.06 |
| chr11 | 86297197 | 86298890 | 1694 | 946  | 100 | 185.58 | 6.19  | 0    |
| chr11 | 86357756 | 86358945 | 1190 | 546  | 55  | 75.92  | 5.39  | 0.14 |
| chr11 | 86392047 | 86393561 | 1515 | 1031 | 71  | 135.84 | 5.69  | 0.08 |
| chr11 | 86393616 | 86401265 | 7650 | 5775 | 447 | 619.82 | 7.36  | 0    |
| chr11 | 86497074 | 86498092 | 1019 | 486  | 51  | 100.56 | 5.86  | 0.08 |

|       |          |          |      |      |     |         |       |      |
|-------|----------|----------|------|------|-----|---------|-------|------|
| chr11 | 86569945 | 86572539 | 2595 | 1117 | 207 | 716.98  | 10.19 | 0    |
| chr11 | 86899867 | 86900706 | 840  | 509  | 36  | 126.23  | 9.1   | 0.07 |
| chr11 | 87217525 | 87218587 | 1063 | 610  | 45  | 93.17   | 6.41  | 0.07 |
| chr11 | 87240123 | 87240840 | 718  | 399  | 25  | 76.93   | 6.79  | 0.12 |
| chr11 | 87404611 | 87406257 | 1647 | 585  | 105 | 247.13  | 7.57  | 0    |
| chr11 | 87550348 | 87551426 | 1079 | 531  | 49  | 83.57   | 5.86  | 0.06 |
| chr11 | 87562028 | 87563750 | 1723 | 1022 | 100 | 164.78  | 5.39  | 0.06 |
| chr11 | 87568586 | 87574587 | 6002 | 549  | 476 | 1448.63 | 11.7  | 0    |
| chr11 | 87666397 | 87667378 | 982  | 449  | 46  | 161.52  | 10.47 | 0.11 |
| chr11 | 87800511 | 87801664 | 1154 | 456  | 40  | 105.18  | 6.82  | 0.06 |
| chr11 | 87860418 | 87862316 | 1899 | 900  | 84  | 88.56   | 3.47  | 0.07 |
| chr11 | 87880881 | 87882569 | 1689 | 1272 | 73  | 246.56  | 11.34 | 0    |
| chr11 | 88016984 | 88018348 | 1365 | 462  | 66  | 91.24   | 4.28  | 0.07 |
| chr11 | 88579368 | 88580320 | 953  | 505  | 32  | 81.2    | 9.52  | 0.1  |
| chr11 | 88815952 | 88817096 | 1145 | 799  | 49  | 85.22   | 5.09  | 0.07 |
| chr11 | 88885191 | 88886252 | 1062 | 497  | 53  | 108.99  | 7.51  | 0.06 |
| chr11 | 89846095 | 89847419 | 1325 | 402  | 42  | 74.57   | 4.92  | 0.13 |
| chr11 | 90110181 | 90111343 | 1163 | 663  | 51  | 115.74  | 7.39  | 0.07 |
| chr11 | 93746251 | 93747728 | 1478 | 1000 | 68  | 142.37  | 5.18  | 0.09 |
| chr11 | 93816775 | 93818065 | 1291 | 818  | 55  | 99.21   | 5.29  | 0.08 |
| chr11 | 93828635 | 93830544 | 1910 | 1095 | 81  | 79      | 5.17  | 0.1  |
| chr11 | 93855442 | 93858023 | 2582 | 1194 | 119 | 127.14  | 4.27  | 0.07 |
| chr11 | 94071525 | 94073295 | 1771 | 1253 | 108 | 359.13  | 14.71 | 0    |
| chr11 | 94183017 | 94184065 | 1049 | 393  | 45  | 127.95  | 7.66  | 0.08 |
| chr11 | 94188789 | 94189886 | 1098 | 428  | 46  | 155.38  | 8.71  | 0.11 |
| chr11 | 94490456 | 94491568 | 1113 | 498  | 50  | 117.46  | 8.09  | 0.07 |
| chr11 | 94537257 | 94539169 | 1913 | 462  | 85  | 132.37  | 3.94  | 0.08 |
| chr11 | 94850557 | 94853519 | 2963 | 1746 | 147 | 382.06  | 8.09  | 0    |
| chr11 | 94853588 | 94855148 | 1561 | 726  | 78  | 146.2   | 5.58  | 0.09 |
| chr11 | 94855200 | 94856287 | 1088 | 609  | 47  | 130.86  | 6.67  | 0.08 |
| chr11 | 94867662 | 94868715 | 1054 | 403  | 41  | 97      | 6.41  | 0.08 |
| chr11 | 95119682 | 95121282 | 1601 | 1090 | 69  | 70.71   | 3.7   | 0.16 |
| chr11 | 95170476 | 95172101 | 1626 | 653  | 88  | 123.78  | 3.94  | 0.07 |
| chr11 | 95245472 | 95246655 | 1184 | 569  | 81  | 212.23  | 9.4   | 0    |
| chr11 | 95549437 | 95550450 | 1014 | 454  | 45  | 118.29  | 7.71  | 0.07 |
| chr11 | 95573016 | 95575687 | 2672 | 517  | 112 | 144.54  | 5.39  | 0.09 |
| chr11 | 95691508 | 95692919 | 1412 | 927  | 71  | 115.97  | 4.55  | 0.07 |
| chr11 | 95719707 | 95721210 | 1504 | 848  | 76  | 233.84  | 8.9   | 0    |
| chr11 | 95895438 | 95896848 | 1411 | 815  | 73  | 304.89  | 14.02 | 0    |
| chr11 | 95926157 | 95927266 | 1110 | 536  | 50  | 148.59  | 9.37  | 0.1  |
| chr11 | 96180002 | 96180632 | 631  | 464  | 21  | 71.47   | 6.41  | 0.15 |
| chr11 | 96690692 | 96692080 | 1389 | 815  | 73  | 89.74   | 5.19  | 0.07 |
| chr11 | 96827952 | 96829535 | 1584 | 1109 | 73  | 200.64  | 7.21  | 0    |
| chr11 | 96838017 | 96839538 | 1522 | 810  | 89  | 237.04  | 7.16  | 0    |

|       |           |           |      |      |     |        |       |      |
|-------|-----------|-----------|------|------|-----|--------|-------|------|
| chr11 | 96902531  | 96903572  | 1042 | 530  | 44  | 148.59 | 13.15 | 0.1  |
| chr11 | 97010866  | 97012685  | 1820 | 686  | 92  | 172.94 | 5.58  | 0.07 |
| chr11 | 97047874  | 97050520  | 2647 | 1781 | 165 | 367.75 | 6.79  | 0    |
| chr11 | 97170475  | 97171812  | 1338 | 509  | 65  | 183.3  | 9.25  | 0    |
| chr11 | 97223160  | 97224054  | 895  | 398  | 33  | 76.21  | 8.09  | 0.12 |
| chr11 | 97512444  | 97513202  | 759  | 527  | 27  | 75.11  | 6.15  | 0.13 |
| chr11 | 97513579  | 97514587  | 1009 | 284  | 38  | 82.6   | 4.62  | 0.11 |
| chr11 | 97520298  | 97522390  | 2093 | 950  | 95  | 149.58 | 5.3   | 0.1  |
| chr11 | 97563349  | 97565266  | 1918 | 513  | 85  | 101.74 | 5.64  | 0.08 |
| chr11 | 97605142  | 97607059  | 1918 | 1479 | 86  | 133.87 | 5.86  | 0.08 |
| chr11 | 97627387  | 97628532  | 1146 | 502  | 81  | 212.46 | 11.63 | 0    |
| chr11 | 97643204  | 97644334  | 1131 | 606  | 71  | 208.77 | 9.65  | 0    |
| chr11 | 97658148  | 97658819  | 672  | 264  | 28  | 77.53  | 5.66  | 0.12 |
| chr11 | 97660458  | 97661646  | 1189 | 905  | 52  | 153.4  | 6.12  | 0.1  |
| chr11 | 97690404  | 97692192  | 1789 | 1048 | 79  | 76.78  | 5.25  | 0.12 |
| chr11 | 97744458  | 97745599  | 1142 | 517  | 47  | 88.26  | 5.73  | 0.07 |
| chr11 | 97848803  | 97850699  | 1897 | 1425 | 147 | 555.08 | 12.35 | 0    |
| chr11 | 97887456  | 97888687  | 1232 | 770  | 66  | 85.44  | 4.15  | 0.07 |
| chr11 | 98010379  | 98011305  | 927  | 465  | 37  | 127.6  | 10.18 | 0.07 |
| chr11 | 98054287  | 98055151  | 865  | 459  | 42  | 123.7  | 7.71  | 0.07 |
| chr11 | 98063284  | 98065132  | 1849 | 1208 | 117 | 238.23 | 5.71  | 0    |
| chr11 | 98219126  | 98220289  | 1164 | 510  | 47  | 113.19 | 6.35  | 0.06 |
| chr11 | 98261167  | 98262247  | 1081 | 458  | 45  | 75.83  | 5.39  | 0.14 |
| chr11 | 98448137  | 98449045  | 909  | 457  | 43  | 79.82  | 8.93  | 0.1  |
| chr11 | 98543066  | 98544449  | 1384 | 802  | 70  | 194.78 | 9.93  | 0    |
| chr11 | 98634628  | 98635696  | 1069 | 751  | 45  | 72.73  | 4.05  | 0.15 |
| chr11 | 98649900  | 98651085  | 1186 | 505  | 51  | 119.64 | 6.62  | 0.07 |
| chr11 | 98655555  | 98656956  | 1402 | 964  | 63  | 172.15 | 6.07  | 0.07 |
| chr11 | 98657324  | 98658502  | 1179 | 593  | 51  | 131.11 | 7.46  | 0.08 |
| chr11 | 98670652  | 98671729  | 1078 | 532  | 44  | 134.42 | 11.42 | 0.08 |
| chr11 | 98724408  | 98725499  | 1092 | 517  | 45  | 74.58  | 6.29  | 0.13 |
| chr11 | 98820556  | 98822106  | 1551 | 527  | 66  | 90.81  | 4.32  | 0.07 |
| chr11 | 98901033  | 98903568  | 2536 | 1450 | 122 | 259.88 | 6.47  | 0    |
| chr11 | 98903808  | 98905108  | 1301 | 801  | 55  | 81.64  | 5.86  | 0.1  |
| chr11 | 99091223  | 99092692  | 1470 | 467  | 69  | 284.05 | 13.98 | 0    |
| chr11 | 100180558 | 100182780 | 2223 | 1208 | 122 | 266.65 | 8.96  | 0    |
| chr11 | 100301886 | 100302629 | 744  | 473  | 28  | 72.95  | 7.24  | 0.15 |
| chr11 | 100333543 | 100334542 | 1000 | 454  | 47  | 175.26 | 12.14 | 0.07 |
| chr11 | 100388572 | 100389828 | 1257 | 568  | 65  | 144.52 | 6.59  | 0.09 |
| chr11 | 100406681 | 100407511 | 831  | 286  | 37  | 75.67  | 6.53  | 0.13 |
| chr11 | 100435786 | 100437009 | 1224 | 198  | 49  | 85     | 4.29  | 0.07 |
| chr11 | 100479871 | 100481431 | 1561 | 1034 | 75  | 195.16 | 7.72  | 0    |
| chr11 | 100483790 | 100485668 | 1879 | 438  | 71  | 133.58 | 7.74  | 0.08 |
| chr11 | 100598910 | 100600090 | 1181 | 546  | 66  | 187.3  | 9.44  | 0    |

|       |           |           |      |      |     |        |       |      |
|-------|-----------|-----------|------|------|-----|--------|-------|------|
| chr11 | 100711068 | 100712256 | 1189 | 500  | 50  | 162.83 | 7.45  | 0.06 |
| chr11 | 100800155 | 100801509 | 1355 | 530  | 70  | 125.97 | 6.52  | 0.07 |
| chr11 | 100869351 | 100871345 | 1995 | 1432 | 97  | 225    | 8.09  | 0    |
| chr11 | 100943372 | 100944912 | 1541 | 626  | 63  | 86.25  | 4.18  | 0.07 |
| chr11 | 100956253 | 100957370 | 1118 | 457  | 46  | 85.67  | 5.5   | 0.07 |
| chr11 | 100980591 | 100981761 | 1171 | 538  | 52  | 84.72  | 5.02  | 0.06 |
| chr11 | 101032299 | 101032889 | 591  | 398  | 25  | 85.71  | 8.09  | 0.07 |
| chr11 | 101087033 | 101088181 | 1149 | 560  | 58  | 126.25 | 5.99  | 0.07 |
| chr11 | 101114631 | 101115591 | 961  | 437  | 34  | 114.11 | 10.49 | 0.06 |
| chr11 | 101139700 | 101140846 | 1147 | 666  | 45  | 73.18  | 4.98  | 0.13 |
| chr11 | 101176455 | 101178117 | 1663 | 866  | 83  | 280.08 | 9.89  | 0    |
| chr11 | 101285915 | 101287338 | 1424 | 546  | 69  | 104.43 | 5.76  | 0.06 |
| chr11 | 101326213 | 101327678 | 1466 | 478  | 61  | 111.29 | 5.83  | 0.06 |
| chr11 | 101328844 | 101330129 | 1286 | 406  | 45  | 105.67 | 5.81  | 0.06 |
| chr11 | 101412804 | 101415360 | 2557 | 1407 | 139 | 189.22 | 5.69  | 0    |
| chr11 | 101488758 | 101489892 | 1135 | 446  | 46  | 94.81  | 5.28  | 0.07 |
| chr11 | 101505677 | 101506603 | 927  | 439  | 31  | 98.5   | 8.09  | 0.08 |
| chr11 | 101593893 | 101594989 | 1097 | 446  | 54  | 92.89  | 5.22  | 0.07 |
| chr11 | 101844832 | 101846468 | 1637 | 1175 | 80  | 78.72  | 4.25  | 0.12 |
| chr11 | 102017105 | 102018188 | 1084 | 526  | 47  | 119.43 | 7.32  | 0.07 |
| chr11 | 102046058 | 102046974 | 917  | 692  | 45  | 113.56 | 6.07  | 0.06 |
| chr11 | 102090217 | 102091940 | 1724 | 1185 | 65  | 205.99 | 8.66  | 0    |
| chr11 | 102106076 | 102106980 | 905  | 492  | 43  | 116.68 | 7.72  | 0.07 |
| chr11 | 102145701 | 102147011 | 1311 | 494  | 64  | 72.75  | 4.47  | 0.15 |
| chr11 | 102157756 | 102159267 | 1512 | 958  | 96  | 246.17 | 6.97  | 0    |
| chr11 | 102170120 | 102171515 | 1396 | 985  | 53  | 103.97 | 5.15  | 0.06 |
| chr11 | 102177694 | 102180888 | 3195 | 1081 | 153 | 436.65 | 8.26  | 0    |
| chr11 | 102180922 | 102182188 | 1267 | 574  | 61  | 145.2  | 8.09  | 0.09 |
| chr11 | 102268233 | 102270500 | 2268 | 1691 | 107 | 211.03 | 6.84  | 0    |
| chr11 | 102289948 | 102292767 | 2820 | 1529 | 201 | 549.75 | 7.82  | 0    |
| chr11 | 102298255 | 102299468 | 1214 | 643  | 51  | 85.56  | 5.09  | 0.07 |
| chr11 | 102416934 | 102418239 | 1306 | 638  | 58  | 200.94 | 8.6   | 0    |
| chr11 | 102558470 | 102559539 | 1070 | 588  | 49  | 71.68  | 4.8   | 0.15 |
| chr11 | 102741762 | 102742963 | 1202 | 598  | 74  | 163.53 | 9.1   | 0.06 |
| chr11 | 102877947 | 102878951 | 1005 | 429  | 53  | 158.53 | 11.03 | 0.11 |
| chr11 | 102888128 | 102890408 | 2281 | 1692 | 138 | 272.11 | 6.86  | 0    |
| chr11 | 102963721 | 102964658 | 938  | 464  | 44  | 99.58  | 6.8   | 0.08 |
| chr11 | 102975987 | 102979531 | 3545 | 639  | 202 | 373.9  | 6.07  | 0    |
| chr11 | 102993050 | 102994839 | 1790 | 1135 | 98  | 211.38 | 6.25  | 0    |
| chr11 | 103032003 | 103032906 | 904  | 386  | 35  | 82.65  | 5.92  | 0.11 |
| chr11 | 103223840 | 103225217 | 1378 | 788  | 58  | 79.66  | 3.78  | 0.1  |
| chr11 | 103273430 | 103274550 | 1121 | 524  | 52  | 134.08 | 7.36  | 0.08 |
| chr11 | 103558359 | 103559752 | 1394 | 943  | 81  | 286.84 | 9.71  | 0    |
| chr11 | 103827378 | 103828770 | 1393 | 946  | 61  | 113.36 | 5.6   | 0.06 |

|       |           |           |      |      |     |        |       |      |
|-------|-----------|-----------|------|------|-----|--------|-------|------|
| chr11 | 103840189 | 103841401 | 1213 | 727  | 54  | 158.09 | 9.85  | 0.11 |
| chr11 | 104197399 | 104198026 | 628  | 304  | 21  | 71.76  | 6.98  | 0.15 |
| chr11 | 104301663 | 104304563 | 2901 | 1445 | 160 | 520.78 | 10.12 | 0    |
| chr11 | 104330169 | 104331165 | 997  | 481  | 51  | 230.5  | 12.22 | 0    |
| chr11 | 104411100 | 104412518 | 1419 | 845  | 58  | 125.16 | 6.62  | 0.07 |
| chr11 | 105042114 | 105042946 | 833  | 408  | 30  | 95.63  | 9.11  | 0.08 |
| chr11 | 105043176 | 105043907 | 732  | 316  | 26  | 79.53  | 6.66  | 0.1  |
| chr11 | 105926692 | 105927916 | 1225 | 734  | 50  | 126.94 | 7.66  | 0.07 |
| chr11 | 105944936 | 105946868 | 1933 | 557  | 96  | 157.09 | 5.74  | 0.11 |
| chr11 | 106018782 | 106019838 | 1057 | 531  | 41  | 79.09  | 6.6   | 0.1  |
| chr11 | 106020368 | 106021830 | 1463 | 1264 | 60  | 132.08 | 5.22  | 0.08 |
| chr11 | 106054395 | 106055704 | 1310 | 632  | 72  | 189.5  | 8.41  | 0    |
| chr11 | 106077303 | 106079289 | 1987 | 1031 | 114 | 409.29 | 12.69 | 0    |
| chr11 | 106116595 | 106118071 | 1477 | 497  | 62  | 121.75 | 5.73  | 0.07 |
| chr11 | 106133393 | 106134976 | 1584 | 1104 | 89  | 177.87 | 6.52  | 0.07 |
| chr11 | 106348405 | 106349672 | 1268 | 719  | 61  | 171.02 | 9.25  | 0.06 |
| chr11 | 106361433 | 106363329 | 1897 | 847  | 86  | 172.49 | 7.44  | 0.07 |
| chr11 | 106612772 | 106613962 | 1191 | 630  | 60  | 143.9  | 8.41  | 0.09 |
| chr11 | 106639929 | 106641455 | 1527 | 833  | 82  | 229.59 | 10.9  | 0    |
| chr11 | 106647660 | 106651158 | 3499 | 2139 | 248 | 793.41 | 11.82 | 0    |
| chr11 | 106680570 | 106681422 | 853  | 539  | 31  | 73.91  | 5.84  | 0.13 |
| chr11 | 106781490 | 106782783 | 1294 | 794  | 63  | 223.71 | 12.37 | 0    |
| chr11 | 106872757 | 106874681 | 1925 | 1422 | 101 | 286.03 | 13.61 | 0    |
| chr11 | 106991809 | 106992949 | 1141 | 676  | 41  | 101.61 | 5.39  | 0.08 |
| chr11 | 106993236 | 106993834 | 599  | 189  | 21  | 75.31  | 8.74  | 0.13 |
| chr11 | 107330099 | 107332285 | 2187 | 1038 | 108 | 240.39 | 5.5   | 0    |
| chr11 | 107340307 | 107341427 | 1121 | 547  | 50  | 92.53  | 7.49  | 0.07 |
| chr11 | 108872808 | 108873850 | 1043 | 341  | 200 | 245.21 | 7.79  | 0    |
| chr11 | 109222899 | 109225395 | 2497 | 1921 | 125 | 142.36 | 4.81  | 0.09 |
| chr11 | 109278534 | 109279628 | 1095 | 470  | 40  | 72.09  | 5.28  | 0.15 |
| chr11 | 109286558 | 109287870 | 1313 | 635  | 75  | 98.07  | 4.34  | 0.08 |
| chr11 | 109333490 | 109334218 | 729  | 285  | 31  | 90.6   | 6.74  | 0.07 |
| chr11 | 109334556 | 109335765 | 1210 | 554  | 64  | 179.48 | 8.09  | 0    |
| chr11 | 109511084 | 109512907 | 1824 | 1610 | 70  | 163.81 | 5.9   | 0.06 |
| chr11 | 110926840 | 110927957 | 1118 | 692  | 55  | 76.42  | 5.32  | 0.12 |
| chr11 | 113033597 | 113034504 | 908  | 469  | 40  | 144.16 | 10.75 | 0.09 |
| chr11 | 113510409 | 113511459 | 1051 | 384  | 42  | 97.49  | 6.16  | 0.08 |
| chr11 | 113544709 | 113545962 | 1254 | 680  | 53  | 107.11 | 5.39  | 0.06 |
| chr11 | 114528963 | 114530390 | 1428 | 905  | 56  | 130.53 | 9.3   | 0.08 |
| chr11 | 114536457 | 114537306 | 850  | 399  | 34  | 86.79  | 8.09  | 0.07 |
| chr11 | 114750965 | 114752509 | 1545 | 692  | 81  | 146.97 | 6.79  | 0.09 |
| chr11 | 114753161 | 114754648 | 1488 | 801  | 58  | 156.98 | 5.98  | 0.11 |
| chr11 | 114791520 | 114793445 | 1926 | 1168 | 95  | 171.46 | 6.42  | 0.06 |
| chr11 | 114794415 | 114796140 | 1726 | 1144 | 105 | 232.05 | 7.05  | 0    |

|       |           |           |      |      |     |        |       |      |
|-------|-----------|-----------|------|------|-----|--------|-------|------|
| chr11 | 114862042 | 114863384 | 1343 | 467  | 57  | 129.76 | 5.52  | 0.08 |
| chr11 | 114932073 | 114933862 | 1790 | 963  | 77  | 116.71 | 5.58  | 0.07 |
| chr11 | 115024052 | 115025402 | 1351 | 648  | 72  | 235.37 | 9.71  | 0    |
| chr11 | 115048333 | 115051686 | 3354 | 482  | 167 | 161.05 | 5.26  | 0.11 |
| chr11 | 115137768 | 115139034 | 1267 | 506  | 72  | 107.83 | 5.54  | 0.06 |
| chr11 | 115273518 | 115275582 | 2065 | 1203 | 122 | 185.92 | 5.32  | 0    |
| chr11 | 115280781 | 115281649 | 869  | 507  | 38  | 119.63 | 7.19  | 0.07 |
| chr11 | 115336419 | 115337651 | 1233 | 415  | 50  | 113.51 | 6.68  | 0.06 |
| chr11 | 115373862 | 115376249 | 2388 | 1810 | 110 | 221.64 | 10.03 | 0    |
| chr11 | 115397246 | 115398391 | 1146 | 562  | 47  | 86.82  | 6.47  | 0.07 |
| chr11 | 115425144 | 115426170 | 1027 | 507  | 49  | 90.37  | 8.65  | 0.07 |
| chr11 | 115464691 | 115465862 | 1172 | 609  | 64  | 195.66 | 10.67 | 0    |
| chr11 | 115473570 | 115474665 | 1096 | 672  | 45  | 121.53 | 6.81  | 0.07 |
| chr11 | 115489058 | 115490040 | 983  | 492  | 55  | 79.34  | 6.64  | 0.1  |
| chr11 | 115569226 | 115570264 | 1039 | 627  | 49  | 93.67  | 5.2   | 0.07 |
| chr11 | 115626367 | 115627553 | 1187 | 447  | 50  | 101.31 | 4.72  | 0.08 |
| chr11 | 115674891 | 115676744 | 1854 | 1157 | 73  | 111.59 | 5.6   | 0.06 |
| chr11 | 115794376 | 115795461 | 1086 | 537  | 50  | 73.6   | 5.56  | 0.13 |
| chr11 | 115865777 | 115866754 | 978  | 411  | 40  | 109.11 | 7.66  | 0.06 |
| chr11 | 115873446 | 115874395 | 950  | 465  | 32  | 87.76  | 8.09  | 0.07 |
| chr11 | 115881974 | 115883255 | 1282 | 773  | 50  | 84.5   | 4.85  | 0.06 |
| chr11 | 115884810 | 115886430 | 1621 | 973  | 110 | 215.36 | 8.31  | 0    |
| chr11 | 115891076 | 115892690 | 1615 | 706  | 95  | 160.77 | 4.94  | 0.11 |
| chr11 | 115938391 | 115940188 | 1798 | 1405 | 89  | 190.87 | 6.22  | 0    |
| chr11 | 115947418 | 115949347 | 1930 | 1461 | 80  | 150.13 | 7.08  | 0.1  |
| chr11 | 115970538 | 115973231 | 2694 | 563  | 146 | 455.26 | 8.17  | 0    |
| chr11 | 116059493 | 116061301 | 1809 | 1314 | 101 | 188.71 | 5.82  | 0    |
| chr11 | 116167532 | 116168670 | 1139 | 615  | 47  | 127.04 | 6.81  | 0.07 |
| chr11 | 116294712 | 116296380 | 1669 | 534  | 75  | 159.41 | 6.41  | 0.11 |
| chr11 | 116484990 | 116485997 | 1008 | 512  | 46  | 132.07 | 8.09  | 0.08 |
| chr11 | 116703800 | 116705388 | 1589 | 558  | 81  | 70.12  | 3.68  | 0.16 |
| chr11 | 116712485 | 116715868 | 3384 | 1966 | 205 | 547.41 | 9.96  | 0    |
| chr11 | 116729045 | 116730095 | 1051 | 495  | 44  | 101.48 | 5.88  | 0.08 |
| chr11 | 116937584 | 116938785 | 1202 | 538  | 58  | 146.93 | 8.44  | 0.09 |
| chr11 | 116975538 | 116977168 | 1631 | 653  | 83  | 206.55 | 8.43  | 0    |
| chr11 | 117515309 | 117516615 | 1307 | 540  | 59  | 115.25 | 5.29  | 0.06 |
| chr11 | 117640392 | 117643107 | 2716 | 694  | 121 | 217.76 | 5.49  | 0    |
| chr11 | 117709633 | 117710917 | 1285 | 728  | 75  | 232.08 | 11.96 | 0    |
| chr11 | 117847664 | 117849599 | 1936 | 387  | 71  | 89.92  | 4.52  | 0.07 |
| chr11 | 118108569 | 118110722 | 2154 | 1484 | 107 | 124.71 | 5.03  | 0.07 |
| chr11 | 118216177 | 118217030 | 854  | 664  | 36  | 115.19 | 7.06  | 0.06 |
| chr11 | 118279604 | 118280841 | 1238 | 704  | 65  | 163.09 | 8.41  | 0.06 |
| chr11 | 118319927 | 118321141 | 1215 | 585  | 58  | 88.96  | 5.56  | 0.07 |
| chr11 | 119099008 | 119100278 | 1271 | 396  | 45  | 120.5  | 6.37  | 0.07 |

|       |           |           |      |      |     |        |       |      |
|-------|-----------|-----------|------|------|-----|--------|-------|------|
| chr11 | 119160909 | 119162019 | 1111 | 337  | 45  | 112.2  | 6.47  | 0.06 |
| chr11 | 119215706 | 119217432 | 1727 | 971  | 88  | 163.49 | 4.66  | 0.06 |
| chr11 | 119250980 | 119252326 | 1347 | 653  | 73  | 82.09  | 4.43  | 0.1  |
| chr11 | 119463681 | 119464786 | 1106 | 618  | 46  | 87.09  | 5.83  | 0.07 |
| chr11 | 119774561 | 119775957 | 1397 | 844  | 65  | 96.49  | 5.39  | 0.08 |
| chr11 | 119803862 | 119804954 | 1093 | 611  | 57  | 158.89 | 10.2  | 0.11 |
| chr11 | 119959477 | 119960678 | 1202 | 785  | 60  | 72.14  | 4.26  | 0.15 |
| chr11 | 120011975 | 120013221 | 1247 | 679  | 54  | 74.4   | 4.18  | 0.13 |
| chr11 | 120091594 | 120093240 | 1647 | 931  | 59  | 123.28 | 5.75  | 0.07 |
| chr11 | 120205156 | 120206976 | 1821 | 1176 | 86  | 325.77 | 9.64  | 0    |
| chr11 | 120208473 | 120212148 | 3676 | 3224 | 212 | 716.08 | 12.14 | 0    |
| chr11 | 120239633 | 120240553 | 921  | 390  | 36  | 77.92  | 6.99  | 0.12 |
| chr11 | 120298134 | 120299412 | 1279 | 783  | 47  | 89.25  | 5.15  | 0.07 |
| chr11 | 120318808 | 120319844 | 1037 | 543  | 51  | 134.06 | 9.15  | 0.08 |
| chr11 | 120328487 | 120329518 | 1032 | 554  | 47  | 90.57  | 6.59  | 0.07 |
| chr11 | 120345256 | 120346415 | 1160 | 622  | 57  | 156.1  | 9.19  | 0.11 |
| chr11 | 120352830 | 120354460 | 1631 | 411  | 65  | 109.86 | 5.5   | 0.06 |
| chr11 | 120371832 | 120372479 | 648  | 321  | 25  | 88.61  | 8.63  | 0.07 |
| chr11 | 120409891 | 120411632 | 1742 | 1267 | 71  | 123.2  | 5.5   | 0.07 |
| chr11 | 120433626 | 120435276 | 1651 | 574  | 92  | 190.02 | 7.55  | 0    |
| chr11 | 120437654 | 120438871 | 1218 | 804  | 44  | 73.55  | 5.49  | 0.13 |
| chr11 | 120440726 | 120443956 | 3231 | 2243 | 166 | 262.06 | 7.33  | 0    |
| chr11 | 120459292 | 120460535 | 1244 | 675  | 65  | 221.13 | 11.07 | 0    |
| chr11 | 120478809 | 120479721 | 913  | 437  | 48  | 107.5  | 8.96  | 0.06 |
| chr11 | 120485401 | 120486859 | 1459 | 892  | 67  | 148.33 | 6.41  | 0.1  |
| chr11 | 120490482 | 120492397 | 1916 | 502  | 88  | 106.15 | 3.81  | 0.06 |
| chr11 | 120493423 | 120495365 | 1943 | 569  | 118 | 376.5  | 9.98  | 0    |
| chr11 | 120533925 | 120535120 | 1196 | 431  | 58  | 156.11 | 8.09  | 0.11 |
| chr11 | 120657149 | 120658282 | 1134 | 559  | 58  | 184.63 | 10.92 | 0    |
| chr11 | 120851820 | 120853041 | 1222 | 668  | 60  | 126.99 | 6.53  | 0.07 |
| chr11 | 121089872 | 121091129 | 1258 | 703  | 59  | 128.8  | 6.8   | 0.08 |
| chr11 | 121097568 | 121099208 | 1641 | 1011 | 85  | 104.84 | 4.47  | 0.06 |
| chr11 | 121120440 | 121121595 | 1156 | 743  | 50  | 128.8  | 8.13  | 0.08 |
| chr11 | 121215016 | 121216342 | 1327 | 747  | 108 | 351.18 | 16.72 | 0    |
| chr11 | 121563238 | 121565453 | 2216 | 586  | 151 | 364.65 | 9.61  | 0    |
| chr12 | 3235007   | 3236307   | 1301 | 746  | 88  | 192.87 | 7.17  | 0    |
| chr12 | 3426318   | 3427954   | 1637 | 398  | 70  | 74.98  | 3.09  | 0.13 |
| chr12 | 3855748   | 3856930   | 1183 | 473  | 55  | 121.32 | 6.41  | 0.07 |
| chr12 | 3861004   | 3862834   | 1831 | 1436 | 76  | 143.72 | 6.15  | 0.09 |
| chr12 | 4082232   | 4083432   | 1201 | 809  | 51  | 82     | 4.62  | 0.1  |
| chr12 | 4599435   | 4600157   | 723  | 361  | 30  | 97.39  | 8.99  | 0.08 |
| chr12 | 4823590   | 4824657   | 1068 | 531  | 48  | 120.06 | 6.62  | 0.07 |
| chr12 | 4923663   | 4925429   | 1767 | 543  | 92  | 273.81 | 8.86  | 0    |
| chr12 | 8503507   | 8504932   | 1426 | 454  | 55  | 134.38 | 7.24  | 0.08 |

|       |          |          |      |      |     |        |       |      |
|-------|----------|----------|------|------|-----|--------|-------|------|
| chr12 | 8506272  | 8507522  | 1251 | 540  | 79  | 145.75 | 6.34  | 0.09 |
| chr12 | 8680309  | 8681736  | 1428 | 517  | 71  | 183.26 | 10.9  | 0    |
| chr12 | 8928169  | 8929344  | 1176 | 695  | 63  | 95.13  | 5.84  | 0.07 |
| chr12 | 9036410  | 9037425  | 1016 | 511  | 52  | 167.28 | 10.92 | 0.06 |
| chr12 | 10397184 | 10398503 | 1320 | 939  | 70  | 152.16 | 5.49  | 0.1  |
| chr12 | 11272180 | 11273465 | 1286 | 471  | 53  | 85.65  | 5.09  | 0.07 |
| chr12 | 16595961 | 16596753 | 793  | 537  | 31  | 100.89 | 8.6   | 0.08 |
| chr12 | 16900444 | 16902527 | 2084 | 960  | 107 | 197.69 | 6.74  | 0    |
| chr12 | 17006319 | 17008001 | 1683 | 661  | 99  | 387.78 | 14.38 | 0    |
| chr12 | 17550967 | 17551958 | 992  | 490  | 39  | 95.43  | 8.5   | 0.08 |
| chr12 | 17888189 | 17889145 | 957  | 439  | 33  | 99.66  | 10.79 | 0.08 |
| chr12 | 21378895 | 21380177 | 1283 | 551  | 65  | 202.9  | 8.09  | 0    |
| chr12 | 21422849 | 21424076 | 1228 | 479  | 66  | 146.97 | 5.2   | 0.09 |
| chr12 | 25335448 | 25337006 | 1559 | 480  | 73  | 155.62 | 6.47  | 0.11 |
| chr12 | 25779989 | 25782001 | 2013 | 1055 | 114 | 239.53 | 6.24  | 0    |
| chr12 | 25782779 | 25785155 | 2377 | 1012 | 111 | 296.18 | 7.89  | 0    |
| chr12 | 25785312 | 25786193 | 882  | 386  | 38  | 97.9   | 7.29  | 0.08 |
| chr12 | 29319984 | 29321383 | 1400 | 972  | 66  | 114.94 | 5.3   | 0.06 |
| chr12 | 29359867 | 29360973 | 1107 | 609  | 56  | 167.55 | 7.32  | 0.06 |
| chr12 | 32318853 | 32320084 | 1232 | 789  | 52  | 196.96 | 12.14 | 0    |
| chr12 | 32633800 | 32635535 | 1736 | 536  | 99  | 284.72 | 9.93  | 0    |
| chr12 | 32745109 | 32746138 | 1030 | 196  | 37  | 92.25  | 5.61  | 0.07 |
| chr12 | 33063160 | 33065051 | 1892 | 1236 | 104 | 219.12 | 7.25  | 0    |
| chr12 | 33504299 | 33506160 | 1862 | 984  | 87  | 229.06 | 6.93  | 0    |
| chr12 | 33638189 | 33639330 | 1142 | 635  | 46  | 73.12  | 4.79  | 0.13 |
| chr12 | 33832024 | 33833131 | 1108 | 402  | 46  | 81.73  | 5.6   | 0.1  |
| chr12 | 35731004 | 35732901 | 1898 | 938  | 102 | 219.02 | 6.65  | 0    |
| chr12 | 36883008 | 36884772 | 1765 | 998  | 62  | 103.08 | 4.05  | 0.06 |
| chr12 | 40763519 | 40764521 | 1003 | 414  | 45  | 85.33  | 5.99  | 0.07 |
| chr12 | 40948867 | 40950575 | 1709 | 473  | 78  | 104.99 | 4.78  | 0.06 |
| chr12 | 41171984 | 41173103 | 1120 | 532  | 57  | 113.59 | 5.02  | 0.06 |
| chr12 | 45310409 | 45311789 | 1381 | 540  | 71  | 181.2  | 8.76  | 0    |
| chr12 | 45369543 | 45371052 | 1510 | 699  | 66  | 173.73 | 6.47  | 0.07 |
| chr12 | 52448632 | 52449682 | 1051 | 510  | 47  | 88.11  | 6.29  | 0.07 |
| chr12 | 52478152 | 52479089 | 938  | 395  | 34  | 111.11 | 8.31  | 0.06 |
| chr12 | 52791907 | 52793714 | 1808 | 468  | 83  | 214.35 | 6.93  | 0    |
| chr12 | 52929918 | 52931381 | 1464 | 580  | 77  | 275.07 | 9.44  | 0    |
| chr12 | 55757049 | 55758074 | 1026 | 560  | 49  | 90.51  | 7.53  | 0.07 |
| chr12 | 55796298 | 55799415 | 3118 | 569  | 152 | 236.84 | 6     | 0    |
| chr12 | 55896084 | 55897081 | 998  | 490  | 47  | 139.51 | 8.9   | 0.09 |
| chr12 | 55963160 | 55964091 | 932  | 512  | 36  | 129.96 | 8.67  | 0.08 |
| chr12 | 56086961 | 56087832 | 872  | 360  | 29  | 85.13  | 8.04  | 0.07 |
| chr12 | 56402565 | 56404671 | 2107 | 1442 | 93  | 99.52  | 4.85  | 0.08 |
| chr12 | 56499016 | 56500448 | 1433 | 836  | 74  | 132.3  | 5.74  | 0.08 |

|       |          |          |      |      |     |        |       |      |
|-------|----------|----------|------|------|-----|--------|-------|------|
| chr12 | 56588593 | 56590309 | 1717 | 1241 | 71  | 73.36  | 3.82  | 0.13 |
| chr12 | 56591888 | 56594164 | 2277 | 1652 | 109 | 258.53 | 9.81  | 0    |
| chr12 | 57446418 | 57447322 | 905  | 413  | 30  | 75.73  | 9.04  | 0.13 |
| chr12 | 60112673 | 60113765 | 1093 | 594  | 45  | 121.93 | 7.24  | 0.07 |
| chr12 | 60161876 | 60162863 | 988  | 476  | 42  | 99.47  | 5.15  | 0.08 |
| chr12 | 60167258 | 60168475 | 1218 | 557  | 52  | 106.89 | 6.07  | 0.06 |
| chr12 | 60231464 | 60232862 | 1399 | 449  | 70  | 253.39 | 8.09  | 0    |
| chr12 | 60319762 | 60321320 | 1559 | 795  | 76  | 123.36 | 5.74  | 0.07 |
| chr12 | 66066366 | 66067499 | 1134 | 194  | 48  | 104.58 | 4.57  | 0.06 |
| chr12 | 70259116 | 70261115 | 2000 | 953  | 91  | 217.86 | 8.09  | 0    |
| chr12 | 70284242 | 70285957 | 1716 | 626  | 82  | 168.4  | 6.22  | 0.06 |
| chr12 | 70297732 | 70299464 | 1733 | 519  | 73  | 141.62 | 7.42  | 0.09 |
| chr12 | 70342467 | 70343457 | 991  | 452  | 44  | 109.54 | 6.99  | 0.06 |
| chr12 | 70397196 | 70398336 | 1141 | 399  | 44  | 90.57  | 5.52  | 0.07 |
| chr12 | 70457809 | 70458535 | 727  | 263  | 30  | 72.03  | 5.88  | 0.15 |
| chr12 | 70462078 | 70463061 | 984  | 462  | 47  | 113.99 | 8.09  | 0.06 |
| chr12 | 70472375 | 70474143 | 1769 | 674  | 109 | 279.1  | 8.67  | 0    |
| chr12 | 70548684 | 70549770 | 1087 | 497  | 52  | 112.12 | 7.16  | 0.06 |
| chr12 | 70638227 | 70640130 | 1904 | 968  | 91  | 207.24 | 6.07  | 0    |
| chr12 | 71087243 | 71088785 | 1543 | 394  | 68  | 191.63 | 8.09  | 0    |
| chr12 | 71212482 | 71213244 | 763  | 362  | 26  | 71.68  | 7.31  | 0.15 |
| chr12 | 71328148 | 71329030 | 883  | 451  | 55  | 156.96 | 8.39  | 0.11 |
| chr12 | 71553585 | 71554727 | 1143 | 724  | 52  | 83.35  | 4.85  | 0.06 |
| chr12 | 71926121 | 71926986 | 866  | 388  | 35  | 90.09  | 7.28  | 0.07 |
| chr12 | 72038225 | 72039404 | 1180 | 465  | 53  | 187.1  | 12.14 | 0    |
| chr12 | 72068880 | 72071191 | 2312 | 629  | 126 | 258.99 | 7.53  | 0    |
| chr12 | 72075349 | 72076354 | 1006 | 417  | 39  | 82.38  | 6.99  | 0.11 |
| chr12 | 72115679 | 72117495 | 1817 | 849  | 98  | 149.77 | 5.78  | 0.1  |
| chr12 | 72151724 | 72152712 | 989  | 425  | 37  | 80.03  | 6.93  | 0.1  |
| chr12 | 73186033 | 73187537 | 1505 | 1140 | 80  | 164.01 | 5.58  | 0.06 |
| chr12 | 73861108 | 73862426 | 1319 | 924  | 64  | 161.72 | 8.44  | 0.11 |
| chr12 | 74387282 | 74388289 | 1008 | 416  | 50  | 108.11 | 7.49  | 0.06 |
| chr12 | 74685094 | 74686193 | 1100 | 480  | 46  | 154.09 | 10.18 | 0.1  |
| chr12 | 75008097 | 75010562 | 2466 | 995  | 120 | 148.53 | 5.09  | 0.1  |
| chr12 | 75065030 | 75066112 | 1083 | 517  | 49  | 92.95  | 6.29  | 0.07 |
| chr12 | 77469603 | 77473037 | 3435 | 797  | 215 | 817.51 | 10.95 | 0    |
| chr12 | 77504356 | 77505719 | 1364 | 829  | 74  | 191.26 | 6.8   | 0    |
| chr12 | 77633883 | 77635195 | 1313 | 710  | 61  | 155.03 | 6.62  | 0.1  |
| chr12 | 78062497 | 78063672 | 1176 | 511  | 56  | 90.75  | 5.22  | 0.07 |
| chr12 | 78339204 | 78340447 | 1244 | 687  | 55  | 105.04 | 6.22  | 0.06 |
| chr12 | 79849317 | 79850713 | 1397 | 373  | 57  | 115.4  | 5.28  | 0.06 |
| chr12 | 79962290 | 79963617 | 1328 | 861  | 61  | 119.38 | 5.22  | 0.07 |
| chr12 | 80272608 | 80274158 | 1551 | 1034 | 87  | 231.41 | 9.06  | 0    |
| chr12 | 80396767 | 80398468 | 1702 | 386  | 84  | 153.39 | 5.3   | 0.1  |

|       |          |          |      |      |     |        |       |      |
|-------|----------|----------|------|------|-----|--------|-------|------|
| chr12 | 81207376 | 81208644 | 1269 | 392  | 56  | 142.66 | 5.78  | 0.09 |
| chr12 | 81211867 | 81214682 | 2816 | 2119 | 156 | 324.48 | 7.53  | 0    |
| chr12 | 81214866 | 81217360 | 2495 | 1274 | 108 | 303.74 | 7.11  | 0    |
| chr12 | 81233143 | 81234155 | 1013 | 499  | 66  | 212.12 | 10.03 | 0    |
| chr12 | 81360888 | 81362096 | 1209 | 606  | 56  | 73.16  | 4.52  | 0.13 |
| chr12 | 81535816 | 81536508 | 693  | 330  | 27  | 83.81  | 6.19  | 0.06 |
| chr12 | 81537273 | 81538264 | 992  | 264  | 43  | 140.48 | 8.09  | 0.09 |
| chr12 | 81563893 | 81564565 | 673  | 343  | 28  | 88.11  | 6.81  | 0.07 |
| chr12 | 81891050 | 81892386 | 1337 | 668  | 66  | 123.54 | 5.58  | 0.07 |
| chr12 | 82039379 | 82040713 | 1335 | 529  | 59  | 125.5  | 6.07  | 0.07 |
| chr12 | 82046194 | 82047633 | 1440 | 319  | 123 | 479.62 | 10.89 | 0    |
| chr12 | 82585497 | 82586408 | 912  | 455  | 37  | 94.91  | 8.9   | 0.07 |
| chr12 | 82695377 | 82696523 | 1147 | 603  | 57  | 233.58 | 13.48 | 0    |
| chr12 | 82961018 | 82961764 | 747  | 385  | 28  | 86.14  | 7.4   | 0.07 |
| chr12 | 84972815 | 84973646 | 832  | 405  | 33  | 120.03 | 10.1  | 0.07 |
| chr12 | 85028665 | 85029772 | 1108 | 506  | 47  | 102.99 | 7.74  | 0.06 |
| chr12 | 85262380 | 85263356 | 977  | 464  | 40  | 96.5   | 6.93  | 0.08 |
| chr12 | 85328477 | 85329352 | 876  | 521  | 31  | 71.33  | 6.25  | 0.15 |
| chr12 | 85533669 | 85535471 | 1803 | 1311 | 85  | 128.71 | 5.74  | 0.08 |
| chr12 | 85558925 | 85560372 | 1448 | 538  | 63  | 174.96 | 6.35  | 0.07 |
| chr12 | 85625664 | 85626970 | 1307 | 822  | 58  | 98.5   | 6.07  | 0.08 |
| chr12 | 85749450 | 85750362 | 913  | 388  | 38  | 88.8   | 5.52  | 0.07 |
| chr12 | 85791411 | 85792508 | 1098 | 450  | 50  | 72.16  | 4.3   | 0.15 |
| chr12 | 86113241 | 86114870 | 1630 | 872  | 91  | 217.8  | 7.49  | 0    |
| chr12 | 86451193 | 86452351 | 1159 | 608  | 50  | 150.4  | 9.44  | 0.1  |
| chr12 | 86620785 | 86621874 | 1090 | 643  | 47  | 171.66 | 10.25 | 0.06 |
| chr12 | 86679686 | 86681525 | 1840 | 548  | 95  | 284.82 | 10.58 | 0    |
| chr12 | 86681629 | 86682637 | 1009 | 537  | 37  | 77.81  | 5.01  | 0.12 |
| chr12 | 86714725 | 86716464 | 1740 | 1327 | 83  | 169.84 | 5.6   | 0.06 |
| chr12 | 86726115 | 86727191 | 1077 | 499  | 51  | 74.48  | 4.9   | 0.13 |
| chr12 | 86812702 | 86816978 | 4277 | 2158 | 251 | 729.88 | 11.46 | 0    |
| chr12 | 86818430 | 86819547 | 1118 | 551  | 50  | 128.81 | 7.6   | 0.08 |
| chr12 | 86826660 | 86827793 | 1134 | 615  | 49  | 86.54  | 5.69  | 0.07 |
| chr12 | 87045986 | 87047121 | 1136 | 559  | 53  | 88.35  | 7.01  | 0.07 |
| chr12 | 87164976 | 87166372 | 1397 | 824  | 75  | 149.36 | 7.55  | 0.1  |
| chr12 | 87582258 | 87583942 | 1685 | 625  | 70  | 110.52 | 5.09  | 0.06 |
| chr12 | 88173925 | 88175846 | 1922 | 887  | 67  | 73.91  | 4.33  | 0.13 |
| chr12 | 88223388 | 88226345 | 2958 | 2499 | 117 | 168.33 | 6.89  | 0.06 |
| chr12 | 88228694 | 88230250 | 1557 | 600  | 71  | 190.88 | 6.74  | 0    |
| chr12 | 88235136 | 88236320 | 1185 | 401  | 41  | 90.96  | 4.95  | 0.07 |
| chr12 | 88607047 | 88608125 | 1079 | 181  | 39  | 77.94  | 4.55  | 0.12 |
| chr12 | 88783912 | 88785220 | 1309 | 357  | 52  | 125.41 | 5.7   | 0.07 |
| chr12 | 88812484 | 88813558 | 1075 | 377  | 39  | 80.08  | 6.55  | 0.1  |
| chr12 | 92826322 | 92827788 | 1467 | 483  | 79  | 299.36 | 11.22 | 0    |

|       |           |           |      |      |     |        |       |      |
|-------|-----------|-----------|------|------|-----|--------|-------|------|
| chr12 | 92827813  | 92829533  | 1721 | 526  | 110 | 366.41 | 12.66 | 0    |
| chr12 | 92830434  | 92831179  | 746  | 251  | 25  | 80.53  | 6.79  | 0.1  |
| chr12 | 93004367  | 93005191  | 825  | 583  | 37  | 78.8   | 4.77  | 0.12 |
| chr12 | 99496734  | 99497914  | 1181 | 444  | 58  | 137.07 | 6.41  | 0.08 |
| chr12 | 99503607  | 99504454  | 848  | 447  | 38  | 87.26  | 6.41  | 0.07 |
| chr12 | 100630851 | 100631754 | 904  | 521  | 33  | 92.21  | 10.95 | 0.07 |
| chr12 | 101202376 | 101204564 | 2189 | 1599 | 105 | 241.21 | 6.81  | 0    |
| chr12 | 101397171 | 101398543 | 1373 | 924  | 61  | 93.21  | 4.46  | 0.07 |
| chr12 | 101424918 | 101426881 | 1964 | 685  | 117 | 344.08 | 8.09  | 0    |
| chr12 | 101437048 | 101439287 | 2240 | 695  | 157 | 479.14 | 14.68 | 0    |
| chr12 | 102016838 | 102017909 | 1072 | 510  | 72  | 218.64 | 11.69 | 0    |
| chr12 | 102320891 | 102322421 | 1531 | 1027 | 81  | 156.71 | 8.63  | 0.11 |
| chr12 | 103213642 | 103215008 | 1367 | 633  | 70  | 130.75 | 5.39  | 0.08 |
| chr12 | 103520949 | 103521707 | 759  | 363  | 32  | 109.29 | 8.88  | 0.06 |
| chr12 | 103676525 | 103678418 | 1894 | 1348 | 89  | 149.44 | 5.3   | 0.1  |
| chr12 | 103707035 | 103708054 | 1020 | 467  | 59  | 127.84 | 7.57  | 0.08 |
| chr12 | 103884604 | 103885548 | 945  | 451  | 37  | 85.15  | 5.78  | 0.07 |
| chr12 | 103995473 | 103996912 | 1440 | 539  | 61  | 200.56 | 10.11 | 0    |
| chr12 | 104116263 | 104117163 | 901  | 558  | 38  | 138.86 | 10.79 | 0.09 |
| chr12 | 104663543 | 104664604 | 1062 | 499  | 50  | 85.32  | 5.66  | 0.07 |
| chr12 | 106922973 | 106924184 | 1212 | 785  | 48  | 101.4  | 6.25  | 0.08 |
| chr12 | 107022697 | 107023581 | 885  | 352  | 42  | 150.77 | 9.99  | 0.1  |
| chr12 | 109417052 | 109418293 | 1242 | 846  | 65  | 132.94 | 5.86  | 0.08 |
| chr12 | 110030263 | 110031559 | 1297 | 604  | 60  | 180.55 | 7.24  | 0    |
| chr12 | 110031905 | 110033229 | 1325 | 844  | 50  | 120.05 | 7.24  | 0.07 |
| chr12 | 111684319 | 111685368 | 1050 | 474  | 52  | 111.64 | 6.29  | 0.06 |
| chr12 | 111828993 | 111830575 | 1583 | 743  | 94  | 76.7   | 3.89  | 0.12 |
| chr12 | 111933900 | 111935049 | 1150 | 589  | 58  | 214.46 | 11.9  | 0    |
| chr12 | 111975623 | 111976718 | 1096 | 577  | 54  | 93.03  | 6     | 0.07 |
| chr12 | 112082452 | 112084095 | 1644 | 1114 | 80  | 128.75 | 7.57  | 0.08 |
| chr12 | 112088188 | 112089341 | 1154 | 289  | 46  | 106.86 | 5.66  | 0.06 |
| chr12 | 112216584 | 112217910 | 1327 | 1141 | 48  | 106.95 | 6.07  | 0.06 |
| chr12 | 112615492 | 112616548 | 1057 | 521  | 46  | 168.77 | 9.64  | 0.06 |
| chr12 | 112679600 | 112683011 | 3412 | 1306 | 179 | 223.47 | 6.12  | 0    |
| chr12 | 112693255 | 112694870 | 1616 | 1096 | 72  | 139.99 | 7.02  | 0.09 |
| chr12 | 112775474 | 112777729 | 2256 | 1201 | 181 | 674.98 | 10.25 | 0    |
| chr12 | 112812041 | 112813274 | 1234 | 748  | 46  | 109.81 | 7.24  | 0.06 |
| chr12 | 112915719 | 112916787 | 1069 | 547  | 47  | 102.04 | 8.09  | 0.05 |
| chr12 | 112950530 | 112951982 | 1453 | 874  | 62  | 124.72 | 6.07  | 0.07 |
| chr12 | 112996404 | 112998159 | 1756 | 568  | 97  | 197.03 | 7.28  | 0    |
| chr12 | 113855053 | 113856763 | 1711 | 1262 | 69  | 89.57  | 4.71  | 0.07 |
| chr12 | 113857595 | 113859516 | 1922 | 1516 | 95  | 138.44 | 4.9   | 0.09 |
| chr12 | 113882428 | 113883501 | 1074 | 598  | 55  | 86.42  | 5.71  | 0.07 |
| chr12 | 113926381 | 113927687 | 1307 | 360  | 51  | 87.49  | 5.73  | 0.07 |

|       |           |           |      |      |     |        |       |      |
|-------|-----------|-----------|------|------|-----|--------|-------|------|
| chr12 | 113931136 | 113932303 | 1168 | 631  | 53  | 105.71 | 7.16  | 0.06 |
| chr12 | 113998299 | 113999436 | 1138 | 751  | 42  | 81.65  | 5.52  | 0.1  |
| chr12 | 114046761 | 114047618 | 858  | 370  | 35  | 80.66  | 6.25  | 0.1  |
| chr12 | 114066835 | 114067735 | 901  | 413  | 32  | 75.67  | 5.54  | 0.13 |
| chr12 | 114238290 | 114239674 | 1385 | 842  | 71  | 132.64 | 5.39  | 0.08 |
| chr12 | 114312180 | 114313317 | 1138 | 774  | 53  | 109.77 | 4.67  | 0.06 |
| chr12 | 114336549 | 114337520 | 972  | 401  | 36  | 112.09 | 8.87  | 0.06 |
| chr12 | 117501007 | 117501768 | 762  | 461  | 30  | 72.02  | 5.39  | 0.15 |
| chr12 | 117518615 | 117520355 | 1741 | 1049 | 91  | 162.59 | 6.52  | 0.12 |
| chr12 | 119080284 | 119080909 | 626  | 369  | 21  | 72.05  | 7.57  | 0.15 |
| chr12 | 119540030 | 119541048 | 1019 | 470  | 44  | 70.23  | 5.3   | 0.16 |
| chr13 | 3536552   | 3538831   | 2280 | 1385 | 117 | 371.04 | 9.22  | 0    |
| chr13 | 5844221   | 5845392   | 1172 | 637  | 55  | 82.51  | 5.56  | 0.11 |
| chr13 | 5859643   | 5864197   | 4555 | 1218 | 259 | 700.76 | 8.76  | 0    |
| chr13 | 5869156   | 5871347   | 2192 | 1733 | 105 | 200.65 | 5.99  | 0    |
| chr13 | 8869803   | 8870949   | 1147 | 616  | 57  | 109.64 | 6.14  | 0.06 |
| chr13 | 8884517   | 8885593   | 1077 | 560  | 51  | 108.67 | 7.47  | 0.06 |
| chr13 | 8995041   | 8995984   | 944  | 391  | 38  | 70.58  | 5.83  | 0.16 |
| chr13 | 9092601   | 9093594   | 994  | 524  | 40  | 88.65  | 8.09  | 0.07 |
| chr13 | 12552992  | 12554450  | 1459 | 789  | 76  | 159.89 | 7.22  | 0.11 |
| chr13 | 12560529  | 12561506  | 978  | 398  | 38  | 75.85  | 4.92  | 0.14 |
| chr13 | 12657468  | 12658754  | 1287 | 726  | 60  | 171.89 | 8.5   | 0.06 |
| chr13 | 13615936  | 13617071  | 1136 | 211  | 43  | 80.91  | 4.57  | 0.1  |
| chr13 | 13630575  | 13631514  | 940  | 564  | 37  | 103.89 | 8.09  | 0.06 |
| chr13 | 14155550  | 14156634  | 1085 | 649  | 48  | 123.3  | 6.49  | 0.07 |
| chr13 | 17786403  | 17787724  | 1322 | 563  | 67  | 137.18 | 5.78  | 0.08 |
| chr13 | 17896459  | 17897934  | 1476 | 916  | 65  | 70.52  | 3.93  | 0.16 |
| chr13 | 18035694  | 18036647  | 954  | 482  | 43  | 146.26 | 10.47 | 0.09 |
| chr13 | 19486950  | 19488135  | 1186 | 710  | 49  | 81.33  | 5.29  | 0.1  |
| chr13 | 20181764  | 20183936  | 2173 | 693  | 121 | 257.09 | 6.7   | 0    |
| chr13 | 20299689  | 20300506  | 818  | 341  | 33  | 80.43  | 5.39  | 0.1  |
| chr13 | 21252234  | 21253728  | 1495 | 506  | 67  | 171.05 | 11.56 | 0.06 |
| chr13 | 21259096  | 21260379  | 1284 | 905  | 50  | 120.1  | 8.26  | 0.07 |
| chr13 | 21261115  | 21262090  | 976  | 409  | 38  | 76.08  | 6.33  | 0.12 |
| chr13 | 21271285  | 21273198  | 1914 | 1375 | 75  | 158.64 | 5.39  | 0.11 |
| chr13 | 21291632  | 21292586  | 955  | 522  | 55  | 136.65 | 9.54  | 0.08 |
| chr13 | 21454356  | 21455221  | 866  | 477  | 36  | 95.53  | 8.5   | 0.08 |
| chr13 | 21494041  | 21495031  | 991  | 493  | 44  | 162.19 | 12.61 | 0.11 |
| chr13 | 21545060  | 21545893  | 834  | 429  | 32  | 73.15  | 6.47  | 0.13 |
| chr13 | 21560095  | 21560876  | 782  | 430  | 41  | 192.61 | 11.07 | 0    |
| chr13 | 21870527  | 21871947  | 1421 | 902  | 56  | 94.72  | 5.83  | 0.07 |
| chr13 | 22066289  | 22067290  | 1002 | 658  | 47  | 124.25 | 8.83  | 0.07 |
| chr13 | 22142436  | 22143393  | 958  | 445  | 40  | 105.16 | 5.66  | 0.06 |
| chr13 | 23515237  | 23516842  | 1606 | 545  | 66  | 108.64 | 6.95  | 0.06 |

|       |          |          |      |      |     |        |       |      |
|-------|----------|----------|------|------|-----|--------|-------|------|
| chr13 | 23522899 | 23523855 | 957  | 468  | 36  | 78.81  | 6.93  | 0.12 |
| chr13 | 23524227 | 23525383 | 1157 | 683  | 48  | 74.88  | 4.62  | 0.13 |
| chr13 | 23529482 | 23530506 | 1025 | 494  | 50  | 162    | 13.2  | 0.11 |
| chr13 | 23610554 | 23611876 | 1323 | 361  | 68  | 172.45 | 7.69  | 0.07 |
| chr13 | 23621824 | 23624180 | 2357 | 465  | 121 | 275.08 | 9.85  | 0    |
| chr13 | 23635438 | 23636529 | 1092 | 895  | 41  | 111.81 | 8.37  | 0.06 |
| chr13 | 23643113 | 23643987 | 875  | 402  | 29  | 76.11  | 8.3   | 0.12 |
| chr13 | 23665896 | 23666497 | 602  | 402  | 28  | 116.62 | 10.28 | 0.07 |
| chr13 | 23672969 | 23674024 | 1056 | 524  | 64  | 239.7  | 15.78 | 0    |
| chr13 | 23676398 | 23677575 | 1178 | 480  | 50  | 122.79 | 7.32  | 0.07 |
| chr13 | 23712800 | 23714953 | 2154 | 784  | 118 | 368.5  | 11.23 | 0    |
| chr13 | 23789186 | 23790823 | 1638 | 1100 | 83  | 175.43 | 11.09 | 0.07 |
| chr13 | 23829680 | 23832553 | 2874 | 1959 | 183 | 520.21 | 10.27 | 0    |
| chr13 | 23848436 | 23849283 | 848  | 403  | 30  | 80.86  | 8.94  | 0.1  |
| chr13 | 23852849 | 23853900 | 1052 | 448  | 53  | 198.31 | 10.53 | 0    |
| chr13 | 24853048 | 24854426 | 1379 | 982  | 49  | 76.47  | 5.07  | 0.12 |
| chr13 | 24891676 | 24894763 | 3088 | 1450 | 214 | 588.16 | 9.21  | 0    |
| chr13 | 24895221 | 24896924 | 1704 | 754  | 69  | 144.28 | 4.78  | 0.09 |
| chr13 | 24907503 | 24909906 | 2404 | 1320 | 176 | 539.19 | 11.56 | 0    |
| chr13 | 30075620 | 30077213 | 1594 | 961  | 76  | 219.16 | 6.88  | 0    |
| chr13 | 30636626 | 30637735 | 1110 | 454  | 48  | 114.26 | 6.25  | 0.06 |
| chr13 | 30751685 | 30752702 | 1018 | 448  | 43  | 89.33  | 6.74  | 0.07 |
| chr13 | 34093730 | 34094993 | 1264 | 566  | 60  | 119.17 | 5.99  | 0.07 |
| chr13 | 34169342 | 34170469 | 1128 | 489  | 49  | 87.27  | 6.29  | 0.07 |
| chr13 | 36208754 | 36210293 | 1540 | 1045 | 81  | 147.72 | 6     | 0.1  |
| chr13 | 37869716 | 37871401 | 1686 | 608  | 93  | 215.77 | 6.52  | 0    |
| chr13 | 37917022 | 37920279 | 3258 | 2710 | 146 | 398.17 | 8.37  | 0    |
| chr13 | 37949268 | 37950312 | 1045 | 416  | 39  | 90.34  | 5.72  | 0.07 |
| chr13 | 38085457 | 38086582 | 1126 | 569  | 54  | 191.25 | 9.52  | 0    |
| chr13 | 38296403 | 38297177 | 775  | 403  | 27  | 79.08  | 10.25 | 0.1  |
| chr13 | 41096056 | 41097192 | 1137 | 638  | 45  | 74.25  | 4.98  | 0.13 |
| chr13 | 42144475 | 42145383 | 909  | 332  | 41  | 148.96 | 9.1   | 0.1  |
| chr13 | 43266282 | 43267262 | 981  | 537  | 41  | 74.98  | 6.22  | 0.13 |
| chr13 | 43493510 | 43494379 | 870  | 316  | 45  | 81.05  | 5.28  | 0.1  |
| chr13 | 43576178 | 43577717 | 1540 | 940  | 67  | 199.38 | 7.68  | 0    |
| chr13 | 43654850 | 43656134 | 1285 | 572  | 54  | 107.97 | 5.06  | 0.06 |
| chr13 | 44826370 | 44827249 | 880  | 445  | 34  | 100.28 | 7.1   | 0.08 |
| chr13 | 45484558 | 45485645 | 1088 | 595  | 68  | 199.63 | 13.07 | 0    |
| chr13 | 46058592 | 46059577 | 986  | 462  | 40  | 108.06 | 8.09  | 0.06 |
| chr13 | 46059630 | 46061051 | 1422 | 518  | 68  | 234.5  | 7.57  | 0    |
| chr13 | 46764383 | 46765288 | 906  | 464  | 35  | 74.88  | 5.88  | 0.13 |
| chr13 | 46822533 | 46823916 | 1384 | 845  | 84  | 309.65 | 18.61 | 0    |
| chr13 | 46831109 | 46832163 | 1055 | 606  | 42  | 97     | 5.01  | 0.08 |
| chr13 | 47025109 | 47026336 | 1228 | 792  | 54  | 122.18 | 6.33  | 0.07 |

|       |          |          |      |      |     |        |       |      |
|-------|----------|----------|------|------|-----|--------|-------|------|
| chr13 | 47138349 | 47139364 | 1016 | 577  | 48  | 97.36  | 7.19  | 0.08 |
| chr13 | 47200445 | 47202034 | 1590 | 1088 | 62  | 193.68 | 10.69 | 0    |
| chr13 | 48640689 | 48642426 | 1738 | 1126 | 89  | 171.1  | 5.86  | 0.06 |
| chr13 | 48966477 | 48967212 | 736  | 175  | 33  | 117.24 | 8.24  | 0.07 |
| chr13 | 48973627 | 48974562 | 936  | 412  | 45  | 94.43  | 7.19  | 0.07 |
| chr13 | 49063320 | 49064291 | 972  | 506  | 46  | 170.97 | 11.49 | 0.06 |
| chr13 | 49282543 | 49284640 | 2098 | 549  | 101 | 184.47 | 4.91  | 0    |
| chr13 | 49310538 | 49311988 | 1451 | 776  | 76  | 145.7  | 4.85  | 0.09 |
| chr13 | 49342378 | 49343840 | 1463 | 1086 | 59  | 90.47  | 6.59  | 0.07 |
| chr13 | 49402009 | 49405039 | 3031 | 2515 | 144 | 199.4  | 5.56  | 0    |
| chr13 | 49436315 | 49437372 | 1058 | 546  | 50  | 85.84  | 5.93  | 0.07 |
| chr13 | 49515915 | 49516953 | 1039 | 502  | 46  | 120.25 | 8.86  | 0.07 |
| chr13 | 49748078 | 49749180 | 1103 | 689  | 49  | 76.11  | 4.58  | 0.12 |
| chr13 | 51739919 | 51741106 | 1188 | 429  | 47  | 138.6  | 6.7   | 0.09 |
| chr13 | 51746599 | 51747532 | 934  | 539  | 40  | 76.25  | 6.53  | 0.12 |
| chr13 | 51828933 | 51830626 | 1694 | 1186 | 99  | 183.97 | 6.25  | 0    |
| chr13 | 51941520 | 51942725 | 1206 | 599  | 57  | 157.52 | 8.09  | 0.11 |
| chr13 | 52677935 | 52679364 | 1430 | 696  | 74  | 189.75 | 7.08  | 0    |
| chr13 | 53472231 | 53473354 | 1124 | 546  | 68  | 278.84 | 18.43 | 0    |
| chr13 | 54569803 | 54570577 | 775  | 372  | 34  | 77.24  | 8.43  | 0.12 |
| chr13 | 54666201 | 54667083 | 883  | 458  | 31  | 96.35  | 7.01  | 0.08 |
| chr13 | 54676099 | 54677160 | 1062 | 564  | 44  | 83.38  | 5.83  | 0.06 |
| chr13 | 54690959 | 54692112 | 1154 | 652  | 50  | 78.61  | 4.74  | 0.12 |
| chr13 | 54788253 | 54790069 | 1817 | 1336 | 100 | 222.23 | 7.22  | 0    |
| chr13 | 54794085 | 54796381 | 2297 | 1645 | 116 | 163.49 | 5.95  | 0.06 |
| chr13 | 54890385 | 54891224 | 840  | 406  | 33  | 88.15  | 6.39  | 0.07 |
| chr13 | 55206241 | 55207004 | 764  | 498  | 33  | 82.69  | 7.36  | 0.11 |
| chr13 | 55311724 | 55314491 | 2768 | 1485 | 144 | 451.7  | 8.26  | 0    |
| chr13 | 55422735 | 55423774 | 1040 | 530  | 42  | 77.09  | 6.15  | 0.12 |
| chr13 | 55463237 | 55464718 | 1482 | 895  | 89  | 149.85 | 5.69  | 0.1  |
| chr13 | 55545334 | 55546953 | 1620 | 555  | 74  | 191.96 | 8.87  | 0    |
| chr13 | 55637303 | 55638523 | 1221 | 667  | 53  | 98.9   | 7.47  | 0.08 |
| chr13 | 55723884 | 55724941 | 1058 | 492  | 45  | 126.69 | 8.52  | 0.07 |
| chr13 | 55736094 | 55736871 | 778  | 336  | 37  | 82.98  | 6.53  | 0.11 |
| chr13 | 55794065 | 55795360 | 1296 | 434  | 53  | 159.16 | 9.04  | 0.11 |
| chr13 | 55828158 | 55829237 | 1080 | 376  | 41  | 101.72 | 6.39  | 0.08 |
| chr13 | 56236517 | 56237568 | 1052 | 502  | 54  | 173.65 | 10.52 | 0.07 |
| chr13 | 56279553 | 56280615 | 1063 | 471  | 53  | 120.67 | 6.53  | 0.07 |
| chr13 | 58229526 | 58231090 | 1565 | 989  | 103 | 263.62 | 7.55  | 0    |
| chr13 | 58316578 | 58317611 | 1034 | 504  | 44  | 97.7   | 9.15  | 0.08 |
| chr13 | 58502479 | 58504903 | 2425 | 858  | 161 | 407.19 | 6.74  | 0    |
| chr13 | 58582313 | 58583198 | 886  | 417  | 32  | 89.31  | 8.6   | 0.07 |
| chr13 | 59870891 | 59872121 | 1231 | 635  | 66  | 70.03  | 4.7   | 0.16 |
| chr13 | 59923586 | 59925104 | 1519 | 842  | 81  | 326.27 | 14.66 | 0    |

|       |          |          |      |      |     |        |       |      |
|-------|----------|----------|------|------|-----|--------|-------|------|
| chr13 | 60773936 | 60775048 | 1113 | 852  | 43  | 83.45  | 4.92  | 0.06 |
| chr13 | 63065908 | 63066760 | 853  | 330  | 48  | 117.58 | 7.51  | 0.07 |
| chr13 | 63341056 | 63342602 | 1547 | 419  | 62  | 121.07 | 7.04  | 0.07 |
| chr13 | 63356554 | 63357646 | 1093 | 641  | 44  | 82.29  | 4.62  | 0.1  |
| chr13 | 63532801 | 63533495 | 695  | 495  | 28  | 90.15  | 8.18  | 0.07 |
| chr13 | 64230153 | 64231363 | 1211 | 457  | 50  | 104.65 | 5.98  | 0.06 |
| chr13 | 64253366 | 64255816 | 2451 | 330  | 102 | 188.63 | 5.73  | 0    |
| chr13 | 64262837 | 64263803 | 967  | 274  | 38  | 130.34 | 7.6   | 0.08 |
| chr13 | 64462414 | 64463148 | 735  | 469  | 26  | 78.07  | 6.57  | 0.12 |
| chr13 | 64470993 | 64472350 | 1358 | 639  | 94  | 406.1  | 17.46 | 0    |
| chr13 | 65213847 | 65214899 | 1053 | 534  | 44  | 114.37 | 8.9   | 0.06 |
| chr13 | 65341647 | 65343316 | 1670 | 1129 | 87  | 154.17 | 8.05  | 0.1  |
| chr13 | 67005605 | 67006804 | 1200 | 928  | 47  | 104.59 | 6.16  | 0.06 |
| chr13 | 67033411 | 67034864 | 1454 | 977  | 68  | 73.96  | 3.72  | 0.13 |
| chr13 | 67182030 | 67182834 | 805  | 543  | 30  | 81.5   | 5.84  | 0.1  |
| chr13 | 67653429 | 67654386 | 958  | 609  | 38  | 100.6  | 6.81  | 0.08 |
| chr13 | 67710153 | 67710994 | 842  | 496  | 35  | 136.93 | 12.82 | 0.08 |
| chr13 | 69673437 | 69674510 | 1074 | 343  | 49  | 139.67 | 7.69  | 0.09 |
| chr13 | 69750000 | 69751479 | 1480 | 877  | 80  | 145.06 | 5.56  | 0.09 |
| chr13 | 73740804 | 73741882 | 1079 | 561  | 61  | 204.05 | 11.94 | 0    |
| chr13 | 73940425 | 73941765 | 1341 | 812  | 63  | 74.16  | 3.6   | 0.13 |
| chr13 | 74198958 | 74200118 | 1161 | 697  | 46  | 143.67 | 8.54  | 0.09 |
| chr13 | 74345501 | 74347033 | 1533 | 541  | 67  | 130.36 | 6.8   | 0.08 |
| chr13 | 74396833 | 74398655 | 1823 | 1304 | 94  | 163.89 | 4.96  | 0.06 |
| chr13 | 74486860 | 74488097 | 1238 | 847  | 47  | 71.74  | 4.98  | 0.15 |
| chr13 | 74631170 | 74631971 | 802  | 390  | 29  | 72.85  | 8.22  | 0.15 |
| chr13 | 74776777 | 74777883 | 1107 | 647  | 46  | 92.43  | 4.38  | 0.07 |
| chr13 | 74907638 | 74908373 | 736  | 425  | 30  | 75.29  | 6.93  | 0.13 |
| chr13 | 75844438 | 75846088 | 1651 | 557  | 66  | 143.42 | 6.87  | 0.09 |
| chr13 | 76155153 | 76156706 | 1554 | 978  | 83  | 170.79 | 6.14  | 0.06 |
| chr13 | 77847494 | 77848581 | 1088 | 517  | 46  | 79.22  | 6.29  | 0.1  |
| chr13 | 81022052 | 81024254 | 2203 | 656  | 117 | 412.8  | 15.28 | 0    |
| chr13 | 81024312 | 81026096 | 1785 | 720  | 127 | 430.67 | 8.74  | 0    |
| chr13 | 81101929 | 81102589 | 661  | 380  | 26  | 77.05  | 6.29  | 0.12 |
| chr13 | 81922013 | 81923326 | 1314 | 920  | 45  | 78.6   | 4.2   | 0.12 |
| chr13 | 83663672 | 83664250 | 579  | 228  | 23  | 77.82  | 6.41  | 0.12 |
| chr13 | 85427463 | 85429640 | 2178 | 1323 | 120 | 321.85 | 8.43  | 0    |
| chr13 | 86185423 | 86186294 | 872  | 583  | 37  | 120.28 | 6.66  | 0.07 |
| chr13 | 90228276 | 90229943 | 1668 | 783  | 94  | 336.88 | 10.22 | 0    |
| chr13 | 91062298 | 91063407 | 1110 | 356  | 54  | 218.03 | 10.25 | 0    |
| chr13 | 91362770 | 91363950 | 1181 | 405  | 44  | 75.25  | 4.05  | 0.13 |
| chr13 | 91510061 | 91511045 | 985  | 525  | 37  | 98.27  | 6.29  | 0.08 |
| chr13 | 91599529 | 91600703 | 1175 | 670  | 57  | 123.97 | 7.78  | 0.07 |
| chr13 | 91946523 | 91947601 | 1079 | 812  | 59  | 181.87 | 7.36  | 0    |

|       |           |           |      |      |     |        |       |      |
|-------|-----------|-----------|------|------|-----|--------|-------|------|
| chr13 | 93300181  | 93301563  | 1383 | 748  | 82  | 136.26 | 6.34  | 0.08 |
| chr13 | 93380391  | 93381383  | 993  | 429  | 41  | 105.97 | 8.09  | 0.06 |
| chr13 | 93962023  | 93963137  | 1115 | 552  | 62  | 132.38 | 7.01  | 0.08 |
| chr13 | 94073205  | 94074296  | 1092 | 532  | 51  | 100.89 | 6.29  | 0.08 |
| chr13 | 94943597  | 94944899  | 1303 | 925  | 42  | 94.37  | 4.43  | 0.07 |
| chr13 | 95054701  | 95056001  | 1301 | 505  | 54  | 106.02 | 6.07  | 0.06 |
| chr13 | 95128213  | 95129360  | 1148 | 578  | 53  | 91.78  | 5.58  | 0.07 |
| chr13 | 95558718  | 95559531  | 814  | 516  | 30  | 98.68  | 7.01  | 0.08 |
| chr13 | 95745989  | 95747041  | 1053 | 690  | 44  | 129.48 | 7.64  | 0.08 |
| chr13 | 96144686  | 96145721  | 1036 | 691  | 39  | 96.4   | 5.96  | 0.08 |
| chr13 | 97312122  | 97313101  | 980  | 504  | 42  | 79.51  | 6.53  | 0.1  |
| chr13 | 97440301  | 97441649  | 1349 | 868  | 68  | 112.09 | 5.31  | 0.06 |
| chr13 | 97907466  | 97908388  | 923  | 513  | 35  | 108.41 | 10.62 | 0.06 |
| chr13 | 98010150  | 98011426  | 1277 | 687  | 57  | 97.95  | 5.2   | 0.08 |
| chr13 | 99032510  | 99033800  | 1291 | 469  | 70  | 135.68 | 7.05  | 0.08 |
| chr13 | 99086190  | 99087532  | 1343 | 897  | 58  | 224.14 | 10.49 | 0    |
| chr13 | 99584044  | 99585906  | 1863 | 1160 | 91  | 238.25 | 8.09  | 0    |
| chr13 | 99660554  | 99661150  | 597  | 399  | 22  | 82.13  | 6.99  | 0.1  |
| chr13 | 99695319  | 99696968  | 1650 | 1089 | 99  | 310.22 | 8.09  | 0    |
| chr13 | 100114154 | 100115108 | 955  | 518  | 38  | 88.98  | 6.55  | 0.07 |
| chr13 | 100873601 | 100874488 | 888  | 459  | 49  | 162.97 | 10.02 | 0.06 |
| chr13 | 101420671 | 101421937 | 1267 | 765  | 54  | 117.06 | 5.63  | 0.07 |
| chr13 | 101513631 | 101514959 | 1329 | 395  | 52  | 121.85 | 6.07  | 0.07 |
| chr13 | 101602891 | 101603897 | 1007 | 567  | 39  | 72.36  | 7.42  | 0.15 |
| chr13 | 102536750 | 102539091 | 2342 | 1231 | 105 | 244.18 | 6.99  | 0    |
| chr13 | 104709300 | 104711383 | 2084 | 1633 | 95  | 377.61 | 10.99 | 0    |
| chr13 | 104899045 | 104900082 | 1038 | 839  | 44  | 144.52 | 7.36  | 0.09 |
| chr13 | 104967642 | 104968681 | 1040 | 563  | 41  | 106.63 | 6.81  | 0.06 |
| chr13 | 105018281 | 105019442 | 1162 | 493  | 58  | 145.33 | 8.43  | 0.09 |
| chr13 | 106083684 | 106084898 | 1215 | 692  | 58  | 245.13 | 13.98 | 0    |
| chr13 | 107726510 | 107727497 | 988  | 497  | 43  | 93.18  | 8.76  | 0.07 |
| chr13 | 107736472 | 107737598 | 1127 | 564  | 56  | 103.39 | 6.7   | 0.06 |
| chr13 | 108679803 | 108682262 | 2460 | 473  | 148 | 396.78 | 8.09  | 0    |
| chr13 | 108833781 | 108835033 | 1253 | 439  | 43  | 101.44 | 5.07  | 0.08 |
| chr13 | 111184654 | 111185806 | 1153 | 634  | 66  | 139.26 | 7.31  | 0.09 |
| chr13 | 112279477 | 112281437 | 1961 | 560  | 103 | 262.82 | 7.08  | 0    |
| chr13 | 112568626 | 112569208 | 583  | 322  | 21  | 73.11  | 8.26  | 0.13 |
| chr13 | 113229881 | 113230642 | 762  | 524  | 28  | 73.69  | 6.16  | 0.13 |
| chr13 | 113253686 | 113254913 | 1228 | 679  | 60  | 181.22 | 8.9   | 0    |
| chr13 | 113717013 | 113718255 | 1243 | 577  | 50  | 107.39 | 5.52  | 0.06 |
| chr13 | 114408234 | 114409332 | 1099 | 571  | 54  | 150.27 | 9.28  | 0.1  |
| chr13 | 114425998 | 114426634 | 637  | 317  | 30  | 84.77  | 7.36  | 0.06 |
| chr13 | 114583967 | 114585289 | 1323 | 655  | 69  | 162.31 | 7.16  | 0.11 |
| chr13 | 117812945 | 117814355 | 1411 | 556  | 52  | 146.84 | 6.49  | 0.09 |

|       |           |           |      |      |     |        |       |      |
|-------|-----------|-----------|------|------|-----|--------|-------|------|
| chr13 | 120197365 | 120198413 | 1049 | 467  | 44  | 108.1  | 5.78  | 0.06 |
| chr13 | 120216932 | 120217685 | 754  | 381  | 26  | 88.37  | 8.74  | 0.07 |
| chr13 | 120250945 | 120251970 | 1026 | 568  | 42  | 138.05 | 11.12 | 0.09 |
| chr14 | 9004969   | 9005970   | 1002 | 596  | 49  | 115.61 | 6.15  | 0.06 |
| chr14 | 13116527  | 13117649  | 1123 | 571  | 55  | 115.46 | 5.69  | 0.06 |
| chr14 | 14844761  | 14845646  | 886  | 346  | 43  | 187.53 | 16.18 | 0    |
| chr14 | 15177956  | 15179125  | 1170 | 816  | 59  | 120.32 | 4.88  | 0.07 |
| chr14 | 15465300  | 15466331  | 1032 | 609  | 38  | 113.51 | 6.11  | 0.06 |
| chr14 | 17081501  | 17082466  | 966  | 408  | 40  | 117.83 | 9.44  | 0.07 |
| chr14 | 19070556  | 19071654  | 1099 | 511  | 54  | 79.15  | 4.52  | 0.1  |
| chr14 | 19164064  | 19164534  | 471  | 193  | 21  | 93.76  | 11.65 | 0.07 |
| chr14 | 20642503  | 20643886  | 1384 | 684  | 56  | 105.32 | 4.72  | 0.06 |
| chr14 | 20794993  | 20796887  | 1895 | 1407 | 74  | 178.58 | 6.39  | 0    |
| chr14 | 21166963  | 21168044  | 1082 | 582  | 57  | 113.69 | 8.36  | 0.06 |
| chr14 | 21212160  | 21213490  | 1331 | 436  | 67  | 99.46  | 5     | 0.08 |
| chr14 | 21298107  | 21299089  | 983  | 425  | 39  | 75.06  | 4.72  | 0.13 |
| chr14 | 21364795  | 21366221  | 1427 | 1003 | 56  | 198.04 | 9.32  | 0    |
| chr14 | 21459749  | 21461344  | 1596 | 580  | 74  | 123.83 | 6.14  | 0.07 |
| chr14 | 21492765  | 21494229  | 1465 | 628  | 77  | 155.83 | 6.97  | 0.11 |
| chr14 | 21513750  | 21515161  | 1412 | 499  | 77  | 190.09 | 7.47  | 0    |
| chr14 | 21526029  | 21527134  | 1106 | 558  | 45  | 73.02  | 4.49  | 0.13 |
| chr14 | 21552416  | 21554282  | 1867 | 1166 | 95  | 226.11 | 6.85  | 0    |
| chr14 | 21748140  | 21749118  | 979  | 516  | 34  | 103.82 | 8.69  | 0.06 |
| chr14 | 21871007  | 21872299  | 1293 | 772  | 67  | 76.94  | 3.64  | 0.12 |
| chr14 | 22319154  | 22320795  | 1642 | 949  | 93  | 392.22 | 12.64 | 0    |
| chr14 | 22525441  | 22526756  | 1316 | 815  | 51  | 126.42 | 6.39  | 0.07 |
| chr14 | 22649896  | 22651341  | 1446 | 697  | 80  | 130.27 | 5.78  | 0.08 |
| chr14 | 22838285  | 22840137  | 1853 | 804  | 87  | 190.95 | 8     | 0    |
| chr14 | 25598107  | 25599209  | 1103 | 622  | 42  | 136.93 | 7.55  | 0.08 |
| chr14 | 26197643  | 26199065  | 1423 | 981  | 64  | 116.26 | 5.09  | 0.07 |
| chr14 | 26278200  | 26281991  | 3792 | 489  | 212 | 766.65 | 10.73 | 0    |
| chr14 | 26300225  | 26301289  | 1065 | 491  | 41  | 70.04  | 3.88  | 0.16 |
| chr14 | 27398497  | 27400249  | 1753 | 863  | 110 | 369.56 | 11.4  | 0    |
| chr14 | 27456859  | 27458928  | 2070 | 734  | 125 | 270.48 | 6.79  | 0    |
| chr14 | 27488362  | 27489854  | 1493 | 1030 | 61  | 168.26 | 6.26  | 0.06 |
| chr14 | 27783315  | 27784191  | 877  | 545  | 40  | 130.88 | 9.44  | 0.08 |
| chr14 | 28241578  | 28243134  | 1557 | 502  | 95  | 362.18 | 11.76 | 0    |
| chr14 | 30780844  | 30782352  | 1509 | 935  | 64  | 77.56  | 4.05  | 0.12 |
| chr14 | 30791040  | 30792259  | 1220 | 662  | 55  | 121.23 | 6.41  | 0.07 |
| chr14 | 31292296  | 31293283  | 988  | 405  | 42  | 83.3   | 6.8   | 0.06 |
| chr14 | 31361969  | 31363573  | 1605 | 414  | 66  | 171.67 | 9.37  | 0.06 |
| chr14 | 31437336  | 31440287  | 2952 | 989  | 135 | 326.43 | 9.15  | 0    |
| chr14 | 31467039  | 31468075  | 1037 | 584  | 59  | 143.28 | 10.69 | 0.09 |
| chr14 | 31529282  | 31530401  | 1120 | 834  | 41  | 79.04  | 4.78  | 0.1  |

|       |          |          |      |      |     |        |       |      |
|-------|----------|----------|------|------|-----|--------|-------|------|
| chr14 | 31814075 | 31815433 | 1359 | 901  | 59  | 132.77 | 6.99  | 0.08 |
| chr14 | 31831800 | 31833150 | 1351 | 514  | 63  | 114.62 | 5.78  | 0.06 |
| chr14 | 31941570 | 31942711 | 1142 | 538  | 60  | 107.37 | 6.83  | 0.06 |
| chr14 | 31977703 | 31982063 | 4361 | 1915 | 270 | 535.08 | 7.36  | 0    |
| chr14 | 32018926 | 32020219 | 1294 | 891  | 44  | 75.83  | 5.94  | 0.14 |
| chr14 | 32063841 | 32065158 | 1318 | 817  | 90  | 186.91 | 8.54  | 0    |
| chr14 | 32149333 | 32150573 | 1241 | 587  | 68  | 154.99 | 7.51  | 0.1  |
| chr14 | 32248688 | 32249705 | 1018 | 667  | 65  | 188    | 9.29  | 0    |
| chr14 | 32307705 | 32308811 | 1107 | 492  | 48  | 114.66 | 6.99  | 0.06 |
| chr14 | 32898085 | 32899501 | 1417 | 728  | 64  | 110.47 | 4.91  | 0.06 |
| chr14 | 32972768 | 32974160 | 1393 | 396  | 58  | 94.15  | 4.2   | 0.07 |
| chr14 | 32978781 | 32979861 | 1081 | 436  | 38  | 92.55  | 5.39  | 0.07 |
| chr14 | 35123181 | 35125240 | 2060 | 398  | 93  | 262.82 | 8.75  | 0    |
| chr14 | 35486521 | 35487644 | 1124 | 632  | 48  | 112.4  | 6.62  | 0.06 |
| chr14 | 41778573 | 41779569 | 997  | 522  | 41  | 112.21 | 9.79  | 0.06 |
| chr14 | 45669157 | 45670613 | 1457 | 1058 | 61  | 105.62 | 6.22  | 0.06 |
| chr14 | 45937677 | 45938880 | 1204 | 449  | 47  | 97.55  | 6.25  | 0.08 |
| chr14 | 46277459 | 46278654 | 1196 | 652  | 67  | 124.68 | 6.86  | 0.07 |
| chr14 | 47896189 | 47897406 | 1218 | 553  | 58  | 144.51 | 7.39  | 0.09 |
| chr14 | 47992606 | 47997486 | 4881 | 1386 | 327 | 896.17 | 9.54  | 0    |
| chr14 | 47998399 | 48000757 | 2359 | 1530 | 87  | 204.51 | 5.69  | 0    |
| chr14 | 48002167 | 48003904 | 1738 | 1229 | 79  | 160.25 | 5.5   | 0.11 |
| chr14 | 48005414 | 48007809 | 2396 | 650  | 137 | 565.02 | 11.43 | 0    |
| chr14 | 48008393 | 48009506 | 1114 | 920  | 36  | 103.95 | 7.12  | 0.06 |
| chr14 | 48091984 | 48092733 | 750  | 273  | 27  | 88.13  | 7.51  | 0.07 |
| chr14 | 49065517 | 49066504 | 988  | 363  | 50  | 129.49 | 7.42  | 0.08 |
| chr14 | 49685569 | 49686720 | 1152 | 550  | 55  | 138.24 | 7.74  | 0.09 |
| chr14 | 49791250 | 49792069 | 820  | 416  | 36  | 85.82  | 6.33  | 0.07 |
| chr14 | 51427032 | 51428145 | 1114 | 605  | 57  | 155.37 | 11.26 | 0.11 |
| chr14 | 51549224 | 51551367 | 2144 | 980  | 121 | 187.2  | 5.17  | 0    |
| chr14 | 51682253 | 51685420 | 3168 | 2680 | 183 | 420.41 | 9.54  | 0    |
| chr14 | 51708634 | 51710845 | 2212 | 1708 | 115 | 309.12 | 8.44  | 0    |
| chr14 | 52638820 | 52640464 | 1645 | 799  | 102 | 328.95 | 9.46  | 0    |
| chr14 | 52723396 | 52724608 | 1213 | 666  | 65  | 130.97 | 5.12  | 0.08 |
| chr14 | 52816575 | 52818230 | 1656 | 267  | 62  | 154.36 | 5.84  | 0.1  |
| chr14 | 52876694 | 52878011 | 1318 | 712  | 64  | 153.33 | 7.08  | 0.1  |
| chr14 | 52898674 | 52899671 | 998  | 532  | 40  | 121.11 | 7.61  | 0.07 |
| chr14 | 52924090 | 52925332 | 1243 | 759  | 60  | 178.79 | 7.28  | 0    |
| chr14 | 55027905 | 55029318 | 1414 | 442  | 48  | 76.74  | 5.39  | 0.12 |
| chr14 | 55135642 | 55137071 | 1430 | 898  | 87  | 232.6  | 10.49 | 0    |
| chr14 | 55172905 | 55173851 | 947  | 529  | 48  | 118.91 | 5.83  | 0.07 |
| chr14 | 55304579 | 55306315 | 1737 | 1163 | 107 | 328.07 | 8.43  | 0    |
| chr14 | 55495065 | 55496143 | 1079 | 438  | 52  | 148.33 | 6.93  | 0.1  |
| chr14 | 55501698 | 55502949 | 1252 | 389  | 61  | 173.56 | 9.63  | 0.07 |

|       |          |          |      |      |     |        |       |      |
|-------|----------|----------|------|------|-----|--------|-------|------|
| chr14 | 55512110 | 55513785 | 1676 | 753  | 86  | 215.7  | 8.76  | 0    |
| chr14 | 55633037 | 55634862 | 1826 | 896  | 100 | 135.04 | 4.68  | 0.08 |
| chr14 | 55713352 | 55714378 | 1027 | 548  | 48  | 157.09 | 10.73 | 0.11 |
| chr14 | 56097409 | 56098361 | 953  | 382  | 40  | 155.61 | 11.07 | 0.11 |
| chr14 | 56178286 | 56180032 | 1747 | 702  | 116 | 198.23 | 5.26  | 0    |
| chr14 | 56196825 | 56197791 | 967  | 435  | 35  | 83.59  | 6.81  | 0.06 |
| chr14 | 56209380 | 56210961 | 1582 | 569  | 75  | 153.5  | 6.22  | 0.1  |
| chr14 | 56222047 | 56223788 | 1742 | 1177 | 88  | 114.45 | 4.27  | 0.06 |
| chr14 | 56261564 | 56262831 | 1268 | 639  | 81  | 299.9  | 10.4  | 0    |
| chr14 | 56290527 | 56291524 | 998  | 502  | 44  | 76.99  | 6.36  | 0.12 |
| chr14 | 56299922 | 56301254 | 1333 | 803  | 79  | 236.38 | 13.48 | 0    |
| chr14 | 56503304 | 56504272 | 969  | 547  | 36  | 95.36  | 7.68  | 0.07 |
| chr14 | 57194005 | 57194945 | 941  | 516  | 41  | 100.58 | 9.19  | 0.08 |
| chr14 | 57286364 | 57287804 | 1441 | 511  | 70  | 134.03 | 5.78  | 0.08 |
| chr14 | 57395958 | 57397837 | 1880 | 1209 | 87  | 169.58 | 4.98  | 0.06 |
| chr14 | 57505800 | 57507200 | 1401 | 406  | 49  | 159.42 | 8.24  | 0.11 |
| chr14 | 58016936 | 58017856 | 921  | 547  | 37  | 88.09  | 7.32  | 0.07 |
| chr14 | 58189965 | 58190904 | 940  | 399  | 45  | 110.05 | 6.74  | 0.06 |
| chr14 | 58283259 | 58284257 | 999  | 484  | 38  | 73.5   | 7.04  | 0.13 |
| chr14 | 58364150 | 58365583 | 1434 | 960  | 51  | 121.34 | 6.29  | 0.07 |
| chr14 | 58416362 | 58417364 | 1003 | 407  | 41  | 72.41  | 4.98  | 0.15 |
| chr14 | 58444687 | 58445538 | 852  | 451  | 32  | 76.13  | 6.07  | 0.12 |
| chr14 | 60059352 | 60060383 | 1032 | 494  | 41  | 149.92 | 13.29 | 0.1  |
| chr14 | 60216267 | 60217402 | 1136 | 533  | 75  | 213.78 | 13.58 | 0    |
| chr14 | 61791224 | 61792628 | 1405 | 417  | 48  | 85     | 5.68  | 0.07 |
| chr14 | 61928247 | 61929955 | 1709 | 1089 | 83  | 228.79 | 8.07  | 0    |
| chr14 | 62058307 | 62059288 | 982  | 571  | 39  | 109.88 | 7.19  | 0.06 |
| chr14 | 62175002 | 62176287 | 1286 | 833  | 70  | 201.43 | 9.5   | 0    |
| chr14 | 62299472 | 62302888 | 3417 | 2140 | 223 | 796.79 | 12.12 | 0    |
| chr14 | 62589821 | 62591214 | 1394 | 216  | 62  | 82.84  | 4.8   | 0.11 |
| chr14 | 62950687 | 62951770 | 1084 | 619  | 54  | 177.58 | 9.37  | 0.07 |
| chr14 | 63378356 | 63381397 | 3042 | 1742 | 173 | 498.22 | 9.15  | 0    |
| chr14 | 63455856 | 63458244 | 2389 | 763  | 114 | 71.47  | 2.99  | 0.15 |
| chr14 | 63721649 | 63723024 | 1376 | 967  | 57  | 106.26 | 4.72  | 0.06 |
| chr14 | 63740816 | 63744224 | 3409 | 1883 | 224 | 576.45 | 8.37  | 0    |
| chr14 | 63744395 | 63745604 | 1210 | 684  | 50  | 81.37  | 4.78  | 0.1  |
| chr14 | 63746020 | 63751903 | 5884 | 1199 | 306 | 454.61 | 5.15  | 0    |
| chr14 | 63762642 | 63765541 | 2900 | 2497 | 146 | 286.37 | 6.18  | 0    |
| chr14 | 64162025 | 64162983 | 959  | 465  | 39  | 112.92 | 7.19  | 0.06 |
| chr14 | 65058804 | 65060290 | 1487 | 561  | 68  | 142.1  | 5.53  | 0.09 |
| chr14 | 65568111 | 65569198 | 1088 | 555  | 47  | 88.53  | 5.6   | 0.07 |
| chr14 | 65716418 | 65717326 | 909  | 464  | 29  | 78.07  | 10.37 | 0.12 |
| chr14 | 65961920 | 65963541 | 1622 | 575  | 84  | 202.72 | 6.47  | 0    |
| chr14 | 65977256 | 65978181 | 926  | 520  | 33  | 77.97  | 5.96  | 0.12 |

|       |           |           |      |      |     |        |       |      |
|-------|-----------|-----------|------|------|-----|--------|-------|------|
| chr14 | 66899108  | 66900278  | 1171 | 667  | 48  | 113.22 | 6.93  | 0.06 |
| chr14 | 67487232  | 67488596  | 1365 | 360  | 64  | 146.4  | 6.41  | 0.09 |
| chr14 | 67627457  | 67628333  | 877  | 424  | 38  | 105.16 | 6.47  | 0.06 |
| chr14 | 68333096  | 68334582  | 1487 | 991  | 68  | 74.75  | 3.6   | 0.13 |
| chr14 | 70131800  | 70133690  | 1891 | 503  | 74  | 127.86 | 5.73  | 0.08 |
| chr14 | 70205242  | 70205940  | 699  | 464  | 25  | 73.43  | 6.82  | 0.13 |
| chr14 | 70456237  | 70457432  | 1196 | 692  | 53  | 72.06  | 4.05  | 0.15 |
| chr14 | 70552892  | 70554070  | 1179 | 444  | 48  | 99     | 5.28  | 0.08 |
| chr14 | 70842592  | 70843743  | 1152 | 526  | 49  | 70.49  | 4.85  | 0.16 |
| chr14 | 70976987  | 70978017  | 1031 | 480  | 43  | 73.23  | 5.09  | 0.13 |
| chr14 | 71166787  | 71167823  | 1037 | 581  | 38  | 85.07  | 5.66  | 0.07 |
| chr14 | 73109332  | 73110694  | 1363 | 396  | 72  | 259.41 | 8.54  | 0    |
| chr14 | 73537720  | 73539045  | 1326 | 837  | 57  | 97.75  | 5.09  | 0.08 |
| chr14 | 73542625  | 73543766  | 1142 | 727  | 48  | 122.85 | 7.61  | 0.07 |
| chr14 | 73571760  | 73573202  | 1443 | 947  | 94  | 298.23 | 10.34 | 0    |
| chr14 | 73637292  | 73641832  | 4541 | 557  | 225 | 292.64 | 5.95  | 0    |
| chr14 | 73754922  | 73755838  | 917  | 439  | 36  | 94.84  | 6.81  | 0.07 |
| chr14 | 73781256  | 73783233  | 1978 | 1517 | 81  | 144.06 | 6.15  | 0.09 |
| chr14 | 73783584  | 73785427  | 1844 | 1372 | 115 | 285.19 | 8.09  | 0    |
| chr14 | 73841456  | 73842438  | 983  | 488  | 42  | 74.64  | 6.89  | 0.13 |
| chr14 | 73924271  | 73925458  | 1188 | 443  | 51  | 83.51  | 5.78  | 0.06 |
| chr14 | 75131695  | 75132730  | 1036 | 317  | 49  | 99.28  | 5.69  | 0.08 |
| chr14 | 75577246  | 75581334  | 4089 | 1811 | 191 | 266.77 | 5.06  | 0    |
| chr14 | 75683515  | 75684662  | 1148 | 580  | 59  | 107.42 | 6.79  | 0.06 |
| chr14 | 76153652  | 76154631  | 980  | 508  | 39  | 80.26  | 5.28  | 0.1  |
| chr14 | 76186231  | 76187363  | 1133 | 572  | 58  | 175.28 | 8.86  | 0.07 |
| chr14 | 76228553  | 76229868  | 1316 | 828  | 50  | 92.53  | 4.92  | 0.07 |
| chr14 | 76233603  | 76234440  | 838  | 425  | 35  | 73.94  | 6.74  | 0.13 |
| chr14 | 76234485  | 76235467  | 983  | 480  | 40  | 70.44  | 4.36  | 0.16 |
| chr14 | 76244125  | 76246016  | 1892 | 577  | 119 | 261.48 | 6.83  | 0    |
| chr14 | 76510184  | 76511356  | 1173 | 424  | 60  | 83.94  | 4.72  | 0.06 |
| chr14 | 76813717  | 76815002  | 1286 | 750  | 69  | 216.4  | 9.63  | 0    |
| chr14 | 79132246  | 79133154  | 909  | 518  | 38  | 148.08 | 11.65 | 0.1  |
| chr14 | 79789992  | 79790984  | 993  | 633  | 60  | 260.35 | 14.75 | 0    |
| chr14 | 79880382  | 79883173  | 2792 | 596  | 155 | 441.95 | 10.9  | 0    |
| chr14 | 79986519  | 79987854  | 1336 | 527  | 70  | 202.89 | 8.09  | 0    |
| chr14 | 102038836 | 102039770 | 935  | 457  | 35  | 93.31  | 7.19  | 0.07 |
| chr14 | 103380202 | 103382751 | 2550 | 2015 | 130 | 351.95 | 8.11  | 0    |
| chr14 | 103468983 | 103470286 | 1304 | 640  | 66  | 184.69 | 7.72  | 0    |
| chr14 | 103497682 | 103499523 | 1842 | 1031 | 100 | 294.6  | 10.3  | 0    |
| chr14 | 105575770 | 105576914 | 1145 | 802  | 48  | 140.41 | 7.19  | 0.09 |
| chr14 | 118488247 | 118489382 | 1136 | 388  | 48  | 117.76 | 6.55  | 0.07 |
| chr14 | 118531466 | 118532583 | 1118 | 561  | 45  | 81.27  | 6.47  | 0.1  |
| chr14 | 120675135 | 120676145 | 1011 | 560  | 40  | 94.03  | 6.25  | 0.07 |

|       |           |           |      |      |     |        |       |      |
|-------|-----------|-----------|------|------|-----|--------|-------|------|
| chr14 | 120876115 | 120877885 | 1771 | 1093 | 99  | 168.65 | 5.95  | 0.06 |
| chr14 | 121161613 | 121162489 | 877  | 362  | 38  | 74.34  | 4.05  | 0.13 |
| chr14 | 121309560 | 121310663 | 1104 | 552  | 43  | 84.46  | 5.98  | 0.06 |
| chr14 | 121777075 | 121779517 | 2443 | 1697 | 113 | 316.04 | 6.22  | 0    |
| chr14 | 122277039 | 122278252 | 1214 | 732  | 51  | 96.62  | 5.5   | 0.08 |
| chr14 | 122503854 | 122504790 | 937  | 438  | 35  | 99.59  | 11.9  | 0.08 |
| chr15 | 3220184   | 3221543   | 1360 | 809  | 68  | 208.52 | 10.92 | 0    |
| chr15 | 3231556   | 3232532   | 977  | 486  | 34  | 83.15  | 6.74  | 0.11 |
| chr15 | 3928777   | 3930469   | 1693 | 629  | 73  | 137.94 | 6.8   | 0.09 |
| chr15 | 3945013   | 3946470   | 1458 | 682  | 86  | 211.7  | 8.96  | 0    |
| chr15 | 3975973   | 3977941   | 1969 | 1501 | 88  | 247.36 | 8.09  | 0    |
| chr15 | 5065912   | 5067123   | 1212 | 399  | 58  | 71.81  | 4.05  | 0.15 |
| chr15 | 5093498   | 5094399   | 902  | 464  | 32  | 75.56  | 6.81  | 0.13 |
| chr15 | 6335829   | 6337109   | 1281 | 1002 | 49  | 128.4  | 8.09  | 0.08 |
| chr15 | 6518690   | 6521532   | 2843 | 2352 | 110 | 72.15  | 3.08  | 0.15 |
| chr15 | 8118531   | 8119624   | 1094 | 477  | 52  | 172.86 | 10.79 | 0.07 |
| chr15 | 8393434   | 8394630   | 1197 | 563  | 64  | 293.52 | 15.6  | 0    |
| chr15 | 11924935  | 11926152  | 1218 | 777  | 47  | 78.8   | 6.15  | 0.12 |
| chr15 | 12046736  | 12048012  | 1277 | 726  | 67  | 281.48 | 11.18 | 0    |
| chr15 | 12134179  | 12135390  | 1212 | 673  | 64  | 103.79 | 5.71  | 0.06 |
| chr15 | 12250773  | 12252359  | 1587 | 650  | 65  | 235.12 | 8.09  | 0    |
| chr15 | 25343046  | 25343800  | 755  | 404  | 24  | 75.27  | 8.09  | 0.13 |
| chr15 | 27610703  | 27611898  | 1196 | 658  | 63  | 130.49 | 6.14  | 0.08 |
| chr15 | 27955423  | 27956229  | 807  | 392  | 38  | 98.22  | 6.33  | 0.08 |
| chr15 | 31296652  | 31297646  | 995  | 646  | 42  | 125.68 | 8.54  | 0.07 |
| chr15 | 31530977  | 31532350  | 1374 | 958  | 63  | 125.01 | 5.91  | 0.07 |
| chr15 | 33012358  | 33013410  | 1053 | 763  | 42  | 80.51  | 5.06  | 0.1  |
| chr15 | 34011966  | 34013126  | 1161 | 669  | 64  | 147.92 | 7.51  | 0.1  |
| chr15 | 34372358  | 34373953  | 1596 | 755  | 80  | 218.03 | 6.99  | 0    |
| chr15 | 35300599  | 35301889  | 1291 | 628  | 58  | 89.56  | 4.85  | 0.07 |
| chr15 | 35867499  | 35868443  | 945  | 456  | 41  | 79.37  | 7.16  | 0.1  |
| chr15 | 36103287  | 36104199  | 913  | 395  | 42  | 93.17  | 6.15  | 0.07 |
| chr15 | 36537668  | 36539734  | 2067 | 1038 | 114 | 239.85 | 8.93  | 0    |
| chr15 | 36721906  | 36724381  | 2476 | 772  | 111 | 158.79 | 5.39  | 0.11 |
| chr15 | 36936835  | 36937910  | 1076 | 528  | 47  | 101.11 | 7.42  | 0.08 |
| chr15 | 37889846  | 37891351  | 1506 | 782  | 83  | 133.78 | 7.17  | 0.08 |
| chr15 | 38228436  | 38232417  | 3982 | 2025 | 206 | 261.9  | 7.19  | 0    |
| chr15 | 38397774  | 38398658  | 885  | 401  | 33  | 77.36  | 5.26  | 0.12 |
| chr15 | 38399854  | 38401573  | 1720 | 660  | 91  | 174.28 | 6.47  | 0.07 |
| chr15 | 38402423  | 38404009  | 1587 | 927  | 72  | 159.34 | 6.51  | 0.11 |
| chr15 | 38448523  | 38449756  | 1234 | 720  | 70  | 144.95 | 5.74  | 0.09 |
| chr15 | 38943636  | 38944982  | 1347 | 836  | 55  | 81.69  | 6.07  | 0.1  |
| chr15 | 39774540  | 39776346  | 1807 | 1043 | 68  | 267.36 | 11.07 | 0    |
| chr15 | 41278545  | 41279363  | 819  | 403  | 27  | 84.35  | 7.36  | 0.06 |

|       |          |          |      |      |     |        |       |      |
|-------|----------|----------|------|------|-----|--------|-------|------|
| chr15 | 44450307 | 44451628 | 1322 | 830  | 63  | 155.85 | 6.68  | 0.11 |
| chr15 | 50481002 | 50481899 | 898  | 397  | 30  | 94.95  | 7.46  | 0.07 |
| chr15 | 50719805 | 50721881 | 2077 | 1075 | 88  | 293.43 | 9.98  | 0    |
| chr15 | 54943557 | 54944507 | 951  | 407  | 35  | 91.41  | 8.54  | 0.07 |
| chr15 | 57752673 | 57753682 | 1010 | 485  | 44  | 135.61 | 8.99  | 0.08 |
| chr15 | 57807187 | 57808284 | 1098 | 418  | 66  | 136.58 | 9.07  | 0.08 |
| chr15 | 57865252 | 57866264 | 1013 | 573  | 38  | 87.79  | 6.07  | 0.07 |
| chr15 | 57907286 | 57908660 | 1375 | 439  | 72  | 187.75 | 7.08  | 0    |
| chr15 | 57966082 | 57967308 | 1227 | 692  | 63  | 179.96 | 7.72  | 0    |
| chr15 | 57972534 | 57973591 | 1058 | 382  | 40  | 76.01  | 5.28  | 0.14 |
| chr15 | 58719928 | 58721551 | 1624 | 665  | 77  | 133.07 | 5.02  | 0.08 |
| chr15 | 58764675 | 58765822 | 1148 | 709  | 62  | 212.1  | 10.73 | 0    |
| chr15 | 58912385 | 58914050 | 1666 | 1135 | 86  | 206.31 | 8.09  | 0    |
| chr15 | 59205228 | 59206320 | 1093 | 512  | 63  | 141.13 | 7.01  | 0.09 |
| chr15 | 59479478 | 59480856 | 1379 | 797  | 68  | 184.06 | 8.09  | 0    |
| chr15 | 63890364 | 63891595 | 1232 | 760  | 62  | 148.01 | 6.15  | 0.1  |
| chr15 | 67008049 | 67009919 | 1871 | 556  | 89  | 170.51 | 5.39  | 0.06 |
| chr15 | 68089087 | 68091552 | 2466 | 918  | 111 | 117.57 | 4.62  | 0.07 |
| chr15 | 72920585 | 72921854 | 1270 | 785  | 78  | 194.74 | 6.14  | 0    |
| chr15 | 73475651 | 73476596 | 946  | 502  | 33  | 70.66  | 9.71  | 0.16 |
| chr15 | 74539305 | 74540203 | 899  | 492  | 32  | 74.85  | 6.32  | 0.13 |
| chr15 | 75671845 | 75672989 | 1145 | 503  | 71  | 197.1  | 8.69  | 0    |
| chr15 | 75687021 | 75688446 | 1426 | 484  | 71  | 126.75 | 4.58  | 0.07 |
| chr15 | 75770907 | 75771983 | 1077 | 550  | 50  | 109.73 | 7.44  | 0.06 |
| chr15 | 75899621 | 75900714 | 1094 | 508  | 45  | 107.5  | 7.32  | 0.06 |
| chr15 | 75910263 | 75911995 | 1733 | 1023 | 96  | 72.13  | 4.21  | 0.15 |
| chr15 | 76028002 | 76029515 | 1514 | 459  | 67  | 106.73 | 4.51  | 0.06 |
| chr15 | 76173580 | 76174508 | 929  | 359  | 36  | 116.84 | 7.78  | 0.07 |
| chr15 | 76180750 | 76182617 | 1868 | 997  | 97  | 146.07 | 5.71  | 0.09 |
| chr15 | 76210236 | 76211631 | 1396 | 733  | 70  | 97.35  | 5.09  | 0.08 |
| chr15 | 76307446 | 76308487 | 1042 | 466  | 50  | 92.76  | 5.86  | 0.07 |
| chr15 | 76341658 | 76343180 | 1523 | 710  | 96  | 169.08 | 5.47  | 0.06 |
| chr15 | 76406263 | 76407401 | 1139 | 607  | 68  | 207.38 | 9.1   | 0    |
| chr15 | 76437420 | 76438505 | 1086 | 544  | 51  | 133.78 | 10.3  | 0.08 |
| chr15 | 76455946 | 76457583 | 1638 | 612  | 67  | 125.44 | 6.07  | 0.07 |
| chr15 | 76501893 | 76502643 | 751  | 264  | 34  | 80.54  | 5.73  | 0.1  |
| chr15 | 76545355 | 76546748 | 1394 | 458  | 83  | 198.18 | 9.21  | 0    |
| chr15 | 76553668 | 76555491 | 1824 | 607  | 82  | 133.54 | 6.47  | 0.08 |
| chr15 | 76717187 | 76717763 | 577  | 369  | 20  | 71.59  | 8.74  | 0.15 |
| chr15 | 76729776 | 76730895 | 1120 | 629  | 48  | 100.25 | 6.74  | 0.08 |
| chr15 | 76755592 | 76756476 | 885  | 445  | 40  | 97.49  | 7.04  | 0.08 |
| chr15 | 76778543 | 76779564 | 1022 | 450  | 41  | 108.93 | 7.24  | 0.06 |
| chr15 | 77670834 | 77673375 | 2542 | 1014 | 117 | 243.05 | 5.31  | 0    |
| chr15 | 78004273 | 78005376 | 1104 | 550  | 57  | 116    | 7.53  | 0.07 |

|       |          |          |      |      |     |        |       |      |
|-------|----------|----------|------|------|-----|--------|-------|------|
| chr15 | 78074754 | 78076151 | 1398 | 476  | 79  | 176.65 | 7.53  | 0.07 |
| chr15 | 78155865 | 78156708 | 844  | 297  | 34  | 112.74 | 7.59  | 0.06 |
| chr15 | 78236559 | 78237457 | 899  | 343  | 36  | 103.5  | 7.19  | 0.06 |
| chr15 | 78427206 | 78430229 | 3024 | 1058 | 172 | 379.85 | 9.21  | 0    |
| chr15 | 78706833 | 78708617 | 1785 | 1036 | 117 | 393.51 | 10.07 | 0    |
| chr15 | 78729765 | 78731152 | 1388 | 457  | 58  | 137.31 | 7.32  | 0.08 |
| chr15 | 78756706 | 78758815 | 2110 | 383  | 99  | 230.11 | 7.36  | 0    |
| chr15 | 78858046 | 78859513 | 1468 | 799  | 69  | 208.92 | 8.52  | 0    |
| chr15 | 78892762 | 78893952 | 1191 | 706  | 51  | 99.44  | 5.83  | 0.08 |
| chr15 | 78938616 | 78940096 | 1481 | 425  | 58  | 177.29 | 6.83  | 0.07 |
| chr15 | 79059228 | 79060309 | 1082 | 511  | 47  | 100.33 | 6.07  | 0.08 |
| chr15 | 79158068 | 79159679 | 1612 | 659  | 72  | 100.82 | 4.7   | 0.08 |
| chr15 | 79187683 | 79188722 | 1040 | 463  | 46  | 90.06  | 5.6   | 0.07 |
| chr15 | 79375981 | 79378295 | 2315 | 1464 | 123 | 117.67 | 4.52  | 0.07 |
| chr15 | 79501043 | 79501661 | 619  | 199  | 23  | 82.93  | 7.87  | 0.11 |
| chr15 | 79571678 | 79573095 | 1418 | 783  | 62  | 108.11 | 5.39  | 0.06 |
| chr15 | 79722413 | 79723182 | 770  | 344  | 29  | 93.49  | 6.18  | 0.07 |
| chr15 | 79844054 | 79845860 | 1807 | 1301 | 101 | 376.91 | 17.98 | 0    |
| chr15 | 79901719 | 79903236 | 1518 | 971  | 71  | 160.28 | 7.75  | 0.11 |
| chr15 | 79911222 | 79914605 | 3384 | 2610 | 180 | 282.7  | 9.52  | 0    |
| chr15 | 79963145 | 79964970 | 1826 | 634  | 94  | 270.62 | 6.82  | 0    |
| chr15 | 80063872 | 80064977 | 1106 | 590  | 54  | 78.25  | 5.47  | 0.12 |
| chr15 | 80085152 | 80087075 | 1924 | 855  | 163 | 377.1  | 9.27  | 0    |
| chr15 | 80088024 | 80089479 | 1456 | 526  | 59  | 110.5  | 5.39  | 0.06 |
| chr15 | 80540901 | 80542322 | 1422 | 671  | 73  | 85.57  | 4.56  | 0.07 |
| chr15 | 80778475 | 80779339 | 865  | 289  | 37  | 75.57  | 6.15  | 0.13 |
| chr15 | 81229694 | 81231056 | 1363 | 845  | 74  | 191.44 | 8.09  | 0    |
| chr15 | 81295958 | 81297088 | 1131 | 619  | 53  | 163.59 | 8.52  | 0.06 |
| chr15 | 81352363 | 81354282 | 1920 | 1304 | 144 | 556.32 | 12.36 | 0    |
| chr15 | 81354308 | 81355168 | 861  | 413  | 28  | 75.85  | 6.62  | 0.14 |
| chr15 | 81415143 | 81417438 | 2296 | 892  | 161 | 823.2  | 16.5  | 0    |
| chr15 | 81524043 | 81525103 | 1061 | 562  | 41  | 70.47  | 6.47  | 0.16 |
| chr15 | 81640403 | 81642445 | 2043 | 887  | 131 | 373.31 | 9.8   | 0    |
| chr15 | 81666155 | 81667524 | 1370 | 894  | 54  | 111.62 | 6.99  | 0.06 |
| chr15 | 81687976 | 81690869 | 2894 | 686  | 165 | 323.8  | 9.4   | 0    |
| chr15 | 81701888 | 81703423 | 1536 | 948  | 92  | 147.05 | 7.45  | 0.09 |
| chr15 | 81877199 | 81878188 | 990  | 479  | 38  | 110.31 | 6.19  | 0.06 |
| chr15 | 82169000 | 82169828 | 829  | 492  | 30  | 70.59  | 6.19  | 0.16 |
| chr15 | 82176102 | 82177558 | 1457 | 506  | 75  | 114.23 | 6.42  | 0.06 |
| chr15 | 82184150 | 82185440 | 1291 | 751  | 76  | 157.35 | 6.57  | 0.11 |
| chr15 | 82863279 | 82864407 | 1129 | 377  | 53  | 84.51  | 5.22  | 0.06 |
| chr15 | 82978663 | 82980470 | 1808 | 1197 | 86  | 165.24 | 5.69  | 0.06 |
| chr15 | 83002094 | 83003225 | 1132 | 622  | 59  | 115.36 | 7.28  | 0.06 |
| chr15 | 83294649 | 83295471 | 823  | 413  | 31  | 74.43  | 6.88  | 0.13 |

|       |          |          |      |      |     |        |       |      |
|-------|----------|----------|------|------|-----|--------|-------|------|
| chr15 | 83393143 | 83394315 | 1173 | 776  | 47  | 83.72  | 4.53  | 0.06 |
| chr15 | 83425121 | 83425950 | 830  | 427  | 32  | 113.83 | 9.55  | 0.06 |
| chr15 | 84022169 | 84023288 | 1120 | 614  | 54  | 105.33 | 6.36  | 0.06 |
| chr15 | 84753003 | 84754317 | 1315 | 838  | 58  | 82.83  | 4.85  | 0.11 |
| chr15 | 84818229 | 84818999 | 771  | 282  | 33  | 81.74  | 6.99  | 0.1  |
| chr15 | 85166440 | 85167447 | 1008 | 419  | 51  | 171.32 | 7.66  | 0.06 |
| chr15 | 85483210 | 85484843 | 1634 | 1087 | 98  | 223.16 | 8.36  | 0    |
| chr15 | 85662413 | 85663096 | 684  | 350  | 30  | 97.82  | 7.64  | 0.08 |
| chr15 | 85689810 | 85690651 | 842  | 550  | 32  | 72.48  | 5.39  | 0.15 |
| chr15 | 85709407 | 85710096 | 690  | 446  | 26  | 73.35  | 6.29  | 0.13 |
| chr15 | 85966054 | 85967015 | 962  | 645  | 38  | 72.97  | 5.06  | 0.15 |
| chr15 | 85998970 | 86000496 | 1527 | 630  | 62  | 91.58  | 4.2   | 0.07 |
| chr15 | 86012158 | 86014579 | 2422 | 1063 | 114 | 199.08 | 5.2   | 0    |
| chr15 | 86014712 | 86017185 | 2474 | 1751 | 144 | 371.25 | 9.02  | 0    |
| chr15 | 86043404 | 86045869 | 2466 | 1368 | 128 | 160.38 | 6.34  | 0.11 |
| chr15 | 88562837 | 88564227 | 1391 | 804  | 59  | 182.63 | 8.57  | 0    |
| chr15 | 88564459 | 88565371 | 913  | 436  | 34  | 120.17 | 8.16  | 0.07 |
| chr15 | 88581203 | 88582134 | 932  | 430  | 45  | 123.79 | 7.36  | 0.07 |
| chr15 | 88691967 | 88693345 | 1379 | 940  | 70  | 176.69 | 6.42  | 0.07 |
| chr15 | 88693518 | 88694836 | 1319 | 926  | 48  | 72.61  | 5.18  | 0.15 |
| chr15 | 88905226 | 88906706 | 1481 | 1044 | 62  | 145.23 | 6.9   | 0.09 |
| chr15 | 88953096 | 88953971 | 876  | 515  | 54  | 123.43 | 9.35  | 0.07 |
| chr15 | 89003058 | 89004663 | 1606 | 590  | 72  | 161.42 | 5.25  | 0.11 |
| chr15 | 89007386 | 89008807 | 1422 | 891  | 65  | 90.79  | 4.3   | 0.07 |
| chr15 | 89010264 | 89011985 | 1722 | 1279 | 87  | 192.29 | 7.16  | 0    |
| chr15 | 89026124 | 89027452 | 1329 | 895  | 56  | 93.17  | 5.09  | 0.07 |
| chr15 | 89145242 | 89146322 | 1081 | 501  | 56  | 140.18 | 7.44  | 0.09 |
| chr15 | 89185546 | 89186688 | 1143 | 609  | 54  | 186.24 | 10.35 | 0    |
| chr15 | 89259621 | 89260794 | 1174 | 634  | 56  | 91.01  | 6.26  | 0.07 |
| chr15 | 93105314 | 93106526 | 1213 | 449  | 63  | 115.68 | 5.74  | 0.06 |
| chr15 | 93228269 | 93229004 | 736  | 414  | 30  | 84.98  | 8.09  | 0.07 |
| chr15 | 94419633 | 94420809 | 1177 | 634  | 68  | 242.18 | 13.75 | 0    |
| chr15 | 94421686 | 94422468 | 783  | 584  | 29  | 85.8   | 5.81  | 0.07 |
| chr15 | 95620542 | 95621858 | 1317 | 747  | 68  | 135.72 | 5.86  | 0.08 |
| chr15 | 96115143 | 96116390 | 1248 | 752  | 58  | 140.08 | 7.74  | 0.09 |
| chr15 | 96117691 | 96118510 | 820  | 308  | 33  | 100.97 | 6.08  | 0.08 |
| chr15 | 96471454 | 96473920 | 2467 | 1739 | 122 | 225.96 | 7.25  | 0    |
| chr15 | 96528828 | 96531088 | 2261 | 1310 | 102 | 338.23 | 13.84 | 0    |
| chr15 | 96539586 | 96541084 | 1499 | 888  | 71  | 104.58 | 5.31  | 0.06 |
| chr15 | 97614416 | 97615564 | 1149 | 376  | 57  | 182.71 | 10.48 | 0    |
| chr15 | 97794120 | 97795314 | 1195 | 545  | 57  | 142.57 | 6.68  | 0.09 |
| chr15 | 97923215 | 97924330 | 1116 | 589  | 50  | 156.75 | 6.74  | 0.11 |
| chr15 | 97975512 | 97976566 | 1055 | 420  | 48  | 193.35 | 11.95 | 0    |
| chr15 | 98364040 | 98365209 | 1170 | 653  | 62  | 129.74 | 6.97  | 0.08 |

|       |           |           |      |      |     |        |       |      |
|-------|-----------|-----------|------|------|-----|--------|-------|------|
| chr15 | 98397362  | 98398918  | 1557 | 1027 | 104 | 319.67 | 9.34  | 0    |
| chr15 | 98492019  | 98493722  | 1704 | 1352 | 67  | 143.94 | 6.93  | 0.09 |
| chr15 | 98593082  | 98594133  | 1052 | 497  | 50  | 96.44  | 7.22  | 0.08 |
| chr15 | 98661078  | 98662665  | 1588 | 851  | 78  | 256.99 | 10.67 | 0    |
| chr15 | 98701605  | 98703291  | 1687 | 1015 | 92  | 235.51 | 7.77  | 0    |
| chr15 | 98747927  | 98749140  | 1214 | 550  | 60  | 140.34 | 8.09  | 0.09 |
| chr15 | 98783110  | 98784293  | 1184 | 751  | 43  | 95.03  | 6.81  | 0.07 |
| chr15 | 98815032  | 98816663  | 1632 | 1109 | 78  | 201.04 | 7.36  | 0    |
| chr15 | 98822856  | 98824529  | 1674 | 1232 | 68  | 110.56 | 5.91  | 0.06 |
| chr15 | 98859950  | 98861695  | 1746 | 560  | 93  | 146.95 | 5.47  | 0.09 |
| chr15 | 99081931  | 99082832  | 902  | 442  | 39  | 107.28 | 8.5   | 0.06 |
| chr15 | 99162934  | 99164683  | 1750 | 1568 | 64  | 96.73  | 3.83  | 0.08 |
| chr15 | 99222749  | 99224412  | 1664 | 761  | 80  | 100.94 | 5.55  | 0.08 |
| chr15 | 99532094  | 99533136  | 1043 | 478  | 45  | 114.25 | 8.48  | 0.06 |
| chr15 | 99555595  | 99556825  | 1231 | 551  | 62  | 98.02  | 4.9   | 0.08 |
| chr15 | 99601839  | 99603435  | 1597 | 914  | 76  | 260.39 | 8.57  | 0    |
| chr15 | 99802535  | 99803912  | 1378 | 702  | 79  | 164.22 | 6.26  | 0.06 |
| chr15 | 99869660  | 99870528  | 869  | 490  | 34  | 107.19 | 7.94  | 0.06 |
| chr15 | 100057209 | 100059344 | 2136 | 902  | 102 | 183.81 | 7.8   | 0    |
| chr15 | 100325125 | 100326213 | 1089 | 508  | 48  | 110.5  | 8.44  | 0.06 |
| chr15 | 100381975 | 100383064 | 1090 | 383  | 48  | 178.54 | 10.25 | 0    |
| chr15 | 100445004 | 100447226 | 2223 | 1536 | 137 | 224.77 | 6.64  | 0    |
| chr15 | 100909016 | 100909989 | 974  | 468  | 45  | 117.39 | 7.72  | 0.07 |
| chr15 | 100975018 | 100977202 | 2185 | 1016 | 87  | 123.26 | 6.7   | 0.07 |
| chr15 | 101003850 | 101004701 | 852  | 434  | 33  | 99.98  | 9.15  | 0.08 |
| chr15 | 101076524 | 101077362 | 839  | 451  | 33  | 88.28  | 8.09  | 0.07 |
| chr15 | 101114092 | 101115299 | 1208 | 518  | 54  | 70.19  | 3.92  | 0.16 |
| chr15 | 101903619 | 101904995 | 1377 | 581  | 68  | 102.67 | 4.9   | 0.06 |
| chr15 | 102033405 | 102034368 | 964  | 521  | 33  | 79.39  | 8.09  | 0.1  |
| chr15 | 102076340 | 102078737 | 2398 | 520  | 107 | 118.88 | 4.05  | 0.07 |
| chr15 | 102109389 | 102110541 | 1153 | 564  | 74  | 276.71 | 11.56 | 0    |
| chr15 | 102180608 | 102181690 | 1083 | 561  | 45  | 139.84 | 9.52  | 0.09 |
| chr15 | 102229684 | 102230814 | 1131 | 546  | 62  | 190.84 | 8.46  | 0    |
| chr15 | 102235280 | 102237624 | 2345 | 870  | 139 | 82.46  | 3.55  | 0.11 |
| chr15 | 102300398 | 102301945 | 1548 | 429  | 81  | 209.09 | 9.78  | 0    |
| chr15 | 102347964 | 102349733 | 1770 | 928  | 117 | 286.75 | 7.31  | 0    |
| chr15 | 102454979 | 102456491 | 1513 | 529  | 68  | 86.21  | 4.17  | 0.07 |
| chr15 | 103069459 | 103071643 | 2185 | 642  | 100 | 260.51 | 6.68  | 0    |
| chr15 | 103135101 | 103136236 | 1136 | 551  | 50  | 107.85 | 5.73  | 0.06 |
| chr15 | 103196224 | 103197603 | 1380 | 793  | 71  | 229.93 | 9.96  | 0    |
| chr15 | 103283778 | 103285335 | 1558 | 451  | 61  | 90.17  | 5.2   | 0.07 |
| chr16 | 3742734   | 3745429   | 2696 | 1439 | 150 | 164.73 | 5.39  | 0.06 |
| chr16 | 3884011   | 3884966   | 956  | 411  | 35  | 79.29  | 6.88  | 0.1  |
| chr16 | 4213634   | 4214526   | 893  | 421  | 35  | 98.55  | 7.19  | 0.08 |

|       |          |          |      |      |     |        |       |      |
|-------|----------|----------|------|------|-----|--------|-------|------|
| chr16 | 4419848  | 4421206  | 1359 | 875  | 63  | 212.99 | 10.95 | 0    |
| chr16 | 4557853  | 4559251  | 1399 | 822  | 64  | 149.93 | 8.79  | 0.1  |
| chr16 | 4586429  | 4587301  | 873  | 435  | 36  | 83.79  | 6.62  | 0.06 |
| chr16 | 4679227  | 4680186  | 960  | 619  | 40  | 87.92  | 6     | 0.07 |
| chr16 | 4725984  | 4726983  | 1000 | 466  | 56  | 140.34 | 8.99  | 0.09 |
| chr16 | 4879252  | 4881528  | 2277 | 1522 | 144 | 404.48 | 8.61  | 0    |
| chr16 | 4885831  | 4886794  | 964  | 538  | 39  | 87.39  | 5.52  | 0.07 |
| chr16 | 4963736  | 4964945  | 1210 | 689  | 56  | 86.44  | 4.96  | 0.07 |
| chr16 | 5049502  | 5050760  | 1259 | 614  | 70  | 75.75  | 4.6   | 0.13 |
| chr16 | 5255514  | 5256864  | 1351 | 482  | 73  | 268.58 | 10.79 | 0    |
| chr16 | 8637295  | 8638300  | 1006 | 439  | 42  | 81.09  | 5.5   | 0.1  |
| chr16 | 8738757  | 8739656  | 900  | 305  | 45  | 187.9  | 9.64  | 0    |
| chr16 | 8829362  | 8831410  | 2049 | 519  | 100 | 141.7  | 4.41  | 0.09 |
| chr16 | 10992599 | 10993672 | 1074 | 604  | 52  | 176.17 | 12.14 | 0.07 |
| chr16 | 11134005 | 11135438 | 1434 | 801  | 71  | 86.39  | 4.15  | 0.07 |
| chr16 | 11175560 | 11177100 | 1541 | 1043 | 70  | 93.89  | 5.15  | 0.07 |
| chr16 | 11202723 | 11203842 | 1120 | 723  | 47  | 80.34  | 6.22  | 0.1  |
| chr16 | 11253566 | 11255071 | 1506 | 1021 | 71  | 109.69 | 6     | 0.06 |
| chr16 | 11322494 | 11323404 | 911  | 533  | 39  | 139.65 | 9.4   | 0.09 |
| chr16 | 11908739 | 11909941 | 1203 | 474  | 50  | 119.51 | 5.78  | 0.07 |
| chr16 | 13109478 | 13110793 | 1316 | 561  | 60  | 140.84 | 6.33  | 0.09 |
| chr16 | 13256123 | 13257098 | 976  | 523  | 52  | 142.69 | 6.74  | 0.09 |
| chr16 | 13667883 | 13668718 | 836  | 409  | 31  | 72.92  | 8.09  | 0.15 |
| chr16 | 13671596 | 13673185 | 1590 | 883  | 68  | 100.05 | 4.46  | 0.08 |
| chr16 | 13754411 | 13755432 | 1022 | 381  | 45  | 104.31 | 6.68  | 0.06 |
| chr16 | 13780244 | 13781393 | 1150 | 572  | 59  | 145.11 | 9.71  | 0.09 |
| chr16 | 13818491 | 13820223 | 1733 | 991  | 75  | 133.74 | 4.98  | 0.08 |
| chr16 | 14158741 | 14160301 | 1561 | 988  | 98  | 353.16 | 11.17 | 0    |
| chr16 | 14361022 | 14362047 | 1026 | 665  | 42  | 107.07 | 6.47  | 0.06 |
| chr16 | 15594095 | 15595081 | 987  | 466  | 43  | 98.88  | 7.39  | 0.08 |
| chr16 | 15637209 | 15638460 | 1252 | 849  | 63  | 110.06 | 6.26  | 0.06 |
| chr16 | 15862619 | 15864033 | 1415 | 804  | 66  | 100.99 | 5.74  | 0.08 |
| chr16 | 15886325 | 15888507 | 2183 | 1098 | 125 | 197.81 | 6.74  | 0    |
| chr16 | 16302324 | 16303440 | 1117 | 648  | 58  | 118.77 | 6.7   | 0.07 |
| chr16 | 16358402 | 16359291 | 890  | 323  | 37  | 81.65  | 5.28  | 0.1  |
| chr16 | 16526413 | 16527943 | 1531 | 406  | 56  | 133.96 | 7.08  | 0.08 |
| chr16 | 16982866 | 16983993 | 1128 | 566  | 63  | 112.17 | 6.42  | 0.06 |
| chr16 | 17200961 | 17201963 | 1003 | 558  | 38  | 132.8  | 10.33 | 0.08 |
| chr16 | 17233139 | 17234187 | 1049 | 571  | 52  | 137.72 | 9.15  | 0.09 |
| chr16 | 17405365 | 17406772 | 1408 | 673  | 77  | 149.75 | 6     | 0.1  |
| chr16 | 17530401 | 17531737 | 1337 | 871  | 60  | 77.26  | 4.17  | 0.12 |
| chr16 | 17722479 | 17723471 | 993  | 517  | 43  | 124.25 | 11.5  | 0.07 |
| chr16 | 17759263 | 17760116 | 854  | 418  | 36  | 86.25  | 8.09  | 0.07 |
| chr16 | 17891253 | 17892305 | 1053 | 502  | 41  | 137.17 | 8.09  | 0.08 |

|       |          |          |      |      |     |        |       |      |
|-------|----------|----------|------|------|-----|--------|-------|------|
| chr16 | 17921534 | 17922719 | 1186 | 600  | 90  | 220.99 | 11.69 | 0    |
| chr16 | 18065916 | 18066879 | 964  | 474  | 34  | 78.85  | 7.24  | 0.12 |
| chr16 | 18248360 | 18250303 | 1944 | 640  | 120 | 206.24 | 6.78  | 0    |
| chr16 | 18811431 | 18812949 | 1519 | 1021 | 64  | 92.4   | 5.86  | 0.07 |
| chr16 | 18876229 | 18877628 | 1400 | 412  | 81  | 240.33 | 7.55  | 0    |
| chr16 | 20097249 | 20098624 | 1376 | 535  | 74  | 180.05 | 6.85  | 0    |
| chr16 | 20140987 | 20141734 | 748  | 326  | 28  | 76.92  | 7.61  | 0.12 |
| chr16 | 20301585 | 20302801 | 1217 | 447  | 45  | 135.08 | 6.74  | 0.08 |
| chr16 | 20498406 | 20499496 | 1091 | 549  | 48  | 98.17  | 7.12  | 0.08 |
| chr16 | 20516524 | 20517764 | 1241 | 573  | 60  | 212.38 | 9.99  | 0    |
| chr16 | 20535032 | 20536078 | 1047 | 406  | 51  | 96.55  | 6.42  | 0.08 |
| chr16 | 20537140 | 20538339 | 1200 | 415  | 44  | 93.22  | 5.13  | 0.07 |
| chr16 | 20610275 | 20611180 | 906  | 413  | 35  | 90.78  | 6.39  | 0.07 |
| chr16 | 20611309 | 20612160 | 852  | 345  | 33  | 98.67  | 6.66  | 0.08 |
| chr16 | 20651217 | 20652065 | 849  | 423  | 53  | 128.69 | 6.79  | 0.08 |
| chr16 | 20672204 | 20673362 | 1159 | 540  | 53  | 150.25 | 7.69  | 0.1  |
| chr16 | 21310419 | 21311545 | 1127 | 736  | 50  | 97.19  | 6.22  | 0.08 |
| chr16 | 21332738 | 21334144 | 1407 | 572  | 83  | 204.88 | 7.22  | 0    |
| chr16 | 21693746 | 21695236 | 1491 | 436  | 76  | 124.78 | 5.03  | 0.07 |
| chr16 | 22009074 | 22010490 | 1417 | 498  | 60  | 93.78  | 6.07  | 0.07 |
| chr16 | 22265584 | 22266382 | 799  | 484  | 27  | 76.45  | 7.08  | 0.12 |
| chr16 | 22439178 | 22440346 | 1169 | 704  | 47  | 108.35 | 6.55  | 0.06 |
| chr16 | 22856755 | 22858422 | 1668 | 857  | 77  | 101.14 | 4.9   | 0.08 |
| chr16 | 23107006 | 23108907 | 1902 | 904  | 122 | 213.43 | 5.96  | 0    |
| chr16 | 23127313 | 23128501 | 1189 | 469  | 57  | 169.33 | 9.71  | 0.06 |
| chr16 | 23984153 | 23985185 | 1033 | 835  | 46  | 95.36  | 4.82  | 0.07 |
| chr16 | 23987988 | 23989322 | 1335 | 685  | 73  | 278.94 | 11.1  | 0    |
| chr16 | 24392993 | 24394001 | 1009 | 572  | 41  | 132.35 | 6.99  | 0.08 |
| chr16 | 25041568 | 25042890 | 1323 | 1037 | 52  | 71.73  | 4.46  | 0.15 |
| chr16 | 25052527 | 25053542 | 1016 | 556  | 45  | 105.13 | 6.33  | 0.06 |
| chr16 | 25058813 | 25060317 | 1505 | 547  | 66  | 156.48 | 6.68  | 0.11 |
| chr16 | 27388684 | 27389521 | 838  | 451  | 27  | 75.04  | 7.31  | 0.13 |
| chr16 | 29945491 | 29946537 | 1047 | 548  | 51  | 139.8  | 7.36  | 0.09 |
| chr16 | 30510218 | 30511371 | 1154 | 624  | 52  | 163.4  | 8.09  | 0.06 |
| chr16 | 30587413 | 30588480 | 1068 | 580  | 40  | 74.93  | 5.28  | 0.13 |
| chr16 | 31200054 | 31201981 | 1928 | 734  | 81  | 93.1   | 4.05  | 0.07 |
| chr16 | 31935135 | 31936084 | 950  | 450  | 36  | 74.59  | 4.78  | 0.13 |
| chr16 | 31947714 | 31949072 | 1359 | 869  | 86  | 147.05 | 6.6   | 0.09 |
| chr16 | 32163871 | 32166195 | 2325 | 1620 | 119 | 190.81 | 5.56  | 0    |
| chr16 | 32246798 | 32247873 | 1076 | 512  | 54  | 199.87 | 16.18 | 0    |
| chr16 | 32277156 | 32278407 | 1252 | 386  | 53  | 89.54  | 4.79  | 0.07 |
| chr16 | 32331899 | 32332978 | 1080 | 501  | 57  | 153.23 | 9.78  | 0.1  |
| chr16 | 32430377 | 32431456 | 1080 | 697  | 51  | 108.25 | 5.6   | 0.06 |
| chr16 | 32877160 | 32878393 | 1234 | 611  | 58  | 91.48  | 5.74  | 0.07 |

|       |          |          |      |      |     |        |       |      |
|-------|----------|----------|------|------|-----|--------|-------|------|
| chr16 | 32913785 | 32915083 | 1299 | 472  | 58  | 215.14 | 11.33 | 0    |
| chr16 | 33056032 | 33057289 | 1258 | 582  | 61  | 118.24 | 6.65  | 0.07 |
| chr16 | 33178340 | 33179319 | 980  | 518  | 35  | 76.65  | 6.07  | 0.12 |
| chr16 | 33184791 | 33186144 | 1354 | 490  | 64  | 147.99 | 7.08  | 0.1  |
| chr16 | 33250936 | 33252107 | 1172 | 493  | 53  | 111.32 | 5.5   | 0.06 |
| chr16 | 33380424 | 33381169 | 746  | 554  | 38  | 134.15 | 10.78 | 0.08 |
| chr16 | 33829649 | 33830940 | 1292 | 717  | 58  | 169.26 | 7.66  | 0.06 |
| chr16 | 33891508 | 33892472 | 965  | 575  | 40  | 86.85  | 4.92  | 0.07 |
| chr16 | 33921656 | 33922957 | 1302 | 820  | 54  | 127.58 | 6.93  | 0.07 |
| chr16 | 35021897 | 35022865 | 969  | 544  | 39  | 146.27 | 9.32  | 0.09 |
| chr16 | 35938137 | 35939519 | 1383 | 920  | 57  | 85.62  | 5.2   | 0.07 |
| chr16 | 35983005 | 35984424 | 1420 | 1222 | 48  | 164.8  | 7.51  | 0.06 |
| chr16 | 36040743 | 36041750 | 1008 | 463  | 47  | 110.47 | 6.07  | 0.06 |
| chr16 | 36071087 | 36072523 | 1437 | 692  | 84  | 113.22 | 5.92  | 0.06 |
| chr16 | 37539416 | 37540496 | 1081 | 416  | 54  | 122.99 | 6.53  | 0.07 |
| chr16 | 37867915 | 37869163 | 1249 | 677  | 50  | 152.44 | 6.37  | 0.1  |
| chr16 | 38087816 | 38090423 | 2608 | 1101 | 134 | 182.64 | 4.16  | 0    |
| chr16 | 38346765 | 38347844 | 1080 | 651  | 50  | 87.7   | 6.14  | 0.07 |
| chr16 | 38452338 | 38453533 | 1196 | 501  | 54  | 100.77 | 5.69  | 0.08 |
| chr16 | 38522180 | 38523327 | 1148 | 608  | 58  | 155.45 | 7.39  | 0.11 |
| chr16 | 38549732 | 38550861 | 1130 | 538  | 54  | 75.25  | 5.47  | 0.13 |
| chr16 | 38562393 | 38563407 | 1015 | 551  | 53  | 156.79 | 12.5  | 0.11 |
| chr16 | 38712002 | 38713503 | 1502 | 978  | 68  | 165.58 | 6.99  | 0.06 |
| chr16 | 42874758 | 42876135 | 1378 | 947  | 78  | 211.38 | 8.41  | 0    |
| chr16 | 42876143 | 42876808 | 666  | 248  | 24  | 86.38  | 8.74  | 0.07 |
| chr16 | 43889443 | 43890545 | 1103 | 392  | 47  | 124.14 | 6.47  | 0.07 |
| chr16 | 44138547 | 44141269 | 2723 | 1204 | 167 | 547.84 | 10.65 | 0    |
| chr16 | 44347029 | 44348149 | 1121 | 849  | 40  | 122.31 | 8.09  | 0.07 |
| chr16 | 44724067 | 44725188 | 1122 | 659  | 49  | 132.69 | 8.09  | 0.08 |
| chr16 | 45158244 | 45159553 | 1310 | 498  | 69  | 192.32 | 7.77  | 0    |
| chr16 | 45742519 | 45743523 | 1005 | 466  | 42  | 91.57  | 7.39  | 0.07 |
| chr16 | 49854768 | 49856559 | 1792 | 795  | 144 | 527.18 | 10.27 | 0    |
| chr16 | 50431976 | 50432767 | 792  | 461  | 33  | 121.2  | 8.63  | 0.07 |
| chr16 | 50528599 | 50529739 | 1141 | 556  | 47  | 164.13 | 9.71  | 0.06 |
| chr16 | 50736566 | 50737565 | 1000 | 583  | 48  | 105.04 | 6.22  | 0.06 |
| chr16 | 55821289 | 55822802 | 1514 | 931  | 75  | 213.88 | 10.79 | 0    |
| chr16 | 55973281 | 55975217 | 1937 | 516  | 91  | 226.99 | 6.99  | 0    |
| chr16 | 56029399 | 56030426 | 1028 | 588  | 44  | 87.53  | 5.18  | 0.07 |
| chr16 | 56037259 | 56038538 | 1280 | 524  | 65  | 156.29 | 5.5   | 0.11 |
| chr16 | 56075250 | 56076434 | 1185 | 775  | 41  | 131.39 | 6.99  | 0.08 |
| chr16 | 57121032 | 57122258 | 1227 | 505  | 49  | 106.35 | 5.78  | 0.06 |
| chr16 | 57391439 | 57392007 | 569  | 309  | 37  | 127.58 | 8.55  | 0.07 |
| chr16 | 59638845 | 59639821 | 977  | 546  | 47  | 203.24 | 13.98 | 0    |
| chr16 | 62785951 | 62787247 | 1297 | 530  | 64  | 194.36 | 8.5   | 0    |

|       |          |          |      |      |     |        |       |      |
|-------|----------|----------|------|------|-----|--------|-------|------|
| chr16 | 64769892 | 64771254 | 1363 | 516  | 61  | 240.9  | 10.98 | 0    |
| chr16 | 64850992 | 64852439 | 1448 | 565  | 87  | 229.1  | 8.69  | 0    |
| chr16 | 65562421 | 65563327 | 907  | 362  | 38  | 95.1   | 6.16  | 0.07 |
| chr16 | 70314087 | 70315270 | 1184 | 763  | 50  | 162.51 | 10.85 | 0.12 |
| chr16 | 76373071 | 76374207 | 1137 | 446  | 52  | 191.8  | 9.34  | 0    |
| chr16 | 84834583 | 84836275 | 1693 | 615  | 86  | 132.85 | 5.39  | 0.08 |
| chr16 | 85173522 | 85174370 | 849  | 362  | 38  | 97.46  | 6.62  | 0.08 |
| chr16 | 87432281 | 87433278 | 998  | 607  | 36  | 74.29  | 4.62  | 0.13 |
| chr16 | 87440308 | 87441165 | 858  | 368  | 44  | 144.23 | 11.73 | 0.09 |
| chr16 | 87454757 | 87455775 | 1019 | 484  | 43  | 84.05  | 5.83  | 0.06 |
| chr16 | 87698699 | 87700883 | 2185 | 559  | 106 | 295.09 | 11    | 0    |
| chr16 | 90283988 | 90285646 | 1659 | 786  | 79  | 236.32 | 7.13  | 0    |
| chr16 | 90727045 | 90728329 | 1285 | 678  | 63  | 170.48 | 6.99  | 0.06 |
| chr16 | 90934635 | 90935887 | 1253 | 537  | 61  | 183.24 | 7.69  | 0    |
| chr16 | 91010910 | 91012737 | 1828 | 857  | 118 | 268.76 | 6.32  | 0    |
| chr16 | 91372575 | 91374446 | 1872 | 793  | 84  | 166.29 | 5.18  | 0.06 |
| chr16 | 91405751 | 91407784 | 2034 | 857  | 133 | 411.98 | 9.06  | 0    |
| chr16 | 91484693 | 91486146 | 1454 | 396  | 78  | 147.17 | 7.57  | 0.1  |
| chr16 | 91546396 | 91550242 | 3847 | 1495 | 230 | 621.44 | 8.8   | 0    |
| chr16 | 91646800 | 91648839 | 2040 | 1405 | 164 | 721.65 | 14.2  | 0    |
| chr16 | 91688487 | 91689502 | 1016 | 408  | 45  | 111.36 | 6.62  | 0.06 |
| chr16 | 91728442 | 91730005 | 1564 | 1091 | 84  | 96.04  | 4.15  | 0.08 |
| chr16 | 92019307 | 92020206 | 900  | 372  | 32  | 93.45  | 8.6   | 0.07 |
| chr16 | 92057944 | 92058938 | 995  | 551  | 44  | 102.88 | 7.04  | 0.06 |
| chr16 | 92300958 | 92301878 | 921  | 501  | 35  | 83.31  | 5.66  | 0.06 |
| chr16 | 92465858 | 92466793 | 936  | 447  | 41  | 107.32 | 5.78  | 0.06 |
| chr16 | 92696481 | 92698273 | 1793 | 1192 | 91  | 118.98 | 4.49  | 0.07 |
| chr16 | 93603664 | 93604952 | 1289 | 533  | 68  | 126.82 | 6.52  | 0.07 |
| chr16 | 93711390 | 93712742 | 1353 | 964  | 65  | 153.33 | 5.73  | 0.1  |
| chr16 | 93831970 | 93833405 | 1436 | 739  | 83  | 151.48 | 6.19  | 0.1  |
| chr16 | 94534056 | 94535548 | 1493 | 982  | 79  | 196.89 | 6.47  | 0    |
| chr16 | 94591603 | 94593049 | 1447 | 382  | 69  | 189.44 | 8.86  | 0    |
| chr16 | 94747317 | 94749246 | 1930 | 1375 | 126 | 235.8  | 7     | 0    |
| chr16 | 94789896 | 94791805 | 1910 | 1548 | 111 | 367.99 | 11.17 | 0    |
| chr16 | 94791894 | 94793113 | 1220 | 515  | 65  | 250.96 | 8.57  | 0    |
| chr16 | 96212022 | 96213091 | 1070 | 509  | 44  | 87.63  | 6.41  | 0.07 |
| chr16 | 96303503 | 96304920 | 1418 | 536  | 69  | 205.09 | 8.9   | 0    |
| chr16 | 96348741 | 96349363 | 623  | 457  | 22  | 78.79  | 6.99  | 0.12 |
| chr16 | 96349446 | 96350193 | 748  | 273  | 27  | 82.38  | 7.59  | 0.11 |
| chr16 | 98143571 | 98144388 | 818  | 192  | 31  | 85.45  | 5.39  | 0.07 |
| chr16 | 98182975 | 98184212 | 1238 | 734  | 59  | 131.66 | 7.44  | 0.08 |
| chr17 | 3083730  | 3084968  | 1239 | 576  | 77  | 138.91 | 10.06 | 0.09 |
| chr17 | 3114074  | 3115851  | 1778 | 931  | 102 | 318.96 | 9.19  | 0    |
| chr17 | 4993830  | 4996509  | 2680 | 2060 | 140 | 510.22 | 12.37 | 0    |

|       |          |          |      |      |     |        |       |      |
|-------|----------|----------|------|------|-----|--------|-------|------|
| chr17 | 5189391  | 5190615  | 1225 | 766  | 59  | 157.23 | 6.25  | 0.11 |
| chr17 | 5439933  | 5441175  | 1243 | 435  | 50  | 148.26 | 7.61  | 0.1  |
| chr17 | 5491102  | 5492716  | 1615 | 498  | 72  | 192.7  | 8.5   | 0    |
| chr17 | 5841073  | 5842553  | 1481 | 338  | 58  | 173.6  | 9.28  | 0.07 |
| chr17 | 5848962  | 5849975  | 1014 | 568  | 44  | 127.1  | 8.09  | 0.07 |
| chr17 | 6007335  | 6009244  | 1910 | 1389 | 94  | 210.25 | 5.5   | 0    |
| chr17 | 6079193  | 6080388  | 1196 | 641  | 75  | 149.62 | 9.25  | 0.1  |
| chr17 | 6986649  | 6987982  | 1334 | 661  | 63  | 172.34 | 6.93  | 0.07 |
| chr17 | 7373284  | 7374609  | 1326 | 449  | 67  | 92.85  | 3.88  | 0.07 |
| chr17 | 8475576  | 8477060  | 1485 | 968  | 64  | 75.27  | 4.17  | 0.13 |
| chr17 | 8503557  | 8504443  | 887  | 328  | 38  | 102.53 | 8.01  | 0.06 |
| chr17 | 10510612 | 10511599 | 988  | 401  | 41  | 128.57 | 8.09  | 0.08 |
| chr17 | 10512093 | 10513532 | 1440 | 711  | 79  | 216.34 | 7.75  | 0    |
| chr17 | 10895395 | 10896307 | 913  | 520  | 30  | 92.27  | 7.96  | 0.07 |
| chr17 | 13108513 | 13109909 | 1397 | 475  | 58  | 106.11 | 4.85  | 0.06 |
| chr17 | 13183765 | 13186089 | 2325 | 1748 | 99  | 229.58 | 6.55  | 0    |
| chr17 | 15079771 | 15080824 | 1054 | 494  | 47  | 92.85  | 6.53  | 0.07 |
| chr17 | 15700776 | 15701741 | 966  | 455  | 42  | 76.71  | 4.49  | 0.12 |
| chr17 | 15840891 | 15842072 | 1182 | 718  | 47  | 82.71  | 5.18  | 0.11 |
| chr17 | 15962960 | 15964148 | 1189 | 377  | 46  | 151.01 | 7.01  | 0.1  |
| chr17 | 17760985 | 17763113 | 2129 | 637  | 150 | 465.44 | 8.76  | 0    |
| chr17 | 17963546 | 17964332 | 787  | 292  | 31  | 96.54  | 7.22  | 0.08 |
| chr17 | 17974610 | 17976077 | 1468 | 721  | 72  | 203.61 | 8.09  | 0    |
| chr17 | 21081595 | 21083132 | 1538 | 479  | 68  | 88.65  | 4.55  | 0.07 |
| chr17 | 21145326 | 21146331 | 1006 | 659  | 46  | 167.4  | 9.1   | 0.06 |
| chr17 | 21586759 | 21587879 | 1121 | 636  | 44  | 87.11  | 5.28  | 0.07 |
| chr17 | 21653394 | 21654414 | 1021 | 708  | 39  | 80.66  | 4.78  | 0.1  |
| chr17 | 21870469 | 21871049 | 581  | 282  | 25  | 98.36  | 7.01  | 0.08 |
| chr17 | 23329778 | 23330384 | 607  | 409  | 21  | 73.74  | 6.93  | 0.13 |
| chr17 | 23682985 | 23684685 | 1701 | 563  | 74  | 111.07 | 6.7   | 0.06 |
| chr17 | 23686851 | 23687755 | 905  | 467  | 37  | 75.1   | 7.42  | 0.13 |
| chr17 | 23735775 | 23736851 | 1077 | 531  | 43  | 77.23  | 4.85  | 0.12 |
| chr17 | 23876974 | 23877632 | 659  | 423  | 32  | 92.73  | 5.88  | 0.07 |
| chr17 | 23908162 | 23908968 | 807  | 376  | 30  | 76.05  | 7.24  | 0.12 |
| chr17 | 23927182 | 23928005 | 824  | 315  | 31  | 84.81  | 9.04  | 0.06 |
| chr17 | 23939359 | 23941080 | 1722 | 789  | 87  | 113.33 | 4.49  | 0.06 |
| chr17 | 24209971 | 24210811 | 841  | 477  | 49  | 130.82 | 6.59  | 0.08 |
| chr17 | 24277789 | 24279016 | 1228 | 756  | 86  | 317.62 | 11.61 | 0    |
| chr17 | 24298549 | 24301022 | 2474 | 1932 | 141 | 172.08 | 5.92  | 0.06 |
| chr17 | 24303569 | 24307293 | 3725 | 2926 | 221 | 498.48 | 6.42  | 0    |
| chr17 | 24387802 | 24388859 | 1058 | 380  | 36  | 115.24 | 6.35  | 0.06 |
| chr17 | 24550824 | 24552070 | 1247 | 769  | 68  | 153.99 | 8.67  | 0.1  |
| chr17 | 24591286 | 24592587 | 1302 | 567  | 89  | 133.86 | 5.03  | 0.08 |
| chr17 | 24606715 | 24607780 | 1066 | 475  | 49  | 76.29  | 5.48  | 0.12 |

|       |          |          |      |      |     |        |       |      |
|-------|----------|----------|------|------|-----|--------|-------|------|
| chr17 | 24615323 | 24616548 | 1226 | 685  | 68  | 244.68 | 11.92 | 0    |
| chr17 | 24664233 | 24665672 | 1440 | 496  | 69  | 98.53  | 5.39  | 0.08 |
| chr17 | 24686277 | 24687833 | 1557 | 690  | 105 | 265.61 | 8.09  | 0    |
| chr17 | 24769028 | 24770361 | 1334 | 425  | 50  | 117.37 | 7.16  | 0.07 |
| chr17 | 24806117 | 24807110 | 994  | 469  | 40  | 121.65 | 9.99  | 0.07 |
| chr17 | 24832594 | 24833450 | 857  | 445  | 35  | 87.43  | 7.04  | 0.07 |
| chr17 | 24844093 | 24845173 | 1081 | 525  | 65  | 140.77 | 9.35  | 0.09 |
| chr17 | 24856357 | 24857494 | 1138 | 556  | 66  | 148.4  | 7.55  | 0.1  |
| chr17 | 24872579 | 24874094 | 1516 | 964  | 77  | 140.64 | 6.2   | 0.09 |
| chr17 | 24986585 | 24987988 | 1404 | 766  | 78  | 75.03  | 4.05  | 0.13 |
| chr17 | 25022748 | 25024159 | 1412 | 792  | 67  | 131.38 | 5.99  | 0.08 |
| chr17 | 25031401 | 25032600 | 1200 | 550  | 59  | 94.96  | 5.82  | 0.07 |
| chr17 | 25269927 | 25270919 | 993  | 576  | 38  | 74.17  | 4.92  | 0.13 |
| chr17 | 25409375 | 25411701 | 2327 | 1060 | 152 | 319.15 | 7.61  | 0    |
| chr17 | 25864025 | 25865109 | 1085 | 521  | 47  | 79.1   | 4.91  | 0.1  |
| chr17 | 25928863 | 25930185 | 1323 | 640  | 60  | 148.17 | 6.62  | 0.1  |
| chr17 | 25969187 | 25970980 | 1794 | 974  | 134 | 487.36 | 11.27 | 0    |
| chr17 | 25980934 | 25981906 | 973  | 474  | 53  | 156.4  | 8.79  | 0.11 |
| chr17 | 26004801 | 26005734 | 934  | 469  | 37  | 71.69  | 6.41  | 0.15 |
| chr17 | 26011254 | 26012552 | 1299 | 737  | 62  | 79.87  | 6.47  | 0.1  |
| chr17 | 26078368 | 26079277 | 910  | 397  | 36  | 95.73  | 8.94  | 0.08 |
| chr17 | 26249835 | 26250793 | 959  | 431  | 41  | 98.16  | 9.19  | 0.08 |
| chr17 | 26260211 | 26261047 | 837  | 284  | 35  | 78.56  | 6.33  | 0.12 |
| chr17 | 26275193 | 26276445 | 1253 | 492  | 51  | 97.97  | 6.07  | 0.08 |
| chr17 | 26380241 | 26381910 | 1670 | 849  | 75  | 212.3  | 6.76  | 0    |
| chr17 | 26389358 | 26390286 | 929  | 493  | 41  | 76.93  | 5.99  | 0.12 |
| chr17 | 26573949 | 26574868 | 920  | 723  | 35  | 83.43  | 5.26  | 0.06 |
| chr17 | 26642840 | 26646330 | 3491 | 2495 | 220 | 341.93 | 6.43  | 0    |
| chr17 | 26697902 | 26698830 | 929  | 491  | 36  | 93.34  | 7.66  | 0.07 |
| chr17 | 26812857 | 26813985 | 1129 | 561  | 52  | 112.33 | 6.47  | 0.06 |
| chr17 | 26851886 | 26853836 | 1951 | 529  | 93  | 235.9  | 8.46  | 0    |
| chr17 | 26917883 | 26918596 | 714  | 182  | 28  | 80.59  | 6.22  | 0.1  |
| chr17 | 27075887 | 27077352 | 1466 | 897  | 94  | 174.82 | 6.12  | 0.07 |
| chr17 | 27270178 | 27271114 | 937  | 619  | 43  | 72.08  | 4.58  | 0.15 |
| chr17 | 27340154 | 27342042 | 1889 | 501  | 89  | 267.03 | 8.13  | 0    |
| chr17 | 27691799 | 27694644 | 2846 | 1612 | 154 | 481.48 | 9.52  | 0    |
| chr17 | 27701689 | 27703183 | 1495 | 1039 | 69  | 129.37 | 5.09  | 0.08 |
| chr17 | 27759471 | 27760764 | 1294 | 806  | 57  | 95.86  | 4.91  | 0.08 |
| chr17 | 27771620 | 27772675 | 1056 | 550  | 48  | 144.7  | 9.79  | 0.09 |
| chr17 | 27957076 | 27958318 | 1243 | 680  | 61  | 102.73 | 6     | 0.06 |
| chr17 | 28044257 | 28045212 | 956  | 492  | 45  | 96.67  | 6.85  | 0.08 |
| chr17 | 28046015 | 28047665 | 1651 | 696  | 68  | 113.14 | 5.29  | 0.06 |
| chr17 | 28343698 | 28345270 | 1573 | 1014 | 65  | 136.88 | 6.33  | 0.08 |
| chr17 | 28464939 | 28465917 | 979  | 674  | 55  | 159.6  | 7.75  | 0.11 |

|       |          |          |      |      |     |        |       |      |
|-------|----------|----------|------|------|-----|--------|-------|------|
| chr17 | 28827590 | 28829383 | 1794 | 829  | 83  | 85.61  | 3.72  | 0.07 |
| chr17 | 28937358 | 28938245 | 888  | 471  | 37  | 117.98 | 9.52  | 0.07 |
| chr17 | 28938256 | 28939146 | 891  | 287  | 53  | 217.91 | 13.93 | 0    |
| chr17 | 29088752 | 29090141 | 1390 | 869  | 75  | 291.87 | 12.45 | 0    |
| chr17 | 29143760 | 29145597 | 1838 | 1409 | 87  | 338.58 | 9.36  | 0    |
| chr17 | 29168843 | 29170464 | 1622 | 618  | 94  | 214.57 | 6.7   | 0    |
| chr17 | 29230239 | 29231323 | 1085 | 509  | 51  | 77.62  | 7.33  | 0.12 |
| chr17 | 29231609 | 29233016 | 1408 | 817  | 67  | 80.19  | 3.82  | 0.1  |
| chr17 | 29400327 | 29401480 | 1154 | 445  | 49  | 106.94 | 5.28  | 0.06 |
| chr17 | 29405339 | 29406381 | 1043 | 527  | 49  | 88.22  | 4.74  | 0.07 |
| chr17 | 29571355 | 29572909 | 1555 | 1070 | 59  | 74.02  | 4.18  | 0.13 |
| chr17 | 29573738 | 29574744 | 1007 | 587  | 48  | 115.81 | 8.43  | 0.07 |
| chr17 | 29626912 | 29628345 | 1434 | 884  | 81  | 149.75 | 5.64  | 0.1  |
| chr17 | 29686322 | 29687251 | 930  | 416  | 36  | 99.5   | 9.89  | 0.08 |
| chr17 | 29797028 | 29798168 | 1141 | 679  | 53  | 103.49 | 7.49  | 0.06 |
| chr17 | 29853391 | 29854308 | 918  | 466  | 35  | 78.41  | 5.39  | 0.12 |
| chr17 | 30140989 | 30142095 | 1107 | 527  | 51  | 116.8  | 6.41  | 0.07 |
| chr17 | 30712897 | 30713911 | 1015 | 518  | 67  | 209.16 | 9.65  | 0    |
| chr17 | 31648580 | 31649736 | 1157 | 628  | 71  | 280.17 | 14.48 | 0    |
| chr17 | 31656341 | 31657618 | 1278 | 744  | 65  | 115.08 | 6.52  | 0.06 |
| chr17 | 31700544 | 31702955 | 2412 | 1217 | 121 | 232.38 | 6.07  | 0    |
| chr17 | 31795281 | 31796442 | 1162 | 583  | 56  | 87.75  | 6.57  | 0.07 |
| chr17 | 31971512 | 31973044 | 1533 | 301  | 57  | 130.09 | 6.54  | 0.08 |
| chr17 | 31978100 | 31979006 | 907  | 447  | 32  | 72.96  | 6.26  | 0.15 |
| chr17 | 32172719 | 32173919 | 1201 | 607  | 70  | 250.96 | 12.14 | 0    |
| chr17 | 32420624 | 32422288 | 1665 | 1133 | 72  | 272.4  | 16.76 | 0    |
| chr17 | 32457591 | 32458736 | 1146 | 598  | 61  | 122.56 | 5.12  | 0.07 |
| chr17 | 32486852 | 32488034 | 1183 | 606  | 65  | 112.32 | 7.14  | 0.06 |
| chr17 | 32924455 | 32925581 | 1127 | 695  | 41  | 127.67 | 7.01  | 0.07 |
| chr17 | 33027942 | 33028799 | 858  | 262  | 38  | 85.9   | 6.07  | 0.07 |
| chr17 | 33531303 | 33532155 | 853  | 392  | 30  | 101.8  | 9.32  | 0.05 |
| chr17 | 33691355 | 33693280 | 1926 | 1344 | 97  | 248.62 | 9.5   | 0    |
| chr17 | 33693325 | 33694385 | 1061 | 491  | 40  | 96.74  | 6.71  | 0.08 |
| chr17 | 33694463 | 33696497 | 2035 | 478  | 94  | 192.36 | 6.8   | 0    |
| chr17 | 33698746 | 33701759 | 3014 | 1169 | 144 | 291.68 | 5.38  | 0    |
| chr17 | 33821609 | 33822987 | 1379 | 882  | 86  | 161.07 | 7.42  | 0.11 |
| chr17 | 33896518 | 33897946 | 1429 | 620  | 62  | 89.17  | 4.05  | 0.07 |
| chr17 | 33953784 | 33955240 | 1457 | 485  | 89  | 261.11 | 8.41  | 0    |
| chr17 | 34045516 | 34047371 | 1856 | 575  | 93  | 154.9  | 5.22  | 0.1  |
| chr17 | 34056063 | 34057365 | 1303 | 739  | 63  | 87.65  | 5     | 0.07 |
| chr17 | 34065558 | 34068964 | 3407 | 895  | 187 | 361.97 | 7.55  | 0    |
| chr17 | 34092076 | 34093469 | 1394 | 933  | 73  | 140.47 | 7.01  | 0.09 |
| chr17 | 34115196 | 34116268 | 1073 | 532  | 53  | 91.91  | 6.26  | 0.07 |
| chr17 | 34136685 | 34137703 | 1019 | 497  | 68  | 214.54 | 11.2  | 0    |

|       |          |          |      |      |     |         |       |      |
|-------|----------|----------|------|------|-----|---------|-------|------|
| chr17 | 34161011 | 34162108 | 1098 | 580  | 55  | 169.26  | 11.16 | 0.06 |
| chr17 | 34168016 | 34169735 | 1720 | 835  | 103 | 267.2   | 7.79  | 0    |
| chr17 | 34175336 | 34176278 | 943  | 402  | 37  | 103.5   | 5.84  | 0.06 |
| chr17 | 34253471 | 34260878 | 7408 | 2735 | 584 | 1846.64 | 15.83 | 0    |
| chr17 | 34334331 | 34335943 | 1613 | 1019 | 68  | 103.78  | 7.22  | 0.06 |
| chr17 | 34376296 | 34377332 | 1037 | 544  | 41  | 94.14   | 6.16  | 0.07 |
| chr17 | 34723669 | 34725157 | 1489 | 1048 | 82  | 152.69  | 5.82  | 0.1  |
| chr17 | 34726432 | 34727559 | 1128 | 526  | 48  | 105.35  | 6.68  | 0.06 |
| chr17 | 34727792 | 34729842 | 2051 | 1248 | 109 | 342.94  | 11.21 | 0    |
| chr17 | 34739910 | 34741696 | 1787 | 784  | 109 | 148.12  | 4.24  | 0.1  |
| chr17 | 34742242 | 34743334 | 1093 | 527  | 45  | 79.17   | 6.85  | 0.1  |
| chr17 | 34764090 | 34765396 | 1307 | 776  | 58  | 98.5    | 6.07  | 0.08 |
| chr17 | 34768756 | 34770104 | 1349 | 619  | 64  | 140.74  | 6.47  | 0.09 |
| chr17 | 34783447 | 34784869 | 1423 | 587  | 85  | 148.96  | 5.84  | 0.1  |
| chr17 | 34973101 | 34974464 | 1364 | 838  | 84  | 218.6   | 10.69 | 0    |
| chr17 | 34986707 | 34987817 | 1111 | 565  | 55  | 90.42   | 6.57  | 0.07 |
| chr17 | 35030776 | 35031743 | 968  | 440  | 37  | 72.42   | 7.04  | 0.15 |
| chr17 | 35034726 | 35035714 | 989  | 463  | 45  | 144.97  | 10.34 | 0.09 |
| chr17 | 35035958 | 35036919 | 962  | 291  | 39  | 100.77  | 5.74  | 0.08 |
| chr17 | 35067783 | 35068862 | 1080 | 576  | 50  | 74.33   | 6.32  | 0.13 |
| chr17 | 35118367 | 35119500 | 1134 | 613  | 50  | 174.2   | 8.6   | 0.07 |
| chr17 | 35137588 | 35138477 | 890  | 255  | 45  | 143.27  | 8.4   | 0.09 |
| chr17 | 35182982 | 35184336 | 1355 | 822  | 62  | 162.57  | 8.82  | 0.12 |
| chr17 | 35184636 | 35185621 | 986  | 277  | 37  | 73.28   | 4.7   | 0.13 |
| chr17 | 35186307 | 35187952 | 1646 | 518  | 89  | 194.68  | 6.93  | 0    |
| chr17 | 35187984 | 35189378 | 1395 | 756  | 83  | 226.78  | 9.96  | 0    |
| chr17 | 35195518 | 35196627 | 1110 | 512  | 58  | 210.02  | 10.34 | 0    |
| chr17 | 35225857 | 35226867 | 1011 | 474  | 53  | 78.97   | 6.29  | 0.1  |
| chr17 | 35257611 | 35258752 | 1142 | 807  | 55  | 86.92   | 4.18  | 0.07 |
| chr17 | 35262790 | 35264322 | 1533 | 552  | 73  | 149.98  | 8.06  | 0.1  |
| chr17 | 35271362 | 35272947 | 1586 | 838  | 98  | 212.82  | 7.33  | 0    |
| chr17 | 35301054 | 35302792 | 1739 | 656  | 94  | 303.51  | 7.61  | 0    |
| chr17 | 35322632 | 35324113 | 1482 | 548  | 69  | 195.04  | 11.33 | 0    |
| chr17 | 35324752 | 35325614 | 863  | 435  | 34  | 75.12   | 5.88  | 0.13 |
| chr17 | 35337015 | 35339430 | 2416 | 1915 | 131 | 218.25  | 10.3  | 0    |
| chr17 | 35371469 | 35373448 | 1980 | 1420 | 93  | 164.51  | 4.91  | 0.06 |
| chr17 | 35377989 | 35380381 | 2393 | 740  | 144 | 256.66  | 6.01  | 0    |
| chr17 | 35399387 | 35400581 | 1195 | 683  | 74  | 187.47  | 9.76  | 0    |
| chr17 | 35516067 | 35517073 | 1007 | 536  | 38  | 88.49   | 7.69  | 0.07 |
| chr17 | 35803975 | 35805081 | 1107 | 607  | 48  | 90.65   | 5.29  | 0.07 |
| chr17 | 35958122 | 35960938 | 2817 | 1836 | 163 | 438.55  | 7.49  | 0    |
| chr17 | 35973382 | 35974731 | 1350 | 505  | 67  | 198.5   | 6.31  | 0    |
| chr17 | 35974844 | 35975945 | 1102 | 380  | 55  | 157.27  | 8.52  | 0.11 |
| chr17 | 35977708 | 35979048 | 1341 | 534  | 73  | 148.74  | 6.2   | 0.1  |

|       |          |          |      |      |      |         |       |      |
|-------|----------|----------|------|------|------|---------|-------|------|
| chr17 | 35997774 | 35998884 | 1111 | 620  | 46   | 81.38   | 5.6   | 0.1  |
| chr17 | 36002512 | 36004154 | 1643 | 1094 | 74   | 183     | 6.4   | 0    |
| chr17 | 36004250 | 36006287 | 2038 | 1030 | 96   | 244.97  | 8.24  | 0    |
| chr17 | 36046446 | 36047497 | 1052 | 589  | 47   | 110.45  | 8.44  | 0.06 |
| chr17 | 36052623 | 36057521 | 4899 | 1334 | 386  | 1123.66 | 12.01 | 0    |
| chr17 | 36115824 | 36117136 | 1313 | 920  | 60   | 100.83  | 5.03  | 0.08 |
| chr17 | 36367751 | 36368981 | 1231 | 488  | 72   | 103.58  | 7.69  | 0.06 |
| chr17 | 36394257 | 36395307 | 1051 | 664  | 39   | 97.24   | 4.78  | 0.08 |
| chr17 | 36407837 | 36409144 | 1308 | 612  | 73   | 215.41  | 7.39  | 0    |
| chr17 | 36972892 | 36974574 | 1683 | 1044 | 62   | 92.21   | 5.83  | 0.07 |
| chr17 | 37088293 | 37089128 | 836  | 470  | 41   | 111.81  | 7.12  | 0.06 |
| chr17 | 37094954 | 37096036 | 1083 | 660  | 49   | 116.47  | 6.33  | 0.07 |
| chr17 | 39979790 | 39986237 | 6448 | 3247 | 4887 | 1188.37 | 2.65  | 0    |
| chr17 | 44913481 | 44915033 | 1553 | 495  | 79   | 197.24  | 8.09  | 0    |
| chr17 | 45643406 | 45644374 | 969  | 531  | 37   | 93.82   | 7.24  | 0.07 |
| chr17 | 45692114 | 45693009 | 896  | 480  | 35   | 81.01   | 7.32  | 0.1  |
| chr17 | 45700350 | 45701466 | 1117 | 511  | 59   | 129.79  | 9.25  | 0.08 |
| chr17 | 45708993 | 45711400 | 2408 | 1108 | 144  | 486.19  | 12.71 | 0    |
| chr17 | 45822356 | 45823713 | 1358 | 666  | 60   | 236.18  | 9.32  | 0    |
| chr17 | 46167069 | 46168705 | 1637 | 822  | 73   | 163.24  | 5.63  | 0.06 |
| chr17 | 46168789 | 46169725 | 937  | 514  | 44   | 111.15  | 10.55 | 0.06 |
| chr17 | 46289979 | 46290844 | 866  | 536  | 38   | 83.63   | 7.34  | 0.06 |
| chr17 | 46297343 | 46298349 | 1007 | 502  | 44   | 90.2    | 8.74  | 0.07 |
| chr17 | 46384549 | 46385450 | 902  | 518  | 47   | 77.88   | 6.19  | 0.12 |
| chr17 | 46464336 | 46465455 | 1120 | 559  | 50   | 201.37  | 12.22 | 0    |
| chr17 | 46782441 | 46783645 | 1205 | 750  | 84   | 178.35  | 8.53  | 0    |
| chr17 | 46786865 | 46787918 | 1054 | 498  | 47   | 116.69  | 9.93  | 0.07 |
| chr17 | 46810658 | 46811692 | 1035 | 554  | 55   | 190.84  | 12.22 | 0    |
| chr17 | 46841249 | 46842443 | 1195 | 644  | 56   | 162.41  | 7.69  | 0.12 |
| chr17 | 46888138 | 46889651 | 1514 | 951  | 86   | 201.6   | 7.51  | 0    |
| chr17 | 46909454 | 46910812 | 1359 | 953  | 48   | 85.46   | 5.15  | 0.07 |
| chr17 | 46919010 | 46920148 | 1139 | 570  | 50   | 128.1   | 6.93  | 0.08 |
| chr17 | 46992091 | 46995666 | 3576 | 1689 | 211  | 921.17  | 14.09 | 0    |
| chr17 | 47025902 | 47028437 | 2536 | 575  | 122  | 234.67  | 6.34  | 0    |
| chr17 | 47146701 | 47148011 | 1311 | 810  | 51   | 97.57   | 6.33  | 0.08 |
| chr17 | 47276643 | 47278632 | 1990 | 280  | 83   | 202.22  | 6.07  | 0    |
| chr17 | 47747973 | 47749033 | 1061 | 579  | 53   | 127.4   | 8.41  | 0.07 |
| chr17 | 47765928 | 47766849 | 922  | 534  | 37   | 82.67   | 5.88  | 0.11 |
| chr17 | 47873542 | 47876127 | 2586 | 518  | 136  | 359.14  | 10.11 | 0    |
| chr17 | 47905106 | 47907246 | 2141 | 717  | 117  | 126.66  | 4.96  | 0.07 |
| chr17 | 48060964 | 48061930 | 967  | 642  | 38   | 72.4    | 5.39  | 0.15 |
| chr17 | 48426075 | 48426910 | 836  | 395  | 31   | 109.57  | 9.25  | 0.06 |
| chr17 | 48485353 | 48488634 | 3282 | 1197 | 180  | 209.78  | 5.06  | 0    |
| chr17 | 48494797 | 48495998 | 1202 | 420  | 55   | 155.46  | 7.28  | 0.11 |

|       |          |          |      |      |     |         |       |      |
|-------|----------|----------|------|------|-----|---------|-------|------|
| chr17 | 48547366 | 48550111 | 2746 | 1687 | 170 | 468.91  | 8.4   | 0    |
| chr17 | 49567417 | 49568182 | 766  | 309  | 42  | 127.99  | 7.74  | 0.08 |
| chr17 | 50328368 | 50330314 | 1947 | 527  | 83  | 183.43  | 6.25  | 0    |
| chr17 | 50647936 | 50649288 | 1353 | 723  | 63  | 186.87  | 10.48 | 0    |
| chr17 | 51317582 | 51319196 | 1615 | 1116 | 94  | 163.84  | 6.01  | 0.06 |
| chr17 | 53617683 | 53619332 | 1650 | 555  | 87  | 166.4   | 5.12  | 0.06 |
| chr17 | 56098138 | 56099241 | 1104 | 620  | 52  | 122.36  | 7.42  | 0.07 |
| chr17 | 56148535 | 56149607 | 1073 | 877  | 38  | 81.15   | 4.85  | 0.1  |
| chr17 | 56175421 | 56176717 | 1297 | 509  | 63  | 159.64  | 7.39  | 0.11 |
| chr17 | 56218104 | 56219371 | 1268 | 573  | 78  | 126.89  | 6.02  | 0.07 |
| chr17 | 56357906 | 56358762 | 857  | 446  | 28  | 75.7    | 8.09  | 0.13 |
| chr17 | 56415953 | 56416887 | 935  | 424  | 40  | 90.69   | 6.68  | 0.07 |
| chr17 | 56430185 | 56431399 | 1215 | 546  | 55  | 102.8   | 5.39  | 0.06 |
| chr17 | 56464582 | 56465724 | 1143 | 767  | 64  | 94.77   | 4.26  | 0.07 |
| chr17 | 56722611 | 56725096 | 2486 | 1926 | 126 | 245.12  | 6.07  | 0    |
| chr17 | 56748740 | 56749755 | 1016 | 523  | 43  | 84.42   | 6.47  | 0.06 |
| chr17 | 56752357 | 56753278 | 922  | 483  | 41  | 100.32  | 11.51 | 0.08 |
| chr17 | 56765829 | 56767165 | 1337 | 443  | 68  | 83.29   | 6.81  | 0.06 |
| chr17 | 56856190 | 56857670 | 1481 | 1121 | 81  | 70.89   | 3.79  | 0.16 |
| chr17 | 56903853 | 56904943 | 1091 | 561  | 58  | 87.4    | 6.07  | 0.07 |
| chr17 | 57129116 | 57130318 | 1203 | 664  | 63  | 100.95  | 6.42  | 0.08 |
| chr17 | 57170625 | 57171965 | 1341 | 891  | 77  | 111.25  | 4.77  | 0.06 |
| chr17 | 57199327 | 57200374 | 1048 | 614  | 41  | 92.82   | 4.62  | 0.07 |
| chr17 | 57244356 | 57245373 | 1018 | 473  | 38  | 81.59   | 5.78  | 0.1  |
| chr17 | 57418047 | 57419164 | 1118 | 543  | 65  | 112.21  | 8.09  | 0.06 |
| chr17 | 57497655 | 57500054 | 2400 | 1928 | 127 | 225.57  | 5.48  | 0    |
| chr17 | 64212689 | 64213696 | 1008 | 433  | 47  | 154.65  | 6.74  | 0.1  |
| chr17 | 64680921 | 64682112 | 1192 | 746  | 45  | 73.27   | 5.18  | 0.13 |
| chr17 | 64949514 | 64950719 | 1206 | 427  | 53  | 89.7    | 5.49  | 0.07 |
| chr17 | 64950792 | 64951789 | 998  | 507  | 38  | 73.61   | 5.28  | 0.13 |
| chr17 | 65962440 | 65963953 | 1514 | 598  | 86  | 191.78  | 6.68  | 0    |
| chr17 | 66121477 | 66122455 | 979  | 507  | 45  | 98.76   | 8.09  | 0.08 |
| chr17 | 66233490 | 66235993 | 2504 | 1802 | 110 | 248.72  | 5.89  | 0    |
| chr17 | 66450292 | 66451233 | 942  | 521  | 35  | 106.01  | 6.57  | 0.06 |
| chr17 | 66472483 | 66473534 | 1052 | 559  | 39  | 101.19  | 8.54  | 0.08 |
| chr17 | 69731837 | 69733988 | 2152 | 1600 | 77  | 215.69  | 8.04  | 0    |
| chr17 | 69766322 | 69767553 | 1232 | 638  | 54  | 197.92  | 8.09  | 0    |
| chr17 | 71096803 | 71097949 | 1147 | 737  | 40  | 99.24   | 6.01  | 0.08 |
| chr17 | 71181160 | 71182950 | 1791 | 1122 | 85  | 110.9   | 5.55  | 0.06 |
| chr17 | 71183214 | 71184615 | 1402 | 632  | 69  | 167.04  | 6.74  | 0.06 |
| chr17 | 71196725 | 71203995 | 7271 | 5433 | 433 | 1090.81 | 10.03 | 0    |
| chr17 | 71338888 | 71340811 | 1924 | 933  | 95  | 202.01  | 6.85  | 0    |
| chr17 | 71350802 | 71352197 | 1396 | 801  | 69  | 135.78  | 6.93  | 0.08 |
| chr17 | 71476479 | 71477548 | 1070 | 627  | 45  | 104.11  | 5.15  | 0.06 |

|       |          |          |      |      |     |        |       |      |
|-------|----------|----------|------|------|-----|--------|-------|------|
| chr17 | 71514100 | 71514899 | 800  | 316  | 30  | 76.88  | 6.39  | 0.12 |
| chr17 | 71824355 | 71825573 | 1219 | 407  | 57  | 174.35 | 8.94  | 0.07 |
| chr17 | 71834856 | 71835896 | 1041 | 491  | 42  | 116.37 | 7.91  | 0.07 |
| chr17 | 71875929 | 71876962 | 1034 | 583  | 47  | 193.5  | 13.4  | 0    |
| chr17 | 71947603 | 71948601 | 999  | 513  | 62  | 159.96 | 11.16 | 0.11 |
| chr17 | 73185112 | 73187381 | 2270 | 494  | 113 | 183.13 | 6     | 0    |
| chr17 | 73267175 | 73268196 | 1022 | 515  | 57  | 180.04 | 11.77 | 0    |
| chr17 | 74693884 | 74695255 | 1372 | 872  | 62  | 143.36 | 7.04  | 0.09 |
| chr17 | 74715343 | 74716398 | 1056 | 532  | 54  | 164.07 | 10.4  | 0.06 |
| chr17 | 74737574 | 74739035 | 1462 | 485  | 62  | 139.73 | 6.25  | 0.09 |
| chr17 | 74888130 | 74889411 | 1282 | 852  | 72  | 224.89 | 8.83  | 0    |
| chr17 | 74926895 | 74928739 | 1845 | 824  | 96  | 197.77 | 5.49  | 0    |
| chr17 | 78816883 | 78817812 | 930  | 521  | 34  | 77.24  | 6.47  | 0.12 |
| chr17 | 79135460 | 79136732 | 1273 | 452  | 73  | 211.68 | 7.42  | 0    |
| chr17 | 79234140 | 79235367 | 1228 | 476  | 47  | 88.74  | 4.92  | 0.07 |
| chr17 | 80014164 | 80015361 | 1198 | 717  | 58  | 183.92 | 8.09  | 0    |
| chr17 | 80294978 | 80295809 | 832  | 328  | 42  | 169.1  | 12.64 | 0.06 |
| chr17 | 80460456 | 80462365 | 1910 | 990  | 109 | 265.24 | 8.09  | 0    |
| chr17 | 80605517 | 80607446 | 1930 | 1138 | 129 | 376.47 | 14.38 | 0    |
| chr17 | 80689034 | 80689984 | 951  | 395  | 42  | 97.91  | 6.3   | 0.08 |
| chr17 | 81126540 | 81128047 | 1508 | 1014 | 60  | 157.27 | 7.91  | 0.11 |
| chr17 | 83477578 | 83478524 | 947  | 255  | 35  | 80.3   | 4.85  | 0.1  |
| chr17 | 84104969 | 84106566 | 1598 | 687  | 59  | 186.94 | 7.36  | 0    |
| chr17 | 84260533 | 84262097 | 1565 | 754  | 76  | 169.78 | 6.8   | 0.06 |
| chr17 | 84524831 | 84526195 | 1365 | 909  | 62  | 102.38 | 4.46  | 0.05 |
| chr17 | 84579868 | 84583456 | 3589 | 3215 | 266 | 857.33 | 11.19 | 0    |
| chr17 | 84583995 | 84586746 | 2752 | 2151 | 179 | 595.61 | 11.26 | 0    |
| chr17 | 84586791 | 84588496 | 1706 | 476  | 128 | 386.21 | 10.88 | 0    |
| chr17 | 85356274 | 85357845 | 1572 | 901  | 62  | 134.84 | 7.32  | 0.08 |
| chr17 | 85489048 | 85490563 | 1516 | 493  | 65  | 85.45  | 4.18  | 0.07 |
| chr17 | 86565952 | 86567205 | 1254 | 806  | 52  | 85.14  | 4.79  | 0.07 |
| chr17 | 87424396 | 87425435 | 1040 | 570  | 57  | 114.83 | 7.31  | 0.06 |
| chr17 | 87681165 | 87682847 | 1683 | 954  | 97  | 291.22 | 10.2  | 0    |
| chr17 | 87804737 | 87805636 | 900  | 411  | 34  | 121.89 | 12.23 | 0.07 |
| chr17 | 87845631 | 87847133 | 1503 | 575  | 119 | 449.12 | 17.15 | 0    |
| chr17 | 88464645 | 88466244 | 1600 | 1122 | 72  | 96.34  | 4.3   | 0.08 |
| chr17 | 95148586 | 95149793 | 1208 | 809  | 51  | 86.26  | 4.79  | 0.07 |
| chr18 | 3336553  | 3338107  | 1555 | 826  | 92  | 382.51 | 14.75 | 0    |
| chr18 | 3382766  | 3383592  | 827  | 326  | 30  | 100.47 | 8.36  | 0.08 |
| chr18 | 3507370  | 3508512  | 1143 | 451  | 49  | 75.89  | 5.58  | 0.14 |
| chr18 | 4352430  | 4353959  | 1530 | 574  | 84  | 188.48 | 6.65  | 0    |
| chr18 | 5333835  | 5335205  | 1371 | 628  | 63  | 75.08  | 4.62  | 0.13 |
| chr18 | 6135240  | 6137093  | 1854 | 1251 | 96  | 84.21  | 3.49  | 0.06 |
| chr18 | 6240906  | 6241960  | 1055 | 541  | 53  | 150.03 | 11.03 | 0.1  |

|       |          |          |      |      |     |        |       |      |
|-------|----------|----------|------|------|-----|--------|-------|------|
| chr18 | 6489685  | 6491254  | 1570 | 602  | 111 | 308.39 | 7.28  | 0    |
| chr18 | 6515885  | 6516756  | 872  | 411  | 37  | 120.28 | 9.04  | 0.07 |
| chr18 | 7868379  | 7869310  | 932  | 252  | 51  | 241.98 | 12.14 | 0    |
| chr18 | 9449344  | 9450594  | 1251 | 771  | 57  | 90.39  | 4.58  | 0.07 |
| chr18 | 9957644  | 9958689  | 1046 | 506  | 43  | 76.02  | 7.78  | 0.14 |
| chr18 | 10029323 | 10030279 | 957  | 671  | 44  | 96.48  | 5.81  | 0.08 |
| chr18 | 10181133 | 10182843 | 1711 | 942  | 81  | 146.91 | 6.36  | 0.09 |
| chr18 | 10609531 | 10610549 | 1019 | 521  | 43  | 70.32  | 5.78  | 0.16 |
| chr18 | 10725006 | 10726158 | 1153 | 652  | 50  | 93.9   | 6.22  | 0.07 |
| chr18 | 11815827 | 11816614 | 788  | 386  | 32  | 78.67  | 6.47  | 0.12 |
| chr18 | 12286817 | 12287963 | 1147 | 287  | 44  | 102.56 | 6.07  | 0.06 |
| chr18 | 12394457 | 12395625 | 1169 | 411  | 63  | 134.78 | 6.14  | 0.08 |
| chr18 | 12801606 | 12802699 | 1094 | 701  | 46  | 133.12 | 7.96  | 0.08 |
| chr18 | 13130259 | 13131069 | 811  | 613  | 37  | 109.05 | 6.07  | 0.06 |
| chr18 | 14840746 | 14841693 | 948  | 459  | 35  | 85.76  | 8.94  | 0.07 |
| chr18 | 20902836 | 20905235 | 2400 | 1967 | 97  | 227.53 | 7.77  | 0    |
| chr18 | 21054326 | 21055545 | 1220 | 543  | 56  | 112.82 | 5.91  | 0.06 |
| chr18 | 23961563 | 23962963 | 1401 | 727  | 74  | 82.77  | 4.14  | 0.11 |
| chr18 | 24178415 | 24179428 | 1014 | 401  | 40  | 91.89  | 5.78  | 0.07 |
| chr18 | 24279781 | 24280880 | 1100 | 245  | 51  | 99.81  | 5.09  | 0.08 |
| chr18 | 24628767 | 24629755 | 989  | 629  | 44  | 178.78 | 11.65 | 0    |
| chr18 | 24811437 | 24812933 | 1497 | 950  | 67  | 111.04 | 5.3   | 0.06 |
| chr18 | 31793496 | 31795222 | 1727 | 1087 | 83  | 110.21 | 5     | 0.06 |
| chr18 | 31963274 | 31964415 | 1142 | 475  | 55  | 168.02 | 9.37  | 0.06 |
| chr18 | 32069861 | 32071446 | 1586 | 499  | 73  | 108.41 | 5.24  | 0.06 |
| chr18 | 32226951 | 32228233 | 1283 | 524  | 70  | 201.97 | 10.2  | 0    |
| chr18 | 32322221 | 32323340 | 1120 | 526  | 52  | 126.92 | 7.04  | 0.07 |
| chr18 | 32399359 | 32400455 | 1097 | 539  | 59  | 178.6  | 11.4  | 0    |
| chr18 | 32536424 | 32537450 | 1027 | 495  | 44  | 73.5   | 6.36  | 0.13 |
| chr18 | 33954205 | 33955119 | 915  | 433  | 38  | 73.99  | 7.12  | 0.13 |
| chr18 | 34380095 | 34381071 | 977  | 512  | 49  | 213.42 | 12.45 | 0    |
| chr18 | 34490211 | 34491413 | 1203 | 578  | 67  | 180.26 | 9.39  | 0    |
| chr18 | 34568608 | 34569549 | 942  | 491  | 40  | 79.81  | 8.09  | 0.1  |
| chr18 | 34665122 | 34667098 | 1977 | 1495 | 86  | 152.56 | 8.09  | 0.1  |
| chr18 | 34783357 | 34785028 | 1672 | 512  | 73  | 193.37 | 6.97  | 0    |
| chr18 | 34917961 | 34919806 | 1846 | 1293 | 104 | 206.17 | 7.57  | 0    |
| chr18 | 34936061 | 34937882 | 1822 | 485  | 99  | 195.99 | 8.63  | 0    |
| chr18 | 35019215 | 35020672 | 1458 | 349  | 51  | 91.92  | 6.4   | 0.07 |
| chr18 | 35091086 | 35092442 | 1357 | 550  | 84  | 240.17 | 7.78  | 0    |
| chr18 | 35277917 | 35279393 | 1477 | 1033 | 67  | 241.92 | 7.83  | 0    |
| chr18 | 35658145 | 35659003 | 859  | 366  | 36  | 96.47  | 8.09  | 0.08 |
| chr18 | 35721452 | 35722773 | 1322 | 813  | 84  | 269.97 | 8.76  | 0    |
| chr18 | 35930525 | 35931549 | 1025 | 507  | 44  | 111.31 | 8.86  | 0.06 |
| chr18 | 36101270 | 36102642 | 1373 | 753  | 61  | 111.36 | 5.6   | 0.06 |

|       |          |          |      |      |     |        |       |      |
|-------|----------|----------|------|------|-----|--------|-------|------|
| chr18 | 36177658 | 36178590 | 933  | 432  | 44  | 147.49 | 11.69 | 0.1  |
| chr18 | 36439863 | 36441175 | 1313 | 639  | 82  | 237.23 | 11.2  | 0    |
| chr18 | 36445742 | 36447491 | 1750 | 896  | 72  | 158.31 | 5.88  | 0.11 |
| chr18 | 36718911 | 36720670 | 1760 | 1337 | 86  | 99.31  | 4.37  | 0.08 |
| chr18 | 36829487 | 36830402 | 916  | 472  | 45  | 102.5  | 7.16  | 0.06 |
| chr18 | 36884161 | 36886679 | 2519 | 1790 | 144 | 299.68 | 5.93  | 0    |
| chr18 | 36953049 | 36954061 | 1013 | 460  | 47  | 103.88 | 6.15  | 0.06 |
| chr18 | 36960811 | 36962065 | 1255 | 805  | 60  | 130.65 | 6.66  | 0.08 |
| chr18 | 38114230 | 38115187 | 958  | 355  | 38  | 107.27 | 7.19  | 0.06 |
| chr18 | 38129169 | 38130052 | 884  | 417  | 31  | 83.4   | 6.19  | 0.06 |
| chr18 | 38409350 | 38410623 | 1274 | 494  | 60  | 105.53 | 5.86  | 0.06 |
| chr18 | 38455893 | 38456858 | 966  | 392  | 42  | 91.19  | 7.42  | 0.07 |
| chr18 | 38497707 | 38499293 | 1587 | 1031 | 69  | 125.04 | 6.85  | 0.07 |
| chr18 | 38578528 | 38579232 | 705  | 523  | 25  | 74.24  | 6.45  | 0.13 |
| chr18 | 39648788 | 39651663 | 2876 | 504  | 140 | 437.38 | 7.9   | 0    |
| chr18 | 42434538 | 42435462 | 925  | 557  | 36  | 77.45  | 5.15  | 0.12 |
| chr18 | 42670560 | 42671572 | 1013 | 310  | 43  | 84.79  | 5.18  | 0.06 |
| chr18 | 46358206 | 46359036 | 831  | 490  | 43  | 197.76 | 11.56 | 0    |
| chr18 | 46439792 | 46440709 | 918  | 368  | 37  | 94.14  | 6.07  | 0.07 |
| chr18 | 46683807 | 46686385 | 2579 | 2088 | 143 | 438.76 | 9.86  | 0    |
| chr18 | 47118009 | 47119100 | 1092 | 432  | 46  | 106.35 | 5.52  | 0.06 |
| chr18 | 49914787 | 49915970 | 1184 | 670  | 59  | 92.2   | 5.88  | 0.07 |
| chr18 | 49991810 | 49992921 | 1112 | 583  | 55  | 111.14 | 6.36  | 0.06 |
| chr18 | 50138570 | 50139526 | 957  | 522  | 32  | 75.05  | 7.19  | 0.13 |
| chr18 | 50212640 | 50214112 | 1473 | 556  | 73  | 115.98 | 5.56  | 0.07 |
| chr18 | 53335598 | 53336630 | 1033 | 455  | 45  | 130.23 | 10.22 | 0.08 |
| chr18 | 53404746 | 53405946 | 1201 | 937  | 38  | 79.86  | 4.54  | 0.1  |
| chr18 | 53903821 | 53905343 | 1523 | 566  | 63  | 109.07 | 6.47  | 0.06 |
| chr18 | 54021263 | 54022317 | 1055 | 472  | 59  | 243.47 | 12.6  | 0    |
| chr18 | 57084743 | 57085623 | 881  | 442  | 44  | 102.76 | 7.16  | 0.06 |
| chr18 | 57134371 | 57135326 | 956  | 547  | 40  | 155.16 | 11.07 | 0.1  |
| chr18 | 60660221 | 60661684 | 1464 | 808  | 58  | 136.5  | 5.26  | 0.08 |
| chr18 | 60719967 | 60721171 | 1205 | 461  | 51  | 110.25 | 6.68  | 0.06 |
| chr18 | 60933610 | 60934892 | 1283 | 563  | 68  | 121.58 | 6.57  | 0.07 |
| chr18 | 61264952 | 61269152 | 4201 | 3323 | 384 | 871.01 | 8.09  | 0    |
| chr18 | 61290688 | 61293099 | 2412 | 1130 | 146 | 328.82 | 9.17  | 0    |
| chr18 | 61370247 | 61371771 | 1525 | 1026 | 81  | 157.64 | 6.74  | 0.11 |
| chr18 | 61714240 | 61715962 | 1723 | 687  | 93  | 174.37 | 6.26  | 0.07 |
| chr18 | 61885504 | 61886498 | 995  | 616  | 59  | 101.8  | 4.59  | 0.05 |
| chr18 | 62707873 | 62708974 | 1102 | 474  | 63  | 234.64 | 11.92 | 0    |
| chr18 | 63851579 | 63852640 | 1062 | 534  | 53  | 108.99 | 6.65  | 0.06 |
| chr18 | 64648064 | 64649098 | 1035 | 502  | 41  | 73.31  | 6.47  | 0.13 |
| chr18 | 64675749 | 64676944 | 1196 | 494  | 63  | 151.42 | 7.16  | 0.1  |
| chr18 | 65047223 | 65047986 | 764  | 366  | 25  | 80.99  | 7.57  | 0.1  |

|       |          |          |      |      |     |        |       |      |
|-------|----------|----------|------|------|-----|--------|-------|------|
| chr18 | 65589690 | 65591160 | 1471 | 613  | 77  | 126.63 | 5.88  | 0.07 |
| chr18 | 67364520 | 67365643 | 1124 | 575  | 65  | 116.37 | 8.32  | 0.07 |
| chr18 | 67404499 | 67405816 | 1318 | 784  | 60  | 167.21 | 7.69  | 0.06 |
| chr18 | 67550080 | 67550858 | 779  | 326  | 28  | 74.69  | 9.09  | 0.13 |
| chr18 | 67608305 | 67609401 | 1097 | 536  | 53  | 121.92 | 5.83  | 0.07 |
| chr18 | 67800682 | 67801784 | 1103 | 398  | 44  | 154.88 | 9.48  | 0.1  |
| chr18 | 67883516 | 67884728 | 1213 | 511  | 61  | 153.53 | 7.42  | 0.1  |
| chr18 | 67933994 | 67935297 | 1304 | 920  | 67  | 132.02 | 5.55  | 0.08 |
| chr18 | 68093160 | 68093943 | 784  | 483  | 27  | 84.86  | 7.57  | 0.06 |
| chr18 | 69503604 | 69504590 | 987  | 415  | 57  | 178.19 | 9.85  | 0    |
| chr18 | 69752440 | 69753670 | 1231 | 548  | 62  | 164.51 | 10.2  | 0.06 |
| chr18 | 70689403 | 70690440 | 1038 | 562  | 45  | 129.52 | 8.94  | 0.08 |
| chr18 | 70727503 | 70729109 | 1607 | 1075 | 73  | 279.62 | 15.07 | 0    |
| chr18 | 70739878 | 70740751 | 874  | 475  | 39  | 160.76 | 15.73 | 0.11 |
| chr18 | 70752517 | 70753273 | 757  | 382  | 36  | 158.08 | 15.15 | 0.11 |
| chr18 | 70777187 | 70778089 | 903  | 372  | 42  | 149.54 | 14.93 | 0.1  |
| chr18 | 70781759 | 70782680 | 922  | 537  | 36  | 82.9   | 9.63  | 0.11 |
| chr18 | 70784939 | 70785904 | 966  | 469  | 65  | 279.71 | 16.18 | 0    |
| chr18 | 73731226 | 73732794 | 1569 | 738  | 87  | 207.06 | 7.19  | 0    |
| chr18 | 73732886 | 73733694 | 809  | 323  | 29  | 74.57  | 8.89  | 0.13 |
| chr18 | 73863054 | 73864104 | 1051 | 408  | 49  | 135.32 | 9.25  | 0.08 |
| chr18 | 74375161 | 74376425 | 1265 | 633  | 52  | 89.29  | 4.67  | 0.07 |
| chr18 | 74937960 | 74939397 | 1438 | 436  | 65  | 141.23 | 5.73  | 0.09 |
| chr18 | 75164848 | 75165897 | 1050 | 563  | 50  | 157.91 | 11.5  | 0.11 |
| chr18 | 75525902 | 75527988 | 2087 | 540  | 101 | 326.45 | 8.09  | 0    |
| chr18 | 77167936 | 77169333 | 1398 | 863  | 68  | 162.34 | 8.09  | 0.11 |
| chr18 | 77303269 | 77304333 | 1065 | 418  | 56  | 123.14 | 7.8   | 0.07 |
| chr18 | 77952434 | 77952961 | 528  | 344  | 19  | 71.24  | 8.74  | 0.15 |
| chr18 | 78011965 | 78013496 | 1532 | 766  | 68  | 89.32  | 3.79  | 0.07 |
| chr18 | 78134771 | 78136138 | 1368 | 371  | 61  | 109.95 | 6.59  | 0.06 |
| chr18 | 80347396 | 80348916 | 1521 | 266  | 77  | 278.6  | 12.3  | 0    |
| chr18 | 80365834 | 80367291 | 1458 | 968  | 66  | 161.12 | 9.19  | 0.11 |
| chr18 | 80397018 | 80397883 | 866  | 311  | 31  | 79.75  | 5.39  | 0.1  |
| chr18 | 80403144 | 80404265 | 1122 | 477  | 62  | 174.6  | 8.76  | 0.07 |
| chr18 | 80452030 | 80453529 | 1500 | 998  | 68  | 110.67 | 6.42  | 0.06 |
| chr18 | 80665909 | 80667470 | 1562 | 924  | 86  | 144.72 | 5     | 0.09 |
| chr18 | 80904344 | 80905410 | 1067 | 671  | 40  | 82.9   | 4.52  | 0.11 |
| chr18 | 82860581 | 82863111 | 2531 | 1154 | 116 | 325.09 | 9.81  | 0    |
| chr18 | 83079036 | 83081591 | 2556 | 1431 | 113 | 312.85 | 6.89  | 0    |
| chr18 | 83082269 | 83083741 | 1473 | 422  | 63  | 143.39 | 6.62  | 0.09 |
| chr18 | 84256514 | 84258101 | 1588 | 1005 | 80  | 289.05 | 9.52  | 0    |
| chr18 | 84758697 | 84759968 | 1272 | 573  | 60  | 124.73 | 5.91  | 0.07 |
| chr18 | 85119915 | 85121768 | 1854 | 959  | 101 | 220.65 | 6.06  | 0    |
| chr19 | 3282434  | 3283477  | 1044 | 580  | 41  | 77.06  | 6.07  | 0.12 |

|       |         |         |      |      |     |        |       |      |
|-------|---------|---------|------|------|-----|--------|-------|------|
| chr19 | 3324637 | 3325726 | 1090 | 746  | 46  | 94.52  | 5.39  | 0.07 |
| chr19 | 3388445 | 3389459 | 1015 | 468  | 49  | 133.47 | 9.93  | 0.08 |
| chr19 | 3575099 | 3576209 | 1111 | 483  | 58  | 170.09 | 9.56  | 0.06 |
| chr19 | 3766998 | 3769510 | 2513 | 846  | 153 | 276.82 | 6.24  | 0    |
| chr19 | 3851323 | 3852374 | 1052 | 508  | 47  | 78.55  | 5.86  | 0.12 |
| chr19 | 3892588 | 3893952 | 1365 | 519  | 59  | 95.72  | 4.05  | 0.08 |
| chr19 | 3904664 | 3908646 | 3983 | 2418 | 223 | 254.29 | 5.72  | 0    |
| chr19 | 3912045 | 3914079 | 2035 | 566  | 134 | 166.82 | 5.51  | 0.06 |
| chr19 | 3934851 | 3936900 | 2050 | 1585 | 133 | 176.16 | 4.15  | 0.07 |
| chr19 | 3999861 | 4001048 | 1188 | 852  | 49  | 94.12  | 5.63  | 0.07 |
| chr19 | 4012029 | 4013203 | 1175 | 634  | 74  | 120.71 | 5.66  | 0.07 |
| chr19 | 4096570 | 4097943 | 1374 | 504  | 77  | 87.75  | 4.14  | 0.07 |
| chr19 | 4099609 | 4100659 | 1051 | 460  | 46  | 70.36  | 5.12  | 0.16 |
| chr19 | 4125564 | 4126631 | 1068 | 550  | 43  | 105.68 | 6.81  | 0.06 |
| chr19 | 4147314 | 4149253 | 1940 | 1378 | 101 | 242.25 | 10.03 | 0    |
| chr19 | 4169138 | 4170310 | 1173 | 529  | 77  | 113.93 | 6.99  | 0.06 |
| chr19 | 4191407 | 4192803 | 1397 | 915  | 79  | 185.33 | 7.22  | 0    |
| chr19 | 4231453 | 4232681 | 1229 | 861  | 49  | 91.73  | 4.72  | 0.07 |
| chr19 | 4268292 | 4269454 | 1163 | 765  | 51  | 109.17 | 5.73  | 0.06 |
| chr19 | 4282526 | 4284771 | 2246 | 789  | 124 | 317.69 | 10.71 | 0    |
| chr19 | 4300012 | 4301181 | 1170 | 492  | 56  | 119.78 | 7.47  | 0.07 |
| chr19 | 4303953 | 4304865 | 913  | 470  | 34  | 73.62  | 6.9   | 0.13 |
| chr19 | 4333356 | 4334338 | 983  | 584  | 45  | 83.23  | 6.36  | 0.06 |
| chr19 | 4395979 | 4398149 | 2171 | 1577 | 120 | 292.56 | 6.85  | 0    |
| chr19 | 4625102 | 4626364 | 1263 | 533  | 72  | 118.94 | 5.39  | 0.07 |
| chr19 | 4755518 | 4757086 | 1569 | 1048 | 86  | 192.18 | 8.67  | 0    |
| chr19 | 4810548 | 4812415 | 1868 | 1332 | 97  | 189.09 | 6.97  | 0    |
| chr19 | 4878255 | 4879331 | 1077 | 674  | 48  | 89.24  | 5.39  | 0.07 |
| chr19 | 4927669 | 4928942 | 1274 | 797  | 59  | 126.55 | 6.8   | 0.07 |
| chr19 | 4942844 | 4943408 | 565  | 192  | 20  | 72.51  | 9.25  | 0.15 |
| chr19 | 4961835 | 4962682 | 848  | 534  | 49  | 99.13  | 5.15  | 0.08 |
| chr19 | 5038219 | 5039456 | 1238 | 688  | 54  | 120.85 | 5.63  | 0.07 |
| chr19 | 5040917 | 5041908 | 992  | 535  | 43  | 117.18 | 10.11 | 0.07 |
| chr19 | 5106484 | 5107585 | 1102 | 531  | 60  | 144.03 | 7.79  | 0.09 |
| chr19 | 5272533 | 5273508 | 976  | 497  | 39  | 103.8  | 6.81  | 0.06 |
| chr19 | 5388129 | 5389892 | 1764 | 529  | 87  | 231.17 | 11.03 | 0    |
| chr19 | 5460062 | 5461144 | 1083 | 525  | 54  | 116.51 | 8.09  | 0.07 |
| chr19 | 5488922 | 5489765 | 844  | 259  | 41  | 88.49  | 5.39  | 0.07 |
| chr19 | 5489931 | 5492046 | 2116 | 1576 | 123 | 165.6  | 4.25  | 0.06 |
| chr19 | 5567040 | 5569211 | 2172 | 1132 | 107 | 201.62 | 5.78  | 0    |
| chr19 | 5571603 | 5573508 | 1906 | 1485 | 78  | 104.01 | 4.18  | 0.06 |
| chr19 | 5609400 | 5610911 | 1512 | 583  | 84  | 143.77 | 5.95  | 0.09 |
| chr19 | 5636864 | 5638320 | 1457 | 600  | 85  | 304.32 | 11.85 | 0    |
| chr19 | 5660688 | 5661974 | 1287 | 804  | 59  | 132.02 | 6.07  | 0.08 |

|       |         |         |       |       |      |         |       |      |
|-------|---------|---------|-------|-------|------|---------|-------|------|
| chr19 | 5663077 | 5664193 | 1117  | 582   | 55   | 76.55   | 6.7   | 0.12 |
| chr19 | 5688120 | 5690475 | 2356  | 657   | 120  | 223.7   | 5.86  | 0    |
| chr19 | 5691660 | 5693278 | 1619  | 595   | 70   | 154.29  | 6.09  | 0.1  |
| chr19 | 5724146 | 5726741 | 2596  | 744   | 144  | 348.47  | 8.69  | 0    |
| chr19 | 5741566 | 5742474 | 909   | 492   | 32   | 86.66   | 6.7   | 0.07 |
| chr19 | 5770749 | 5771833 | 1085  | 666   | 51   | 177.96  | 9.52  | 0.07 |
| chr19 | 5795866 | 5804143 | 8278  | 6768  | 609  | 1711.04 | 21.67 | 0    |
| chr19 | 5810029 | 5811015 | 987   | 416   | 44   | 87.72   | 6.22  | 0.07 |
| chr19 | 5825762 | 5827315 | 1554  | 607   | 63   | 117.16  | 4.72  | 0.07 |
| chr19 | 5827334 | 5829084 | 1751  | 1559  | 67   | 130.34  | 4.38  | 0.08 |
| chr19 | 5831480 | 5832597 | 1118  | 632   | 49   | 115.65  | 6.14  | 0.06 |
| chr19 | 5832625 | 5834354 | 1730  | 416   | 71   | 141.55  | 4.92  | 0.09 |
| chr19 | 5834944 | 5850846 | 15903 | 10523 | 1493 | 2976.63 | 16.98 | 0    |
| chr19 | 6014659 | 6016095 | 1437  | 540   | 56   | 111.37  | 5.45  | 0.06 |
| chr19 | 6046328 | 6048143 | 1816  | 684   | 80   | 215.77  | 9.53  | 0    |
| chr19 | 6057295 | 6058392 | 1098  | 517   | 54   | 71.34   | 5.84  | 0.15 |
| chr19 | 6060942 | 6062242 | 1301  | 316   | 60   | 151.34  | 8.09  | 0.1  |
| chr19 | 6076639 | 6077681 | 1043  | 617   | 49   | 109.58  | 7.44  | 0.06 |
| chr19 | 6084371 | 6085374 | 1004  | 571   | 74   | 313.52  | 16.18 | 0    |
| chr19 | 6117516 | 6118786 | 1271  | 992   | 55   | 134.98  | 5.71  | 0.08 |
| chr19 | 6127611 | 6128562 | 952   | 598   | 43   | 146.57  | 9.99  | 0.09 |
| chr19 | 6140239 | 6141521 | 1283  | 670   | 58   | 101.5   | 5.78  | 0.08 |
| chr19 | 6235509 | 6236744 | 1236  | 451   | 64   | 151.03  | 7.19  | 0.1  |
| chr19 | 6241125 | 6242165 | 1041  | 637   | 44   | 128.74  | 6.19  | 0.08 |
| chr19 | 6362899 | 6365171 | 2273  | 590   | 133  | 249.93  | 6.13  | 0    |
| chr19 | 6932213 | 6933242 | 1030  | 512   | 38   | 91.25   | 7.2   | 0.07 |
| chr19 | 6983597 | 6985004 | 1408  | 448   | 77   | 135.98  | 5.64  | 0.08 |
| chr19 | 6995237 | 6997199 | 1963  | 1086  | 98   | 82.89   | 3.95  | 0.11 |
| chr19 | 7015385 | 7017428 | 2044  | 1695  | 123  | 277.35  | 6.2   | 0    |
| chr19 | 7025017 | 7026666 | 1650  | 998   | 74   | 131.71  | 4.79  | 0.08 |
| chr19 | 7053629 | 7055572 | 1944  | 1036  | 142  | 347.86  | 7.61  | 0    |
| chr19 | 7061469 | 7062435 | 967   | 563   | 34   | 88.53   | 6.55  | 0.07 |
| chr19 | 7066558 | 7067566 | 1009  | 452   | 43   | 108.12  | 8.09  | 0.06 |
| chr19 | 7092074 | 7095334 | 3261  | 2749  | 153  | 244.01  | 5     | 0    |
| chr19 | 7113840 | 7115688 | 1849  | 830   | 104  | 196.09  | 6.32  | 0    |
| chr19 | 7279923 | 7281280 | 1358  | 819   | 60   | 193.74  | 10.47 | 0    |
| chr19 | 7315179 | 7316051 | 873   | 565   | 38   | 99.73   | 6.55  | 0.08 |
| chr19 | 7415572 | 7416833 | 1262  | 448   | 62   | 143.4   | 5.83  | 0.09 |
| chr19 | 7557178 | 7558220 | 1043  | 504   | 54   | 175.23  | 12.14 | 0.07 |
| chr19 | 7568161 | 7569681 | 1521  | 967   | 79   | 192.28  | 6.47  | 0    |
| chr19 | 8787049 | 8788852 | 1804  | 1251  | 97   | 147.59  | 5.55  | 0.1  |
| chr19 | 8809836 | 8810975 | 1140  | 482   | 69   | 149.92  | 9.1   | 0.1  |
| chr19 | 8830883 | 8832076 | 1194  | 659   | 65   | 230.38  | 9.37  | 0    |
| chr19 | 8845220 | 8846318 | 1099  | 748   | 44   | 108.29  | 5.66  | 0.06 |

|       |          |          |      |      |     |         |       |      |
|-------|----------|----------|------|------|-----|---------|-------|------|
| chr19 | 8848328  | 8849713  | 1386 | 790  | 84  | 224.09  | 8.09  | 0    |
| chr19 | 8860312  | 8861160  | 849  | 638  | 40  | 72.92   | 5.22  | 0.15 |
| chr19 | 8893110  | 8895393  | 2284 | 1289 | 138 | 248.19  | 7.17  | 0    |
| chr19 | 8911436  | 8912444  | 1009 | 569  | 49  | 141.87  | 7.71  | 0.09 |
| chr19 | 8945681  | 8946630  | 950  | 385  | 36  | 79.61   | 5.01  | 0.1  |
| chr19 | 8954821  | 8955827  | 1007 | 615  | 39  | 106.68  | 4.94  | 0.06 |
| chr19 | 8994447  | 8995352  | 906  | 265  | 44  | 98.98   | 5.91  | 0.08 |
| chr19 | 9003652  | 9004641  | 990  | 421  | 42  | 93.48   | 6.68  | 0.07 |
| chr19 | 9016011  | 9017674  | 1664 | 550  | 81  | 153.36  | 5.2   | 0.1  |
| chr19 | 9041024  | 9042038  | 1015 | 566  | 47  | 83.23   | 5.3   | 0.06 |
| chr19 | 9056610  | 9058406  | 1797 | 1363 | 71  | 117.09  | 4.85  | 0.07 |
| chr19 | 9063540  | 9065608  | 2069 | 843  | 96  | 175.26  | 4.78  | 0.07 |
| chr19 | 9066977  | 9068043  | 1067 | 499  | 48  | 72.22   | 5.22  | 0.15 |
| chr19 | 9973243  | 9974752  | 1510 | 552  | 80  | 189.69  | 5.6   | 0    |
| chr19 | 10028246 | 10030085 | 1840 | 1299 | 88  | 214.76  | 6.73  | 0    |
| chr19 | 10056097 | 10062435 | 6339 | 1205 | 805 | 2100.45 | 9.14  | 0    |
| chr19 | 10096646 | 10098675 | 2030 | 423  | 88  | 106.76  | 3.79  | 0.06 |
| chr19 | 10115396 | 10116674 | 1279 | 622  | 62  | 190.35  | 7.05  | 0    |
| chr19 | 10278124 | 10279654 | 1531 | 609  | 59  | 89.27   | 5.29  | 0.07 |
| chr19 | 10599176 | 10600808 | 1633 | 926  | 92  | 300.9   | 9.71  | 0    |
| chr19 | 10677043 | 10677884 | 842  | 374  | 30  | 72.54   | 6.42  | 0.15 |
| chr19 | 10679567 | 10680678 | 1112 | 569  | 48  | 75.47   | 6.14  | 0.13 |
| chr19 | 10762813 | 10764004 | 1192 | 505  | 55  | 111.89  | 6.22  | 0.06 |
| chr19 | 10915621 | 10918538 | 2918 | 1329 | 122 | 124.6   | 4.67  | 0.07 |
| chr19 | 10933579 | 10935946 | 2368 | 1215 | 111 | 257.26  | 6.68  | 0    |
| chr19 | 11023391 | 11024286 | 896  | 391  | 42  | 125.6   | 10.52 | 0.07 |
| chr19 | 11394391 | 11396508 | 2118 | 1465 | 88  | 196.02  | 7.24  | 0    |
| chr19 | 11409059 | 11411069 | 2011 | 1523 | 114 | 216.09  | 8.09  | 0    |
| chr19 | 11844416 | 11845415 | 1000 | 400  | 37  | 99.83   | 5.09  | 0.08 |
| chr19 | 11986051 | 11987593 | 1543 | 513  | 72  | 129.18  | 6.65  | 0.08 |
| chr19 | 12039134 | 12040619 | 1486 | 575  | 72  | 110.2   | 4.3   | 0.06 |
| chr19 | 12084605 | 12087250 | 2646 | 978  | 108 | 177.36  | 7.16  | 0.07 |
| chr19 | 12508566 | 12510253 | 1688 | 567  | 75  | 166.48  | 4.92  | 0.06 |
| chr19 | 12535108 | 12536127 | 1020 | 573  | 39  | 88.5    | 5.5   | 0.07 |
| chr19 | 12536380 | 12539519 | 3140 | 2545 | 183 | 527.78  | 9.98  | 0    |
| chr19 | 12868870 | 12869849 | 980  | 491  | 44  | 74.93   | 6.97  | 0.13 |
| chr19 | 14671139 | 14672141 | 1003 | 568  | 38  | 130.94  | 8.49  | 0.08 |
| chr19 | 14672152 | 14673647 | 1496 | 408  | 59  | 150.03  | 6.92  | 0.1  |
| chr19 | 15889411 | 15890292 | 882  | 476  | 31  | 89.78   | 6.57  | 0.07 |
| chr19 | 16089681 | 16090608 | 928  | 659  | 38  | 109.05  | 7.07  | 0.06 |
| chr19 | 16206550 | 16207381 | 832  | 360  | 34  | 112.25  | 7.45  | 0.06 |
| chr19 | 16207929 | 16208887 | 959  | 432  | 34  | 79.4    | 6.39  | 0.1  |
| chr19 | 18704894 | 18706850 | 1957 | 1227 | 91  | 158.71  | 6.07  | 0.11 |
| chr19 | 18787146 | 18787776 | 631  | 367  | 25  | 97.14   | 10.4  | 0.08 |

|       |          |          |      |      |     |        |       |      |
|-------|----------|----------|------|------|-----|--------|-------|------|
| chr19 | 20464633 | 20465534 | 902  | 448  | 34  | 80.45  | 7.28  | 0.1  |
| chr19 | 21345922 | 21347882 | 1961 | 879  | 122 | 431.39 | 20.42 | 0    |
| chr19 | 23209198 | 23210933 | 1736 | 472  | 84  | 258.96 | 8.52  | 0    |
| chr19 | 23214972 | 23216676 | 1705 | 738  | 65  | 110.24 | 4.53  | 0.06 |
| chr19 | 23761321 | 23762197 | 877  | 425  | 33  | 95.5   | 5.24  | 0.08 |
| chr19 | 24248351 | 24249226 | 876  | 415  | 30  | 94.63  | 8.37  | 0.07 |
| chr19 | 24551330 | 24552796 | 1467 | 815  | 82  | 238.33 | 8.38  | 0    |
| chr19 | 25035560 | 25036545 | 986  | 532  | 59  | 107.86 | 8.32  | 0.06 |
| chr19 | 26680580 | 26682261 | 1682 | 376  | 75  | 124.5  | 5.49  | 0.07 |
| chr19 | 27504019 | 27505194 | 1176 | 692  | 50  | 85.79  | 5.09  | 0.07 |
| chr19 | 28085644 | 28086630 | 987  | 441  | 40  | 122.6  | 8.57  | 0.07 |
| chr19 | 29064387 | 29065324 | 938  | 504  | 39  | 75.74  | 8.09  | 0.13 |
| chr19 | 29121828 | 29122584 | 757  | 321  | 26  | 75.51  | 7.08  | 0.13 |
| chr19 | 29325444 | 29327015 | 1572 | 455  | 62  | 156.04 | 7.32  | 0.11 |
| chr19 | 29562287 | 29563403 | 1117 | 371  | 59  | 83.46  | 5.25  | 0.06 |
| chr19 | 29722303 | 29723090 | 788  | 331  | 31  | 101.56 | 7.59  | 0.08 |
| chr19 | 29880620 | 29881712 | 1093 | 505  | 71  | 281.6  | 17.4  | 0    |
| chr19 | 29887194 | 29888037 | 844  | 405  | 34  | 82.32  | 6.55  | 0.11 |
| chr19 | 30104275 | 30105826 | 1552 | 799  | 83  | 269.77 | 9.71  | 0    |
| chr19 | 31156606 | 31157756 | 1151 | 546  | 51  | 110.76 | 6.41  | 0.06 |
| chr19 | 32462257 | 32464506 | 2250 | 1606 | 110 | 301.39 | 7.32  | 0    |
| chr19 | 32830266 | 32831313 | 1048 | 525  | 42  | 71.57  | 5.29  | 0.15 |
| chr19 | 32831509 | 32832574 | 1066 | 634  | 41  | 96.82  | 6.07  | 0.08 |
| chr19 | 33465870 | 33467043 | 1174 | 361  | 49  | 111    | 6.99  | 0.06 |
| chr19 | 34266790 | 34267980 | 1191 | 875  | 54  | 170.22 | 7.19  | 0.06 |
| chr19 | 34589763 | 34590917 | 1155 | 577  | 56  | 75.52  | 5.55  | 0.13 |
| chr19 | 34595749 | 34596870 | 1122 | 929  | 47  | 89.67  | 4.53  | 0.07 |
| chr19 | 34598704 | 34599746 | 1043 | 646  | 48  | 130.84 | 6.55  | 0.08 |
| chr19 | 34600813 | 34602428 | 1616 | 1118 | 73  | 98.22  | 5.82  | 0.08 |
| chr19 | 36907943 | 36909072 | 1130 | 567  | 48  | 98.98  | 5.06  | 0.08 |
| chr19 | 36999768 | 37001137 | 1370 | 837  | 75  | 177.62 | 7.19  | 0.07 |
| chr19 | 37249109 | 37250164 | 1056 | 533  | 47  | 98.01  | 5.5   | 0.08 |
| chr19 | 37280780 | 37282541 | 1762 | 1183 | 69  | 151.92 | 7.71  | 0.1  |
| chr19 | 37449617 | 37451322 | 1706 | 1153 | 78  | 94.64  | 4.05  | 0.07 |
| chr19 | 37508631 | 37511775 | 3145 | 763  | 177 | 680.37 | 13.19 | 0    |
| chr19 | 37569612 | 37570561 | 950  | 460  | 37  | 84.55  | 6.93  | 0.06 |
| chr19 | 38128740 | 38129814 | 1075 | 552  | 48  | 106.16 | 5.73  | 0.06 |
| chr19 | 40703409 | 40704054 | 646  | 299  | 22  | 70.12  | 9.17  | 0.16 |
| chr19 | 40968589 | 40970328 | 1740 | 564  | 95  | 329.8  | 10.65 | 0    |
| chr19 | 41067732 | 41069164 | 1433 | 993  | 71  | 101.68 | 6.19  | 0.08 |
| chr19 | 41337427 | 41339033 | 1607 | 1207 | 77  | 229.54 | 8.71  | 0    |
| chr19 | 41847679 | 41849428 | 1750 | 1238 | 81  | 168.28 | 6.8   | 0.06 |
| chr19 | 41875740 | 41877011 | 1272 | 847  | 58  | 187.61 | 9.52  | 0    |
| chr19 | 41903896 | 41905267 | 1372 | 437  | 43  | 81.19  | 8.09  | 0.1  |

|       |          |          |      |      |     |        |       |      |
|-------|----------|----------|------|------|-----|--------|-------|------|
| chr19 | 41985695 | 41986779 | 1085 | 541  | 44  | 103.48 | 7.71  | 0.06 |
| chr19 | 42055150 | 42057237 | 2088 | 810  | 115 | 305.23 | 9.39  | 0    |
| chr19 | 42202982 | 42204300 | 1319 | 400  | 51  | 84.72  | 4.21  | 0.06 |
| chr19 | 42244742 | 42245584 | 843  | 359  | 48  | 87.26  | 4.62  | 0.07 |
| chr19 | 43597961 | 43599493 | 1533 | 1130 | 70  | 121.71 | 6.36  | 0.07 |
| chr19 | 43749039 | 43750459 | 1421 | 651  | 72  | 196.11 | 7.95  | 0    |
| chr19 | 43826656 | 43828180 | 1525 | 740  | 112 | 394.23 | 10.68 | 0    |
| chr19 | 44143524 | 44144601 | 1078 | 572  | 51  | 142.68 | 7.32  | 0.09 |
| chr19 | 44181421 | 44182409 | 989  | 470  | 43  | 82.89  | 7.78  | 0.11 |
| chr19 | 44637045 | 44637768 | 724  | 197  | 26  | 79.39  | 8.09  | 0.1  |
| chr19 | 45149090 | 45150345 | 1256 | 478  | 51  | 80.48  | 5.08  | 0.1  |
| chr19 | 45437487 | 45438796 | 1310 | 559  | 63  | 77.75  | 4.05  | 0.12 |
| chr19 | 45734036 | 45735259 | 1224 | 730  | 54  | 130.14 | 7.36  | 0.08 |
| chr19 | 45857162 | 45858454 | 1293 | 824  | 65  | 154.25 | 6.8   | 0.1  |
| chr19 | 46072038 | 46073430 | 1393 | 776  | 68  | 240.76 | 8.57  | 0    |
| chr19 | 46077560 | 46078518 | 959  | 476  | 38  | 88.49  | 9.25  | 0.07 |
| chr19 | 46113826 | 46114596 | 771  | 380  | 30  | 94.47  | 8.34  | 0.07 |
| chr19 | 46119234 | 46120329 | 1096 | 578  | 46  | 99.61  | 7.39  | 0.08 |
| chr19 | 46378425 | 46380614 | 2190 | 632  | 115 | 148.81 | 5.69  | 0.1  |
| chr19 | 46402605 | 46403640 | 1036 | 585  | 43  | 77.19  | 4.67  | 0.12 |
| chr19 | 46404226 | 46405001 | 776  | 339  | 29  | 72.52  | 6.67  | 0.15 |
| chr19 | 46412397 | 46414921 | 2525 | 735  | 126 | 103.08 | 4.33  | 0.06 |
| chr19 | 46471037 | 46471888 | 852  | 376  | 37  | 84.27  | 6.89  | 0.06 |
| chr19 | 46573931 | 46579413 | 5483 | 4764 | 303 | 800.38 | 7.75  | 0    |
| chr19 | 46672823 | 46674145 | 1323 | 892  | 63  | 132.04 | 6.53  | 0.08 |
| chr19 | 46835237 | 46836573 | 1337 | 935  | 63  | 104.31 | 4.32  | 0.06 |
| chr19 | 46937779 | 46938718 | 940  | 458  | 36  | 75.72  | 8.09  | 0.13 |
| chr19 | 47035761 | 47037148 | 1388 | 1190 | 50  | 139.49 | 6.59  | 0.09 |
| chr19 | 47211596 | 47213113 | 1518 | 1231 | 65  | 162.76 | 7.13  | 0.12 |
| chr19 | 47538018 | 47539109 | 1092 | 796  | 43  | 109.55 | 5.9   | 0.06 |
| chr19 | 47610949 | 47612214 | 1266 | 537  | 54  | 180.66 | 8.09  | 0    |
| chr19 | 47805170 | 47806839 | 1670 | 624  | 80  | 125.35 | 5.48  | 0.07 |
| chr19 | 47928990 | 47929936 | 947  | 516  | 38  | 84.54  | 7.36  | 0.06 |
| chr19 | 53215786 | 53217787 | 2002 | 1271 | 102 | 192.46 | 6.14  | 0    |
| chr19 | 53385244 | 53386677 | 1434 | 408  | 57  | 134.1  | 5.23  | 0.08 |
| chr19 | 53386751 | 53389232 | 2482 | 974  | 97  | 180.2  | 5.48  | 0    |
| chr19 | 53464145 | 53465840 | 1696 | 1141 | 92  | 165.62 | 5.56  | 0.06 |
| chr19 | 53603028 | 53603998 | 971  | 458  | 40  | 152.93 | 12.82 | 0.1  |
| chr19 | 53977105 | 53978419 | 1315 | 556  | 63  | 91.03  | 4.9   | 0.07 |
| chr19 | 54018064 | 54019709 | 1646 | 1145 | 76  | 112.29 | 4.44  | 0.06 |
| chr19 | 55173402 | 55174463 | 1062 | 613  | 51  | 110.82 | 7.78  | 0.06 |
| chr19 | 55390055 | 55391104 | 1050 | 477  | 48  | 129.8  | 7.71  | 0.08 |
| chr19 | 55816759 | 55818644 | 1886 | 1382 | 79  | 211.58 | 9.33  | 0    |
| chr19 | 56622700 | 56623718 | 1019 | 462  | 41  | 116.53 | 7.19  | 0.07 |

|       |          |          |      |      |     |        |       |      |
|-------|----------|----------|------|------|-----|--------|-------|------|
| chr19 | 57432308 | 57433419 | 1112 | 704  | 48  | 84.9   | 5.69  | 0.06 |
| chr19 | 57434846 | 57435911 | 1066 | 398  | 49  | 106.34 | 6.8   | 0.06 |
| chr19 | 57684128 | 57686037 | 1910 | 611  | 86  | 307.34 | 8.99  | 0    |
| chr19 | 59149181 | 59150429 | 1249 | 196  | 49  | 108.7  | 5.39  | 0.06 |
| chr19 | 60018897 | 60019911 | 1015 | 586  | 58  | 217.26 | 9.79  | 0    |
| chr19 | 60301921 | 60302853 | 933  | 375  | 44  | 111.74 | 6.33  | 0.06 |
| chr19 | 60674030 | 60674871 | 842  | 534  | 32  | 94.08  | 7.61  | 0.07 |
| chr19 | 60865808 | 60867239 | 1432 | 860  | 85  | 253.54 | 8.76  | 0    |
| chr19 | 61301875 | 61304896 | 3022 | 2363 | 155 | 157.62 | 4.24  | 0.11 |
| chr2  | 3249410  | 3250052  | 643  | 343  | 24  | 77.49  | 6.57  | 0.12 |
| chr2  | 3391376  | 3393036  | 1661 | 1247 | 63  | 91.83  | 4.36  | 0.07 |
| chr2  | 3429443  | 3430855  | 1413 | 392  | 52  | 84.91  | 5.06  | 0.07 |
| chr2  | 4802683  | 4803906  | 1224 | 357  | 42  | 133.05 | 8.16  | 0.08 |
| chr2  | 5634362  | 5635748  | 1387 | 696  | 61  | 95.6   | 4.18  | 0.08 |
| chr2  | 5765518  | 5766743  | 1226 | 832  | 49  | 71.35  | 4.33  | 0.15 |
| chr2  | 5871740  | 5873170  | 1431 | 494  | 64  | 96.75  | 4.32  | 0.08 |
| chr2  | 6243118  | 6244161  | 1044 | 503  | 44  | 80.59  | 6.22  | 0.1  |
| chr2  | 6641711  | 6643242  | 1532 | 941  | 71  | 70.88  | 4.26  | 0.16 |
| chr2  | 11422778 | 11424119 | 1342 | 171  | 47  | 85.43  | 4.57  | 0.07 |
| chr2  | 11474751 | 11476171 | 1421 | 902  | 56  | 77.79  | 4.91  | 0.12 |
| chr2  | 11699020 | 11700850 | 1831 | 1156 | 93  | 175.94 | 6.14  | 0.07 |
| chr2  | 12340512 | 12341592 | 1081 | 492  | 44  | 97.7   | 6.62  | 0.08 |
| chr2  | 13494321 | 13497900 | 3580 | 1103 | 177 | 399.61 | 7.32  | 0    |
| chr2  | 13995083 | 13996186 | 1104 | 555  | 54  | 132.87 | 7.75  | 0.08 |
| chr2  | 14113531 | 14114242 | 712  | 315  | 29  | 87.75  | 8.09  | 0.07 |
| chr2  | 17977321 | 17978353 | 1033 | 817  | 44  | 162.97 | 8.81  | 0.06 |
| chr2  | 17978429 | 17979881 | 1453 | 296  | 71  | 292.82 | 12.92 | 0    |
| chr2  | 17985535 | 17987267 | 1733 | 686  | 73  | 160.47 | 6.62  | 0.11 |
| chr2  | 18313854 | 18314828 | 975  | 609  | 40  | 75.81  | 4.21  | 0.14 |
| chr2  | 18508291 | 18509410 | 1120 | 598  | 48  | 119.9  | 6.93  | 0.07 |
| chr2  | 18529398 | 18531486 | 2089 | 327  | 71  | 230.46 | 8.74  | 0    |
| chr2  | 18593377 | 18594520 | 1144 | 727  | 44  | 155.95 | 9.32  | 0.11 |
| chr2  | 18598471 | 18599157 | 687  | 338  | 29  | 117.75 | 10.49 | 0.07 |
| chr2  | 18615359 | 18616368 | 1010 | 467  | 45  | 170.27 | 8.09  | 0.06 |
| chr2  | 18688158 | 18689367 | 1210 | 809  | 58  | 209.81 | 10.28 | 0    |
| chr2  | 18918934 | 18920448 | 1515 | 1142 | 67  | 149.33 | 5.98  | 0.1  |
| chr2  | 19578860 | 19579934 | 1075 | 522  | 42  | 131.38 | 10.11 | 0.08 |
| chr2  | 21126534 | 21127866 | 1333 | 816  | 65  | 133.08 | 7.19  | 0.08 |
| chr2  | 22628838 | 22631022 | 2185 | 936  | 104 | 132.28 | 5.71  | 0.08 |
| chr2  | 22750430 | 22751613 | 1184 | 617  | 55  | 76.63  | 4.41  | 0.12 |
| chr2  | 22894822 | 22896096 | 1275 | 797  | 63  | 175.75 | 11.56 | 0.07 |
| chr2  | 22923112 | 22925227 | 2116 | 1698 | 96  | 160.08 | 5.49  | 0.11 |
| chr2  | 23427047 | 23427763 | 717  | 496  | 27  | 99.57  | 8.16  | 0.08 |
| chr2  | 24774245 | 24775552 | 1308 | 789  | 57  | 94.18  | 4.33  | 0.07 |

|      |          |          |      |      |     |        |       |      |
|------|----------|----------|------|------|-----|--------|-------|------|
| chr2 | 24790097 | 24791128 | 1032 | 524  | 49  | 154.58 | 8.09  | 0.1  |
| chr2 | 24829983 | 24832163 | 2181 | 1671 | 116 | 208.99 | 7.05  | 0    |
| chr2 | 24909455 | 24910642 | 1188 | 495  | 53  | 137.64 | 8.48  | 0.09 |
| chr2 | 25048545 | 25050630 | 2086 | 894  | 94  | 89.77  | 3.72  | 0.07 |
| chr2 | 25051091 | 25052767 | 1677 | 386  | 76  | 163.28 | 6.41  | 0.06 |
| chr2 | 25066316 | 25067292 | 977  | 448  | 44  | 89.03  | 6.85  | 0.07 |
| chr2 | 25079611 | 25080886 | 1276 | 563  | 66  | 108.28 | 5.15  | 0.06 |
| chr2 | 25110233 | 25111550 | 1318 | 750  | 62  | 127.92 | 8.09  | 0.08 |
| chr2 | 25117401 | 25118557 | 1157 | 484  | 52  | 108.52 | 5.83  | 0.06 |
| chr2 | 25127448 | 25128520 | 1073 | 484  | 60  | 135.74 | 9.21  | 0.08 |
| chr2 | 25187602 | 25188858 | 1257 | 537  | 80  | 90.05  | 5.45  | 0.07 |
| chr2 | 25212978 | 25213960 | 983  | 527  | 37  | 77.07  | 6.34  | 0.12 |
| chr2 | 25220217 | 25221622 | 1406 | 924  | 78  | 207.4  | 9.75  | 0    |
| chr2 | 25278008 | 25279093 | 1086 | 308  | 54  | 157.51 | 7.64  | 0.11 |
| chr2 | 25316009 | 25317574 | 1566 | 480  | 66  | 161.61 | 7.52  | 0.11 |
| chr2 | 25355894 | 25356938 | 1045 | 539  | 50  | 114.33 | 8.74  | 0.06 |
| chr2 | 25412594 | 25414093 | 1500 | 637  | 68  | 92.96  | 4.8   | 0.07 |
| chr2 | 25463330 | 25464318 | 989  | 450  | 38  | 74.61  | 6.68  | 0.13 |
| chr2 | 25838411 | 25839582 | 1172 | 412  | 46  | 109.85 | 6.88  | 0.06 |
| chr2 | 25876796 | 25877743 | 948  | 405  | 37  | 79.56  | 6.25  | 0.1  |
| chr2 | 25994845 | 25996554 | 1710 | 1007 | 81  | 147.04 | 6.07  | 0.09 |
| chr2 | 26092332 | 26093259 | 928  | 425  | 34  | 82.87  | 7.24  | 0.11 |
| chr2 | 26206859 | 26208010 | 1152 | 371  | 59  | 91.81  | 5     | 0.07 |
| chr2 | 26244188 | 26245380 | 1193 | 625  | 70  | 252.6  | 13.35 | 0    |
| chr2 | 26300157 | 26302122 | 1966 | 664  | 126 | 367.28 | 8.73  | 0    |
| chr2 | 26459063 | 26460354 | 1292 | 751  | 68  | 132.8  | 5.66  | 0.08 |
| chr2 | 26495187 | 26496744 | 1558 | 734  | 95  | 349.44 | 11.33 | 0    |
| chr2 | 26599675 | 26600395 | 721  | 366  | 25  | 73.4   | 9.05  | 0.13 |
| chr2 | 26757751 | 26759154 | 1404 | 721  | 60  | 154.98 | 5.66  | 0.1  |
| chr2 | 26765720 | 26767056 | 1337 | 571  | 71  | 146.97 | 6.14  | 0.09 |
| chr2 | 26788415 | 26789330 | 916  | 451  | 33  | 72.38  | 7.57  | 0.15 |
| chr2 | 26796578 | 26797701 | 1124 | 601  | 48  | 93.98  | 6.15  | 0.07 |
| chr2 | 26819250 | 26820325 | 1076 | 714  | 46  | 80.64  | 4.49  | 0.1  |
| chr2 | 26865032 | 26866033 | 1002 | 502  | 46  | 151.89 | 8.68  | 0.1  |
| chr2 | 27369776 | 27371114 | 1339 | 701  | 72  | 144.29 | 6.47  | 0.09 |
| chr2 | 27394952 | 27396306 | 1355 | 406  | 61  | 96.51  | 6.85  | 0.08 |
| chr2 | 28496151 | 28497213 | 1063 | 625  | 48  | 152.36 | 7.19  | 0.1  |
| chr2 | 28695290 | 28696563 | 1274 | 751  | 54  | 96.87  | 5.29  | 0.08 |
| chr2 | 28915275 | 28916793 | 1519 | 501  | 64  | 106.48 | 6.07  | 0.06 |
| chr2 | 28980339 | 28981588 | 1250 | 839  | 47  | 70.54  | 4.98  | 0.16 |
| chr2 | 29642743 | 29644361 | 1619 | 405  | 80  | 218.85 | 8.23  | 0    |
| chr2 | 29744491 | 29745714 | 1224 | 590  | 61  | 94.91  | 4.9   | 0.07 |
| chr2 | 29790502 | 29791380 | 879  | 422  | 33  | 89.08  | 8.09  | 0.07 |
| chr2 | 29819650 | 29821691 | 2042 | 1549 | 110 | 372.01 | 13.56 | 0    |

|      |          |          |      |      |     |        |       |      |
|------|----------|----------|------|------|-----|--------|-------|------|
| chr2 | 29904002 | 29905177 | 1176 | 597  | 63  | 127.32 | 6.2   | 0.07 |
| chr2 | 29917649 | 29918585 | 937  | 377  | 42  | 160.89 | 9.71  | 0.11 |
| chr2 | 29921031 | 29922549 | 1519 | 760  | 73  | 190.42 | 6.62  | 0    |
| chr2 | 29948958 | 29949814 | 857  | 444  | 40  | 81.88  | 5.39  | 0.1  |
| chr2 | 29988443 | 29989895 | 1453 | 831  | 82  | 220.62 | 9.71  | 0    |
| chr2 | 30141236 | 30142432 | 1197 | 715  | 58  | 112.98 | 7.51  | 0.06 |
| chr2 | 30270284 | 30272211 | 1928 | 870  | 130 | 217.02 | 6.12  | 0    |
| chr2 | 30296862 | 30298300 | 1439 | 505  | 58  | 88.48  | 5.37  | 0.07 |
| chr2 | 30327490 | 30328979 | 1490 | 909  | 62  | 160.4  | 6.26  | 0.11 |
| chr2 | 30329007 | 30330189 | 1183 | 728  | 70  | 168.15 | 9.49  | 0.06 |
| chr2 | 30513312 | 30514743 | 1432 | 928  | 69  | 117.24 | 5.66  | 0.07 |
| chr2 | 30562843 | 30564435 | 1593 | 612  | 65  | 179    | 6.29  | 0    |
| chr2 | 30566732 | 30568110 | 1379 | 883  | 52  | 76.6   | 4.96  | 0.12 |
| chr2 | 30572459 | 30575368 | 2910 | 2187 | 141 | 366.28 | 7.42  | 0    |
| chr2 | 30649834 | 30650878 | 1045 | 566  | 45  | 75.52  | 4.62  | 0.13 |
| chr2 | 30662792 | 30663919 | 1128 | 558  | 78  | 171.2  | 7.19  | 0.06 |
| chr2 | 30683253 | 30684309 | 1057 | 547  | 53  | 115.5  | 7.49  | 0.06 |
| chr2 | 30807986 | 30809026 | 1041 | 497  | 50  | 142.65 | 11.17 | 0.09 |
| chr2 | 30822890 | 30823824 | 935  | 475  | 32  | 74.11  | 7.39  | 0.13 |
| chr2 | 30836742 | 30837991 | 1250 | 655  | 62  | 90.57  | 5     | 0.07 |
| chr2 | 30996931 | 30998087 | 1157 | 523  | 55  | 133.04 | 7.54  | 0.08 |
| chr2 | 31543311 | 31544702 | 1392 | 893  | 63  | 81.86  | 4.9   | 0.1  |
| chr2 | 31829383 | 31830479 | 1097 | 558  | 58  | 116.06 | 7.82  | 0.07 |
| chr2 | 31938327 | 31939800 | 1474 | 523  | 62  | 144.33 | 7.98  | 0.09 |
| chr2 | 31992976 | 31993800 | 825  | 484  | 41  | 96.05  | 8.4   | 0.08 |
| chr2 | 32091587 | 32092577 | 991  | 531  | 36  | 75.04  | 6.93  | 0.13 |
| chr2 | 32217946 | 32219582 | 1637 | 480  | 73  | 183.86 | 7.71  | 0    |
| chr2 | 32250695 | 32252456 | 1762 | 512  | 90  | 139.73 | 6.13  | 0.09 |
| chr2 | 32306710 | 32308254 | 1545 | 299  | 82  | 166.32 | 6.11  | 0.06 |
| chr2 | 32426032 | 32426935 | 904  | 522  | 37  | 90.24  | 8.48  | 0.07 |
| chr2 | 32462805 | 32464504 | 1700 | 503  | 62  | 92.67  | 4.28  | 0.07 |
| chr2 | 32566872 | 32569607 | 2736 | 1675 | 124 | 259.26 | 6.61  | 0    |
| chr2 | 32731208 | 32732148 | 941  | 485  | 42  | 79.86  | 5.09  | 0.1  |
| chr2 | 32821854 | 32823101 | 1248 | 744  | 68  | 86.24  | 5.06  | 0.07 |
| chr2 | 32836701 | 32837960 | 1260 | 903  | 54  | 111.09 | 7.42  | 0.06 |
| chr2 | 32985934 | 32987314 | 1381 | 830  | 58  | 79.34  | 4.58  | 0.1  |
| chr2 | 33286120 | 33287230 | 1111 | 823  | 51  | 154.47 | 7.66  | 0.1  |
| chr2 | 34657469 | 34658070 | 602  | 380  | 49  | 226.52 | 13.86 | 0    |
| chr2 | 34681140 | 34682134 | 995  | 627  | 49  | 94.83  | 6.42  | 0.07 |
| chr2 | 34725907 | 34727284 | 1378 | 877  | 71  | 109.01 | 5.24  | 0.06 |
| chr2 | 34760167 | 34761319 | 1153 | 517  | 50  | 78.72  | 5.3   | 0.12 |
| chr2 | 34964722 | 34965844 | 1123 | 494  | 51  | 77.26  | 4.44  | 0.12 |
| chr2 | 35055479 | 35057039 | 1561 | 1016 | 79  | 158.87 | 7.22  | 0.11 |
| chr2 | 35191958 | 35192893 | 936  | 644  | 40  | 71.7   | 4.79  | 0.15 |

|      |          |          |      |      |     |         |       |      |
|------|----------|----------|------|------|-----|---------|-------|------|
| chr2 | 35315839 | 35317898 | 2060 | 1193 | 87  | 227.33  | 5.93  | 0    |
| chr2 | 35834480 | 35835796 | 1317 | 926  | 47  | 75.33   | 5.98  | 0.13 |
| chr2 | 35991462 | 35992708 | 1247 | 665  | 64  | 115.15  | 5.22  | 0.06 |
| chr2 | 37277842 | 37278935 | 1094 | 639  | 66  | 178.43  | 8.99  | 0    |
| chr2 | 37285743 | 37286937 | 1195 | 445  | 53  | 137.29  | 6.96  | 0.08 |
| chr2 | 37298142 | 37299047 | 906  | 659  | 36  | 84.84   | 6.16  | 0.06 |
| chr2 | 37307264 | 37308359 | 1096 | 534  | 58  | 250.68  | 15.1  | 0    |
| chr2 | 38142191 | 38143333 | 1143 | 406  | 51  | 176.18  | 10.42 | 0.07 |
| chr2 | 38920614 | 38921641 | 1028 | 439  | 44  | 77.82   | 4.79  | 0.12 |
| chr2 | 44782002 | 44783414 | 1413 | 412  | 63  | 153.11  | 9.15  | 0.1  |
| chr2 | 44962619 | 44969119 | 6501 | 3067 | 456 | 1765.96 | 11.56 | 0    |
| chr2 | 44970979 | 44973713 | 2735 | 1970 | 162 | 386.67  | 8.09  | 0    |
| chr2 | 48804053 | 48805762 | 1710 | 698  | 74  | 140.4   | 5.5   | 0.09 |
| chr2 | 49306241 | 49308028 | 1788 | 1342 | 86  | 263.01  | 7.24  | 0    |
| chr2 | 50151646 | 50152630 | 985  | 535  | 38  | 75.06   | 8.09  | 0.13 |
| chr2 | 51789921 | 51790832 | 912  | 633  | 43  | 122.13  | 7.32  | 0.07 |
| chr2 | 51827666 | 51829162 | 1497 | 707  | 73  | 193.84  | 8.09  | 0    |
| chr2 | 52280053 | 52280843 | 791  | 474  | 32  | 122.5   | 12.14 | 0.07 |
| chr2 | 52600898 | 52601830 | 933  | 534  | 44  | 80.99   | 6.7   | 0.1  |
| chr2 | 53049624 | 53051529 | 1906 | 1295 | 104 | 315.24  | 9.03  | 0    |
| chr2 | 56975724 | 56977074 | 1351 | 396  | 51  | 174.92  | 8.74  | 0.07 |
| chr2 | 57034005 | 57035267 | 1263 | 512  | 79  | 262.14  | 12.31 | 0    |
| chr2 | 57089736 | 57091202 | 1467 | 420  | 71  | 189.18  | 7.42  | 0    |
| chr2 | 59720111 | 59721148 | 1038 | 308  | 50  | 109.38  | 5.91  | 0.06 |
| chr2 | 59962282 | 59964272 | 1991 | 533  | 97  | 373.6   | 13.31 | 0    |
| chr2 | 60047116 | 60048430 | 1315 | 908  | 57  | 133.45  | 8.83  | 0.08 |
| chr2 | 60121407 | 60122707 | 1301 | 473  | 48  | 75.58   | 5.06  | 0.13 |
| chr2 | 60717837 | 60719936 | 2100 | 1591 | 88  | 245.99  | 8.14  | 0    |
| chr2 | 61430723 | 61432030 | 1308 | 891  | 61  | 99.69   | 4.32  | 0.08 |
| chr2 | 69560371 | 69561619 | 1249 | 504  | 67  | 141.51  | 7.53  | 0.09 |
| chr2 | 69699074 | 69700131 | 1058 | 630  | 45  | 175.17  | 12.82 | 0.07 |
| chr2 | 69723169 | 69724411 | 1243 | 672  | 57  | 135.54  | 5.63  | 0.08 |
| chr2 | 69734771 | 69735743 | 973  | 425  | 35  | 88.85   | 7.19  | 0.07 |
| chr2 | 70893079 | 70894564 | 1486 | 489  | 74  | 124.79  | 5.48  | 0.07 |
| chr2 | 71049397 | 71050823 | 1427 | 465  | 57  | 193.56  | 7.71  | 0    |
| chr2 | 71111958 | 71112962 | 1005 | 489  | 39  | 82.49   | 5.52  | 0.11 |
| chr2 | 71710759 | 71711776 | 1018 | 555  | 44  | 74.57   | 5.49  | 0.13 |
| chr2 | 72123505 | 72124505 | 1001 | 727  | 40  | 77.49   | 5.06  | 0.12 |
| chr2 | 72816609 | 72819435 | 2827 | 1990 | 163 | 588.81  | 14.56 | 0    |
| chr2 | 73150284 | 73151223 | 940  | 542  | 36  | 112.3   | 8.6   | 0.06 |
| chr2 | 73323523 | 73324755 | 1233 | 971  | 47  | 88.19   | 4.57  | 0.07 |
| chr2 | 73367220 | 73368179 | 960  | 345  | 40  | 142.7   | 9.64  | 0.09 |
| chr2 | 73748995 | 73749983 | 989  | 408  | 37  | 85.52   | 6.47  | 0.07 |
| chr2 | 74663389 | 74664381 | 993  | 439  | 38  | 135.08  | 7.51  | 0.08 |

|      |           |           |      |      |     |        |       |      |
|------|-----------|-----------|------|------|-----|--------|-------|------|
| chr2 | 75496576  | 75498340  | 1765 | 1197 | 93  | 264.65 | 8.06  | 0    |
| chr2 | 75541215  | 75543681  | 2467 | 705  | 175 | 561.32 | 10.58 | 0    |
| chr2 | 75776266  | 75777245  | 980  | 416  | 37  | 127.58 | 7.93  | 0.07 |
| chr2 | 76485848  | 76486963  | 1116 | 618  | 51  | 122.23 | 6.33  | 0.07 |
| chr2 | 76510700  | 76511742  | 1043 | 370  | 40  | 107.78 | 7.19  | 0.06 |
| chr2 | 76512781  | 76513575  | 795  | 481  | 27  | 74.71  | 5.92  | 0.13 |
| chr2 | 79474948  | 79476512  | 1565 | 972  | 74  | 178.64 | 7.04  | 0    |
| chr2 | 83564009  | 83565188  | 1180 | 742  | 51  | 84.45  | 4.05  | 0.06 |
| chr2 | 84490250  | 84491429  | 1180 | 626  | 52  | 201.02 | 11.32 | 0    |
| chr2 | 84518098  | 84519079  | 982  | 501  | 39  | 80.02  | 6.68  | 0.1  |
| chr2 | 84554398  | 84556607  | 2210 | 277  | 84  | 187.53 | 5.41  | 0    |
| chr2 | 84567257  | 84568216  | 960  | 265  | 52  | 104.15 | 6     | 0.06 |
| chr2 | 84877020  | 84878101  | 1082 | 698  | 48  | 140.81 | 6.81  | 0.09 |
| chr2 | 84887688  | 84888574  | 887  | 466  | 43  | 113.31 | 6.68  | 0.06 |
| chr2 | 90419093  | 90420303  | 1211 | 731  | 53  | 101.54 | 4.85  | 0.08 |
| chr2 | 90584378  | 90586233  | 1856 | 1357 | 99  | 185.88 | 8.09  | 0    |
| chr2 | 90757158  | 90758905  | 1748 | 653  | 98  | 331.27 | 9.3   | 0    |
| chr2 | 90780286  | 90781552  | 1267 | 864  | 58  | 223.05 | 10.93 | 0    |
| chr2 | 90893708  | 90894754  | 1047 | 569  | 50  | 149.77 | 9.71  | 0.1  |
| chr2 | 90909530  | 90911279  | 1750 | 1008 | 104 | 212.8  | 7.59  | 0    |
| chr2 | 90921987  | 90925444  | 3458 | 1130 | 260 | 622.56 | 8.55  | 0    |
| chr2 | 90935830  | 90939465  | 3636 | 1201 | 208 | 426.07 | 7.55  | 0    |
| chr2 | 91022338  | 91024568  | 2231 | 723  | 111 | 316.97 | 8.24  | 0    |
| chr2 | 91042426  | 91043671  | 1246 | 510  | 63  | 136.23 | 6.29  | 0.08 |
| chr2 | 91077036  | 91077803  | 768  | 372  | 29  | 85.95  | 7.14  | 0.07 |
| chr2 | 91104541  | 91106228  | 1688 | 1064 | 79  | 152.15 | 5.16  | 0.1  |
| chr2 | 91252179  | 91253164  | 986  | 380  | 39  | 109.36 | 6.29  | 0.06 |
| chr2 | 91803389  | 91804574  | 1186 | 510  | 59  | 132.33 | 8.71  | 0.08 |
| chr2 | 91805305  | 91807008  | 1704 | 322  | 79  | 174.56 | 7.42  | 0.07 |
| chr2 | 91848025  | 91849214  | 1190 | 723  | 45  | 118.25 | 6.78  | 0.07 |
| chr2 | 92022885  | 92024482  | 1598 | 688  | 79  | 333.18 | 10.9  | 0    |
| chr2 | 92885416  | 92886497  | 1082 | 550  | 51  | 184.86 | 9.37  | 0    |
| chr2 | 93302037  | 93302980  | 944  | 626  | 41  | 77.32  | 5.5   | 0.12 |
| chr2 | 93689435  | 93690453  | 1019 | 450  | 48  | 78.15  | 4.44  | 0.12 |
| chr2 | 93850496  | 93851283  | 788  | 396  | 35  | 89.99  | 6.99  | 0.07 |
| chr2 | 94245869  | 94247328  | 1460 | 1033 | 57  | 175.68 | 7.19  | 0.07 |
| chr2 | 94277990  | 94278531  | 542  | 325  | 21  | 77.03  | 8.63  | 0.12 |
| chr2 | 98502239  | 98503302  | 1064 | 674  | 668 | 256.65 | 2.84  | 0    |
| chr2 | 98503660  | 98504401  | 742  | 341  | 221 | 95.54  | 3.84  | 0.08 |
| chr2 | 98506244  | 98507865  | 1622 | 911  | 935 | 96.34  | 2.34  | 0.08 |
| chr2 | 101468561 | 101469672 | 1112 | 692  | 42  | 90.28  | 6.16  | 0.07 |
| chr2 | 102739412 | 102740422 | 1011 | 198  | 36  | 81.47  | 4.59  | 0.1  |
| chr2 | 103635794 | 103638353 | 2560 | 1935 | 122 | 362.28 | 9.79  | 0    |
| chr2 | 103809329 | 103810716 | 1388 | 952  | 57  | 159.01 | 7.15  | 0.11 |

|      |           |           |      |      |    |        |       |      |
|------|-----------|-----------|------|------|----|--------|-------|------|
| chr2 | 104333134 | 104335040 | 1907 | 697  | 97 | 409.99 | 9.62  | 0    |
| chr2 | 104430120 | 104431132 | 1013 | 514  | 41 | 85.77  | 5.28  | 0.07 |
| chr2 | 104656777 | 104657744 | 968  | 446  | 36 | 108.75 | 11.12 | 0.06 |
| chr2 | 104856581 | 104857813 | 1233 | 706  | 65 | 235.37 | 10.79 | 0    |
| chr2 | 106813940 | 106814934 | 995  | 564  | 43 | 123.96 | 7.66  | 0.07 |
| chr2 | 112105398 | 112106865 | 1468 | 793  | 76 | 100.03 | 4.15  | 0.08 |
| chr2 | 112332397 | 112333687 | 1291 | 866  | 58 | 191.13 | 10.95 | 0    |
| chr2 | 113280580 | 113281695 | 1116 | 502  | 43 | 115.45 | 6.74  | 0.06 |
| chr2 | 113688090 | 113689803 | 1714 | 446  | 67 | 124.91 | 5.63  | 0.07 |
| chr2 | 114026760 | 114027389 | 630  | 228  | 22 | 76.76  | 6.89  | 0.12 |
| chr2 | 114480097 | 114481145 | 1049 | 633  | 60 | 160.58 | 12.45 | 0.11 |
| chr2 | 116800901 | 116802119 | 1219 | 463  | 53 | 156.01 | 7.48  | 0.11 |
| chr2 | 116945974 | 116947324 | 1351 | 900  | 66 | 182.37 | 9.05  | 0    |
| chr2 | 117075056 | 117075934 | 879  | 498  | 29 | 92.51  | 8.16  | 0.07 |
| chr2 | 117952722 | 117954400 | 1679 | 783  | 66 | 194.93 | 7.45  | 0    |
| chr2 | 118213959 | 118214889 | 931  | 528  | 39 | 97.23  | 7.32  | 0.08 |
| chr2 | 118374786 | 118375812 | 1027 | 585  | 44 | 124.49 | 7.2   | 0.07 |
| chr2 | 118570923 | 118571634 | 712  | 450  | 26 | 78.16  | 6.86  | 0.12 |
| chr2 | 118726660 | 118727442 | 783  | 449  | 31 | 70.08  | 6.25  | 0.16 |
| chr2 | 118751906 | 118753518 | 1613 | 448  | 63 | 126.24 | 5.15  | 0.07 |
| chr2 | 118798143 | 118799123 | 981  | 465  | 38 | 80.5   | 8.09  | 0.1  |
| chr2 | 118860103 | 118861060 | 958  | 464  | 46 | 73.84  | 6.07  | 0.13 |
| chr2 | 118872102 | 118873241 | 1140 | 486  | 62 | 163.2  | 10.68 | 0.06 |
| chr2 | 118937831 | 118938857 | 1027 | 473  | 47 | 96.43  | 7.16  | 0.08 |
| chr2 | 118982182 | 118983230 | 1049 | 530  | 45 | 106.87 | 8.46  | 0.06 |
| chr2 | 119113859 | 119115385 | 1527 | 617  | 86 | 150.15 | 5.95  | 0.1  |
| chr2 | 119163155 | 119164125 | 971  | 470  | 43 | 95.43  | 5.39  | 0.08 |
| chr2 | 119302837 | 119304378 | 1542 | 472  | 80 | 158.29 | 6.7   | 0.11 |
| chr2 | 119372424 | 119373435 | 1012 | 346  | 39 | 83.07  | 5.58  | 0.11 |
| chr2 | 119419632 | 119420880 | 1249 | 720  | 50 | 182.06 | 8.74  | 0    |
| chr2 | 119612808 | 119613650 | 843  | 476  | 27 | 77.42  | 9.17  | 0.12 |
| chr2 | 119979664 | 119980699 | 1036 | 518  | 51 | 88.45  | 6.26  | 0.07 |
| chr2 | 120178063 | 120179116 | 1054 | 509  | 48 | 165.12 | 11.56 | 0.06 |
| chr2 | 120229459 | 120230562 | 1104 | 449  | 42 | 70.08  | 4.21  | 0.16 |
| chr2 | 120389018 | 120389794 | 777  | 451  | 27 | 84.8   | 7.01  | 0.06 |
| chr2 | 120434327 | 120435694 | 1368 | 866  | 76 | 148.4  | 5.66  | 0.1  |
| chr2 | 120454561 | 120455421 | 861  | 330  | 53 | 121.17 | 7.08  | 0.07 |
| chr2 | 120556580 | 120557816 | 1237 | 772  | 56 | 150.32 | 7.69  | 0.1  |
| chr2 | 120795784 | 120796968 | 1185 | 538  | 55 | 101.02 | 6.07  | 0.08 |
| chr2 | 120802686 | 120803662 | 977  | 445  | 39 | 125.92 | 9.1   | 0.07 |
| chr2 | 120965380 | 120966620 | 1241 | 743  | 56 | 138.38 | 8.09  | 0.09 |
| chr2 | 120995494 | 120997391 | 1898 | 1349 | 93 | 305.89 | 11.69 | 0    |
| chr2 | 121238893 | 121240020 | 1128 | 551  | 46 | 101.79 | 5.88  | 0.05 |
| chr2 | 121274116 | 121275901 | 1786 | 491  | 87 | 131.65 | 4.8   | 0.08 |

|      |           |           |      |      |     |         |       |      |
|------|-----------|-----------|------|------|-----|---------|-------|------|
| chr2 | 121299516 | 121300270 | 755  | 342  | 25  | 81.32   | 9.82  | 0.1  |
| chr2 | 121332162 | 121332726 | 565  | 195  | 38  | 216.17  | 16.31 | 0    |
| chr2 | 121853476 | 121855096 | 1621 | 523  | 88  | 144.35  | 7.61  | 0.09 |
| chr2 | 121943337 | 121944672 | 1336 | 761  | 101 | 488.19  | 17.53 | 0    |
| chr2 | 121972892 | 121974754 | 1863 | 545  | 89  | 181.45  | 8.71  | 0    |
| chr2 | 121989282 | 121990540 | 1259 | 806  | 56  | 95.92   | 4.62  | 0.08 |
| chr2 | 122200800 | 122201770 | 971  | 515  | 45  | 76.07   | 8.36  | 0.12 |
| chr2 | 122202796 | 122204231 | 1436 | 390  | 112 | 271.15  | 10.71 | 0    |
| chr2 | 122563609 | 122564744 | 1136 | 702  | 51  | 171.93  | 8.19  | 0.06 |
| chr2 | 122590654 | 122592044 | 1391 | 316  | 54  | 87.85   | 4.67  | 0.07 |
| chr2 | 125498405 | 125499501 | 1097 | 467  | 53  | 115.59  | 7.47  | 0.06 |
| chr2 | 125607869 | 125608955 | 1087 | 661  | 50  | 127.57  | 8.43  | 0.07 |
| chr2 | 126499949 | 126502051 | 2103 | 1624 | 127 | 435.23  | 9.63  | 0    |
| chr2 | 126532456 | 126533795 | 1340 | 676  | 66  | 178.85  | 8.09  | 0    |
| chr2 | 126701048 | 126702573 | 1526 | 1044 | 79  | 350.9   | 15.15 | 0    |
| chr2 | 126758236 | 126759466 | 1231 | 508  | 58  | 134.89  | 9.44  | 0.08 |
| chr2 | 126834005 | 126834952 | 948  | 524  | 40  | 77.6    | 7.67  | 0.12 |
| chr2 | 127073268 | 127074240 | 973  | 440  | 42  | 85.18   | 5.83  | 0.07 |
| chr2 | 127095334 | 127096959 | 1626 | 569  | 95  | 289.88  | 10.2  | 0    |
| chr2 | 127161494 | 127162425 | 932  | 421  | 45  | 139.49  | 11.44 | 0.09 |
| chr2 | 127269887 | 127270801 | 915  | 464  | 42  | 98.14   | 6.07  | 0.08 |
| chr2 | 127951006 | 127952350 | 1345 | 671  | 69  | 85.8    | 4.68  | 0.07 |
| chr2 | 127952552 | 127954192 | 1641 | 531  | 79  | 112.5   | 4.92  | 0.06 |
| chr2 | 128218737 | 128219664 | 928  | 514  | 36  | 77.1    | 5.52  | 0.12 |
| chr2 | 128512662 | 128513525 | 864  | 420  | 31  | 71.33   | 6.99  | 0.15 |
| chr2 | 128524190 | 128525799 | 1610 | 489  | 80  | 269.16  | 14.82 | 0    |
| chr2 | 128643069 | 128645439 | 2371 | 1930 | 119 | 270.85  | 6.83  | 0    |
| chr2 | 128768926 | 128770199 | 1274 | 800  | 57  | 104.16  | 5.39  | 0.06 |
| chr2 | 128792343 | 128794106 | 1764 | 511  | 124 | 353.95  | 8.65  | 0    |
| chr2 | 128926299 | 128926991 | 693  | 499  | 28  | 70.36   | 6.16  | 0.16 |
| chr2 | 128954718 | 128955858 | 1141 | 543  | 55  | 125.61  | 8.09  | 0.07 |
| chr2 | 129023809 | 129024945 | 1137 | 756  | 61  | 102.19  | 6.66  | 0.05 |
| chr2 | 129417571 | 129422013 | 4443 | 1519 | 384 | 1386.66 | 10.23 | 0    |
| chr2 | 129425100 | 129426676 | 1577 | 442  | 61  | 84.77   | 3.68  | 0.06 |
| chr2 | 129458078 | 129459820 | 1743 | 1227 | 77  | 72.25   | 4.59  | 0.15 |
| chr2 | 129461004 | 129461988 | 985  | 432  | 37  | 92.52   | 6.42  | 0.07 |
| chr2 | 129625831 | 129627765 | 1935 | 1467 | 94  | 263.84  | 8.86  | 0    |
| chr2 | 130004495 | 130005642 | 1148 | 514  | 51  | 88.32   | 5.78  | 0.07 |
| chr2 | 130099389 | 130100694 | 1306 | 812  | 78  | 164.46  | 9.1   | 0.06 |
| chr2 | 130109772 | 130110672 | 901  | 450  | 37  | 109.06  | 9.89  | 0.06 |
| chr2 | 130275469 | 130276691 | 1223 | 538  | 60  | 125     | 7.49  | 0.07 |
| chr2 | 130455182 | 130456220 | 1039 | 557  | 40  | 101.35  | 9.79  | 0.08 |
| chr2 | 130985536 | 130986653 | 1118 | 431  | 55  | 89.47   | 4.55  | 0.07 |
| chr2 | 131029843 | 131031187 | 1345 | 577  | 67  | 108.47  | 5.31  | 0.06 |

|      |           |           |      |      |     |        |       |      |
|------|-----------|-----------|------|------|-----|--------|-------|------|
| chr2 | 131035502 | 131037145 | 1644 | 544  | 93  | 128.05 | 6.02  | 0.08 |
| chr2 | 131087825 | 131089065 | 1241 | 779  | 55  | 162.75 | 7.19  | 0.12 |
| chr2 | 131852902 | 131856004 | 3103 | 2535 | 165 | 417.48 | 8.09  | 0    |
| chr2 | 132078496 | 132080025 | 1530 | 473  | 67  | 109.32 | 6.07  | 0.06 |
| chr2 | 132402742 | 132404329 | 1588 | 1097 | 60  | 199.98 | 9.71  | 0    |
| chr2 | 136716425 | 136718369 | 1945 | 550  | 102 | 201.01 | 6.42  | 0    |
| chr2 | 136942035 | 136943305 | 1271 | 903  | 54  | 165.61 | 7.02  | 0.06 |
| chr2 | 143740070 | 143740982 | 913  | 455  | 32  | 97.4   | 6.92  | 0.08 |
| chr2 | 143990930 | 143991946 | 1017 | 426  | 49  | 148.53 | 8.5   | 0.1  |
| chr2 | 144091302 | 144092348 | 1047 | 527  | 47  | 88.62  | 6.29  | 0.07 |
| chr2 | 144094115 | 144097159 | 3045 | 2402 | 144 | 234.69 | 5.66  | 0    |
| chr2 | 144193890 | 144195678 | 1789 | 1159 | 91  | 250.14 | 7.36  | 0    |
| chr2 | 144381044 | 144382520 | 1477 | 532  | 61  | 110    | 4.85  | 0.06 |
| chr2 | 144425238 | 144426314 | 1077 | 561  | 43  | 72.53  | 6.53  | 0.15 |
| chr2 | 146681206 | 146682245 | 1040 | 487  | 49  | 153.3  | 12.77 | 0.1  |
| chr2 | 146837998 | 146839781 | 1784 | 557  | 90  | 168.98 | 6.14  | 0.06 |
| chr2 | 148506252 | 148507364 | 1113 | 604  | 48  | 79.93  | 5.49  | 0.1  |
| chr2 | 150729899 | 150731099 | 1201 | 682  | 53  | 101.42 | 4.98  | 0.08 |
| chr2 | 150734978 | 150735902 | 925  | 346  | 38  | 130.99 | 7.83  | 0.08 |
| chr2 | 151367710 | 151368689 | 980  | 442  | 43  | 81.52  | 7.32  | 0.1  |
| chr2 | 151930777 | 151932133 | 1357 | 532  | 82  | 107.83 | 5.64  | 0.06 |
| chr2 | 152051853 | 152052834 | 982  | 443  | 40  | 90.12  | 7.36  | 0.07 |
| chr2 | 152119322 | 152120315 | 994  | 509  | 38  | 79.01  | 5.88  | 0.1  |
| chr2 | 152655492 | 152657665 | 2174 | 1369 | 107 | 320.25 | 8.26  | 0    |
| chr2 | 152986591 | 152988137 | 1547 | 543  | 79  | 130.87 | 6.07  | 0.08 |
| chr2 | 153040227 | 153041888 | 1662 | 1181 | 80  | 74.63  | 3.21  | 0.13 |
| chr2 | 153066700 | 153067703 | 1004 | 607  | 48  | 122.69 | 7.04  | 0.07 |
| chr2 | 153171250 | 153172762 | 1513 | 527  | 60  | 155.97 | 7.24  | 0.11 |
| chr2 | 153457889 | 153458842 | 954  | 403  | 36  | 74.14  | 6.25  | 0.13 |
| chr2 | 154198040 | 154198706 | 667  | 426  | 26  | 76.75  | 6.78  | 0.12 |
| chr2 | 154438528 | 154440014 | 1487 | 843  | 69  | 173.14 | 8.09  | 0.07 |
| chr2 | 154482079 | 154484149 | 2071 | 560  | 94  | 166.69 | 5.39  | 0.06 |
| chr2 | 154616053 | 154617579 | 1527 | 1077 | 72  | 205.83 | 10.11 | 0    |
| chr2 | 154876072 | 154876942 | 871  | 419  | 42  | 94.18  | 6.53  | 0.07 |
| chr2 | 155207079 | 155208128 | 1050 | 546  | 62  | 164.25 | 9.89  | 0.06 |
| chr2 | 155517446 | 155518436 | 991  | 518  | 49  | 86.08  | 6.26  | 0.07 |
| chr2 | 155644513 | 155645592 | 1080 | 375  | 67  | 164.39 | 7.01  | 0.06 |
| chr2 | 155781667 | 155782854 | 1188 | 750  | 50  | 89.65  | 6.53  | 0.07 |
| chr2 | 155936964 | 155938063 | 1100 | 677  | 53  | 227.3  | 13.4  | 0    |
| chr2 | 156004898 | 156006786 | 1889 | 923  | 159 | 475.69 | 10.79 | 0    |
| chr2 | 156137134 | 156138752 | 1619 | 1089 | 89  | 296.42 | 10.92 | 0    |
| chr2 | 156546167 | 156547306 | 1140 | 662  | 47  | 98.97  | 5.63  | 0.08 |
| chr2 | 156547503 | 156548505 | 1003 | 590  | 39  | 94.08  | 6.47  | 0.07 |
| chr2 | 156688090 | 156690140 | 2051 | 642  | 83  | 85.57  | 4.05  | 0.07 |

|      |           |           |      |      |     |        |       |      |
|------|-----------|-----------|------|------|-----|--------|-------|------|
| chr2 | 156817432 | 156818967 | 1536 | 364  | 49  | 90.42  | 5.66  | 0.07 |
| chr2 | 156904471 | 156905705 | 1235 | 800  | 47  | 122.98 | 6.74  | 0.07 |
| chr2 | 157026826 | 157027912 | 1087 | 689  | 45  | 120.3  | 5.44  | 0.07 |
| chr2 | 157029267 | 157030641 | 1375 | 523  | 52  | 151.26 | 6.49  | 0.1  |
| chr2 | 157104320 | 157105486 | 1167 | 533  | 50  | 149.25 | 8.09  | 0.1  |
| chr2 | 157391786 | 157392885 | 1100 | 701  | 61  | 129.98 | 6.2   | 0.08 |
| chr2 | 157853607 | 157854831 | 1225 | 649  | 57  | 88.58  | 6.26  | 0.07 |
| chr2 | 158235078 | 158236203 | 1126 | 536  | 54  | 116.31 | 7.78  | 0.07 |
| chr2 | 160189663 | 160191238 | 1576 | 336  | 63  | 114.63 | 4.72  | 0.06 |
| chr2 | 160191408 | 160193735 | 2328 | 1351 | 143 | 343.85 | 12.28 | 0    |
| chr2 | 160697903 | 160699343 | 1441 | 1000 | 57  | 114.87 | 5.63  | 0.06 |
| chr2 | 162756923 | 162757746 | 824  | 388  | 45  | 216.61 | 13.4  | 0    |
| chr2 | 163244709 | 163246126 | 1418 | 864  | 77  | 163.29 | 8.65  | 0.06 |
| chr2 | 163297798 | 163298782 | 985  | 529  | 44  | 78.61  | 8.67  | 0.12 |
| chr2 | 163427742 | 163428599 | 858  | 338  | 44  | 101.23 | 5.99  | 0.08 |
| chr2 | 163469673 | 163471428 | 1756 | 1137 | 98  | 159.6  | 8.09  | 0.11 |
| chr2 | 163820371 | 163821591 | 1221 | 203  | 63  | 121.95 | 5.58  | 0.07 |
| chr2 | 163896291 | 163897363 | 1073 | 631  | 45  | 103.72 | 7.72  | 0.06 |
| chr2 | 163899500 | 163900490 | 991  | 387  | 58  | 209.81 | 14.83 | 0    |
| chr2 | 164268097 | 164269201 | 1105 | 590  | 63  | 192.56 | 11.26 | 0    |
| chr2 | 164286172 | 164287297 | 1126 | 344  | 54  | 104.5  | 5.78  | 0.06 |
| chr2 | 164322467 | 164323576 | 1110 | 630  | 49  | 126.7  | 8.86  | 0.07 |
| chr2 | 164570936 | 164572000 | 1065 | 640  | 40  | 85.93  | 5.01  | 0.07 |
| chr2 | 164630014 | 164631244 | 1231 | 488  | 69  | 199.99 | 6.87  | 0    |
| chr2 | 164657961 | 164665703 | 7743 | 1388 | 455 | 313.58 | 6.02  | 0    |
| chr2 | 164681251 | 164683846 | 2596 | 1849 | 147 | 331.99 | 7.51  | 0    |
| chr2 | 164687525 | 164688646 | 1122 | 691  | 47  | 107.55 | 7.36  | 0.06 |
| chr2 | 164703945 | 164706337 | 2393 | 1240 | 168 | 419.54 | 8.09  | 0    |
| chr2 | 164736003 | 164737872 | 1870 | 1024 | 129 | 318.91 | 7.59  | 0    |
| chr2 | 165145795 | 165146891 | 1097 | 436  | 41  | 88.92  | 5.86  | 0.07 |
| chr2 | 165151563 | 165152351 | 789  | 528  | 33  | 70.57  | 5.06  | 0.16 |
| chr2 | 165709239 | 165711807 | 2569 | 2104 | 128 | 329.62 | 9.85  | 0    |
| chr2 | 165742697 | 165743819 | 1123 | 267  | 39  | 80.67  | 6.07  | 0.1  |
| chr2 | 165747338 | 165748742 | 1405 | 873  | 54  | 71.99  | 4.33  | 0.15 |
| chr2 | 165773065 | 165773888 | 824  | 292  | 30  | 73.89  | 5.84  | 0.13 |
| chr2 | 165807908 | 165809051 | 1144 | 764  | 46  | 93.74  | 5.98  | 0.07 |
| chr2 | 165817639 | 165819660 | 2022 | 578  | 115 | 320.98 | 8.76  | 0    |
| chr2 | 166005839 | 166007223 | 1385 | 876  | 61  | 161.26 | 7.61  | 0.11 |
| chr2 | 166271712 | 166272657 | 946  | 453  | 36  | 79.55  | 6.52  | 0.1  |
| chr2 | 166535094 | 166535982 | 889  | 432  | 35  | 80.32  | 4.94  | 0.1  |
| chr2 | 166537565 | 166539917 | 2353 | 1285 | 107 | 253.22 | 7.36  | 0    |
| chr2 | 166630671 | 166631970 | 1300 | 435  | 56  | 156.36 | 6.81  | 0.11 |
| chr2 | 166840245 | 166841322 | 1078 | 572  | 42  | 82.83  | 5.63  | 0.11 |
| chr2 | 166887553 | 166889297 | 1745 | 1156 | 109 | 354.68 | 11.61 | 0    |

|      |           |           |      |      |     |        |       |      |
|------|-----------|-----------|------|------|-----|--------|-------|------|
| chr2 | 167246700 | 167247883 | 1184 | 660  | 61  | 158.22 | 9.78  | 0.11 |
| chr2 | 167317775 | 167319347 | 1573 | 527  | 70  | 131.3  | 5.29  | 0.08 |
| chr2 | 167413838 | 167415390 | 1553 | 696  | 89  | 159.25 | 5.71  | 0.11 |
| chr2 | 167456992 | 167458039 | 1048 | 571  | 56  | 145.69 | 7.77  | 0.09 |
| chr2 | 167481613 | 167482945 | 1333 | 989  | 75  | 145.5  | 5.56  | 0.09 |
| chr2 | 167485903 | 167487693 | 1791 | 488  | 81  | 240.7  | 9.23  | 0    |
| chr2 | 167513743 | 167518075 | 4333 | 746  | 217 | 430.92 | 8.09  | 0    |
| chr2 | 167602522 | 167603630 | 1109 | 732  | 61  | 141.25 | 6.93  | 0.09 |
| chr2 | 167757087 | 167758630 | 1544 | 845  | 85  | 232.51 | 8.76  | 0    |
| chr2 | 168032056 | 168033244 | 1189 | 512  | 66  | 195.09 | 8.79  | 0    |
| chr2 | 168055286 | 168056366 | 1081 | 594  | 48  | 171.16 | 11.27 | 0.06 |
| chr2 | 168415319 | 168416190 | 872  | 451  | 30  | 79.29  | 6.66  | 0.1  |
| chr2 | 168780314 | 168781553 | 1240 | 757  | 55  | 111.85 | 4.85  | 0.06 |
| chr2 | 169957678 | 169958682 | 1005 | 403  | 39  | 106.93 | 4.94  | 0.06 |
| chr2 | 173484756 | 173485990 | 1235 | 683  | 61  | 167.02 | 8.83  | 0.06 |
| chr2 | 173901146 | 173902105 | 960  | 529  | 46  | 106.49 | 6.15  | 0.06 |
| chr2 | 174152503 | 174153448 | 946  | 419  | 41  | 79.25  | 7.16  | 0.1  |
| chr2 | 174154905 | 174155623 | 719  | 321  | 24  | 70.47  | 5.7   | 0.16 |
| chr2 | 174262820 | 174265496 | 2677 | 573  | 138 | 169.49 | 5.25  | 0.06 |
| chr2 | 179711131 | 179712216 | 1086 | 524  | 74  | 280.21 | 13.97 | 0    |
| chr2 | 179758966 | 179760137 | 1172 | 711  | 46  | 109.85 | 7.69  | 0.06 |
| chr2 | 179776492 | 179777699 | 1208 | 724  | 69  | 173.79 | 7.49  | 0.07 |
| chr2 | 179804849 | 179805887 | 1039 | 488  | 61  | 90.29  | 6.88  | 0.07 |
| chr2 | 180436111 | 180437306 | 1196 | 704  | 49  | 115.21 | 6.55  | 0.06 |
| chr2 | 180444245 | 180445539 | 1295 | 522  | 58  | 186.42 | 9.15  | 0    |
| chr2 | 180701258 | 180702430 | 1173 | 643  | 50  | 116.21 | 6.62  | 0.07 |
| chr2 | 180921598 | 180922859 | 1262 | 921  | 53  | 124.48 | 6.05  | 0.07 |
| chr2 | 181021842 | 181023395 | 1554 | 895  | 83  | 147.17 | 6.32  | 0.09 |
| chr2 | 181099259 | 181100880 | 1622 | 789  | 82  | 140.24 | 5.74  | 0.09 |
| chr2 | 181231547 | 181232691 | 1145 | 384  | 51  | 70.46  | 5.56  | 0.16 |
| chr2 | 181253913 | 181255758 | 1846 | 1164 | 100 | 169.77 | 7.36  | 0.06 |
| chr2 | 181315483 | 181317076 | 1594 | 1160 | 65  | 147.25 | 6.93  | 0.1  |
| chr2 | 181327440 | 181328341 | 902  | 417  | 37  | 96.21  | 6.47  | 0.08 |
| chr2 | 181332903 | 181334271 | 1369 | 689  | 64  | 152.52 | 6.28  | 0.1  |
| chr2 | 181414410 | 181415493 | 1084 | 452  | 50  | 160.74 | 9.39  | 0.11 |
| chr2 | 181427660 | 181429192 | 1533 | 904  | 90  | 200.33 | 8.9   | 0    |
| chr2 | 181572177 | 181572864 | 688  | 461  | 30  | 109.61 | 10.63 | 0.06 |
| chr2 | 181651913 | 181652931 | 1019 | 272  | 137 | 156.45 | 5.5   | 0.11 |
| chr3 | 5575561   | 5576721   | 1161 | 310  | 55  | 104.24 | 4.91  | 0.06 |
| chr3 | 5860464   | 5860975   | 512  | 210  | 144 | 280.84 | 5.61  | 0    |
| chr3 | 8923078   | 8924391   | 1314 | 743  | 73  | 139.32 | 6.83  | 0.09 |
| chr3 | 9003703   | 9004994   | 1292 | 992  | 50  | 121.14 | 5.85  | 0.07 |
| chr3 | 10011913  | 10014076  | 2164 | 809  | 112 | 183.84 | 4.55  | 0    |
| chr3 | 10017055  | 10018578  | 1524 | 485  | 58  | 98.59  | 7.75  | 0.08 |

|      |          |          |      |      |     |        |       |      |
|------|----------|----------|------|------|-----|--------|-------|------|
| chr3 | 14610639 | 14611754 | 1116 | 707  | 49  | 111.93 | 6.33  | 0.06 |
| chr3 | 16082715 | 16084058 | 1344 | 633  | 71  | 138.8  | 6.47  | 0.09 |
| chr3 | 16084083 | 16085096 | 1014 | 662  | 37  | 84.98  | 5.78  | 0.07 |
| chr3 | 19062604 | 19063593 | 990  | 390  | 36  | 86.12  | 5.96  | 0.07 |
| chr3 | 19527642 | 19529467 | 1826 | 1358 | 77  | 95.76  | 4.96  | 0.08 |
| chr3 | 20054603 | 20055450 | 848  | 451  | 28  | 76.66  | 8.09  | 0.12 |
| chr3 | 21974679 | 21976775 | 2097 | 1654 | 84  | 218.79 | 8.45  | 0    |
| chr3 | 27081545 | 27083411 | 1867 | 623  | 93  | 200.53 | 5.6   | 0    |
| chr3 | 27092028 | 27093556 | 1529 | 624  | 80  | 137.73 | 5.31  | 0.09 |
| chr3 | 27157423 | 27158024 | 602  | 195  | 26  | 92.57  | 9.25  | 0.07 |
| chr3 | 27609633 | 27610449 | 817  | 479  | 33  | 97     | 8.09  | 0.08 |
| chr3 | 30499808 | 30500645 | 838  | 404  | 45  | 115    | 9.34  | 0.06 |
| chr3 | 30691616 | 30692736 | 1121 | 496  | 59  | 174.34 | 9.19  | 0.07 |
| chr3 | 30991988 | 30993308 | 1321 | 804  | 56  | 150.6  | 6.71  | 0.1  |
| chr3 | 30993421 | 30994965 | 1545 | 1161 | 64  | 122.77 | 6.41  | 0.07 |
| chr3 | 32295289 | 32296376 | 1088 | 530  | 55  | 98.46  | 5.48  | 0.08 |
| chr3 | 32296384 | 32297125 | 742  | 417  | 28  | 70.42  | 6.19  | 0.16 |
| chr3 | 32607024 | 32608171 | 1148 | 585  | 58  | 103.03 | 5.48  | 0.06 |
| chr3 | 33698379 | 33699603 | 1225 | 663  | 58  | 227.26 | 9.71  | 0    |
| chr3 | 33918209 | 33919413 | 1205 | 331  | 46  | 148.91 | 9.17  | 0.1  |
| chr3 | 33979767 | 33980715 | 949  | 422  | 38  | 108.45 | 10.34 | 0.06 |
| chr3 | 36373701 | 36375216 | 1516 | 1186 | 69  | 112.85 | 5.02  | 0.06 |
| chr3 | 40886410 | 40887732 | 1323 | 913  | 61  | 87.34  | 4.8   | 0.07 |
| chr3 | 41369504 | 41370441 | 938  | 510  | 45  | 144.79 | 9.79  | 0.09 |
| chr3 | 41545786 | 41546928 | 1143 | 712  | 49  | 146.66 | 8.99  | 0.09 |
| chr3 | 51079527 | 51081816 | 2290 | 1824 | 91  | 193.16 | 7.32  | 0    |
| chr3 | 51136868 | 51137939 | 1072 | 548  | 51  | 98.24  | 5.49  | 0.08 |
| chr3 | 51143542 | 51145214 | 1673 | 1122 | 88  | 366.98 | 12.32 | 0    |
| chr3 | 51219250 | 51221019 | 1770 | 1274 | 76  | 233.76 | 7.61  | 0    |
| chr3 | 51287216 | 51288695 | 1480 | 526  | 81  | 142.5  | 5.64  | 0.09 |
| chr3 | 51873332 | 51874656 | 1325 | 551  | 82  | 254.89 | 13.4  | 0    |
| chr3 | 51906101 | 51907274 | 1174 | 459  | 55  | 134.97 | 5.98  | 0.08 |
| chr3 | 52071803 | 52072551 | 749  | 518  | 26  | 71.24  | 6.19  | 0.15 |
| chr3 | 52820593 | 52821413 | 821  | 440  | 30  | 74.42  | 8.52  | 0.13 |
| chr3 | 53266686 | 53268170 | 1485 | 502  | 68  | 126.15 | 5.99  | 0.07 |
| chr3 | 53667327 | 53668215 | 889  | 604  | 48  | 128.57 | 6.8   | 0.08 |
| chr3 | 54496234 | 54497235 | 1002 | 441  | 44  | 81.01  | 5.99  | 0.1  |
| chr3 | 54538474 | 54539450 | 977  | 481  | 48  | 92.83  | 6.7   | 0.07 |
| chr3 | 54915600 | 54916904 | 1305 | 468  | 60  | 120.19 | 7.47  | 0.07 |
| chr3 | 57539331 | 57541300 | 1970 | 596  | 88  | 153.01 | 5.09  | 0.1  |
| chr3 | 58218105 | 58221625 | 3521 | 627  | 175 | 335.84 | 8.55  | 0    |
| chr3 | 58328888 | 58330084 | 1197 | 734  | 53  | 153.57 | 8.52  | 0.1  |
| chr3 | 58380147 | 58381062 | 916  | 476  | 44  | 142.11 | 8.94  | 0.09 |
| chr3 | 58495285 | 58496582 | 1298 | 596  | 58  | 222.35 | 10.4  | 0    |

|      |          |          |      |      |     |        |      |      |
|------|----------|----------|------|------|-----|--------|------|------|
| chr3 | 60276406 | 60278919 | 2514 | 291  | 100 | 202.08 | 5.15 | 0    |
| chr3 | 60304745 | 60306051 | 1307 | 485  | 52  | 142.9  | 9.04 | 0.09 |
| chr3 | 61166690 | 61169889 | 3200 | 1802 | 190 | 411.81 | 8.9  | 0    |
| chr3 | 63779670 | 63780681 | 1012 | 533  | 41  | 133.67 | 7.59 | 0.08 |
| chr3 | 65331271 | 65332849 | 1579 | 781  | 79  | 183.1  | 6.8  | 0    |
| chr3 | 65332956 | 65334030 | 1075 | 496  | 41  | 102.32 | 5.96 | 0.05 |
| chr3 | 65462472 | 65463746 | 1275 | 396  | 68  | 201.54 | 7.36 | 0    |
| chr3 | 65469679 | 65470626 | 948  | 384  | 46  | 108.28 | 6.8  | 0.06 |
| chr3 | 65761528 | 65763001 | 1474 | 669  | 94  | 222.97 | 8.61 | 0    |
| chr3 | 65778199 | 65779894 | 1696 | 240  | 80  | 136.57 | 5.86 | 0.08 |
| chr3 | 67386164 | 67387380 | 1217 | 578  | 56  | 76.45  | 4.9  | 0.12 |
| chr3 | 68808048 | 68809486 | 1439 | 479  | 59  | 105.62 | 4.53 | 0.06 |
| chr3 | 68930419 | 68931645 | 1227 | 853  | 57  | 78.99  | 4.41 | 0.1  |
| chr3 | 75760365 | 75761202 | 838  | 495  | 37  | 70.69  | 5.09 | 0.16 |
| chr3 | 79090211 | 79091728 | 1518 | 478  | 68  | 216.57 | 7.95 | 0    |
| chr3 | 79370292 | 79372405 | 2114 | 1685 | 94  | 142.96 | 5.02 | 0.09 |
| chr3 | 79646179 | 79646998 | 820  | 262  | 30  | 86.08  | 6.62 | 0.07 |
| chr3 | 83843272 | 83844410 | 1139 | 643  | 47  | 138.84 | 8.27 | 0.09 |
| chr3 | 84386203 | 84387215 | 1013 | 314  | 36  | 89.63  | 5.39 | 0.07 |
| chr3 | 84617729 | 84619019 | 1291 | 771  | 78  | 167.16 | 7.84 | 0.06 |
| chr3 | 84619126 | 84619795 | 670  | 497  | 26  | 76.31  | 5.87 | 0.12 |
| chr3 | 85945860 | 85947154 | 1295 | 575  | 72  | 151.41 | 6.47 | 0.1  |
| chr3 | 87328914 | 87330394 | 1481 | 613  | 72  | 145.26 | 6.29 | 0.09 |
| chr3 | 87420846 | 87422058 | 1213 | 732  | 43  | 96.89  | 7.24 | 0.08 |
| chr3 | 87709640 | 87710768 | 1129 | 548  | 60  | 208.91 | 8.52 | 0    |
| chr3 | 87733622 | 87734922 | 1301 | 502  | 68  | 152.74 | 8.39 | 0.1  |
| chr3 | 87885490 | 87886243 | 754  | 457  | 31  | 88.24  | 6.81 | 0.07 |
| chr3 | 87906185 | 87907367 | 1183 | 785  | 49  | 75.98  | 4.05 | 0.14 |
| chr3 | 87941805 | 87943297 | 1493 | 998  | 108 | 360.5  | 9.34 | 0    |
| chr3 | 87943956 | 87946994 | 3039 | 1599 | 135 | 315.12 | 7.15 | 0    |
| chr3 | 88100045 | 88101379 | 1335 | 825  | 65  | 132.79 | 5.39 | 0.08 |
| chr3 | 88139700 | 88140610 | 911  | 534  | 48  | 76.94  | 4.62 | 0.12 |
| chr3 | 88296397 | 88297592 | 1196 | 626  | 59  | 117.78 | 5.78 | 0.07 |
| chr3 | 88306658 | 88307815 | 1158 | 535  | 56  | 103.57 | 6.7  | 0.06 |
| chr3 | 88335209 | 88336099 | 891  | 468  | 32  | 82.23  | 6.74 | 0.1  |
| chr3 | 88356005 | 88358497 | 2493 | 1578 | 120 | 282.41 | 7.65 | 0    |
| chr3 | 88410991 | 88411667 | 677  | 198  | 27  | 71.4   | 6.07 | 0.15 |
| chr3 | 88424453 | 88426919 | 2467 | 673  | 129 | 306.73 | 8.74 | 0    |
| chr3 | 88489036 | 88490441 | 1406 | 751  | 71  | 129.59 | 5.66 | 0.08 |
| chr3 | 88717275 | 88718674 | 1400 | 604  | 82  | 253.18 | 7.74 | 0    |
| chr3 | 88968240 | 88969262 | 1023 | 486  | 39  | 91.69  | 9.3  | 0.07 |
| chr3 | 88980819 | 88981935 | 1117 | 526  | 66  | 159.09 | 9.49 | 0.11 |
| chr3 | 88999875 | 89000807 | 933  | 361  | 40  | 130.23 | 9.04 | 0.08 |
| chr3 | 89006481 | 89007235 | 755  | 413  | 25  | 82.01  | 8.16 | 0.1  |

|      |          |          |      |      |     |        |       |      |
|------|----------|----------|------|------|-----|--------|-------|------|
| chr3 | 89195128 | 89196625 | 1498 | 1195 | 62  | 138.82 | 6.93  | 0.09 |
| chr3 | 89196632 | 89198628 | 1997 | 955  | 98  | 156.88 | 5.48  | 0.11 |
| chr3 | 89215401 | 89216423 | 1023 | 451  | 39  | 70.61  | 4.38  | 0.16 |
| chr3 | 89221939 | 89222975 | 1037 | 318  | 48  | 161.05 | 9.71  | 0.11 |
| chr3 | 89576500 | 89578716 | 2217 | 803  | 116 | 327.33 | 8.97  | 0    |
| chr3 | 89716017 | 89717631 | 1615 | 1140 | 88  | 202.07 | 6.83  | 0    |
| chr3 | 89855791 | 89856953 | 1163 | 713  | 50  | 132.57 | 5.66  | 0.08 |
| chr3 | 89883041 | 89884861 | 1821 | 495  | 92  | 132.58 | 4.52  | 0.08 |
| chr3 | 90016959 | 90018222 | 1264 | 577  | 82  | 200.86 | 9.66  | 0    |
| chr3 | 90024157 | 90025158 | 1002 | 483  | 40  | 132.23 | 9.85  | 0.08 |
| chr3 | 90035054 | 90036143 | 1090 | 549  | 50  | 127.7  | 8.46  | 0.07 |
| chr3 | 90051381 | 90052592 | 1212 | 504  | 53  | 151.4  | 8.94  | 0.1  |
| chr3 | 90068167 | 90070979 | 2813 | 1398 | 149 | 339.64 | 5.91  | 0    |
| chr3 | 90096012 | 90098061 | 2050 | 989  | 82  | 122.9  | 5.39  | 0.07 |
| chr3 | 90236434 | 90238103 | 1670 | 1040 | 80  | 112.14 | 5.64  | 0.06 |
| chr3 | 90279447 | 90280592 | 1146 | 373  | 73  | 176.32 | 9.4   | 0.07 |
| chr3 | 90294328 | 90295344 | 1017 | 604  | 52  | 176.25 | 11.07 | 0.07 |
| chr3 | 90312612 | 90313965 | 1354 | 836  | 56  | 139.82 | 7.28  | 0.09 |
| chr3 | 94385716 | 94387153 | 1438 | 957  | 63  | 103.65 | 4.91  | 0.06 |
| chr3 | 94624871 | 94625719 | 849  | 449  | 30  | 76.37  | 9.44  | 0.12 |
| chr3 | 94641915 | 94642657 | 743  | 351  | 29  | 101.65 | 8.09  | 0.08 |
| chr3 | 94757545 | 94758473 | 929  | 476  | 33  | 72.46  | 6.07  | 0.15 |
| chr3 | 94778324 | 94779605 | 1282 | 825  | 57  | 175.05 | 7.64  | 0.07 |
| chr3 | 94818860 | 94820539 | 1680 | 627  | 84  | 193.57 | 6.8   | 0    |
| chr3 | 94845882 | 94846959 | 1078 | 504  | 43  | 77.12  | 6.47  | 0.12 |
| chr3 | 94937129 | 94938097 | 969  | 339  | 40  | 76.53  | 4.85  | 0.12 |
| chr3 | 94943321 | 94944637 | 1317 | 414  | 47  | 101.37 | 6.42  | 0.08 |
| chr3 | 94945131 | 94946739 | 1609 | 462  | 71  | 81.14  | 4.52  | 0.1  |
| chr3 | 95020959 | 95022267 | 1309 | 558  | 73  | 177.5  | 7.79  | 0.07 |
| chr3 | 95031788 | 95033562 | 1775 | 781  | 94  | 231.57 | 7.77  | 0    |
| chr3 | 95084511 | 95088263 | 3753 | 791  | 171 | 455    | 6.15  | 0    |
| chr3 | 95116196 | 95117105 | 910  | 462  | 35  | 84.62  | 6.47  | 0.06 |
| chr3 | 95118548 | 95120080 | 1533 | 785  | 79  | 234.74 | 8.09  | 0    |
| chr3 | 95237825 | 95239111 | 1287 | 748  | 58  | 100.99 | 5.2   | 0.08 |
| chr3 | 95322548 | 95323488 | 941  | 529  | 35  | 75.78  | 6.55  | 0.13 |
| chr3 | 95327346 | 95328435 | 1090 | 594  | 41  | 87.94  | 6.16  | 0.07 |
| chr3 | 95330253 | 95331814 | 1562 | 530  | 81  | 265    | 9.22  | 0    |
| chr3 | 95392210 | 95393131 | 922  | 364  | 36  | 132.35 | 8.74  | 0.08 |
| chr3 | 95428441 | 95429672 | 1232 | 198  | 43  | 70.16  | 4.38  | 0.16 |
| chr3 | 95454195 | 95455922 | 1728 | 1169 | 84  | 186.34 | 5.5   | 0    |
| chr3 | 95461975 | 95464557 | 2583 | 681  | 181 | 466.33 | 9.61  | 0    |
| chr3 | 95464573 | 95469711 | 5139 | 550  | 260 | 413.22 | 6     | 0    |
| chr3 | 95477359 | 95478892 | 1534 | 454  | 60  | 103.35 | 6.3   | 0.06 |
| chr3 | 95621722 | 95624164 | 2443 | 1137 | 146 | 370.91 | 9.29  | 0    |

|      |           |           |      |      |     |        |       |      |
|------|-----------|-----------|------|------|-----|--------|-------|------|
| chr3 | 95674958  | 95675889  | 932  | 500  | 40  | 147.61 | 9.7   | 0.1  |
| chr3 | 95797187  | 95800755  | 3569 | 1410 | 220 | 598.49 | 8.4   | 0    |
| chr3 | 95908056  | 95909108  | 1053 | 623  | 39  | 94.41  | 5.54  | 0.07 |
| chr3 | 95975675  | 95976911  | 1237 | 675  | 64  | 166.12 | 6.74  | 0.06 |
| chr3 | 96022844  | 96026027  | 3184 | 1365 | 182 | 682.14 | 10.85 | 0    |
| chr3 | 96048517  | 96049383  | 867  | 498  | 39  | 114.9  | 9.08  | 0.06 |
| chr3 | 96065727  | 96067959  | 2233 | 1507 | 129 | 338.82 | 7.92  | 0    |
| chr3 | 96072112  | 96072810  | 699  | 503  | 36  | 109.61 | 6.62  | 0.06 |
| chr3 | 96072856  | 96074209  | 1354 | 377  | 72  | 110.86 | 4.39  | 0.06 |
| chr3 | 96104390  | 96105341  | 952  | 725  | 44  | 70.39  | 4.7   | 0.16 |
| chr3 | 96303055  | 96306016  | 2962 | 2423 | 186 | 520.09 | 12.14 | 0    |
| chr3 | 96360594  | 96364347  | 3754 | 1331 | 231 | 571.57 | 8.96  | 0    |
| chr3 | 96364544  | 96367003  | 2460 | 1921 | 116 | 245.87 | 6.47  | 0    |
| chr3 | 96368203  | 96369333  | 1131 | 553  | 54  | 116.99 | 8.09  | 0.07 |
| chr3 | 96439031  | 96439884  | 854  | 584  | 44  | 124.3  | 5.98  | 0.07 |
| chr3 | 96500002  | 96501535  | 1534 | 864  | 73  | 259.89 | 9.37  | 0    |
| chr3 | 96530915  | 96532230  | 1316 | 760  | 62  | 143.19 | 5.39  | 0.09 |
| chr3 | 96962477  | 96963169  | 693  | 259  | 24  | 73.44  | 7.26  | 0.13 |
| chr3 | 97413554  | 97414598  | 1045 | 659  | 42  | 136.32 | 9.16  | 0.08 |
| chr3 | 97816984  | 97818088  | 1105 | 380  | 60  | 130.39 | 7.25  | 0.08 |
| chr3 | 100488823 | 100490229 | 1407 | 573  | 68  | 224.97 | 10.79 | 0    |
| chr3 | 101407536 | 101409108 | 1573 | 670  | 82  | 199.94 | 7.44  | 0    |
| chr3 | 102823825 | 102825209 | 1385 | 442  | 62  | 79.05  | 4.41  | 0.1  |
| chr3 | 102861726 | 102862823 | 1098 | 578  | 59  | 274.85 | 19.81 | 0    |
| chr3 | 103082737 | 103084097 | 1361 | 410  | 62  | 144.9  | 6.68  | 0.09 |
| chr3 | 103594845 | 103596161 | 1317 | 520  | 68  | 166.35 | 7.77  | 0.06 |
| chr3 | 103717770 | 103719003 | 1234 | 592  | 63  | 198.79 | 12.14 | 0    |
| chr3 | 103771522 | 103772740 | 1219 | 585  | 54  | 109.86 | 5.5   | 0.06 |
| chr3 | 104024034 | 104024750 | 717  | 319  | 24  | 73.42  | 7.51  | 0.13 |
| chr3 | 104315020 | 104316253 | 1234 | 725  | 55  | 126.46 | 7.04  | 0.07 |
| chr3 | 104442068 | 104442880 | 813  | 424  | 31  | 98.81  | 8.63  | 0.08 |
| chr3 | 104666502 | 104668451 | 1950 | 756  | 118 | 307.67 | 6.59  | 0    |
| chr3 | 104849337 | 104851170 | 1834 | 1323 | 81  | 131.26 | 5.2   | 0.08 |
| chr3 | 104854817 | 104856610 | 1794 | 1019 | 89  | 280.86 | 9.79  | 0    |
| chr3 | 105697386 | 105698860 | 1475 | 457  | 63  | 105.55 | 4.79  | 0.06 |
| chr3 | 105761590 | 105762612 | 1023 | 237  | 45  | 82.78  | 4.79  | 0.11 |
| chr3 | 106349980 | 106351222 | 1243 | 657  | 55  | 78.61  | 4.44  | 0.12 |
| chr3 | 106524115 | 106525532 | 1418 | 495  | 71  | 71.1   | 3.35  | 0.16 |
| chr3 | 106590798 | 106591885 | 1088 | 793  | 36  | 103.29 | 7.06  | 0.06 |
| chr3 | 107081641 | 107082499 | 859  | 323  | 33  | 120.7  | 11.07 | 0.07 |
| chr3 | 107135558 | 107137678 | 2121 | 1084 | 110 | 139.49 | 4.59  | 0.09 |
| chr3 | 107434088 | 107435040 | 953  | 442  | 35  | 85.18  | 5.96  | 0.07 |
| chr3 | 107948576 | 107949560 | 985  | 505  | 46  | 114.76 | 9.15  | 0.06 |
| chr3 | 108002878 | 108004031 | 1154 | 807  | 54  | 80.82  | 4.55  | 0.1  |

|      |           |           |      |      |     |        |       |      |
|------|-----------|-----------|------|------|-----|--------|-------|------|
| chr3 | 108012839 | 108014077 | 1239 | 483  | 67  | 167    | 6.27  | 0.06 |
| chr3 | 108357079 | 108357954 | 876  | 554  | 59  | 162.03 | 8.9   | 0.11 |
| chr3 | 108374175 | 108375237 | 1063 | 488  | 61  | 108.7  | 7.4   | 0.06 |
| chr3 | 108393597 | 108394636 | 1040 | 468  | 44  | 123.44 | 8.09  | 0.07 |
| chr3 | 108642806 | 108643906 | 1101 | 555  | 46  | 77.71  | 5.09  | 0.12 |
| chr3 | 108714128 | 108715224 | 1097 | 541  | 61  | 143.3  | 6.93  | 0.09 |
| chr3 | 108830270 | 108830998 | 729  | 330  | 25  | 71.46  | 6.95  | 0.15 |
| chr3 | 109143459 | 109144447 | 989  | 478  | 38  | 100.63 | 6.6   | 0.08 |
| chr3 | 113332415 | 113333681 | 1267 | 602  | 67  | 131.97 | 7.28  | 0.08 |
| chr3 | 115416880 | 115418342 | 1463 | 820  | 62  | 158    | 6.88  | 0.11 |
| chr3 | 115590483 | 115591625 | 1143 | 625  | 51  | 118.46 | 6.33  | 0.07 |
| chr3 | 115709787 | 115710829 | 1043 | 609  | 41  | 129.46 | 8.09  | 0.08 |
| chr3 | 116364635 | 116366074 | 1440 | 857  | 65  | 228.29 | 9.16  | 0    |
| chr3 | 116510851 | 116512052 | 1202 | 779  | 56  | 78.23  | 4.66  | 0.12 |
| chr3 | 116564159 | 116565136 | 978  | 509  | 47  | 92.95  | 7.22  | 0.07 |
| chr3 | 117571379 | 117572486 | 1108 | 554  | 58  | 264.84 | 14.56 | 0    |
| chr3 | 121948207 | 121949227 | 1021 | 442  | 46  | 155.31 | 12.85 | 0.11 |
| chr3 | 121995419 | 121996794 | 1376 | 540  | 73  | 166.22 | 7.49  | 0.06 |
| chr3 | 122122529 | 122123399 | 871  | 355  | 32  | 73.94  | 6.07  | 0.13 |
| chr3 | 122687098 | 122688069 | 972  | 523  | 35  | 77.52  | 7.69  | 0.12 |
| chr3 | 123088425 | 123089375 | 951  | 447  | 33  | 93.28  | 8.6   | 0.07 |
| chr3 | 123210855 | 123212276 | 1422 | 388  | 77  | 140.53 | 7.33  | 0.09 |
| chr3 | 126298860 | 126300733 | 1874 | 1406 | 84  | 147.5  | 5.99  | 0.1  |
| chr3 | 127492299 | 127494351 | 2053 | 611  | 101 | 180.63 | 7.81  | 0    |
| chr3 | 129672129 | 129673478 | 1350 | 925  | 53  | 78.76  | 5.39  | 0.12 |
| chr3 | 129763347 | 129764225 | 879  | 317  | 40  | 129.04 | 7.56  | 0.08 |
| chr3 | 130411463 | 130412809 | 1347 | 835  | 55  | 175.51 | 9.61  | 0.07 |
| chr3 | 130432482 | 130434006 | 1525 | 813  | 89  | 259.7  | 10.45 | 0    |
| chr3 | 132346436 | 132347518 | 1083 | 517  | 52  | 73.54  | 4.05  | 0.13 |
| chr3 | 132754121 | 132755593 | 1473 | 605  | 76  | 135.32 | 5.74  | 0.08 |
| chr3 | 133206871 | 133207449 | 579  | 302  | 21  | 74.13  | 7.76  | 0.13 |
| chr3 | 135085568 | 135086832 | 1265 | 443  | 51  | 74.93  | 4.33  | 0.13 |
| chr3 | 135100439 | 135102787 | 2349 | 866  | 136 | 317.65 | 7.22  | 0    |
| chr3 | 135354251 | 135355032 | 782  | 486  | 30  | 84.34  | 5.39  | 0.06 |
| chr3 | 136332118 | 136334157 | 2040 | 692  | 102 | 72.06  | 3.34  | 0.15 |
| chr3 | 137530338 | 137531152 | 815  | 209  | 36  | 77.32  | 4.85  | 0.12 |
| chr3 | 137806098 | 137807416 | 1319 | 779  | 75  | 169.88 | 5.58  | 0.06 |
| chr3 | 142427527 | 142428822 | 1296 | 688  | 79  | 293.47 | 13.35 | 0    |
| chr3 | 142544474 | 142545615 | 1142 | 422  | 59  | 227.43 | 10.21 | 0    |
| chr3 | 143867195 | 143868992 | 1798 | 890  | 83  | 262.73 | 8.23  | 0    |
| chr3 | 144232579 | 144234168 | 1590 | 1052 | 78  | 176.27 | 8.09  | 0.07 |
| chr3 | 144381789 | 144382930 | 1142 | 665  | 51  | 80.02  | 6.42  | 0.1  |
| chr3 | 144780853 | 144782461 | 1609 | 1088 | 75  | 133.77 | 8.09  | 0.08 |
| chr3 | 145586385 | 145588082 | 1698 | 914  | 92  | 165.31 | 6.32  | 0.06 |

|      |           |           |      |      |     |        |       |      |
|------|-----------|-----------|------|------|-----|--------|-------|------|
| chr3 | 145600582 | 145601574 | 993  | 442  | 45  | 162.69 | 11.12 | 0.12 |
| chr3 | 145626840 | 145627550 | 711  | 400  | 31  | 79.41  | 6.62  | 0.1  |
| chr3 | 146162186 | 146163497 | 1312 | 1018 | 52  | 151.04 | 6.66  | 0.1  |
| chr3 | 146183802 | 146184682 | 881  | 478  | 38  | 87.77  | 6.68  | 0.07 |
| chr3 | 146475520 | 146476585 | 1066 | 541  | 60  | 124.87 | 7.31  | 0.07 |
| chr3 | 148651570 | 148652807 | 1238 | 416  | 51  | 136.34 | 7.24  | 0.08 |
| chr3 | 151855418 | 151857262 | 1845 | 446  | 68  | 135.78 | 6.72  | 0.08 |
| chr3 | 151872259 | 151874337 | 2079 | 1232 | 125 | 404.4  | 9.51  | 0    |
| chr3 | 152008994 | 152010287 | 1294 | 901  | 54  | 174    | 9.97  | 0.07 |
| chr3 | 152058371 | 152059849 | 1479 | 1055 | 76  | 261.2  | 12.82 | 0    |
| chr3 | 152140442 | 152141486 | 1045 | 399  | 39  | 77.99  | 4.05  | 0.12 |
| chr3 | 153575157 | 153576538 | 1382 | 859  | 74  | 188.18 | 8.09  | 0    |
| chr3 | 153606868 | 153608094 | 1227 | 713  | 70  | 96.54  | 5.66  | 0.08 |
| chr3 | 154259315 | 154260511 | 1197 | 743  | 53  | 196.46 | 9.71  | 0    |
| chr3 | 157196757 | 157197982 | 1226 | 448  | 66  | 86.25  | 5.6   | 0.07 |
| chr3 | 157609647 | 157610664 | 1018 | 270  | 57  | 199.46 | 9.71  | 0    |
| chr3 | 157699001 | 157700055 | 1055 | 526  | 53  | 110.03 | 8.38  | 0.06 |
| chr4 | 3501389   | 3502503   | 1115 | 611  | 48  | 70.8   | 5.12  | 0.16 |
| chr4 | 3762184   | 3763230   | 1047 | 512  | 52  | 82.28  | 5.88  | 0.1  |
| chr4 | 4719904   | 4720903   | 1000 | 444  | 41  | 77.32  | 7.12  | 0.12 |
| chr4 | 6292273   | 6293919   | 1647 | 971  | 98  | 334.89 | 9.25  | 0    |
| chr4 | 6380729   | 6381389   | 661  | 427  | 22  | 74.22  | 7.57  | 0.13 |
| chr4 | 8462251   | 8463327   | 1077 | 604  | 43  | 133.72 | 11.35 | 0.08 |
| chr4 | 8573833   | 8575262   | 1430 | 933  | 68  | 210.2  | 9     | 0    |
| chr4 | 9595654   | 9597331   | 1678 | 512  | 69  | 108.42 | 5.49  | 0.06 |
| chr4 | 10800728  | 10801939  | 1212 | 551  | 72  | 358.5  | 17.48 | 0    |
| chr4 | 10934229  | 10935694  | 1466 | 833  | 91  | 183.48 | 7.14  | 0    |
| chr4 | 11082885  | 11084071  | 1187 | 469  | 67  | 126.13 | 7.36  | 0.07 |
| chr4 | 11117966  | 11118697  | 732  | 532  | 28  | 90.43  | 7.08  | 0.07 |
| chr4 | 11180856  | 11181774  | 919  | 339  | 42  | 129.25 | 9.37  | 0.08 |
| chr4 | 11248854  | 11249915  | 1062 | 563  | 53  | 174.91 | 12.35 | 0.07 |
| chr4 | 11412525  | 11413660  | 1136 | 683  | 57  | 123.28 | 6.89  | 0.07 |
| chr4 | 14753201  | 14754106  | 906  | 370  | 38  | 79.66  | 6.07  | 0.1  |
| chr4 | 15884884  | 15885979  | 1096 | 628  | 45  | 147.28 | 9.61  | 0.1  |
| chr4 | 15940439  | 15941394  | 956  | 466  | 39  | 78.22  | 6.07  | 0.12 |
| chr4 | 16090202  | 16091672  | 1471 | 703  | 69  | 148.25 | 5.5   | 0.1  |
| chr4 | 19501942  | 19503023  | 1082 | 488  | 48  | 99.35  | 6.47  | 0.08 |
| chr4 | 19633687  | 19636844  | 3158 | 1032 | 163 | 397.35 | 9.1   | 0    |
| chr4 | 19783115  | 19783982  | 868  | 448  | 32  | 94.03  | 7.85  | 0.07 |
| chr4 | 19800556  | 19801530  | 975  | 530  | 35  | 74.08  | 5.5   | 0.13 |
| chr4 | 19821815  | 19822859  | 1045 | 571  | 41  | 76.95  | 6.07  | 0.12 |
| chr4 | 21654254  | 21655344  | 1091 | 640  | 43  | 85.95  | 5.63  | 0.07 |
| chr4 | 21703063  | 21703875  | 813  | 350  | 28  | 73.82  | 7.52  | 0.13 |
| chr4 | 21774222  | 21775714  | 1493 | 848  | 70  | 80.75  | 4.05  | 0.1  |

|      |          |          |      |      |     |        |       |      |
|------|----------|----------|------|------|-----|--------|-------|------|
| chr4 | 21806431 | 21807544 | 1114 | 474  | 46  | 97.37  | 5.63  | 0.08 |
| chr4 | 22284073 | 22285714 | 1642 | 979  | 87  | 294.46 | 10.22 | 0    |
| chr4 | 25208470 | 25209405 | 936  | 473  | 44  | 72.48  | 6.27  | 0.15 |
| chr4 | 32050432 | 32051421 | 990  | 632  | 48  | 146.82 | 7.69  | 0.09 |
| chr4 | 32337127 | 32338349 | 1223 | 532  | 52  | 88.72  | 5.09  | 0.07 |
| chr4 | 32701822 | 32702701 | 880  | 519  | 48  | 158.06 | 8.09  | 0.11 |
| chr4 | 32743561 | 32744532 | 972  | 481  | 38  | 105.47 | 8.09  | 0.06 |
| chr4 | 32886702 | 32887765 | 1064 | 543  | 44  | 88.35  | 7.75  | 0.07 |
| chr4 | 33117693 | 33118864 | 1172 | 589  | 59  | 165.7  | 9.93  | 0.06 |
| chr4 | 33334020 | 33336233 | 2214 | 1690 | 135 | 337.28 | 7.22  | 0    |
| chr4 | 34497287 | 34498403 | 1117 | 537  | 49  | 93.91  | 7.47  | 0.07 |
| chr4 | 34561554 | 34562639 | 1086 | 536  | 47  | 126.49 | 8.5   | 0.07 |
| chr4 | 34634103 | 34635096 | 994  | 506  | 40  | 107.01 | 9.79  | 0.06 |
| chr4 | 34725288 | 34725978 | 691  | 259  | 36  | 116.68 | 11.17 | 0.07 |
| chr4 | 34829675 | 34830924 | 1250 | 476  | 56  | 81.63  | 5.74  | 0.1  |
| chr4 | 34833474 | 34834654 | 1181 | 727  | 45  | 133.12 | 7.94  | 0.08 |
| chr4 | 34882880 | 34883247 | 368  | 184  | 18  | 90.86  | 10.49 | 0.07 |
| chr4 | 35172118 | 35174019 | 1902 | 893  | 88  | 144.16 | 5.86  | 0.09 |
| chr4 | 40089857 | 40091048 | 1192 | 772  | 48  | 137.44 | 6.89  | 0.08 |
| chr4 | 40215296 | 40217352 | 2057 | 1672 | 92  | 175.63 | 6.35  | 0.07 |
| chr4 | 40225967 | 40226962 | 996  | 498  | 41  | 87.84  | 7.04  | 0.07 |
| chr4 | 40668718 | 40670789 | 2072 | 700  | 118 | 471.62 | 11.01 | 0    |
| chr4 | 40800376 | 40801657 | 1282 | 459  | 58  | 127.7  | 7.08  | 0.07 |
| chr4 | 40917424 | 40918362 | 939  | 453  | 44  | 84.61  | 5.78  | 0.06 |
| chr4 | 41081629 | 41083380 | 1752 | 507  | 81  | 238    | 8.52  | 0    |
| chr4 | 41260923 | 41262367 | 1445 | 526  | 63  | 96.46  | 4.45  | 0.08 |
| chr4 | 41295605 | 41296657 | 1053 | 505  | 44  | 89.7   | 6.74  | 0.07 |
| chr4 | 41411281 | 41412452 | 1172 | 721  | 67  | 112.12 | 5.39  | 0.06 |
| chr4 | 41660002 | 41661105 | 1104 | 416  | 45  | 136.93 | 7.61  | 0.08 |
| chr4 | 41669635 | 41670674 | 1040 | 506  | 45  | 121.69 | 11.73 | 0.07 |
| chr4 | 41687248 | 41688737 | 1490 | 649  | 82  | 98.49  | 4.74  | 0.08 |
| chr4 | 42962119 | 42963399 | 1281 | 495  | 64  | 94.3   | 4.52  | 0.07 |
| chr4 | 43012324 | 43014104 | 1781 | 1378 | 82  | 168.89 | 5.5   | 0.06 |
| chr4 | 43043890 | 43044831 | 942  | 477  | 36  | 75.49  | 6.25  | 0.13 |
| chr4 | 43051653 | 43053500 | 1848 | 1474 | 98  | 253.83 | 9.78  | 0    |
| chr4 | 43056474 | 43057878 | 1405 | 436  | 49  | 87.65  | 4.72  | 0.07 |
| chr4 | 43394074 | 43395311 | 1238 | 658  | 61  | 166.54 | 8.09  | 0.06 |
| chr4 | 43505260 | 43506667 | 1408 | 536  | 62  | 123.02 | 5.83  | 0.07 |
| chr4 | 43521052 | 43522031 | 980  | 542  | 56  | 190.72 | 14.26 | 0    |
| chr4 | 43572286 | 43573675 | 1390 | 1049 | 57  | 79.64  | 5.3   | 0.1  |
| chr4 | 43574521 | 43576010 | 1490 | 711  | 78  | 198.95 | 6.99  | 0    |
| chr4 | 43591059 | 43592412 | 1354 | 846  | 68  | 239.27 | 8.27  | 0    |
| chr4 | 43668599 | 43669769 | 1171 | 655  | 50  | 109.69 | 5.63  | 0.06 |
| chr4 | 44024772 | 44026208 | 1437 | 646  | 84  | 204.76 | 7.51  | 0    |

|      |          |          |      |      |     |        |       |      |
|------|----------|----------|------|------|-----|--------|-------|------|
| chr4 | 44180278 | 44181752 | 1475 | 1070 | 57  | 159.37 | 8.57  | 0.11 |
| chr4 | 44246682 | 44247951 | 1270 | 528  | 62  | 197.26 | 13.2  | 0    |
| chr4 | 44768705 | 44770187 | 1483 | 786  | 74  | 139.13 | 5.58  | 0.09 |
| chr4 | 45024164 | 45026132 | 1969 | 1234 | 114 | 109.2  | 4.13  | 0.06 |
| chr4 | 45120291 | 45121270 | 980  | 526  | 37  | 98.88  | 6.29  | 0.08 |
| chr4 | 45332774 | 45333961 | 1188 | 543  | 60  | 106.07 | 6.52  | 0.06 |
| chr4 | 45354486 | 45355716 | 1231 | 705  | 54  | 148.7  | 6.81  | 0.1  |
| chr4 | 45543315 | 45544548 | 1234 | 694  | 51  | 78.28  | 4.33  | 0.12 |
| chr4 | 46151087 | 46151915 | 829  | 461  | 46  | 140.59 | 9.85  | 0.09 |
| chr4 | 46401637 | 46402943 | 1307 | 658  | 58  | 82.67  | 4.7   | 0.11 |
| chr4 | 46463277 | 46464689 | 1413 | 405  | 52  | 158.71 | 6.97  | 0.11 |
| chr4 | 46547141 | 46548429 | 1289 | 803  | 52  | 76.25  | 4.05  | 0.12 |
| chr4 | 46662584 | 46663648 | 1065 | 598  | 44  | 73.5   | 5.09  | 0.13 |
| chr4 | 47364693 | 47366719 | 2027 | 1439 | 112 | 366.18 | 11.2  | 0    |
| chr4 | 47486798 | 47487923 | 1126 | 654  | 48  | 143.08 | 7.64  | 0.09 |
| chr4 | 48055479 | 48056783 | 1305 | 866  | 61  | 196.54 | 9.44  | 0    |
| chr4 | 48291907 | 48293585 | 1679 | 650  | 72  | 82.33  | 4.17  | 0.11 |
| chr4 | 49533220 | 49534482 | 1263 | 792  | 50  | 127.59 | 6.81  | 0.07 |
| chr4 | 52451468 | 52452368 | 901  | 452  | 38  | 101.83 | 6.88  | 0.05 |
| chr4 | 53024234 | 53025478 | 1245 | 552  | 66  | 194.75 | 8.83  | 0    |
| chr4 | 53171122 | 53173332 | 2211 | 1645 | 120 | 316.05 | 9.78  | 0    |
| chr4 | 53452456 | 53453516 | 1061 | 535  | 43  | 129    | 8.94  | 0.08 |
| chr4 | 55362277 | 55363999 | 1723 | 392  | 86  | 168.19 | 5.49  | 0.06 |
| chr4 | 55544935 | 55546594 | 1660 | 910  | 126 | 492.9  | 13.72 | 0    |
| chr4 | 55663643 | 55665027 | 1385 | 730  | 81  | 249.88 | 8.44  | 0    |
| chr4 | 56814571 | 56815667 | 1097 | 587  | 50  | 113.14 | 7.75  | 0.06 |
| chr4 | 57968506 | 57970338 | 1833 | 1023 | 110 | 248.78 | 6.2   | 0    |
| chr4 | 58925068 | 58926174 | 1107 | 741  | 37  | 102.42 | 5.99  | 0.06 |
| chr4 | 59450796 | 59451959 | 1164 | 486  | 45  | 92.67  | 4.78  | 0.07 |
| chr4 | 59560775 | 59562770 | 1996 | 1747 | 107 | 326.11 | 8.09  | 0    |
| chr4 | 62020888 | 62022300 | 1413 | 594  | 75  | 126.56 | 5.64  | 0.07 |
| chr4 | 62068442 | 62069989 | 1548 | 513  | 68  | 112.82 | 6.12  | 0.06 |
| chr4 | 62180824 | 62181444 | 621  | 287  | 27  | 88.66  | 8.99  | 0.07 |
| chr4 | 63062318 | 63064759 | 2442 | 1885 | 117 | 179.94 | 5.53  | 0    |
| chr4 | 66489100 | 66490233 | 1134 | 785  | 42  | 76.71  | 4.22  | 0.12 |
| chr4 | 71860933 | 71861962 | 1030 | 705  | 36  | 70.95  | 5.01  | 0.16 |
| chr4 | 73897244 | 73898425 | 1182 | 432  | 62  | 94.99  | 4.85  | 0.07 |
| chr4 | 74923733 | 74924548 | 816  | 370  | 30  | 91.84  | 9.61  | 0.07 |
| chr4 | 82505041 | 82505931 | 891  | 396  | 39  | 102.68 | 7.32  | 0.06 |
| chr4 | 83063229 | 83064179 | 951  | 423  | 53  | 152.95 | 8.76  | 0.1  |
| chr4 | 84529983 | 84530913 | 931  | 445  | 31  | 73.05  | 8.57  | 0.13 |
| chr4 | 86221083 | 86222162 | 1080 | 374  | 48  | 70.69  | 4.44  | 0.16 |
| chr4 | 86313374 | 86316399 | 3026 | 2478 | 145 | 401.72 | 9.63  | 0    |
| chr4 | 86357015 | 86359544 | 2530 | 2183 | 107 | 260.82 | 6.47  | 0    |

|      |           |           |      |      |     |        |       |      |
|------|-----------|-----------|------|------|-----|--------|-------|------|
| chr4 | 86394047  | 86395782  | 1736 | 554  | 85  | 180.18 | 7.78  | 0    |
| chr4 | 86502779  | 86503743  | 965  | 484  | 34  | 97.39  | 8.09  | 0.08 |
| chr4 | 88083893  | 88085121  | 1229 | 827  | 46  | 135.86 | 8.09  | 0.08 |
| chr4 | 93001221  | 93002804  | 1584 | 297  | 83  | 250.4  | 10.4  | 0    |
| chr4 | 94222961  | 94223882  | 922  | 551  | 58  | 248.67 | 15.28 | 0    |
| chr4 | 94645232  | 94646304  | 1073 | 438  | 51  | 83.51  | 4.96  | 0.06 |
| chr4 | 94717212  | 94719832  | 2621 | 1626 | 133 | 197.49 | 6.62  | 0    |
| chr4 | 97417536  | 97419336  | 1801 | 1252 | 90  | 218.99 | 7.79  | 0    |
| chr4 | 98049346  | 98050345  | 1000 | 547  | 44  | 145.64 | 9.99  | 0.09 |
| chr4 | 98589207  | 98590847  | 1641 | 976  | 70  | 170.11 | 6.25  | 0.06 |
| chr4 | 100937249 | 100938264 | 1016 | 566  | 53  | 183.01 | 10.65 | 0    |
| chr4 | 100964332 | 100966127 | 1796 | 527  | 93  | 260.68 | 8.09  | 0    |
| chr4 | 101027632 | 101028286 | 655  | 199  | 24  | 73.96  | 8.39  | 0.13 |
| chr4 | 101028342 | 101029752 | 1411 | 316  | 70  | 257.15 | 9.26  | 0    |
| chr4 | 101319514 | 101320850 | 1337 | 864  | 73  | 129.3  | 5.15  | 0.08 |
| chr4 | 102786363 | 102787563 | 1201 | 505  | 53  | 113.91 | 6.07  | 0.06 |
| chr4 | 102791841 | 102792563 | 723  | 213  | 28  | 87.52  | 6.78  | 0.07 |
| chr4 | 102887420 | 102888371 | 952  | 530  | 37  | 134.99 | 11.65 | 0.08 |
| chr4 | 102986094 | 102987032 | 939  | 660  | 37  | 97.53  | 5.54  | 0.08 |
| chr4 | 105988305 | 105989216 | 912  | 380  | 39  | 144.01 | 11.87 | 0.09 |
| chr4 | 106511892 | 106513063 | 1172 | 737  | 45  | 91.76  | 6.62  | 0.07 |
| chr4 | 106537706 | 106538728 | 1023 | 696  | 42  | 121.81 | 7.19  | 0.07 |
| chr4 | 106850560 | 106851911 | 1352 | 459  | 64  | 118.96 | 6.36  | 0.07 |
| chr4 | 107040003 | 107041054 | 1052 | 502  | 48  | 172.57 | 10.05 | 0.07 |
| chr4 | 107973106 | 107974345 | 1240 | 529  | 56  | 165.06 | 6.81  | 0.06 |
| chr4 | 108132332 | 108133548 | 1217 | 256  | 45  | 90.65  | 4.54  | 0.07 |
| chr4 | 108251440 | 108252226 | 787  | 463  | 35  | 95.37  | 6.55  | 0.07 |
| chr4 | 108292152 | 108293182 | 1031 | 285  | 50  | 152.35 | 7.28  | 0.1  |
| chr4 | 108952439 | 108953399 | 961  | 405  | 35  | 103.68 | 10.11 | 0.06 |
| chr4 | 109338810 | 109340051 | 1242 | 644  | 61  | 219    | 9.04  | 0    |
| chr4 | 109348665 | 109349854 | 1190 | 478  | 59  | 70.17  | 4.47  | 0.16 |
| chr4 | 111392060 | 111393104 | 1045 | 505  | 42  | 126.82 | 9.52  | 0.07 |
| chr4 | 114659226 | 114660161 | 936  | 353  | 41  | 120.71 | 7.24  | 0.07 |
| chr4 | 114672041 | 114673043 | 1003 | 492  | 42  | 76.73  | 4.98  | 0.12 |
| chr4 | 114725022 | 114725911 | 890  | 509  | 35  | 106.95 | 8.67  | 0.06 |
| chr4 | 114728842 | 114730188 | 1347 | 786  | 75  | 269.13 | 9.79  | 0    |
| chr4 | 115409689 | 115410750 | 1062 | 766  | 41  | 126.9  | 7.58  | 0.07 |
| chr4 | 115500235 | 115501262 | 1028 | 472  | 47  | 81.55  | 6.97  | 0.1  |
| chr4 | 115725943 | 115726906 | 964  | 391  | 33  | 98.85  | 7.55  | 0.08 |
| chr4 | 115747190 | 115748670 | 1481 | 488  | 71  | 133.04 | 6.93  | 0.08 |
| chr4 | 115822436 | 115823381 | 946  | 504  | 33  | 103.95 | 10.53 | 0.06 |
| chr4 | 115893489 | 115894479 | 991  | 781  | 36  | 92.13  | 4.94  | 0.07 |
| chr4 | 116228223 | 116230870 | 2648 | 1397 | 158 | 263.94 | 6.29  | 0    |
| chr4 | 116269680 | 116270716 | 1037 | 519  | 48  | 165.86 | 9.52  | 0.06 |

|      |           |           |      |      |     |        |       |      |
|------|-----------|-----------|------|------|-----|--------|-------|------|
| chr4 | 116322920 | 116324609 | 1690 | 1324 | 89  | 207.66 | 7.78  | 0    |
| chr4 | 116357144 | 116359141 | 1998 | 1130 | 103 | 160.48 | 6.62  | 0.11 |
| chr4 | 116828109 | 116829176 | 1068 | 546  | 50  | 155.04 | 9.37  | 0.1  |
| chr4 | 116854840 | 116855759 | 920  | 390  | 37  | 82.92  | 7.72  | 0.11 |
| chr4 | 116861916 | 116863466 | 1551 | 754  | 81  | 231.39 | 8.46  | 0    |
| chr4 | 116961599 | 116962856 | 1258 | 573  | 52  | 152.25 | 7.61  | 0.1  |
| chr4 | 117354259 | 117355127 | 869  | 531  | 35  | 84.33  | 5.01  | 0.06 |
| chr4 | 117558448 | 117560364 | 1917 | 1350 | 86  | 116.19 | 5.15  | 0.07 |
| chr4 | 117587034 | 117588306 | 1273 | 810  | 65  | 165.75 | 8.76  | 0.06 |
| chr4 | 117806870 | 117808190 | 1321 | 879  | 60  | 140.14 | 7.04  | 0.09 |
| chr4 | 118100062 | 118101787 | 1726 | 598  | 78  | 197.84 | 7.72  | 0    |
| chr4 | 118780956 | 118782364 | 1409 | 439  | 62  | 86.17  | 5.48  | 0.07 |
| chr4 | 119211574 | 119212571 | 998  | 481  | 53  | 144.59 | 7.75  | 0.09 |
| chr4 | 119405875 | 119406813 | 939  | 489  | 45  | 72.26  | 6.32  | 0.15 |
| chr4 | 120077918 | 120078694 | 777  | 399  | 28  | 90.89  | 7.55  | 0.07 |
| chr4 | 120497603 | 120498556 | 954  | 361  | 44  | 108.65 | 7.39  | 0.06 |
| chr4 | 120596985 | 120598307 | 1323 | 801  | 56  | 135.32 | 6.93  | 0.08 |
| chr4 | 120623867 | 120625048 | 1182 | 562  | 61  | 229.65 | 10.95 | 0    |
| chr4 | 120681531 | 120682218 | 688  | 429  | 30  | 100.47 | 10.21 | 0.08 |
| chr4 | 120689023 | 120690209 | 1187 | 739  | 47  | 100.16 | 6.65  | 0.08 |
| chr4 | 120886572 | 120888292 | 1721 | 1176 | 87  | 208.15 | 10.03 | 0    |
| chr4 | 122562411 | 122564228 | 1818 | 554  | 109 | 246.36 | 7.55  | 0    |
| chr4 | 122693710 | 122694365 | 656  | 260  | 27  | 78.71  | 6.81  | 0.12 |
| chr4 | 123249595 | 123250579 | 985  | 463  | 44  | 123.88 | 6.88  | 0.07 |
| chr4 | 123394998 | 123396109 | 1112 | 614  | 47  | 148.08 | 9.52  | 0.1  |
| chr4 | 123427183 | 123428112 | 930  | 413  | 35  | 92.67  | 5.78  | 0.07 |
| chr4 | 123581603 | 123583104 | 1502 | 998  | 65  | 132.78 | 5.06  | 0.08 |
| chr4 | 124373011 | 124374008 | 998  | 563  | 38  | 82.77  | 4.96  | 0.11 |
| chr4 | 124377390 | 124379197 | 1808 | 667  | 72  | 172.32 | 7.91  | 0.07 |
| chr4 | 124385772 | 124388081 | 2310 | 1336 | 113 | 261.64 | 5.73  | 0    |
| chr4 | 124428375 | 124429325 | 951  | 469  | 41  | 88.29  | 7.42  | 0.07 |
| chr4 | 124479168 | 124480229 | 1062 | 516  | 48  | 91.17  | 6.59  | 0.07 |
| chr4 | 124527367 | 124528565 | 1199 | 625  | 64  | 200.77 | 8.48  | 0    |
| chr4 | 124613686 | 124614755 | 1070 | 557  | 46  | 72.33  | 5.3   | 0.15 |
| chr4 | 124743265 | 124744489 | 1225 | 608  | 65  | 182.72 | 9.5   | 0    |
| chr4 | 124761871 | 124762859 | 989  | 308  | 39  | 89.89  | 6.16  | 0.07 |
| chr4 | 124794801 | 124795993 | 1193 | 676  | 55  | 75.57  | 4.66  | 0.13 |
| chr4 | 124804153 | 124805551 | 1399 | 912  | 72  | 128.41 | 5.48  | 0.08 |
| chr4 | 125701324 | 125702609 | 1286 | 458  | 55  | 101.45 | 4.21  | 0.08 |
| chr4 | 125773604 | 125774288 | 685  | 232  | 29  | 81.33  | 6.07  | 0.1  |
| chr4 | 125779958 | 125781853 | 1896 | 1231 | 73  | 97.7   | 3.91  | 0.08 |
| chr4 | 125878627 | 125880747 | 2121 | 1467 | 120 | 169.4  | 6.17  | 0.06 |
| chr4 | 125932555 | 125934376 | 1822 | 967  | 106 | 290.9  | 9.71  | 0    |
| chr4 | 125939010 | 125940058 | 1049 | 677  | 50  | 74.11  | 5.64  | 0.13 |

|      |           |           |      |      |     |        |       |      |
|------|-----------|-----------|------|------|-----|--------|-------|------|
| chr4 | 125998346 | 125999480 | 1135 | 616  | 59  | 77.05  | 6.39  | 0.12 |
| chr4 | 126105592 | 126107893 | 2302 | 1052 | 97  | 117.18 | 5.74  | 0.07 |
| chr4 | 126230206 | 126230993 | 788  | 408  | 25  | 73.01  | 8.2   | 0.13 |
| chr4 | 126286711 | 126287510 | 800  | 431  | 39  | 129.66 | 8.94  | 0.08 |
| chr4 | 126354366 | 126355318 | 953  | 499  | 77  | 206.69 | 12.36 | 0    |
| chr4 | 126430275 | 126431588 | 1314 | 289  | 73  | 185.29 | 7.47  | 0    |
| chr4 | 126697988 | 126700037 | 2050 | 1639 | 82  | 132.54 | 5.32  | 0.08 |
| chr4 | 128404231 | 128405749 | 1519 | 570  | 62  | 157.01 | 9.76  | 0.11 |
| chr4 | 128482470 | 128483192 | 723  | 466  | 23  | 73.39  | 6.99  | 0.13 |
| chr4 | 128483731 | 128484392 | 662  | 327  | 24  | 80.42  | 7.01  | 0.1  |
| chr4 | 128639202 | 128640202 | 1001 | 703  | 48  | 137.28 | 7.71  | 0.08 |
| chr4 | 128726091 | 128726827 | 737  | 407  | 26  | 72.61  | 6.19  | 0.15 |
| chr4 | 128734977 | 128735955 | 979  | 434  | 36  | 87.37  | 7.24  | 0.07 |
| chr4 | 128865821 | 128867599 | 1779 | 386  | 90  | 194.41 | 6.74  | 0    |
| chr4 | 129012081 | 129013179 | 1099 | 512  | 52  | 88.94  | 4.85  | 0.07 |
| chr4 | 129138461 | 129139496 | 1036 | 479  | 43  | 92.55  | 6.68  | 0.07 |
| chr4 | 129219329 | 129220582 | 1254 | 692  | 57  | 141.9  | 6.99  | 0.09 |
| chr4 | 129295663 | 129296929 | 1267 | 670  | 67  | 93.3   | 5.9   | 0.07 |
| chr4 | 129301136 | 129302897 | 1762 | 1266 | 72  | 74.62  | 4.18  | 0.13 |
| chr4 | 129317316 | 129318857 | 1542 | 556  | 70  | 120.57 | 4.91  | 0.07 |
| chr4 | 129349394 | 129350751 | 1358 | 593  | 60  | 143.27 | 5.88  | 0.09 |
| chr4 | 129418967 | 129420421 | 1455 | 581  | 72  | 141.32 | 6.65  | 0.09 |
| chr4 | 129496757 | 129499258 | 2502 | 1223 | 134 | 352.82 | 9.61  | 0    |
| chr4 | 129784523 | 129785419 | 897  | 307  | 40  | 80.95  | 5.29  | 0.1  |
| chr4 | 130036914 | 130037926 | 1013 | 529  | 48  | 97.78  | 7.19  | 0.08 |
| chr4 | 130218876 | 130219876 | 1001 | 490  | 37  | 90.03  | 7.66  | 0.07 |
| chr4 | 130468733 | 130470255 | 1523 | 515  | 76  | 252.1  | 12.31 | 0    |
| chr4 | 131398860 | 131399899 | 1040 | 558  | 47  | 125.66 | 9.25  | 0.07 |
| chr4 | 131428827 | 131430377 | 1551 | 766  | 80  | 279.68 | 8.99  | 0    |
| chr4 | 131466167 | 131467133 | 967  | 477  | 35  | 78.06  | 6.47  | 0.12 |
| chr4 | 131630642 | 131631588 | 947  | 502  | 46  | 114.29 | 7.42  | 0.06 |
| chr4 | 131767463 | 131768544 | 1082 | 468  | 44  | 103.85 | 5.78  | 0.06 |
| chr4 | 131815983 | 131817064 | 1082 | 396  | 41  | 101.48 | 5.54  | 0.08 |
| chr4 | 131825419 | 131826646 | 1228 | 700  | 97  | 290.42 | 12.79 | 0    |
| chr4 | 131829857 | 131830778 | 922  | 342  | 42  | 133.05 | 8.78  | 0.08 |
| chr4 | 131908992 | 131909998 | 1007 | 535  | 38  | 133.22 | 12.71 | 0.08 |
| chr4 | 131977887 | 131978823 | 937  | 406  | 42  | 80.38  | 5.99  | 0.1  |
| chr4 | 132019213 | 132020299 | 1087 | 486  | 47  | 142.64 | 7.64  | 0.09 |
| chr4 | 132065738 | 132066570 | 833  | 566  | 44  | 121.76 | 8.76  | 0.07 |
| chr4 | 132071053 | 132072083 | 1031 | 407  | 38  | 91.76  | 7.24  | 0.07 |
| chr4 | 132091055 | 132092028 | 974  | 375  | 38  | 105.91 | 7.68  | 0.06 |
| chr4 | 132398497 | 132399659 | 1163 | 533  | 54  | 84.27  | 5.22  | 0.06 |
| chr4 | 132439290 | 132440772 | 1483 | 873  | 68  | 121.84 | 4.98  | 0.07 |
| chr4 | 132478213 | 132479283 | 1071 | 483  | 53  | 102.24 | 6.42  | 0.05 |

|      |           |           |      |      |     |        |       |      |
|------|-----------|-----------|------|------|-----|--------|-------|------|
| chr4 | 132673520 | 132674417 | 898  | 527  | 41  | 154.4  | 9.34  | 0.1  |
| chr4 | 132685452 | 132687013 | 1562 | 1063 | 65  | 162.21 | 6.91  | 0.11 |
| chr4 | 132832965 | 132834388 | 1424 | 566  | 75  | 124.95 | 4.9   | 0.07 |
| chr4 | 132925203 | 132926172 | 970  | 505  | 44  | 95.11  | 8.09  | 0.07 |
| chr4 | 133101343 | 133102333 | 991  | 482  | 36  | 110.53 | 9.98  | 0.06 |
| chr4 | 133139686 | 133140931 | 1246 | 754  | 52  | 125.16 | 5.81  | 0.07 |
| chr4 | 133215263 | 133216510 | 1248 | 751  | 53  | 121.74 | 6.25  | 0.07 |
| chr4 | 133227762 | 133229625 | 1864 | 600  | 113 | 247.35 | 6.52  | 0    |
| chr4 | 133308201 | 133310890 | 2690 | 1613 | 135 | 476.53 | 11.49 | 0    |
| chr4 | 133312194 | 133313778 | 1585 | 1117 | 65  | 83.54  | 4.32  | 0.06 |
| chr4 | 133368765 | 133370992 | 2228 | 1181 | 146 | 648.59 | 11.86 | 0    |
| chr4 | 133443353 | 133444553 | 1201 | 709  | 51  | 110.76 | 5.98  | 0.06 |
| chr4 | 133522690 | 133523627 | 938  | 511  | 35  | 92.95  | 7.19  | 0.07 |
| chr4 | 133523873 | 133524804 | 932  | 609  | 41  | 136.73 | 6.66  | 0.08 |
| chr4 | 133556374 | 133557179 | 806  | 406  | 35  | 73.74  | 7.77  | 0.13 |
| chr4 | 133684437 | 133685839 | 1403 | 967  | 67  | 168.94 | 6.09  | 0.06 |
| chr4 | 133842689 | 133844154 | 1466 | 687  | 74  | 240.69 | 8.94  | 0    |
| chr4 | 134023888 | 134025289 | 1402 | 403  | 61  | 114.41 | 5.36  | 0.06 |
| chr4 | 134052247 | 134053370 | 1124 | 621  | 55  | 75.67  | 4.16  | 0.13 |
| chr4 | 134258836 | 134259782 | 947  | 549  | 37  | 90.51  | 6.88  | 0.07 |
| chr4 | 134259794 | 134260893 | 1100 | 433  | 52  | 79.69  | 4.55  | 0.1  |
| chr4 | 134322936 | 134324222 | 1287 | 888  | 49  | 127.67 | 8.54  | 0.07 |
| chr4 | 134478719 | 134481091 | 2373 | 841  | 192 | 459.01 | 13.84 | 0    |
| chr4 | 134484688 | 134485693 | 1006 | 485  | 37  | 70.18  | 6.8   | 0.16 |
| chr4 | 134486174 | 134487492 | 1319 | 896  | 73  | 232.99 | 8.38  | 0    |
| chr4 | 134828154 | 134829574 | 1421 | 610  | 87  | 245.04 | 9.02  | 0    |
| chr4 | 134908472 | 134910217 | 1746 | 1270 | 86  | 228.33 | 7.36  | 0    |
| chr4 | 134989164 | 134990357 | 1194 | 475  | 56  | 196.27 | 10.63 | 0    |
| chr4 | 134995104 | 134995870 | 767  | 326  | 28  | 74.18  | 7.1   | 0.13 |
| chr4 | 135411176 | 135412603 | 1428 | 792  | 76  | 247.17 | 10.52 | 0    |
| chr4 | 135428990 | 135430853 | 1864 | 618  | 112 | 307.4  | 11.94 | 0    |
| chr4 | 135476186 | 135477165 | 980  | 500  | 37  | 84.87  | 6.78  | 0.06 |
| chr4 | 135501325 | 135502980 | 1656 | 1033 | 93  | 120.35 | 6.88  | 0.07 |
| chr4 | 135518651 | 135519993 | 1343 | 853  | 68  | 200.31 | 8.86  | 0    |
| chr4 | 135527950 | 135529004 | 1055 | 596  | 53  | 142.37 | 7.04  | 0.09 |
| chr4 | 135542570 | 135543764 | 1195 | 577  | 59  | 180.52 | 10.11 | 0    |
| chr4 | 135576261 | 135578103 | 1843 | 1314 | 79  | 142.31 | 6.66  | 0.09 |
| chr4 | 135696192 | 135697216 | 1025 | 542  | 40  | 91.74  | 5.83  | 0.07 |
| chr4 | 135699226 | 135703116 | 3891 | 598  | 241 | 501.69 | 9.1   | 0    |
| chr4 | 135703262 | 135703987 | 726  | 195  | 29  | 80.68  | 5.96  | 0.1  |
| chr4 | 135840983 | 135842460 | 1478 | 489  | 65  | 95.17  | 4.58  | 0.07 |
| chr4 | 135866307 | 135867190 | 884  | 432  | 43  | 133.57 | 9.3   | 0.08 |
| chr4 | 136433679 | 136435360 | 1682 | 670  | 82  | 233.22 | 7.46  | 0    |
| chr4 | 136440324 | 136442857 | 2534 | 1742 | 175 | 350.02 | 7     | 0    |

|      |           |           |      |      |     |        |      |      |
|------|-----------|-----------|------|------|-----|--------|------|------|
| chr4 | 136443107 | 136444421 | 1315 | 800  | 53  | 87.33  | 6.2  | 0.07 |
| chr4 | 136445531 | 136449535 | 4005 | 3253 | 268 | 407.99 | 5.97 | 0    |
| chr4 | 136452047 | 136453065 | 1019 | 608  | 43  | 78.73  | 4.65 | 0.12 |
| chr4 | 136453299 | 136455167 | 1869 | 1364 | 88  | 208.39 | 6.68 | 0    |
| chr4 | 136912302 | 136914099 | 1798 | 1296 | 91  | 223.4  | 9.78 | 0    |
| chr4 | 137548602 | 137550660 | 2059 | 710  | 101 | 205.35 | 7.79 | 0    |
| chr4 | 137860105 | 137861235 | 1131 | 580  | 51  | 72.07  | 5.56 | 0.15 |
| chr4 | 138528282 | 138529842 | 1561 | 415  | 65  | 91.66  | 4.18 | 0.07 |
| chr4 | 138748056 | 138750277 | 2222 | 548  | 108 | 260.95 | 9.39 | 0    |
| chr4 | 138866065 | 138867361 | 1297 | 614  | 69  | 184.07 | 8.76 | 0    |
| chr4 | 138907817 | 138908759 | 943  | 585  | 53  | 116.9  | 7.01 | 0.07 |
| chr4 | 138935883 | 138936967 | 1085 | 576  | 50  | 92     | 7.8  | 0.07 |
| chr4 | 139129708 | 139131149 | 1442 | 935  | 62  | 99.04  | 5.78 | 0.08 |
| chr4 | 139178235 | 139179444 | 1210 | 686  | 55  | 82.49  | 4.7  | 0.11 |
| chr4 | 140137048 | 140138162 | 1115 | 554  | 51  | 109.37 | 7.12 | 0.06 |
| chr4 | 140516741 | 140518098 | 1358 | 645  | 71  | 106.3  | 5.55 | 0.06 |
| chr4 | 140519868 | 140521199 | 1332 | 756  | 57  | 119.09 | 5.49 | 0.07 |
| chr4 | 140538797 | 140539824 | 1028 | 746  | 44  | 93.38  | 5.42 | 0.07 |
| chr4 | 140542379 | 140545057 | 2679 | 473  | 132 | 277.58 | 6.91 | 0    |
| chr4 | 140633484 | 140634666 | 1183 | 794  | 53  | 109.84 | 6.47 | 0.06 |
| chr4 | 140694426 | 140696212 | 1787 | 1228 | 98  | 277.96 | 9.5  | 0    |
| chr4 | 140703237 | 140704226 | 990  | 484  | 36  | 98.87  | 9.52 | 0.08 |
| chr4 | 141000060 | 141000685 | 626  | 431  | 22  | 70.02  | 6.26 | 0.16 |
| chr4 | 141093333 | 141094095 | 763  | 264  | 28  | 70.7   | 4.68 | 0.16 |
| chr4 | 141094510 | 141095459 | 950  | 491  | 37  | 79.33  | 5.52 | 0.1  |
| chr4 | 141100865 | 141103440 | 2576 | 1280 | 161 | 492.6  | 8.76 | 0    |
| chr4 | 141161246 | 141162362 | 1117 | 560  | 58  | 92.62  | 6.66 | 0.07 |
| chr4 | 141219703 | 141220524 | 822  | 438  | 32  | 90.58  | 9.44 | 0.07 |
| chr4 | 141277674 | 141279861 | 2188 | 1550 | 101 | 230.73 | 6.68 | 0    |
| chr4 | 141346027 | 141347159 | 1133 | 860  | 56  | 146.66 | 5.98 | 0.09 |
| chr4 | 141349057 | 141350220 | 1164 | 402  | 65  | 75.38  | 4.14 | 0.13 |
| chr4 | 141412899 | 141414236 | 1338 | 693  | 67  | 166.27 | 6.41 | 0.06 |
| chr4 | 141425072 | 141426099 | 1028 | 734  | 41  | 95.24  | 6.55 | 0.07 |
| chr4 | 141426523 | 141428415 | 1893 | 972  | 113 | 242.09 | 6    | 0    |
| chr4 | 141428701 | 141431380 | 2680 | 2109 | 154 | 353.95 | 8.96 | 0    |
| chr4 | 142751320 | 142752526 | 1207 | 638  | 76  | 128.86 | 7.47 | 0.08 |
| chr4 | 142802172 | 142803389 | 1218 | 448  | 58  | 182.75 | 7.75 | 0    |
| chr4 | 143001947 | 143003438 | 1492 | 952  | 71  | 155.21 | 6.8  | 0.1  |
| chr4 | 144480230 | 144485736 | 5507 | 2047 | 300 | 483.64 | 5.15 | 0    |
| chr4 | 144835473 | 144837208 | 1736 | 1288 | 92  | 263.67 | 8.05 | 0    |
| chr4 | 147278227 | 147279463 | 1237 | 708  | 69  | 225.5  | 9.25 | 0    |
| chr4 | 147412201 | 147413673 | 1473 | 612  | 81  | 92.57  | 4.82 | 0.07 |
| chr4 | 147461545 | 147462610 | 1066 | 524  | 44  | 105.89 | 6.93 | 0.06 |
| chr4 | 147525476 | 147526497 | 1022 | 455  | 55  | 89.5   | 6.24 | 0.07 |

|      |           |           |      |      |     |        |       |      |
|------|-----------|-----------|------|------|-----|--------|-------|------|
| chr4 | 147818312 | 147819317 | 1006 | 543  | 39  | 87.85  | 6.93  | 0.07 |
| chr4 | 147822115 | 147823109 | 995  | 510  | 39  | 73.69  | 5.06  | 0.13 |
| chr4 | 147932106 | 147933332 | 1227 | 496  | 58  | 103.05 | 5.02  | 0.06 |
| chr4 | 148000303 | 148001663 | 1361 | 438  | 68  | 116.39 | 4.96  | 0.07 |
| chr4 | 148314315 | 148315923 | 1609 | 1253 | 87  | 158.95 | 5.62  | 0.11 |
| chr4 | 148540144 | 148541607 | 1464 | 651  | 78  | 177.6  | 6.29  | 0.07 |
| chr4 | 148681239 | 148682317 | 1079 | 544  | 48  | 88.99  | 5.09  | 0.07 |
| chr4 | 148858838 | 148859848 | 1011 | 569  | 52  | 159.58 | 12.33 | 0.11 |
| chr4 | 148891799 | 148892620 | 822  | 466  | 33  | 79.93  | 8.09  | 0.1  |
| chr4 | 149076174 | 149077425 | 1252 | 758  | 49  | 122.73 | 7.2   | 0.07 |
| chr4 | 149111847 | 149112723 | 877  | 441  | 29  | 73.62  | 9.1   | 0.13 |
| chr4 | 149147775 | 149148737 | 963  | 486  | 45  | 101.01 | 6.8   | 0.08 |
| chr4 | 149422129 | 149423040 | 912  | 451  | 37  | 78.93  | 5.28  | 0.1  |
| chr4 | 149434489 | 149435395 | 907  | 484  | 32  | 75.01  | 5.54  | 0.13 |
| chr4 | 149461069 | 149462336 | 1268 | 838  | 48  | 94.48  | 6.96  | 0.07 |
| chr4 | 149610408 | 149611723 | 1316 | 634  | 68  | 129.17 | 7.01  | 0.08 |
| chr4 | 149655003 | 149656263 | 1261 | 762  | 52  | 130.39 | 7.69  | 0.08 |
| chr4 | 149939906 | 149940855 | 950  | 566  | 42  | 70.29  | 6.7   | 0.16 |
| chr4 | 149942900 | 149945002 | 2103 | 509  | 100 | 251.69 | 6.99  | 0    |
| chr4 | 150287556 | 150289233 | 1678 | 1232 | 74  | 112.39 | 5.54  | 0.06 |
| chr4 | 150418294 | 150419271 | 978  | 478  | 36  | 81.77  | 5.26  | 0.1  |
| chr4 | 150431328 | 150432723 | 1396 | 839  | 79  | 203.89 | 10.27 | 0    |
| chr4 | 151235570 | 151237167 | 1598 | 1163 | 68  | 116.41 | 4.49  | 0.07 |
| chr4 | 151362234 | 151363491 | 1258 | 845  | 51  | 110.47 | 6.62  | 0.06 |
| chr4 | 151369702 | 151371307 | 1606 | 968  | 95  | 243.98 | 6.29  | 0    |
| chr4 | 151382326 | 151383629 | 1304 | 625  | 63  | 121.01 | 6.07  | 0.07 |
| chr4 | 151670795 | 151671960 | 1166 | 388  | 61  | 138.67 | 6.29  | 0.09 |
| chr4 | 153330439 | 153331798 | 1360 | 840  | 71  | 123.33 | 5.56  | 0.07 |
| chr4 | 153385582 | 153386230 | 649  | 373  | 23  | 76.37  | 6.52  | 0.12 |
| chr4 | 154337825 | 154338970 | 1146 | 407  | 53  | 161.24 | 8.94  | 0.11 |
| chr4 | 154440520 | 154441504 | 985  | 467  | 52  | 95.52  | 5.82  | 0.08 |
| chr4 | 154596919 | 154598177 | 1259 | 550  | 115 | 572.42 | 24.51 | 0    |
| chr4 | 154608702 | 154609726 | 1025 | 433  | 43  | 99.76  | 7.36  | 0.08 |
| chr4 | 154623605 | 154624737 | 1133 | 522  | 67  | 193.36 | 9.06  | 0    |
| chr4 | 154864782 | 154866361 | 1580 | 437  | 65  | 84.05  | 4.05  | 0.06 |
| chr4 | 154936190 | 154938594 | 2405 | 446  | 129 | 172.2  | 5.03  | 0.07 |
| chr4 | 154974920 | 154976264 | 1345 | 879  | 61  | 169    | 7.69  | 0.06 |
| chr4 | 154998126 | 154999532 | 1407 | 819  | 121 | 250.43 | 9.17  | 0    |
| chr4 | 155042839 | 155043845 | 1007 | 505  | 41  | 81.34  | 6.74  | 0.1  |
| chr4 | 155078348 | 155079872 | 1525 | 910  | 105 | 191.55 | 7.69  | 0    |
| chr4 | 155107998 | 155109423 | 1426 | 815  | 72  | 145.57 | 6.93  | 0.09 |
| chr4 | 155177256 | 155178205 | 950  | 503  | 41  | 74.32  | 6.59  | 0.13 |
| chr4 | 155185882 | 155187213 | 1332 | 515  | 89  | 199.41 | 7.61  | 0    |
| chr4 | 155205215 | 155206323 | 1109 | 539  | 65  | 177.83 | 9.02  | 0.07 |

|      |           |           |      |      |     |        |       |      |
|------|-----------|-----------|------|------|-----|--------|-------|------|
| chr4 | 155243178 | 155244220 | 1043 | 580  | 42  | 104.88 | 8.09  | 0.06 |
| chr4 | 155265409 | 155266724 | 1316 | 524  | 60  | 75.17  | 5.24  | 0.13 |
| chr4 | 155317135 | 155318396 | 1262 | 594  | 61  | 154.1  | 7.74  | 0.1  |
| chr4 | 155365776 | 155367901 | 2126 | 1352 | 106 | 228.33 | 8.44  | 0    |
| chr4 | 155609416 | 155610850 | 1435 | 1238 | 90  | 192.38 | 5.64  | 0    |
| chr5 | 3647427   | 3648186   | 760  | 444  | 26  | 87.66  | 7.57  | 0.07 |
| chr5 | 4104203   | 4105065   | 863  | 316  | 38  | 120.52 | 6.74  | 0.07 |
| chr5 | 5559002   | 5559845   | 844  | 552  | 43  | 114.29 | 8.43  | 0.06 |
| chr5 | 8055954   | 8057595   | 1642 | 636  | 85  | 227.3  | 7.39  | 0    |
| chr5 | 8422262   | 8423246   | 985  | 364  | 41  | 100.69 | 6.93  | 0.08 |
| chr5 | 8996715   | 8997685   | 971  | 455  | 44  | 133.44 | 8.94  | 0.08 |
| chr5 | 9160911   | 9162445   | 1535 | 1043 | 77  | 179.47 | 6.8   | 0    |
| chr5 | 20207321  | 20208331  | 1011 | 443  | 45  | 118.72 | 8.09  | 0.07 |
| chr5 | 20457283  | 20458259  | 977  | 543  | 40  | 75.58  | 6.47  | 0.13 |
| chr5 | 20560137  | 20562491  | 2355 | 1840 | 103 | 385.88 | 8.66  | 0    |
| chr5 | 21206938  | 21207964  | 1027 | 516  | 43  | 73.7   | 4.79  | 0.13 |
| chr5 | 21290491  | 21291574  | 1084 | 547  | 51  | 178.12 | 11.42 | 0    |
| chr5 | 22055593  | 22056620  | 1028 | 658  | 38  | 73.39  | 5.42  | 0.13 |
| chr5 | 22923821  | 22924944  | 1124 | 464  | 56  | 205.22 | 11.9  | 0    |
| chr5 | 22938147  | 22941848  | 3702 | 1886 | 262 | 809.34 | 10.57 | 0    |
| chr5 | 23535968  | 23536911  | 944  | 523  | 41  | 79.5   | 5.91  | 0.1  |
| chr5 | 23928926  | 23930092  | 1167 | 579  | 57  | 82.53  | 4.66  | 0.11 |
| chr5 | 23930483  | 23931621  | 1139 | 638  | 43  | 78.99  | 5.21  | 0.1  |
| chr5 | 23950398  | 23951640  | 1243 | 741  | 71  | 262.06 | 11.5  | 0    |
| chr5 | 23957168  | 23958166  | 999  | 292  | 43  | 119.02 | 8.67  | 0.07 |
| chr5 | 24082819  | 24084111  | 1293 | 517  | 76  | 150.12 | 7.36  | 0.1  |
| chr5 | 24190192  | 24192076  | 1885 | 1206 | 86  | 195.65 | 7.39  | 0    |
| chr5 | 24256319  | 24257300  | 982  | 456  | 35  | 100.45 | 9.05  | 0.08 |
| chr5 | 24347611  | 24349230  | 1620 | 826  | 90  | 160.57 | 5.15  | 0.11 |
| chr5 | 24605400  | 24607497  | 2098 | 1263 | 99  | 252.44 | 7.36  | 0    |
| chr5 | 24728264  | 24729325  | 1062 | 431  | 55  | 187.93 | 10.65 | 0    |
| chr5 | 25004841  | 25006063  | 1223 | 784  | 53  | 117.82 | 5.98  | 0.07 |
| chr5 | 25034999  | 25036289  | 1291 | 769  | 55  | 92.78  | 6.27  | 0.07 |
| chr5 | 28117496  | 28118766  | 1271 | 864  | 68  | 150.04 | 6.93  | 0.1  |
| chr5 | 28397157  | 28399084  | 1928 | 762  | 104 | 177.61 | 5.69  | 0.07 |
| chr5 | 28642922  | 28644537  | 1616 | 725  | 94  | 299.68 | 9.19  | 0    |
| chr5 | 29704476  | 29705370  | 895  | 510  | 43  | 86.11  | 7.22  | 0.07 |
| chr5 | 30062011  | 30062814  | 804  | 455  | 52  | 127.12 | 7.08  | 0.07 |
| chr5 | 30481007  | 30482196  | 1190 | 625  | 63  | 160.19 | 10.03 | 0.11 |
| chr5 | 30949795  | 30951016  | 1222 | 544  | 61  | 130.01 | 6.29  | 0.08 |
| chr5 | 30952654  | 30954433  | 1780 | 515  | 87  | 132.43 | 5.56  | 0.08 |
| chr5 | 30968397  | 30969534  | 1138 | 180  | 42  | 81.82  | 4.05  | 0.1  |
| chr5 | 31189972  | 31192035  | 2064 | 994  | 123 | 273.7  | 9.98  | 0    |
| chr5 | 31209631  | 31210529  | 899  | 433  | 40  | 76.3   | 5.99  | 0.12 |

|      |          |          |      |      |     |        |       |      |
|------|----------|----------|------|------|-----|--------|-------|------|
| chr5 | 31217667 | 31219159 | 1493 | 1050 | 62  | 116.85 | 5.64  | 0.07 |
| chr5 | 31251741 | 31252887 | 1147 | 612  | 55  | 95.38  | 5.93  | 0.07 |
| chr5 | 31262066 | 31263119 | 1054 | 535  | 51  | 111.99 | 8.4   | 0.06 |
| chr5 | 31263518 | 31264459 | 942  | 522  | 38  | 80.06  | 5.63  | 0.1  |
| chr5 | 31350055 | 31352126 | 2072 | 517  | 99  | 142.89 | 5.06  | 0.09 |
| chr5 | 31456188 | 31457042 | 855  | 499  | 36  | 86.12  | 7.36  | 0.07 |
| chr5 | 31481757 | 31483369 | 1613 | 678  | 73  | 166.54 | 7.04  | 0.06 |
| chr5 | 31494991 | 31496172 | 1182 | 755  | 59  | 113.77 | 5.02  | 0.06 |
| chr5 | 31503213 | 31505438 | 2226 | 1636 | 154 | 336.32 | 10.63 | 0    |
| chr5 | 31522586 | 31523656 | 1071 | 562  | 47  | 85.58  | 6.89  | 0.07 |
| chr5 | 31542701 | 31544364 | 1664 | 462  | 116 | 547.39 | 18.09 | 0    |
| chr5 | 31592913 | 31594196 | 1284 | 563  | 74  | 113.23 | 5.32  | 0.06 |
| chr5 | 31872956 | 31874030 | 1075 | 669  | 44  | 77.46  | 4.53  | 0.12 |
| chr5 | 31999667 | 32001320 | 1654 | 1160 | 92  | 208.65 | 6.93  | 0    |
| chr5 | 32437141 | 32440198 | 3058 | 1753 | 166 | 448.47 | 7.32  | 0    |
| chr5 | 32760532 | 32762426 | 1895 | 574  | 98  | 112.37 | 4.77  | 0.06 |
| chr5 | 33088602 | 33089690 | 1089 | 496  | 49  | 131.21 | 8.56  | 0.08 |
| chr5 | 33196241 | 33197350 | 1110 | 580  | 56  | 142.72 | 7.75  | 0.09 |
| chr5 | 33340025 | 33340716 | 692  | 497  | 31  | 71.33  | 6.92  | 0.15 |
| chr5 | 33360709 | 33362180 | 1472 | 966  | 85  | 234.43 | 8.41  | 0    |
| chr5 | 33362488 | 33363583 | 1096 | 724  | 39  | 84.09  | 5.69  | 0.06 |
| chr5 | 33677540 | 33678618 | 1079 | 407  | 54  | 95.38  | 6.26  | 0.08 |
| chr5 | 33720550 | 33721877 | 1328 | 707  | 71  | 121.96 | 5.88  | 0.07 |
| chr5 | 33971273 | 33972905 | 1633 | 955  | 92  | 184.1  | 6.26  | 0    |
| chr5 | 33994349 | 33995773 | 1425 | 554  | 71  | 156.65 | 7.78  | 0.11 |
| chr5 | 34000076 | 34001737 | 1662 | 572  | 87  | 127.58 | 5.09  | 0.07 |
| chr5 | 34278273 | 34279713 | 1441 | 864  | 94  | 186.97 | 7.42  | 0    |
| chr5 | 34511776 | 34512705 | 930  | 467  | 36  | 76.87  | 5.52  | 0.12 |
| chr5 | 34513000 | 34514184 | 1185 | 483  | 44  | 116.55 | 6.93  | 0.07 |
| chr5 | 34529644 | 34531268 | 1625 | 694  | 86  | 180.26 | 6.86  | 0    |
| chr5 | 34584928 | 34586267 | 1340 | 660  | 58  | 83.85  | 4.32  | 0.06 |
| chr5 | 34678172 | 34680050 | 1879 | 657  | 103 | 196.13 | 6.79  | 0    |
| chr5 | 34711608 | 34712681 | 1074 | 670  | 48  | 80.01  | 5.02  | 0.1  |
| chr5 | 34855807 | 34857243 | 1437 | 811  | 67  | 91.32  | 4.41  | 0.07 |
| chr5 | 34868113 | 34870004 | 1892 | 377  | 90  | 228.21 | 6.62  | 0    |
| chr5 | 34876357 | 34878841 | 2485 | 1370 | 118 | 175.61 | 5.22  | 0.07 |
| chr5 | 34885534 | 34887303 | 1770 | 566  | 82  | 159.31 | 8.59  | 0.11 |
| chr5 | 34915746 | 34916974 | 1229 | 465  | 58  | 159.73 | 7.32  | 0.11 |
| chr5 | 35002194 | 35003664 | 1471 | 726  | 78  | 101.8  | 5.11  | 0.05 |
| chr5 | 35103851 | 35104708 | 858  | 482  | 43  | 124.18 | 6.99  | 0.07 |
| chr5 | 35924939 | 35926347 | 1409 | 844  | 60  | 119.83 | 5.36  | 0.07 |
| chr5 | 36924344 | 36925314 | 971  | 489  | 50  | 103.03 | 4.74  | 0.06 |
| chr5 | 37051928 | 37052534 | 607  | 319  | 23  | 87.51  | 9.32  | 0.07 |
| chr5 | 37102814 | 37103849 | 1036 | 393  | 36  | 85.18  | 5.26  | 0.07 |

|      |          |          |      |      |     |        |       |      |
|------|----------|----------|------|------|-----|--------|-------|------|
| chr5 | 37139392 | 37140245 | 854  | 516  | 44  | 101.86 | 8.99  | 0.05 |
| chr5 | 37379649 | 37380687 | 1039 | 494  | 43  | 81.64  | 6.47  | 0.1  |
| chr5 | 38430118 | 38431135 | 1018 | 428  | 41  | 85.17  | 4.57  | 0.07 |
| chr5 | 38611108 | 38612053 | 946  | 655  | 47  | 108.07 | 5.91  | 0.06 |
| chr5 | 38651163 | 38652227 | 1065 | 534  | 54  | 139.01 | 9.1   | 0.09 |
| chr5 | 38951972 | 38953447 | 1476 | 809  | 72  | 162.6  | 6.47  | 0.12 |
| chr5 | 42235159 | 42235952 | 794  | 495  | 32  | 122.97 | 11.65 | 0.07 |
| chr5 | 43623421 | 43626030 | 2610 | 1120 | 194 | 670.56 | 16.83 | 0    |
| chr5 | 44172844 | 44174084 | 1241 | 809  | 48  | 145.37 | 8.54  | 0.09 |
| chr5 | 45841045 | 45842101 | 1057 | 574  | 47  | 97.88  | 5.5   | 0.08 |
| chr5 | 45911163 | 45912051 | 889  | 459  | 37  | 77.05  | 8.43  | 0.12 |
| chr5 | 46248317 | 46249352 | 1036 | 512  | 45  | 86.02  | 5.6   | 0.07 |
| chr5 | 48763093 | 48764133 | 1041 | 515  | 42  | 112.01 | 9.37  | 0.06 |
| chr5 | 52581331 | 52582286 | 956  | 619  | 40  | 126.91 | 7.14  | 0.07 |
| chr5 | 53174194 | 53174944 | 751  | 315  | 30  | 112.92 | 11.97 | 0.06 |
| chr5 | 53224707 | 53225881 | 1175 | 718  | 53  | 124.32 | 7.74  | 0.07 |
| chr5 | 53981120 | 53982100 | 981  | 483  | 40  | 90.25  | 6.99  | 0.07 |
| chr5 | 64727878 | 64729577 | 1700 | 360  | 70  | 135.78 | 5.5   | 0.08 |
| chr5 | 64769937 | 64771021 | 1085 | 684  | 42  | 72.09  | 4.21  | 0.15 |
| chr5 | 65193589 | 65195681 | 2093 | 523  | 98  | 266.26 | 10.52 | 0    |
| chr5 | 65275163 | 65276001 | 839  | 547  | 37  | 84.27  | 6.45  | 0.06 |
| chr5 | 65350554 | 65351514 | 961  | 451  | 36  | 83.71  | 6.47  | 0.06 |
| chr5 | 65498340 | 65499625 | 1286 | 524  | 61  | 220.55 | 11.91 | 0    |
| chr5 | 65726371 | 65727378 | 1008 | 485  | 37  | 89.22  | 6.81  | 0.07 |
| chr5 | 65781795 | 65783267 | 1473 | 980  | 118 | 315.62 | 15.03 | 0    |
| chr5 | 65826512 | 65827778 | 1267 | 784  | 57  | 167.01 | 7.66  | 0.06 |
| chr5 | 65883101 | 65884784 | 1684 | 936  | 88  | 193.26 | 6.59  | 0    |
| chr5 | 65927808 | 65929338 | 1531 | 729  | 73  | 266.71 | 10.62 | 0    |
| chr5 | 66088712 | 66090464 | 1753 | 198  | 68  | 188    | 6.19  | 0    |
| chr5 | 66115422 | 66116873 | 1452 | 693  | 63  | 198.75 | 7.61  | 0    |
| chr5 | 66154745 | 66156306 | 1562 | 517  | 57  | 161.26 | 7.9   | 0.11 |
| chr5 | 66540020 | 66541105 | 1086 | 188  | 40  | 83.6   | 4.62  | 0.06 |
| chr5 | 66541233 | 66543673 | 2441 | 1760 | 125 | 260.48 | 8.39  | 0    |
| chr5 | 67697691 | 67698774 | 1084 | 560  | 49  | 74.1   | 5.48  | 0.13 |
| chr5 | 68206403 | 68207208 | 806  | 295  | 30  | 85.94  | 6.99  | 0.07 |
| chr5 | 68238198 | 68239344 | 1147 | 597  | 48  | 76     | 4.62  | 0.14 |
| chr5 | 69947638 | 69948713 | 1076 | 543  | 61  | 204.63 | 11.94 | 0    |
| chr5 | 72558817 | 72559821 | 1005 | 516  | 50  | 181.66 | 13.09 | 0    |
| chr5 | 72594007 | 72595039 | 1033 | 508  | 38  | 112.6  | 9.61  | 0.06 |
| chr5 | 73259258 | 73260119 | 862  | 468  | 39  | 76.59  | 5.09  | 0.12 |
| chr5 | 73304740 | 73306662 | 1923 | 957  | 108 | 298.03 | 9.1   | 0    |
| chr5 | 73647169 | 73647834 | 666  | 316  | 24  | 70.2   | 6.22  | 0.16 |
| chr5 | 73683634 | 73684525 | 892  | 497  | 49  | 116.06 | 6.65  | 0.07 |
| chr5 | 74464141 | 74465075 | 935  | 458  | 36  | 86.78  | 6.07  | 0.07 |

|      |           |           |      |      |     |        |       |      |
|------|-----------|-----------|------|------|-----|--------|-------|------|
| chr5 | 74927336  | 74928217  | 882  | 442  | 45  | 92.83  | 7.25  | 0.07 |
| chr5 | 75439767  | 75441070  | 1304 | 699  | 62  | 207.87 | 8.73  | 0    |
| chr5 | 76569011  | 76570177  | 1167 | 562  | 57  | 166.81 | 8.9   | 0.06 |
| chr5 | 76732684  | 76733421  | 738  | 427  | 24  | 70.99  | 7.5   | 0.16 |
| chr5 | 76733568  | 76734681  | 1114 | 715  | 42  | 110.16 | 5.84  | 0.06 |
| chr5 | 76957981  | 76958949  | 969  | 636  | 36  | 94.07  | 5.81  | 0.07 |
| chr5 | 77334004  | 77335722  | 1719 | 559  | 139 | 399.62 | 17.16 | 0    |
| chr5 | 77379890  | 77381260  | 1371 | 354  | 68  | 121.23 | 4.85  | 0.07 |
| chr5 | 77403544  | 77404548  | 1005 | 478  | 42  | 103.34 | 8.86  | 0.06 |
| chr5 | 77694426  | 77696194  | 1769 | 390  | 64  | 176.73 | 8.35  | 0.07 |
| chr5 | 77738793  | 77739985  | 1193 | 733  | 50  | 78.86  | 4.33  | 0.12 |
| chr5 | 86601192  | 86602429  | 1238 | 515  | 47  | 81.99  | 5.39  | 0.1  |
| chr5 | 87232872  | 87234158  | 1287 | 487  | 60  | 92.89  | 6.26  | 0.07 |
| chr5 | 88982742  | 88983969  | 1228 | 586  | 68  | 244.29 | 10.22 | 0    |
| chr5 | 88993403  | 88994586  | 1184 | 459  | 45  | 141.31 | 7.88  | 0.09 |
| chr5 | 89104752  | 89105732  | 981  | 402  | 45  | 161.68 | 8.93  | 0.11 |
| chr5 | 89149332  | 89151044  | 1713 | 578  | 76  | 110.87 | 5.39  | 0.06 |
| chr5 | 89193388  | 89194772  | 1385 | 897  | 54  | 79.04  | 5.39  | 0.1  |
| chr5 | 90795016  | 90796344  | 1329 | 562  | 89  | 431.35 | 16.18 | 0    |
| chr5 | 91128927  | 91129776  | 850  | 397  | 30  | 77.32  | 5.91  | 0.12 |
| chr5 | 92391054  | 92392646  | 1593 | 504  | 87  | 144.3  | 4.52  | 0.09 |
| chr5 | 92511672  | 92513287  | 1616 | 519  | 75  | 166.72 | 5.73  | 0.06 |
| chr5 | 92566341  | 92567534  | 1194 | 619  | 62  | 132.48 | 7.8   | 0.08 |
| chr5 | 92934208  | 92935359  | 1152 | 454  | 56  | 129.08 | 5.83  | 0.08 |
| chr5 | 93695786  | 93697829  | 2044 | 891  | 106 | 239.37 | 8.4   | 0    |
| chr5 | 96591128  | 96592079  | 952  | 491  | 36  | 84.76  | 6.07  | 0.06 |
| chr5 | 96638512  | 96639724  | 1213 | 545  | 62  | 105.74 | 7.08  | 0.06 |
| chr5 | 98459199  | 98460392  | 1194 | 976  | 42  | 114.01 | 6.66  | 0.06 |
| chr5 | 99679582  | 99680975  | 1394 | 520  | 51  | 75.68  | 4.36  | 0.13 |
| chr5 | 99681099  | 99682553  | 1455 | 989  | 76  | 196.72 | 10.45 | 0    |
| chr5 | 100467032 | 100469665 | 2634 | 918  | 145 | 285.51 | 6.47  | 0    |
| chr5 | 100844728 | 100845731 | 1004 | 488  | 49  | 98.56  | 5.49  | 0.08 |
| chr5 | 100857761 | 100859310 | 1550 | 1021 | 93  | 130.18 | 5.92  | 0.08 |
| chr5 | 100927070 | 100927980 | 911  | 396  | 32  | 96.23  | 7.36  | 0.08 |
| chr5 | 102498435 | 102500195 | 1761 | 494  | 92  | 310.31 | 10.79 | 0    |
| chr5 | 102910492 | 102911549 | 1058 | 858  | 38  | 88.57  | 6.11  | 0.07 |
| chr5 | 104120777 | 104121983 | 1207 | 521  | 57  | 81.41  | 5.64  | 0.1  |
| chr5 | 104182439 | 104183760 | 1322 | 878  | 64  | 218.03 | 7.81  | 0    |
| chr5 | 104450389 | 104451519 | 1131 | 474  | 48  | 133.82 | 7.66  | 0.08 |
| chr5 | 104475305 | 104476376 | 1072 | 583  | 49  | 132.18 | 9.63  | 0.08 |
| chr5 | 105947552 | 105948852 | 1301 | 902  | 51  | 128.26 | 5.54  | 0.08 |
| chr5 | 106128250 | 106129998 | 1749 | 732  | 73  | 215.42 | 8.47  | 0    |
| chr5 | 106304945 | 106306099 | 1155 | 667  | 47  | 133.19 | 8.54  | 0.08 |
| chr5 | 107124600 | 107125976 | 1377 | 399  | 54  | 140.52 | 5.28  | 0.09 |

|      |           |           |      |      |     |        |       |      |
|------|-----------|-----------|------|------|-----|--------|-------|------|
| chr5 | 108026648 | 108027441 | 794  | 367  | 29  | 101.91 | 8.09  | 0.05 |
| chr5 | 108297331 | 108298661 | 1331 | 760  | 58  | 153.93 | 8.09  | 0.1  |
| chr5 | 108494095 | 108495209 | 1115 | 659  | 65  | 134.75 | 7.84  | 0.08 |
| chr5 | 108560916 | 108562164 | 1249 | 690  | 51  | 92.48  | 5.83  | 0.07 |
| chr5 | 108741152 | 108742273 | 1122 | 589  | 88  | 440.07 | 17.08 | 0    |
| chr5 | 108862709 | 108863905 | 1197 | 838  | 50  | 100.08 | 5.39  | 0.08 |
| chr5 | 109058130 | 109059262 | 1133 | 473  | 56  | 112.8  | 5.78  | 0.06 |
| chr5 | 109089223 | 109090064 | 842  | 340  | 31  | 77.16  | 6.29  | 0.12 |
| chr5 | 109097818 | 109098836 | 1019 | 505  | 47  | 78.29  | 5.93  | 0.12 |
| chr5 | 109985030 | 109987257 | 2228 | 1695 | 100 | 72.27  | 3.35  | 0.15 |
| chr5 | 110536281 | 110537999 | 1719 | 519  | 86  | 168.77 | 5.2   | 0.06 |
| chr5 | 110538786 | 110539680 | 895  | 319  | 36  | 92.31  | 5.29  | 0.07 |
| chr5 | 110564109 | 110565423 | 1315 | 794  | 53  | 106.34 | 5.28  | 0.06 |
| chr5 | 110605271 | 110606408 | 1138 | 656  | 47  | 119.45 | 6.47  | 0.07 |
| chr5 | 110659453 | 110660633 | 1181 | 479  | 53  | 78.15  | 4.7   | 0.12 |
| chr5 | 110698531 | 110699267 | 737  | 353  | 28  | 73.8   | 5.96  | 0.13 |
| chr5 | 111081877 | 111082998 | 1122 | 533  | 59  | 111.28 | 7.83  | 0.06 |
| chr5 | 111198823 | 111200396 | 1574 | 788  | 84  | 190.54 | 7.19  | 0    |
| chr5 | 111236884 | 111238001 | 1118 | 541  | 58  | 102.17 | 6.07  | 0.05 |
| chr5 | 111238698 | 111239553 | 856  | 336  | 39  | 107.13 | 9.2   | 0.06 |
| chr5 | 111759337 | 111760439 | 1103 | 444  | 52  | 75.1   | 5.15  | 0.13 |
| chr5 | 112694283 | 112695875 | 1593 | 476  | 60  | 79.21  | 4.62  | 0.1  |
| chr5 | 112705060 | 112706721 | 1662 | 555  | 92  | 81.35  | 4.48  | 0.1  |
| chr5 | 112754787 | 112755986 | 1200 | 622  | 78  | 247.09 | 11.65 | 0    |
| chr5 | 112771546 | 112772632 | 1087 | 545  | 78  | 167.19 | 10.22 | 0.06 |
| chr5 | 114185102 | 114186503 | 1402 | 806  | 83  | 196.7  | 7.81  | 0    |
| chr5 | 114221043 | 114223117 | 2075 | 791  | 122 | 292.46 | 10.69 | 0    |
| chr5 | 114357536 | 114359326 | 1791 | 578  | 87  | 214.68 | 8.09  | 0    |
| chr5 | 114394756 | 114396108 | 1353 | 724  | 71  | 137.43 | 5.39  | 0.08 |
| chr5 | 114829931 | 114831437 | 1507 | 968  | 72  | 231.7  | 8.89  | 0    |
| chr5 | 115117057 | 115118222 | 1166 | 635  | 57  | 96.24  | 6.52  | 0.08 |
| chr5 | 115139843 | 115141438 | 1596 | 1045 | 69  | 148.63 | 7.39  | 0.1  |
| chr5 | 115148912 | 115149665 | 754  | 450  | 34  | 80.12  | 7.08  | 0.1  |
| chr5 | 115224095 | 115225389 | 1295 | 718  | 57  | 114.13 | 5.5   | 0.06 |
| chr5 | 115391880 | 115392766 | 887  | 380  | 33  | 88.11  | 7.19  | 0.07 |
| chr5 | 115460596 | 115461534 | 939  | 408  | 38  | 118.54 | 10.59 | 0.07 |
| chr5 | 115607643 | 115608984 | 1342 | 728  | 67  | 134.22 | 5.49  | 0.08 |
| chr5 | 115722475 | 115723423 | 949  | 397  | 44  | 153.61 | 9.04  | 0.1  |
| chr5 | 115776486 | 115777541 | 1056 | 508  | 55  | 153.62 | 10.55 | 0.1  |
| chr5 | 115790504 | 115791746 | 1243 | 722  | 79  | 197.12 | 10.25 | 0    |
| chr5 | 115939061 | 115940645 | 1585 | 931  | 77  | 124.08 | 6     | 0.07 |
| chr5 | 115956202 | 115957293 | 1092 | 521  | 51  | 85.64  | 5.93  | 0.07 |
| chr5 | 116008966 | 116010158 | 1193 | 594  | 66  | 139    | 8.63  | 0.09 |
| chr5 | 116081465 | 116082290 | 826  | 315  | 45  | 148.96 | 11.17 | 0.1  |

|      |           |           |      |      |     |        |       |      |
|------|-----------|-----------|------|------|-----|--------|-------|------|
| chr5 | 117565306 | 117566666 | 1361 | 851  | 58  | 110.45 | 7.77  | 0.06 |
| chr5 | 117569427 | 117570541 | 1115 | 436  | 53  | 77.45  | 4.9   | 0.12 |
| chr5 | 118605039 | 118605892 | 854  | 444  | 27  | 76.27  | 7.55  | 0.12 |
| chr5 | 119010639 | 119011461 | 823  | 267  | 31  | 91.27  | 6.7   | 0.07 |
| chr5 | 120960708 | 120961767 | 1060 | 534  | 43  | 101.48 | 8.09  | 0.08 |
| chr5 | 121008490 | 121009540 | 1051 | 444  | 44  | 114.64 | 6.88  | 0.06 |
| chr5 | 121009944 | 121010939 | 996  | 500  | 38  | 89.78  | 8.09  | 0.07 |
| chr5 | 121038089 | 121039243 | 1155 | 518  | 59  | 144.31 | 8.09  | 0.09 |
| chr5 | 121641002 | 121641934 | 933  | 550  | 43  | 141.09 | 10.79 | 0.09 |
| chr5 | 121654114 | 121655219 | 1106 | 495  | 57  | 164.99 | 7.72  | 0.06 |
| chr5 | 121847344 | 121848449 | 1106 | 659  | 53  | 157.57 | 6.84  | 0.11 |
| chr5 | 121901285 | 121903285 | 2001 | 1067 | 128 | 164.61 | 7.73  | 0.06 |
| chr5 | 121995051 | 121996580 | 1530 | 872  | 76  | 194.85 | 9.5   | 0    |
| chr5 | 122033927 | 122034864 | 938  | 477  | 34  | 81.73  | 6.39  | 0.1  |
| chr5 | 122110007 | 122110879 | 873  | 423  | 38  | 119.04 | 8.54  | 0.07 |
| chr5 | 122160733 | 122161838 | 1106 | 669  | 42  | 137.5  | 10.86 | 0.09 |
| chr5 | 122285210 | 122288077 | 2868 | 1704 | 179 | 597.55 | 12.14 | 0    |
| chr5 | 122298620 | 122299601 | 982  | 198  | 44  | 124.32 | 6.88  | 0.07 |
| chr5 | 122607485 | 122608544 | 1060 | 651  | 48  | 135.94 | 8.09  | 0.08 |
| chr5 | 122734092 | 122734978 | 887  | 420  | 34  | 93.66  | 7.19  | 0.07 |
| chr5 | 122803831 | 122805249 | 1419 | 876  | 69  | 192.32 | 7.27  | 0    |
| chr5 | 122841400 | 122842540 | 1141 | 566  | 58  | 193.57 | 12.35 | 0    |
| chr5 | 122846121 | 122847566 | 1446 | 968  | 59  | 150.65 | 7.55  | 0.1  |
| chr5 | 122951137 | 122952690 | 1554 | 487  | 61  | 146.27 | 5.66  | 0.09 |
| chr5 | 123156969 | 123158639 | 1671 | 724  | 88  | 95.53  | 4.14  | 0.08 |
| chr5 | 123228480 | 123230145 | 1666 | 556  | 62  | 153.11 | 8.09  | 0.1  |
| chr5 | 123299193 | 123300762 | 1570 | 1042 | 78  | 222.54 | 12.71 | 0    |
| chr5 | 123438288 | 123439699 | 1412 | 977  | 70  | 261.65 | 9.93  | 0    |
| chr5 | 123464561 | 123465887 | 1327 | 510  | 71  | 172.22 | 7.78  | 0.07 |
| chr5 | 123525837 | 123526936 | 1100 | 521  | 47  | 110.42 | 7.72  | 0.06 |
| chr5 | 123585460 | 123587132 | 1673 | 475  | 72  | 174.58 | 6.58  | 0.07 |
| chr5 | 123588328 | 123590402 | 2075 | 1042 | 123 | 434.97 | 10.52 | 0    |
| chr5 | 123590528 | 123592699 | 2172 | 576  | 145 | 578.11 | 10.27 | 0    |
| chr5 | 123599623 | 123600466 | 844  | 197  | 37  | 73.98  | 4.98  | 0.13 |
| chr5 | 123678006 | 123678791 | 786  | 328  | 33  | 122.09 | 10.25 | 0.07 |
| chr5 | 123844094 | 123845781 | 1688 | 708  | 73  | 79.61  | 4.28  | 0.1  |
| chr5 | 123973591 | 123974971 | 1381 | 566  | 67  | 103.69 | 5.82  | 0.06 |
| chr5 | 124170284 | 124171483 | 1200 | 777  | 49  | 122.17 | 5.26  | 0.07 |
| chr5 | 124198700 | 124199819 | 1120 | 653  | 68  | 211.22 | 6.41  | 0    |
| chr5 | 124356768 | 124357706 | 939  | 631  | 41  | 84.85  | 4.85  | 0.06 |
| chr5 | 124380175 | 124381364 | 1190 | 552  | 72  | 267.1  | 12.54 | 0    |
| chr5 | 124565643 | 124566689 | 1047 | 473  | 47  | 106.19 | 10.2  | 0.06 |
| chr5 | 124777158 | 124778189 | 1032 | 552  | 46  | 72.61  | 4.58  | 0.15 |
| chr5 | 124875369 | 124876485 | 1117 | 811  | 53  | 132.71 | 5.63  | 0.08 |

|      |           |           |      |      |     |         |       |      |
|------|-----------|-----------|------|------|-----|---------|-------|------|
| chr5 | 124925253 | 124926306 | 1054 | 524  | 43  | 75.11   | 4.36  | 0.13 |
| chr5 | 124932697 | 124934261 | 1565 | 763  | 100 | 488.88  | 18.88 | 0    |
| chr5 | 125028619 | 125029699 | 1081 | 481  | 97  | 241.06  | 13.29 | 0    |
| chr5 | 125342424 | 125343645 | 1222 | 668  | 51  | 179.07  | 8.63  | 0    |
| chr5 | 125659398 | 125660920 | 1523 | 536  | 73  | 189.81  | 7.36  | 0    |
| chr5 | 125862363 | 125866728 | 4366 | 778  | 201 | 289.85  | 4.32  | 0    |
| chr5 | 125868432 | 125870942 | 2511 | 1622 | 285 | 1265.87 | 16.74 | 0    |
| chr5 | 125871328 | 125874403 | 3076 | 2096 | 170 | 267.98  | 5.62  | 0    |
| chr5 | 125884165 | 125887043 | 2879 | 2316 | 171 | 493.16  | 12.14 | 0    |
| chr5 | 125945873 | 125946800 | 928  | 513  | 38  | 118.53  | 8.09  | 0.07 |
| chr5 | 128095723 | 128096919 | 1197 | 440  | 54  | 106.53  | 5.6   | 0.06 |
| chr5 | 128097192 | 128098142 | 951  | 488  | 40  | 110.04  | 7.51  | 0.06 |
| chr5 | 129525379 | 129526456 | 1078 | 663  | 42  | 88.34   | 4.78  | 0.07 |
| chr5 | 130006557 | 130007767 | 1211 | 438  | 52  | 70.96   | 4.44  | 0.16 |
| chr5 | 130221109 | 130221946 | 838  | 357  | 34  | 93.42   | 9.75  | 0.07 |
| chr5 | 130230329 | 130231627 | 1299 | 561  | 62  | 137.92  | 7.44  | 0.09 |
| chr5 | 130292399 | 130293777 | 1379 | 609  | 62  | 150.93  | 6.99  | 0.1  |
| chr5 | 130322391 | 130323380 | 990  | 488  | 36  | 123.36  | 11.65 | 0.07 |
| chr5 | 130362439 | 130363848 | 1410 | 984  | 62  | 175.64  | 9.37  | 0.07 |
| chr5 | 130416637 | 130418029 | 1393 | 1116 | 56  | 80.69   | 4.91  | 0.1  |
| chr5 | 130477948 | 130479356 | 1409 | 934  | 72  | 93.06   | 5.25  | 0.07 |
| chr5 | 130504756 | 130505813 | 1058 | 658  | 44  | 120.98  | 8.52  | 0.07 |
| chr5 | 130555021 | 130555978 | 958  | 319  | 53  | 175.46  | 9.63  | 0.07 |
| chr5 | 130647034 | 130648535 | 1502 | 418  | 58  | 129.73  | 6.99  | 0.08 |
| chr5 | 130697494 | 130698987 | 1494 | 575  | 64  | 121.43  | 6.47  | 0.07 |
| chr5 | 130729954 | 130731779 | 1826 | 1500 | 86  | 133.88  | 5.74  | 0.08 |
| chr5 | 134575035 | 134575948 | 914  | 492  | 32  | 85.48   | 7.61  | 0.07 |
| chr5 | 134659700 | 134660844 | 1145 | 413  | 55  | 106.44  | 5.2   | 0.06 |
| chr5 | 134704373 | 134705877 | 1505 | 1010 | 68  | 153.1   | 7.99  | 0.1  |
| chr5 | 134789042 | 134791477 | 2436 | 950  | 116 | 194.73  | 6.14  | 0    |
| chr5 | 135028079 | 135028927 | 849  | 465  | 30  | 81.88   | 7.14  | 0.1  |
| chr5 | 135089675 | 135091319 | 1645 | 665  | 70  | 79.09   | 4.41  | 0.1  |
| chr5 | 135114412 | 135115709 | 1298 | 692  | 61  | 176.11  | 8.09  | 0.07 |
| chr5 | 135484544 | 135486262 | 1719 | 689  | 80  | 94.56   | 4.16  | 0.07 |
| chr5 | 135539486 | 135540552 | 1067 | 492  | 76  | 209.99  | 11.74 | 0    |
| chr5 | 135624546 | 135626117 | 1572 | 772  | 82  | 133.18  | 4.66  | 0.08 |
| chr5 | 135643698 | 135645242 | 1545 | 950  | 89  | 146.36  | 5.39  | 0.09 |
| chr5 | 135662173 | 135663902 | 1730 | 500  | 92  | 168.73  | 6     | 0.06 |
| chr5 | 136164604 | 136165629 | 1026 | 408  | 57  | 101.89  | 7.85  | 0.05 |
| chr5 | 136219690 | 136220669 | 980  | 469  | 42  | 94.78   | 5.63  | 0.07 |
| chr5 | 136409533 | 136411473 | 1941 | 1416 | 88  | 147.74  | 5.2   | 0.1  |
| chr5 | 136437608 | 136439318 | 1711 | 1049 | 96  | 173.01  | 5.39  | 0.07 |
| chr5 | 136674332 | 136675329 | 998  | 525  | 57  | 121.81  | 7.31  | 0.07 |
| chr5 | 137042364 | 137044220 | 1857 | 471  | 79  | 164.26  | 4.92  | 0.06 |

|      |           |           |      |      |     |        |      |      |
|------|-----------|-----------|------|------|-----|--------|------|------|
| chr5 | 137428563 | 137429449 | 887  | 397  | 36  | 72.63  | 6.74 | 0.15 |
| chr5 | 137437693 | 137438995 | 1303 | 346  | 65  | 111.56 | 5.22 | 0.06 |
| chr5 | 137462352 | 137463704 | 1353 | 465  | 59  | 76.48  | 3.54 | 0.12 |
| chr5 | 137591377 | 137592565 | 1189 | 774  | 50  | 89.53  | 5.91 | 0.07 |
| chr5 | 137735177 | 137736293 | 1117 | 508  | 60  | 172.26 | 7.04 | 0.07 |
| chr5 | 137748137 | 137749578 | 1442 | 830  | 69  | 122.43 | 5.86 | 0.07 |
| chr5 | 137774270 | 137775250 | 981  | 491  | 37  | 70.99  | 7.39 | 0.16 |
| chr5 | 137942685 | 137944595 | 1911 | 1127 | 108 | 108.82 | 3.96 | 0.06 |
| chr5 | 137971765 | 137973393 | 1629 | 562  | 60  | 139.51 | 8.37 | 0.09 |
| chr5 | 137973807 | 137975572 | 1766 | 762  | 116 | 276.73 | 8.61 | 0    |
| chr5 | 138041349 | 138042993 | 1645 | 609  | 95  | 272.81 | 7.42 | 0    |
| chr5 | 138069006 | 138070998 | 1993 | 1433 | 117 | 232.2  | 9.07 | 0    |
| chr5 | 138071105 | 138072990 | 1886 | 1403 | 95  | 115.39 | 5.25 | 0.06 |
| chr5 | 138125464 | 138126532 | 1069 | 447  | 54  | 96.8   | 6.52 | 0.08 |
| chr5 | 138186558 | 138188729 | 2172 | 535  | 115 | 223.17 | 6.7  | 0    |
| chr5 | 138226711 | 138229559 | 2849 | 1140 | 174 | 430.73 | 8.67 | 0    |
| chr5 | 138557682 | 138558766 | 1085 | 671  | 45  | 130.97 | 7.64 | 0.08 |
| chr5 | 138601741 | 138602793 | 1053 | 561  | 54  | 94.27  | 7.33 | 0.07 |
| chr5 | 138611846 | 138612846 | 1001 | 432  | 49  | 93.98  | 6.97 | 0.07 |
| chr5 | 138627860 | 138629447 | 1588 | 534  | 63  | 92.6   | 5.84 | 0.07 |
| chr5 | 138635454 | 138637154 | 1701 | 740  | 73  | 128.82 | 5.91 | 0.08 |
| chr5 | 138696460 | 138699496 | 3037 | 625  | 141 | 106.76 | 3.35 | 0.06 |
| chr5 | 138704553 | 138705891 | 1339 | 483  | 68  | 167.12 | 6.93 | 0.06 |
| chr5 | 139229623 | 139232604 | 2982 | 1421 | 145 | 276.23 | 7.8  | 0    |
| chr5 | 139471435 | 139472410 | 976  | 438  | 37  | 96.11  | 7    | 0.08 |
| chr5 | 139473523 | 139474711 | 1189 | 706  | 49  | 102.55 | 5.98 | 0.06 |
| chr5 | 139625652 | 139626633 | 982  | 480  | 41  | 74.86  | 5.6  | 0.13 |
| chr5 | 139675961 | 139677212 | 1252 | 722  | 61  | 155.64 | 8.09 | 0.11 |
| chr5 | 139727580 | 139730016 | 2437 | 988  | 101 | 156.18 | 4.55 | 0.11 |
| chr5 | 139800610 | 139801431 | 822  | 418  | 42  | 118.16 | 7.04 | 0.07 |
| chr5 | 139846822 | 139848581 | 1760 | 1258 | 113 | 245.61 | 6.37 | 0    |
| chr5 | 139856009 | 139857553 | 1545 | 623  | 79  | 161.27 | 5.78 | 0.11 |
| chr5 | 139959718 | 139961113 | 1396 | 806  | 94  | 167.06 | 7.48 | 0.06 |
| chr5 | 140797197 | 140798008 | 812  | 440  | 29  | 92.74  | 8.63 | 0.07 |
| chr5 | 140812314 | 140813153 | 840  | 266  | 31  | 76.92  | 5.51 | 0.12 |
| chr5 | 140893849 | 140895866 | 2018 | 805  | 112 | 195.99 | 5.64 | 0    |
| chr5 | 141082869 | 141085148 | 2280 | 530  | 127 | 327.49 | 9.06 | 0    |
| chr5 | 141085224 | 141086161 | 938  | 464  | 44  | 121.18 | 7.18 | 0.07 |
| chr5 | 141086426 | 141087505 | 1080 | 634  | 43  | 102.85 | 5.95 | 0.06 |
| chr5 | 141092314 | 141094620 | 2307 | 1762 | 147 | 325.04 | 7.33 | 0    |
| chr5 | 141094911 | 141096037 | 1127 | 602  | 46  | 70.73  | 5.39 | 0.16 |
| chr5 | 141177609 | 141178560 | 952  | 515  | 44  | 118.4  | 7.9  | 0.07 |
| chr5 | 141180143 | 141181505 | 1363 | 838  | 87  | 101.76 | 4.38 | 0.05 |
| chr5 | 141240440 | 141241785 | 1346 | 518  | 68  | 124.78 | 4.85 | 0.07 |

|      |           |           |      |      |     |         |       |      |
|------|-----------|-----------|------|------|-----|---------|-------|------|
| chr5 | 142939351 | 142940546 | 1196 | 425  | 70  | 138.51  | 6.62  | 0.09 |
| chr5 | 143529456 | 143530124 | 669  | 321  | 22  | 72.7    | 6.93  | 0.15 |
| chr5 | 143576054 | 143585521 | 9468 | 3813 | 707 | 2534.99 | 14.54 | 0    |
| chr5 | 143662927 | 143665019 | 2093 | 1313 | 135 | 129.09  | 3.58  | 0.08 |
| chr5 | 143666287 | 143669154 | 2868 | 1409 | 264 | 798.52  | 11.24 | 0    |
| chr5 | 143690464 | 143691554 | 1091 | 488  | 55  | 98.04   | 6.52  | 0.08 |
| chr5 | 143693539 | 143694595 | 1057 | 581  | 44  | 100.72  | 5.52  | 0.08 |
| chr5 | 143874041 | 143875101 | 1061 | 574  | 58  | 162.27  | 9.78  | 0.11 |
| chr5 | 144031532 | 144032240 | 709  | 232  | 39  | 126.2   | 10.3  | 0.07 |
| chr5 | 144090240 | 144091324 | 1085 | 671  | 55  | 224.7   | 13.66 | 0    |
| chr5 | 144165212 | 144165791 | 580  | 355  | 23  | 74.83   | 8.09  | 0.13 |
| chr5 | 144224761 | 144226155 | 1395 | 724  | 71  | 229.12  | 10.45 | 0    |
| chr5 | 144287275 | 144289574 | 2300 | 1729 | 118 | 289.99  | 7.08  | 0    |
| chr5 | 144775090 | 144776099 | 1010 | 526  | 44  | 127.67  | 7.24  | 0.07 |
| chr5 | 144982268 | 144982972 | 705  | 362  | 25  | 72.22   | 6.3   | 0.15 |
| chr5 | 145015603 | 145017566 | 1964 | 1425 | 102 | 208.62  | 5.78  | 0    |
| chr5 | 145874539 | 145876446 | 1908 | 667  | 111 | 199.77  | 7.61  | 0    |
| chr5 | 145876852 | 145878129 | 1278 | 742  | 56  | 153.8   | 6.6   | 0.1  |
| chr5 | 145900467 | 145901971 | 1505 | 716  | 97  | 264.16  | 10.4  | 0    |
| chr5 | 145927621 | 145928460 | 840  | 289  | 41  | 98.75   | 7.44  | 0.08 |
| chr5 | 145961892 | 145963009 | 1118 | 825  | 44  | 99.42   | 7.32  | 0.08 |
| chr5 | 145964539 | 145965790 | 1252 | 367  | 47  | 80.52   | 4.38  | 0.1  |
| chr5 | 145992046 | 145992980 | 935  | 442  | 46  | 104.68  | 5.91  | 0.06 |
| chr5 | 146041062 | 146041832 | 771  | 388  | 27  | 74.24   | 6.19  | 0.13 |
| chr5 | 147032349 | 147033347 | 999  | 589  | 54  | 192.85  | 11.07 | 0    |
| chr5 | 147072318 | 147073377 | 1060 | 298  | 127 | 112.46  | 5.02  | 0.06 |
| chr5 | 147644087 | 147645336 | 1250 | 449  | 82  | 115.52  | 5.75  | 0.06 |
| chr5 | 147759615 | 147760730 | 1116 | 619  | 51  | 97.68   | 6.59  | 0.08 |
| chr5 | 147887518 | 147888557 | 1040 | 587  | 48  | 99.4    | 7.16  | 0.08 |
| chr5 | 148241139 | 148242928 | 1790 | 753  | 90  | 272.38  | 9.3   | 0    |
| chr5 | 148705813 | 148707185 | 1373 | 553  | 71  | 134.42  | 5.93  | 0.08 |
| chr5 | 149363424 | 149364699 | 1276 | 930  | 62  | 179.55  | 7.28  | 0    |
| chr5 | 149862851 | 149863929 | 1079 | 551  | 60  | 286.9   | 16.89 | 0    |
| chr5 | 149864212 | 149864976 | 765  | 235  | 29  | 99.9    | 7.57  | 0.08 |
| chr5 | 149994760 | 149996400 | 1641 | 1005 | 85  | 166.89  | 7.53  | 0.06 |
| chr5 | 150040098 | 150041344 | 1247 | 457  | 62  | 145.68  | 8.74  | 0.09 |
| chr5 | 150076361 | 150077369 | 1009 | 494  | 41  | 91.74   | 6.99  | 0.07 |
| chr5 | 150078265 | 150079630 | 1366 | 576  | 61  | 82.32   | 4.8   | 0.11 |
| chr5 | 151324422 | 151325562 | 1141 | 724  | 55  | 125.61  | 7.44  | 0.07 |
| chr5 | 151395830 | 151396823 | 994  | 198  | 36  | 86.85   | 4.3   | 0.07 |
| chr5 | 151467797 | 151468648 | 852  | 387  | 35  | 76.67   | 5.28  | 0.12 |
| chr5 | 152170475 | 152172072 | 1598 | 383  | 71  | 140.71  | 5.18  | 0.09 |
| chr5 | 152453270 | 152454186 | 917  | 461  | 34  | 103.16  | 7.59  | 0.06 |
| chr6 | 4550369   | 4551278   | 910  | 410  | 33  | 74.53   | 7.28  | 0.13 |

|      |          |          |      |      |     |        |       |      |
|------|----------|----------|------|------|-----|--------|-------|------|
| chr6 | 6527520  | 6528960  | 1441 | 926  | 66  | 161.61 | 6.92  | 0.11 |
| chr6 | 8158860  | 8159882  | 1023 | 509  | 45  | 180.62 | 13.98 | 0    |
| chr6 | 8208581  | 8209861  | 1281 | 534  | 54  | 108.46 | 5.39  | 0.06 |
| chr6 | 8459074  | 8460033  | 960  | 394  | 51  | 189.64 | 10.34 | 0    |
| chr6 | 11857169 | 11858104 | 936  | 196  | 47  | 99.04  | 4.62  | 0.08 |
| chr6 | 11875512 | 11876635 | 1124 | 399  | 46  | 172.38 | 10.49 | 0.07 |
| chr6 | 13019330 | 13020392 | 1063 | 528  | 49  | 95.59  | 6.59  | 0.08 |
| chr6 | 13557463 | 13558481 | 1019 | 560  | 45  | 179.97 | 12.14 | 0    |
| chr6 | 13820736 | 13822664 | 1929 | 1582 | 93  | 326.87 | 9.75  | 0    |
| chr6 | 15677396 | 15678784 | 1389 | 937  | 54  | 109.42 | 5.15  | 0.06 |
| chr6 | 17230890 | 17231939 | 1050 | 368  | 41  | 112.51 | 5.84  | 0.06 |
| chr6 | 17586556 | 17588052 | 1497 | 515  | 61  | 188.68 | 8.93  | 0    |
| chr6 | 18798064 | 18798989 | 926  | 427  | 38  | 95.4   | 7.49  | 0.08 |
| chr6 | 21898986 | 21900386 | 1401 | 394  | 66  | 104.52 | 5.27  | 0.06 |
| chr6 | 24614509 | 24615715 | 1207 | 559  | 53  | 100.65 | 5.29  | 0.08 |
| chr6 | 28211490 | 28212707 | 1218 | 509  | 50  | 97.54  | 5.39  | 0.08 |
| chr6 | 28373103 | 28374404 | 1302 | 719  | 60  | 168.63 | 7.65  | 0.06 |
| chr6 | 29476030 | 29479755 | 3726 | 765  | 205 | 475.45 | 8.14  | 0    |
| chr6 | 29486479 | 29487307 | 829  | 428  | 34  | 70.34  | 5.06  | 0.16 |
| chr6 | 29488727 | 29489785 | 1059 | 304  | 37  | 88.6   | 4.68  | 0.07 |
| chr6 | 29997211 | 29998550 | 1340 | 642  | 79  | 362.54 | 14.9  | 0    |
| chr6 | 30254373 | 30254929 | 557  | 215  | 24  | 79.62  | 8.09  | 0.1  |
| chr6 | 30459172 | 30460343 | 1172 | 505  | 60  | 201.15 | 9.79  | 0    |
| chr6 | 30846512 | 30847363 | 852  | 361  | 38  | 156.99 | 12.82 | 0.11 |
| chr6 | 31075661 | 31077608 | 1948 | 1452 | 81  | 178.21 | 6.38  | 0    |
| chr6 | 31169795 | 31170853 | 1059 | 505  | 42  | 90.57  | 5.88  | 0.07 |
| chr6 | 31348486 | 31349264 | 779  | 318  | 29  | 90.47  | 8.09  | 0.07 |
| chr6 | 34730092 | 34731340 | 1249 | 434  | 52  | 123.99 | 8.09  | 0.07 |
| chr6 | 34812581 | 34813666 | 1086 | 544  | 47  | 132.73 | 9.69  | 0.08 |
| chr6 | 34827516 | 34828653 | 1138 | 476  | 62  | 116.91 | 7.08  | 0.07 |
| chr6 | 34857533 | 34858569 | 1037 | 374  | 39  | 78.87  | 5.15  | 0.12 |
| chr6 | 34860045 | 34861209 | 1165 | 477  | 61  | 132.1  | 5.78  | 0.08 |
| chr6 | 35083333 | 35084316 | 984  | 482  | 41  | 74.62  | 5.29  | 0.13 |
| chr6 | 35127182 | 35127945 | 764  | 321  | 36  | 116.64 | 10.65 | 0.07 |
| chr6 | 35202255 | 35203427 | 1173 | 572  | 64  | 104.44 | 6.01  | 0.06 |
| chr6 | 38303754 | 38305144 | 1391 | 736  | 76  | 218.27 | 8.79  | 0    |
| chr6 | 38382991 | 38384174 | 1184 | 680  | 75  | 100.02 | 5.03  | 0.08 |
| chr6 | 38482728 | 38484448 | 1721 | 1167 | 109 | 282.99 | 9.82  | 0    |
| chr6 | 38500489 | 38502114 | 1626 | 711  | 87  | 178.77 | 5.58  | 0    |
| chr6 | 38825036 | 38826036 | 1001 | 233  | 36  | 86.07  | 4.73  | 0.07 |
| chr6 | 38868399 | 38869501 | 1103 | 543  | 47  | 131.95 | 6.81  | 0.08 |
| chr6 | 39067397 | 39068752 | 1356 | 792  | 56  | 102.06 | 4.85  | 0.05 |
| chr6 | 39155030 | 39156847 | 1818 | 1179 | 95  | 293.29 | 7.95  | 0    |
| chr6 | 39369580 | 39370716 | 1137 | 526  | 58  | 194.27 | 8.94  | 0    |

|      |          |          |      |      |     |        |       |      |
|------|----------|----------|------|------|-----|--------|-------|------|
| chr6 | 39542033 | 39543247 | 1215 | 458  | 63  | 104.38 | 6.37  | 0.06 |
| chr6 | 39674756 | 39676089 | 1334 | 820  | 67  | 195.8  | 12.71 | 0    |
| chr6 | 40420908 | 40422043 | 1136 | 596  | 53  | 104.17 | 6.29  | 0.06 |
| chr6 | 42214445 | 42215601 | 1157 | 876  | 43  | 90.04  | 4.62  | 0.07 |
| chr6 | 42299121 | 42300791 | 1671 | 953  | 98  | 260.31 | 8.09  | 0    |
| chr6 | 47403478 | 47404948 | 1471 | 913  | 71  | 268.71 | 11.38 | 0    |
| chr6 | 47600368 | 47601680 | 1313 | 496  | 69  | 109.98 | 5.95  | 0.06 |
| chr6 | 47731027 | 47731895 | 869  | 454  | 31  | 106.24 | 10.49 | 0.06 |
| chr6 | 47737755 | 47738933 | 1179 | 717  | 51  | 100.94 | 5.5   | 0.08 |
| chr6 | 47762772 | 47764078 | 1307 | 937  | 62  | 94.41  | 4.7   | 0.07 |
| chr6 | 47785364 | 47786227 | 864  | 309  | 41  | 105.89 | 7.39  | 0.06 |
| chr6 | 48393698 | 48395198 | 1501 | 311  | 56  | 94.87  | 5.63  | 0.07 |
| chr6 | 48395238 | 48396322 | 1085 | 327  | 39  | 97.36  | 5.84  | 0.08 |
| chr6 | 48504253 | 48505619 | 1367 | 511  | 71  | 157.47 | 6.89  | 0.11 |
| chr6 | 48543346 | 48544426 | 1081 | 517  | 48  | 132.87 | 8.09  | 0.08 |
| chr6 | 48962082 | 48963515 | 1434 | 872  | 57  | 104.07 | 4.72  | 0.06 |
| chr6 | 48985534 | 48990920 | 5387 | 1269 | 366 | 891.81 | 10.96 | 0    |
| chr6 | 48997638 | 48999871 | 2234 | 909  | 89  | 217.23 | 6.39  | 0    |
| chr6 | 49000846 | 49002648 | 1803 | 1065 | 72  | 151.69 | 5.63  | 0.1  |
| chr6 | 49003306 | 49004298 | 993  | 584  | 40  | 129.15 | 7.54  | 0.08 |
| chr6 | 49007088 | 49007758 | 671  | 194  | 24  | 70.07  | 5.78  | 0.16 |
| chr6 | 49010344 | 49012756 | 2413 | 580  | 123 | 357.2  | 7.03  | 0    |
| chr6 | 49013742 | 49014644 | 903  | 451  | 33  | 70.43  | 5.78  | 0.16 |
| chr6 | 49023397 | 49024875 | 1479 | 424  | 70  | 241.21 | 11.49 | 0    |
| chr6 | 51123934 | 51124904 | 971  | 468  | 36  | 113.8  | 9.52  | 0.06 |
| chr6 | 51407298 | 51408325 | 1028 | 642  | 38  | 101.97 | 6.01  | 0.05 |
| chr6 | 51418081 | 51420377 | 2297 | 1742 | 151 | 239.18 | 8.88  | 0    |
| chr6 | 51420490 | 51421529 | 1040 | 506  | 43  | 138.81 | 8.39  | 0.09 |
| chr6 | 51961627 | 51963196 | 1570 | 1021 | 87  | 190.95 | 7.06  | 0    |
| chr6 | 52141661 | 52142587 | 927  | 390  | 42  | 172.97 | 13.29 | 0.07 |
| chr6 | 52663328 | 52664714 | 1387 | 1009 | 60  | 162.54 | 6.23  | 0.12 |
| chr6 | 54766031 | 54767147 | 1117 | 638  | 51  | 109.09 | 6.47  | 0.06 |
| chr6 | 54767205 | 54768229 | 1025 | 469  | 54  | 204.72 | 9.76  | 0    |
| chr6 | 54987087 | 54988535 | 1449 | 949  | 64  | 112.99 | 5.99  | 0.06 |
| chr6 | 56654299 | 56655002 | 704  | 322  | 26  | 76.55  | 6.66  | 0.12 |
| chr6 | 56664274 | 56665169 | 896  | 566  | 34  | 76.05  | 4.62  | 0.12 |
| chr6 | 56747202 | 56748392 | 1191 | 459  | 57  | 212.71 | 9.61  | 0    |
| chr6 | 56873356 | 56874305 | 950  | 450  | 37  | 79.33  | 5.52  | 0.1  |
| chr6 | 57530725 | 57531636 | 912  | 386  | 32  | 85.71  | 6.19  | 0.07 |
| chr6 | 58781192 | 58782007 | 816  | 358  | 28  | 92.82  | 10.98 | 0.07 |
| chr6 | 64992213 | 64993154 | 942  | 385  | 36  | 91.1   | 7.62  | 0.07 |
| chr6 | 66846238 | 66847136 | 899  | 514  | 35  | 101.68 | 7.9   | 0.08 |
| chr6 | 70741659 | 70742750 | 1092 | 587  | 56  | 125.06 | 6.59  | 0.07 |
| chr6 | 70793507 | 70795310 | 1804 | 528  | 88  | 165.91 | 5.2   | 0.06 |

|      |          |          |      |      |     |        |       |      |
|------|----------|----------|------|------|-----|--------|-------|------|
| chr6 | 71220019 | 71222434 | 2416 | 1897 | 122 | 320.67 | 7.6   | 0    |
| chr6 | 71389726 | 71391703 | 1978 | 1351 | 118 | 210.15 | 6.24  | 0    |
| chr6 | 71443396 | 71445099 | 1704 | 544  | 102 | 413.48 | 19.76 | 0    |
| chr6 | 71493632 | 71494880 | 1249 | 438  | 70  | 163.98 | 5.49  | 0.06 |
| chr6 | 71582439 | 71583906 | 1468 | 600  | 66  | 100.29 | 4.85  | 0.08 |
| chr6 | 71780738 | 71782331 | 1594 | 453  | 92  | 264.53 | 7.08  | 0    |
| chr6 | 72304981 | 72305982 | 1002 | 529  | 41  | 124.21 | 9.82  | 0.07 |
| chr6 | 72311895 | 72312806 | 912  | 622  | 37  | 89.22  | 5.78  | 0.07 |
| chr6 | 72339076 | 72340910 | 1835 | 1064 | 93  | 228.36 | 6.07  | 0    |
| chr6 | 72388474 | 72390883 | 2410 | 1152 | 141 | 229.52 | 5.84  | 0    |
| chr6 | 72462292 | 72463312 | 1021 | 492  | 49  | 82.02  | 6.26  | 0.1  |
| chr6 | 72498585 | 72501153 | 2569 | 556  | 158 | 375.5  | 8.31  | 0    |
| chr6 | 72501987 | 72503367 | 1381 | 885  | 67  | 166.74 | 7.67  | 0.06 |
| chr6 | 72907628 | 72908831 | 1204 | 739  | 45  | 88.21  | 6.25  | 0.07 |
| chr6 | 73160413 | 73161305 | 893  | 351  | 33  | 93.53  | 6.19  | 0.07 |
| chr6 | 73198151 | 73199248 | 1098 | 689  | 45  | 83.58  | 5.5   | 0.06 |
| chr6 | 82602139 | 82603498 | 1360 | 648  | 66  | 175.7  | 6.99  | 0.07 |
| chr6 | 82982883 | 82983968 | 1086 | 506  | 58  | 183.54 | 9.25  | 0    |
| chr6 | 83003448 | 83005234 | 1787 | 1104 | 75  | 87.16  | 5.09  | 0.07 |
| chr6 | 83027481 | 83028922 | 1442 | 1242 | 67  | 76.35  | 3.37  | 0.12 |
| chr6 | 83037120 | 83037883 | 764  | 408  | 25  | 71.74  | 7.83  | 0.15 |
| chr6 | 83065024 | 83065964 | 941  | 383  | 47  | 76.28  | 7.36  | 0.12 |
| chr6 | 83070978 | 83072057 | 1080 | 670  | 61  | 88.15  | 5.19  | 0.07 |
| chr6 | 83115395 | 83116366 | 972  | 379  | 48  | 160.79 | 10.38 | 0.11 |
| chr6 | 83275549 | 83276551 | 1003 | 473  | 42  | 103.6  | 8.48  | 0.06 |
| chr6 | 83298778 | 83299961 | 1184 | 699  | 55  | 212.62 | 11.33 | 0    |
| chr6 | 83391189 | 83392252 | 1064 | 536  | 42  | 95.9   | 8.09  | 0.08 |
| chr6 | 83405312 | 83407709 | 2398 | 1585 | 166 | 642.64 | 10.02 | 0    |
| chr6 | 83456298 | 83457438 | 1141 | 637  | 60  | 102.36 | 5.88  | 0.05 |
| chr6 | 83725489 | 83726252 | 764  | 220  | 35  | 75.24  | 6.53  | 0.13 |
| chr6 | 83744646 | 83746087 | 1442 | 579  | 74  | 101.23 | 5.62  | 0.08 |
| chr6 | 83864123 | 83865245 | 1123 | 329  | 52  | 101.31 | 5.99  | 0.08 |
| chr6 | 85087305 | 85088152 | 848  | 448  | 44  | 191.15 | 13.48 | 0    |
| chr6 | 85282339 | 85284017 | 1679 | 1107 | 87  | 162.04 | 7.01  | 0.11 |
| chr6 | 85323775 | 85325288 | 1514 | 1014 | 61  | 92.96  | 3.9   | 0.07 |
| chr6 | 85865314 | 85865971 | 658  | 295  | 23  | 80.26  | 8.67  | 0.1  |
| chr6 | 86353454 | 86354989 | 1536 | 419  | 88  | 263.99 | 8.79  | 0    |
| chr6 | 86387969 | 86389310 | 1342 | 652  | 83  | 208.07 | 8.37  | 0    |
| chr6 | 86436892 | 86438392 | 1501 | 739  | 77  | 122.39 | 4.9   | 0.07 |
| chr6 | 86475156 | 86478196 | 3041 | 1606 | 233 | 573.52 | 8.55  | 0    |
| chr6 | 86534611 | 86535910 | 1300 | 676  | 56  | 90.98  | 4.62  | 0.07 |
| chr6 | 86618875 | 86619830 | 956  | 521  | 41  | 92.93  | 5.28  | 0.07 |
| chr6 | 86634083 | 86635034 | 952  | 406  | 45  | 108.27 | 8.09  | 0.06 |
| chr6 | 86798692 | 86800014 | 1323 | 660  | 58  | 115.22 | 6.47  | 0.06 |

|      |           |           |      |      |     |        |       |      |
|------|-----------|-----------|------|------|-----|--------|-------|------|
| chr6 | 86959399  | 86960597  | 1199 | 464  | 57  | 73.82  | 4.39  | 0.13 |
| chr6 | 87490739  | 87492738  | 2000 | 1472 | 83  | 89.93  | 3.43  | 0.07 |
| chr6 | 87621505  | 87622699  | 1195 | 414  | 51  | 77.87  | 5.3   | 0.12 |
| chr6 | 87760545  | 87762341  | 1797 | 1202 | 89  | 124.09 | 6.19  | 0.07 |
| chr6 | 87788082  | 87789435  | 1354 | 859  | 75  | 111.99 | 5.03  | 0.06 |
| chr6 | 87800075  | 87801734  | 1660 | 877  | 95  | 234.05 | 7.49  | 0    |
| chr6 | 87994584  | 87995656  | 1073 | 590  | 50  | 116.54 | 7.75  | 0.07 |
| chr6 | 88468400  | 88469464  | 1065 | 616  | 58  | 127.03 | 6.97  | 0.07 |
| chr6 | 88791440  | 88793164  | 1725 | 578  | 78  | 110.63 | 4.18  | 0.06 |
| chr6 | 88851678  | 88855025  | 3348 | 632  | 136 | 181.04 | 5.78  | 0    |
| chr6 | 89206568  | 89208995  | 2428 | 1637 | 111 | 225    | 6.55  | 0    |
| chr6 | 90319140  | 90320120  | 981  | 501  | 37  | 92.37  | 8.09  | 0.07 |
| chr6 | 91390466  | 91391470  | 1005 | 425  | 63  | 145.81 | 8.87  | 0.09 |
| chr6 | 91422793  | 91424367  | 1575 | 782  | 87  | 104.52 | 4.34  | 0.06 |
| chr6 | 91465303  | 91466697  | 1395 | 498  | 62  | 166.73 | 8.06  | 0.06 |
| chr6 | 91628416  | 91629481  | 1066 | 345  | 39  | 106.71 | 6.66  | 0.06 |
| chr6 | 91633428  | 91635562  | 2135 | 759  | 123 | 205.18 | 5.53  | 0    |
| chr6 | 91827536  | 91828672  | 1137 | 620  | 48  | 92.38  | 5.5   | 0.07 |
| chr6 | 92040951  | 92042641  | 1691 | 1183 | 77  | 176.29 | 6.33  | 0.07 |
| chr6 | 94449910  | 94450836  | 927  | 542  | 39  | 92.08  | 5.15  | 0.07 |
| chr6 | 97128460  | 97129483  | 1024 | 436  | 38  | 99.07  | 6.74  | 0.08 |
| chr6 | 97160855  | 97162332  | 1478 | 1278 | 56  | 113.41 | 4.78  | 0.06 |
| chr6 | 97756472  | 97757320  | 849  | 449  | 32  | 89.3   | 8.24  | 0.07 |
| chr6 | 97770003  | 97771114  | 1112 | 439  | 41  | 94.59  | 4.78  | 0.07 |
| chr6 | 99471209  | 99473631  | 2423 | 1920 | 115 | 385.92 | 8.61  | 0    |
| chr6 | 103598888 | 103599762 | 875  | 213  | 132 | 73.17  | 5.28  | 0.13 |
| chr6 | 106718578 | 106719681 | 1104 | 576  | 67  | 174.36 | 9.54  | 0.07 |
| chr6 | 108014743 | 108015752 | 1010 | 568  | 41  | 110.49 | 8.09  | 0.06 |
| chr6 | 108135009 | 108135852 | 844  | 445  | 38  | 109.94 | 7.69  | 0.06 |
| chr6 | 108732645 | 108733673 | 1029 | 464  | 46  | 128.95 | 8.5   | 0.08 |
| chr6 | 108777792 | 108779308 | 1517 | 938  | 88  | 309.63 | 11.33 | 0    |
| chr6 | 113025697 | 113027846 | 2150 | 1505 | 157 | 412.84 | 8.85  | 0    |
| chr6 | 113187352 | 113188144 | 793  | 247  | 36  | 72.02  | 5.99  | 0.15 |
| chr6 | 113256070 | 113258815 | 2746 | 531  | 133 | 99.95  | 5.08  | 0.08 |
| chr6 | 113276241 | 113277668 | 1428 | 571  | 74  | 79.45  | 4.34  | 0.1  |
| chr6 | 113292991 | 113294418 | 1428 | 887  | 69  | 164.8  | 8.16  | 0.06 |
| chr6 | 113327022 | 113328750 | 1729 | 1175 | 96  | 170.17 | 6.37  | 0.06 |
| chr6 | 113328866 | 113329865 | 1000 | 529  | 37  | 85.98  | 8.62  | 0.07 |
| chr6 | 113432977 | 113434104 | 1128 | 564  | 54  | 144.12 | 6.99  | 0.09 |
| chr6 | 113444095 | 113445146 | 1052 | 768  | 43  | 70.85  | 5.09  | 0.16 |
| chr6 | 113480913 | 113482147 | 1235 | 704  | 73  | 340.73 | 22.65 | 0    |
| chr6 | 113645832 | 113647850 | 2019 | 1285 | 110 | 239.54 | 10.69 | 0    |
| chr6 | 114592469 | 114593625 | 1157 | 608  | 55  | 84.39  | 6.07  | 0.06 |
| chr6 | 114871361 | 114872228 | 868  | 474  | 42  | 169.46 | 11.1  | 0.06 |

|      |           |           |      |      |     |         |       |      |
|------|-----------|-----------|------|------|-----|---------|-------|------|
| chr6 | 115310727 | 115311685 | 959  | 521  | 35  | 73.8    | 6.16  | 0.13 |
| chr6 | 115625469 | 115627232 | 1764 | 1293 | 103 | 354.54  | 11.1  | 0    |
| chr6 | 115758168 | 115759363 | 1196 | 546  | 52  | 170.34  | 8.24  | 0.06 |
| chr6 | 116157526 | 116158571 | 1046 | 478  | 53  | 86.5    | 4.9   | 0.07 |
| chr6 | 116618614 | 116619586 | 973  | 673  | 40  | 73.78   | 4.76  | 0.13 |
| chr6 | 116621909 | 116624799 | 2891 | 2537 | 130 | 231.14  | 4.61  | 0    |
| chr6 | 116668662 | 116669618 | 957  | 420  | 40  | 111.94  | 8.52  | 0.06 |
| chr6 | 117828760 | 117831110 | 2351 | 840  | 138 | 196.59  | 6.64  | 0    |
| chr6 | 117856313 | 117858441 | 2129 | 1557 | 142 | 448.14  | 9.71  | 0    |
| chr6 | 117866591 | 117867929 | 1339 | 515  | 59  | 149.24  | 6.93  | 0.1  |
| chr6 | 118088698 | 118089599 | 902  | 482  | 41  | 118.77  | 7.28  | 0.07 |
| chr6 | 118368942 | 118369977 | 1036 | 518  | 44  | 116.67  | 8.9   | 0.07 |
| chr6 | 119124987 | 119125960 | 974  | 515  | 38  | 81.32   | 5.88  | 0.1  |
| chr6 | 119338410 | 119339332 | 923  | 504  | 38  | 143.95  | 8.03  | 0.09 |
| chr6 | 119797572 | 119798971 | 1400 | 473  | 59  | 150.03  | 5.66  | 0.1  |
| chr6 | 119852108 | 119853128 | 1021 | 517  | 39  | 128.65  | 8.09  | 0.08 |
| chr6 | 119986751 | 119990008 | 3258 | 545  | 137 | 302.17  | 7.36  | 0    |
| chr6 | 120061962 | 120063036 | 1075 | 242  | 39  | 98.5    | 4.94  | 0.08 |
| chr6 | 120313522 | 120314707 | 1186 | 648  | 62  | 104.32  | 6.13  | 0.06 |
| chr6 | 120771891 | 120773130 | 1240 | 797  | 53  | 177.99  | 8.09  | 0.07 |
| chr6 | 120785911 | 120786766 | 856  | 348  | 46  | 129.22  | 7.42  | 0.08 |
| chr6 | 122289937 | 122290903 | 967  | 580  | 34  | 84.25   | 5.84  | 0.06 |
| chr6 | 122525705 | 122527321 | 1617 | 1001 | 79  | 150.76  | 5.49  | 0.1  |
| chr6 | 122531165 | 122536537 | 5373 | 1308 | 309 | 728.29  | 7.19  | 0    |
| chr6 | 122537207 | 122538383 | 1177 | 717  | 43  | 129.05  | 7.31  | 0.08 |
| chr6 | 122538458 | 122539498 | 1041 | 473  | 42  | 133.31  | 7.45  | 0.08 |
| chr6 | 122543013 | 122544007 | 995  | 513  | 38  | 73.94   | 5.63  | 0.13 |
| chr6 | 122544062 | 122546336 | 2275 | 1821 | 120 | 318.11  | 9.42  | 0    |
| chr6 | 122546408 | 122553451 | 7044 | 1832 | 575 | 1600.73 | 9.32  | 0    |
| chr6 | 122553635 | 122555020 | 1386 | 775  | 70  | 266.1   | 11.91 | 0    |
| chr6 | 122603812 | 122605324 | 1513 | 508  | 61  | 76.56   | 4.32  | 0.12 |
| chr6 | 122610175 | 122611011 | 837  | 240  | 32  | 102.01  | 7.55  | 0.05 |
| chr6 | 122760314 | 122762386 | 2073 | 1128 | 117 | 230.67  | 6.52  | 0    |
| chr6 | 122769514 | 122770677 | 1164 | 535  | 42  | 103.41  | 6.97  | 0.06 |
| chr6 | 122796236 | 122798210 | 1975 | 1415 | 97  | 228.02  | 7.08  | 0    |
| chr6 | 122802334 | 122806635 | 4302 | 3725 | 273 | 836.29  | 11.46 | 0    |
| chr6 | 122824137 | 122825021 | 885  | 441  | 33  | 72.43   | 7.71  | 0.15 |
| chr6 | 122871072 | 122872033 | 962  | 624  | 42  | 77.21   | 3.9   | 0.12 |
| chr6 | 123072535 | 123073906 | 1372 | 986  | 51  | 76.52   | 4.49  | 0.12 |
| chr6 | 123211332 | 123216600 | 5269 | 1944 | 257 | 607.21  | 9.55  | 0    |
| chr6 | 124661707 | 124662835 | 1129 | 575  | 59  | 104.91  | 5.31  | 0.06 |
| chr6 | 124682163 | 124683659 | 1497 | 1020 | 69  | 121.98  | 6.36  | 0.07 |
| chr6 | 124689688 | 124691935 | 2248 | 1386 | 132 | 249.5   | 6.86  | 0    |
| chr6 | 124694962 | 124696747 | 1786 | 532  | 90  | 168.69  | 6.97  | 0.06 |

|      |           |           |      |      |     |        |       |      |
|------|-----------|-----------|------|------|-----|--------|-------|------|
| chr6 | 124754966 | 124756672 | 1707 | 734  | 84  | 116.46 | 5.95  | 0.07 |
| chr6 | 124758297 | 124760141 | 1845 | 611  | 90  | 188.73 | 7.77  | 0    |
| chr6 | 124778046 | 124780375 | 2330 | 769  | 105 | 112.18 | 4.39  | 0.06 |
| chr6 | 124806867 | 124807828 | 962  | 305  | 42  | 113.73 | 5.98  | 0.06 |
| chr6 | 124867101 | 124868524 | 1424 | 900  | 53  | 108.86 | 6.19  | 0.06 |
| chr6 | 124880370 | 124882067 | 1698 | 976  | 95  | 276.2  | 7.74  | 0    |
| chr6 | 124915009 | 124916352 | 1344 | 511  | 91  | 233.48 | 7.57  | 0    |
| chr6 | 124958195 | 124960619 | 2425 | 759  | 123 | 281.64 | 6.8   | 0    |
| chr6 | 124988996 | 124990916 | 1921 | 682  | 100 | 266.38 | 7.74  | 0    |
| chr6 | 125045608 | 125047239 | 1632 | 785  | 70  | 203.01 | 7.19  | 0    |
| chr6 | 125114307 | 125117225 | 2919 | 1283 | 144 | 225.85 | 5.22  | 0    |
| chr6 | 125165024 | 125166112 | 1089 | 551  | 51  | 86.03  | 6.2   | 0.07 |
| chr6 | 125181247 | 125182243 | 997  | 495  | 38  | 89.66  | 7.28  | 0.07 |
| chr6 | 125203756 | 125204659 | 904  | 537  | 36  | 79.34  | 5.12  | 0.1  |
| chr6 | 125263300 | 125264561 | 1262 | 695  | 77  | 190.85 | 7.81  | 0    |
| chr6 | 125299483 | 125301079 | 1597 | 993  | 73  | 178.85 | 5.88  | 0    |
| chr6 | 125376279 | 125377255 | 977  | 454  | 41  | 80.08  | 7.12  | 0.1  |
| chr6 | 125522451 | 125523853 | 1403 | 950  | 55  | 70.99  | 5.02  | 0.16 |
| chr6 | 127402889 | 127404330 | 1442 | 1115 | 63  | 97.19  | 5.58  | 0.08 |
| chr6 | 128374343 | 128375300 | 958  | 444  | 42  | 82.27  | 6.85  | 0.1  |
| chr6 | 128388301 | 128388999 | 699  | 466  | 25  | 76.52  | 6.07  | 0.12 |
| chr6 | 128709883 | 128711217 | 1335 | 930  | 44  | 89.22  | 8.52  | 0.07 |
| chr6 | 128713772 | 128714729 | 958  | 469  | 47  | 95.8   | 8.67  | 0.08 |
| chr6 | 128749256 | 128749951 | 696  | 338  | 31  | 116.37 | 11.77 | 0.07 |
| chr6 | 128752665 | 128753638 | 974  | 464  | 56  | 84.56  | 6.02  | 0.06 |
| chr6 | 128788079 | 128789847 | 1769 | 979  | 74  | 134.31 | 6.51  | 0.08 |
| chr6 | 129130332 | 129133429 | 3098 | 1516 | 211 | 732.15 | 10.55 | 0    |
| chr6 | 129136758 | 129137844 | 1087 | 658  | 44  | 145.64 | 8.28  | 0.09 |
| chr6 | 129185464 | 129186868 | 1405 | 455  | 65  | 154.31 | 8.09  | 0.1  |
| chr6 | 129187168 | 129188786 | 1619 | 898  | 81  | 177.66 | 5.91  | 0.07 |
| chr6 | 129299667 | 129302004 | 2338 | 606  | 111 | 444.02 | 11.46 | 0    |
| chr6 | 129482669 | 129483587 | 919  | 502  | 32  | 79.09  | 8.54  | 0.1  |
| chr6 | 131242622 | 131243895 | 1274 | 634  | 81  | 343.34 | 17.53 | 0    |
| chr6 | 133984547 | 133986170 | 1624 | 892  | 114 | 367.86 | 10.27 | 0    |
| chr6 | 134779502 | 134780720 | 1219 | 726  | 58  | 211.84 | 11.34 | 0    |
| chr6 | 134847707 | 134848992 | 1286 | 808  | 64  | 128.24 | 4.33  | 0.08 |
| chr6 | 134869445 | 134871126 | 1682 | 1240 | 90  | 214.26 | 5.91  | 0    |
| chr6 | 134877344 | 134878868 | 1525 | 1143 | 67  | 204.02 | 8.23  | 0    |
| chr6 | 134961059 | 134962066 | 1008 | 615  | 41  | 97.73  | 6.16  | 0.08 |
| chr6 | 135117786 | 135118361 | 576  | 391  | 32  | 97.81  | 5.73  | 0.08 |
| chr6 | 135246191 | 135247004 | 814  | 506  | 36  | 77.45  | 5.18  | 0.12 |
| chr6 | 136467074 | 136468180 | 1107 | 479  | 54  | 96.47  | 5.93  | 0.08 |
| chr6 | 136751976 | 136753271 | 1296 | 932  | 78  | 102.39 | 6.21  | 0.06 |
| chr6 | 136775741 | 136777388 | 1648 | 763  | 84  | 161.17 | 6.14  | 0.11 |

|      |           |           |      |      |     |        |       |      |
|------|-----------|-----------|------|------|-----|--------|-------|------|
| chr6 | 136889016 | 136890714 | 1699 | 773  | 68  | 117.25 | 4.91  | 0.07 |
| chr6 | 137702616 | 137703661 | 1046 | 527  | 44  | 108.5  | 9.25  | 0.06 |
| chr6 | 140571493 | 140572628 | 1136 | 476  | 47  | 119.72 | 7.69  | 0.07 |
| chr6 | 142335284 | 142336282 | 999  | 466  | 40  | 120.98 | 9.04  | 0.07 |
| chr6 | 142705851 | 142706931 | 1081 | 320  | 37  | 95.92  | 5.09  | 0.08 |
| chr6 | 143047761 | 143049120 | 1360 | 307  | 51  | 92.22  | 5.63  | 0.07 |
| chr6 | 145069857 | 145070862 | 1006 | 444  | 47  | 110.76 | 7.75  | 0.06 |
| chr6 | 145198455 | 145199256 | 802  | 379  | 27  | 83.13  | 8.2   | 0.11 |
| chr6 | 145813671 | 145815413 | 1743 | 1036 | 91  | 162.3  | 5.48  | 0.11 |
| chr6 | 146590562 | 146591579 | 1018 | 532  | 43  | 100.67 | 6.25  | 0.08 |
| chr6 | 146836364 | 146837381 | 1018 | 392  | 38  | 132.83 | 8.16  | 0.08 |
| chr6 | 146990943 | 146991950 | 1008 | 423  | 47  | 71.48  | 4.3   | 0.15 |
| chr6 | 147039471 | 147040396 | 926  | 422  | 39  | 103.97 | 7.28  | 0.06 |
| chr6 | 148160139 | 148161230 | 1092 | 633  | 47  | 78.26  | 4.05  | 0.12 |
| chr6 | 148893084 | 148893638 | 555  | 359  | 20  | 70.8   | 8.31  | 0.16 |
| chr6 | 149136631 | 149137776 | 1146 | 572  | 55  | 95.51  | 6.47  | 0.08 |
| chr6 | 149257343 | 149258741 | 1399 | 657  | 84  | 394.15 | 18.34 | 0    |
| chr7 | 3288811   | 3289786   | 976  | 528  | 39  | 121.97 | 9.81  | 0.07 |
| chr7 | 3292618   | 3293359   | 742  | 449  | 29  | 89.88  | 8.62  | 0.07 |
| chr7 | 3580923   | 3581987   | 1065 | 558  | 49  | 125.9  | 7.72  | 0.07 |
| chr7 | 3595957   | 3597422   | 1466 | 944  | 79  | 106.17 | 5.11  | 0.06 |
| chr7 | 3655178   | 3656310   | 1133 | 489  | 74  | 176.97 | 9.1   | 0.07 |
| chr7 | 3656420   | 3657709   | 1290 | 887  | 48  | 99.82  | 5.42  | 0.08 |
| chr7 | 4088029   | 4089373   | 1345 | 518  | 71  | 88.39  | 6.22  | 0.07 |
| chr7 | 4100073   | 4101793   | 1721 | 883  | 93  | 111.48 | 4.85  | 0.06 |
| chr7 | 4396554   | 4397462   | 909  | 680  | 44  | 88.78  | 6.36  | 0.07 |
| chr7 | 4452579   | 4454194   | 1616 | 726  | 86  | 225.67 | 7.08  | 0    |
| chr7 | 4609473   | 4611081   | 1609 | 1100 | 72  | 205.59 | 9.37  | 0    |
| chr7 | 4675035   | 4676647   | 1613 | 1142 | 72  | 120.27 | 6.36  | 0.07 |
| chr7 | 4690896   | 4693262   | 2367 | 1915 | 115 | 263.58 | 7.08  | 0    |
| chr7 | 4743797   | 4744963   | 1167 | 479  | 59  | 185.23 | 7.28  | 0    |
| chr7 | 4763945   | 4765038   | 1094 | 587  | 54  | 134.42 | 7.42  | 0.08 |
| chr7 | 4817205   | 4818580   | 1376 | 835  | 82  | 214.69 | 8.39  | 0    |
| chr7 | 4828229   | 4829227   | 999  | 516  | 41  | 92.99  | 7.36  | 0.07 |
| chr7 | 4866223   | 4867480   | 1258 | 775  | 72  | 218.72 | 8.79  | 0    |
| chr7 | 4965692   | 4967602   | 1911 | 1301 | 81  | 134.39 | 4.49  | 0.08 |
| chr7 | 4971431   | 4972683   | 1253 | 676  | 64  | 120.25 | 6.2   | 0.07 |
| chr7 | 4989665   | 4990610   | 946  | 271  | 38  | 74.82  | 5.06  | 0.13 |
| chr7 | 5002668   | 5003776   | 1109 | 424  | 54  | 183.39 | 9.89  | 0    |
| chr7 | 5011520   | 5014686   | 3167 | 2245 | 161 | 360.86 | 5.91  | 0    |
| chr7 | 5031361   | 5032602   | 1242 | 380  | 71  | 155.44 | 8.09  | 0.11 |
| chr7 | 6106685   | 6108155   | 1471 | 636  | 75  | 161.33 | 5.69  | 0.11 |
| chr7 | 7250857   | 7252889   | 2033 | 1503 | 111 | 253.92 | 7.48  | 0    |
| chr7 | 13063357  | 13064326  | 970  | 380  | 45  | 188.02 | 14.45 | 0    |

|      |          |          |      |      |     |        |       |      |
|------|----------|----------|------|------|-----|--------|-------|------|
| chr7 | 13419627 | 13420821 | 1195 | 776  | 46  | 72.17  | 5.29  | 0.15 |
| chr7 | 13466084 | 13467108 | 1025 | 455  | 44  | 87.9   | 5.83  | 0.07 |
| chr7 | 13495294 | 13496354 | 1061 | 572  | 53  | 214.33 | 10.51 | 0    |
| chr7 | 13506747 | 13507878 | 1132 | 737  | 73  | 230.35 | 8.74  | 0    |
| chr7 | 13550655 | 13551624 | 970  | 478  | 47  | 110.12 | 6.8   | 0.06 |
| chr7 | 13609266 | 13610762 | 1497 | 515  | 62  | 107.69 | 4.85  | 0.06 |
| chr7 | 13619391 | 13620698 | 1308 | 748  | 80  | 103.31 | 6.44  | 0.06 |
| chr7 | 13622771 | 13624338 | 1568 | 921  | 81  | 228.5  | 7.72  | 0    |
| chr7 | 16507225 | 16508418 | 1194 | 452  | 62  | 114.02 | 6.26  | 0.06 |
| chr7 | 16530758 | 16531793 | 1036 | 626  | 38  | 79.59  | 5.78  | 0.1  |
| chr7 | 16631530 | 16635038 | 3509 | 2312 | 188 | 243.9  | 6.12  | 0    |
| chr7 | 16637171 | 16638831 | 1661 | 1098 | 77  | 152.14 | 6.53  | 0.1  |
| chr7 | 16704737 | 16705697 | 961  | 581  | 41  | 92.28  | 7.39  | 0.07 |
| chr7 | 16839269 | 16840503 | 1235 | 349  | 63  | 131.05 | 6.36  | 0.08 |
| chr7 | 16842924 | 16845146 | 2223 | 433  | 140 | 380.03 | 8.09  | 0    |
| chr7 | 16858169 | 16859665 | 1497 | 431  | 70  | 85.07  | 4.85  | 0.07 |
| chr7 | 16870779 | 16872595 | 1817 | 981  | 107 | 206    | 6.86  | 0    |
| chr7 | 16894288 | 16895947 | 1660 | 419  | 81  | 93.98  | 3.72  | 0.07 |
| chr7 | 16897379 | 16899905 | 2527 | 2010 | 142 | 355.33 | 8.49  | 0    |
| chr7 | 16972644 | 16973659 | 1016 | 612  | 41  | 85.41  | 7.04  | 0.07 |
| chr7 | 16984094 | 16988067 | 3974 | 2286 | 298 | 998.89 | 10.82 | 0    |
| chr7 | 17199758 | 17201044 | 1287 | 701  | 60  | 103.82 | 5.3   | 0.06 |
| chr7 | 17508826 | 17510347 | 1522 | 619  | 81  | 193.01 | 6.85  | 0    |
| chr7 | 17612066 | 17613445 | 1380 | 972  | 53  | 70.78  | 3.76  | 0.16 |
| chr7 | 19495476 | 19496434 | 959  | 519  | 40  | 73.22  | 4.98  | 0.13 |
| chr7 | 19704390 | 19705696 | 1307 | 839  | 62  | 124.66 | 6.53  | 0.07 |
| chr7 | 19734114 | 19735726 | 1613 | 1092 | 66  | 116.19 | 7.44  | 0.07 |
| chr7 | 19812645 | 19814542 | 1898 | 767  | 138 | 258.8  | 6.51  | 0    |
| chr7 | 19856660 | 19857863 | 1204 | 520  | 56  | 173.55 | 7.79  | 0.07 |
| chr7 | 19893528 | 19894407 | 880  | 466  | 37  | 73.7   | 5.83  | 0.13 |
| chr7 | 20146921 | 20148488 | 1568 | 949  | 80  | 211.13 | 6.68  | 0    |
| chr7 | 20158270 | 20159156 | 887  | 532  | 37  | 92.45  | 7.32  | 0.07 |
| chr7 | 20189159 | 20190206 | 1048 | 608  | 51  | 132.34 | 8.09  | 0.08 |
| chr7 | 20213413 | 20215412 | 2000 | 871  | 104 | 276.02 | 6.68  | 0    |
| chr7 | 20249642 | 20251373 | 1732 | 1104 | 90  | 195.78 | 5.69  | 0    |
| chr7 | 20279253 | 20284981 | 5729 | 1618 | 318 | 988.62 | 8.57  | 0    |
| chr7 | 20300490 | 20301667 | 1178 | 518  | 57  | 89.71  | 4.8   | 0.07 |
| chr7 | 20407389 | 20408504 | 1116 | 484  | 45  | 97.72  | 5.49  | 0.08 |
| chr7 | 20408897 | 20409985 | 1089 | 748  | 41  | 92.86  | 5.21  | 0.07 |
| chr7 | 25101335 | 25102416 | 1082 | 513  | 47  | 106.38 | 7.04  | 0.06 |
| chr7 | 25314964 | 25316007 | 1044 | 622  | 56  | 82.09  | 6.78  | 0.1  |
| chr7 | 25331541 | 25332611 | 1071 | 547  | 48  | 75.94  | 5.39  | 0.14 |
| chr7 | 25668661 | 25670059 | 1399 | 720  | 97  | 276.15 | 7.53  | 0    |
| chr7 | 25687545 | 25688680 | 1136 | 667  | 47  | 150.41 | 9.37  | 0.1  |

|      |          |          |      |      |     |         |       |      |
|------|----------|----------|------|------|-----|---------|-------|------|
| chr7 | 25688751 | 25689872 | 1122 | 558  | 45  | 97.61   | 6.25  | 0.08 |
| chr7 | 25756770 | 25758223 | 1454 | 936  | 67  | 84.31   | 5.71  | 0.06 |
| chr7 | 25860974 | 25862861 | 1888 | 1379 | 109 | 325.77  | 10.55 | 0    |
| chr7 | 26022364 | 26023902 | 1539 | 1020 | 70  | 75.73   | 4.49  | 0.13 |
| chr7 | 26033631 | 26034687 | 1057 | 390  | 40  | 121.54  | 7.08  | 0.07 |
| chr7 | 26034725 | 26036211 | 1487 | 1010 | 65  | 219.65  | 11.63 | 0    |
| chr7 | 26052218 | 26053843 | 1626 | 1009 | 90  | 159.63  | 4.17  | 0.11 |
| chr7 | 26063133 | 26065992 | 2860 | 1046 | 148 | 348.39  | 7.5   | 0    |
| chr7 | 26066491 | 26069370 | 2880 | 454  | 130 | 185.91  | 5.39  | 0    |
| chr7 | 26082149 | 26083360 | 1212 | 555  | 57  | 76.44   | 4.05  | 0.12 |
| chr7 | 26101255 | 26102544 | 1290 | 587  | 56  | 92.16   | 4.91  | 0.07 |
| chr7 | 26179697 | 26181406 | 1710 | 625  | 84  | 235.32  | 6.55  | 0    |
| chr7 | 26435907 | 26436902 | 996  | 503  | 39  | 89.04   | 7.71  | 0.07 |
| chr7 | 26443294 | 26444495 | 1202 | 518  | 67  | 135.87  | 6.52  | 0.08 |
| chr7 | 26464812 | 26466579 | 1768 | 1067 | 85  | 196.12  | 8.43  | 0    |
| chr7 | 26471411 | 26474857 | 3447 | 686  | 165 | 415.96  | 6.65  | 0    |
| chr7 | 26538685 | 26540560 | 1876 | 798  | 98  | 249.15  | 5.73  | 0    |
| chr7 | 26540677 | 26541764 | 1088 | 565  | 49  | 73.62   | 6     | 0.13 |
| chr7 | 26561524 | 26562251 | 728  | 353  | 30  | 99.74   | 7.8   | 0.08 |
| chr7 | 27950996 | 27952831 | 1836 | 405  | 89  | 206.89  | 7.42  | 0    |
| chr7 | 28012987 | 28013854 | 868  | 344  | 36  | 95.26   | 5.66  | 0.07 |
| chr7 | 28043142 | 28044123 | 982  | 490  | 39  | 93.66   | 7.89  | 0.07 |
| chr7 | 28140455 | 28142796 | 2342 | 514  | 113 | 337.25  | 9.68  | 0    |
| chr7 | 28232345 | 28234771 | 2427 | 840  | 109 | 111.22  | 4.27  | 0.06 |
| chr7 | 28257722 | 28259149 | 1428 | 1085 | 65  | 101.11  | 4.58  | 0.08 |
| chr7 | 28259215 | 28260152 | 938  | 523  | 38  | 91.1    | 7.71  | 0.07 |
| chr7 | 28271394 | 28272968 | 1575 | 606  | 94  | 213.27  | 10.79 | 0    |
| chr7 | 28275238 | 28276602 | 1365 | 941  | 58  | 140.33  | 7.32  | 0.09 |
| chr7 | 28375973 | 28377384 | 1412 | 998  | 67  | 163.89  | 6.33  | 0.06 |
| chr7 | 28458879 | 28460074 | 1196 | 405  | 44  | 103.84  | 4.68  | 0.06 |
| chr7 | 28623224 | 28623817 | 594  | 370  | 23  | 89.3    | 8.74  | 0.07 |
| chr7 | 28954245 | 28955770 | 1526 | 448  | 69  | 152.68  | 7.55  | 0.1  |
| chr7 | 29096681 | 29097525 | 845  | 338  | 44  | 89.3    | 5.66  | 0.07 |
| chr7 | 29123103 | 29124465 | 1363 | 639  | 67  | 111.85  | 6     | 0.06 |
| chr7 | 29135170 | 29136244 | 1075 | 451  | 49  | 94.73   | 6.85  | 0.07 |
| chr7 | 29156936 | 29158675 | 1740 | 1084 | 96  | 225.39  | 7.79  | 0    |
| chr7 | 29159970 | 29164949 | 4980 | 4258 | 424 | 1253.34 | 13.73 | 0    |
| chr7 | 29165193 | 29169066 | 3874 | 1945 | 221 | 477.26  | 6.14  | 0    |
| chr7 | 29170573 | 29171839 | 1267 | 486  | 58  | 92.49   | 5.12  | 0.07 |
| chr7 | 29177341 | 29178433 | 1093 | 541  | 52  | 173.03  | 10.34 | 0.07 |
| chr7 | 29526615 | 29527521 | 907  | 193  | 41  | 94.19   | 4.72  | 0.07 |
| chr7 | 29593327 | 29595102 | 1776 | 853  | 87  | 71.4    | 3.57  | 0.15 |
| chr7 | 29595208 | 29597180 | 1973 | 1272 | 136 | 427.07  | 11.2  | 0    |
| chr7 | 29940361 | 29941497 | 1137 | 403  | 60  | 224.74  | 10.17 | 0    |

|      |          |          |      |      |     |        |       |      |
|------|----------|----------|------|------|-----|--------|-------|------|
| chr7 | 29964929 | 29966017 | 1089 | 688  | 47  | 79.1   | 4.79  | 0.1  |
| chr7 | 30022621 | 30023907 | 1287 | 754  | 62  | 173.85 | 7.71  | 0.07 |
| chr7 | 30553042 | 30554078 | 1037 | 449  | 46  | 107.37 | 6.33  | 0.06 |
| chr7 | 30768346 | 30769503 | 1158 | 548  | 64  | 128.81 | 7.83  | 0.08 |
| chr7 | 31016320 | 31017287 | 968  | 461  | 39  | 86.9   | 6.99  | 0.07 |
| chr7 | 31064403 | 31066476 | 2074 | 1503 | 103 | 175.33 | 5.56  | 0.07 |
| chr7 | 31197514 | 31199861 | 2348 | 445  | 109 | 166.23 | 4.85  | 0.06 |
| chr7 | 31202053 | 31203552 | 1500 | 417  | 58  | 99.11  | 4.42  | 0.08 |
| chr7 | 31203921 | 31205629 | 1709 | 1056 | 89  | 71.62  | 3.69  | 0.15 |
| chr7 | 31206280 | 31208950 | 2671 | 2138 | 119 | 142.34 | 4.41  | 0.09 |
| chr7 | 31336944 | 31337987 | 1044 | 290  | 44  | 96.48  | 5.63  | 0.08 |
| chr7 | 31344376 | 31345045 | 670  | 325  | 27  | 98.7   | 9.17  | 0.08 |
| chr7 | 31347795 | 31348807 | 1013 | 501  | 39  | 76.47  | 5.98  | 0.12 |
| chr7 | 31373565 | 31374777 | 1213 | 381  | 49  | 106.14 | 5.88  | 0.06 |
| chr7 | 31434955 | 31435902 | 948  | 294  | 66  | 160.12 | 7.38  | 0.11 |
| chr7 | 31449598 | 31450472 | 875  | 405  | 51  | 206.56 | 16.63 | 0    |
| chr7 | 31740548 | 31743435 | 2888 | 2148 | 130 | 284.22 | 8.48  | 0    |
| chr7 | 31758570 | 31759399 | 830  | 369  | 30  | 73.39  | 5.54  | 0.13 |
| chr7 | 31816278 | 31818360 | 2083 | 953  | 80  | 119.7  | 4.05  | 0.07 |
| chr7 | 31935500 | 31936858 | 1359 | 974  | 66  | 141.54 | 5.29  | 0.09 |
| chr7 | 35173585 | 35175409 | 1825 | 1279 | 98  | 200.54 | 7.81  | 0    |
| chr7 | 35840425 | 35842392 | 1968 | 1120 | 88  | 162.66 | 5.6   | 0.12 |
| chr7 | 35902987 | 35906139 | 3153 | 1358 | 182 | 379.75 | 9.44  | 0    |
| chr7 | 36181365 | 36182526 | 1162 | 421  | 47  | 116.36 | 6.88  | 0.07 |
| chr7 | 36340037 | 36341440 | 1404 | 470  | 67  | 174.52 | 6.62  | 0.07 |
| chr7 | 38803744 | 38804992 | 1249 | 514  | 51  | 134.89 | 5.96  | 0.08 |
| chr7 | 38968269 | 38969187 | 919  | 403  | 34  | 72.95  | 6.52  | 0.15 |
| chr7 | 39055843 | 39056905 | 1063 | 575  | 58  | 207.82 | 14.9  | 0    |
| chr7 | 46772765 | 46773690 | 926  | 424  | 36  | 87.87  | 5.26  | 0.07 |
| chr7 | 46799484 | 46800400 | 917  | 326  | 37  | 88.59  | 5.78  | 0.07 |
| chr7 | 50698754 | 50699888 | 1135 | 660  | 49  | 76.81  | 5.3   | 0.12 |
| chr7 | 51501264 | 51502745 | 1482 | 922  | 85  | 167.75 | 6.07  | 0.06 |
| chr7 | 51628801 | 51630210 | 1410 | 519  | 59  | 188.16 | 8.93  | 0    |
| chr7 | 51751127 | 51752457 | 1331 | 831  | 78  | 191.84 | 10.11 | 0    |
| chr7 | 51803692 | 51804719 | 1028 | 606  | 39  | 91.1   | 6.88  | 0.07 |
| chr7 | 51808619 | 51809741 | 1123 | 784  | 54  | 104.91 | 5.49  | 0.06 |
| chr7 | 52071289 | 52072393 | 1105 | 539  | 48  | 102.18 | 5.06  | 0.05 |
| chr7 | 52103618 | 52106202 | 2585 | 1552 | 182 | 295.59 | 5.46  | 0    |
| chr7 | 52109300 | 52110797 | 1498 | 737  | 94  | 227.84 | 6.74  | 0    |
| chr7 | 52124284 | 52125953 | 1670 | 875  | 85  | 218.55 | 8.66  | 0    |
| chr7 | 52150393 | 52151795 | 1403 | 263  | 51  | 76.6   | 4.41  | 0.12 |
| chr7 | 52184389 | 52186330 | 1942 | 570  | 107 | 225.75 | 6.7   | 0    |
| chr7 | 52241231 | 52242707 | 1477 | 487  | 76  | 121.6  | 4.9   | 0.07 |
| chr7 | 52252130 | 52254272 | 2143 | 858  | 92  | 182.81 | 6.8   | 0    |

|      |          |          |      |      |     |        |       |      |
|------|----------|----------|------|------|-----|--------|-------|------|
| chr7 | 52270879 | 52272112 | 1234 | 725  | 63  | 152.98 | 7.12  | 0.1  |
| chr7 | 52272251 | 52273821 | 1571 | 790  | 79  | 194.38 | 6.07  | 0    |
| chr7 | 52308340 | 52310241 | 1902 | 1346 | 81  | 158.16 | 6.07  | 0.11 |
| chr7 | 52333786 | 52334505 | 720  | 447  | 28  | 71.3   | 6.07  | 0.15 |
| chr7 | 52379244 | 52380526 | 1283 | 479  | 58  | 95.86  | 5.86  | 0.08 |
| chr7 | 52383587 | 52385033 | 1447 | 558  | 82  | 167.09 | 6.79  | 0.06 |
| chr7 | 52408992 | 52410330 | 1339 | 589  | 86  | 291.68 | 12.66 | 0    |
| chr7 | 52493136 | 52494426 | 1291 | 781  | 52  | 86.37  | 4.36  | 0.07 |
| chr7 | 52594448 | 52595485 | 1038 | 623  | 39  | 84.15  | 5.78  | 0.06 |
| chr7 | 52622087 | 52623109 | 1023 | 439  | 46  | 87.23  | 5.69  | 0.07 |
| chr7 | 52650493 | 52651664 | 1172 | 553  | 57  | 81.34  | 5     | 0.1  |
| chr7 | 52689209 | 52690505 | 1297 | 987  | 57  | 77.02  | 4.46  | 0.12 |
| chr7 | 52711026 | 52716960 | 5935 | 1835 | 575 | 2004.4 | 16.69 | 0    |
| chr7 | 52721439 | 52722650 | 1212 | 723  | 60  | 102.71 | 5.74  | 0.06 |
| chr7 | 52776848 | 52777779 | 932  | 409  | 34  | 77.02  | 6.47  | 0.12 |
| chr7 | 52781010 | 52782166 | 1157 | 568  | 58  | 101.75 | 6.26  | 0.05 |
| chr7 | 52844250 | 52845267 | 1018 | 442  | 43  | 74.75  | 4.49  | 0.13 |
| chr7 | 52959697 | 52961115 | 1419 | 540  | 66  | 118.95 | 6.07  | 0.07 |
| chr7 | 52961328 | 52965591 | 4264 | 1902 | 219 | 422.76 | 6.07  | 0    |
| chr7 | 52969892 | 52974720 | 4829 | 3458 | 315 | 399.33 | 6.83  | 0    |
| chr7 | 53069114 | 53070336 | 1223 | 530  | 53  | 82.61  | 4.46  | 0.11 |
| chr7 | 53127863 | 53129206 | 1344 | 532  | 59  | 88.58  | 3.91  | 0.07 |
| chr7 | 53151664 | 53153050 | 1387 | 892  | 62  | 94.03  | 5.39  | 0.07 |
| chr7 | 53175438 | 53177324 | 1887 | 1418 | 85  | 150.27 | 5.69  | 0.1  |
| chr7 | 53178043 | 53179508 | 1466 | 948  | 57  | 106.37 | 5.75  | 0.06 |
| chr7 | 53288678 | 53289508 | 831  | 445  | 33  | 74.08  | 6.99  | 0.13 |
| chr7 | 54100738 | 54101970 | 1233 | 531  | 78  | 157.04 | 8.78  | 0.11 |
| chr7 | 54174907 | 54175941 | 1035 | 507  | 67  | 180.69 | 10.88 | 0    |
| chr7 | 54263021 | 54264315 | 1295 | 630  | 70  | 128.66 | 7.33  | 0.08 |
| chr7 | 54305467 | 54307860 | 2394 | 614  | 118 | 177.35 | 5.56  | 0.07 |
| chr7 | 56043994 | 56044984 | 991  | 479  | 39  | 89.65  | 6.55  | 0.07 |
| chr7 | 56301895 | 56303391 | 1497 | 365  | 56  | 99.6   | 5.63  | 0.08 |
| chr7 | 56500768 | 56502149 | 1382 | 726  | 64  | 148.84 | 6.74  | 0.1  |
| chr7 | 63048901 | 63049986 | 1086 | 541  | 47  | 94.13  | 6.8   | 0.07 |
| chr7 | 63097222 | 63098402 | 1181 | 421  | 62  | 212.69 | 9.79  | 0    |
| chr7 | 63216798 | 63218304 | 1507 | 1050 | 67  | 118.89 | 6.89  | 0.07 |
| chr7 | 63304986 | 63305928 | 943  | 591  | 49  | 88.55  | 5.31  | 0.07 |
| chr7 | 65654178 | 65655131 | 954  | 500  | 41  | 93.19  | 8.09  | 0.07 |
| chr7 | 71003322 | 71004183 | 862  | 241  | 37  | 121.74 | 8.09  | 0.07 |
| chr7 | 71055431 | 71057536 | 2106 | 961  | 97  | 165.66 | 6.93  | 0.06 |
| chr7 | 71082325 | 71085104 | 2780 | 1706 | 151 | 321.54 | 6.36  | 0    |
| chr7 | 71431857 | 71433176 | 1320 | 596  | 78  | 185.32 | 8.09  | 0    |
| chr7 | 71536690 | 71538037 | 1348 | 505  | 64  | 157.34 | 6.68  | 0.11 |
| chr7 | 72017443 | 72018429 | 987  | 494  | 36  | 75.48  | 8.48  | 0.13 |

|      |           |           |      |      |     |        |       |      |
|------|-----------|-----------|------|------|-----|--------|-------|------|
| chr7 | 73532679  | 73533728  | 1050 | 541  | 53  | 159.01 | 11.56 | 0.11 |
| chr7 | 74367095  | 74367892  | 798  | 368  | 26  | 70.48  | 7.54  | 0.16 |
| chr7 | 74516812  | 74518924  | 2113 | 1214 | 114 | 163.57 | 4.94  | 0.06 |
| chr7 | 74789436  | 74790937  | 1502 | 938  | 77  | 166.5  | 8.39  | 0.06 |
| chr7 | 75096443  | 75097534  | 1092 | 338  | 37  | 92.85  | 6.66  | 0.07 |
| chr7 | 80677677  | 80679114  | 1438 | 1051 | 63  | 145.83 | 5.09  | 0.09 |
| chr7 | 80681882  | 80687098  | 5217 | 952  | 300 | 417.95 | 7.24  | 0    |
| chr7 | 80695196  | 80695831  | 636  | 371  | 21  | 70.89  | 6.99  | 0.16 |
| chr7 | 80701753  | 80705112  | 3360 | 1541 | 220 | 670.59 | 10.03 | 0    |
| chr7 | 80739783  | 80740758  | 976  | 465  | 37  | 92.97  | 6.39  | 0.07 |
| chr7 | 80751503  | 80753115  | 1613 | 464  | 68  | 133.04 | 5.06  | 0.08 |
| chr7 | 80761871  | 80764575  | 2705 | 1310 | 202 | 837.8  | 17.28 | 0    |
| chr7 | 82926781  | 82927493  | 713  | 197  | 24  | 79.99  | 7.51  | 0.1  |
| chr7 | 86536504  | 86537681  | 1178 | 400  | 52  | 83.88  | 4.74  | 0.06 |
| chr7 | 86610367  | 86611876  | 1510 | 943  | 102 | 292.55 | 9.54  | 0    |
| chr7 | 86992645  | 86993479  | 835  | 566  | 43  | 126.12 | 7.62  | 0.07 |
| chr7 | 87065128  | 87066078  | 951  | 524  | 40  | 88.62  | 6.68  | 0.07 |
| chr7 | 87169481  | 87173195  | 3715 | 658  | 193 | 385.8  | 7.22  | 0    |
| chr7 | 87173679  | 87175047  | 1369 | 400  | 52  | 73.03  | 3.6   | 0.13 |
| chr7 | 87259333  | 87260739  | 1407 | 907  | 57  | 107.16 | 4.72  | 0.06 |
| chr7 | 87377222  | 87378231  | 1010 | 567  | 40  | 104.96 | 5.96  | 0.06 |
| chr7 | 87468414  | 87469677  | 1264 | 677  | 65  | 195.52 | 7.71  | 0    |
| chr7 | 87484705  | 87485726  | 1022 | 472  | 50  | 77.57  | 4.9   | 0.12 |
| chr7 | 87530847  | 87533924  | 3078 | 1921 | 208 | 724.49 | 10.32 | 0    |
| chr7 | 87919347  | 87920513  | 1167 | 698  | 58  | 160.72 | 5.88  | 0.11 |
| chr7 | 87946943  | 87948891  | 1949 | 1293 | 114 | 248.37 | 6.74  | 0    |
| chr7 | 88045734  | 88046815  | 1082 | 514  | 46  | 90.01  | 6.15  | 0.07 |
| chr7 | 88357364  | 88358667  | 1304 | 693  | 64  | 155.46 | 6.74  | 0.11 |
| chr7 | 88489693  | 88490785  | 1093 | 625  | 53  | 116.18 | 7.47  | 0.07 |
| chr7 | 88907239  | 88908359  | 1121 | 702  | 45  | 110.93 | 6.88  | 0.06 |
| chr7 | 88974163  | 88974948  | 786  | 400  | 29  | 75.94  | 8.37  | 0.14 |
| chr7 | 91031718  | 91033556  | 1839 | 743  | 109 | 278.25 | 7.79  | 0    |
| chr7 | 97088825  | 97090031  | 1207 | 661  | 57  | 126.1  | 6.47  | 0.07 |
| chr7 | 97128478  | 97129895  | 1418 | 530  | 82  | 263.7  | 9.99  | 0    |
| chr7 | 97277489  | 97279778  | 2290 | 1338 | 118 | 377.46 | 8.84  | 0    |
| chr7 | 97280036  | 97282025  | 1990 | 633  | 84  | 248.58 | 6.59  | 0    |
| chr7 | 97361372  | 97362072  | 701  | 228  | 25  | 70.65  | 6.14  | 0.16 |
| chr7 | 97605111  | 97606587  | 1477 | 613  | 83  | 221.98 | 7.12  | 0    |
| chr7 | 99817070  | 99819108  | 2039 | 1372 | 102 | 208.29 | 7.79  | 0    |
| chr7 | 99889425  | 99890578  | 1154 | 544  | 57  | 108.64 | 6.14  | 0.06 |
| chr7 | 100022453 | 100024273 | 1821 | 1331 | 92  | 125.67 | 5.32  | 0.07 |
| chr7 | 104229649 | 104232034 | 2386 | 1701 | 130 | 294.61 | 6.29  | 0    |
| chr7 | 104359104 | 104360074 | 971  | 710  | 39  | 71.87  | 4.53  | 0.15 |
| chr7 | 104480180 | 104481505 | 1326 | 419  | 64  | 104.22 | 4.18  | 0.06 |

|      |           |           |      |      |     |         |       |      |
|------|-----------|-----------|------|------|-----|---------|-------|------|
| chr7 | 104519629 | 104520796 | 1168 | 579  | 64  | 100.3   | 6.29  | 0.08 |
| chr7 | 104727538 | 104728994 | 1457 | 406  | 52  | 77.22   | 4.98  | 0.12 |
| chr7 | 105326253 | 105327426 | 1174 | 419  | 39  | 86.25   | 5.54  | 0.07 |
| chr7 | 105457449 | 105458388 | 940  | 552  | 50  | 98      | 5.74  | 0.08 |
| chr7 | 105963286 | 105964957 | 1672 | 630  | 95  | 255.14  | 10.36 | 0    |
| chr7 | 106529486 | 106530565 | 1080 | 479  | 56  | 114.91  | 5.86  | 0.06 |
| chr7 | 106616626 | 106617735 | 1110 | 399  | 46  | 81.49   | 5.29  | 0.1  |
| chr7 | 106631458 | 106632675 | 1218 | 689  | 74  | 147.24  | 6.9   | 0.1  |
| chr7 | 106683025 | 106685107 | 2083 | 1284 | 120 | 192.45  | 4.49  | 0    |
| chr7 | 107128083 | 107129273 | 1191 | 809  | 59  | 185.2   | 11.56 | 0    |
| chr7 | 107269277 | 107270656 | 1380 | 890  | 65  | 133.68  | 6.22  | 0.08 |
| chr7 | 107307342 | 107308513 | 1172 | 458  | 52  | 112.87  | 6.07  | 0.06 |
| chr7 | 107641021 | 107642693 | 1673 | 858  | 117 | 307.65  | 9.13  | 0    |
| chr7 | 107642804 | 107645368 | 2565 | 1854 | 115 | 86.86   | 3.44  | 0.07 |
| chr7 | 107648557 | 107654295 | 5739 | 1769 | 418 | 1067.28 | 7.53  | 0    |
| chr7 | 107685213 | 107686171 | 959  | 441  | 39  | 106.02  | 8.94  | 0.06 |
| chr7 | 107731015 | 107731908 | 894  | 447  | 32  | 87.78   | 6.19  | 0.07 |
| chr7 | 107755416 | 107756830 | 1415 | 828  | 75  | 84.34   | 4.93  | 0.06 |
| chr7 | 107854452 | 107855830 | 1379 | 869  | 60  | 92.51   | 6.14  | 0.07 |
| chr7 | 108082782 | 108085481 | 2700 | 536  | 106 | 136.48  | 4.74  | 0.08 |
| chr7 | 108108410 | 108110461 | 2052 | 1489 | 93  | 146.34  | 6.14  | 0.09 |
| chr7 | 108111067 | 108113520 | 2454 | 1871 | 123 | 108.25  | 4.82  | 0.06 |
| chr7 | 108256404 | 108257701 | 1298 | 349  | 57  | 92.59   | 4.83  | 0.07 |
| chr7 | 108527795 | 108528979 | 1185 | 682  | 46  | 76.13   | 3.82  | 0.12 |
| chr7 | 108530251 | 108531823 | 1573 | 977  | 83  | 91.17   | 3.95  | 0.07 |
| chr7 | 108984656 | 108987321 | 2666 | 1784 | 122 | 239.93  | 6.12  | 0    |
| chr7 | 109044335 | 109045813 | 1479 | 911  | 95  | 217.98  | 7.08  | 0    |
| chr7 | 109053673 | 109056063 | 2391 | 958  | 142 | 206.23  | 6.43  | 0    |
| chr7 | 109056412 | 109057404 | 993  | 522  | 43  | 82.39   | 5.6   | 0.11 |
| chr7 | 109082093 | 109083073 | 981  | 403  | 40  | 75.11   | 5.83  | 0.13 |
| chr7 | 109117916 | 109119166 | 1251 | 706  | 57  | 150.77  | 6.55  | 0.1  |
| chr7 | 109395069 | 109399833 | 4765 | 3743 | 247 | 461.84  | 6.7   | 0    |
| chr7 | 109414869 | 109415761 | 893  | 318  | 40  | 96.36   | 6.68  | 0.08 |
| chr7 | 109589690 | 109590943 | 1254 | 599  | 80  | 227.51  | 11.99 | 0    |
| chr7 | 112702725 | 112703488 | 764  | 325  | 25  | 74.47   | 7.01  | 0.13 |
| chr7 | 112781571 | 112782405 | 835  | 277  | 33  | 95.83   | 6.82  | 0.08 |
| chr7 | 112788346 | 112789897 | 1552 | 764  | 65  | 92.64   | 4.18  | 0.07 |
| chr7 | 116661974 | 116663269 | 1296 | 571  | 58  | 88.96   | 4.32  | 0.07 |
| chr7 | 116895294 | 116896597 | 1304 | 612  | 59  | 173.44  | 7.24  | 0.07 |
| chr7 | 117103091 | 117104517 | 1427 | 984  | 51  | 105.78  | 7.28  | 0.06 |
| chr7 | 117129550 | 117130447 | 898  | 408  | 43  | 146.75  | 11.69 | 0.09 |
| chr7 | 117161406 | 117162377 | 972  | 470  | 47  | 115.8   | 9.78  | 0.07 |
| chr7 | 117204148 | 117206259 | 2112 | 790  | 123 | 241.59  | 5.56  | 0    |
| chr7 | 117264609 | 117265927 | 1319 | 646  | 69  | 154.95  | 7.49  | 0.1  |

|      |           |           |      |      |     |        |       |      |
|------|-----------|-----------|------|------|-----|--------|-------|------|
| chr7 | 117522587 | 117523415 | 829  | 326  | 29  | 84.42  | 7.59  | 0.06 |
| chr7 | 117758141 | 117759166 | 1026 | 579  | 42  | 137.16 | 8.54  | 0.08 |
| chr7 | 117911610 | 117912779 | 1170 | 477  | 47  | 122.98 | 7.24  | 0.07 |
| chr7 | 118225052 | 118227303 | 2252 | 1438 | 143 | 187.73 | 5.33  | 0    |
| chr7 | 118265362 | 118266916 | 1555 | 783  | 78  | 107.09 | 4.85  | 0.06 |
| chr7 | 119166356 | 119167385 | 1030 | 548  | 48  | 201.61 | 12.23 | 0    |
| chr7 | 120656465 | 120657996 | 1532 | 615  | 69  | 104.59 | 5.12  | 0.06 |
| chr7 | 121397575 | 121398649 | 1075 | 615  | 45  | 86.32  | 5.83  | 0.07 |
| chr7 | 121419128 | 121420345 | 1218 | 544  | 57  | 139.15 | 6.68  | 0.09 |
| chr7 | 123236000 | 123237271 | 1272 | 750  | 52  | 94.21  | 4.53  | 0.07 |
| chr7 | 123477036 | 123478580 | 1545 | 532  | 66  | 140.41 | 6.68  | 0.09 |
| chr7 | 123586146 | 123587606 | 1461 | 947  | 71  | 249.53 | 9.04  | 0    |
| chr7 | 125259061 | 125260288 | 1228 | 397  | 50  | 96.36  | 6.41  | 0.08 |
| chr7 | 125272512 | 125273822 | 1311 | 724  | 65  | 110.45 | 4.96  | 0.06 |
| chr7 | 125386368 | 125387912 | 1545 | 1056 | 79  | 131.15 | 4.8   | 0.08 |
| chr7 | 125634306 | 125635868 | 1563 | 547  | 76  | 230.49 | 7.47  | 0    |
| chr7 | 125676090 | 125677417 | 1328 | 676  | 61  | 91.82  | 4.7   | 0.07 |
| chr7 | 125846307 | 125847208 | 902  | 427  | 31  | 73.11  | 7.87  | 0.13 |
| chr7 | 125848741 | 125849786 | 1046 | 536  | 39  | 101.9  | 7.19  | 0.05 |
| chr7 | 125883524 | 125885094 | 1571 | 1139 | 73  | 122.78 | 4.74  | 0.07 |
| chr7 | 125998640 | 125999709 | 1070 | 529  | 46  | 76.72  | 6.93  | 0.12 |
| chr7 | 126936820 | 126938110 | 1291 | 527  | 59  | 165.43 | 6.07  | 0.06 |
| chr7 | 127038902 | 127040114 | 1213 | 827  | 56  | 72.69  | 4.52  | 0.15 |
| chr7 | 127778201 | 127779153 | 953  | 492  | 36  | 103.36 | 9.52  | 0.06 |
| chr7 | 127820449 | 127821165 | 717  | 532  | 28  | 104.13 | 9.12  | 0.06 |
| chr7 | 127978409 | 127979857 | 1449 | 624  | 104 | 229.86 | 9.89  | 0    |
| chr7 | 127985896 | 127986867 | 972  | 467  | 36  | 77.12  | 6.16  | 0.12 |
| chr7 | 128060624 | 128062393 | 1770 | 629  | 76  | 133.51 | 5.48  | 0.08 |
| chr7 | 128177273 | 128178885 | 1613 | 719  | 72  | 135.28 | 6.53  | 0.08 |
| chr7 | 128217548 | 128219375 | 1828 | 551  | 81  | 131.98 | 6.65  | 0.08 |
| chr7 | 129164215 | 129165060 | 846  | 419  | 37  | 92.54  | 8.09  | 0.07 |
| chr7 | 129210048 | 129211317 | 1270 | 883  | 49  | 128.8  | 7.15  | 0.08 |
| chr7 | 129275791 | 129277159 | 1369 | 556  | 57  | 92.74  | 4.79  | 0.07 |
| chr7 | 130112939 | 130114187 | 1249 | 563  | 80  | 210.01 | 9.76  | 0    |
| chr7 | 130267051 | 130268202 | 1152 | 538  | 55  | 163.18 | 9.3   | 0.06 |
| chr7 | 132587628 | 132589210 | 1583 | 990  | 78  | 92.79  | 4.37  | 0.07 |
| chr7 | 132634430 | 132635525 | 1096 | 522  | 49  | 144.69 | 9.37  | 0.09 |
| chr7 | 132695274 | 132696354 | 1081 | 534  | 50  | 110.39 | 9.79  | 0.06 |
| chr7 | 132850792 | 132852074 | 1283 | 483  | 65  | 227.27 | 9.03  | 0    |
| chr7 | 133343307 | 133344428 | 1122 | 688  | 48  | 94.23  | 5.83  | 0.07 |
| chr7 | 133571813 | 133572964 | 1152 | 628  | 53  | 216.83 | 12.14 | 0    |
| chr7 | 133618153 | 133619058 | 906  | 413  | 31  | 72.69  | 7.43  | 0.15 |
| chr7 | 133625544 | 133626396 | 853  | 509  | 27  | 77.43  | 8.16  | 0.12 |
| chr7 | 133630078 | 133631204 | 1127 | 552  | 46  | 165.06 | 9.32  | 0.06 |

|      |           |           |      |      |     |        |       |      |
|------|-----------|-----------|------|------|-----|--------|-------|------|
| chr7 | 133645393 | 133647557 | 2165 | 475  | 122 | 427.02 | 9.73  | 0    |
| chr7 | 133726542 | 133729596 | 3055 | 1126 | 146 | 269.51 | 6.25  | 0    |
| chr7 | 133838722 | 133839868 | 1147 | 696  | 50  | 126.99 | 7.32  | 0.07 |
| chr7 | 133844380 | 133848794 | 4415 | 3926 | 222 | 402.58 | 5.67  | 0    |
| chr7 | 133889266 | 133890908 | 1643 | 718  | 101 | 153.2  | 5.26  | 0.1  |
| chr7 | 133902571 | 133903714 | 1144 | 317  | 52  | 145.79 | 7.65  | 0.09 |
| chr7 | 133919822 | 133921551 | 1730 | 729  | 83  | 181    | 6.8   | 0    |
| chr7 | 133935228 | 133936377 | 1150 | 748  | 53  | 108.13 | 6.22  | 0.06 |
| chr7 | 133941099 | 133943873 | 2775 | 1479 | 173 | 368.23 | 7.59  | 0    |
| chr7 | 134027725 | 134028813 | 1089 | 666  | 45  | 74.92  | 5.09  | 0.13 |
| chr7 | 134040942 | 134042503 | 1562 | 766  | 84  | 267.54 | 9.48  | 0    |
| chr7 | 134072093 | 134072954 | 862  | 374  | 37  | 85.26  | 7.74  | 0.07 |
| chr7 | 134118674 | 134120426 | 1753 | 877  | 106 | 222.06 | 6.83  | 0    |
| chr7 | 134159899 | 134161536 | 1638 | 974  | 75  | 109.33 | 4.96  | 0.06 |
| chr7 | 134169414 | 134171705 | 2292 | 1635 | 124 | 293.48 | 9.65  | 0    |
| chr7 | 134338991 | 134340108 | 1118 | 546  | 45  | 81.27  | 6.47  | 0.1  |
| chr7 | 134351829 | 134353222 | 1394 | 875  | 63  | 173.32 | 6.47  | 0.07 |
| chr7 | 134375969 | 134377272 | 1304 | 613  | 64  | 147.36 | 6.47  | 0.1  |
| chr7 | 134387329 | 134388570 | 1242 | 669  | 54  | 113.4  | 6.07  | 0.06 |
| chr7 | 134397056 | 134398439 | 1384 | 846  | 66  | 79.52  | 4.72  | 0.1  |
| chr7 | 134403639 | 134404817 | 1179 | 505  | 62  | 202.12 | 9.3   | 0    |
| chr7 | 134488411 | 134490114 | 1704 | 592  | 83  | 119.45 | 4.9   | 0.07 |
| chr7 | 134519130 | 134519923 | 794  | 345  | 29  | 101.91 | 9.82  | 0.05 |
| chr7 | 134549853 | 134550867 | 1015 | 476  | 38  | 93.62  | 8.94  | 0.07 |
| chr7 | 134613939 | 134615593 | 1655 | 508  | 80  | 326.56 | 11.88 | 0    |
| chr7 | 134620772 | 134623169 | 2398 | 1813 | 157 | 420.42 | 9.27  | 0    |
| chr7 | 134655053 | 134657015 | 1963 | 454  | 94  | 144.82 | 5.48  | 0.09 |
| chr7 | 134716160 | 134717253 | 1094 | 608  | 44  | 79.65  | 5.5   | 0.1  |
| chr7 | 134731279 | 134732849 | 1571 | 1004 | 91  | 250.76 | 10.68 | 0    |
| chr7 | 134888512 | 134889972 | 1461 | 1269 | 65  | 104.59 | 4.22  | 0.06 |
| chr7 | 134912127 | 134913871 | 1745 | 1169 | 95  | 267.68 | 11.96 | 0    |
| chr7 | 134919498 | 134921181 | 1684 | 584  | 101 | 183.51 | 6.93  | 0    |
| chr7 | 134984235 | 134986461 | 2227 | 800  | 108 | 146.35 | 5.64  | 0.09 |
| chr7 | 134993463 | 134995368 | 1906 | 945  | 79  | 108.75 | 4.49  | 0.06 |
| chr7 | 135018807 | 135020955 | 2149 | 1603 | 148 | 444.02 | 8.99  | 0    |
| chr7 | 135055488 | 135056563 | 1076 | 592  | 46  | 96.29  | 7.08  | 0.08 |
| chr7 | 135109987 | 135112443 | 2457 | 1074 | 157 | 246.53 | 8.7   | 0    |
| chr7 | 135205784 | 135207211 | 1428 | 1140 | 54  | 115.16 | 5.91  | 0.06 |
| chr7 | 135380256 | 135382385 | 2130 | 1431 | 126 | 191.97 | 5.54  | 0    |
| chr7 | 135561235 | 135562597 | 1363 | 857  | 55  | 112.44 | 5.15  | 0.06 |
| chr7 | 135604481 | 135605786 | 1306 | 728  | 62  | 122.7  | 5.99  | 0.07 |
| chr7 | 135666516 | 135668210 | 1695 | 724  | 81  | 133.43 | 5.39  | 0.08 |
| chr7 | 135754348 | 135755334 | 987  | 541  | 44  | 87.72  | 6.22  | 0.07 |
| chr7 | 135882864 | 135884690 | 1827 | 1145 | 87  | 209.26 | 6.33  | 0    |

|      |           |           |      |      |     |        |       |      |
|------|-----------|-----------|------|------|-----|--------|-------|------|
| chr7 | 137662484 | 137663833 | 1350 | 806  | 81  | 125.79 | 4.77  | 0.07 |
| chr7 | 138009017 | 138010025 | 1009 | 502  | 42  | 71.59  | 5.09  | 0.15 |
| chr7 | 138553499 | 138554665 | 1167 | 538  | 51  | 115.2  | 5.63  | 0.06 |
| chr7 | 139767108 | 139768578 | 1471 | 958  | 53  | 77.53  | 5.5   | 0.12 |
| chr7 | 139904857 | 139905885 | 1029 | 528  | 48  | 106.58 | 7.44  | 0.06 |
| chr7 | 140004570 | 140006173 | 1604 | 1071 | 89  | 319.96 | 10.38 | 0    |
| chr7 | 140043370 | 140044644 | 1275 | 769  | 54  | 131.1  | 6.93  | 0.08 |
| chr7 | 140050639 | 140051864 | 1226 | 256  | 50  | 85.25  | 5.6   | 0.07 |
| chr7 | 140122240 | 140123911 | 1672 | 550  | 69  | 113.22 | 6.93  | 0.06 |
| chr7 | 140313871 | 140315109 | 1239 | 304  | 41  | 103.6  | 7.14  | 0.06 |
| chr7 | 140315209 | 140316561 | 1353 | 863  | 78  | 206.13 | 6.85  | 0    |
| chr7 | 140828325 | 140829832 | 1508 | 385  | 64  | 113.55 | 5.63  | 0.06 |
| chr7 | 142843312 | 142844165 | 854  | 319  | 37  | 75.67  | 7.04  | 0.13 |
| chr7 | 146037438 | 146038819 | 1382 | 502  | 51  | 73.02  | 4.36  | 0.13 |
| chr7 | 146433569 | 146434640 | 1072 | 529  | 42  | 103.25 | 6.98  | 0.06 |
| chr7 | 146574012 | 146575451 | 1440 | 446  | 65  | 191.26 | 8.61  | 0    |
| chr7 | 147176617 | 147178984 | 2368 | 1084 | 101 | 160.68 | 5.09  | 0.11 |
| chr7 | 147221857 | 147223062 | 1206 | 442  | 48  | 84.33  | 4.85  | 0.06 |
| chr7 | 147323065 | 147324081 | 1017 | 578  | 52  | 122.69 | 8.09  | 0.07 |
| chr7 | 148041937 | 148043792 | 1856 | 684  | 81  | 154.33 | 4.85  | 0.1  |
| chr7 | 148067157 | 148068682 | 1526 | 1204 | 76  | 195.49 | 5.98  | 0    |
| chr7 | 148127267 | 148128565 | 1299 | 303  | 63  | 123.59 | 4.96  | 0.07 |
| chr7 | 148139350 | 148140907 | 1558 | 510  | 68  | 157.85 | 6.25  | 0.11 |
| chr7 | 148352841 | 148355004 | 2164 | 980  | 90  | 209.99 | 5.7   | 0    |
| chr7 | 148357993 | 148359179 | 1187 | 466  | 64  | 118.34 | 5.31  | 0.07 |
| chr7 | 148512911 | 148514933 | 2023 | 745  | 198 | 915.95 | 17.53 | 0    |
| chr7 | 148577709 | 148579499 | 1791 | 1333 | 77  | 153.11 | 5.73  | 0.1  |
| chr7 | 148632957 | 148634122 | 1166 | 609  | 54  | 70.94  | 4.76  | 0.16 |
| chr7 | 148646230 | 148648014 | 1785 | 580  | 74  | 89.41  | 5.48  | 0.07 |
| chr7 | 148747773 | 148748874 | 1102 | 528  | 45  | 73.46  | 5.09  | 0.13 |
| chr7 | 149087715 | 149089002 | 1288 | 482  | 62  | 147.31 | 6.41  | 0.1  |
| chr7 | 149559763 | 149561897 | 2135 | 1080 | 106 | 258.01 | 8.12  | 0    |
| chr7 | 149568732 | 149574380 | 5649 | 4975 | 366 | 704.81 | 7.63  | 0    |
| chr7 | 149718675 | 149719676 | 1002 | 501  | 52  | 93     | 5.31  | 0.07 |
| chr7 | 150734336 | 150735688 | 1353 | 807  | 62  | 109.95 | 5.2   | 0.06 |
| chr7 | 152100393 | 152101660 | 1268 | 597  | 51  | 124.15 | 5.26  | 0.07 |
| chr7 | 152468771 | 152470993 | 2223 | 1691 | 99  | 125.57 | 4.56  | 0.07 |
| chr8 | 3278953   | 3279855   | 903  | 522  | 41  | 141.21 | 10.47 | 0.09 |
| chr8 | 3467194   | 3467934   | 741  | 385  | 26  | 89.95  | 9.32  | 0.07 |
| chr8 | 3499612   | 3501098   | 1487 | 841  | 73  | 185.04 | 7.39  | 0    |
| chr8 | 3620826   | 3621902   | 1077 | 535  | 66  | 128.92 | 7.17  | 0.08 |
| chr8 | 3631015   | 3632019   | 1005 | 703  | 42  | 92.2   | 6.01  | 0.07 |
| chr8 | 3675887   | 3677024   | 1138 | 576  | 50  | 75.94  | 5.39  | 0.14 |
| chr8 | 4165700   | 4166750   | 1051 | 519  | 43  | 90.7   | 5.63  | 0.07 |

|      |          |          |      |      |     |        |       |      |
|------|----------|----------|------|------|-----|--------|-------|------|
| chr8 | 4238098  | 4239467  | 1370 | 651  | 67  | 110.91 | 4.7   | 0.06 |
| chr8 | 4275444  | 4276373  | 930  | 469  | 40  | 81.32  | 9.39  | 0.1  |
| chr8 | 4324411  | 4325705  | 1295 | 759  | 61  | 85.85  | 4.41  | 0.07 |
| chr8 | 4612735  | 4613457  | 723  | 527  | 28  | 70.93  | 5.66  | 0.16 |
| chr8 | 4677205  | 4679139  | 1935 | 1326 | 94  | 94.54  | 3.73  | 0.07 |
| chr8 | 9977178  | 9978294  | 1117 | 545  | 44  | 113.29 | 8.09  | 0.06 |
| chr8 | 11008393 | 11010056 | 1664 | 473  | 115 | 193.84 | 6.55  | 0    |
| chr8 | 11497166 | 11498148 | 983  | 460  | 36  | 81.21  | 7.28  | 0.1  |
| chr8 | 11554721 | 11556518 | 1798 | 1225 | 96  | 238.63 | 6.47  | 0    |
| chr8 | 11557060 | 11559017 | 1958 | 880  | 111 | 243.13 | 11.72 | 0    |
| chr8 | 11634514 | 11636120 | 1607 | 1215 | 72  | 70.56  | 3.94  | 0.16 |
| chr8 | 12671633 | 12672573 | 941  | 487  | 36  | 70.89  | 7.39  | 0.16 |
| chr8 | 13104443 | 13106351 | 1909 | 1349 | 96  | 232.88 | 7.42  | 0    |
| chr8 | 13159078 | 13160654 | 1577 | 539  | 63  | 120.4  | 6.47  | 0.07 |
| chr8 | 13674074 | 13678081 | 4008 | 3474 | 184 | 253.43 | 6.26  | 0    |
| chr8 | 14887999 | 14891962 | 3964 | 965  | 217 | 163.46 | 4.38  | 0.06 |
| chr8 | 19784459 | 19785104 | 646  | 333  | 25  | 86.12  | 8.36  | 0.07 |
| chr8 | 20019853 | 20020608 | 756  | 407  | 31  | 90.6   | 9.17  | 0.07 |
| chr8 | 23170819 | 23171742 | 924  | 413  | 38  | 77.44  | 7.08  | 0.12 |
| chr8 | 23508324 | 23509592 | 1269 | 934  | 41  | 100.46 | 7.61  | 0.08 |
| chr8 | 23703924 | 23705064 | 1141 | 563  | 62  | 147.97 | 10.79 | 0.1  |
| chr8 | 23763502 | 23764366 | 865  | 445  | 37  | 75.57  | 6.15  | 0.13 |
| chr8 | 23915488 | 23916693 | 1206 | 455  | 60  | 141.57 | 6.15  | 0.09 |
| chr8 | 23968930 | 23970291 | 1362 | 414  | 67  | 202.04 | 8.09  | 0    |
| chr8 | 26126846 | 26128376 | 1531 | 941  | 85  | 234.85 | 6.74  | 0    |
| chr8 | 26161996 | 26163939 | 1944 | 623  | 88  | 197.74 | 6.33  | 0    |
| chr8 | 26211686 | 26213100 | 1415 | 916  | 66  | 149.47 | 6.74  | 0.1  |
| chr8 | 26310744 | 26312492 | 1749 | 391  | 69  | 158.74 | 6.47  | 0.11 |
| chr8 | 26703713 | 26704580 | 868  | 401  | 29  | 88.18  | 8.26  | 0.07 |
| chr8 | 26706911 | 26708579 | 1669 | 619  | 94  | 319.94 | 9.3   | 0    |
| chr8 | 26711358 | 26713303 | 1946 | 776  | 119 | 287.22 | 7.53  | 0    |
| chr8 | 26864329 | 26865553 | 1225 | 683  | 62  | 121.36 | 6.97  | 0.07 |
| chr8 | 26895138 | 26896529 | 1392 | 459  | 61  | 113.48 | 5.91  | 0.06 |
| chr8 | 26950923 | 26951983 | 1061 | 533  | 43  | 130.68 | 7.14  | 0.08 |
| chr8 | 27086566 | 27087575 | 1010 | 471  | 41  | 133.95 | 9.1   | 0.08 |
| chr8 | 27228906 | 27230709 | 1804 | 642  | 91  | 326.82 | 12.37 | 0    |
| chr8 | 27268076 | 27269830 | 1755 | 1187 | 96  | 174.48 | 6.57  | 0.07 |
| chr8 | 28086269 | 28088087 | 1819 | 1098 | 78  | 94.87  | 4.49  | 0.07 |
| chr8 | 28133220 | 28134830 | 1611 | 1003 | 89  | 243.71 | 8.09  | 0    |
| chr8 | 34763490 | 34764442 | 953  | 703  | 38  | 107.93 | 6.29  | 0.06 |
| chr8 | 34842097 | 34843220 | 1124 | 367  | 57  | 125.11 | 6.29  | 0.07 |
| chr8 | 35209247 | 35210468 | 1222 | 718  | 47  | 95.49  | 5.15  | 0.08 |
| chr8 | 35217178 | 35218178 | 1001 | 469  | 52  | 93.14  | 7.08  | 0.07 |
| chr8 | 36027342 | 36029077 | 1736 | 1328 | 77  | 222.44 | 8.09  | 0    |

|      |          |          |      |      |     |        |       |      |
|------|----------|----------|------|------|-----|--------|-------|------|
| chr8 | 36557855 | 36559072 | 1218 | 652  | 54  | 73.26  | 4.3   | 0.13 |
| chr8 | 36650484 | 36651558 | 1075 | 519  | 41  | 109.39 | 7.19  | 0.06 |
| chr8 | 37311762 | 37313104 | 1343 | 1147 | 60  | 122.05 | 5.18  | 0.07 |
| chr8 | 41596207 | 41597639 | 1433 | 881  | 59  | 155.3  | 10.22 | 0.1  |
| chr8 | 42101295 | 42102201 | 907  | 418  | 34  | 85.32  | 8.52  | 0.07 |
| chr8 | 42458799 | 42460527 | 1729 | 1201 | 85  | 124.07 | 6.86  | 0.07 |
| chr8 | 42502002 | 42502942 | 941  | 360  | 46  | 135.11 | 10.02 | 0.08 |
| chr8 | 46418091 | 46419448 | 1358 | 655  | 69  | 141.38 | 6.93  | 0.09 |
| chr8 | 47060109 | 47061426 | 1318 | 496  | 62  | 77.63  | 4.85  | 0.12 |
| chr8 | 47084799 | 47086130 | 1332 | 842  | 64  | 70.35  | 4.47  | 0.16 |
| chr8 | 47248345 | 47249486 | 1142 | 555  | 61  | 173.76 | 11.96 | 0.07 |
| chr8 | 47296094 | 47297021 | 928  | 520  | 42  | 166.42 | 9.42  | 0.06 |
| chr8 | 47555746 | 47557007 | 1262 | 756  | 63  | 89.02  | 5.24  | 0.07 |
| chr8 | 47824442 | 47825412 | 971  | 504  | 35  | 71.52  | 6.49  | 0.15 |
| chr8 | 47825788 | 47827332 | 1545 | 706  | 81  | 220.67 | 7.74  | 0    |
| chr8 | 48019987 | 48020703 | 717  | 504  | 27  | 86.25  | 8.6   | 0.07 |
| chr8 | 48759885 | 48761632 | 1748 | 793  | 104 | 280.06 | 7.16  | 0    |
| chr8 | 48798842 | 48800369 | 1528 | 917  | 73  | 108.82 | 4.8   | 0.06 |
| chr8 | 54596684 | 54597714 | 1031 | 491  | 42  | 106.42 | 10.11 | 0.06 |
| chr8 | 59029430 | 59030591 | 1162 | 527  | 51  | 86.61  | 5.2   | 0.07 |
| chr8 | 59989700 | 59991298 | 1599 | 1108 | 71  | 220.39 | 9.7   | 0    |
| chr8 | 63368804 | 63369712 | 909  | 381  | 38  | 100.75 | 6.88  | 0.08 |
| chr8 | 63471146 | 63472457 | 1312 | 797  | 60  | 84.83  | 6.32  | 0.06 |
| chr8 | 67470756 | 67471920 | 1165 | 388  | 64  | 196.94 | 8.83  | 0    |
| chr8 | 71613784 | 71614531 | 748  | 520  | 32  | 74.45  | 6.99  | 0.13 |
| chr8 | 72239858 | 72241445 | 1588 | 507  | 105 | 158.88 | 7.9   | 0.11 |
| chr8 | 72314355 | 72315705 | 1351 | 851  | 69  | 241.19 | 11.24 | 0    |
| chr8 | 72332105 | 72333434 | 1330 | 514  | 61  | 168.26 | 9.57  | 0.06 |
| chr8 | 72424858 | 72426321 | 1464 | 785  | 83  | 169.06 | 8.09  | 0.06 |
| chr8 | 72519175 | 72521232 | 2058 | 1491 | 113 | 260.85 | 7.79  | 0    |
| chr8 | 72566176 | 72567087 | 912  | 391  | 38  | 88.93  | 7.36  | 0.07 |
| chr8 | 72654861 | 72655814 | 954  | 446  | 43  | 87.41  | 5.91  | 0.07 |
| chr8 | 72662408 | 72663450 | 1043 | 801  | 49  | 93.13  | 5.49  | 0.07 |
| chr8 | 72806296 | 72807807 | 1512 | 960  | 70  | 249.21 | 9.1   | 0    |
| chr8 | 72825895 | 72826961 | 1067 | 495  | 55  | 130.33 | 10.27 | 0.08 |
| chr8 | 72962869 | 72964126 | 1258 | 848  | 70  | 146.34 | 6.16  | 0.09 |
| chr8 | 73033728 | 73034909 | 1182 | 612  | 68  | 144.07 | 7.57  | 0.09 |
| chr8 | 73046282 | 73047637 | 1356 | 717  | 74  | 192.65 | 9.71  | 0    |
| chr8 | 73050990 | 73052436 | 1447 | 1011 | 65  | 132.1  | 5.83  | 0.08 |
| chr8 | 73061661 | 73064133 | 2473 | 1084 | 143 | 383.76 | 8.09  | 0    |
| chr8 | 73067862 | 73068670 | 809  | 400  | 42  | 85.46  | 5.12  | 0.07 |
| chr8 | 73131623 | 73136068 | 4446 | 1879 | 275 | 396.38 | 5.46  | 0    |
| chr8 | 73183206 | 73184130 | 925  | 470  | 37  | 77.36  | 5.63  | 0.12 |
| chr8 | 73196626 | 73197886 | 1261 | 752  | 64  | 131.94 | 5.78  | 0.08 |

|      |          |          |      |      |     |        |       |      |
|------|----------|----------|------|------|-----|--------|-------|------|
| chr8 | 73222083 | 73225182 | 3100 | 799  | 204 | 257.2  | 7.39  | 0    |
| chr8 | 73299940 | 73302350 | 2411 | 635  | 150 | 350.02 | 8.36  | 0    |
| chr8 | 73315752 | 73316917 | 1166 | 502  | 61  | 93.23  | 5.09  | 0.07 |
| chr8 | 73320582 | 73321544 | 963  | 763  | 41  | 105.48 | 6.25  | 0.06 |
| chr8 | 73327685 | 73329264 | 1580 | 1159 | 55  | 96.88  | 4.97  | 0.08 |
| chr8 | 73356839 | 73357763 | 925  | 377  | 46  | 190.79 | 10.18 | 0    |
| chr8 | 73362523 | 73364137 | 1615 | 936  | 77  | 120.17 | 5.22  | 0.07 |
| chr8 | 73396786 | 73398202 | 1417 | 592  | 78  | 194.66 | 9.65  | 0    |
| chr8 | 73420921 | 73421979 | 1059 | 569  | 47  | 97.62  | 5.5   | 0.08 |
| chr8 | 73795888 | 73797538 | 1651 | 648  | 72  | 130.5  | 5.29  | 0.08 |
| chr8 | 73890515 | 73891954 | 1440 | 754  | 73  | 97.76  | 4.27  | 0.08 |
| chr8 | 73894810 | 73895955 | 1146 | 693  | 68  | 177.34 | 6.82  | 0.07 |
| chr8 | 73904889 | 73906416 | 1528 | 454  | 62  | 95.44  | 4.2   | 0.08 |
| chr8 | 73988121 | 73989243 | 1123 | 623  | 44  | 71.66  | 4.67  | 0.15 |
| chr8 | 73992507 | 73993636 | 1130 | 624  | 67  | 162.01 | 10.88 | 0.11 |
| chr8 | 74060957 | 74062344 | 1388 | 425  | 56  | 71.35  | 5.39  | 0.15 |
| chr8 | 74115104 | 74116906 | 1803 | 985  | 103 | 189.85 | 8.34  | 0    |
| chr8 | 74134656 | 74135683 | 1028 | 505  | 47  | 127.42 | 10.79 | 0.07 |
| chr8 | 74200078 | 74201008 | 931  | 453  | 35  | 82.14  | 6.07  | 0.1  |
| chr8 | 74659116 | 74660443 | 1328 | 754  | 58  | 174.38 | 5.84  | 0.07 |
| chr8 | 74684147 | 74685772 | 1626 | 786  | 106 | 169.81 | 5.33  | 0.06 |
| chr8 | 74842369 | 74843430 | 1062 | 580  | 45  | 73.53  | 4.62  | 0.13 |
| chr8 | 74967194 | 74968143 | 950  | 451  | 39  | 78.94  | 6.07  | 0.1  |
| chr8 | 74998400 | 74999654 | 1255 | 685  | 61  | 118.67 | 6.07  | 0.07 |
| chr8 | 75016097 | 75017192 | 1096 | 544  | 70  | 210.07 | 13.69 | 0    |
| chr8 | 75071683 | 75072960 | 1278 | 756  | 54  | 147.92 | 7.24  | 0.1  |
| chr8 | 75094430 | 75096201 | 1772 | 438  | 90  | 124.45 | 5.55  | 0.07 |
| chr8 | 77617208 | 77618151 | 944  | 471  | 42  | 84.08  | 6.22  | 0.06 |
| chr8 | 81032646 | 81033715 | 1070 | 897  | 39  | 100.77 | 5.01  | 0.08 |
| chr8 | 81344462 | 81345377 | 916  | 369  | 40  | 78.5   | 4.98  | 0.12 |
| chr8 | 81898215 | 81899463 | 1249 | 189  | 53  | 74.94  | 4.32  | 0.13 |
| chr8 | 82162452 | 82164540 | 2089 | 542  | 99  | 140.53 | 5.64  | 0.09 |
| chr8 | 82235046 | 82236111 | 1066 | 571  | 70  | 109.11 | 8.84  | 0.06 |
| chr8 | 83538117 | 83539900 | 1784 | 937  | 90  | 220.2  | 7.42  | 0    |
| chr8 | 85386759 | 85388282 | 1524 | 429  | 67  | 148.12 | 6.68  | 0.1  |
| chr8 | 85688970 | 85690046 | 1077 | 583  | 49  | 93.73  | 6.59  | 0.07 |
| chr8 | 85855855 | 85856884 | 1030 | 471  | 43  | 99.12  | 7.36  | 0.08 |
| chr8 | 86117936 | 86118995 | 1060 | 550  | 44  | 88.84  | 7.08  | 0.07 |
| chr8 | 86131402 | 86132954 | 1553 | 833  | 86  | 153.28 | 5.88  | 0.1  |
| chr8 | 86175908 | 86176876 | 969  | 511  | 55  | 111.8  | 7.08  | 0.06 |
| chr8 | 86222620 | 86223654 | 1035 | 574  | 46  | 125.12 | 8.73  | 0.07 |
| chr8 | 86264738 | 86265972 | 1235 | 310  | 48  | 105.04 | 5.38  | 0.06 |
| chr8 | 86512817 | 86513719 | 903  | 505  | 32  | 93.1   | 9.1   | 0.07 |
| chr8 | 86520216 | 86521683 | 1468 | 519  | 56  | 167.98 | 9.22  | 0.06 |

|      |          |          |      |      |     |         |       |      |
|------|----------|----------|------|------|-----|---------|-------|------|
| chr8 | 86522185 | 86523279 | 1095 | 639  | 46  | 105.96  | 6.62  | 0.06 |
| chr8 | 86528057 | 86529368 | 1312 | 722  | 63  | 196.66  | 8.52  | 0    |
| chr8 | 86589826 | 86591895 | 2070 | 712  | 138 | 216.1   | 5.59  | 0    |
| chr8 | 86715793 | 86716699 | 907  | 432  | 46  | 148.34  | 12.14 | 0.1  |
| chr8 | 86721065 | 86723003 | 1939 | 1266 | 124 | 198.07  | 4.65  | 0    |
| chr8 | 86724264 | 86728967 | 4704 | 3371 | 353 | 664.06  | 7.1   | 0    |
| chr8 | 86733658 | 86734986 | 1329 | 818  | 56  | 98.44   | 4.65  | 0.08 |
| chr8 | 86760643 | 86761900 | 1258 | 708  | 57  | 79.84   | 5.56  | 0.1  |
| chr8 | 86793690 | 86794835 | 1146 | 688  | 53  | 152.22  | 8.09  | 0.1  |
| chr8 | 86938220 | 86938923 | 704  | 310  | 25  | 88.09   | 6.99  | 0.07 |
| chr8 | 87162732 | 87164151 | 1420 | 441  | 61  | 210.17  | 8.87  | 0    |
| chr8 | 87184575 | 87187221 | 2647 | 1058 | 152 | 288.67  | 7.84  | 0    |
| chr8 | 87187540 | 87188570 | 1031 | 533  | 43  | 94.88   | 9.27  | 0.07 |
| chr8 | 87188667 | 87189544 | 878  | 400  | 36  | 73.71   | 6.41  | 0.13 |
| chr8 | 87224805 | 87225981 | 1177 | 499  | 55  | 86.54   | 4.96  | 0.07 |
| chr8 | 87228678 | 87230190 | 1513 | 774  | 93  | 305.61  | 11.81 | 0    |
| chr8 | 87355665 | 87356750 | 1086 | 457  | 46  | 100.89  | 6.68  | 0.08 |
| chr8 | 87363869 | 87365218 | 1350 | 841  | 75  | 118.08  | 5.39  | 0.07 |
| chr8 | 87370255 | 87371834 | 1580 | 499  | 96  | 186.74  | 6.42  | 0    |
| chr8 | 87380483 | 87381436 | 954  | 588  | 42  | 92.78   | 6.41  | 0.07 |
| chr8 | 87432114 | 87433156 | 1043 | 522  | 44  | 96.55   | 5.98  | 0.08 |
| chr8 | 87492282 | 87493777 | 1496 | 1153 | 69  | 164.8   | 7.48  | 0.06 |
| chr8 | 87499217 | 87505668 | 6452 | 3389 | 465 | 1368.97 | 13.87 | 0    |
| chr8 | 87508961 | 87510381 | 1421 | 799  | 74  | 72.22   | 4.14  | 0.15 |
| chr8 | 87513547 | 87514950 | 1404 | 824  | 66  | 81.76   | 5.32  | 0.1  |
| chr8 | 87548775 | 87550092 | 1318 | 872  | 50  | 80.71   | 4.21  | 0.1  |
| chr8 | 87550212 | 87551765 | 1554 | 592  | 77  | 158.67  | 5.69  | 0.11 |
| chr8 | 87559683 | 87561364 | 1682 | 1290 | 77  | 216.41  | 8.66  | 0    |
| chr8 | 87595128 | 87596512 | 1385 | 812  | 63  | 87.59   | 5.31  | 0.07 |
| chr8 | 87606792 | 87607935 | 1144 | 429  | 61  | 142.25  | 8.69  | 0.09 |
| chr8 | 87956468 | 87957227 | 760  | 394  | 36  | 117.29  | 9.37  | 0.07 |
| chr8 | 88364189 | 88365351 | 1163 | 424  | 54  | 111.1   | 7.16  | 0.06 |
| chr8 | 89269312 | 89270495 | 1184 | 788  | 42  | 88.53   | 5.26  | 0.07 |
| chr8 | 90722552 | 90723545 | 994  | 655  | 46  | 119.04  | 6.95  | 0.07 |
| chr8 | 90885322 | 90886301 | 980  | 525  | 39  | 130.62  | 9.46  | 0.08 |
| chr8 | 91158904 | 91160074 | 1171 | 466  | 44  | 82.09   | 4.39  | 0.1  |
| chr8 | 93399972 | 93401720 | 1749 | 1213 | 79  | 101.6   | 5.71  | 0.08 |
| chr8 | 93431620 | 93432844 | 1225 | 470  | 54  | 146.35  | 6.47  | 0.09 |
| chr8 | 93593697 | 93595214 | 1518 | 699  | 78  | 187.1   | 6.14  | 0    |
| chr8 | 93657502 | 93658629 | 1128 | 495  | 54  | 84.1    | 4.8   | 0.06 |
| chr8 | 96560647 | 96561692 | 1046 | 570  | 44  | 130.45  | 7.64  | 0.08 |
| chr8 | 97056459 | 97057408 | 950  | 487  | 35  | 70.9    | 6.31  | 0.16 |
| chr8 | 97124983 | 97126278 | 1296 | 953  | 63  | 115.77  | 5.3   | 0.07 |
| chr8 | 97227220 | 97228405 | 1186 | 731  | 55  | 157.88  | 8.5   | 0.11 |

|      |           |           |      |      |     |        |       |      |
|------|-----------|-----------|------|------|-----|--------|-------|------|
| chr8 | 97361827  | 97362977  | 1151 | 511  | 60  | 198.33 | 9.79  | 0    |
| chr8 | 97603837  | 97604940  | 1104 | 616  | 45  | 82.88  | 5.18  | 0.11 |
| chr8 | 97855339  | 97856715  | 1377 | 493  | 61  | 170.38 | 7.51  | 0.06 |
| chr8 | 98330930  | 98332364  | 1435 | 1089 | 81  | 257.31 | 10.49 | 0    |
| chr8 | 98412083  | 98412883  | 801  | 331  | 28  | 87.99  | 8.63  | 0.07 |
| chr8 | 106863744 | 106865849 | 2106 | 565  | 101 | 193.92 | 5.99  | 0    |
| chr8 | 106966356 | 106967297 | 942  | 531  | 41  | 89.47  | 7.08  | 0.07 |
| chr8 | 107057902 | 107058743 | 842  | 522  | 38  | 116.74 | 10.22 | 0.07 |
| chr8 | 107165140 | 107166087 | 948  | 449  | 41  | 79     | 6.53  | 0.1  |
| chr8 | 107695157 | 107695996 | 840  | 435  | 29  | 83.16  | 6.57  | 0.08 |
| chr8 | 107748639 | 107749569 | 931  | 344  | 44  | 77.05  | 6.74  | 0.12 |
| chr8 | 107871400 | 107872274 | 875  | 487  | 31  | 75.01  | 9.09  | 0.13 |
| chr8 | 108128586 | 108129640 | 1055 | 323  | 53  | 186.03 | 10.79 | 0    |
| chr8 | 108159301 | 108161412 | 2112 | 1096 | 97  | 234.03 | 8.46  | 0    |
| chr8 | 108350752 | 108351803 | 1052 | 392  | 47  | 83.13  | 5.2   | 0.11 |
| chr8 | 108378597 | 108379690 | 1094 | 433  | 52  | 84.91  | 6.79  | 0.06 |
| chr8 | 108423916 | 108424983 | 1068 | 430  | 65  | 194.25 | 11.65 | 0    |
| chr8 | 108514467 | 108515999 | 1533 | 483  | 71  | 75.11  | 4.37  | 0.13 |
| chr8 | 108582546 | 108583805 | 1260 | 652  | 67  | 162.07 | 7.47  | 0.11 |
| chr8 | 108692169 | 108693172 | 1004 | 447  | 38  | 77.89  | 6.62  | 0.12 |
| chr8 | 108733908 | 108735497 | 1590 | 997  | 73  | 169.76 | 7.74  | 0.06 |
| chr8 | 108861434 | 108862852 | 1419 | 520  | 62  | 107.99 | 4.79  | 0.06 |
| chr8 | 108938773 | 108940068 | 1296 | 527  | 62  | 131.02 | 7.47  | 0.08 |
| chr8 | 109416674 | 109417854 | 1181 | 909  | 40  | 124.03 | 6.57  | 0.07 |
| chr8 | 109459150 | 109460194 | 1045 | 563  | 48  | 185.75 | 11.33 | 0    |
| chr8 | 109554697 | 109555615 | 919  | 548  | 49  | 142.27 | 9.5   | 0.09 |
| chr8 | 109571698 | 109573051 | 1354 | 722  | 77  | 137.99 | 5.71  | 0.09 |
| chr8 | 109619775 | 109620836 | 1062 | 596  | 45  | 99.04  | 6.68  | 0.08 |
| chr8 | 109674046 | 109675092 | 1047 | 530  | 46  | 126.35 | 8.9   | 0.07 |
| chr8 | 109816672 | 109817800 | 1129 | 571  | 49  | 124.06 | 6.55  | 0.07 |
| chr8 | 109959747 | 109961031 | 1285 | 469  | 60  | 193.36 | 8.99  | 0    |
| chr8 | 110111640 | 110112642 | 1003 | 708  | 55  | 147.92 | 8.09  | 0.1  |
| chr8 | 111238353 | 111239093 | 741  | 309  | 25  | 83.62  | 8.74  | 0.06 |
| chr8 | 111271920 | 111272903 | 984  | 540  | 35  | 87     | 6.71  | 0.07 |
| chr8 | 112089104 | 112090320 | 1217 | 555  | 58  | 100.02 | 5.3   | 0.08 |
| chr8 | 112216522 | 112217896 | 1375 | 825  | 81  | 182.64 | 7.01  | 0    |
| chr8 | 112228768 | 112229815 | 1048 | 651  | 42  | 91.89  | 5.15  | 0.07 |
| chr8 | 112260844 | 112261925 | 1082 | 789  | 57  | 187.46 | 10.52 | 0    |
| chr8 | 112302055 | 112303485 | 1431 | 742  | 67  | 191.08 | 6.07  | 0    |
| chr8 | 112391808 | 112392716 | 909  | 582  | 40  | 99.7   | 6.62  | 0.08 |
| chr8 | 113370077 | 113371594 | 1518 | 788  | 84  | 209.84 | 8.71  | 0    |
| chr8 | 113493762 | 113494720 | 959  | 439  | 35  | 73.8   | 6.93  | 0.13 |
| chr8 | 113551120 | 113552258 | 1139 | 547  | 47  | 99.1   | 5.98  | 0.08 |
| chr8 | 113782109 | 113783845 | 1737 | 979  | 93  | 155.86 | 6.62  | 0.11 |

|      |           |           |      |      |     |        |       |      |
|------|-----------|-----------|------|------|-----|--------|-------|------|
| chr8 | 113823036 | 113824577 | 1542 | 1245 | 66  | 149.23 | 5.87  | 0.1  |
| chr8 | 114167225 | 114168224 | 1000 | 524  | 54  | 92.92  | 7.14  | 0.07 |
| chr8 | 114399906 | 114401001 | 1096 | 423  | 53  | 213.16 | 14.02 | 0    |
| chr8 | 114464263 | 114465060 | 798  | 391  | 29  | 71.87  | 5.54  | 0.15 |
| chr8 | 116158789 | 116160194 | 1406 | 835  | 64  | 118.45 | 5.69  | 0.07 |
| chr8 | 116657155 | 116658035 | 881  | 466  | 32  | 95.72  | 8.6   | 0.08 |
| chr8 | 118230134 | 118232623 | 2490 | 1128 | 152 | 562.26 | 9.54  | 0    |
| chr8 | 119256291 | 119257193 | 903  | 568  | 35  | 114.8  | 8.87  | 0.06 |
| chr8 | 119681125 | 119682391 | 1267 | 699  | 65  | 122.74 | 6.2   | 0.07 |
| chr8 | 119779621 | 119780703 | 1083 | 566  | 42  | 78.13  | 4.76  | 0.12 |
| chr8 | 120021901 | 120022767 | 867  | 322  | 53  | 223.18 | 12.59 | 0    |
| chr8 | 121918133 | 121919134 | 1002 | 669  | 56  | 133.61 | 6.93  | 0.08 |
| chr8 | 121960451 | 121961648 | 1198 | 698  | 49  | 95.34  | 5.39  | 0.07 |
| chr8 | 122081831 | 122083315 | 1485 | 507  | 73  | 144.67 | 5.86  | 0.09 |
| chr8 | 122098328 | 122099510 | 1183 | 756  | 51  | 135.38 | 8.9   | 0.08 |
| chr8 | 122301699 | 122302676 | 978  | 507  | 41  | 79.96  | 6.15  | 0.1  |
| chr8 | 122336639 | 122337457 | 819  | 474  | 32  | 80.09  | 5.66  | 0.1  |
| chr8 | 122363083 | 122365079 | 1997 | 1347 | 129 | 200.36 | 8.09  | 0    |
| chr8 | 123010567 | 123012098 | 1532 | 485  | 73  | 127.88 | 5.3   | 0.08 |
| chr8 | 123059909 | 123064481 | 4573 | 3363 | 236 | 250.59 | 4.77  | 0    |
| chr8 | 123191599 | 123192682 | 1084 | 638  | 47  | 89.03  | 5.6   | 0.07 |
| chr8 | 123259723 | 123261580 | 1858 | 573  | 102 | 274.86 | 12.14 | 0    |
| chr8 | 123631800 | 123632955 | 1156 | 630  | 53  | 76.71  | 6.32  | 0.12 |
| chr8 | 124109057 | 124109959 | 903  | 246  | 47  | 120.67 | 6.15  | 0.07 |
| chr8 | 124113771 | 124114886 | 1116 | 676  | 49  | 135.14 | 8.58  | 0.08 |
| chr8 | 124176593 | 124177405 | 813  | 379  | 37  | 129.24 | 9.99  | 0.08 |
| chr8 | 124353005 | 124354078 | 1074 | 501  | 57  | 109.48 | 6.26  | 0.06 |
| chr8 | 124473490 | 124474966 | 1477 | 532  | 84  | 112.63 | 4.65  | 0.06 |
| chr8 | 124804778 | 124806201 | 1424 | 465  | 69  | 106.17 | 5.56  | 0.06 |
| chr8 | 124953678 | 124955001 | 1324 | 754  | 64  | 71.25  | 4.26  | 0.15 |
| chr8 | 124955318 | 124957294 | 1977 | 1479 | 136 | 285.05 | 7.64  | 0    |
| chr8 | 124966790 | 124968633 | 1844 | 735  | 88  | 114.51 | 4.76  | 0.06 |
| chr8 | 124999492 | 125000676 | 1185 | 544  | 96  | 466.66 | 26.13 | 0    |
| chr8 | 125074656 | 125075989 | 1334 | 520  | 59  | 149.93 | 7.71  | 0.1  |
| chr8 | 125079998 | 125081276 | 1279 | 660  | 64  | 116.5  | 5.39  | 0.07 |
| chr8 | 125134761 | 125135931 | 1171 | 566  | 55  | 73.99  | 4.52  | 0.13 |
| chr8 | 125564529 | 125565529 | 1001 | 555  | 42  | 129.6  | 6.51  | 0.08 |
| chr8 | 125565717 | 125566986 | 1270 | 831  | 77  | 166.01 | 8.09  | 0.06 |
| chr8 | 125588591 | 125590123 | 1533 | 800  | 74  | 147.35 | 5.39  | 0.1  |
| chr8 | 125625837 | 125626749 | 913  | 369  | 57  | 211.47 | 9.63  | 0    |
| chr8 | 125748249 | 125749424 | 1176 | 521  | 50  | 71.63  | 5.39  | 0.15 |
| chr8 | 125897055 | 125898813 | 1759 | 635  | 92  | 148.63 | 5.15  | 0.1  |
| chr8 | 126329508 | 126330483 | 976  | 472  | 41  | 148.01 | 10.79 | 0.1  |
| chr8 | 126382943 | 126383977 | 1035 | 494  | 42  | 128.17 | 9.04  | 0.08 |

|      |           |           |      |      |     |        |       |      |
|------|-----------|-----------|------|------|-----|--------|-------|------|
| chr8 | 126472551 | 126473651 | 1101 | 664  | 87  | 277.5  | 13.75 | 0    |
| chr8 | 126506428 | 126507469 | 1042 | 547  | 50  | 159.21 | 9.37  | 0.11 |
| chr8 | 127044252 | 127045326 | 1075 | 480  | 53  | 91.64  | 6.26  | 0.07 |
| chr8 | 127245468 | 127246598 | 1131 | 408  | 44  | 70.82  | 4.36  | 0.16 |
| chr8 | 127473174 | 127473992 | 819  | 371  | 32  | 90.97  | 8.54  | 0.07 |
| chr8 | 128998409 | 128999282 | 874  | 513  | 32  | 90.14  | 7.61  | 0.07 |
| chr8 | 129107137 | 129109186 | 2050 | 1212 | 90  | 171.42 | 7.12  | 0.06 |
| chr8 | 129111322 | 129113558 | 2237 | 1393 | 115 | 273.43 | 5.9   | 0    |
| chr8 | 129113598 | 129117529 | 3932 | 1849 | 234 | 521.63 | 8.01  | 0    |
| chr8 | 129117686 | 129120783 | 3098 | 341  | 202 | 375.22 | 7.19  | 0    |
| chr8 | 129392295 | 129393967 | 1673 | 1308 | 66  | 92.75  | 5.59  | 0.07 |
| chr8 | 129964687 | 129965703 | 1017 | 531  | 39  | 96.75  | 6.71  | 0.08 |
| chr8 | 130880793 | 130881831 | 1039 | 488  | 43  | 114.97 | 8.34  | 0.06 |
| chr8 | 130882191 | 130883800 | 1610 | 558  | 68  | 166    | 8.48  | 0.06 |
| chr8 | 131208811 | 131210232 | 1422 | 773  | 73  | 285.84 | 10.62 | 0    |
| chr9 | 3001946   | 3003190   | 1245 | 194  | 143 | 74.53  | 3.66  | 0.13 |
| chr9 | 3403455   | 3404409   | 955  | 429  | 36  | 104.85 | 7.73  | 0.06 |
| chr9 | 7836636   | 7837958   | 1323 | 242  | 69  | 120.05 | 5.06  | 0.07 |
| chr9 | 7872475   | 7873508   | 1034 | 394  | 55  | 135.72 | 7.78  | 0.08 |
| chr9 | 13269350  | 13270052  | 703  | 435  | 26  | 80.34  | 7.94  | 0.1  |
| chr9 | 13553225  | 13554405  | 1181 | 521  | 57  | 227.56 | 10.25 | 0    |
| chr9 | 13630850  | 13632846  | 1997 | 1256 | 119 | 242.25 | 7.08  | 0    |
| chr9 | 14184830  | 14185828  | 999  | 550  | 52  | 219.62 | 12.69 | 0    |
| chr9 | 14304694  | 14305644  | 951  | 427  | 42  | 104.49 | 8.09  | 0.06 |
| chr9 | 14849332  | 14850641  | 1310 | 501  | 51  | 91.49  | 5.06  | 0.07 |
| chr9 | 15083730  | 15084862  | 1133 | 717  | 58  | 77.6   | 4.81  | 0.12 |
| chr9 | 15110234  | 15111288  | 1055 | 455  | 45  | 88.77  | 7.12  | 0.07 |
| chr9 | 20189113  | 20190170  | 1058 | 508  | 46  | 73.73  | 6.42  | 0.13 |
| chr9 | 20263864  | 20264796  | 933  | 436  | 35  | 87.51  | 7.66  | 0.07 |
| chr9 | 20296671  | 20297663  | 993  | 513  | 43  | 131.99 | 10.34 | 0.08 |
| chr9 | 20411242  | 20412534  | 1293 | 428  | 62  | 111.74 | 5.3   | 0.06 |
| chr9 | 20455783  | 20457068  | 1286 | 776  | 69  | 131.84 | 6     | 0.08 |
| chr9 | 20806719  | 20807970  | 1252 | 597  | 83  | 245.95 | 11.09 | 0    |
| chr9 | 20819415  | 20820840  | 1426 | 1052 | 55  | 76.9   | 5.03  | 0.12 |
| chr9 | 20877340  | 20878456  | 1117 | 623  | 67  | 215.25 | 8.79  | 0    |
| chr9 | 20895799  | 20896898  | 1100 | 516  | 62  | 128.82 | 6     | 0.08 |
| chr9 | 20935018  | 20936187  | 1170 | 947  | 50  | 76.49  | 4.18  | 0.12 |
| chr9 | 20971959  | 20973290  | 1332 | 838  | 57  | 103.06 | 5.6   | 0.06 |
| chr9 | 21042647  | 21044182  | 1536 | 719  | 91  | 282.63 | 8.44  | 0    |
| chr9 | 21069229  | 21070352  | 1124 | 581  | 61  | 126.05 | 9.17  | 0.07 |
| chr9 | 21313977  | 21315353  | 1377 | 695  | 75  | 185.26 | 7.78  | 0    |
| chr9 | 21350211  | 21351874  | 1664 | 620  | 73  | 150.32 | 5.39  | 0.1  |
| chr9 | 21396681  | 21397839  | 1159 | 512  | 51  | 92.16  | 4.79  | 0.07 |
| chr9 | 21419776  | 21421430  | 1655 | 445  | 87  | 276.88 | 8.9   | 0    |

|      |          |          |      |      |     |        |       |      |
|------|----------|----------|------|------|-----|--------|-------|------|
| chr9 | 21527402 | 21529352 | 1951 | 1404 | 99  | 150.59 | 7.11  | 0.1  |
| chr9 | 21875322 | 21876356 | 1035 | 632  | 53  | 131.51 | 7.44  | 0.08 |
| chr9 | 21889127 | 21890308 | 1182 | 295  | 45  | 79.39  | 4.38  | 0.1  |
| chr9 | 21969029 | 21969992 | 964  | 549  | 38  | 113.68 | 7.14  | 0.06 |
| chr9 | 22131969 | 22133022 | 1054 | 242  | 52  | 95.05  | 4.58  | 0.07 |
| chr9 | 22193237 | 22194292 | 1056 | 454  | 52  | 179.21 | 11.24 | 0    |
| chr9 | 22215567 | 22216220 | 654  | 222  | 25  | 94.63  | 7.57  | 0.07 |
| chr9 | 25059108 | 25061123 | 2016 | 936  | 115 | 328.03 | 9.44  | 0    |
| chr9 | 26837097 | 26838569 | 1473 | 553  | 70  | 116.07 | 5.39  | 0.07 |
| chr9 | 30837245 | 30838582 | 1338 | 700  | 80  | 252.96 | 9.85  | 0    |
| chr9 | 31087222 | 31088989 | 1768 | 1051 | 85  | 205.16 | 6.63  | 0    |
| chr9 | 31193223 | 31194204 | 982  | 488  | 45  | 146.06 | 9.89  | 0.09 |
| chr9 | 32323490 | 32324764 | 1275 | 272  | 55  | 101.87 | 4.69  | 0.05 |
| chr9 | 32347453 | 32349432 | 1980 | 1362 | 110 | 335.56 | 8.94  | 0    |
| chr9 | 35017930 | 35019292 | 1363 | 874  | 89  | 164.12 | 6.6   | 0.06 |
| chr9 | 35112351 | 35113329 | 979  | 641  | 441 | 207.01 | 4.81  | 0    |
| chr9 | 35377099 | 35378167 | 1069 | 500  | 44  | 77.66  | 4.36  | 0.12 |
| chr9 | 36574767 | 36576503 | 1737 | 525  | 83  | 77.09  | 3.64  | 0.12 |
| chr9 | 37035007 | 37036477 | 1471 | 447  | 55  | 74.33  | 3.9   | 0.13 |
| chr9 | 37062063 | 37063615 | 1553 | 1086 | 66  | 123.29 | 5.18  | 0.07 |
| chr9 | 37155651 | 37156517 | 867  | 389  | 41  | 89.83  | 5.91  | 0.07 |
| chr9 | 37296376 | 37297267 | 892  | 349  | 37  | 97.54  | 8.5   | 0.08 |
| chr9 | 40262637 | 40263822 | 1186 | 699  | 51  | 83.74  | 5.2   | 0.06 |
| chr9 | 40589977 | 40590926 | 950  | 496  | 34  | 70.07  | 6.55  | 0.16 |
| chr9 | 40608251 | 40610230 | 1980 | 774  | 110 | 166.83 | 5.62  | 0.06 |
| chr9 | 40964810 | 40965967 | 1158 | 342  | 42  | 104.98 | 5.84  | 0.06 |
| chr9 | 41758714 | 41759734 | 1021 | 503  | 41  | 102.35 | 6.88  | 0.05 |
| chr9 | 42071983 | 42072877 | 895  | 333  | 30  | 76.79  | 7.61  | 0.12 |
| chr9 | 44041288 | 44043190 | 1903 | 609  | 97  | 215.26 | 7.16  | 0    |
| chr9 | 44075790 | 44076695 | 906  | 433  | 32  | 95.44  | 9.34  | 0.08 |
| chr9 | 44113286 | 44114379 | 1094 | 541  | 53  | 84.47  | 4.55  | 0.06 |
| chr9 | 44134233 | 44135484 | 1252 | 679  | 56  | 102.52 | 5.39  | 0.06 |
| chr9 | 44142156 | 44143336 | 1181 | 648  | 80  | 313.08 | 15.8  | 0    |
| chr9 | 44187089 | 44188075 | 987  | 320  | 42  | 74.17  | 4.79  | 0.13 |
| chr9 | 44214638 | 44216284 | 1647 | 962  | 73  | 161.89 | 6.68  | 0.11 |
| chr9 | 44322965 | 44323867 | 903  | 437  | 31  | 70.46  | 7.24  | 0.16 |
| chr9 | 44411258 | 44413929 | 2672 | 2085 | 142 | 319.79 | 6.89  | 0    |
| chr9 | 44575277 | 44576309 | 1033 | 611  | 44  | 170.61 | 10.4  | 0.06 |
| chr9 | 44580519 | 44581454 | 936  | 514  | 35  | 81.56  | 9.3   | 0.1  |
| chr9 | 44689174 | 44690243 | 1070 | 678  | 46  | 167.87 | 10.79 | 0.06 |
| chr9 | 44728286 | 44729479 | 1194 | 626  | 56  | 98.72  | 5.58  | 0.08 |
| chr9 | 44773090 | 44774140 | 1051 | 636  | 56  | 119.45 | 8.37  | 0.07 |
| chr9 | 44794158 | 44795080 | 923  | 462  | 34  | 83.45  | 6.39  | 0.06 |
| chr9 | 45055483 | 45056583 | 1101 | 567  | 46  | 82.55  | 6.53  | 0.11 |

|      |          |          |      |      |     |        |       |      |
|------|----------|----------|------|------|-----|--------|-------|------|
| chr9 | 45074282 | 45077755 | 3474 | 2952 | 167 | 247.97 | 6.26  | 0    |
| chr9 | 45713769 | 45715454 | 1686 | 1273 | 85  | 178.02 | 7.49  | 0.07 |
| chr9 | 45762509 | 45763406 | 898  | 383  | 32  | 76     | 6.39  | 0.14 |
| chr9 | 45792469 | 45793430 | 962  | 479  | 38  | 130.14 | 11.87 | 0.08 |
| chr9 | 45820890 | 45821930 | 1041 | 233  | 38  | 98.43  | 5     | 0.08 |
| chr9 | 46080746 | 46081801 | 1056 | 568  | 53  | 134.99 | 8.76  | 0.08 |
| chr9 | 47337876 | 47339045 | 1170 | 569  | 50  | 158.42 | 7.61  | 0.11 |
| chr9 | 48302680 | 48304423 | 1744 | 388  | 88  | 253.49 | 8.09  | 0    |
| chr9 | 48792624 | 48794134 | 1511 | 564  | 89  | 158.86 | 6.7   | 0.11 |
| chr9 | 48863165 | 48864235 | 1071 | 482  | 43  | 113.66 | 8.09  | 0.06 |
| chr9 | 50335761 | 50337252 | 1492 | 954  | 70  | 127.05 | 6.93  | 0.07 |
| chr9 | 50575731 | 50576934 | 1204 | 544  | 72  | 200.01 | 9.02  | 0    |
| chr9 | 50583168 | 50584205 | 1038 | 194  | 41  | 82.18  | 4.2   | 0.1  |
| chr9 | 50816508 | 50817235 | 728  | 494  | 28  | 97.21  | 7.01  | 0.08 |
| chr9 | 53055813 | 53056704 | 892  | 481  | 32  | 70.74  | 6.01  | 0.16 |
| chr9 | 53191832 | 53192893 | 1062 | 558  | 50  | 105.94 | 6.53  | 0.06 |
| chr9 | 53474778 | 53476009 | 1232 | 553  | 68  | 149.24 | 6.97  | 0.1  |
| chr9 | 54581967 | 54582836 | 870  | 509  | 39  | 105.68 | 6.93  | 0.06 |
| chr9 | 55056258 | 55057160 | 903  | 433  | 36  | 133.99 | 10.4  | 0.08 |
| chr9 | 55785365 | 55786209 | 845  | 651  | 32  | 76.95  | 5.66  | 0.12 |
| chr9 | 55889184 | 55890295 | 1112 | 524  | 50  | 131.93 | 7.32  | 0.08 |
| chr9 | 56265069 | 56267210 | 2142 | 931  | 110 | 244.53 | 6.85  | 0    |
| chr9 | 56775535 | 56776648 | 1114 | 440  | 50  | 166.79 | 7.61  | 0.06 |
| chr9 | 56842446 | 56843719 | 1274 | 979  | 49  | 113.04 | 6.47  | 0.06 |
| chr9 | 56920542 | 56922367 | 1826 | 1071 | 107 | 257.35 | 5.78  | 0    |
| chr9 | 56922921 | 56924629 | 1709 | 1131 | 83  | 174.27 | 7.47  | 0.07 |
| chr9 | 56978093 | 56979418 | 1326 | 895  | 72  | 81.45  | 4.24  | 0.1  |
| chr9 | 56995423 | 56996710 | 1288 | 523  | 62  | 95.61  | 5.31  | 0.08 |
| chr9 | 57108993 | 57111095 | 2103 | 459  | 88  | 70.75  | 4.15  | 0.16 |
| chr9 | 57287391 | 57288400 | 1010 | 541  | 44  | 89.81  | 7.44  | 0.07 |
| chr9 | 57384911 | 57386170 | 1260 | 522  | 62  | 198.92 | 10.22 | 0    |
| chr9 | 57492686 | 57493915 | 1230 | 737  | 69  | 216.99 | 10.71 | 0    |
| chr9 | 57556098 | 57556924 | 827  | 288  | 30  | 72.03  | 7.53  | 0.15 |
| chr9 | 57611790 | 57613995 | 2206 | 1237 | 120 | 316.92 | 9.78  | 0    |
| chr9 | 57684243 | 57685313 | 1071 | 689  | 41  | 90.11  | 5.78  | 0.07 |
| chr9 | 57758123 | 57759229 | 1107 | 674  | 64  | 189.26 | 7.08  | 0    |
| chr9 | 58428573 | 58429379 | 807  | 316  | 33  | 100.21 | 7.77  | 0.08 |
| chr9 | 59329734 | 59330630 | 897  | 514  | 31  | 76.3   | 5.84  | 0.12 |
| chr9 | 59333322 | 59335286 | 1965 | 1086 | 112 | 132.85 | 5.97  | 0.08 |
| chr9 | 59386713 | 59390213 | 3501 | 835  | 203 | 367.93 | 9.56  | 0    |
| chr9 | 59464382 | 59465955 | 1574 | 463  | 68  | 115.02 | 5.39  | 0.06 |
| chr9 | 59503500 | 59505951 | 2452 | 547  | 140 | 277.79 | 7.83  | 0    |
| chr9 | 59598183 | 59599829 | 1647 | 1144 | 63  | 77.4   | 4.85  | 0.12 |
| chr9 | 61218851 | 61221135 | 2285 | 549  | 101 | 203.74 | 5.71  | 0    |

|      |          |          |      |      |     |        |       |      |
|------|----------|----------|------|------|-----|--------|-------|------|
| chr9 | 61761599 | 61763109 | 1511 | 744  | 71  | 170.62 | 6.33  | 0.06 |
| chr9 | 61794246 | 61795110 | 865  | 455  | 32  | 85.27  | 6.29  | 0.07 |
| chr9 | 61969891 | 61971017 | 1127 | 514  | 48  | 78.29  | 5.49  | 0.12 |
| chr9 | 62190186 | 62192779 | 2594 | 1235 | 168 | 564.11 | 9.25  | 0    |
| chr9 | 62658986 | 62661178 | 2193 | 939  | 94  | 171.95 | 5.5   | 0.06 |
| chr9 | 62827889 | 62829020 | 1132 | 778  | 55  | 186.07 | 10.79 | 0    |
| chr9 | 63225151 | 63226141 | 991  | 458  | 43  | 82.64  | 6.22  | 0.11 |
| chr9 | 63246306 | 63247765 | 1460 | 578  | 77  | 164.65 | 6.07  | 0.06 |
| chr9 | 63605287 | 63606619 | 1333 | 839  | 59  | 159.29 | 7.69  | 0.11 |
| chr9 | 63870175 | 63871305 | 1131 | 660  | 48  | 98.86  | 5.39  | 0.08 |
| chr9 | 64026555 | 64027717 | 1163 | 587  | 64  | 116.45 | 8.09  | 0.07 |
| chr9 | 64100316 | 64101870 | 1555 | 1036 | 73  | 94.14  | 5     | 0.07 |
| chr9 | 64187894 | 64189446 | 1553 | 679  | 88  | 273.85 | 7.72  | 0    |
| chr9 | 64585017 | 64586370 | 1354 | 828  | 86  | 204.24 | 7.83  | 0    |
| chr9 | 64658791 | 64659668 | 878  | 420  | 34  | 94.79  | 7.19  | 0.07 |
| chr9 | 64808260 | 64809179 | 920  | 484  | 41  | 82.58  | 6.22  | 0.11 |
| chr9 | 65043200 | 65044962 | 1763 | 1181 | 92  | 251.14 | 6.06  | 0    |
| chr9 | 65048916 | 65049873 | 958  | 457  | 31  | 89.93  | 9.32  | 0.07 |
| chr9 | 65193410 | 65194927 | 1518 | 416  | 64  | 161.57 | 7.28  | 0.11 |
| chr9 | 65393122 | 65394770 | 1649 | 547  | 80  | 108.61 | 5.24  | 0.06 |
| chr9 | 65408047 | 65409403 | 1357 | 965  | 47  | 94.71  | 5.89  | 0.07 |
| chr9 | 65426071 | 65429300 | 3230 | 1685 | 187 | 363.09 | 7.69  | 0    |
| chr9 | 65732453 | 65733366 | 914  | 422  | 44  | 108.69 | 8.09  | 0.06 |
| chr9 | 65971830 | 65973093 | 1264 | 813  | 55  | 85.86  | 5.3   | 0.07 |
| chr9 | 66359205 | 66360341 | 1137 | 512  | 57  | 100.23 | 7.31  | 0.08 |
| chr9 | 66440238 | 66441619 | 1382 | 501  | 77  | 237.31 | 9.93  | 0    |
| chr9 | 66678370 | 66679763 | 1394 | 468  | 54  | 145.42 | 7.57  | 0.09 |
| chr9 | 66680827 | 66681747 | 921  | 473  | 42  | 131.96 | 7.83  | 0.08 |
| chr9 | 66682112 | 66683256 | 1145 | 550  | 57  | 128.44 | 7.16  | 0.08 |
| chr9 | 66734172 | 66735346 | 1175 | 645  | 50  | 91.21  | 5.91  | 0.07 |
| chr9 | 66766199 | 66767986 | 1788 | 503  | 93  | 202.07 | 6.89  | 0    |
| chr9 | 66793232 | 66794528 | 1297 | 498  | 68  | 194.06 | 7.24  | 0    |
| chr9 | 66822494 | 66823558 | 1065 | 561  | 45  | 98.65  | 4.92  | 0.08 |
| chr9 | 66891028 | 66892145 | 1118 | 532  | 44  | 134.35 | 6.91  | 0.08 |
| chr9 | 69245328 | 69246347 | 1020 | 486  | 45  | 110.81 | 8.46  | 0.06 |
| chr9 | 69836824 | 69837928 | 1105 | 542  | 55  | 91.8   | 6.79  | 0.07 |
| chr9 | 69859776 | 69860910 | 1135 | 558  | 53  | 116.42 | 8.74  | 0.07 |
| chr9 | 70350174 | 70352208 | 2035 | 1394 | 103 | 253.63 | 8.74  | 0    |
| chr9 | 70503874 | 70505665 | 1792 | 1085 | 86  | 197.22 | 7.44  | 0    |
| chr9 | 70526093 | 70527435 | 1343 | 861  | 60  | 108.69 | 5.99  | 0.06 |
| chr9 | 71333085 | 71334231 | 1147 | 759  | 48  | 123.7  | 6.07  | 0.07 |
| chr9 | 71959175 | 71960077 | 903  | 403  | 35  | 70.6   | 7.74  | 0.16 |
| chr9 | 71980471 | 71981693 | 1223 | 675  | 56  | 133.16 | 8.44  | 0.08 |
| chr9 | 72122208 | 72123114 | 907  | 478  | 37  | 95.56  | 10.11 | 0.08 |

|      |           |           |      |      |     |        |       |      |
|------|-----------|-----------|------|------|-----|--------|-------|------|
| chr9 | 72960765  | 72961576  | 812  | 437  | 33  | 86.31  | 6.88  | 0.07 |
| chr9 | 74799552  | 74801182  | 1631 | 1119 | 78  | 97.7   | 5.09  | 0.08 |
| chr9 | 74885240  | 74886037  | 798  | 446  | 27  | 89.45  | 7.57  | 0.07 |
| chr9 | 74918474  | 74920550  | 2077 | 1507 | 101 | 187.37 | 6.07  | 0    |
| chr9 | 75256624  | 75258652  | 2029 | 1319 | 120 | 303.86 | 10.49 | 0    |
| chr9 | 77758024  | 77759259  | 1236 | 367  | 63  | 232.55 | 9.94  | 0    |
| chr9 | 77764583  | 77765563  | 981  | 542  | 47  | 78.96  | 6.26  | 0.1  |
| chr9 | 77960727  | 77961555  | 829  | 402  | 29  | 73.33  | 7.19  | 0.13 |
| chr9 | 78023338  | 78024439  | 1102 | 429  | 46  | 82.43  | 5.29  | 0.11 |
| chr9 | 78324347  | 78325572  | 1226 | 242  | 46  | 84.51  | 4.57  | 0.06 |
| chr9 | 78328240  | 78330023  | 1784 | 1240 | 137 | 384.76 | 9.61  | 0    |
| chr9 | 78435374  | 78436788  | 1415 | 416  | 61  | 132.52 | 5.63  | 0.08 |
| chr9 | 82867703  | 82868385  | 683  | 433  | 25  | 73.38  | 6.19  | 0.13 |
| chr9 | 82868640  | 82869978  | 1339 | 880  | 67  | 134.66 | 8.09  | 0.08 |
| chr9 | 83818239  | 83819013  | 775  | 367  | 30  | 90.92  | 8.57  | 0.07 |
| chr9 | 85219870  | 85221828  | 1959 | 1170 | 100 | 240.14 | 7.26  | 0    |
| chr9 | 85641926  | 85643822  | 1897 | 1245 | 94  | 201.04 | 5.6   | 0    |
| chr9 | 86916497  | 86917464  | 968  | 470  | 51  | 145.46 | 8.44  | 0.09 |
| chr9 | 88333420  | 88334585  | 1166 | 398  | 56  | 92.05  | 6     | 0.07 |
| chr9 | 88417257  | 88418578  | 1322 | 418  | 49  | 115.2  | 7.66  | 0.06 |
| chr9 | 89948809  | 89950079  | 1271 | 592  | 73  | 146.39 | 6.32  | 0.09 |
| chr9 | 90008038  | 90010146  | 2109 | 780  | 137 | 484.71 | 11.5  | 0    |
| chr9 | 92144701  | 92145774  | 1074 | 526  | 43  | 120.81 | 8.09  | 0.07 |
| chr9 | 94437738  | 94439537  | 1800 | 839  | 67  | 167    | 6.37  | 0.06 |
| chr9 | 95757567  | 95758570  | 1004 | 545  | 39  | 77.49  | 6.33  | 0.12 |
| chr9 | 95854723  | 95855688  | 966  | 495  | 46  | 184.66 | 11.33 | 0    |
| chr9 | 96263683  | 96264451  | 769  | 517  | 33  | 124.66 | 11.87 | 0.07 |
| chr9 | 96337891  | 96338996  | 1106 | 552  | 44  | 107.53 | 7.69  | 0.06 |
| chr9 | 96378680  | 96379418  | 739  | 484  | 40  | 158.2  | 11.04 | 0.11 |
| chr9 | 96531344  | 96532200  | 857  | 595  | 40  | 86.38  | 6.53  | 0.07 |
| chr9 | 96619578  | 96620717  | 1140 | 808  | 50  | 157.91 | 7.86  | 0.11 |
| chr9 | 98196850  | 98198309  | 1460 | 993  | 59  | 133.36 | 6.16  | 0.08 |
| chr9 | 98463680  | 98464655  | 976  | 538  | 47  | 109.23 | 6.15  | 0.06 |
| chr9 | 99475920  | 99476640  | 721  | 347  | 30  | 72.03  | 6.93  | 0.15 |
| chr9 | 100542841 | 100544352 | 1512 | 748  | 101 | 298.25 | 8.39  | 0    |
| chr9 | 100544400 | 100545291 | 892  | 339  | 37  | 90.14  | 5.32  | 0.07 |
| chr9 | 100977502 | 100979294 | 1793 | 500  | 79  | 73.38  | 4.81  | 0.13 |
| chr9 | 102527923 | 102529162 | 1240 | 815  | 65  | 109.22 | 5.15  | 0.06 |
| chr9 | 103206886 | 103207905 | 1020 | 511  | 40  | 126.34 | 11.63 | 0.07 |
| chr9 | 103267551 | 103268734 | 1184 | 834  | 55  | 101.15 | 4.91  | 0.08 |
| chr9 | 103964990 | 103965990 | 1001 | 330  | 40  | 106.11 | 7.24  | 0.06 |
| chr9 | 104164279 | 104165926 | 1648 | 1129 | 69  | 142.02 | 6.68  | 0.09 |
| chr9 | 105396772 | 105398185 | 1414 | 821  | 83  | 269.15 | 8.83  | 0    |
| chr9 | 106072490 | 106073854 | 1365 | 764  | 62  | 91.28  | 4.7   | 0.07 |

|      |           |           |      |      |     |        |       |      |
|------|-----------|-----------|------|------|-----|--------|-------|------|
| chr9 | 106149835 | 106150874 | 1040 | 358  | 49  | 137.01 | 8.48  | 0.08 |
| chr9 | 106269535 | 106271831 | 2297 | 522  | 106 | 112.03 | 4.05  | 0.06 |
| chr9 | 106331350 | 106332291 | 942  | 456  | 35  | 86.46  | 5.96  | 0.07 |
| chr9 | 106378741 | 106380003 | 1263 | 842  | 52  | 93.29  | 5.43  | 0.07 |
| chr9 | 106587162 | 106588395 | 1234 | 897  | 49  | 134.31 | 8.54  | 0.08 |
| chr9 | 106690990 | 106691918 | 929  | 460  | 39  | 132.67 | 12.14 | 0.08 |
| chr9 | 106723984 | 106725039 | 1056 | 198  | 63  | 221.93 | 8.48  | 0    |
| chr9 | 106793828 | 106795070 | 1243 | 513  | 62  | 91.48  | 5.47  | 0.07 |
| chr9 | 107455900 | 107458219 | 2320 | 1213 | 145 | 210.68 | 6.31  | 0    |
| chr9 | 107465117 | 107466243 | 1127 | 453  | 60  | 179.32 | 9.19  | 0    |
| chr9 | 107470805 | 107471772 | 968  | 411  | 37  | 73.83  | 6.42  | 0.13 |
| chr9 | 107482494 | 107484016 | 1523 | 511  | 79  | 173.25 | 8.69  | 0.07 |
| chr9 | 107535179 | 107536766 | 1588 | 460  | 66  | 122.44 | 6.26  | 0.07 |
| chr9 | 107537048 | 107538411 | 1364 | 538  | 89  | 319.87 | 12.87 | 0    |
| chr9 | 107542199 | 107543606 | 1408 | 571  | 84  | 112.43 | 5.59  | 0.06 |
| chr9 | 107546525 | 107547392 | 868  | 535  | 34  | 88.94  | 7.16  | 0.07 |
| chr9 | 107672393 | 107673866 | 1474 | 1024 | 67  | 116.22 | 5.78  | 0.07 |
| chr9 | 107774494 | 107775700 | 1207 | 484  | 61  | 180.93 | 8.86  | 0    |
| chr9 | 107904570 | 107905786 | 1217 | 519  | 55  | 103.93 | 6.85  | 0.06 |
| chr9 | 107951034 | 107952172 | 1139 | 553  | 72  | 165.32 | 10.62 | 0.06 |
| chr9 | 107996361 | 107997282 | 922  | 603  | 40  | 77.74  | 5.6   | 0.12 |
| chr9 | 108165734 | 108166804 | 1071 | 570  | 46  | 81.24  | 5.69  | 0.1  |
| chr9 | 108240928 | 108245012 | 4085 | 711  | 256 | 408.95 | 8.51  | 0    |
| chr9 | 108362487 | 108363518 | 1032 | 405  | 54  | 151.92 | 8.09  | 0.1  |
| chr9 | 108392399 | 108393710 | 1312 | 594  | 78  | 156.29 | 6.62  | 0.11 |
| chr9 | 108409585 | 108411310 | 1726 | 811  | 83  | 110.33 | 3.57  | 0.06 |
| chr9 | 108418592 | 108420597 | 2006 | 513  | 84  | 201.26 | 6.62  | 0    |
| chr9 | 108461960 | 108462987 | 1028 | 828  | 50  | 94.7   | 6.42  | 0.07 |
| chr9 | 108468822 | 108470894 | 2073 | 988  | 125 | 258.06 | 7.33  | 0    |
| chr9 | 108550672 | 108552632 | 1961 | 1039 | 101 | 215.16 | 6.59  | 0    |
| chr9 | 108755823 | 108757343 | 1521 | 624  | 74  | 175.41 | 6.74  | 0.07 |
| chr9 | 108940649 | 108941503 | 855  | 408  | 46  | 149.56 | 10.76 | 0.1  |
| chr9 | 108959968 | 108962625 | 2658 | 1750 | 123 | 108.43 | 5.64  | 0.06 |
| chr9 | 109833595 | 109834687 | 1093 | 413  | 53  | 143.92 | 6.62  | 0.09 |
| chr9 | 110034183 | 110034949 | 767  | 432  | 35  | 99.08  | 6.21  | 0.08 |
| chr9 | 110207222 | 110208454 | 1233 | 417  | 59  | 95.7   | 6.26  | 0.08 |
| chr9 | 110378693 | 110380107 | 1415 | 463  | 92  | 148.56 | 6.31  | 0.1  |
| chr9 | 110434332 | 110435669 | 1338 | 519  | 66  | 199.86 | 10.11 | 0    |
| chr9 | 110580504 | 110581535 | 1032 | 798  | 39  | 109.34 | 5.17  | 0.06 |
| chr9 | 110782326 | 110783228 | 903  | 513  | 33  | 70.43  | 6.16  | 0.16 |
| chr9 | 111173407 | 111174861 | 1455 | 1038 | 72  | 70.03  | 4.34  | 0.16 |
| chr9 | 113616548 | 113617872 | 1325 | 780  | 60  | 192.35 | 8.09  | 0    |
| chr9 | 113649872 | 113650979 | 1108 | 556  | 55  | 170.34 | 9.3   | 0.06 |
| chr9 | 113839359 | 113840499 | 1141 | 715  | 50  | 162.69 | 8.09  | 0.12 |

|      |           |           |      |      |     |        |       |      |
|------|-----------|-----------|------|------|-----|--------|-------|------|
| chr9 | 114309482 | 114310925 | 1444 | 759  | 73  | 126.34 | 5.74  | 0.07 |
| chr9 | 114409222 | 114409851 | 630  | 362  | 22  | 77.31  | 6.93  | 0.12 |
| chr9 | 114639765 | 114640841 | 1077 | 522  | 53  | 86.73  | 5.82  | 0.07 |
| chr9 | 114661702 | 114662791 | 1090 | 397  | 62  | 130.51 | 8.09  | 0.08 |
| chr9 | 114689941 | 114691656 | 1716 | 490  | 111 | 287.02 | 7.77  | 0    |
| chr9 | 114842406 | 114843582 | 1177 | 587  | 59  | 140.83 | 8.09  | 0.09 |
| chr9 | 115218681 | 115220581 | 1901 | 496  | 95  | 241.48 | 7.04  | 0    |
| chr9 | 116083539 | 116084893 | 1355 | 852  | 54  | 99.69  | 6.07  | 0.08 |
| chr9 | 117949036 | 117950528 | 1493 | 991  | 73  | 186.41 | 7.46  | 0    |
| chr9 | 118997235 | 118998202 | 968  | 491  | 38  | 73.39  | 6.81  | 0.13 |
| chr9 | 119231130 | 119232698 | 1569 | 449  | 103 | 120.01 | 4.95  | 0.07 |
| chr9 | 119249729 | 119250786 | 1058 | 472  | 48  | 133.13 | 7.54  | 0.08 |
| chr9 | 119310690 | 119311969 | 1280 | 830  | 51  | 146.37 | 6.55  | 0.09 |
| chr9 | 119803343 | 119804431 | 1089 | 582  | 46  | 94.65  | 8.76  | 0.07 |
| chr9 | 119945997 | 119946972 | 976  | 424  | 37  | 95.47  | 5.65  | 0.08 |
| chr9 | 120401141 | 120402251 | 1111 | 642  | 45  | 142.35 | 9.43  | 0.09 |
| chr9 | 120480006 | 120481166 | 1161 | 688  | 51  | 97.41  | 5.6   | 0.08 |
| chr9 | 120842076 | 120843131 | 1056 | 564  | 47  | 142.88 | 11.81 | 0.09 |
| chr9 | 121222837 | 121224515 | 1679 | 501  | 70  | 80.81  | 4.05  | 0.1  |
| chr9 | 121613564 | 121614559 | 996  | 419  | 41  | 82.66  | 5.73  | 0.11 |
| chr9 | 121627461 | 121629098 | 1638 | 542  | 73  | 70.52  | 4.59  | 0.16 |
| chr9 | 121766233 | 121767759 | 1527 | 969  | 87  | 222.76 | 7.1   | 0    |
| chr9 | 122774530 | 122775387 | 858  | 489  | 37  | 115.13 | 9.44  | 0.06 |
| chr9 | 122859451 | 122860594 | 1144 | 680  | 49  | 101.97 | 6.74  | 0.05 |
| chr9 | 122930139 | 122930767 | 629  | 449  | 26  | 95.51  | 9.05  | 0.08 |
| chr9 | 123021829 | 123022855 | 1027 | 487  | 55  | 88.77  | 8.32  | 0.07 |
| chr9 | 123387460 | 123388432 | 973  | 518  | 37  | 92.11  | 7.59  | 0.07 |
| chr9 | 123437655 | 123439791 | 2137 | 961  | 123 | 315.17 | 9.34  | 0    |
| chr9 | 123759868 | 123762077 | 2210 | 1157 | 99  | 171.15 | 4.79  | 0.06 |
| chrX | 7225661   | 7226561   | 901  | 481  | 28  | 84.14  | 8.74  | 0.06 |
| chrX | 7305164   | 7305945   | 782  | 452  | 31  | 116.37 | 10.35 | 0.07 |
| chrX | 7339355   | 7340376   | 1022 | 415  | 42  | 138.62 | 8.6   | 0.09 |
| chrX | 7340481   | 7341547   | 1067 | 189  | 40  | 137.93 | 6.91  | 0.09 |
| chrX | 7418040   | 7419370   | 1331 | 312  | 52  | 82.06  | 4.67  | 0.1  |
| chrX | 7673805   | 7674419   | 615  | 291  | 21  | 73.36  | 7.57  | 0.13 |
| chrX | 7722014   | 7723258   | 1245 | 437  | 51  | 127.08 | 7.69  | 0.07 |
| chrX | 12164227  | 12165266  | 1040 | 431  | 41  | 82.58  | 5.98  | 0.11 |
| chrX | 12250180  | 12251133  | 954  | 533  | 35  | 97.52  | 8.09  | 0.08 |
| chrX | 12338648  | 12339508  | 861  | 378  | 30  | 100.83 | 7.57  | 0.08 |
| chrX | 12618910  | 12619602  | 693  | 263  | 22  | 70.63  | 8.16  | 0.16 |
| chrX | 12647758  | 12649677  | 1920 | 846  | 90  | 300.53 | 8.57  | 0    |
| chrX | 12857325  | 12858747  | 1423 | 892  | 72  | 264.98 | 12.95 | 0    |
| chrX | 13423427  | 13424252  | 826  | 361  | 32  | 118.46 | 8.74  | 0.07 |
| chrX | 17739041  | 17740862  | 1822 | 491  | 86  | 163.32 | 4.79  | 0.06 |

|      |           |           |      |      |    |        |       |      |
|------|-----------|-----------|------|------|----|--------|-------|------|
| chrX | 18744031  | 18744843  | 813  | 357  | 27 | 87.72  | 10.49 | 0.07 |
| chrX | 20281021  | 20282116  | 1096 | 674  | 49 | 198.07 | 10.49 | 0    |
| chrX | 20506698  | 20507670  | 973  | 590  | 37 | 127.47 | 8.43  | 0.07 |
| chrX | 34137644  | 34138589  | 946  | 430  | 34 | 115.96 | 9.32  | 0.07 |
| chrX | 35917569  | 35918255  | 687  | 489  | 22 | 71.29  | 6.41  | 0.15 |
| chrX | 39501595  | 39503155  | 1561 | 719  | 61 | 213.36 | 9.9   | 0    |
| chrX | 39504554  | 39505266  | 713  | 380  | 23 | 74.48  | 8.16  | 0.13 |
| chrX | 45806928  | 45807912  | 985  | 517  | 38 | 91.09  | 8.09  | 0.07 |
| chrX | 45866384  | 45867036  | 653  | 218  | 25 | 79.84  | 7.92  | 0.1  |
| chrX | 53708578  | 53709517  | 940  | 710  | 38 | 116.73 | 7.61  | 0.07 |
| chrX | 69061697  | 69062316  | 620  | 369  | 21 | 72.18  | 8.09  | 0.15 |
| chrX | 71160016  | 71160673  | 658  | 194  | 24 | 75.6   | 7.08  | 0.13 |
| chrX | 71166847  | 71167791  | 945  | 503  | 34 | 115.15 | 8.67  | 0.06 |
| chrX | 71211104  | 71213190  | 2087 | 725  | 89 | 252.07 | 7.64  | 0    |
| chrX | 71488744  | 71489459  | 716  | 465  | 26 | 92.35  | 9.25  | 0.07 |
| chrX | 71491306  | 71492230  | 925  | 415  | 29 | 86.74  | 14.45 | 0.07 |
| chrX | 71515674  | 71517164  | 1491 | 554  | 72 | 115.71 | 6.26  | 0.06 |
| chrX | 71527517  | 71528460  | 944  | 498  | 34 | 116.21 | 9.32  | 0.07 |
| chrX | 71542072  | 71542689  | 618  | 348  | 22 | 79.42  | 6.99  | 0.1  |
| chrX | 71557992  | 71558916  | 925  | 445  | 35 | 88.47  | 5.96  | 0.07 |
| chrX | 71613588  | 71614359  | 772  | 257  | 34 | 140.6  | 9.32  | 0.09 |
| chrX | 71618214  | 71619153  | 940  | 342  | 40 | 129.21 | 9.52  | 0.08 |
| chrX | 71673963  | 71675489  | 1527 | 471  | 58 | 91.81  | 5.83  | 0.07 |
| chrX | 91368070  | 91368893  | 824  | 425  | 30 | 98.96  | 8.16  | 0.08 |
| chrX | 91479952  | 91480916  | 965  | 429  | 36 | 125.57 | 9.25  | 0.07 |
| chrX | 92361444  | 92362094  | 651  | 432  | 24 | 88.33  | 6.99  | 0.07 |
| chrX | 93436656  | 93437425  | 770  | 365  | 29 | 105.86 | 8.16  | 0.06 |
| chrX | 96132059  | 96133683  | 1625 | 567  | 94 | 246.19 | 10.89 | 0    |
| chrX | 98417451  | 98418124  | 674  | 477  | 26 | 85.73  | 6.57  | 0.07 |
| chrX | 98624020  | 98624983  | 964  | 532  | 33 | 107.45 | 6.99  | 0.06 |
| chrX | 98834877  | 98835723  | 847  | 411  | 33 | 76.86  | 5.78  | 0.12 |
| chrX | 100816856 | 100817706 | 851  | 509  | 31 | 100.25 | 8.09  | 0.08 |
| chrX | 101175904 | 101176861 | 958  | 528  | 35 | 111.65 | 6.47  | 0.06 |
| chrX | 131076008 | 131076778 | 771  | 349  | 26 | 86.36  | 9.32  | 0.07 |
| chrX | 131543284 | 131544100 | 817  | 344  | 27 | 87.26  | 7.57  | 0.07 |
| chrX | 133275433 | 133276386 | 954  | 403  | 40 | 112.35 | 7.24  | 0.06 |
| chrX | 136144823 | 136145666 | 844  | 316  | 35 | 82.44  | 5.15  | 0.11 |
| chrX | 137076404 | 137078081 | 1678 | 1343 | 88 | 279.16 | 10.52 | 0    |
| chrX | 139115569 | 139116553 | 985  | 483  | 40 | 150.88 | 10.49 | 0.1  |
| chrX | 146912324 | 146912936 | 613  | 418  | 28 | 101.82 | 9.52  | 0.05 |
| chrX | 147954627 | 147955985 | 1359 | 1117 | 55 | 158.34 | 10.57 | 0.11 |
| chrX | 151646353 | 151647345 | 993  | 624  | 42 | 163.74 | 9.9   | 0.06 |
| chrX | 155692957 | 155694202 | 1246 | 283  | 40 | 102.82 | 7.55  | 0.06 |
| chrX | 157203697 | 157204440 | 744  | 357  | 24 | 70.88  | 10.25 | 0.16 |

|      |           |           |      |      |     |        |       |     |
|------|-----------|-----------|------|------|-----|--------|-------|-----|
| chrX | 162947809 | 162948678 | 870  | 323  | 34  | 79.11  | 5.39  | 0.1 |
| chrX | 163643241 | 163645436 | 2196 | 672  | 144 | 709.19 | 13.48 | 0   |
| chrX | 163645679 | 163648914 | 3236 | 1408 | 183 | 846.23 | 17.45 | 0   |
